# Supplementary material for: Single-cell transcriptome reveals insights into the development and function of the zebrafish ovary
Source: eLife. 2022 May 19;11:e76014. doi: 10.7554/eLife.76014 (PMC9191896; doi:10.7554/eLife.76014)
Supplement: Supplementary file 3. [file elife-76014-supp3.xlsx]

## Sheet: All Follicle Cells
	p_val	avg_logFC	pct.1	pct.2	p_val_adj	cluster	gene
itm2bb	0	0.693641	1	0.977	0	1	itm2bb
sparc	0	0.922825	0.996	0.866	0	1	sparc
marcksl1a	0	1.1313	0.981	0.644	0	1	marcksl1a
cd74b	0	1.45307	0.943	0.449	0	1	cd74b
cd74a	0	1.38075	0.929	0.42	0	1	cd74a
gmds	0	1.13983	0.749	0.157	0	0	gmds
cahz	0	1.63437	0.678	0.075	0	3	cahz
mcm6	0	1.13508	0.923	0.068	0	4	mcm6
zgc:114181	0	1.42519	0.85	0.063	0	3	zgc:114181
emilin1a	0	1.04135	0.756	0.056	0	3	emilin1a
mcm2	0	1.11761	0.821	0.053	0	4	mcm2
ackr3b	0	1.25147	0.725	0.042	0	3	ackr3b
si:dkey-188i13.6	0	1.12596	0.617	0.039	0	3	si:dkey-188i13.6
mcm4	0	0.911756	0.715	0.037	0	4	mcm4
krt94	0	1.52202	0.692	0.032	0	3	krt94
ehd2b	0	1.15318	0.672	0.03	0	3	ehd2b
pcna	0	1.61914	0.749	0.026	0	4	pcna
cdh4	0	1.12114	0.731	0.025	0	3	cdh4
krt18b	0	1.31417	0.63	0.021	0	3	krt18b
irx5a	0	0.722092	0.606	0.021	0	3	irx5a
lhx9	0	1.11142	0.672	0.02	0	3	lhx9
nid1b	0	1.40373	0.803	0.018	0	5	nid1b
cfl1l	0	1.87988	0.749	0.018	0	3	cfl1l
irx3a	0	0.915251	0.67	0.018	0	3	irx3a
fgfr3	0	1.16792	0.628	0.018	0	3	fgfr3
slc4a4a	0	1.699	0.822	0.017	0	3	slc4a4a
icn	0	2.12687	0.791	0.017	0	3	icn
fgfr4	0	1.21965	0.608	0.016	0	3	fgfr4
afap1l1a	0	0.552196	0.463	0.015	0	3	afap1l1a
pcolceb	0	0.94921	0.487	0.013	0	3	pcolceb
tmeff1b	0	0.77189	0.542	0.011	0	3	tmeff1b
atoh8	0	0.627886	0.493	0.011	0	3	atoh8
fn1b	0	0.891781	0.438	0.011	0	3	fn1b
si:ch211-207d6.2	0	0.853358	0.628	0.009	0	3	si:ch211-207d6.2
nog1	0	1.47186	0.535	0.006	0	3	nog1
ndrg1a	0	1.01504	0.443	0.006	0	3	ndrg1a
zgc:153311	0	1.28196	0.617	0.005	0	3	zgc:153311
gpm6ab	0	0.57479	0.396	0.005	0	3	gpm6ab
c6.1	0	0.991625	0.606	0.004	0	5	c6.1
ndnf	0	0.999848	0.507	0.004	0	5	ndnf
osr2	0	0.825705	0.479	0.003	0	5	osr2
krt4	0	1.37577	0.458	0.003	0	3	krt4
nog3	0	0.716765	0.423	0.003	0	3	nog3
si:ch211-105c13.3	4.28033e-307	0.808807	0.491	0.021	7.02573e-303	3	si:ch211-105c13.3
nfkbiaa	5.49308e-303	1.53848	0.518	0.027	9.01635e-299	3	nfkbiaa
bnc2	1.13566e-302	0.65933	0.522	0.028	1.86408e-298	3	bnc2
mcm3	1.94643e-299	0.892882	0.787	0.054	3.19487e-295	4	mcm3
marcksl1b	1.10878e-297	1.09688	0.975	0.678	1.81994e-293	1	marcksl1b
timp2a	3.68304e-292	0.786363	0.931	0.442	6.04534e-288	0	timp2a
ucmaa	1.93542e-289	0.698463	0.368	0.005	3.1768e-285	3	ucmaa
fzd10	1.52407e-285	0.463251	0.394	0.009	2.50161e-281	3	fzd10
si:ch211-222l21.1	7.90115e-284	1.55571	0.74	0.111	1.29689e-279	3	si:ch211-222l21.1
anxa1a	1.09598e-283	1.18836	0.513	0.032	1.79895e-279	3	anxa1a
dkk3b	6.98121e-279	0.745001	0.403	0.011	1.1459e-274	3	dkk3b
fxyd6l	1.10709e-278	1.06442	0.911	0.501	1.81718e-274	1	fxyd6l
cdca7a	3.05452e-278	0.941006	0.657	0.036	5.0137e-274	4	cdca7a
hpn	1.02677e-277	0.662893	0.568	0.045	1.68534e-273	3	hpn
mcm5	2.34756e-277	1.02372	0.768	0.056	3.85329e-273	4	mcm5
cx34.5	9.94053e-276	0.929962	0.695	0.163	1.63164e-271	0	cx34.5
cldnc	4.33515e-273	0.612804	0.43	0.016	7.11571e-269	3	cldnc
cxcl12a	2.39509e-271	1.34486	0.521	0.007	3.9313e-267	5	cxcl12a
csf1a	4.4753e-267	0.527583	0.344	0.005	7.34576e-263	3	csf1a
s100a10b1	4.09929e-265	1.77629	0.943	0.304	6.72857e-261	3	s100a10b
nid2a	1.25823e-264	0.725915	0.465	0.005	2.06526e-260	5	nid2a
tmem88b1	3.69801e-263	1.47067	0.845	0.029	6.06991e-259	5	tmem88b
id2a	2.78097e-259	1.40617	0.544	0.048	4.56468e-255	3	id2a
hbegfa	1.81674e-257	1.068	0.524	0.042	2.98199e-253	3	hbegfa
pdia2	3.82576e-255	0.88767	0.539	0.073	6.2796e-251	0	pdia2
rab6ba	2.10852e-254	0.515144	0.412	0.017	3.46092e-250	3	rab6ba
si:ch211-1a19.3	2.14109e-254	0.991537	0.615	0.066	3.51438e-250	3	si:ch211-1a19.3
fat2	7.48741e-254	0.462539	0.337	0.006	1.22898e-249	3	fat2
BX569787.1	3.65083e-252	0.60785	0.38	0.003	5.99247e-248	5	BX569787.1
fgfrl1a	3.33274e-249	0.450149	0.374	0.012	5.47036e-245	3	fgfrl1a
fstl3	2.26724e-241	1.16876	0.617	0.078	3.72145e-237	3	fstl3
ftr82	6.82124e-241	0.536896	0.441	0.026	1.11964e-236	3	ftr82
CR751602.2	1.64192e-239	0.614291	0.394	0.004	2.69505e-235	5	CR751602.2
ITLN1 (1 of many).1	3.21677e-237	0.467688	0.437	0.005	5.28001e-233	5	ITLN1 (1 of many).1
ccnd1	8.25241e-237	0.527403	0.445	0.028	1.35455e-232	3	ccnd1
rpa2	2.29289e-236	0.602554	0.435	0.014	3.76355e-232	4	rpa2
fen1	3.94498e-236	0.553025	0.401	0.01	6.4753e-232	4	fen1
arvcfb	6.5608e-236	0.403758	0.35	0.011	1.07689e-231	3	arvcfb
cotl1	4.32391e-235	0.679913	0.37	0.014	7.09726e-231	3	cotl1
camta1a	4.58281e-235	0.386825	0.302	0.004	7.52223e-231	3	camta1a
folr	1.22631e-234	0.761345	0.55	0.096	2.01287e-230	0	folr
hsbp1a	2.12188e-232	0.834067	0.621	0.085	3.48286e-228	3	hsbp1a
ifi30	7.69662e-232	1.17355	0.731	0.303	1.26332e-227	1	ifi30
si:ch211-156b7.4	1.12755e-231	0.594032	0.415	0.012	1.85077e-227	4	si:ch211-156b7.4
pdgfra	8.10542e-231	0.778965	0.958	0.612	1.33042e-226	1	pdgfra
ace	1.57123e-229	0.469647	0.377	0.016	2.57902e-225	3	ace
CU468917.1	5.10597e-229	0.570319	0.392	0.02	8.38094e-225	3	CU468917.1
fgl2a	3.31671e-227	0.497465	0.396	0.02	5.44405e-223	3	fgl2a
akap12b	5.83277e-227	0.895613	0.844	0.469	9.57391e-223	1	akap12b
angptl4	2.54016e-225	0.926441	0.892	0.558	4.16942e-221	0	angptl4
mxra8a	1.44992e-224	0.704202	0.511	0.051	2.37989e-220	3	mxra8a
midn	2.63314e-220	1.48516	0.601	0.087	4.32204e-216	3	midn
cmasa	9.0962e-220	0.674717	0.734	0.237	1.49305e-215	0	cmasa
si:ch1073-459j12.1	1.25396e-219	0.395626	0.408	0.005	2.05825e-215	5	si:ch1073-459j12.1
ppdpfb	1.26466e-218	1.27655	0.692	0.133	2.07582e-214	3	ppdpfb
dcn	8.7832e-218	0.510148	0.423	0.006	1.44167e-213	5	dcn
nat8l	9.39331e-218	0.629398	0.388	0.021	1.54182e-213	3	nat8l
rerglb	1.21529e-217	0.648757	0.591	0.141	1.99478e-213	1	rerglb
hells	1.31052e-217	0.548298	0.411	0.014	2.15109e-213	4	hells
htra1b	2.25546e-217	0.875323	0.749	0.305	3.70211e-213	1	htra1b
kctd12.2	3.34442e-217	0.94045	0.612	0.091	5.48954e-213	3	kctd12.2
myclb	3.37753e-217	0.794818	0.844	0.431	5.54388e-213	0	myclb
neurl1ab	6.66235e-215	0.363896	0.335	0.012	1.09356e-210	3	neurl1ab
chaf1a	2.16729e-214	0.625317	0.444	0.018	3.55739e-210	4	chaf1a
fam84a	4.04489e-214	0.554763	0.405	0.026	6.63928e-210	3	fam84a
si:ch211-207i1.2	8.87714e-211	0.372205	0.322	0.011	1.45709e-206	3	si:ch211-207i1.2
spaca4l	2.42638e-209	0.5187	0.264	0.003	3.98266e-205	3	spaca4l
cav1	4.22515e-209	0.875112	0.648	0.111	6.93517e-205	3	cav1
rplp0	6.05395e-209	0.35619	1	0.997	9.93695e-205	0	rplp0
ahnak	2.48428e-208	1.33401	0.841	0.256	4.0777e-204	3	ahnak
si:ch211-137i24.101	2.44189e-207	0.934581	0.705	0.128	4.00812e-203	3	si:ch211-137i24.10
nrxn1a	2.66712e-204	0.338289	0.352	0.004	4.37781e-200	5	nrxn1a
cxcl14	1.21572e-203	0.965283	0.707	0.294	1.99549e-199	1	cxcl14
selenoh	1.56365e-203	1.04633	0.744	0.079	2.56658e-199	4	selenoh
fhl1b	2.17028e-203	0.476282	0.357	0.018	3.56229e-199	3	fhl1b
ivns1abpa	3.58817e-203	0.571134	0.997	0.9	5.88962e-199	1	ivns1abpa
cd248a	2.34651e-201	0.598349	0.521	0.012	3.85157e-197	5	cd248a
alkbh3.1	7.20735e-201	0.475283	0.293	0.008	1.18301e-196	3	alkbh3.1
fabp11a	1.00347e-199	1.40315	0.521	0.012	1.64709e-195	5	fabp11a
neurl1b	2.10205e-199	0.279973	0.26	0.004	3.4503e-195	3	neurl1b
rasl11a	5.58873e-198	0.290236	0.267	0.005	9.17335e-194	3	rasl11a
epcam	6.70764e-196	1.15614	0.385	0.026	1.10099e-191	3	epcam
dusp5	8.98401e-196	0.721423	0.492	0.091	1.47464e-191	0	dusp5
col1a1a1	2.63125e-195	1.1532	0.746	0.031	4.31893e-191	5	col1a1a
tdrd1	2.45131e-194	0.534539	0.258	0.004	4.02358e-190	3	tdrd1
htra1a	1.33852e-193	0.608334	0.653	0.22	2.19705e-189	1	htra1a
cxcl20	9.34836e-190	0.392607	0.267	0.006	1.53444e-185	3	cxcl20
fxyd1	2.07696e-189	0.562605	0.39	0.03	3.40912e-185	3	fxyd1
rps2	6.58025e-189	0.323938	1	0.998	1.08008e-184	0	rps2
bmp6	6.22307e-188	0.51364	0.352	0.021	1.02146e-183	3	bmp6
inka1a	8.62515e-188	0.360889	0.273	0.007	1.41573e-183	3	inka1a
rpl10a	2.41942e-186	0.27889	1	1	3.97124e-182	0	rpl10a
her6	5.40751e-186	0.840642	0.899	0.609	8.87589e-182	0	her6
krt18a.1	9.06204e-186	0.594247	0.978	0.896	1.48744e-181	1	krt18a.1
rpa1	5.21292e-185	0.505913	0.435	0.022	8.55649e-181	4	rpa1
kcnip1b	2.0497e-184	0.279717	0.247	0.004	3.36438e-180	3	kcnip1b
tp53inp1	2.11745e-183	0.789516	0.64	0.229	3.47558e-179	1	tp53inp1
ccn2a	4.0574e-182	1.1136	0.337	0.02	6.65981e-178	3	ccn2a
tmem98	3.56798e-180	0.336552	0.289	0.011	5.85648e-176	3	tmem98
hpgd	9.85928e-177	0.612117	0.655	0.222	1.6183e-172	0	hpgd
FP101861.1	1.53437e-176	0.381005	0.391	0.018	2.51852e-172	4	FP101861.1
slc25a5	5.52731e-176	0.307047	1	1	9.07253e-172	0	slc25a5
hsp90ab1	1.0395e-175	0.343008	1	0.999	1.70623e-171	0	hsp90ab1
col1a1b1	3.75991e-175	1.23134	0.775	0.04	6.17152e-171	5	col1a1b
rdh8a	1.32073e-173	0.445582	0.556	0.152	2.16785e-169	0	rdh8a
sox6	2.83931e-173	0.661727	0.485	0.066	4.66044e-169	3	sox6
rpsa	3.16601e-172	0.299032	0.999	0.997	5.19669e-168	0	rpsa
col14a1a	5.37529e-172	0.275754	0.22	0.003	8.823e-168	3	col14a1a
col27a1b	9.84686e-172	0.360588	0.326	0.02	1.61626e-167	3	col27a1b
rpl19	3.32129e-171	0.24484	1	1	5.45156e-167	0	rpl19
mt-co3	4.37242e-171	0.30553	1	1	7.17689e-167	0	mt-co3
rps5	9.0741e-171	0.254323	1	1	1.48942e-166	0	rps5
ctsk	1.75666e-170	0.486724	0.489	0.064	2.88338e-166	3	ctsk
gstm.3	3.09564e-170	1.12594	0.531	0.083	5.08118e-166	3	gstm.3
si:ch211-66e2.3	2.1212e-168	0.364461	0.236	0.005	3.48173e-164	3	si:ch211-66e2.3
tcima	9.64485e-168	0.777926	0.251	0.007	1.58311e-163	3	tcima
uck2a	1.52828e-167	0.512688	0.945	0.623	2.50852e-163	0	uck2a
b2m	4.31624e-167	0.679462	0.981	0.787	7.08468e-163	1	b2m
krt151	1.89825e-166	1.53624	0.69	0.032	3.11579e-162	5	krt15
col6a1	1.56248e-165	0.55985	0.264	0.01	2.56466e-161	3	col6a1
tnfrsf9a	1.81448e-165	0.609471	0.284	0.014	2.97829e-161	3	tnfrsf9a
nupr1b	3.63257e-165	1.0276	0.825	0.569	5.9625e-161	0	nupr1b
serpine1	4.30837e-165	0.902938	0.548	0.159	7.07176e-161	0	serpine1
rbbp4	1.46771e-164	0.644453	0.522	0.043	2.4091e-160	4	rbbp4
rpl17	3.00042e-163	0.248	1	1	4.92488e-159	0	rpl17
nr5a1b	1.01721e-162	0.319101	0.271	0.012	1.66965e-158	3	nr5a1b
tfpia	6.17333e-162	0.949632	0.577	0.022	1.01329e-157	5	tfpia
rps3a	9.63691e-162	0.245428	1	1	1.5818e-157	0	rps3a
dnph1	5.37557e-161	0.336602	0.377	0.019	8.82346e-157	4	dnph1
rbpms2a	8.85984e-161	0.409871	0.275	0.013	1.45425e-156	3	rbpms2a
serpinf1	1.042e-160	0.363541	0.33	0.024	1.71035e-156	3	serpinf1
rpl9.1	1.89256e-159	0.269519	1	1	3.10644e-155	0	rpl9.1
jam2b	4.93652e-159	0.480523	0.253	0.009	8.1028e-155	3	jam2b
rps12	6.27947e-159	0.259307	1	1	1.03071e-154	0	rps12
gne	7.21777e-159	0.603208	0.442	0.097	1.18472e-154	0	gne
pcp4l1	1.00624e-158	0.279708	0.236	0.007	1.65164e-154	3	pcp4l1
sik1	1.17323e-158	0.812842	0.535	0.094	1.92575e-154	3	sik1
plpp1a	1.42264e-157	0.6936	0.5	0.137	2.33512e-153	1	plpp1a
txn	7.19974e-157	0.413663	0.289	0.016	1.18176e-152	3	txn
hoxb7a	7.77866e-157	0.229615	0.227	0.006	1.27679e-152	3	hoxb7a
sox4a.1	7.85514e-157	0.606315	0.295	0.018	1.28934e-152	3	sox4a.1
cxcl18b	4.40025e-155	1.60091	0.526	0.094	7.22257e-151	3	cxcl18b
ch25h	1.10606e-153	0.928703	0.313	0.023	1.81548e-149	3	ch25h
mibp2	1.12512e-153	0.56381	0.865	0.524	1.84677e-149	0	mibp2
rpl10	7.15926e-153	0.234096	1	1	1.17512e-148	0	rpl10
rassf7b	1.22316e-152	0.217675	0.198	0.003	2.00769e-148	3	rassf7b
eef1b2	1.50881e-152	0.391752	0.987	0.942	2.47657e-148	0	eef1b2
zgc:92818	2.10868e-152	0.491097	0.306	0.021	3.46119e-148	3	zgc:92818
frmd6	3.25438e-152	0.471799	0.615	0.223	5.34174e-148	0	frmd6
cct3	4.55755e-152	0.628868	0.741	0.361	7.48077e-148	0	cct3
lig1	1.13072e-150	0.469879	0.353	0.018	1.85596e-146	4	lig1
dhfr	5.01979e-150	0.397084	0.28	0.009	8.23949e-146	4	dhfr
zgc:171686	3.09602e-149	0.209069	0.178	0.001	5.08181e-145	3	zgc:171686
hoxb3a	1.78715e-148	0.24467	0.251	0.011	2.93343e-144	3	hoxb3a
gstt1b	3.54855e-148	0.606875	0.888	0.692	5.82459e-144	1	gstt1b
gins1	1.24999e-146	0.321106	0.377	0.022	2.05173e-142	4	gins1
zgc:110182	1.29082e-146	0.844996	0.52	0.098	2.11876e-142	3	zgc:110182
rps7	9.08109e-146	0.223548	1	1	1.49057e-141	0	rps7
fras1	2.70609e-144	0.267225	0.256	0.013	4.44177e-140	3	fras1
rps8a	5.99623e-144	0.234339	1	1	9.84221e-140	0	rps8a
rpl22l1	2.8706e-143	0.532552	0.892	0.562	4.7118e-139	0	rpl22l1
pcdh7a	6.54372e-143	0.255839	0.268	0.003	1.07409e-138	5	pcdh7a
rps11	4.17841e-142	0.226391	1	1	6.85844e-138	0	rps11
trib3	3.45719e-141	0.58526	0.482	0.133	5.67463e-137	0	trib3
nanos1	5.40499e-141	0.739634	0.57	0.128	8.87175e-137	3	nanos1
rfc4	1.60986e-140	0.429127	0.324	0.016	2.64242e-136	4	rfc4
dchs1a	1.69835e-140	0.345573	0.328	0.03	2.78768e-136	3	dchs1a
prkag2a	1.71731e-140	0.439348	0.363	0.063	2.81879e-136	0	prkag2a
chtf8	5.67977e-140	0.306159	0.242	0.006	9.32277e-136	4	chtf8
rpl32	5.81395e-139	0.241526	1	1	9.54302e-135	0	rpl32
ablim1b	6.32997e-139	0.243798	0.227	0.009	1.039e-134	3	ablim1b
col1a2	1.11296e-138	0.813991	0.394	0.011	1.82682e-134	5	col1a2
fkbp1b1	1.98329e-138	0.706022	0.722	0.225	3.25537e-134	3	fkbp1b
orc6	7.63203e-138	0.40231	0.304	0.014	1.25272e-133	4	orc6
nr2f1a	5.8763e-137	0.419587	0.324	0.006	9.64536e-133	5	nr2f1a
si:dkey-225k4.1	6.89692e-137	0.473087	0.695	0.299	1.13206e-132	0	si:dkey-225k4.1
elovl1b	1.04656e-136	0.527031	0.401	0.053	1.71782e-132	3	elovl1b
rpl15	8.80521e-136	0.269658	1	0.997	1.44529e-131	0	rpl15
zgc:103700	9.80611e-136	0.747515	0.517	0.171	1.60958e-131	1	zgc:103700
si:ch73-335l21.41	2.14259e-135	1.59222	0.756	0.262	3.51684e-131	3	si:ch73-335l21.4
eef1g	2.67558e-135	0.28159	0.999	0.996	4.3917e-131	0	eef1g
flt4	3.29108e-135	0.178286	0.17	0.002	5.40198e-131	3	flt4
sulf2b	1.31913e-134	0.579997	0.765	0.406	2.16522e-130	0	sulf2b
col12a1b	1.91756e-134	0.265485	0.268	0.004	3.14749e-130	5	col12a1b
rpl11	3.25429e-134	0.217674	1	1	5.34159e-130	0	rpl11
rpl13	4.90144e-134	0.204431	1	1	8.04522e-130	0	rpl13
rplp2l	9.22137e-134	0.261883	1	0.999	1.5136e-129	0	rplp2l
spint1a	1.29035e-133	0.272953	0.196	0.005	2.11798e-129	3	spint1a
lurap1	8.12783e-133	0.226007	0.236	0.012	1.3341e-128	3	lurap1
mhc2b	1.70516e-132	0.594592	0.44	0.118	2.79884e-128	1	mhc2b
krt81	2.21775e-132	0.813027	1	0.909	3.64021e-128	3	krt8
frzb	5.16068e-132	0.264061	0.2	0.006	8.47075e-128	3	frzb
btf3	1.03778e-131	0.363927	0.982	0.909	1.70342e-127	0	btf3
shdb	1.59249e-131	0.28285	0.214	0.008	2.61392e-127	3	shdb
zgc:158423	8.6147e-131	0.363523	0.346	0.06	1.41402e-126	0	zgc:158423
rpa3	3.21534e-130	0.587318	0.396	0.03	5.27766e-126	4	rpa3
si:busm1-194e12.11	3.37557e-130	0.445353	0.438	0.111	5.54066e-126	1	si:busm1-194e12.11
si:dkey-151g10.6	1.51477e-129	0.252151	1	1	2.48634e-125	0	si:dkey-151g10.6
tspan18a	1.69337e-129	0.399833	0.512	0.168	2.7795e-125	0	tspan18a
orc4	2.25101e-129	0.286482	0.213	0.005	3.6948e-125	4	orc4
CABZ01073795.11	2.48897e-129	0.751438	0.412	0.06	4.08539e-125	3	CABZ01073795.1
tenm3	2.61005e-129	0.37674	0.357	0.043	4.28414e-125	3	tenm3
lamb2l	2.70157e-129	0.447972	0.56	0.206	4.43436e-125	1	lamb2l
p3h2	8.46727e-129	0.213092	0.192	0.005	1.38982e-124	3	p3h2
si:dkey-28b4.7	2.91474e-128	0.661022	0.452	0.08	4.78426e-124	3	si:dkey-28b4.7
c1qtnf12	3.04889e-128	0.174808	0.152	0.001	5.00445e-124	3	c1qtnf12
rpl5a	5.59462e-128	0.357204	0.982	0.883	9.18301e-124	0	rpl5a
ca16b	5.45796e-127	0.230283	0.209	0.008	8.95869e-123	3	ca16b
col6a31	1.09863e-126	0.754499	0.451	0.017	1.8033e-122	5	col6a3
rps23	1.61889e-126	0.23108	1	0.999	2.65724e-122	0	rps23
hspb8	3.02998e-126	0.261915	0.244	0.015	4.97342e-122	3	hspb8
rpl23	3.80859e-126	0.232853	1	0.999	6.25142e-122	0	rpl23
tmsb1	4.67671e-126	0.610453	0.769	0.431	7.67636e-122	1	tmsb1
gcga	7.52798e-126	0.503171	0.165	0.002	1.23564e-121	3	gcga
hbegfb	8.29443e-126	0.235782	0.198	0.007	1.36145e-121	3	hbegfb
stmn1a	2.71846e-125	1.03517	0.478	0.05	4.46208e-121	4	stmn1a
CABZ01092746.1	6.72692e-125	0.253494	0.2	0.007	1.10416e-120	3	CABZ01092746.1
rps10	8.90992e-125	0.186463	1	1	1.46247e-120	0	rps10
zgc:152791	9.54013e-125	1.12965	0.714	0.237	1.56592e-120	3	zgc:152791
rpl13a	1.15917e-124	0.19689	1	1	1.90265e-120	0	rpl13a
rpl18a	2.04747e-124	0.227855	1	1	3.36072e-120	0	rpl18a
alcama	3.08589e-124	0.403617	0.991	0.97	5.06518e-120	1	alcama
cd1511	9.7213e-124	0.730119	0.592	0.032	1.59565e-119	5	cd151
anxa3b	3.26442e-123	0.519296	0.412	0.063	5.35821e-119	3	anxa3b
grhl1	2.27911e-122	0.251209	0.244	0.016	3.74093e-118	3	grhl1
psap	3.07275e-122	0.513843	0.867	0.724	5.04361e-118	1	psap
rpl23a	5.2518e-122	0.246797	1	0.997	8.62031e-118	0	rpl23a
rpl7	7.53903e-122	0.211443	1	1	1.23746e-117	0	rpl7
ponzr1	1.14536e-121	0.35058	0.998	0.977	1.87999e-117	1	ponzr1
six2a	1.26398e-121	0.200365	0.174	0.004	2.0747e-117	3	six2a
cyp26a1	4.27814e-121	0.516802	0.26	0.021	7.02214e-117	3	cyp26a1
foxj1a	5.2461e-121	0.375514	0.17	0.004	8.61095e-117	3	foxj1a
glula	5.88059e-121	0.493753	0.532	0.187	9.65241e-117	0	glula
msh6	7.87425e-121	0.430541	0.401	0.035	1.29248e-116	4	msh6
lrrn1	1.07134e-120	0.249595	0.207	0.01	1.7585e-116	3	lrrn1
rpl7a	1.83938e-120	0.216783	1	0.999	3.01915e-116	0	rpl7a
negr1	2.45398e-120	0.152121	0.145	0.001	4.02796e-116	3	negr1
aldoaa	2.47038e-120	0.400905	0.961	0.889	4.05489e-116	1	aldoaa
nxnl2	2.59051e-120	0.304436	0.373	0.085	4.25207e-116	0	nxnl2
krt15	6.33091e-120	0.57678	0.251	0.018	1.03916e-115	3	krt15
klf6a	6.51291e-120	0.795648	0.801	0.566	1.06903e-115	1	klf6a
oaz1a	6.94834e-120	0.43393	0.99	0.936	1.1405e-115	1	oaz1a
gas6	2.23675e-119	0.650931	0.465	0.163	3.67141e-115	1	gas6
rplp1	2.27028e-119	0.214435	1	1	3.72643e-115	0	rplp1
ms4a17a.5	3.12934e-119	0.259299	0.262	0.021	5.1365e-115	3	ms4a17a.5
nr2f2	4.6973e-119	0.673099	0.535	0.027	7.71014e-115	5	nr2f2
si:ch73-193i22.1	6.52161e-119	0.355514	0.513	0.18	1.07046e-114	0	si:ch73-193i22.1
nkd1	1.30713e-118	0.529378	0.469	0.095	2.14552e-114	3	nkd1
tubb2b1	1.89343e-118	0.751097	0.493	0.057	3.10788e-114	4	tubb2b
rps17	2.17549e-118	0.403013	0.946	0.807	3.57084e-114	0	rps17
arhgdig	3.2271e-118	0.379867	0.289	0.028	5.29696e-114	3	arhgdig
gsdf	5.87769e-118	0.597266	0.999	0.978	9.64763e-114	1	gsdf
rps9	5.96806e-118	0.217762	1	1	9.79597e-114	0	rps9
anxa2a1	1.06846e-117	0.947684	0.685	0.203	1.75378e-113	3	anxa2a
naca	6.00371e-117	0.243681	1	0.997	9.85448e-113	0	naca
hoxb5a	1.7061e-116	0.179141	0.172	0.005	2.80039e-112	3	hoxb5a
nansa	5.346e-116	0.514564	0.341	0.072	8.77493e-112	0	nansa
rpl8	1.74188e-115	0.20417	1	1	2.85912e-111	0	rpl8
lmo7a	4.20645e-115	0.201136	0.172	0.005	6.90447e-111	3	lmo7a
sat1a.1	4.28967e-115	0.353244	0.381	0.096	7.04107e-111	0	sat1a.1
si:busm1-266f07.2	5.41997e-115	0.882471	0.446	0.146	8.89634e-111	1	si:busm1-266f07.2
rpl18	8.47031e-115	0.220711	1	1	1.39032e-110	0	rpl18
col1a1a	8.53698e-115	0.362377	0.249	0.019	1.40126e-110	3	col1a1a
pleca	1.67944e-114	0.578408	0.458	0.093	2.75663e-110	3	pleca
epdl1	1.89494e-114	0.273647	0.262	0.023	3.11036e-110	3	epdl1
rps6	3.7294e-114	0.265393	0.998	0.985	6.12144e-110	0	rps6
atp2a3	6.49849e-114	0.212004	0.216	0.013	1.06666e-109	3	atp2a3
cd9a	8.53252e-114	0.311043	0.311	0.036	1.40053e-109	3	cd9a
rbfox1	6.41764e-113	0.23866	0.227	0.015	1.05339e-108	3	rbfox1
rps3	6.9691e-113	0.234242	1	0.997	1.14391e-108	0	rps3
CR383676.11	9.32958e-113	0.500936	1	1	1.53136e-108	3	CR383676.1
cd151	1.22024e-112	0.316623	0.24	0.018	2.0029e-108	3	cd151
si:dkey-188i13.9	4.08619e-112	0.458215	0.326	0.042	6.70707e-108	3	si:dkey-188i13.9
rps27a	7.73876e-112	0.182333	1	1	1.27024e-107	0	rps27a
prdx5	8.03254e-112	0.84799	0.667	0.233	1.31846e-107	3	prdx5
col6a2	3.05572e-111	0.313791	0.22	0.014	5.01566e-107	3	col6a2
tent5ba	3.30954e-111	0.527105	0.39	0.107	5.43228e-107	1	tent5ba
rsl24d1	3.58571e-111	0.391292	0.937	0.732	5.88558e-107	0	rsl24d1
nop53	6.82797e-111	0.425166	0.7	0.348	1.12074e-106	0	nop53
vcam1b	1.95878e-110	0.248659	0.187	0.008	3.21514e-106	3	vcam1b
wls	2.67738e-110	0.489895	0.396	0.066	4.39466e-106	3	wls
rpl3	3.18261e-110	0.273736	0.997	0.987	5.22393e-106	0	rpl3
flnb	3.79087e-109	0.188999	0.15	0.003	6.22233e-105	3	flnb
mafba	5.48216e-109	0.531264	0.582	0.246	8.99842e-105	0	mafba
spint2	1.78938e-108	0.272845	0.185	0.008	2.93708e-104	3	spint2
rsl1d1	2.29246e-108	0.420455	0.594	0.258	3.76284e-104	0	rsl1d1
socs3a	2.71965e-108	0.745499	0.915	0.801	4.46403e-104	1	socs3a
mfap2	5.96473e-108	0.633256	0.451	0.021	9.79051e-104	5	mfap2
gig2d	6.22439e-108	0.208535	0.154	0.004	1.02167e-103	3	gig2d
rps27.1	6.255e-108	0.226654	1	0.999	1.0267e-103	0	rps27.1
pcdh1b	7.41566e-108	0.176286	0.165	0.005	1.21721e-103	3	pcdh1b
atp5mc3b	8.63089e-108	0.298316	0.997	0.972	1.41667e-103	0	atp5mc3b
eef2b	9.49384e-108	0.309264	0.991	0.938	1.55832e-103	0	eef2b
rpl21	9.85229e-108	0.193733	1	1	1.61715e-103	0	rpl21
rps19	2.63619e-107	0.206168	1	1	4.32703e-103	0	rps19
erbb4b	3.88959e-107	0.137139	0.128	0.001	6.38437e-103	3	erbb4b
bambia	3.44048e-106	0.677324	0.697	0.465	5.64721e-102	1	bambia
ifi461	4.33342e-106	0.866993	0.925	0.579	7.11288e-102	3	ifi46
eef1a1l2	5.53998e-106	0.166878	1	1	9.09333e-102	0	eef1a1l2
si:ch73-158p21.3	5.99382e-106	0.318804	0.332	0.075	9.83825e-102	1	si:ch73-158p21.3
tnk2b	8.51007e-106	0.166493	0.161	0.005	1.39684e-101	3	tnk2b
rpl30	1.03492e-105	0.243578	0.999	0.994	1.69872e-101	0	rpl30
rack1	1.64631e-105	0.218718	1	0.999	2.70225e-101	0	rack1
rps16	2.34928e-105	0.193902	1	1	3.85611e-101	0	rps16
tuba8l3	2.47153e-105	0.265275	0.236	0.02	4.05676e-101	3	tuba8l3
ndrg4	2.78987e-105	0.207976	0.207	0.013	4.5793e-101	3	ndrg4
esr2a	3.21313e-105	0.452677	0.463	0.103	5.27403e-101	3	esr2a
rps14	3.85691e-105	0.180957	1	1	6.33074e-101	0	rps14
magi1b	6.30354e-105	0.463555	0.478	0.112	1.03466e-100	3	magi1b
aste1a	7.09894e-105	0.946485	0.559	0.165	1.16522e-100	3	aste1a
klhl41b	7.55765e-105	0.284481	0.393	0.112	1.24051e-100	0	klhl41b
b3gnt5a	9.45509e-105	0.242581	0.254	0.005	1.55196e-100	5	b3gnt5a
anxa5b	9.83993e-105	0.401935	0.328	0.045	1.61513e-100	3	anxa5b
lef1	1.10771e-104	0.399322	0.403	0.075	1.81819e-100	3	lef1
rps4x	2.02381e-104	0.22778	1	0.996	3.32188e-100	0	rps4x
foxp4	2.90579e-104	0.410323	0.814	0.495	4.76957e-100	0	foxp4
f8	2.55413e-103	0.142881	0.123	0.001	4.19235e-99	3	f8
agrn	2.85117e-103	0.536906	0.769	0.525	4.6799e-99	1	agrn
nsa2	5.69267e-103	0.404005	0.884	0.622	9.34394e-99	0	nsa2
kcnq1.1	5.70525e-103	0.182031	0.161	0.005	9.36459e-99	3	kcnq1.1
esr2b	7.27374e-103	0.34113	0.383	0.068	1.19391e-98	3	esr2b
rps18	9.79261e-103	0.270873	0.996	0.975	1.60736e-98	0	rps18
slc12a7b	2.86289e-102	0.674097	0.496	0.133	4.69915e-98	3	slc12a7b
faua	2.97741e-102	0.211721	1	0.999	4.88712e-98	0	faua
mxb	3.80278e-102	0.272752	0.214	0.015	6.24188e-98	3	mxb
mt-co2	5.00085e-102	0.169438	1	1	8.2084e-98	0	mt-co2
tyms	7.11531e-102	0.244829	0.198	0.007	1.16791e-97	4	tyms
dnajc9	1.79746e-101	0.383028	0.29	0.02	2.95036e-97	4	dnajc9
gins2	1.98225e-101	0.284339	0.208	0.008	3.25366e-97	4	gins2
parvab	2.10878e-101	0.242434	0.227	0.019	3.46136e-97	3	parvab
sp5a	4.44012e-101	0.142367	0.126	0.001	7.28802e-97	3	sp5a
cdh2	6.89606e-101	0.453833	0.445	0.097	1.13192e-96	3	cdh2
apln	7.57072e-101	0.178119	0.163	0.006	1.24266e-96	3	apln
dap1b1	3.91452e-100	0.470417	1	0.958	6.42529e-96	2	dap1b
f11r.1	5.1563e-100	0.535438	0.452	0.099	8.46354e-96	3	f11r.1
aldob	2.51191e-99	0.484866	0.712	0.385	4.12305e-95	0	aldob
pole4	5.07032e-99	0.373929	0.324	0.027	8.32243e-95	4	pole4
hsp70.2	5.5514e-99	0.704933	0.937	0.877	9.11207e-95	1	hsp70.2
foxo1a	1.9935e-98	0.408796	0.659	0.314	3.27213e-94	0	foxo1a
slc26a4	1.39524e-97	0.123612	0.117	0.001	2.29015e-93	3	slc26a4
ncam1a	2.91408e-97	0.143504	0.128	0.002	4.78318e-93	3	ncam1a
c4	3.22745e-97	0.315062	0.254	0.006	5.29753e-93	5	c4
cox6b2	6.6574e-97	0.361301	0.941	0.785	1.09275e-92	0	cox6b2
uba52	1.16685e-96	0.188945	1	1	1.91527e-92	0	uba52
st5	1.205e-96	0.59476	0.667	0.265	1.97789e-92	3	st5
flrt2.1	6.21446e-96	0.118015	0.112	0	1.02004e-91	3	flrt2.1
dnah2	1.78968e-95	0.188204	0.126	0.002	2.93759e-91	3	dnah2
fmnl3	1.98416e-95	0.291406	0.317	0.047	3.2568e-91	3	fmnl3
ddc	3.73383e-95	0.31851	0.225	0.029	6.1287e-91	0	ddc
cmah	1.12285e-94	0.289681	0.376	0.113	1.84305e-90	0	cmah
rps24	7.79802e-94	0.183153	1	1	1.27997e-89	0	rps24
eevs	2.04912e-93	0.128662	0.119	0.001	3.36342e-89	3	eevs
hey1	3.65374e-93	0.395105	0.416	0.146	5.99725e-89	0	hey1
lmo4a	3.72473e-93	0.222754	0.24	0.025	6.11377e-89	3	lmo4a
arhgap27l	7.88218e-93	0.161902	0.17	0.009	1.29378e-88	3	arhgap27l
wt1a	9.40478e-93	0.214668	0.222	0.021	1.5437e-88	3	wt1a
rpl27	9.71314e-93	0.203722	1	0.999	1.59431e-88	0	rpl27
zfp36l2	1.13531e-92	0.426977	0.284	0.039	1.8635e-88	3	zfp36l2
nfia	1.30549e-92	0.295832	0.319	0.05	2.14284e-88	3	nfia
si:ch211-195b15.8	1.54858e-92	0.38528	0.262	0.032	2.54183e-88	3	si:ch211-195b15.8
slc29a1a	3.36175e-92	0.648858	0.471	0.122	5.51797e-88	3	slc29a1a
rfc5	6.74319e-92	0.381671	0.411	0.05	1.10683e-87	4	rfc5
mapk8ip1a	7.49452e-92	0.154021	0.152	0.006	1.23015e-87	3	mapk8ip1a
ptbp3	9.50249e-92	0.324502	0.66	0.341	1.55974e-87	0	ptbp3
col28a2b	1.10721e-91	0.302964	0.411	0.139	1.81738e-87	0	col28a2b
flrt3	1.11313e-91	0.175265	0.156	0.007	1.82709e-87	3	flrt3
hsp70.1	1.31058e-91	0.706305	0.902	0.826	2.15119e-87	1	hsp70.1
adssl	6.28782e-91	0.550095	0.541	0.09	1.03208e-86	4	adssl
si:dkey-6i22.5	8.09882e-91	0.310543	0.28	0.022	1.32934e-86	4	si:dkey-6i22.5
rpl24	1.86904e-90	0.183864	1	1	3.06784e-86	0	rpl24
uhrf1	2.14682e-90	0.322953	0.386	0.044	3.52379e-86	4	uhrf1
gins4	3.29533e-90	0.265776	0.295	0.024	5.40895e-86	4	gins4
tuba1a	5.28616e-90	0.16758	0.137	0.004	8.6767e-86	3	tuba1a
fam184b	6.61743e-90	0.197591	0.187	0.013	1.08619e-85	3	fam184b
s100v21	8.40723e-90	0.740062	0.751	0.341	1.37996e-85	3	s100v2
acp6	9.37464e-90	0.257806	0.402	0.135	1.53875e-85	0	acp6
ddx21	1.08223e-89	0.378425	0.701	0.381	1.77638e-85	0	ddx21
rpl4	1.18241e-89	0.375869	0.885	0.687	1.94081e-85	0	rpl4
ppp1r9ba	1.65154e-89	0.267086	0.271	0.036	2.71084e-85	3	ppp1r9ba
postnb1	1.93773e-89	0.590273	0.507	0.033	3.18059e-85	5	postnb
b2m1	9.32354e-89	0.638623	0.998	0.829	1.53037e-84	3	b2m
rpl5b	1.92623e-88	0.288302	0.963	0.884	3.16172e-84	0	rpl5b
wnt11r	2.54071e-88	0.211154	0.183	0.003	4.17033e-84	5	wnt11r
mdka	2.54319e-88	0.457018	0.183	0.003	4.17439e-84	5	mdka
grna	2.73274e-88	0.299228	0.348	0.101	4.48552e-84	1	grna
adma	2.85255e-88	0.975235	0.479	0.03	4.68218e-84	5	adma
ttyh2	3.15597e-88	0.161828	0.156	0.008	5.18021e-84	3	ttyh2
ramp2	5.24254e-88	0.458388	0.427	0.161	8.6051e-84	1	ramp2
ppfibp1a	5.26391e-88	0.582003	0.507	0.144	8.64018e-84	3	ppfibp1a
prim2	7.33739e-88	0.286505	0.329	0.032	1.20436e-83	4	prim2
itga6a	1.8289e-87	0.221572	0.279	0.062	3.00195e-83	0	itga6a
ubr7	7.4335e-87	0.406842	0.425	0.056	1.22013e-82	4	ubr7
col4a1	2.66665e-86	0.315092	0.322	0.055	4.37703e-82	3	col4a1
ndrg3a	2.72106e-86	0.520069	0.436	0.111	4.46635e-82	3	ndrg3a
rrm1	4.29661e-86	0.377487	0.261	0.019	7.05246e-82	4	rrm1
col5a2a1	6.56599e-86	0.439302	0.394	0.02	1.07774e-81	5	col5a2a
si:ch211-253b8.5	6.68077e-86	0.147766	0.137	0.005	1.09658e-81	3	si:ch211-253b8.5
olfm1b	7.28436e-86	0.144017	0.108	0.001	1.19565e-81	3	olfm1b
fthl27	7.36434e-86	0.567207	0.987	0.864	1.20878e-81	3	fthl27
si:ch211-79k12.11	8.64041e-86	0.455183	0.504	0.14	1.41824e-81	3	si:ch211-79k12.1
si:dkeyp-75h12.5	1.08151e-85	0.431487	0.361	0.071	1.77519e-81	3	si:dkeyp-75h12.5
cavin1b1	1.42729e-85	0.693128	0.537	0.176	2.34275e-81	3	cavin1b
gtpbp4	2.70374e-85	0.365011	0.759	0.466	4.43792e-81	0	gtpbp4
cbx5	5.51565e-85	0.696803	0.85	0.247	9.05338e-81	4	cbx5
cldn11a	7.43909e-85	0.333607	0.996	0.972	1.22105e-80	1	cldn11a
kirrel1b	8.94959e-85	0.165101	0.183	0.003	1.46899e-80	5	kirrel1b
col6a21	1.2551e-84	0.443625	0.465	0.029	2.06012e-80	5	col6a2
irf8	1.47058e-84	0.235272	0.15	0.007	2.41381e-80	3	irf8
hsd3b1	1.50487e-84	0.262525	0.288	0.07	2.47009e-80	0	hsd3b1
znf703	1.66519e-84	0.230662	0.244	0.03	2.73325e-80	3	znf703
cxxc5a	1.79112e-84	0.409084	0.456	0.12	2.93994e-80	3	cxxc5a
mfap5	5.02169e-84	0.209713	0.183	0.014	8.24261e-80	3	mfap5
CR383676.1	8.454e-84	0.206462	1	1	1.38764e-79	1	CR383676.1
fbln5	3.32166e-83	0.34923	0.706	0.361	5.45218e-79	0	fbln5
zgc:92275	3.37888e-83	0.413535	0.426	0.17	5.54609e-79	1	zgc:92275
srpx	4.18281e-83	0.16343	0.15	0.008	6.86567e-79	3	srpx
jam2b1	4.53235e-83	0.737309	0.451	0.028	7.43941e-79	5	jam2b
pcdh19	7.23889e-83	0.12752	0.119	0.003	1.18819e-78	3	pcdh19
st14a	1.44667e-82	0.263604	0.229	0.027	2.37457e-78	3	st14a
sat1a.2	1.53193e-82	0.405492	0.812	0.514	2.51451e-78	0	sat1a.2
rpl39	1.59313e-82	0.207385	1	1	2.61496e-78	0	rpl39
serpinh1b	3.28789e-82	0.663609	0.341	0.066	5.39674e-78	3	serpinh1b
rps13	3.5729e-82	0.162186	1	1	5.86455e-78	0	rps13
rnaseh2a	4.0843e-82	0.306537	0.246	0.018	6.70397e-78	4	rnaseh2a
slc38a5b	5.32956e-82	0.339849	0.841	0.554	8.74794e-78	0	slc38a5b
si:ch211-195o20.7	5.42603e-82	0.1953	0.176	0.013	8.90629e-78	3	si:ch211-195o20.7
dut	5.703e-82	0.44136	0.266	0.022	9.3609e-78	4	dut
rps26l	8.9804e-82	0.198299	1	0.999	1.47404e-77	0	rps26l
slc1a3a	9.23698e-82	0.25023	0.466	0.189	1.51616e-77	0	slc1a3a
twist1a	9.74151e-82	0.176127	0.141	0.006	1.59897e-77	3	twist1a
cirbpb	1.10766e-81	0.448367	0.911	0.733	1.81811e-77	0	cirbpb
lzts2a	2.92972e-81	0.191257	0.196	0.018	4.80884e-77	3	lzts2a
tmem176	5.57075e-81	0.418257	0.423	0.025	9.14384e-77	5	tmem176
p4ha1b	6.98834e-81	0.358037	0.48	0.19	1.14707e-76	0	p4ha1b
rps15a	8.52492e-81	0.173258	1	1	1.39928e-76	0	rps15a
ccbe1	8.63517e-81	0.230797	0.254	0.055	1.41738e-76	1	ccbe1
hprt1	8.65797e-81	0.344877	0.722	0.391	1.42112e-76	0	hprt1
c2cd4a	1.06369e-80	0.150581	0.112	0.002	1.74594e-76	3	c2cd4a
jdp2b1	1.10356e-80	1.08164	0.912	0.595	1.81138e-76	3	jdp2b
serbp1a	1.39505e-80	0.255982	0.987	0.934	2.28983e-76	0	serbp1a
ppdpfa	1.92652e-80	0.301088	0.22	0.025	3.1622e-76	3	ppdpfa
ptmaa1	2.34962e-80	0.766795	0.925	0.609	3.85666e-76	3	ptmaa
rpl37.1	4.27036e-80	0.219965	1	1	7.00936e-76	0	rpl37.1
banf1	5.31032e-80	0.660116	0.696	0.174	8.71637e-76	4	banf1
rpl34	6.06144e-80	0.245999	0.996	0.98	9.94924e-76	0	rpl34
eif3ha	1.15115e-79	0.328727	0.662	0.351	1.8895e-75	0	eif3ha
pkp2	1.94573e-79	0.159946	0.167	0.012	3.19372e-75	3	pkp2
slc7a11	5.75506e-79	0.286275	0.652	0.339	9.44636e-75	0	slc7a11
zgc:112332	6.28163e-79	0.189996	0.175	0.019	1.03107e-74	0	zgc:112332
si:ch211-105j21.9	1.05275e-78	0.11417	0.121	0.004	1.72799e-74	3	si:ch211-105j21.9
ptprua	1.09682e-78	0.119768	0.121	0.004	1.80032e-74	3	ptprua
ccdc187	1.445e-78	0.336228	0.815	0.524	2.37182e-74	0	ccdc187
chd5	1.81054e-78	0.165165	0.161	0.011	2.97183e-74	3	chd5
acvrl1	2.5094e-78	0.152658	0.169	0.003	4.11894e-74	5	acvrl1
znf385a	3.03771e-78	0.104921	0.101	0.001	4.9861e-74	3	znf385a
sema7a	4.20803e-78	0.216926	0.301	0.083	6.90706e-74	0	sema7a
sec61g	8.20961e-78	0.368451	0.879	0.656	1.34753e-73	0	sec61g
atp1a3a	8.7281e-78	0.196638	0.217	0.038	1.43263e-73	0	atp1a3a
wu:fj16a03	9.90073e-78	0.396339	0.403	0.153	1.62511e-73	1	wu:fj16a03
htr1d	1.06551e-77	0.182793	0.183	0.016	1.74893e-73	3	htr1d
unc13ba	2.12436e-77	0.111528	0.112	0.003	3.48692e-73	3	unc13ba
smoc2	2.58796e-77	0.428816	0.75	0.553	4.24787e-73	1	smoc2
GPR139	3.62072e-77	0.198092	0.22	0.039	5.94306e-73	0	GPR139
zgc:92313	4.60611e-77	0.358734	0.275	0.044	7.56047e-73	3	zgc:92313
xirp2a	4.82198e-77	0.235844	0.288	0.078	7.9148e-73	0	xirp2a
pno1	6.44127e-77	0.329577	0.602	0.299	1.05727e-72	0	pno1
slit3	7.67363e-77	0.325477	0.413	0.164	1.25955e-72	1	slit3
vstm4a	7.7575e-77	0.175537	0.197	0.004	1.27332e-72	5	vstm4a
sumo3b	8.30995e-77	0.430099	0.396	0.055	1.36399e-72	4	sumo3b
rai14	1.58268e-76	0.183332	0.187	0.018	2.59781e-72	3	rai14
LO018188.1	1.59473e-76	0.1347	0.123	0.005	2.61759e-72	3	LO018188.1
tnfaip6	1.87588e-76	0.241187	0.225	0.006	3.07907e-72	5	tnfaip6
rab3db	2.35227e-76	0.175462	0.172	0.014	3.86102e-72	3	rab3db
egr2b	2.54651e-76	0.475324	0.358	0.12	4.17984e-72	0	egr2b
apof	2.88697e-76	0.209059	0.211	0.005	4.73868e-72	5	apof
ahcyl2	3.16541e-76	0.436573	0.465	0.139	5.1957e-72	3	ahcyl2
rdh10a	7.75043e-76	0.517823	0.304	0.057	1.27216e-71	3	rdh10a
hmga1a	8.71343e-76	0.765699	0.768	0.224	1.43022e-71	4	hmga1a
si:dkeyp-9d4.2	1.01973e-75	0.319556	0.302	0.055	1.67378e-71	3	si:dkeyp-9d4.2
enpp6	9.43512e-75	0.30487	0.375	0.137	1.54868e-70	1	enpp6
mis12	9.6637e-75	0.20544	0.232	0.018	1.5862e-70	4	mis12
klf13	1.19419e-74	0.185945	0.198	0.021	1.96014e-70	3	klf13
hey2	1.59384e-74	0.498565	0.632	0.43	2.61613e-70	1	hey2
fam107b	2.27867e-74	0.328355	0.249	0.038	3.74021e-70	3	fam107b
mao	2.74811e-74	0.182863	0.194	0.02	4.51075e-70	3	mao
nfe2l2a	3.58877e-74	0.496497	0.385	0.096	5.8906e-70	3	nfe2l2a
ccn11	6.70952e-74	0.908575	0.463	0.136	1.1013e-69	3	ccn1
mbnl3	8.65218e-74	0.501267	0.652	0.462	1.42017e-69	1	mbnl3
adh5	9.59957e-74	0.334491	0.568	0.278	1.57567e-69	0	adh5
clu	1.11219e-73	0.253267	0.22	0.044	1.82556e-69	1	clu
mafa	1.97912e-73	0.126099	0.115	0.004	3.24853e-69	3	mafa
shmt1	2.25616e-73	0.237466	0.203	0.013	3.70326e-69	4	shmt1
sgk494a	2.65338e-73	0.160687	0.178	0.023	4.35525e-69	0	sgk494a
tmsb4x	2.70461e-73	0.241039	1	0.997	4.43934e-69	1	tmsb4x
fosb1	2.73772e-73	0.901437	0.932	0.697	4.4937e-69	3	fosb
slc16a9b	2.98601e-73	0.229399	0.198	0.022	4.90123e-69	3	slc16a9b
csrp1a	4.03699e-73	0.361534	0.297	0.055	6.62632e-69	3	csrp1a
nfkbiab	4.5098e-73	0.702839	0.511	0.166	7.40238e-69	3	nfkbiab
efna1b	5.20882e-73	0.386896	0.479	0.224	8.54976e-69	0	efna1b
pfn1	5.23154e-73	0.556959	0.423	0.116	8.58705e-69	3	pfn1
tdh	1.13159e-72	0.336343	0.758	0.458	1.8574e-68	0	tdh
tmem200b	1.77348e-72	0.145423	0.145	0.01	2.91099e-68	3	tmem200b
fbrsl1	3.15382e-72	0.256836	0.45	0.195	5.17668e-68	0	fbrsl1
si:ch73-1a9.3	6.45119e-72	0.362683	0.889	0.842	1.0589e-67	1	si:ch73-1a9.3
lrwd1	7.47889e-72	0.195213	0.217	0.016	1.22759e-67	4	lrwd1
notum1b1	1.05737e-71	0.423957	0.324	0.016	1.73557e-67	5	notum1b
gfra3	1.16005e-71	0.20659	0.263	0.067	1.9041e-67	0	gfra3
nr0b1	2.16239e-71	0.378318	0.324	0.068	3.54935e-67	3	nr0b1
cldn11b	6.36324e-71	0.324714	0.481	0.227	1.04446e-66	1	cldn11b
snrpd1	9.49618e-71	0.573603	0.517	0.102	1.5587e-66	4	snrpd1
hsp70.3	1.52144e-70	0.622088	0.883	0.804	2.4973e-66	1	hsp70.3
bcam1	1.66434e-70	0.633717	0.941	0.708	2.73185e-66	3	bcam
rpl12	4.53882e-70	0.163847	1	0.999	7.45002e-66	0	rpl12
eif2s1b	4.71449e-70	0.29833	0.632	0.331	7.73837e-66	0	eif2s1b
nme2b.1	8.00339e-70	0.183733	0.999	0.998	1.31368e-65	0	nme2b.1
rrbp1a	8.17494e-70	0.286991	0.247	0.039	1.34183e-65	3	rrbp1a
chpt1	9.25128e-70	0.211115	0.32	0.105	1.51851e-65	0	chpt1
dag1	1.20794e-69	0.269837	0.969	0.863	1.98272e-65	0	dag1
slc31a2	1.68555e-69	0.236688	0.373	0.141	2.76667e-65	0	slc31a2
cct2.1	2.01677e-69	0.31364	0.593	0.305	3.31033e-65	0	cct2.1
eif3g	2.19677e-69	0.311839	0.803	0.539	3.60578e-65	0	eif3g
krt8	2.54371e-69	0.266879	0.948	0.905	4.17525e-65	1	krt8
pik3c2a	2.72615e-69	0.425815	0.504	0.177	4.47471e-65	3	pik3c2a
jun	4.13315e-69	0.43846	0.967	0.918	6.78416e-65	1	jun
si:rp71-36a1.1	5.54907e-69	0.41384	0.524	0.187	9.10824e-65	3	si:rp71-36a1.1
polr2b	6.61654e-69	0.343325	0.3	0.098	1.08604e-64	0	polr2b
pnrc21	7.05033e-69	0.754131	0.978	0.819	1.15724e-64	3	pnrc2
SERP1	1.10888e-68	0.284304	1	0.992	1.82012e-64	2	SERP1
rfc3	2.5303e-68	0.195582	0.179	0.011	4.15323e-64	4	rfc3
hmgb2b	3.52611e-68	0.753637	0.86	0.322	5.78776e-64	4	hmgb2b
mt-cyb	4.16879e-68	0.201544	1	1	6.84265e-64	2	mt-cyb
nr0b2a	5.52951e-68	0.12738	0.099	0.003	9.07614e-64	3	nr0b2a
hoxa3a	5.98635e-68	0.184253	0.2	0.025	9.82599e-64	3	hoxa3a
cygb1	7.99245e-68	0.469933	0.412	0.184	1.31188e-63	1	cygb1
cct4	8.14769e-68	0.311998	0.665	0.372	1.33736e-63	0	cct4
col5a11	8.23151e-68	0.586641	0.451	0.035	1.35112e-63	5	col5a1
isg151	1.10456e-67	1.07727	0.683	0.313	1.81303e-63	3	isg15
txnipa	1.16778e-67	0.438637	0.48	0.223	1.91679e-63	0	txnipa
ptprr	1.35692e-67	0.11076	0.106	0.004	2.22725e-63	3	ptprr
gli2a	1.42094e-67	0.104849	0.106	0.004	2.33233e-63	3	gli2a
etv4	3.08897e-67	0.226063	0.207	0.027	5.07023e-63	3	etv4
gadd45ba	3.49276e-67	0.602517	0.848	0.766	5.73302e-63	1	gadd45ba
eif3s6ip	3.70696e-67	0.290455	0.405	0.166	6.08461e-63	0	eif3s6ip
CR753876.1	6.75899e-67	0.38572	0.25	0.067	1.10942e-62	0	CR753876.1
actb1	7.29651e-67	0.473867	0.846	0.717	1.19765e-62	1	actb1
zfpm2a	8.46755e-67	0.130133	0.127	0.002	1.38986e-62	5	zfpm2a
rpl14	1.09345e-66	0.175882	1	0.998	1.79478e-62	0	rpl14
epha4a	1.65037e-66	0.12627	0.132	0.008	2.70891e-62	3	epha4a
dhrs9	1.83288e-66	0.122884	0.112	0.005	3.00848e-62	3	dhrs9
sox9b	2.3415e-66	0.137623	0.128	0.008	3.84334e-62	3	sox9b
litaf	3.82167e-66	0.357732	0.346	0.082	6.27288e-62	3	litaf
ppiaa1	3.986e-66	0.515054	0.963	0.771	6.54261e-62	3	ppiaa
mkxa	4.28602e-66	0.149674	0.156	0.019	7.03507e-62	0	mkxa
arrdc3b	5.36986e-66	0.43996	0.271	0.051	8.8141e-62	3	arrdc3b
prim1	6.23695e-66	0.123731	0.101	0.002	1.02373e-61	4	prim1
col5a1	6.47696e-66	0.282263	0.194	0.024	1.06313e-61	3	col5a1
mycn	7.96719e-66	0.319461	0.324	0.113	1.30773e-61	1	mycn
cx43	8.83826e-66	0.341427	0.73	0.446	1.45071e-61	0	cx43
nuak1b	9.65926e-66	0.150897	0.152	0.013	1.58547e-61	3	nuak1b
podxl1	1.08964e-65	1.47126	0.845	0.158	1.78854e-61	5	podxl
plxnb1a	1.2132e-65	0.295693	0.253	0.043	1.99134e-61	3	plxnb1a
rhbdl3	1.29792e-65	0.104408	0.093	0.002	2.13041e-61	3	rhbdl3
pcdh10b	1.38825e-65	0.153824	0.141	0.002	2.27868e-61	5	pcdh10b
cfl2	3.25249e-65	0.320049	0.499	0.26	5.33865e-61	1	cfl2
ntd5	9.05607e-65	0.385884	0.352	0.022	1.48646e-60	5	ntd5
igfbp1a	9.42712e-65	0.278183	0.097	0.003	1.54737e-60	3	igfbp1a
kank2	1.00221e-64	0.151683	0.167	0.017	1.64503e-60	3	kank2
col4a6	1.06891e-64	0.381142	0.789	0.69	1.75451e-60	1	col4a6
yap1	1.24165e-64	0.420018	0.526	0.202	2.03804e-60	3	yap1
si:dkey-7j14.6	1.30927e-64	0.339297	0.792	0.7	2.14903e-60	1	si:dkey-7j14.6
gpx1b	2.40501e-64	0.161036	0.152	0.014	3.94759e-60	3	gpx1b
tirap	3.23132e-64	0.166532	0.21	0.046	5.3039e-60	0	tirap
calm3a	3.38042e-64	0.640971	0.689	0.347	5.54863e-60	3	calm3a
znf536	3.4827e-64	0.400979	0.647	0.427	5.71651e-60	1	znf536
rpz51	6.23832e-64	0.620617	0.991	0.948	1.02396e-59	3	rpz5
ppm1g	9.87655e-64	0.460605	0.502	0.106	1.62114e-59	4	ppm1g
pdgfbb	1.38087e-63	0.106823	0.099	0.003	2.26656e-59	3	pdgfbb
vbp1	1.90767e-63	0.261508	0.346	0.127	3.13125e-59	0	vbp1
c6	5.09892e-63	0.14077	0.155	0.003	8.36937e-59	5	c6
col5a2a	5.14207e-63	0.152441	0.145	0.012	8.44019e-59	3	col5a2a
zgc:174863	6.43005e-63	0.335884	0.915	0.864	1.05543e-58	1	zgc:174863
rpl28	7.41555e-63	0.141927	1	1	1.21719e-58	0	rpl28
rbfox3a	7.9903e-63	0.139249	0.134	0.01	1.31153e-58	3	rbfox3a
itga5	1.46809e-62	0.256552	0.362	0.142	2.40972e-58	1	itga5
fhl3a	1.5452e-62	0.204914	0.33	0.122	2.53629e-58	0	fhl3a
hsp70l	1.64447e-62	0.817493	0.66	0.505	2.69923e-58	1	hsp70l
rpl6	2.23567e-62	0.314795	0.866	0.68	3.66964e-58	0	rpl6
dbn1	2.63117e-62	0.208869	0.209	0.031	4.3188e-58	3	dbn1
dmxl2	2.99821e-62	0.18494	0.181	0.022	4.92126e-58	3	dmxl2
apoa1a	3.54301e-62	0.202193	0.173	0.029	5.81549e-58	0	apoa1a
vegfd	3.68942e-62	0.163935	0.169	0.004	6.05581e-58	5	vegfd
col4a5	4.32292e-62	0.342455	0.871	0.774	7.09564e-58	1	col4a5
si:ch1073-291c23.21	5.39007e-62	0.349813	0.408	0.031	8.84726e-58	5	si:ch1073-291c23.2
si:ch1073-303k11.2	6.87345e-62	0.104151	0.088	0.002	1.12821e-57	3	si:ch1073-303k11.2
im:7151449	8.4672e-62	0.107259	0.108	0.005	1.38981e-57	3	im:7151449
aplp1	1.00747e-61	0.16461	0.159	0.016	1.65366e-57	3	aplp1
lrrc17	1.76813e-61	0.182252	0.152	0.015	2.90221e-57	3	lrrc17
her15.1	1.94102e-61	0.835416	0.329	0.125	3.18599e-57	0	her15.1
pkma	1.94961e-61	0.390358	0.745	0.649	3.20009e-57	1	pkma
smad3a	2.19598e-61	0.24995	0.306	0.069	3.60448e-57	3	smad3a
adamtsl2	2.793e-61	0.150997	0.179	0.033	4.58442e-57	0	adamtsl2
sytl2b	2.93921e-61	0.147655	0.155	0.022	4.82442e-57	0	sytl2b
ism1	3.31356e-61	0.219196	0.197	0.006	5.43888e-57	5	ism1
aqp12	4.01795e-61	0.245721	0.28	0.09	6.59507e-57	1	aqp12
TENM3	5.46384e-61	0.122267	0.117	0.007	8.96834e-57	3	TENM3
pold1	6.10452e-61	0.139165	0.106	0.003	1.002e-56	4	pold1
basp1	7.16486e-61	0.284833	0.596	0.335	1.17604e-56	0	basp1
cnnm2b	7.29645e-61	0.213063	0.394	0.164	1.19764e-56	0	cnnm2b
atad2	9.26721e-61	0.215798	0.227	0.022	1.52112e-56	4	atad2
jpt1b	1.12271e-60	0.515227	0.432	0.14	1.84281e-56	3	jpt1b
rpl36	1.14408e-60	0.198221	1	0.995	1.87789e-56	0	rpl36
cox5aa	1.55538e-60	0.318716	0.755	0.472	2.553e-56	0	cox5aa
slc35f2	1.99296e-60	0.516321	0.593	0.415	3.27125e-56	1	slc35f2
fibinb	2.19006e-60	0.230834	0.183	0.005	3.59476e-56	5	fibinb
tspan18b1	2.28713e-60	0.391702	0.423	0.125	3.75409e-56	3	tspan18b
tagln	2.88721e-60	0.811806	0.296	0.016	4.73907e-56	5	tagln
hspa8	3.20263e-60	0.371568	0.864	0.656	5.2568e-56	0	hspa8
b3glctb	4.20845e-60	0.10044	0.086	0.002	6.90774e-56	3	b3glctb
slc29a4	5.21015e-60	0.102547	0.106	0.005	8.55194e-56	3	slc29a4
narf	5.4461e-60	0.2148	0.358	0.147	8.93923e-56	0	narf
orc5	8.14231e-60	0.24743	0.295	0.039	1.33648e-55	4	orc5
mhc2dab	9.85867e-60	0.37413	0.263	0.081	1.6182e-55	1	mhc2dab
lypd6	1.00528e-59	0.161138	0.213	0.052	1.65007e-55	0	lypd6
klf2a	1.24633e-59	0.460502	0.211	0.008	2.04573e-55	5	klf2a
kif19	1.47172e-59	0.11238	0.108	0.006	2.41568e-55	3	kif19
rpl36a	1.49301e-59	0.168212	1	0.999	2.45062e-55	0	rpl36a
hic1	1.81298e-59	0.165101	0.141	0.003	2.97582e-55	5	hic1
pim1	1.90453e-59	0.621382	0.6	0.428	3.1261e-55	1	pim1
fibina	2.27613e-59	0.128733	0.141	0.003	3.73605e-55	5	fibina
plk2b	2.39213e-59	0.200328	0.2	0.046	3.92644e-55	1	plk2b
rps25	2.4689e-59	0.151647	1	0.999	4.05245e-55	0	rps25
net1	2.80074e-59	0.238827	0.587	0.3	4.59713e-55	0	net1
eif3k	3.19267e-59	0.270646	0.586	0.315	5.24045e-55	0	eif3k
add3b	4.38406e-59	0.126015	0.128	0.01	7.19599e-55	3	add3b
gpr22a	5.42795e-59	0.146846	0.119	0.008	8.90943e-55	3	gpr22a
UBB	6.29826e-59	0.750327	0.592	0.447	1.0338e-54	1	UBB
egr1	6.99817e-59	0.315488	0.816	0.579	1.14868e-54	0	egr1
col4a2	1.02547e-58	0.244482	0.26	0.052	1.68321e-54	3	col4a2
eppk1	1.213e-58	0.390342	0.449	0.153	1.99103e-54	3	eppk1
mt-co21	2.09695e-58	0.172532	1	1	3.44194e-54	2	mt-co2
sdcbp2	2.32389e-58	0.567374	0.687	0.377	3.81444e-54	3	sdcbp2
colec12	3.93445e-58	0.242867	0.282	0.015	6.45801e-54	5	colec12
usp43b	3.97879e-58	0.166322	0.17	0.021	6.53079e-54	3	usp43b
lama5	5.07219e-58	0.450204	0.683	0.543	8.32549e-54	1	lama5
snu13b	5.84247e-58	0.578337	0.657	0.185	9.58984e-54	4	snu13b
si:dkey-238i5.2	1.19672e-57	0.212111	0.251	0.049	1.9643e-53	3	si:dkey-238i5.2
htr1fa	1.22736e-57	0.12542	0.136	0.016	2.01459e-53	0	htr1fa
map2k1	1.33268e-57	0.298553	0.344	0.093	2.18747e-53	3	map2k1
si:ch73-217n20.1	1.57268e-57	0.238213	0.586	0.321	2.58139e-53	0	si:ch73-217n20.1
nup37	1.64574e-57	0.210242	0.164	0.011	2.70131e-53	4	nup37
npm1a	1.76909e-57	0.332106	0.616	0.348	2.90379e-53	0	npm1a
atp5mc11	1.78447e-57	0.692158	0.816	0.306	2.92903e-53	4	atp5mc1
sulf1	1.93279e-57	0.197662	0.185	0.026	3.17248e-53	3	sulf1
zgc:158689	2.02391e-57	0.1328	0.135	0.016	3.32204e-53	0	zgc:158689
arrdc3a	2.42513e-57	0.35683	0.767	0.541	3.98061e-53	0	arrdc3a
CT027638.1	2.76833e-57	1.05375	0.436	0.158	4.54394e-53	3	CT027638.1
tfr1a	4.13706e-57	0.191727	0.335	0.131	6.79058e-53	0	tfr1a
sort1a	4.27643e-57	0.222065	0.704	0.428	7.01933e-53	0	sort1a
appa1	5.62877e-57	0.353156	0.985	0.93	9.23907e-53	2	appa
foxo3b	6.43523e-57	0.207364	0.264	0.085	1.05628e-52	1	foxo3b
lgals9l3	6.69509e-57	0.363972	0.425	0.142	1.09893e-52	3	lgals9l3
tbx2a	9.17267e-57	0.176702	0.141	0.003	1.5056e-52	5	tbx2a
zgc:193505	1.02149e-56	0.143576	0.101	0.005	1.67667e-52	3	zgc:193505
oaz1a1	1.64862e-56	0.360207	0.984	0.947	2.70604e-52	2	oaz1a
rpl31	1.6839e-56	0.15922	1	1	2.76395e-52	0	rpl31
CU459094.2	1.70702e-56	0.1642	0.15	0.016	2.80191e-52	3	CU459094.2
axin2	3.61656e-56	0.321377	0.396	0.124	5.93623e-52	3	axin2
prrg2	4.2957e-56	0.157911	0.134	0.012	7.05096e-52	3	prrg2
nutf2l	4.59644e-56	0.4788	0.319	0.05	7.5446e-52	4	nutf2l
slc43a3b	5.16941e-56	0.456313	0.519	0.323	8.48508e-52	1	slc43a3b
si:ch211-250c4.4	5.92014e-56	0.278131	0.454	0.227	9.71731e-52	1	si:ch211-250c4.4
h2afvb1	6.06711e-56	0.616316	0.662	0.2	9.95855e-52	4	h2afvb
ivns1abpb	7.19856e-56	0.256277	0.222	0.023	1.18157e-51	4	ivns1abpb
rtn4a	9.94853e-56	0.458103	0.594	0.441	1.63295e-51	1	rtn4a
fbl	1.19017e-55	0.538446	0.758	0.244	1.95355e-51	4	fbl
zgc:92606	1.54287e-55	0.442004	0.445	0.154	2.53246e-51	3	zgc:92606
has2	1.70579e-55	0.1292	0.128	0.014	2.79988e-51	0	has2
ktn1	2.18083e-55	0.308227	0.423	0.211	3.57961e-51	1	ktn1
myo1ea	2.27678e-55	0.182756	0.298	0.108	3.73711e-51	0	myo1ea
man2c1	2.67919e-55	0.15855	0.213	0.056	4.39762e-51	0	man2c1
ube2t	2.79735e-55	0.126533	0.101	0.003	4.59157e-51	4	ube2t
jdp2b	3.05833e-55	0.575919	0.743	0.577	5.01994e-51	1	jdp2b
epha2a	3.25985e-55	0.125507	0.123	0.01	5.35072e-51	3	epha2a
soul5	4.04605e-55	0.104266	0.104	0.006	6.64119e-51	3	soul5
msh2	4.34241e-55	0.167748	0.135	0.007	7.12764e-51	4	msh2
notum1b	4.41791e-55	0.151498	0.121	0.01	7.25155e-51	3	notum1b
zgc:1037001	6.12858e-55	0.628371	0.584	0.243	1.00595e-50	3	zgc:103700
myo1ca	6.81954e-55	0.23142	0.282	0.064	1.11936e-50	3	myo1ca
ldlrap1a	9.6295e-55	0.267424	0.196	0.031	1.58059e-50	3	ldlrap1a
caskin1	1.00792e-54	0.252758	0.282	0.016	1.6544e-50	5	caskin1
rca2.1	1.08942e-54	0.261795	0.264	0.057	1.78818e-50	3	rca2.1
sdk1a	1.16517e-54	0.202237	0.52	0.27	1.91251e-50	0	sdk1a
ywhah	1.51146e-54	0.284199	0.317	0.082	2.48091e-50	3	ywhah
pabpc1a	1.59617e-54	0.273004	0.897	0.717	2.61995e-50	0	pabpc1a
BX908803.2	1.72077e-54	0.124249	0.149	0.024	2.82447e-50	0	BX908803.2
bcam	1.78955e-54	0.324727	0.808	0.698	2.93738e-50	1	bcam
pigr	1.81633e-54	0.100314	0.101	0.006	2.98132e-50	3	pigr
vegfaa	2.65752e-54	0.284039	0.486	0.263	4.36206e-50	1	vegfaa
atp1a1a.11	2.7087e-54	0.408956	0.887	0.799	4.44606e-50	2	atp1a1a.1
lrch4	2.97157e-54	0.166645	0.187	0.028	4.87754e-50	3	lrch4
CABZ01068358.1	2.97411e-54	0.38551	0.729	0.621	4.88171e-50	1	CABZ01068358.1
si:ch211-222l21.11	4.71671e-54	0.562652	0.599	0.156	7.742e-50	4	si:ch211-222l21.1
lamb1b	1.07008e-53	0.13657	0.156	0.019	1.75642e-49	3	lamb1b
apex1	1.55162e-53	0.382809	0.396	0.077	2.54682e-49	4	apex1
tmem176l.1	1.55987e-53	0.417625	0.621	0.47	2.56037e-49	1	tmem176l.1
glud1a	2.00299e-53	0.394815	0.407	0.132	3.2877e-49	3	glud1a
slc5a6b	2.20885e-53	0.161431	0.214	0.059	3.6256e-49	0	slc5a6b
galr2b	4.08806e-53	0.107616	0.112	0.008	6.71013e-49	3	galr2b
si:dkey-16l2.20	4.58923e-53	0.350727	0.3	0.115	7.53276e-49	1	si:dkey-16l2.20
aamp	6.89268e-53	0.229594	0.381	0.163	1.13136e-48	0	aamp
cav21	7.68697e-53	0.310837	0.452	0.156	1.26174e-48	3	cav2
pik3ip1	8.75469e-53	0.504302	0.77	0.632	1.437e-48	2	pik3ip1
ptgs2a	1.0515e-52	0.290885	0.283	0.104	1.72594e-48	1	ptgs2a
slc16a10	1.0667e-52	0.203417	0.189	0.03	1.75088e-48	3	slc16a10
zgc:152658	1.57897e-52	0.169318	0.185	0.029	2.59172e-48	3	zgc:152658
cct6a	2.00822e-52	0.245727	0.577	0.317	3.2963e-48	0	cct6a
folr1	2.01162e-52	0.626084	0.729	0.24	3.30188e-48	4	folr
msna	2.06195e-52	0.392342	0.696	0.604	3.38449e-48	1	msna
her2	2.16585e-52	0.611626	0.665	0.47	3.55503e-48	0	her2
tomm5	3.10097e-52	0.245986	0.51	0.266	5.08994e-48	0	tomm5
tmem981	3.29697e-52	0.295651	0.394	0.034	5.41164e-48	5	tmem98
ivns1abpa1	3.6617e-52	0.327942	0.993	0.919	6.01032e-48	2	ivns1abpa
pcdh10a	3.70931e-52	0.16628	0.2	0.052	6.08846e-48	1	pcdh10a
seta	3.84799e-52	0.561981	0.884	0.367	6.31609e-48	4	seta
cd99	3.95668e-52	0.41031	0.388	0.126	6.4945e-48	3	cd99
tppp3	4.0732e-52	0.116989	0.07	0.001	6.68574e-48	3	tppp3
scn4bb	4.20565e-52	0.206096	0.218	0.041	6.90315e-48	3	scn4bb
ola1	4.44775e-52	0.255267	0.643	0.376	7.30054e-48	0	ola1
slc25a51	5.51502e-52	0.219056	1	1	9.05235e-48	2	slc25a5
ctss2.2	6.39783e-52	0.103227	0.115	0.009	1.05014e-47	3	ctss2.2
iqsec1b	6.39831e-52	0.156158	0.198	0.052	1.05022e-47	0	iqsec1b
sh2d3cb	6.90352e-52	0.190256	0.337	0.142	1.13314e-47	0	sh2d3cb
hmgn3	7.25465e-52	0.296455	0.443	0.227	1.19078e-47	1	hmgn3
ybx1	8.15281e-52	0.195315	0.986	0.961	1.3382e-47	0	ybx1
mgat4b	1.0475e-51	0.174166	0.278	0.101	1.71936e-47	0	mgat4b
phlda21	1.04916e-51	0.547216	0.874	0.761	1.72209e-47	1	phlda2
tert	1.05696e-51	0.160374	0.179	0.016	1.73489e-47	4	tert
itga9	1.44767e-51	0.28241	0.461	0.246	2.37621e-47	1	itga9
glo1	1.45349e-51	0.279241	0.262	0.059	2.38576e-47	3	glo1
tuba8l	1.71034e-51	0.44374	0.604	0.17	2.80736e-47	4	tuba8l
hsd17b1	2.26283e-51	0.222478	0.979	0.845	3.71421e-47	0	hsd17b1
rplp11	2.30704e-51	0.190273	1	1	3.78678e-47	2	rplp1
ponzr11	2.68936e-51	0.276841	0.996	0.981	4.41431e-47	2	ponzr1
plekha6	2.76307e-51	0.278236	0.499	0.282	4.5353e-47	1	plekha6
afap1	3.06784e-51	0.102803	0.097	0.006	5.03556e-47	3	afap1
agrn1	3.65904e-51	0.49482	0.872	0.569	6.00595e-47	3	agrn
jam2a	4.2182e-51	0.210506	0.652	0.36	6.92375e-47	0	jam2a
cd82a	4.65901e-51	0.208609	0.367	0.167	7.6473e-47	0	cd82a
col6a3	4.68452e-51	0.187338	0.126	0.012	7.68918e-47	3	col6a3
klf12a	6.77587e-51	0.201696	0.238	0.05	1.11219e-46	3	klf12a
tnika	7.8283e-51	0.24569	0.448	0.218	1.28494e-46	0	tnika
fosl2	9.87395e-51	0.259869	0.295	0.076	1.62071e-46	3	fosl2
znfx1	1.14454e-50	0.187365	0.185	0.03	1.87865e-46	3	znfx1
AL954191.1	1.30348e-50	0.234093	0.127	0.003	2.13953e-46	5	AL954191.1
zgc:154093	1.32755e-50	0.12947	0.148	0.027	2.17904e-46	0	zgc:154093
comta	1.5977e-50	0.173234	0.338	0.142	2.62246e-46	0	comta
pdgfra1	2.29816e-50	0.421264	0.909	0.684	3.77221e-46	2	pdgfra
mfap51	2.70528e-50	0.385191	0.338	0.027	4.44045e-46	5	mfap5
npm1a1	3.39877e-50	0.632563	0.894	0.424	5.57875e-46	4	npm1a
si:dkey-16l2.201	3.52651e-50	0.438228	0.421	0.143	5.78842e-46	3	si:dkey-16l2.20
col8a1a	4.28231e-50	0.134942	0.128	0.013	7.02899e-46	3	col8a1a
capn2b	5.21362e-50	0.23018	0.286	0.073	8.55763e-46	3	capn2b
eif3ea	7.0493e-50	0.250834	0.759	0.509	1.15707e-45	0	eif3ea
sub1a	1.38213e-49	0.554625	0.836	0.338	2.26863e-45	4	sub1a
anxa2a	1.63125e-49	0.559923	0.388	0.193	2.67753e-45	1	anxa2a
si:ch211-212k18.6	1.88121e-49	0.11848	0.141	0.024	3.08781e-45	0	si:ch211-212k18.6
abtb2b	1.95815e-49	0.130211	0.161	0.034	3.2141e-45	0	abtb2b
fosab	2.38427e-49	0.352227	0.979	0.944	3.91354e-45	1	fosab
anp32b	3.99667e-49	0.413447	0.58	0.162	6.56013e-45	4	anp32b
si:ch211-217k17.7	4.6489e-49	0.231132	0.331	0.138	7.63071e-45	0	si:ch211-217k17.7
si:ch211-161h7.4	5.4096e-49	0.235989	0.275	0.042	8.87932e-45	4	si:ch211-161h7.4
dkc1	6.57995e-49	0.506469	0.643	0.207	1.08003e-44	4	dkc1
anxa1a1	8.08157e-49	0.812126	0.563	0.074	1.32651e-44	5	anxa1a
xaf1	8.14075e-49	0.332129	0.363	0.116	1.33622e-44	3	xaf1
cishb	8.17862e-49	0.266756	0.39	0.182	1.34244e-44	0	cishb
eif3s10	8.33427e-49	0.241002	0.48	0.248	1.36799e-44	0	eif3s10
fam171a2a	8.40469e-49	0.14264	0.17	0.026	1.37955e-44	3	fam171a2a
tmsb11	8.68161e-49	0.715612	0.811	0.503	1.425e-44	3	tmsb1
klf6a1	9.77418e-49	0.654388	0.912	0.607	1.60433e-44	3	klf6a
asap3	1.43951e-48	0.118761	0.132	0.015	2.36281e-44	3	asap3
raraa	2.99414e-48	0.166894	0.178	0.029	4.91458e-44	3	raraa
boc1	3.18213e-48	0.599693	0.648	0.108	5.22314e-44	5	boc
cd74a1	4.04454e-48	0.677381	0.888	0.541	6.63872e-44	3	cd74a
rgs16	4.18904e-48	0.107848	0.075	0.003	6.87589e-44	3	rgs16
spry4	4.69611e-48	0.280926	0.194	0.035	7.70819e-44	3	spry4
rbp4	5.06111e-48	0.580431	0.141	0.004	8.30731e-44	5	rbp4
mgst1.1	5.24594e-48	0.225112	0.291	0.077	8.61069e-44	3	mgst1.1
hsd11b2	5.26023e-48	0.795242	0.432	0.178	8.63414e-44	3	hsd11b2
rnaseh2c	5.66593e-48	0.200708	0.174	0.016	9.30005e-44	4	rnaseh2c
ier2b	5.92987e-48	0.27445	0.877	0.677	9.73329e-44	0	ier2b
F7 (1 of many)	8.57042e-48	0.237492	0.26	0.062	1.40675e-43	3	F7 (1 of many)
cav2	9.03604e-48	0.245705	0.312	0.131	1.48318e-43	1	cav2
cct7	1.24479e-47	0.248081	0.653	0.403	2.0432e-43	0	cct7
rps26	1.55287e-47	0.169455	0.996	0.991	2.54888e-43	0	rps26
h3f3a	1.62128e-47	0.593746	0.71	0.238	2.66116e-43	4	h3f3a
dusp8a	1.84948e-47	0.169435	0.181	0.03	3.03574e-43	3	dusp8a
rgs18	1.88427e-47	0.145429	0.215	0.066	3.09284e-43	0	rgs18
tuba8l42	2.72044e-47	0.683353	0.889	0.403	4.46533e-43	4	tuba8l4
notch31	3.42265e-47	0.295311	0.996	0.933	5.61794e-43	2	notch3
hpca	3.66581e-47	0.130388	0.134	0.016	6.01706e-43	3	hpca
krt941	3.69035e-47	0.955904	0.62	0.092	6.05734e-43	5	krt94
glulb1	5.10017e-47	0.281712	1	0.952	8.37141e-43	2	glulb
klf11b	5.34909e-47	0.497758	0.471	0.198	8.78e-43	3	klf11b
pdgfd	5.41235e-47	0.151574	0.165	0.025	8.88383e-43	3	pdgfd
aif1l	6.41096e-47	0.412026	0.582	0.446	1.0523e-42	1	aif1l
pola1	7.16324e-47	0.248404	0.271	0.042	1.17577e-42	4	pola1
si:dkey-195m11.8	7.20144e-47	0.112884	0.112	0.01	1.18204e-42	3	si:dkey-195m11.8
cdca7b	9.0933e-47	0.264841	0.193	0.021	1.49257e-42	4	cdca7b
lmnb2	9.3297e-47	0.358063	0.541	0.158	1.53138e-42	4	lmnb2
tcp1	9.34237e-47	0.235884	0.58	0.33	1.53346e-42	0	tcp1
cct5	1.02778e-46	0.241997	0.519	0.282	1.687e-42	0	cct5
eef1da	1.03281e-46	0.279385	0.753	0.512	1.69525e-42	0	eef1da
rps15	1.08444e-46	0.121304	1	1	1.77999e-42	0	rps15
ihhb	1.25823e-46	0.111603	0.135	0.024	2.06525e-42	0	ihhb
kcnj19b	1.29857e-46	0.153277	0.23	0.077	2.13148e-42	0	kcnj19b
pole	1.36447e-46	0.139686	0.159	0.014	2.23964e-42	4	pole
pim11	1.90276e-46	0.66266	0.742	0.451	3.12319e-42	3	pim1
tmem258	1.98714e-46	0.327272	0.322	0.094	3.26169e-42	3	tmem258
cldn5a1	2.23406e-46	0.355292	0.476	0.194	3.66699e-42	3	cldn5a
prmt1	2.25783e-46	0.477589	0.609	0.185	3.706e-42	4	prmt1
aldh1a2	2.52574e-46	0.406661	0.638	0.489	4.14575e-42	1	aldh1a2
colec11	2.5471e-46	0.247958	0.795	0.537	4.1808e-42	0	colec11
gse1	2.67186e-46	0.140417	0.161	0.024	4.38559e-42	3	gse1
si:ch211-198c19.3	2.98163e-46	0.121192	0.115	0.011	4.89405e-42	3	si:ch211-198c19.3
il17rd	3.16504e-46	0.140006	0.176	0.03	5.1951e-42	3	il17rd
tcf12	4.16793e-46	0.253247	0.553	0.315	6.84124e-42	0	tcf12
tomm20b	4.22513e-46	0.218826	0.483	0.253	6.93512e-42	0	tomm20b
gmds1	4.40646e-46	0.983081	0.768	0.355	7.23276e-42	4	gmds
grb10a	4.63097e-46	0.331255	0.412	0.152	7.60127e-42	3	grb10a
pdia21	5.10852e-46	0.758255	0.643	0.225	8.38512e-42	4	pdia2
postnb	7.68193e-46	0.184453	0.165	0.026	1.26091e-41	3	postnb
ssrp1a	9.37759e-46	0.236812	0.237	0.032	1.53924e-41	4	ssrp1a
mt-co1	1.10072e-45	0.161992	1	1	1.80673e-41	2	mt-co1
tmcc3	1.20175e-45	0.160632	0.174	0.03	1.97255e-41	3	tmcc3
vim	1.44628e-45	0.161513	0.13	0.015	2.37392e-41	3	vim
RPS17	2.18355e-45	0.134323	1	0.999	3.58408e-41	0	RPS17
col6a11	2.1977e-45	0.472874	0.352	0.031	3.60731e-41	5	col6a1
vdac2	2.22798e-45	0.260686	0.795	0.591	3.657e-41	0	vdac2
zfand5b	2.29519e-45	0.265321	0.395	0.187	3.76733e-41	0	zfand5b
myl9a	2.36089e-45	0.300645	0.761	0.687	3.87516e-41	1	myl9a
zgc:113054	2.65441e-45	0.164019	0.172	0.029	4.35695e-41	3	zgc:113054
lmbr1l	2.77412e-45	0.12225	0.137	0.017	4.55345e-41	3	lmbr1l
atp2b41	3.3561e-45	0.386838	0.487	0.198	5.5087e-41	3	atp2b4
cpamd8	3.37361e-45	0.110622	0.126	0.021	5.53744e-41	0	cpamd8
fosb	3.40091e-45	0.329026	0.816	0.679	5.58225e-41	1	fosb
foxl2a	4.56561e-45	0.283052	0.446	0.254	7.49399e-41	1	foxl2a
hdlbpa	4.6386e-45	0.288159	0.256	0.063	7.61381e-41	3	hdlbpa
fkbp1b	4.98879e-45	0.229678	0.423	0.211	8.18859e-41	1	fkbp1b
si:ch211-79k12.1	5.27352e-45	0.21945	0.301	0.124	8.65595e-41	1	si:ch211-79k12.1
cox8b	5.9492e-45	0.227726	0.209	0.043	9.76502e-41	3	cox8b
si:ch73-380l3.4	6.61515e-45	0.259307	0.326	0.1	1.08581e-40	3	si:ch73-380l3.4
pim2	7.38923e-45	0.491325	0.434	0.27	1.21287e-40	1	pim2
nansa1	1.11676e-44	0.540356	0.531	0.153	1.83305e-40	4	nansa
gne1	1.14914e-44	0.542172	0.618	0.204	1.8862e-40	4	gne
si:ch211-288g17.31	1.17406e-44	0.451277	0.749	0.275	1.9271e-40	4	si:ch211-288g17.3
dnmt1	1.35555e-44	0.313468	0.232	0.032	2.22501e-40	4	dnmt1
snrpe	1.40902e-44	0.426223	0.435	0.105	2.31277e-40	4	snrpe
snrpd2	1.60105e-44	0.388673	0.527	0.146	2.62797e-40	4	snrpd2
cdh11	1.62377e-44	0.344397	0.96	0.884	2.66526e-40	2	cdh1
cbr1l	2.37237e-44	0.179891	0.145	0.021	3.89401e-40	3	cbr1l
irs1	2.39841e-44	0.313452	0.416	0.16	3.93675e-40	3	irs1
zgc:1951731	2.43492e-44	0.353902	0.436	0.177	3.99668e-40	3	zgc:195173
cldn11a1	3.15038e-44	0.295219	0.997	0.977	5.17104e-40	2	cldn11a
fbln52	3.44793e-44	0.725031	0.894	0.468	5.65944e-40	4	fbln5
snrpg	4.24352e-44	0.30579	0.372	0.079	6.96531e-40	4	snrpg
hoxd9a	4.88841e-44	0.128349	0.119	0.013	8.02384e-40	3	hoxd9a
rhocb	5.10894e-44	0.347842	0.359	0.12	8.38581e-40	3	rhocb
si:ch211-226m16.2	5.26075e-44	0.141309	0.148	0.022	8.63499e-40	3	si:ch211-226m16.2
rock2b.1	5.2976e-44	0.281848	0.324	0.028	8.69548e-40	5	rock2b.1
kif26aa	6.6515e-44	0.116269	0.139	0.028	1.09178e-39	0	kif26aa
wu:fj29h11	8.32813e-44	0.378652	0.355	0.122	1.36698e-39	3	wu:fj29h11
dmrt2b	9.12441e-44	0.132658	0.136	0.027	1.49768e-39	0	dmrt2b
kank21	1.10082e-43	0.271712	0.324	0.028	1.80689e-39	5	kank2
lingo2a	1.10916e-43	0.105132	0.085	0.001	1.82057e-39	5	lingo2a
gstt1a	1.13905e-43	0.178902	0.34	0.157	1.86964e-39	0	gstt1a
pa2g4a	1.53407e-43	0.407392	0.551	0.162	2.51802e-39	4	pa2g4a
lrp1aa	1.55979e-43	0.219413	0.366	0.174	2.56025e-39	0	lrp1aa
rftn2	1.77935e-43	0.240398	0.378	0.191	2.92063e-39	1	rftn2
slc11a2	2.32836e-43	0.203975	0.251	0.094	3.82176e-39	0	slc11a2
abce1	2.56736e-43	0.324754	0.367	0.079	4.21407e-39	4	abce1
wsb1	2.86264e-43	0.215647	0.388	0.19	4.69874e-39	0	wsb1
cebpb	2.95101e-43	0.737715	0.507	0.341	4.84379e-39	1	cebpb
caprin1b	2.98412e-43	0.206401	0.369	0.175	4.89813e-39	0	caprin1b
gata5	3.00752e-43	0.14848	0.24	0.087	4.93654e-39	0	gata5
pdlim2	3.00774e-43	0.220393	0.206	0.067	4.93691e-39	1	pdlim2
pdk2a	3.225e-43	0.182591	0.281	0.117	5.29352e-39	0	pdk2a
il152	3.31354e-43	0.702369	0.507	0.071	5.43884e-39	5	il15
setb	3.56949e-43	0.523629	0.792	0.325	5.85896e-39	4	setb
oaz1b	4.39423e-43	0.207325	0.969	0.897	7.21269e-39	0	oaz1b
ugt1b5	4.4869e-43	0.149927	0.178	0.033	7.3648e-39	3	ugt1b5
aebp1	4.53578e-43	0.320897	0.324	0.029	7.44503e-39	5	aebp1
eif3d	5.53252e-43	0.240708	0.709	0.47	9.08107e-39	0	eif3d
bmpr2a	5.54311e-43	0.292844	0.798	0.693	9.09847e-39	1	bmpr2a
tpd52l2b	7.59708e-43	0.313351	0.341	0.111	1.24699e-38	3	tpd52l2b
impdh1b	7.77663e-43	0.224352	0.625	0.368	1.27646e-38	0	impdh1b
cd631	8.17436e-43	0.450704	0.612	0.313	1.34174e-38	3	cd63
chaf1b	8.20628e-43	0.158935	0.135	0.011	1.34698e-38	4	chaf1b
ier2a	1.10361e-42	0.259232	0.849	0.624	1.81147e-38	0	ier2a
zbtb20	1.23998e-42	0.383639	0.548	0.274	2.0353e-38	3	zbtb20
tapbp.11	1.3154e-42	0.428873	0.445	0.174	2.1591e-38	3	tapbp.1
epha6	1.40159e-42	0.128369	0.134	0.018	2.30057e-38	3	epha6
snrpb	1.54654e-42	0.495518	0.633	0.213	2.53849e-38	4	snrpb
gins3	2.01663e-42	0.147142	0.121	0.008	3.3101e-38	4	gins3
col18a1a1	2.79111e-42	0.330212	0.362	0.077	4.58133e-38	4	col18a1a
ppp1r3cb	3.31022e-42	0.11962	0.11	0.012	5.43339e-38	3	ppp1r3cb
adamts2	3.60276e-42	0.216057	0.353	0.171	5.91357e-38	1	adamts2
nrp2a	3.8487e-42	0.267554	0.623	0.441	6.31726e-38	1	nrp2a
rps28	3.99511e-42	0.158186	1	1	6.55758e-38	0	rps28
dusp2	4.04399e-42	0.781971	0.617	0.357	6.6378e-38	3	dusp2
ppl	4.55121e-42	0.324902	0.493	0.305	7.47035e-38	1	ppl
cyp2ad2	4.58305e-42	0.105833	0.07	0.001	7.52262e-38	5	cyp2ad2
emx21	5.59555e-42	0.499646	0.797	0.529	9.18453e-38	3	emx2
plpp1a1	6.0326e-42	1.22364	0.859	0.239	9.90191e-38	5	plpp1a
xbp1	8.80911e-42	0.565732	0.65	0.383	1.44593e-37	3	xbp1
gpc1a	9.22475e-42	0.135281	0.181	0.053	1.51415e-37	1	gpc1a
sub1b1	9.43085e-42	0.36954	0.531	0.156	1.54798e-37	4	sub1b
arl6ip5b	9.9573e-42	0.237042	0.284	0.083	1.63439e-37	3	arl6ip5b
nfkb2	1.13547e-41	0.223017	0.244	0.063	1.86376e-37	3	nfkb2
tmem256	1.47255e-41	0.38309	0.357	0.126	2.41704e-37	3	tmem256
slc25a23a	1.61514e-41	0.15033	0.17	0.031	2.65109e-37	3	slc25a23a
pfdn5	1.83918e-41	0.202605	0.37	0.177	3.01883e-37	0	pfdn5
ache	2.26554e-41	0.135563	0.139	0.02	3.71865e-37	3	ache
mrpl11	2.70352e-41	0.303076	0.372	0.084	4.43756e-37	4	mrpl11
rsad2	2.73907e-41	0.511546	0.227	0.055	4.49591e-37	3	rsad2
rhov	2.9262e-41	0.12963	0.124	0.023	4.80306e-37	0	rhov
selenop1	3.78861e-41	0.296021	0.972	0.938	6.21862e-37	2	selenop
BX000534.1	3.85966e-41	0.179183	0.11	0.012	6.33525e-37	3	BX000534.1
tpm4a	4.18813e-41	0.368187	0.602	0.476	6.8744e-37	1	tpm4a
mcmbp	4.23178e-41	0.168887	0.145	0.013	6.94604e-37	4	mcmbp
socs3a1	5.06491e-41	0.576194	0.974	0.821	8.31355e-37	3	socs3a
nop10	5.08407e-41	0.426624	0.715	0.265	8.34499e-37	4	nop10
nudt1	5.8038e-41	0.338627	0.435	0.117	9.52635e-37	4	nudt1
nid1a	7.14964e-41	0.190408	0.23	0.085	1.17354e-36	1	nid1a
CABZ01005379.1	7.43424e-41	0.169482	0.227	0.034	1.22026e-36	4	CABZ01005379.1
aldh6a1	9.42351e-41	0.195245	0.405	0.201	1.54678e-36	0	aldh6a1
btg2	1.03249e-40	0.241537	0.955	0.901	1.69472e-36	0	btg2
ednrab	1.06844e-40	0.172459	0.404	0.21	1.75373e-36	0	ednrab
myl6	1.36587e-40	0.239788	0.258	0.069	2.24193e-36	3	myl6
eif2s3	1.39649e-40	0.224107	0.577	0.348	2.29221e-36	0	eif2s3
si:ch211-225h24.2	1.75592e-40	0.127085	0.188	0.059	2.88217e-36	0	si:ch211-225h24.2
pacsin2	1.90768e-40	0.191602	0.249	0.097	3.13126e-36	0	pacsin2
ca10a	1.96914e-40	0.105688	0.112	0.013	3.23214e-36	3	ca10a
zgc:162730	2.0135e-40	0.397491	0.65	0.45	3.30496e-36	0	zgc:162730
limch1b	2.20026e-40	0.173813	0.47	0.265	3.61151e-36	0	limch1b
unga	2.25469e-40	0.172209	0.126	0.01	3.70085e-36	4	unga
RPL37A1	2.45241e-40	0.179812	1	1	4.02539e-36	2	RPL37A
leo1	2.68337e-40	0.196173	0.315	0.14	4.40449e-36	0	leo1
LO017815.1	3.08069e-40	0.106343	0.097	0.009	5.05664e-36	3	LO017815.1
si:dkey-28b4.8	3.10662e-40	0.180314	0.22	0.053	5.09921e-36	3	si:dkey-28b4.8
vdac3	3.12077e-40	0.201281	0.43	0.225	5.12243e-36	0	vdac3
ak2	3.49743e-40	0.212702	0.371	0.183	5.74068e-36	0	ak2
rab11fip4b	3.86696e-40	0.236372	0.304	0.095	6.34723e-36	3	rab11fip4b
cct31	4.21509e-40	0.598868	0.879	0.482	6.91866e-36	4	cct3
mycb	4.25967e-40	0.518791	0.85	0.817	6.99182e-36	1	mycb
wu:fc75a09	6.11833e-40	0.207023	0.612	0.389	1.00426e-35	0	wu:fc75a09
myca	7.06552e-40	0.277907	0.352	0.036	1.15973e-35	5	myca
tagapa	7.48572e-40	0.171946	0.128	0.018	1.22871e-35	3	tagapa
eif3i	7.63911e-40	0.205296	0.385	0.196	1.25388e-35	0	eif3i
si:ch211-222l21.12	7.7902e-40	0.820587	0.789	0.167	1.27868e-35	5	si:ch211-222l21.1
znf609b	8.45592e-40	0.271988	0.519	0.343	1.38795e-35	1	znf609b
vegfab	9.30422e-40	0.148348	0.275	0.116	1.5272e-35	0	vegfab
trpm6	9.41775e-40	0.145095	0.174	0.051	1.54583e-35	1	trpm6
eif3m	1.01139e-39	0.250804	0.791	0.561	1.6601e-35	0	eif3m
anxa4	1.21966e-39	0.206559	0.483	0.265	2.00195e-35	0	anxa4
creb3l3l	1.23715e-39	0.264323	0.456	0.277	2.03066e-35	1	creb3l3l
rpl35a	1.4921e-39	0.137929	1	1	2.44913e-35	0	rpl35a
chad	1.60458e-39	0.118293	0.09	0.008	2.63376e-35	3	chad
si:dkey-42i9.16	1.86684e-39	0.118912	0.164	0.046	3.06423e-35	0	si:dkey-42i9.16
si:ch211-199g17.2	1.87223e-39	0.423806	0.566	0.282	3.07308e-35	3	si:ch211-199g17.2
COX5B	1.88711e-39	0.255149	0.79	0.57	3.0975e-35	0	COX5B
hmgb2a1	1.9357e-39	0.518885	0.7	0.269	3.17726e-35	4	hmgb2a
zgc:56304	2.18897e-39	0.341898	0.488	0.139	3.59297e-35	4	zgc:56304
vasna	2.24002e-39	0.158373	0.275	0.118	3.67676e-35	0	vasna
homer1b	2.54541e-39	0.121548	0.166	0.048	4.17804e-35	0	homer1b
si:dkey-188i13.10	2.69342e-39	0.439166	0.564	0.285	4.42098e-35	3	si:dkey-188i13.10
si:dkeyp-115e12.6	2.8386e-39	0.155731	0.151	0.039	4.65928e-35	0	si:dkeyp-115e12.6
mapk12a	3.2084e-39	0.146658	0.226	0.085	5.26626e-35	0	mapk12a
ecm1b1	3.63566e-39	0.269828	1	0.946	5.96757e-35	2	ecm1b
rnf144b	3.90962e-39	0.152611	0.255	0.105	6.41725e-35	0	rnf144b
cebpb1	3.97513e-39	0.658832	0.654	0.362	6.52478e-35	3	cebpb
sema6d	3.99293e-39	0.124092	0.141	0.022	6.554e-35	3	sema6d
notch3	5.63506e-39	0.211661	0.992	0.92	9.2494e-35	1	notch3
myo1d	5.87719e-39	0.165459	0.378	0.195	9.64682e-35	0	myo1d
inhbaa	6.34591e-39	0.236978	0.742	0.514	1.04162e-34	0	inhbaa
zgc:152774	6.82768e-39	0.120988	0.128	0.018	1.1207e-34	3	zgc:152774
ppa1b	9.29936e-39	0.278519	0.333	0.072	1.5264e-34	4	ppa1b
sorbs1	1.37916e-38	0.291197	0.352	0.038	2.26376e-34	5	sorbs1
calcoco2	1.68462e-38	0.17975	0.205	0.048	2.76514e-34	3	calcoco2
si:ch211-166a6.5	2.06702e-38	0.222152	0.286	0.089	3.39281e-34	3	si:ch211-166a6.5
tmem30ab	2.22406e-38	0.31301	0.377	0.145	3.65058e-34	3	tmem30ab
spon1b	2.36874e-38	0.142763	0.258	0.107	3.88805e-34	0	spon1b
igfbp5b	2.45688e-38	0.384512	0.401	0.159	4.03272e-34	3	igfbp5b
fblim1	2.95024e-38	0.229922	0.324	0.11	4.84253e-34	3	fblim1
zgc:1627301	3.48945e-38	0.582674	0.804	0.491	5.72759e-34	3	zgc:162730
hmgb3a	3.58892e-38	0.289297	0.416	0.171	5.89086e-34	3	hmgb3a
vat1	4.13869e-38	0.361847	0.34	0.178	6.79324e-34	1	vat1
cdh21	4.63738e-38	0.557099	0.634	0.125	7.61179e-34	5	cdh2
ier5l	4.8172e-38	0.143609	0.095	0.009	7.90695e-34	3	ier5l
rplp2	6.31248e-38	0.185315	0.977	0.914	1.03613e-33	0	rplp2
gstp11	6.65117e-38	0.361321	0.361	0.13	1.09172e-33	3	gstp1
rgl1	6.70876e-38	0.190588	0.387	0.208	1.10118e-33	0	rgl1
egfra	7.58721e-38	0.201717	0.451	0.26	1.24536e-33	0	egfra
tmem200b1	7.77866e-38	0.25795	0.254	0.02	1.27679e-33	5	tmem200b
zgc:194655	8.00782e-38	0.16377	0.148	0.026	1.3144e-33	3	zgc:194655
adh8b	8.45246e-38	0.213758	0.207	0.05	1.38739e-33	3	adh8b
dpysl5a	9.26335e-38	0.109709	0.157	0.044	1.52049e-33	0	dpysl5a
tfam	1.29275e-37	0.315421	0.454	0.133	2.12191e-33	4	tfam
slco2b1	1.43139e-37	0.107505	0.131	0.03	2.34948e-33	0	slco2b1
znf503	1.47584e-37	0.102534	0.11	0.014	2.42244e-33	3	znf503
atp5l	1.57552e-37	0.252857	0.754	0.541	2.58605e-33	0	atp5l
tgm1l1	1.59906e-37	0.147644	0.176	0.036	2.62469e-33	3	tgm1l1
ifi45	1.63681e-37	0.613633	0.518	0.258	2.68666e-33	3	ifi45
si:dkey-16l2.16	2.10418e-37	0.185615	0.161	0.031	3.4538e-33	3	si:dkey-16l2.16
gapdhs	2.35662e-37	0.231621	0.853	0.826	3.86815e-33	1	gapdhs
gsto2	2.94022e-37	0.15558	0.156	0.029	4.82608e-33	3	gsto2
cx34.51	3.34023e-37	0.561898	0.773	0.338	5.48266e-33	4	cx34.5
fkbp1aa	3.42371e-37	0.481782	0.74	0.482	5.61967e-33	3	fkbp1aa
rbpms2b	3.56489e-37	0.199458	0.128	0.019	5.8514e-33	3	rbpms2b
s100v2	3.73734e-37	0.337427	0.504	0.329	6.13447e-33	1	s100v2
dap1b	4.20832e-37	0.212865	0.994	0.951	6.90754e-33	1	dap1b
rnf128a	4.46898e-37	0.167176	0.2	0.07	7.33538e-33	0	rnf128a
syne2b	4.79131e-37	0.144959	0.216	0.082	7.86446e-33	0	syne2b
chrna1	4.85279e-37	0.143526	0.327	0.157	7.96538e-33	0	chrna1
si:dkey-112a7.4	4.9298e-37	0.26937	0.244	0.068	8.09178e-33	3	si:dkey-112a7.4
skap2	4.96186e-37	0.107411	0.126	0.018	8.14439e-33	3	skap2
srsf10b	5.48337e-37	0.234535	0.266	0.05	9.00041e-33	4	srsf10b
zgc:92140	5.63608e-37	0.241511	0.267	0.082	9.25107e-33	3	zgc:92140
mdh2	7.04478e-37	0.23831	0.743	0.522	1.15633e-32	0	mdh2
si:ch211-214j24.10	7.15884e-37	0.19109	0.377	0.192	1.17505e-32	0	si:ch211-214j24.10
ccdc50	7.31911e-37	0.165161	0.295	0.138	1.20136e-32	0	ccdc50
cemip	8.59706e-37	0.141405	0.165	0.05	1.41112e-32	1	cemip
fosab1	9.63716e-37	0.462678	0.991	0.95	1.58184e-32	3	fosab
rapgef2	1.15063e-36	0.232704	0.375	0.205	1.88865e-32	1	rapgef2
aaas	1.29567e-36	0.150295	0.116	0.009	2.12671e-32	4	aaas
ptmaa	1.31181e-36	0.338033	0.717	0.609	2.15321e-32	1	ptmaa
rpl281	1.49187e-36	0.145636	1	1	2.44876e-32	2	rpl28
zfp36l1b1	1.61215e-36	0.501979	0.599	0.339	2.64619e-32	3	zfp36l1b
tnfsf121	2.14132e-36	0.481467	0.507	0.082	3.51477e-32	5	tnfsf12
chka	2.22359e-36	0.301892	0.722	0.683	3.64979e-32	1	chka
rpl211	2.43239e-36	0.152978	1	1	3.99252e-32	2	rpl21
cd74b1	2.45429e-36	0.449508	0.896	0.567	4.02847e-32	3	cd74b
cox6b1	2.99153e-36	0.277752	0.372	0.092	4.9103e-32	4	cox6b1
hmgb3b	3.13076e-36	0.368956	0.614	0.211	5.13882e-32	4	hmgb3b
rpl38	3.28778e-36	0.152018	1	0.997	5.39657e-32	0	rpl38
tsr2	4.30784e-36	0.17396	0.28	0.123	7.07088e-32	0	tsr2
zgc:153738	4.56841e-36	0.137862	0.186	0.064	7.49859e-32	0	zgc:153738
add3b1	4.71816e-36	0.19451	0.239	0.018	7.74439e-32	5	add3b
ugt5g1	4.91958e-36	0.117118	0.106	0.013	8.07499e-32	3	ugt5g1
fscn1a	5.45138e-36	0.177321	0.579	0.334	8.9479e-32	0	fscn1a
tpt1	5.77135e-36	0.165776	0.988	0.951	9.47309e-32	0	tpt1
romo1	5.82166e-36	0.229652	0.79	0.584	9.55567e-32	0	romo1
slc9a7	7.39115e-36	0.104155	0.138	0.036	1.21318e-31	0	slc9a7
smad2	8.3383e-36	0.182339	0.602	0.359	1.36865e-31	0	smad2
coro2a	1.03547e-35	0.103848	0.119	0.017	1.69962e-31	3	coro2a
lxn	1.17558e-35	0.748283	0.803	0.211	1.9296e-31	5	lxn
vldlr	1.27465e-35	0.23995	0.246	0.045	2.0922e-31	4	vldlr
fstl1b1	1.36093e-35	0.471404	0.521	0.088	2.23383e-31	5	fstl1b
si:ch211-132g1.3	1.38427e-35	0.134669	0.215	0.083	2.27214e-31	0	si:ch211-132g1.3
rpl35	1.40345e-35	0.126295	0.999	0.998	2.30362e-31	0	rpl35
col16a1	1.5927e-35	0.17263	0.287	0.132	2.61425e-31	1	col16a1
txnrd3	1.6e-35	0.236241	0.266	0.051	2.62625e-31	4	txnrd3
mrpl20	1.70791e-35	0.247471	0.295	0.061	2.80336e-31	4	mrpl20
s100a10b	1.79029e-35	0.108539	0.522	0.303	2.93858e-31	1	s100a10b
krt18b1	1.79446e-35	0.667173	0.507	0.077	2.94542e-31	5	krt18b
supt16h	2.02005e-35	0.309087	0.391	0.104	3.3157e-31	4	supt16h
cgnl1	2.07155e-35	0.233281	0.291	0.098	3.40024e-31	3	cgnl1
wls1	2.21376e-35	0.502619	0.549	0.093	3.63367e-31	5	wls
krt91	2.25333e-35	0.981393	0.169	0.009	3.69862e-31	5	krt91
mylk4b	2.49326e-35	0.100834	0.113	0.023	4.09243e-31	0	mylk4b
hnrnpabb	2.56524e-35	0.52503	0.725	0.287	4.21058e-31	4	hnrnpabb
spred2b	2.69389e-35	0.149278	0.17	0.036	4.42175e-31	3	spred2b
prdx6	2.86988e-35	0.193909	0.472	0.267	4.71063e-31	0	prdx6
eif4a1a	3.03822e-35	0.421838	0.58	0.198	4.98693e-31	4	eif4a1a
swap70b	4.32315e-35	0.173406	0.415	0.22	7.09602e-31	0	swap70b
irf1b1	4.35684e-35	0.45965	0.328	0.118	7.15133e-31	3	irf1b
mgst3a	4.3937e-35	0.289589	0.278	0.09	7.21182e-31	3	mgst3a
mpped2a	4.50265e-35	0.205735	0.262	0.082	7.39065e-31	3	mpped2a
calm1b	4.52562e-35	0.181577	0.22	0.059	7.42835e-31	3	calm1b
frmd61	5.56647e-35	0.395947	0.768	0.347	9.1368e-31	4	frmd6
hnrnpa1b	5.7416e-35	0.504676	0.754	0.331	9.42426e-31	4	hnrnpa1b
nrxn2b	5.92838e-35	0.163567	0.368	0.194	9.73084e-31	0	nrxn2b
mt-atp62	7.66484e-35	0.379533	1	0.995	1.25811e-30	4	mt-atp6
eif4h	8.09821e-35	0.30348	0.401	0.108	1.32924e-30	4	eif4h
slc12a8	9.92635e-35	0.101933	0.144	0.04	1.62931e-30	0	slc12a8
entpd11	9.96312e-35	0.493407	0.479	0.076	1.63535e-30	5	entpd1
hsp90aa1.21	1.0283e-34	0.725713	0.797	0.562	1.68785e-30	3	hsp90aa1.2
gfpt1	1.54044e-34	0.104612	0.149	0.043	2.52848e-30	0	gfpt1
marcksa	1.59012e-34	0.103596	0.117	0.017	2.61003e-30	3	marcksa
igf1rb	1.6958e-34	0.131342	0.219	0.087	2.78349e-30	0	igf1rb
rps15a1	1.9906e-34	0.153552	1	1	3.26736e-30	2	rps15a
rpl22	2.58553e-34	0.139878	0.996	0.979	4.24389e-30	0	rpl22
ddx39ab	2.97826e-34	0.367281	0.401	0.107	4.88851e-30	4	ddx39ab
bhmt	3.10711e-34	0.217442	0.211	0.015	5.1e-30	5	bhmt
plekho1b	3.44715e-34	0.154309	0.282	0.13	5.65815e-30	1	plekho1b
bxdc2	3.95772e-34	0.266902	0.304	0.067	6.49619e-30	4	bxdc2
cirbpa1	4.53819e-34	0.527018	0.899	0.525	7.44899e-30	4	cirbpa
rps21	4.54067e-34	0.136479	1	1	7.45306e-30	0	rps21
ier51	5.15126e-34	0.501305	0.795	0.545	8.45528e-30	3	ier5
arhgef1b	5.29207e-34	0.396686	0.443	0.215	8.6864e-30	3	arhgef1b
mhc1zba1	5.49086e-34	0.37152	0.91	0.739	9.01269e-30	3	mhc1zba
nap1l1	5.52481e-34	0.365908	0.367	0.096	9.06842e-30	4	nap1l1
cox5ab	6.03821e-34	0.366014	0.575	0.201	9.91112e-30	4	cox5ab
naa10	6.06103e-34	0.17808	0.303	0.146	9.94858e-30	0	naa10
atp5f1e	6.32042e-34	0.220721	0.715	0.506	1.03743e-29	0	atp5f1e
bysl	7.47584e-34	0.309251	0.43	0.123	1.22708e-29	4	bysl
rpl36a1	7.94364e-34	0.162564	1	0.999	1.30387e-29	2	rpl36a
smarcad1a	8.74949e-34	0.127067	0.101	0.007	1.43614e-29	4	smarcad1a
cmasa1	9.96102e-34	0.477152	0.831	0.4	1.635e-29	4	cmasa
atp2b1a	1.06302e-33	0.169	0.312	0.149	1.74484e-29	0	atp2b1a
tnfsf12	1.07033e-33	0.200332	0.242	0.071	1.75685e-29	3	tnfsf12
ppiab	1.20363e-33	0.396203	0.99	0.862	1.97565e-29	4	ppiab
RASSF5	1.31811e-33	0.165894	0.425	0.245	2.16354e-29	0	RASSF5
col18a1a	1.37918e-33	0.14986	0.16	0.051	2.26378e-29	0	col18a1a
hsd3b71	1.40692e-33	0.259984	0.207	0.054	2.30932e-29	3	hsd3b7
dscc1	1.47569e-33	0.122781	0.145	0.017	2.4222e-29	4	dscc1
myl9b1	1.67698e-33	0.334968	0.507	0.238	2.75259e-29	3	myl9b
pros1	2.05937e-33	0.269241	0.167	0.058	3.38025e-29	1	pros1
odc1	2.21073e-33	0.463598	0.749	0.322	3.6287e-29	4	odc1
rps27.21	3.19879e-33	0.244381	1	0.986	5.25049e-29	3	rps27.2
eif3f	3.49572e-33	0.207411	0.888	0.723	5.73788e-29	0	eif3f
cavin2a	3.54393e-33	0.220888	0.306	0.109	5.817e-29	3	cavin2a
atad5a	3.76371e-33	0.239263	0.271	0.056	6.17776e-29	4	atad5a
rgcc	3.86806e-33	0.271404	0.469	0.275	6.34903e-29	0	rgcc
tsc22d3	4.37579e-33	0.221822	0.32	0.161	7.18242e-29	0	tsc22d3
snrpf1	4.39278e-33	0.372364	0.686	0.268	7.2103e-29	4	snrpf
n4bp1	4.45516e-33	0.206707	0.242	0.074	7.3127e-29	3	n4bp1
cog6	4.64367e-33	0.12585	0.193	0.072	7.62213e-29	0	cog6
epha4a1	4.68738e-33	0.206269	0.225	0.018	7.69387e-29	5	epha4a
prdx3	6.18778e-33	0.308829	0.478	0.149	1.01566e-28	4	prdx3
sos1	6.27639e-33	0.157059	0.498	0.305	1.03021e-28	0	sos1
ahcy1	6.48754e-33	0.313175	0.44	0.13	1.06486e-28	4	ahcy
nrg2a	7.27003e-33	0.148852	0.238	0.102	1.1933e-28	1	nrg2a
CR762483.1	7.36134e-33	0.194434	0.081	0.008	1.20829e-28	3	CR762483.1
phc2a1	7.69435e-33	0.635906	0.394	0.056	1.26295e-28	5	phc2a
ccdc88c	7.98298e-33	0.108844	0.126	0.021	1.31033e-28	3	ccdc88c
mrpl12	8.38105e-33	0.304151	0.464	0.141	1.37567e-28	4	mrpl12
tmsb4x1	8.53977e-33	0.260091	1	0.998	1.40172e-28	3	tmsb4x
ndufa4l	8.71625e-33	0.180677	0.952	0.877	1.43069e-28	0	ndufa4l
ube2nb	8.71975e-33	0.156616	0.33	0.162	1.43126e-28	0	ube2nb
rbp5	9.10213e-33	0.178762	0.598	0.372	1.49402e-28	0	rbp5
nedd8	9.95474e-33	0.233766	0.329	0.078	1.63397e-28	4	nedd8
DTX4	1.08274e-32	0.130616	0.245	0.108	1.77721e-28	0	DTX4
anxa11a	1.12711e-32	0.205695	0.225	0.063	1.85003e-28	3	anxa11a
ankrd22	1.29361e-32	0.103159	0.09	0.01	2.12333e-28	3	ankrd22
slc29a1a1	1.33571e-32	0.658598	0.662	0.15	2.19244e-28	5	slc29a1a
eif4e1c	1.35999e-32	0.235349	0.28	0.06	2.23229e-28	4	eif4e1c
her4.1	1.3603e-32	0.213791	0.352	0.188	2.2328e-28	0	her4.1
meis1a	1.46389e-32	0.146153	0.169	0.01	2.40283e-28	5	meis1a
sash1a	1.79306e-32	0.15641	0.421	0.225	2.94312e-28	0	sash1a
skia	2.02557e-32	0.147908	0.384	0.213	3.32476e-28	0	skia
sp100.1	2.06152e-32	0.134471	0.159	0.021	3.38378e-28	4	sp100.1
pdgfrb	2.19135e-32	0.377734	0.493	0.085	3.59689e-28	5	pdgfrb
tma7	2.36025e-32	0.425361	0.729	0.309	3.87411e-28	4	tma7
mdh1aa	2.70268e-32	0.181335	0.462	0.264	4.43618e-28	0	mdh1aa
si:dkey-194e6.1	3.08857e-32	0.164661	0.375	0.205	5.06958e-28	0	si:dkey-194e6.1
CU984600.2	3.17861e-32	0.220512	0.222	0.064	5.21737e-28	3	CU984600.2
erf	3.19922e-32	0.143426	0.29	0.142	5.25121e-28	0	erf
itm2bb1	3.6652e-32	0.206195	1	0.981	6.01605e-28	2	itm2bb
dkk3b1	3.75067e-32	0.429515	0.366	0.047	6.15634e-28	5	dkk3b
si:ch73-281n10.2	3.81267e-32	0.462324	0.85	0.444	6.25811e-28	4	si:ch73-281n10.2
tgif1	4.09176e-32	0.351207	0.432	0.195	6.71621e-28	3	tgif1
actb11	4.52782e-32	0.450158	0.938	0.735	7.43197e-28	3	actb1
hspb11	4.91535e-32	0.228583	0.166	0.055	8.06806e-28	0	hspb11
slc25a3b	5.30819e-32	0.206644	0.884	0.738	8.71287e-28	0	slc25a3b
bmp4	5.34646e-32	0.175983	0.281	0.136	8.77567e-28	1	bmp4
lsm12b	5.36975e-32	0.1762	0.445	0.253	8.81391e-28	0	lsm12b
serinc2	5.5283e-32	0.342394	0.445	0.205	9.07415e-28	3	serinc2
ets2	5.97286e-32	0.147588	0.153	0.049	9.80386e-28	0	ets2
bckdhb1	6.21524e-32	0.301636	0.464	0.145	1.02017e-27	4	bckdhb
nsmce4a	6.63828e-32	0.110809	0.111	0.01	1.08961e-27	4	nsmce4a
zgc:1748631	7.66082e-32	0.267861	0.917	0.873	1.25745e-27	2	zgc:174863
itm2ba	7.96414e-32	0.250044	0.778	0.777	1.30723e-27	1	itm2ba
cbx1a	8.22655e-32	0.381662	0.638	0.246	1.35031e-27	4	cbx1a
ccnd2a	8.2674e-32	0.429208	0.7	0.315	1.35701e-27	4	ccnd2a
capn2a	8.70094e-32	0.195917	0.358	0.197	1.42817e-27	1	capn2a
efna1a	8.91986e-32	0.118132	0.184	0.068	1.46411e-27	0	efna1a
aoc2	9.02268e-32	0.180965	0.085	0.002	1.48098e-27	5	aoc2
ecrg4a	9.28255e-32	0.263959	0.257	0.118	1.52364e-27	1	ecrg4a
cntfr	9.35223e-32	0.200778	0.231	0.069	1.53508e-27	3	cntfr
bnc21	9.81079e-32	0.309924	0.465	0.073	1.61034e-27	5	bnc2
tead1b	1.01568e-31	0.224388	0.404	0.24	1.66713e-27	1	tead1b
tgm1l11	1.12819e-31	0.350578	0.352	0.046	1.85181e-27	5	tgm1l1
smox	1.19689e-31	0.148658	0.192	0.05	1.96458e-27	3	smox
c7a	1.22481e-31	0.115629	0.118	0.03	2.0104e-27	1	c7a
rpl81	1.24207e-31	0.149546	1	1	2.03874e-27	2	rpl8
phkg1a	1.32905e-31	0.115722	0.166	0.058	2.1815e-27	0	phkg1a
cd164	1.39048e-31	0.310073	0.405	0.26	2.28233e-27	1	cd164
gmps1	1.47393e-31	0.29541	0.9	0.836	2.4193e-27	2	gmps
ssb	1.55797e-31	0.277078	0.372	0.101	2.55724e-27	4	ssb
svild	1.68539e-31	0.177243	0.585	0.359	2.7664e-27	0	svild
cdk2	1.77177e-31	0.128876	0.111	0.01	2.90818e-27	4	cdk2
tjp2b	1.8354e-31	0.294261	0.341	0.132	3.01262e-27	3	tjp2b
pola2	1.88494e-31	0.134349	0.164	0.023	3.09394e-27	4	pola2
CABZ01044746.1	2.0752e-31	0.171474	0.139	0.027	3.40624e-27	3	CABZ01044746.1
si:dkeyp-55f12.3	2.18601e-31	0.2056	0.179	0.027	3.58812e-27	4	si:dkeyp-55f12.3
smad5	2.19746e-31	0.179506	0.161	0.036	3.60691e-27	3	smad5
vat11	3.04905e-31	0.38625	0.447	0.203	5.0047e-27	3	vat1
her4.2.1	3.09485e-31	0.240083	0.306	0.157	5.07989e-27	0	her4.2.1
si:dkey-222f8.3	3.1661e-31	0.251818	0.306	0.111	5.19684e-27	3	si:dkey-222f8.3
cpn1.1	3.48226e-31	0.161837	0.211	0.086	5.71578e-27	0	cpn1.1
arl8ba	3.86306e-31	0.18096	0.304	0.155	6.34082e-27	1	arl8ba
ldhba	3.88631e-31	0.201037	0.616	0.395	6.37899e-27	0	ldhba
ampd2b	4.76491e-31	0.205896	0.478	0.308	7.82112e-27	1	ampd2b
itga1	5.2103e-31	0.107934	0.144	0.044	8.55219e-27	1	itga1
raph1b	5.58398e-31	0.134224	0.258	0.122	9.16555e-27	0	raph1b
si:busm1-57f23.1	5.96935e-31	0.420207	0.322	0.175	9.79809e-27	1	si:busm1-57f23.1
ripply1	6.52735e-31	0.206967	0.141	0.007	1.0714e-26	5	ripply1
itgav	6.93543e-31	0.171606	0.214	0.062	1.13838e-26	3	itgav
hsd17b11	8.2777e-31	0.258489	0.958	0.882	1.3587e-26	2	hsd17b1
psma1	8.4261e-31	0.178103	0.578	0.367	1.38306e-26	0	psma1
zgc:153372	8.99013e-31	0.195317	0.247	0.08	1.47564e-26	3	zgc:153372
arpc1b	9.15421e-31	0.148767	0.141	0.029	1.50257e-26	3	arpc1b
celf2	9.26743e-31	0.16456	0.209	0.06	1.52116e-26	3	celf2
si:ch211-212k18.7	9.85991e-31	0.377215	0.456	0.218	1.61841e-26	3	si:ch211-212k18.7
junbb	1.06295e-30	0.175802	0.575	0.36	1.74473e-26	0	junbb
ccdc85al	1.34014e-30	0.126458	0.261	0.122	2.19971e-26	0	ccdc85al
parp1	1.37714e-30	0.294504	0.517	0.19	2.26044e-26	4	parp1
rnf213a	1.4112e-30	0.415926	0.617	0.362	2.31634e-26	3	rnf213a
eif61	1.45022e-30	0.291315	0.522	0.178	2.38039e-26	4	eif6
tpi1b	1.48884e-30	0.308366	0.488	0.16	2.44378e-26	4	tpi1b
ptn	1.71607e-30	0.145786	0.171	0.061	2.81676e-26	1	ptn
mcl1a	1.75233e-30	0.475131	0.757	0.7	2.87627e-26	1	mcl1a
antxr1c	1.76252e-30	0.184415	0.721	0.509	2.89299e-26	0	antxr1c
mxi1	1.77592e-30	0.164428	0.203	0.057	2.915e-26	3	mxi1
rpl7a1	1.80434e-30	0.13896	1	0.999	2.96164e-26	2	rpl7a
pnp4a	1.85924e-30	0.201771	0.927	0.824	3.05176e-26	0	pnp4a
junba	2.04707e-30	0.347422	0.88	0.808	3.36007e-26	1	junba
rgs7bpb	2.10828e-30	0.208537	0.268	0.028	3.46053e-26	5	rgs7bpb
ranbp1	2.12922e-30	0.411399	0.831	0.417	3.4949e-26	4	ranbp1
adarb1a	2.13533e-30	0.119513	0.268	0.127	3.50494e-26	0	adarb1a
kpnb3	2.32841e-30	0.257325	0.348	0.091	3.82186e-26	4	kpnb3
phlda2	2.41236e-30	0.194478	0.855	0.762	3.95966e-26	0	phlda2
fam207a	2.50687e-30	0.153413	0.245	0.108	4.11477e-26	0	fam207a
si:dkey-56m19.52	2.62714e-30	0.559402	0.507	0.096	4.31218e-26	5	si:dkey-56m19.5
ipo71	2.90057e-30	0.339922	0.556	0.202	4.761e-26	4	ipo7
usp5	2.91077e-30	0.147216	0.227	0.098	4.77773e-26	0	usp5
nop58	2.98692e-30	0.361207	0.696	0.288	4.90272e-26	4	nop58
f101	3.00367e-30	0.411723	0.498	0.273	4.93022e-26	3	f10
rpl321	3.04846e-30	0.143782	1	1	5.00373e-26	2	rpl32
tspan15	3.14707e-30	0.102084	0.115	0.019	5.1656e-26	3	tspan15
taf15	3.24925e-30	0.347985	0.362	0.101	5.33332e-26	4	taf15
si:ch1073-291c23.2	3.41838e-30	0.153408	0.132	0.026	5.61094e-26	3	si:ch1073-291c23.2
plecb	3.50456e-30	0.199193	0.271	0.095	5.75239e-26	3	plecb
mfge8b	3.6402e-30	0.169576	0.656	0.428	5.97502e-26	0	mfge8b
adamtsl5	3.66384e-30	0.120233	0.13	0.025	6.01382e-26	3	adamtsl5
tsta3	4.1997e-30	0.102893	0.183	0.069	6.89339e-26	0	tsta3
mao1	4.64358e-30	0.264249	0.296	0.034	7.62196e-26	5	mao
rps121	4.76958e-30	0.147023	1	1	7.82878e-26	2	rps12
stox2a	5.23985e-30	0.141581	0.467	0.286	8.60069e-26	0	stox2a
tubb4b1	5.61302e-30	0.422406	0.844	0.559	9.21321e-26	3	tubb4b
si:busm1-266f07.21	7.01492e-30	0.609045	0.449	0.214	1.15143e-25	3	si:busm1-266f07.2
nccrp1	7.64722e-30	0.432186	0.321	0.197	1.25521e-25	1	nccrp1
rpl391	7.73257e-30	0.165051	1	1	1.26922e-25	2	rpl39
f3b	7.9768e-30	0.56765	0.577	0.464	1.30931e-25	1	f3b
rnd3b	8.13877e-30	0.134167	0.172	0.042	1.3359e-25	3	rnd3b
hspd1	8.31168e-30	0.386304	0.652	0.267	1.36428e-25	4	hspd1
dusp51	8.57197e-30	0.392447	0.58	0.221	1.407e-25	4	dusp5
btg1	9.25529e-30	0.206067	0.865	0.728	1.51916e-25	0	btg1
timm8b	1.02848e-29	0.262186	0.377	0.107	1.68815e-25	4	timm8b
h2afvb	1.06401e-29	0.475895	0.427	0.198	1.74647e-25	3	h2afvb
plxdc2	1.09934e-29	0.110662	0.166	0.06	1.80445e-25	0	plxdc2
rbx1	1.1878e-29	0.313566	0.705	0.284	1.94965e-25	4	rbx1
hs3st3b1b	1.27507e-29	0.331875	0.388	0.254	2.09289e-25	1	hs3st3b1b
si:ch211-137i24.10	1.29889e-29	0.264297	0.289	0.143	2.132e-25	1	si:ch211-137i24.10
cirbpa	1.39891e-29	0.239973	0.679	0.465	2.29617e-25	0	cirbpa
si:dkey-195m11.81	1.40063e-29	0.19451	0.211	0.018	2.299e-25	5	si:dkey-195m11.8
uck2b	1.52109e-29	0.181383	0.169	0.026	2.49671e-25	4	uck2b
abcf1	1.59263e-29	0.290779	0.406	0.12	2.61414e-25	4	abcf1
pbxip1b	1.60132e-29	0.227302	0.249	0.083	2.62841e-25	3	pbxip1b
vdac1	1.7494e-29	0.159392	0.495	0.297	2.87146e-25	0	vdac1
rps131	2.1156e-29	0.134839	1	1	3.47255e-25	2	rps13
chchd10	2.3501e-29	0.230799	0.3	0.072	3.85746e-25	4	chchd10
rad51	2.55134e-29	0.120061	0.092	0.007	4.18777e-25	4	rad51
sulf2b1	2.65678e-29	0.51758	0.87	0.521	4.36083e-25	4	sulf2b
slc11a21	3.21823e-29	0.303763	0.435	0.137	5.28241e-25	4	slc11a2
tiparp	3.22489e-29	0.146269	0.358	0.199	5.29334e-25	0	tiparp
rpl22l11	3.84665e-29	0.45278	0.966	0.67	6.31389e-25	4	rpl22l1
fgd5a	4.03788e-29	0.150424	0.167	0.042	6.62778e-25	3	fgd5a
si:ch211-163l21.7	4.22726e-29	0.109839	0.122	0.034	6.93863e-25	1	si:ch211-163l21.7
mblac1	4.24752e-29	0.159946	0.198	0.036	6.97187e-25	4	mblac1
ftr821	4.47507e-29	0.33389	0.408	0.064	7.34538e-25	5	ftr82
setbp1	5.06208e-29	0.139026	0.187	0.051	8.3089e-25	3	setbp1
tfe3a	5.07756e-29	0.199044	0.308	0.119	8.33431e-25	3	tfe3a
tuba1c	5.12064e-29	0.144411	0.188	0.032	8.40501e-25	4	tuba1c
tomm20a	5.87383e-29	0.358805	0.425	0.134	9.64131e-25	4	tomm20a
st13	6.27159e-29	0.146979	0.255	0.118	1.02942e-24	0	st13
si:ch211-136a13.1	7.11887e-29	0.133559	0.381	0.218	1.16849e-24	0	si:ch211-136a13.1
rps26l1	7.76394e-29	0.163312	1	0.999	1.27437e-24	2	rps26l
pde4ba	8.31766e-29	0.446415	0.817	0.64	1.36526e-24	3	pde4ba
nifk	8.71125e-29	0.256707	0.362	0.102	1.42987e-24	4	nifk
ubb1	8.76401e-29	0.48891	0.793	0.54	1.43853e-24	3	ubb
id3	8.98972e-29	0.448171	0.571	0.461	1.47557e-24	1	id3
tsc22d1	9.19652e-29	0.165604	0.393	0.218	1.50952e-24	0	tsc22d1
rbb4l	9.62654e-29	0.205012	0.251	0.054	1.5801e-24	4	rbb4l
pdcd4a	1.04254e-28	0.15332	0.285	0.14	1.71122e-24	0	pdcd4a
CU638714.1	1.08001e-28	0.130438	0.134	0.028	1.77273e-24	3	CU638714.1
zfhx4	1.08505e-28	0.156314	0.172	0.044	1.78099e-24	3	zfhx4
h2afx	1.18423e-28	0.243369	0.237	0.049	1.94379e-24	4	h2afx
tagln2	1.35107e-28	0.367289	0.394	0.267	2.21764e-24	1	tagln2
cpxm1a	1.35259e-28	0.135422	0.141	0.008	2.22014e-24	5	cpxm1a
fat1a	1.40976e-28	0.253902	0.405	0.194	2.31399e-24	3	fat1a
kcng4a	1.43549e-28	0.127207	0.143	0.032	2.35621e-24	3	kcng4a
mt-nd41	1.43893e-28	0.195655	0.985	0.965	2.36186e-24	2	mt-nd4
tp53	1.49474e-28	0.220745	0.286	0.105	2.45347e-24	3	tp53
asf1ba	1.55536e-28	0.124767	0.082	0.006	2.55297e-24	4	asf1ba
gpc4	1.5617e-28	0.319152	0.515	0.286	2.56338e-24	3	gpc4
si:dkey-74k8.3	1.76889e-28	0.187145	0.328	0.182	2.90345e-24	1	si:dkey-74k8.3
atp5mc3b1	1.93481e-28	0.193999	0.999	0.978	3.1758e-24	2	atp5mc3b
nedd9	2.28614e-28	0.105051	0.184	0.073	3.75248e-24	0	nedd9
si:ch211-281l24.3	2.36896e-28	0.28844	0.427	0.199	3.88842e-24	3	si:ch211-281l24.3
cdkn1cb	2.51584e-28	0.11176	0.126	0.015	4.12951e-24	4	cdkn1cb
tktb1	2.68788e-28	0.268572	0.551	0.195	4.41188e-24	4	tktb
bcat2	2.68829e-28	0.129759	0.212	0.089	4.41256e-24	0	bcat2
polr2d	3.47332e-28	0.286681	0.473	0.162	5.7011e-24	4	polr2d
rpl13a1	3.61294e-28	0.121833	1	1	5.93029e-24	2	rpl13a
pnp4a1	3.74706e-28	0.328194	0.949	0.846	6.15042e-24	2	pnp4a
cdkn2aipnl	3.75326e-28	0.267888	0.348	0.099	6.16061e-24	4	cdkn2aipnl
btg3	4.18568e-28	0.240439	0.324	0.086	6.87038e-24	4	btg3
txnipa1	4.48612e-28	0.410682	0.531	0.293	7.36351e-24	3	txnipa
gmps	4.78571e-28	0.191105	0.888	0.827	7.85527e-24	1	gmps
acat1	5.00709e-28	0.14299	0.22	0.097	8.21863e-24	0	acat1
si:ch211-51e12.7	5.11889e-28	0.278328	0.401	0.123	8.40215e-24	4	si:ch211-51e12.7
mef2aa	5.67564e-28	0.126008	0.61	0.406	9.31599e-24	0	mef2aa
fzd7a	5.68531e-28	0.120083	0.126	0.025	9.33187e-24	3	fzd7a
rgs12b	6.0197e-28	0.163716	0.229	0.074	9.88073e-24	3	rgs12b
si:ch211-246m6.5	6.28799e-28	0.121532	0.277	0.139	1.03211e-23	0	si:ch211-246m6.5
hspe1	6.3769e-28	0.270796	0.782	0.747	1.04671e-23	1	hspe1
got2b1	6.43781e-28	0.291549	0.522	0.185	1.0567e-23	4	got2b
jcada	6.53871e-28	0.190485	0.394	0.241	1.07326e-23	1	jcada
schip1	6.65704e-28	0.228006	0.511	0.367	1.09269e-23	1	schip1
mt-nd11	7.17291e-28	0.370208	1	0.908	1.17736e-23	4	mt-nd1
kidins220a	7.63087e-28	0.160279	0.646	0.451	1.25253e-23	0	kidins220a
c1qbp	7.64077e-28	0.338163	0.671	0.283	1.25416e-23	4	c1qbp
thy1	9.12984e-28	0.211837	0.11	0.019	1.49857e-23	3	thy1
eif4ebp3l	1.03983e-27	0.333777	0.46	0.343	1.70678e-23	1	eif4ebp3l
faua1	1.04036e-27	0.138656	1	0.999	1.70764e-23	2	faua
arpp19b	1.22614e-27	0.248647	0.3	0.077	2.01259e-23	4	arpp19b
gstm.1	1.27978e-27	0.337686	0.612	0.571	2.10063e-23	1	gstm.1
si:busm1-194e12.111	1.3067e-27	0.351563	0.396	0.19	2.14482e-23	3	si:busm1-194e12.11
npm3	1.42264e-27	0.28744	0.444	0.148	2.33513e-23	4	npm3
RPL37A	1.44119e-27	0.104535	1	1	2.36557e-23	0	RPL37A
pdlim1	1.64744e-27	0.255008	0.282	0.106	2.70411e-23	3	pdlim1
pmp22a1	1.69612e-27	0.779347	0.761	0.235	2.78402e-23	5	pmp22a
serp1	1.87225e-27	0.184849	0.196	0.082	3.07312e-23	0	serp1
pcolce2b	1.92636e-27	0.12904	0.264	0.133	3.16193e-23	0	pcolce2b
rpz3	2.00145e-27	0.148873	0.283	0.146	3.28519e-23	1	rpz3
polr2h	2.20439e-27	0.151978	0.155	0.023	3.61828e-23	4	polr2h
dnmbp	2.56375e-27	0.12372	0.27	0.136	4.20814e-23	0	dnmbp
wu:fb59d01	2.6435e-27	0.131085	0.286	0.147	4.33904e-23	0	wu:fb59d01
sertad4	3.1257e-27	0.144533	0.155	0.01	5.13053e-23	5	sertad4
dcps	3.31275e-27	0.158549	0.193	0.036	5.43754e-23	4	dcps
mgst3b	3.56715e-27	0.347343	0.718	0.482	5.85511e-23	3	mgst3b
prkd2	3.61656e-27	0.196679	0.278	0.106	5.93623e-23	3	prkd2
prdx4	3.63661e-27	0.290125	0.522	0.189	5.96913e-23	4	prdx4
plekhg4	3.70805e-27	0.296817	0.566	0.462	6.0864e-23	1	plekhg4
entpd1	3.82469e-27	0.145722	0.15	0.053	6.27785e-23	1	entpd1
rps71	3.96395e-27	0.134775	1	1	6.50643e-23	2	rps7
foxo4	4.4127e-27	0.147281	0.447	0.283	7.243e-23	0	foxo4
si:dkey-73n10.1	4.4472e-27	0.379667	0.468	0.363	7.29964e-23	1	si:dkey-73n10.1
bccip	5.19627e-27	0.141589	0.485	0.29	8.52916e-23	0	bccip
gfra31	5.21759e-27	0.295083	0.386	0.127	8.56415e-23	4	gfra3
gabarapb	7.07849e-27	0.190119	0.844	0.85	1.16186e-22	1	gabarapb
srsf1a	7.10616e-27	0.285286	0.411	0.131	1.16641e-22	4	srsf1a
slc25a15a	7.84774e-27	0.143171	0.174	0.03	1.28813e-22	4	slc25a15a
abl2	8.23997e-27	0.248384	0.31	0.042	1.35251e-22	5	abl2
srpra	8.45057e-27	0.211759	0.827	0.798	1.38708e-22	1	srpra
dek	8.80967e-27	0.241992	0.444	0.156	1.44602e-22	4	dek
CABZ01084501.3	9.12041e-27	0.141601	0.063	0.008	1.49702e-22	0	CABZ01084501.3
TXN	9.17106e-27	0.365521	0.986	0.794	1.50534e-22	4	TXN
rpl131	9.2619e-27	0.122752	1	1	1.52025e-22	2	rpl13
rpl29	9.30038e-27	0.162077	0.972	0.898	1.52656e-22	0	rpl29
kirrel1a	1.02529e-26	0.114318	0.161	0.041	1.68291e-22	3	kirrel1a
tomm22	1.10994e-26	0.24851	0.338	0.096	1.82186e-22	4	tomm22
prpf19	1.13589e-26	0.232729	0.295	0.076	1.86445e-22	4	prpf19
p4ha1b1	1.2489e-26	0.410076	0.647	0.279	2.04995e-22	4	p4ha1b
cd151l	1.2975e-26	0.173304	0.17	0.045	2.12971e-22	3	cd151l
eya2	1.35789e-26	0.142443	0.507	0.326	2.22885e-22	0	eya2
amotl2b	1.36396e-26	0.447867	0.335	0.217	2.2388e-22	1	amotl2b
calm3b	1.40716e-26	0.357291	0.841	0.422	2.30971e-22	4	calm3b
ADGRL3	1.61576e-26	0.136608	0.546	0.362	2.65212e-22	0	ADGRL3
atf3	1.92331e-26	0.170257	0.547	0.36	3.15692e-22	0	atf3
dhrs13l1	1.92685e-26	0.169627	0.326	0.182	3.16273e-22	1	dhrs13l1
eif3ba	1.93747e-26	0.139666	0.56	0.349	3.18016e-22	0	eif3ba
atp5po	1.93908e-26	0.165104	0.751	0.548	3.1828e-22	0	atp5po
shroom2a	1.97115e-26	0.127335	0.248	0.124	3.23545e-22	0	shroom2a
ptges3b	2.00019e-26	0.202654	0.237	0.052	3.28311e-22	4	ptges3b
srprb	2.15443e-26	0.27068	0.483	0.17	3.53628e-22	4	srprb
lasp1	2.17996e-26	0.296266	0.436	0.215	3.57819e-22	3	lasp1
cux1a	2.19502e-26	0.258966	0.434	0.222	3.60291e-22	3	cux1a
cycsb1	2.20339e-26	0.330202	0.652	0.274	3.61664e-22	4	cycsb
tuft1a1	2.6564e-26	0.260185	0.291	0.115	4.36021e-22	3	tuft1a
mt-atp6	2.71452e-26	0.146612	0.998	0.994	4.45562e-22	0	mt-atp6
prelid3b	2.89685e-26	0.127078	0.47	0.281	4.75489e-22	0	prelid3b
ptprfb1	2.95383e-26	0.310708	0.727	0.64	4.84841e-22	2	ptprfb
ubb	2.97925e-26	0.467095	0.626	0.54	4.89015e-22	1	ubb
ahcy	3.00067e-26	0.134596	0.221	0.101	4.92531e-22	0	ahcy
ston2	3.00264e-26	0.125348	0.371	0.217	4.92853e-22	0	ston2
cyp2p6	3.05989e-26	0.209945	0.183	0.015	5.02251e-22	5	cyp2p6
sept9a	3.20942e-26	0.334697	0.494	0.399	5.26794e-22	1	sept9a
rps151	3.2403e-26	0.120824	1	1	5.31863e-22	2	rps15
tcf3b	3.30712e-26	0.182183	0.333	0.194	5.42831e-22	1	tcf3b
cyp2p7	3.56292e-26	0.132874	0.155	0.011	5.84817e-22	5	cyp2p7
ccl19a.1	3.78923e-26	0.148774	0.104	0.018	6.21964e-22	3	ccl19a.1
tuba1b	3.85836e-26	0.14675	0.112	0.022	6.33312e-22	3	tuba1b
si:ch211-269k10.2	3.87998e-26	0.109893	0.214	0.098	6.36861e-22	0	si:ch211-269k10.2
her15.2	3.89275e-26	0.50412	0.201	0.091	6.38956e-22	0	her15.2
cenpx	4.49919e-26	0.127783	0.087	0.007	7.38498e-22	4	cenpx
rpl241	4.94206e-26	0.128383	1	1	8.11189e-22	2	rpl24
her9	5.25773e-26	0.430826	0.641	0.379	8.63004e-22	3	her9
ilf2	5.31744e-26	0.323296	0.43	0.149	8.72805e-22	4	ilf2
cdkn1bb	5.37181e-26	0.150477	0.351	0.196	8.81729e-22	0	cdkn1bb
mt-nd2	5.44709e-26	0.18058	0.958	0.88	8.94085e-22	0	mt-nd2
phb	6.72363e-26	0.244023	0.353	0.104	1.10362e-21	4	phb
api5	6.74342e-26	0.227906	0.382	0.117	1.10686e-21	4	api5
mt-nd22	7.05976e-26	0.34093	0.976	0.905	1.15879e-21	4	mt-nd2
atp11a	7.45747e-26	0.137477	0.156	0.041	1.22407e-21	3	atp11a
dpp7	7.48393e-26	0.183849	0.364	0.221	1.22841e-21	1	dpp7
zgc:153867	7.84393e-26	0.366235	0.8	0.56	1.2875e-21	3	zgc:153867
phldb2b	7.89208e-26	0.151439	0.263	0.134	1.29541e-21	1	phldb2b
mpped2	8.34823e-26	0.120133	0.299	0.161	1.37028e-21	0	mpped2
RPS171	9.08709e-26	0.137268	1	0.999	1.49155e-21	2	RPS17
egr11	9.29448e-26	0.476715	0.837	0.646	1.5256e-21	3	egr1
rbbp9	9.66134e-26	0.140888	0.227	0.107	1.58581e-21	0	rbbp9
gpx1a	9.79496e-26	0.190305	0.189	0.057	1.60774e-21	3	gpx1a
mt-nd3	9.81475e-26	0.163009	0.609	0.409	1.61099e-21	0	mt-nd3
apcdd1l	1.02109e-25	0.144302	0.155	0.011	1.67602e-21	5	apcdd1l
atp5if1a	1.19087e-25	0.150539	0.447	0.26	1.95469e-21	0	atp5if1a
uqcrb	1.30978e-25	0.138144	0.58	0.375	2.14988e-21	0	uqcrb
edem1	1.32792e-25	0.220346	0.372	0.234	2.17964e-21	1	edem1
pnp5a	1.36321e-25	0.186722	0.746	0.546	2.23757e-21	0	pnp5a
slc12a4	1.39298e-25	0.133433	0.165	0.045	2.28644e-21	3	slc12a4
ap1b1	1.46079e-25	0.127009	0.13	0.029	2.39774e-21	3	ap1b1
aclya	1.61867e-25	0.137361	0.128	0.028	2.65688e-21	3	aclya
gmpr2	1.63899e-25	0.151907	0.642	0.416	2.69024e-21	0	gmpr2
cct51	1.69497e-25	0.348162	0.739	0.351	2.78212e-21	4	cct5
srsf2a	1.87669e-25	0.305425	0.444	0.152	3.08039e-21	4	srsf2a
hnrnpa0b	1.90424e-25	0.356324	0.884	0.48	3.12561e-21	4	hnrnpa0b
uqcrc2b	1.92258e-25	0.133625	0.261	0.128	3.15572e-21	0	uqcrc2b
snrpc	2.01085e-25	0.240714	0.348	0.104	3.30062e-21	4	snrpc
btbd6a	2.03053e-25	0.117843	0.462	0.288	3.33291e-21	0	btbd6a
zgc:162171	2.1087e-25	0.102062	0.187	0.08	3.46121e-21	0	zgc:162171
hdlbpa1	2.11585e-25	0.4098	0.423	0.077	3.47295e-21	5	hdlbpa
id2b1	2.1752e-25	0.618329	0.275	0.112	3.57038e-21	3	id2b
zmp:0000001114	2.24132e-25	0.123014	0.174	0.049	3.6789e-21	3	zmp:0000001114
antxr2a	2.36548e-25	0.139368	0.24	0.119	3.8827e-21	1	antxr2a
lsm7	2.541e-25	0.244216	0.411	0.134	4.1708e-21	4	lsm7
marcksl1b1	2.63119e-25	0.199226	0.92	0.742	4.31884e-21	2	marcksl1b
si:dkey-112e7.21	2.65263e-25	0.25069	0.319	0.134	4.35402e-21	3	si:dkey-112e7.2
ch25hl3	3.80281e-25	0.263915	0.291	0.118	6.24193e-21	3	ch25hl3
tspan4a	3.9267e-25	0.232944	0.323	0.192	6.44529e-21	1	tspan4a
mt-atp61	4.31163e-25	0.16613	1	0.995	7.07712e-21	2	mt-atp6
eif5a21	4.9092e-25	0.347399	0.599	0.247	8.05797e-21	4	eif5a2
morf4l1	4.9498e-25	0.26862	0.585	0.228	8.1246e-21	4	morf4l1
rpl351	5.09396e-25	0.143202	1	0.998	8.36123e-21	2	rpl35
lrp1aa1	5.22462e-25	0.304462	0.56	0.229	8.5757e-21	4	lrp1aa
rps31	5.71327e-25	0.152383	1	0.998	9.37777e-21	2	rps3
prps1a	6.56391e-25	0.132933	0.584	0.366	1.0774e-20	0	prps1a
mhc1zba	7.38225e-25	0.234168	0.774	0.75	1.21172e-20	1	mhc1zba
wee1	7.38576e-25	0.160195	0.203	0.043	1.2123e-20	4	wee1
e2f3	8.05309e-25	0.147445	0.174	0.032	1.32183e-20	4	e2f3
tbc1d16	8.21041e-25	0.112943	0.178	0.074	1.34766e-20	1	tbc1d16
rbpjb	8.61588e-25	0.124646	0.291	0.158	1.41421e-20	0	rbpjb
arg2	8.89923e-25	0.132205	0.188	0.083	1.46072e-20	0	arg2
rb1	9.63199e-25	0.103927	0.087	0.008	1.58099e-20	4	rb1
rps161	1.01743e-24	0.129787	1	1	1.67002e-20	2	rps16
sync	1.04922e-24	0.119428	0.165	0.067	1.72218e-20	1	sync
ifi301	1.0745e-24	0.355166	0.687	0.406	1.76369e-20	3	ifi30
dnmt3ba	1.1575e-24	0.120108	0.145	0.023	1.89992e-20	4	dnmt3ba
tmem88b	1.21418e-24	0.140204	0.134	0.031	1.99295e-20	3	tmem88b
hopx	1.35483e-24	0.209876	0.15	0.039	2.22382e-20	3	hopx
hnrnpr	1.3894e-24	0.271921	0.415	0.142	2.28056e-20	4	hnrnpr
hspa9	1.55811e-24	0.302791	0.585	0.24	2.55748e-20	4	hspa9
sh3gl3b	1.55993e-24	0.278979	0.348	0.159	2.56046e-20	3	sh3gl3b
atf4b	1.64806e-24	0.182608	0.877	0.747	2.70513e-20	0	atf4b
btf3l4	1.72317e-24	0.134486	0.352	0.198	2.82841e-20	0	btf3l4
cox7b	1.74577e-24	0.189958	0.553	0.373	2.8655e-20	0	cox7b
daam1a	2.01209e-24	0.15347	0.47	0.311	3.30265e-20	0	daam1a
ace1	2.02917e-24	0.314969	0.324	0.049	3.33068e-20	5	ace
trmt112	2.08805e-24	0.249222	0.372	0.117	3.42732e-20	4	trmt112
usp1	2.08942e-24	0.175511	0.203	0.043	3.42958e-20	4	usp1
tnfsf10l	2.34105e-24	0.148239	0.127	0.008	3.84261e-20	5	tnfsf10l
lhfpl2a	2.66544e-24	0.148552	0.242	0.089	4.37505e-20	3	lhfpl2a
rrs1	2.84187e-24	0.23952	0.261	0.067	4.66465e-20	4	rrs1
tsr21	2.93901e-24	0.286145	0.459	0.167	4.82409e-20	4	tsr2
csde1	2.94037e-24	0.133348	0.358	0.205	4.82633e-20	0	csde1
usp10	3.0538e-24	0.224618	0.425	0.143	5.01251e-20	4	usp10
plscr3b	3.07066e-24	0.167926	0.2	0.063	5.04018e-20	3	plscr3b
rhoab	3.1529e-24	0.387672	0.294	0.181	5.17517e-20	1	rhoab
adamts21	3.26869e-24	0.236699	0.41	0.206	5.36523e-20	3	adamts2
tcp11	3.42934e-24	0.348285	0.792	0.403	5.62892e-20	4	tcp1
gnb2	3.66964e-24	0.11807	0.156	0.043	6.02335e-20	3	gnb2
eif3c	3.6777e-24	0.142457	0.407	0.244	6.03658e-20	0	eif3c
si:dkey-58f10.4	3.83124e-24	0.103276	0.099	0.018	6.2886e-20	3	si:dkey-58f10.4
ctsla	4.24514e-24	0.248289	0.847	0.699	6.96797e-20	0	ctsla
ndufa12	4.47196e-24	0.239517	0.42	0.143	7.34027e-20	4	ndufa12
rrp9	4.56203e-24	0.142475	0.164	0.029	7.48812e-20	4	rrp9
gmpr21	4.58611e-24	0.400132	0.85	0.481	7.52764e-20	4	gmpr2
ndufv2	4.74362e-24	0.253069	0.396	0.132	7.78617e-20	4	ndufv2
rpl35a1	4.99171e-24	0.138588	1	1	8.19339e-20	2	rpl35a
ccdc3a	5.38926e-24	0.201123	0.432	0.29	8.84592e-20	1	ccdc3a
sf3b5	5.43449e-24	0.228733	0.324	0.095	8.92018e-20	4	sf3b5
ralab	6.09419e-24	0.239785	0.438	0.234	1.0003e-19	3	ralab
atp5f1b	7.20619e-24	0.373954	0.971	0.756	1.18282e-19	4	atp5f1b
fam207a1	7.21686e-24	0.30067	0.411	0.146	1.18458e-19	4	fam207a
gbp1	7.6638e-24	0.196662	0.213	0.102	1.25794e-19	1	gbp1
rps191	8.36255e-24	0.124778	1	1	1.37263e-19	2	rps19
si:dkey-51e6.1	8.40874e-24	0.190234	0.209	0.071	1.38021e-19	3	si:dkey-51e6.1
aldh7a1	8.67269e-24	0.267944	0.43	0.151	1.42354e-19	4	aldh7a1
alcamb	8.77045e-24	0.282632	0.348	0.168	1.43958e-19	3	alcamb
got2b	8.86863e-24	0.140975	0.285	0.152	1.4557e-19	0	got2b
hypk1	9.66062e-24	0.272403	0.599	0.247	1.58569e-19	4	hypk
plekhg2	9.76386e-24	0.113496	0.161	0.045	1.60264e-19	3	plekhg2
reep3a	9.94047e-24	0.127945	0.172	0.051	1.63163e-19	3	reep3a
appa	1.06506e-23	0.133031	0.984	0.912	1.74819e-19	0	appa
chchd6b	1.07639e-23	0.130935	0.354	0.201	1.76679e-19	0	chchd6b
glis2a	1.09391e-23	0.111781	0.154	0.042	1.79554e-19	3	glis2a
atp5mc3a1	1.13573e-23	0.353043	0.87	0.483	1.86418e-19	4	atp5mc3a
errfi1a	1.18673e-23	0.245796	0.386	0.252	1.94791e-19	1	errfi1a
dohh	1.2143e-23	0.108055	0.134	0.048	1.99315e-19	0	dohh
ncl	1.28361e-23	0.176264	0.759	0.552	2.10692e-19	0	ncl
map7d1a	1.28809e-23	0.180377	0.357	0.223	2.11427e-19	1	map7d1a
fkbp4	1.56728e-23	0.213549	0.271	0.072	2.57254e-19	4	fkbp4
arhgdia	1.66123e-23	0.25474	0.507	0.193	2.72674e-19	4	arhgdia
slc20a1b	1.89577e-23	0.247059	0.304	0.088	3.11172e-19	4	slc20a1b
rer1	1.89665e-23	0.206345	0.309	0.089	3.11316e-19	4	rer1
sall1a	1.90398e-23	0.121019	0.355	0.213	3.12519e-19	0	sall1a
cpn1.11	1.92207e-23	0.259757	0.367	0.12	3.15489e-19	4	cpn1.1
si:dkey-180p18.9	1.92606e-23	0.141282	0.331	0.187	3.16144e-19	0	si:dkey-180p18.9
itga6b	1.96106e-23	0.15631	0.2	0.067	3.21888e-19	3	itga6b
acp1	2.0274e-23	0.154923	0.188	0.039	3.32777e-19	4	acp1
irf2bpl	2.04233e-23	0.234059	0.333	0.204	3.35227e-19	1	irf2bpl
eif3ba1	2.06117e-23	0.346097	0.778	0.409	3.38321e-19	4	eif3ba
ier5	2.09036e-23	0.163062	0.699	0.497	3.43112e-19	0	ier5
ddx4	2.13384e-23	0.156066	0.055	0.005	3.50248e-19	3	ddx4
tuba8l4	2.27937e-23	0.410796	0.483	0.4	3.74136e-19	1	tuba8l4
srpk1a	2.34712e-23	0.165309	0.408	0.267	3.85257e-19	1	srpk1a
cox7a2a1	2.44822e-23	0.276579	0.599	0.248	4.01851e-19	4	cox7a2a
scn4ba	2.45696e-23	0.132643	0.141	0.01	4.03286e-19	5	scn4ba
ube2nb1	2.47897e-23	0.309389	0.522	0.209	4.06898e-19	4	ube2nb
polr2eb	2.61701e-23	0.235644	0.357	0.114	4.29556e-19	4	polr2eb
2020-06-01	2.76586e-23	0.348675	0.978	0.928	4.53989e-19	3	jun
pbx4	3.0403e-23	0.270078	0.359	0.17	4.99035e-19	3	pbx4
smc1al	3.24101e-23	0.287258	0.469	0.177	5.3198e-19	4	smc1al
s100u	3.2953e-23	0.160121	0.417	0.268	5.40891e-19	0	s100u
pms1	3.40445e-23	0.107004	0.14	0.023	5.58807e-19	4	pms1
srsf11	3.53009e-23	0.238745	0.43	0.152	5.79429e-19	4	srsf11
dynll1	3.54486e-23	0.351048	0.289	0.117	5.81854e-19	3	dynll1
myh10	3.68428e-23	0.23883	0.438	0.309	6.04738e-19	1	myh10
cdc14ab	3.94916e-23	0.123317	0.224	0.11	6.48215e-19	1	cdc14ab
rida	4.2449e-23	0.189339	0.222	0.052	6.96758e-19	4	rida
ecm2	4.65456e-23	0.205812	0.239	0.029	7.64e-19	5	ecm2
rhoq	4.84344e-23	0.186362	0.382	0.248	7.95003e-19	1	rhoq
ndufb5	4.92862e-23	0.287297	0.71	0.324	8.08984e-19	4	ndufb5
fxyd6l1	6.02356e-23	0.28606	0.762	0.604	9.88707e-19	2	fxyd6l
akap13	6.16284e-23	0.134102	0.436	0.28	1.01157e-18	0	akap13
rpl26	6.36123e-23	0.147714	0.274	0.149	1.04413e-18	0	rpl26
utp3	6.39497e-23	0.124419	0.205	0.095	1.04967e-18	0	utp3
calm1a	6.51812e-23	0.311324	0.493	0.396	1.06988e-18	1	calm1a
rbbp6	6.93346e-23	0.129011	0.328	0.185	1.13806e-18	0	rbbp6
dsc2l1	7.20232e-23	0.252792	0.496	0.291	1.18219e-18	3	dsc2l
mycn1	7.45515e-23	0.210039	0.348	0.159	1.22369e-18	3	mycn
rpl71	7.48698e-23	0.120829	1	1	1.22891e-18	2	rpl7
hsf2	7.5919e-23	0.129794	0.346	0.195	1.24613e-18	0	hsf2
pdha1a	8.07987e-23	0.24273	0.478	0.179	1.32623e-18	4	pdha1a
prps1a1	8.27404e-23	0.356797	0.802	0.428	1.3581e-18	4	prps1a
rpl381	8.30121e-23	0.165588	0.999	0.998	1.36256e-18	2	rpl38
fmnl2a	8.33245e-23	0.107953	0.205	0.099	1.36769e-18	0	fmnl2a
ptmab	8.43419e-23	0.183468	0.724	0.534	1.38439e-18	0	ptmab
serpine3	8.5429e-23	0.119217	0.141	0.01	1.40223e-18	5	serpine3
si:ch211-15b10.61	8.90688e-23	0.280385	0.344	0.158	1.46197e-18	3	si:ch211-15b10.6
gcat	9.77501e-23	0.196052	0.213	0.05	1.60447e-18	4	gcat
phc2a	9.91947e-23	0.183166	0.167	0.049	1.62818e-18	3	phc2a
hmgn21	9.92917e-23	0.37696	0.792	0.446	1.62977e-18	4	hmgn2
emx2	1.04597e-22	0.287319	0.598	0.538	1.71686e-18	1	emx2
si:zfos-464b6.2	1.07764e-22	0.126673	0.435	0.263	1.76884e-18	0	si:zfos-464b6.2
prdx21	1.07835e-22	0.385855	0.899	0.542	1.77e-18	4	prdx2
pxna	1.10781e-22	0.10746	0.106	0.022	1.81836e-18	3	pxna
hirip3	1.12926e-22	0.186688	0.155	0.028	1.85356e-18	4	hirip3
wipf1b	1.24182e-22	0.127118	0.266	0.14	2.03832e-18	0	wipf1b
si:dkey-79d12.5	1.33304e-22	0.109968	0.189	0.087	2.18805e-18	0	si:dkey-79d12.5
ncl1	1.39311e-22	0.398963	0.942	0.612	2.28665e-18	4	ncl
rbm47	1.39614e-22	0.108569	0.141	0.037	2.29162e-18	3	rbm47
ndufs8a	1.47045e-22	0.124472	0.345	0.197	2.4136e-18	0	ndufs8a
PLEKHH3	1.48454e-22	0.118419	0.449	0.289	2.43672e-18	0	PLEKHH3
zgc:112496	1.52901e-22	0.178103	0.256	0.069	2.50972e-18	4	zgc:112496
wdr43	1.62448e-22	0.240094	0.372	0.125	2.66642e-18	4	wdr43
cad	1.84518e-22	0.263428	0.861	0.796	3.02867e-18	2	cad
chtopb	1.9034e-22	0.104931	0.162	0.069	3.12424e-18	0	chtopb
fzd2	1.90506e-22	0.245719	0.324	0.053	3.12696e-18	5	fzd2
dldh	1.92971e-22	0.127216	0.339	0.194	3.16742e-18	0	dldh
cnbpa1	1.945e-22	0.347955	0.879	0.496	3.19252e-18	4	cnbpa
rap1b	1.98832e-22	0.195272	0.286	0.119	3.26364e-18	3	rap1b
hnrnpa0l.1	2.05007e-22	0.218985	0.709	0.526	3.36498e-18	0	hnrnpa0l.1
tufm	2.21344e-22	0.248459	0.367	0.123	3.63314e-18	4	tufm
idh3b	2.27261e-22	0.216213	0.319	0.097	3.73026e-18	4	idh3b
zmp:0000000912	2.35528e-22	0.165124	0.192	0.065	3.86596e-18	3	zmp:0000000912
cct8	2.66618e-22	0.119436	0.226	0.112	4.37627e-18	0	cct8
gadd45bb	2.68883e-22	0.380504	0.204	0.1	4.41345e-18	0	gadd45bb
pleca1	2.69519e-22	0.378645	0.521	0.125	4.42388e-18	5	pleca
tnfrsf19	2.77098e-22	0.178702	0.225	0.116	4.54828e-18	1	tnfrsf19
xirp2a1	2.91409e-22	0.225129	0.396	0.143	4.78319e-18	4	xirp2a
tspan3a	3.06655e-22	0.248565	0.392	0.192	5.03344e-18	3	tspan3a
mrpl27	3.24044e-22	0.149751	0.169	0.033	5.31886e-18	4	mrpl27
sox11b	3.28093e-22	0.100318	0.059	0.007	5.38532e-18	3	sox11b
srsf6b	3.32923e-22	0.211496	0.401	0.138	5.46459e-18	4	srsf6b
si:ch211-214p13.9	3.33458e-22	0.141033	0.174	0.055	5.47338e-18	3	si:ch211-214p13.9
sf3b4	3.56329e-22	0.137446	0.155	0.028	5.84879e-18	4	sf3b4
atic	3.60743e-22	0.160889	0.15	0.027	5.92124e-18	4	atic
rpl271	4.24264e-22	0.127837	1	0.999	6.96386e-18	2	rpl27
lyar	4.3239e-22	0.189523	0.193	0.043	7.09725e-18	4	lyar
rnf213b	4.45879e-22	0.22389	0.269	0.113	7.31866e-18	3	rnf213b
bzw1b	4.48346e-22	0.185795	0.493	0.324	7.35916e-18	0	bzw1b
uqcrh	4.59178e-22	0.129356	0.617	0.416	7.53695e-18	0	uqcrh
utp31	4.70001e-22	0.249056	0.367	0.124	7.7146e-18	4	utp3
polr2l	4.78952e-22	0.259822	0.498	0.197	7.86152e-18	4	polr2l
abhd15a	5.51967e-22	0.199392	0.22	0.083	9.05998e-18	3	abhd15a
tuft1a	5.58388e-22	0.135131	0.207	0.1	9.16538e-18	1	tuft1a
anapc5	5.63238e-22	0.210928	0.242	0.065	9.24499e-18	4	anapc5
gapdhs1	5.72046e-22	0.236185	0.855	0.831	9.38956e-18	2	gapdhs
rps241	5.82899e-22	0.120361	1	1	9.56771e-18	2	rps24
pcf11	6.08268e-22	0.128266	0.245	0.127	9.98412e-18	0	pcf11
pard6a	6.13904e-22	0.111121	0.134	0.035	1.00766e-17	3	pard6a
actb2	6.14645e-22	0.147627	0.999	0.999	1.00888e-17	0	actb2
mrpl42	6.45846e-22	0.10334	0.144	0.057	1.06009e-17	0	mrpl42
selenop	6.58012e-22	0.153203	0.955	0.938	1.08006e-17	1	selenop
ptp4a1	6.63709e-22	0.166582	0.187	0.062	1.08941e-17	3	ptp4a1
nfybb	7.16442e-22	0.192289	0.251	0.102	1.17597e-17	3	nfybb
uchl1	7.65328e-22	0.221138	0.119	0.028	1.25621e-17	3	uchl1
acat11	8.03173e-22	0.221708	0.382	0.13	1.31833e-17	4	acat1
prelid1a	8.17348e-22	0.222693	0.319	0.1	1.3416e-17	4	prelid1a
prdx2	8.60311e-22	0.182125	0.677	0.49	1.41211e-17	0	prdx2
acp61	9.76944e-22	0.227241	0.517	0.219	1.60356e-17	4	acp6
pabpn1	1.01957e-21	0.318828	0.778	0.398	1.67353e-17	4	pabpn1
rad9a	1.14124e-21	0.112852	0.145	0.026	1.87323e-17	4	rad9a
asf1bb	1.25172e-21	0.169222	0.15	0.028	2.05457e-17	4	asf1bb
psma3	1.25429e-21	0.24413	0.512	0.205	2.05879e-17	4	psma3
f3b1	1.2615e-21	0.499007	0.698	0.476	2.07063e-17	3	f3b
afdna	1.29433e-21	0.237911	0.39	0.208	2.12452e-17	3	afdna
eno3	1.30682e-21	0.163801	0.231	0.118	2.14502e-17	0	eno3
mcl1b	1.3441e-21	0.194518	0.438	0.284	2.20621e-17	0	mcl1b
mcl1a1	1.40633e-21	0.388545	0.896	0.697	2.30835e-17	3	mcl1a
psmd7	1.50208e-21	0.209598	0.367	0.122	2.46551e-17	4	psmd7
mxra8b	1.54971e-21	0.141531	0.155	0.013	2.54369e-17	5	mxra8b
atp5f1c	1.64352e-21	0.141054	0.745	0.534	2.69768e-17	0	atp5f1c
uqcr101	1.71695e-21	0.303582	0.512	0.205	2.81821e-17	4	uqcr10
CR589944.1	1.73166e-21	0.115438	0.209	0.101	2.84235e-17	0	CR589944.1
her4.2	1.77007e-21	0.137063	0.244	0.129	2.90539e-17	0	her4.2
ca8	1.77616e-21	0.119204	0.148	0.042	2.91539e-17	3	ca8
fn1a	1.86966e-21	0.111043	0.137	0.037	3.06886e-17	3	fn1a
ppfibp1b	1.94528e-21	0.103152	0.412	0.263	3.19298e-17	0	ppfibp1b
eif5a	1.98753e-21	0.173118	0.655	0.461	3.26233e-17	0	eif5a
srgn	2.12692e-21	0.138514	0.064	0.008	3.49113e-17	3	srgn
steap4	2.19141e-21	0.157827	0.17	0.054	3.59699e-17	3	steap4
khdrbs1a	2.21149e-21	0.40718	0.884	0.538	3.62994e-17	4	khdrbs1a
capns1b1	2.41072e-21	0.285598	0.5	0.28	3.95696e-17	3	capns1b
arpc4	2.41314e-21	0.157225	0.211	0.075	3.96092e-17	3	arpc4
mrpl54	2.48852e-21	0.250261	0.464	0.179	4.08466e-17	4	mrpl54
atp5if1a1	2.51598e-21	0.354668	0.662	0.312	4.12973e-17	4	atp5if1a
b2ml	2.59977e-21	0.161693	0.949	0.944	4.26726e-17	1	b2ml
dnajb1b1	2.72611e-21	0.393012	0.808	0.603	4.47463e-17	3	dnajb1b
sult1st6	2.80579e-21	0.154606	0.237	0.126	4.60542e-17	1	sult1st6
rps101	2.82237e-21	0.10608	1	1	4.63264e-17	2	rps10
atp5md	2.83576e-21	0.306396	0.623	0.284	4.65461e-17	4	atp5md
rpl7l1	2.90122e-21	0.222301	0.362	0.123	4.76206e-17	4	rpl7l1
nt5e	3.10075e-21	0.152125	0.169	0.016	5.08957e-17	5	nt5e
celsr1a	3.11059e-21	0.124446	0.39	0.25	5.10573e-17	0	celsr1a
bckdha	3.12812e-21	0.218359	0.324	0.103	5.1345e-17	4	bckdha
timp2a1	3.20892e-21	0.372683	0.923	0.607	5.26711e-17	4	timp2a
tmsb	3.30147e-21	0.113635	0.081	0.014	5.41904e-17	3	tmsb
atp5mc1	3.30527e-21	0.139818	0.438	0.267	5.42528e-17	0	atp5mc1
mob2a	3.41126e-21	0.100621	0.218	0.111	5.59924e-17	0	mob2a
colec111	3.42031e-21	0.337605	0.711	0.617	5.6141e-17	2	colec11
CT956002.2	3.43864e-21	0.133318	0.183	0.061	5.64419e-17	3	CT956002.2
hephl1a	3.64071e-21	0.162634	0.302	0.134	5.97587e-17	3	hephl1a
metrn	3.83975e-21	0.266882	0.571	0.502	6.30257e-17	1	metrn
ptbp31	3.93803e-21	0.324533	0.749	0.444	6.46388e-17	4	ptbp3
mrpl13	3.99078e-21	0.155091	0.217	0.053	6.55047e-17	4	mrpl13
rbl1	4.16427e-21	0.133522	0.179	0.039	6.83523e-17	4	rbl1
tnrc6c1	4.92965e-21	0.302755	0.509	0.3	8.09153e-17	3	tnrc6c1
esr1	4.94883e-21	0.123361	0.159	0.048	8.12301e-17	3	esr1
rpia	5.07084e-21	0.213316	0.28	0.083	8.32328e-17	4	rpia
col4a51	5.08112e-21	0.247828	0.852	0.795	8.34014e-17	2	col4a5
tax1bp3	5.17956e-21	0.155923	0.225	0.084	8.50172e-17	3	tax1bp3
lfng	5.74104e-21	0.143995	0.197	0.096	9.42334e-17	0	lfng
gfpt11	5.75387e-21	0.177372	0.256	0.073	9.44441e-17	4	gfpt1
si:dkey-16p21.8	5.96073e-21	0.113687	0.161	0.07	9.78393e-17	0	si:dkey-16p21.8
nhsl1a	6.05492e-21	0.179644	0.229	0.09	9.93854e-17	3	nhsl1a
cast	6.45166e-21	0.210297	0.271	0.112	1.05898e-16	3	cast
si:dkeyp-72g9.4	6.65704e-21	0.106121	0.149	0.062	1.09269e-16	1	si:dkeyp-72g9.4
cyp19a1a	7.57571e-21	0.538279	0.169	0.017	1.24348e-16	5	cyp19a1a
egr4	7.61144e-21	0.436596	0.079	0.014	1.24934e-16	3	egr4
drg2	7.82439e-21	0.108795	0.164	0.072	1.2843e-16	0	drg2
cbsb	7.97606e-21	0.13302	0.223	0.118	1.30919e-16	0	cbsb
snrpa1	8.41982e-21	0.187437	0.246	0.067	1.38203e-16	4	snrpa1
ruvbl1	8.88363e-21	0.154723	0.169	0.035	1.45816e-16	4	ruvbl1
kars	8.9785e-21	0.233494	0.473	0.185	1.47373e-16	4	kars
canx	9.18632e-21	0.231487	0.411	0.151	1.50784e-16	4	canx
CR936442.1	9.19929e-21	0.109339	0.07	0.003	1.50997e-16	5	CR936442.1
gulp1a	9.32374e-21	0.143418	0.315	0.19	1.5304e-16	1	gulp1a
nme31	9.33244e-21	0.215355	0.309	0.098	1.53183e-16	4	nme3
rpl181	9.74357e-21	0.11191	1	1	1.59931e-16	2	rpl18
nop56	9.75758e-21	0.12616	0.559	0.372	1.60161e-16	0	nop56
tpt11	1.05488e-20	0.161617	0.979	0.962	1.73148e-16	2	tpt1
CABZ01115113.1	1.07809e-20	0.164475	0.232	0.06	1.76957e-16	4	CABZ01115113.1
dido1	1.08964e-20	0.106354	0.447	0.278	1.78853e-16	0	dido1
olfml3b	1.09415e-20	0.114074	0.204	0.102	1.79594e-16	1	olfml3b
denr	1.2109e-20	0.28002	0.469	0.192	1.98757e-16	4	denr
pfdn4	1.23258e-20	0.122915	0.212	0.107	2.02316e-16	0	pfdn4
sdc41	1.25411e-20	0.378049	0.782	0.554	2.05849e-16	3	sdc4
si:dkey-93n13.1	1.2612e-20	0.101682	0.136	0.055	2.07013e-16	0	si:dkey-93n13.1
atp5f1d	1.30718e-20	0.127593	0.674	0.473	2.1456e-16	0	atp5f1d
celf21	1.32656e-20	0.255696	0.366	0.071	2.17742e-16	5	celf2
sox4a.11	1.44358e-20	0.306958	0.282	0.043	2.36949e-16	5	sox4a.1
nucb2b	1.46062e-20	0.105844	0.143	0.06	2.39746e-16	0	nucb2b
mfge8a	1.53204e-20	0.121563	0.145	0.042	2.51469e-16	3	mfge8a
tktb	1.5771e-20	0.115072	0.294	0.165	2.58865e-16	0	tktb
si:ch211-66k16.27	1.59727e-20	0.148512	0.218	0.084	2.62176e-16	3	si:ch211-66k16.27
BX088707.3	1.77065e-20	0.159519	0.085	0.004	2.90635e-16	5	BX088707.3
suclg1	1.78062e-20	0.109819	0.266	0.143	2.92271e-16	0	suclg1
mif	1.80499e-20	0.254899	0.556	0.24	2.96271e-16	4	mif
mhc2b1	1.83046e-20	0.338228	0.385	0.198	3.00452e-16	3	mhc2b
timeless	1.95442e-20	0.139581	0.14	0.026	3.20799e-16	4	timeless
zfhx3	1.97144e-20	0.156204	0.575	0.418	3.23593e-16	0	zfhx3
uqcrc2a	2.08647e-20	0.114476	0.175	0.08	3.42474e-16	0	uqcrc2a
pbdc1	2.09115e-20	0.11993	0.33	0.192	3.43241e-16	0	pbdc1
ackr4b	2.10152e-20	0.243701	0.627	0.566	3.44943e-16	1	ackr4b
cox7a2l	2.11015e-20	0.118994	0.345	0.203	3.4636e-16	0	cox7a2l
rpl37.11	2.11383e-20	0.133352	1	1	3.46963e-16	2	rpl37.1
mxra8a1	2.28839e-20	0.282548	0.437	0.093	3.75616e-16	5	mxra8a
nop16	2.54747e-20	0.203533	0.304	0.095	4.18141e-16	4	nop16
junba1	2.63235e-20	0.324545	0.947	0.817	4.32073e-16	3	junba
tspan18a1	2.76364e-20	0.276308	0.585	0.28	4.53623e-16	4	tspan18a
osbpl10b	2.83764e-20	0.154495	0.207	0.077	4.6577e-16	3	osbpl10b
sh3bgrl3	2.84234e-20	0.179794	0.203	0.074	4.66541e-16	3	sh3bgrl3
pinx1	2.87476e-20	0.109613	0.189	0.09	4.71864e-16	0	pinx1
aars	2.89382e-20	0.153337	0.217	0.055	4.74992e-16	4	aars
col4a61	3.25945e-20	0.273868	0.766	0.712	5.35006e-16	2	col4a6
rps211	3.31282e-20	0.140045	1	1	5.43766e-16	2	rps21
chchd6b1	3.76036e-20	0.262135	0.556	0.243	6.17226e-16	4	chchd6b
ndufab1b	3.76736e-20	0.252172	0.531	0.224	6.18374e-16	4	ndufab1b
cox8a	3.82828e-20	0.321496	0.937	0.699	6.28374e-16	4	cox8a
nos1apa.1	4.21375e-20	0.175623	0.417	0.293	6.91644e-16	1	nos1apa.1
id1	4.99739e-20	0.431667	0.509	0.416	8.20271e-16	1	id1
clk4a	5.16957e-20	0.132045	0.26	0.145	8.48533e-16	0	clk4a
fam32a	5.24233e-20	0.123683	0.338	0.202	8.60476e-16	0	fam32a
ppp1r10	5.26933e-20	0.207407	0.253	0.109	8.64907e-16	3	ppp1r10
b2ml2	5.47901e-20	0.235236	0.985	0.941	8.99325e-16	3	b2ml
nasp	5.51994e-20	0.28056	0.169	0.036	9.06043e-16	4	nasp
zgc:193541	5.64543e-20	0.13645	0.685	0.493	9.26642e-16	0	zgc:193541
sumo3a	6.49477e-20	0.286901	0.638	0.291	1.06605e-15	4	sumo3a
pes	6.67315e-20	0.208111	0.329	0.109	1.09533e-15	4	pes
fkbp7	6.88917e-20	0.113013	0.141	0.041	1.13079e-15	3	fkbp7
magoh	7.31001e-20	0.226872	0.454	0.177	1.19987e-15	4	magoh
aplp2	7.47763e-20	0.341482	0.529	0.336	1.22738e-15	3	aplp2
jund	7.565e-20	0.38046	0.681	0.493	1.24172e-15	3	jund
g3bp1	7.66112e-20	0.231433	0.28	0.085	1.2575e-15	4	g3bp1
ddit3	7.70191e-20	0.397128	0.602	0.538	1.26419e-15	1	ddit3
eif6	7.9305e-20	0.126705	0.268	0.151	1.30171e-15	0	eif6
ERC1	7.99318e-20	0.118657	0.139	0.04	1.312e-15	3	ERC1
nutf2	8.58554e-20	0.197194	0.222	0.059	1.40923e-15	4	nutf2
dhrs3b	9.00192e-20	0.120226	0.158	0.07	1.47757e-15	1	dhrs3b
ctsh	9.00646e-20	0.154565	0.293	0.176	1.47832e-15	1	ctsh
ran1	9.33818e-20	0.330828	0.966	0.734	1.53277e-15	4	ran
csrnp1b	9.55828e-20	0.160306	0.251	0.143	1.5689e-15	1	csrnp1b
cox7a2a	1.00196e-19	0.117101	0.355	0.212	1.64462e-15	0	cox7a2a
phax	1.00915e-19	0.144234	0.164	0.035	1.65642e-15	4	phax
hsp90b1	1.01078e-19	0.192673	0.196	0.069	1.65909e-15	3	hsp90b1
cmah1	1.06499e-19	0.265019	0.459	0.197	1.74807e-15	4	cmah
CABZ01068367.1	1.1461e-19	0.192614	0.472	0.355	1.8812e-15	1	CABZ01068367.1
ppp1r9alb	1.15418e-19	0.174606	0.36	0.239	1.89447e-15	1	ppp1r9alb
hnrnpaba	1.17397e-19	0.305146	0.787	0.399	1.92696e-15	4	hnrnpaba
hpf1	1.22598e-19	0.150719	0.155	0.031	2.01233e-15	4	hpf1
cadm4	1.2398e-19	0.126139	0.178	0.061	2.035e-15	3	cadm4
gli2a1	1.32968e-19	0.118755	0.141	0.012	2.18253e-15	5	gli2a
fabp31	1.3427e-19	0.425096	0.62	0.182	2.20391e-15	5	fabp3
mt-co31	1.3451e-19	0.12142	1	1	2.20784e-15	2	mt-co3
hmgn2	1.38878e-19	0.666249	0.656	0.44	2.27954e-15	3	hmgn2
fth1a	1.39565e-19	0.170293	0.841	0.703	2.29081e-15	0	fth1a
mhc2dab1	1.45756e-19	0.184896	0.275	0.121	2.39244e-15	3	mhc2dab
pdap1a	1.60813e-19	0.175607	0.222	0.059	2.63959e-15	4	pdap1a
h2afva	1.66183e-19	0.251004	0.242	0.068	2.72772e-15	4	h2afva
zgc:158463	1.66521e-19	0.450501	0.557	0.38	2.73327e-15	3	zgc:158463
rack11	1.73782e-19	0.124056	1	0.999	2.85245e-15	2	rack1
pacsin21	1.78287e-19	0.21079	0.386	0.141	2.9264e-15	4	pacsin2
atf4a	1.87021e-19	0.148067	0.625	0.438	3.06977e-15	0	atf4a
pprc1	1.90125e-19	0.140801	0.155	0.031	3.1207e-15	4	pprc1
eva1ba	1.95459e-19	0.190621	0.197	0.024	3.20827e-15	5	eva1ba
bckdhb	2.03818e-19	0.111175	0.229	0.12	3.34547e-15	0	bckdhb
mrpl36	2.1902e-19	0.10691	0.361	0.214	3.59499e-15	0	mrpl36
pole3	2.53241e-19	0.175108	0.198	0.05	4.15671e-15	4	pole3
zgc:195173	2.5497e-19	0.125977	0.287	0.167	4.18507e-15	1	zgc:195173
cox6a1	2.58163e-19	0.154622	0.66	0.489	4.23749e-15	0	cox6a1
slc6a11a	2.60742e-19	0.125059	0.145	0.029	4.27981e-15	4	slc6a11a
rarres3l	2.68153e-19	0.144567	0.144	0.062	4.40146e-15	1	rarres3l
ndufa6	2.70428e-19	0.11024	0.414	0.26	4.4388e-15	0	ndufa6
rps8a1	2.75033e-19	0.111959	1	1	4.51439e-15	2	rps8a
naa40.1	3.37506e-19	0.179259	0.208	0.054	5.53982e-15	4	naa40.1
chd4b	3.42972e-19	0.106686	0.328	0.192	5.62954e-15	0	chd4b
gar1	3.64783e-19	0.174932	0.246	0.07	5.98755e-15	4	gar1
pold2	3.79841e-19	0.12209	0.145	0.029	6.23471e-15	4	pold2
myg1	3.83207e-19	0.160052	0.217	0.058	6.28995e-15	4	myg1
mt-nd42	3.931e-19	0.242529	1	0.967	6.45234e-15	4	mt-nd4
abracl	4.00766e-19	0.148309	0.134	0.039	6.57817e-15	3	abracl
polr3h	4.04267e-19	0.169096	0.271	0.082	6.63564e-15	4	polr3h
pa2g4b	4.69514e-19	0.108196	0.266	0.149	7.70661e-15	0	pa2g4b
spcs1	4.85623e-19	0.228957	0.478	0.198	7.97102e-15	4	spcs1
pin1	5.00765e-19	0.224747	0.44	0.174	8.21955e-15	4	pin1
ndufs4	5.14989e-19	0.220146	0.372	0.136	8.45303e-15	4	ndufs4
ccdc80	5.26056e-19	0.208905	0.314	0.203	8.63468e-15	1	ccdc80
sgta	5.39944e-19	0.102352	0.154	0.069	8.86264e-15	0	sgta
slbp	5.482e-19	0.153644	0.092	0.012	8.99816e-15	4	slbp
s100u1	5.56922e-19	0.265198	0.623	0.308	9.14133e-15	4	s100u
srsf7a1	5.57273e-19	0.265024	0.473	0.193	9.14708e-15	4	srsf7a
txndc9	5.66009e-19	0.118244	0.255	0.141	9.29047e-15	0	txndc9
ndufab1a	5.83148e-19	0.27725	0.502	0.217	9.57179e-15	4	ndufab1a
si:dkey-6n6.2	6.06067e-19	0.102298	0.14	0.027	9.94799e-15	4	si:dkey-6n6.2
ecrg4a1	6.291e-19	0.272027	0.3	0.145	1.0326e-14	3	ecrg4a
ndufa10	6.39735e-19	0.170863	0.314	0.103	1.05006e-14	4	ndufa10
ywhaqb	6.49207e-19	0.30007	0.816	0.454	1.06561e-14	4	ywhaqb
ccdc85b	6.75477e-19	0.227192	0.421	0.242	1.10873e-14	3	ccdc85b
atp1a1a.1	6.92973e-19	0.162851	0.851	0.795	1.13745e-14	1	atp1a1a.1
mat1a	7.17114e-19	0.102057	0.311	0.189	1.17707e-14	0	mat1a
ipo7	7.33315e-19	0.108719	0.298	0.173	1.20366e-14	0	ipo7
prkab1b	7.48812e-19	0.109936	0.484	0.314	1.2291e-14	0	prkab1b
si:dkey-56m19.51	7.89571e-19	0.181358	0.222	0.089	1.296e-14	3	si:dkey-56m19.5
CU929418.1	8.01961e-19	0.106525	0.32	0.198	1.31634e-14	0	CU929418.1
gbp	8.07703e-19	0.102418	0.148	0.066	1.32576e-14	0	gbp
podxl	8.99651e-19	0.423057	0.304	0.153	1.47669e-14	3	podxl
ptges3a	9.30179e-19	0.227208	0.42	0.174	1.5268e-14	4	ptges3a
dlst	9.33745e-19	0.102284	0.306	0.178	1.53265e-14	0	dlst
selenbp1	9.57109e-19	0.122286	0.122	0.049	1.571e-14	1	selenbp1
cnbpa	1.01391e-18	0.116517	0.639	0.442	1.66424e-14	0	cnbpa
hypk	1.05994e-18	0.115915	0.348	0.214	1.73979e-14	0	hypk
ndufs5	1.07183e-18	0.211683	0.473	0.192	1.7593e-14	4	ndufs5
chek1	1.09391e-18	0.106768	0.126	0.023	1.79554e-14	4	chek1
selenof	1.11056e-18	0.268733	0.525	0.474	1.82288e-14	1	selenof
naca1	1.11126e-18	0.122476	1	0.998	1.82402e-14	2	naca
ndufc2	1.1361e-18	0.212958	0.614	0.274	1.8648e-14	4	ndufc2
rpf2	1.23992e-18	0.214617	0.333	0.117	2.03521e-14	4	rpf2
gas1b	1.24907e-18	0.102218	0.307	0.186	2.05022e-14	0	gas1b
cox4i1	1.27424e-18	0.189189	0.86	0.873	2.09154e-14	2	cox4i1
ywhag1	1.27684e-18	0.249217	0.366	0.077	2.0958e-14	5	ywhag1
mt-nd31	1.38731e-18	0.329131	0.802	0.466	2.27713e-14	4	mt-nd3
mapk12a1	1.41104e-18	0.214073	0.343	0.127	2.31607e-14	4	mapk12a
naa38	1.4528e-18	0.10728	0.269	0.15	2.38463e-14	0	naa38
adkb	1.51254e-18	0.186511	0.275	0.086	2.48268e-14	4	adkb
lsm4	1.51457e-18	0.217908	0.512	0.218	2.48601e-14	4	lsm4
bzw1b1	1.58058e-18	0.317977	0.739	0.368	2.59436e-14	4	bzw1b
cox14	1.60176e-18	0.162057	0.222	0.061	2.62913e-14	4	cox14
tomm40	1.61253e-18	0.180831	0.217	0.059	2.64681e-14	4	tomm40
slc25a28	1.81747e-18	0.170685	0.251	0.075	2.9832e-14	4	slc25a28
insig1	2.00712e-18	0.207563	0.219	0.122	3.29449e-14	1	insig1
slit2	2.04788e-18	0.219421	0.577	0.486	3.36139e-14	1	slit2
lgals17	2.08412e-18	0.175688	0.26	0.115	3.42087e-14	3	lgals17
plekhg41	2.12074e-18	0.326086	0.565	0.481	3.48099e-14	2	plekhg4
eif3ja	2.15795e-18	0.183222	0.338	0.118	3.54206e-14	4	eif3ja
vps29	2.16894e-18	0.111029	0.294	0.173	3.56009e-14	0	vps29
cbx7a	2.24767e-18	0.183885	0.22	0.086	3.68932e-14	3	cbx7a
atp5mea	2.42485e-18	0.101474	0.48	0.309	3.98016e-14	0	atp5mea
ugt1b51	2.58599e-18	0.222634	0.268	0.044	4.24465e-14	5	ugt1b5
tob1b	2.58752e-18	0.287983	0.585	0.539	4.24715e-14	1	tob1b
dock9b	2.63474e-18	0.171224	0.442	0.32	4.32467e-14	1	dock9b
lhfpl6	2.66503e-18	0.100517	0.21	0.113	4.37438e-14	0	lhfpl6
pbdc11	2.68111e-18	0.216604	0.531	0.228	4.40078e-14	4	pbdc1
map3k14a	2.73208e-18	0.123926	0.183	0.067	4.48444e-14	3	map3k14a
etfb	2.74595e-18	0.114256	0.24	0.133	4.5072e-14	0	etfb
rpl18a1	2.76483e-18	0.114652	1	1	4.5382e-14	2	rpl18a
calm2a	3.05974e-18	0.243747	0.315	0.153	5.02225e-14	3	calm2a
plpp2b	3.22964e-18	0.123245	0.189	0.071	5.30113e-14	3	plpp2b
psmb3	3.29627e-18	0.224548	0.435	0.173	5.4105e-14	4	psmb3
soga1	3.64057e-18	0.109714	0.121	0.034	5.97563e-14	3	soga1
zgc:1584231	3.69091e-18	0.34393	0.377	0.154	6.05826e-14	4	zgc:158423
mt-nd1	3.81308e-18	0.194739	0.936	0.908	6.25878e-14	2	mt-nd1
snrpf	4.13039e-18	0.108559	0.376	0.237	6.77961e-14	0	snrpf
ly75	4.19026e-18	0.140873	0.167	0.059	6.8779e-14	3	ly75
rwdd1	4.41821e-18	0.106543	0.253	0.141	7.25205e-14	0	rwdd1
iqgap1	4.63964e-18	0.145687	0.238	0.101	7.61551e-14	3	iqgap1
smarce1	4.67226e-18	0.102658	0.243	0.134	7.66904e-14	0	smarce1
sorl1	4.74203e-18	0.150027	0.249	0.11	7.78356e-14	3	sorl1
gpd1c	4.7751e-18	0.112915	0.159	0.054	7.83784e-14	3	gpd1c
trim105	5.15685e-18	0.144988	0.218	0.09	8.46445e-14	3	trim105
zgc:158343	5.27964e-18	0.324564	0.302	0.146	8.66601e-14	3	zgc:158343
ddx51	5.53897e-18	0.255718	0.623	0.289	9.09167e-14	4	ddx5
nme2b.11	5.73548e-18	0.116823	1	0.998	9.41422e-14	2	nme2b.1
bsg	5.78405e-18	0.293054	0.57	0.364	9.49393e-14	3	bsg
zgc:86598	5.79015e-18	0.104815	0.236	0.129	9.50395e-14	0	zgc:86598
rps29	6.17779e-18	0.131051	1	0.999	1.01402e-13	2	rps29
cct6a1	6.23374e-18	0.250928	0.763	0.395	1.02321e-13	4	cct6a
scpep1	6.28993e-18	0.163707	0.216	0.085	1.03243e-13	3	scpep1
ebna1bp2	6.38064e-18	0.172301	0.309	0.104	1.04732e-13	4	ebna1bp2
sptan1	7.06129e-18	0.189251	0.249	0.108	1.15904e-13	3	sptan1
pin4	7.1587e-18	0.166456	0.217	0.061	1.17503e-13	4	pin4
ppp1cb	7.24096e-18	0.279272	0.432	0.362	1.18853e-13	1	ppp1cb
cbx3a	7.50856e-18	0.270747	0.754	0.384	1.23246e-13	4	cbx3a
nhp2	7.59215e-18	0.244789	0.372	0.144	1.24618e-13	4	nhp2
nme3	7.68393e-18	0.170597	0.227	0.094	1.26124e-13	3	nme3
ap2m1a	8.07422e-18	0.250713	0.599	0.287	1.3253e-13	4	ap2m1a
mrpl4	8.51497e-18	0.161609	0.208	0.057	1.39765e-13	4	mrpl4
emilin2b	9.06993e-18	0.11619	0.179	0.089	1.48874e-13	1	emilin2b
rps3a1	9.08894e-18	0.108982	1	1	1.49186e-13	2	rps3a
mrpl321	9.35584e-18	0.192725	0.338	0.121	1.53567e-13	4	mrpl32
gpx4a1	9.52674e-18	0.158996	0.258	0.111	1.56372e-13	3	gpx4a
xrcc4	9.6432e-18	0.121949	0.159	0.036	1.58284e-13	4	xrcc4
ndufs2	1.0499e-17	0.241	0.425	0.175	1.7233e-13	4	ndufs2
rbm4.31	1.06325e-17	0.249128	0.585	0.265	1.74522e-13	4	rbm4.3
sdc4	1.0737e-17	0.344832	0.622	0.559	1.76237e-13	1	sdc4
chchd2	1.11916e-17	0.151228	0.242	0.071	1.83699e-13	4	chchd2
hnrnpa0l.11	1.19092e-17	0.366007	0.894	0.579	1.95478e-13	4	hnrnpa0l.1
gstt1b1	1.2165e-17	0.244113	0.788	0.746	1.99676e-13	2	gstt1b
uqcrfs1	1.25338e-17	0.246769	0.729	0.364	2.0573e-13	4	uqcrfs1
ss18l2	1.25457e-17	0.101381	0.115	0.031	2.05925e-13	3	ss18l2
fbxl7	1.29134e-17	0.152992	0.236	0.103	2.11961e-13	3	fbxl7
zgc:110158	1.31763e-17	0.126176	0.242	0.14	2.16276e-13	1	zgc:110158
mt-nd5	1.32714e-17	0.12238	0.623	0.448	2.17836e-13	0	mt-nd5
etf1b	1.36431e-17	0.121581	0.461	0.305	2.23937e-13	0	etf1b
ctnnb2	1.37357e-17	0.201223	0.289	0.135	2.25457e-13	3	ctnnb2
psmg3	1.42247e-17	0.109179	0.25	0.142	2.33484e-13	0	psmg3
timm23a	1.43471e-17	0.178763	0.329	0.115	2.35494e-13	4	timm23a
rps111	1.44532e-17	0.10507	1	1	2.37235e-13	2	rps11
polr2f	1.467e-17	0.167846	0.3	0.101	2.40794e-13	4	polr2f
sf3a2	1.53518e-17	0.177393	0.343	0.123	2.51984e-13	4	sf3a2
ndufs3	1.54543e-17	0.194038	0.391	0.151	2.53667e-13	4	ndufs3
si:ch73-233k15.2	1.5837e-17	0.137428	0.205	0.082	2.59948e-13	3	si:ch73-233k15.2
smarca5	1.61973e-17	0.119105	0.111	0.019	2.65862e-13	4	smarca5
CR383676.12	1.62295e-17	0.377046	1	1	2.66392e-13	5	CR383676.1
rhoab1	1.63607e-17	0.256721	0.372	0.197	2.68545e-13	3	rhoab
basp11	1.67792e-17	0.247668	0.768	0.414	2.75415e-13	4	basp1
sars	1.82699e-17	0.17736	0.246	0.075	2.99883e-13	4	sars
grna1	1.86716e-17	0.180354	0.319	0.161	3.06476e-13	3	grna
cldn7a	1.93955e-17	0.42707	0.642	0.581	3.18358e-13	2	cldn7a
ip6k2a	1.94423e-17	0.198818	0.37	0.203	3.19126e-13	3	ip6k2a
nip7	1.97064e-17	0.159407	0.213	0.059	3.23461e-13	4	nip7
mrpl361	1.97138e-17	0.254253	0.551	0.254	3.23582e-13	4	mrpl36
eif5	2.16565e-17	0.134257	0.423	0.274	3.5547e-13	0	eif5
glrx3	2.1751e-17	0.179197	0.275	0.09	3.5702e-13	4	glrx3
rpl291	2.1809e-17	0.189822	0.928	0.925	3.57972e-13	2	rpl29
eef2b1	2.2358e-17	0.237748	0.99	0.956	3.66984e-13	4	eef2b
lin37	2.37034e-17	0.149639	0.232	0.07	3.89068e-13	4	lin37
bag3	2.41027e-17	0.190348	0.202	0.11	3.95621e-13	1	bag3
pnp5a1	2.41393e-17	0.355891	0.884	0.606	3.96223e-13	4	pnp5a
ddost	2.4419e-17	0.18079	0.256	0.08	4.00814e-13	4	ddost
fez1	2.4623e-17	0.166321	0.174	0.065	4.04163e-13	3	fez1
znf593	2.51042e-17	0.147623	0.193	0.051	4.12061e-13	4	znf593
dusp1	2.54084e-17	0.419004	0.373	0.292	4.17054e-13	1	dusp1
dsc2l	2.60408e-17	0.18143	0.392	0.277	4.27433e-13	1	dsc2l
oaz1b1	2.60554e-17	0.165853	0.943	0.92	4.27673e-13	2	oaz1b
pkig	2.62424e-17	0.118073	0.167	0.058	4.30743e-13	3	pkig
pbx1a	2.68599e-17	0.137744	0.218	0.091	4.40878e-13	3	pbx1a
tnfrsf191	2.68756e-17	0.1423	0.286	0.134	4.41136e-13	3	tnfrsf19
si:ch211-156j16.1	2.68955e-17	0.245903	0.691	0.341	4.41463e-13	4	si:ch211-156j16.1
psma6a	2.75025e-17	0.159374	0.198	0.053	4.51426e-13	4	psma6a
klf11a	2.97067e-17	0.127984	0.298	0.187	4.87607e-13	0	klf11a
MPRIP	3.09183e-17	0.150892	0.269	0.167	5.07492e-13	0	MPRIP
arhgef18a1	3.12698e-17	0.238059	0.405	0.238	5.13263e-13	3	arhgef18a
si:rp71-45k5.4	3.24194e-17	0.169531	0.333	0.119	5.32131e-13	4	si:rp71-45k5.4
vat12	3.47347e-17	0.663294	0.648	0.221	5.70135e-13	5	vat1
[truncated: 2,006 more rows]

## Sheet: Stage IB (SC 0)
	p_val	avg_logFC	pct.1	pct.2	p_val_adj	cluster	gene
gmds	0	1.13983	0.749	0.157	0	0	gmds
timp2a	3.68304e-292	0.786363	0.931	0.442	6.04534e-288	0	timp2a
cx34.5	9.94053e-276	0.929962	0.695	0.163	1.63164e-271	0	cx34.5
pdia2	3.82576e-255	0.88767	0.539	0.073	6.2796e-251	0	pdia2
folr	1.22631e-234	0.761345	0.55	0.096	2.01287e-230	0	folr
angptl4	2.54016e-225	0.926441	0.892	0.558	4.16942e-221	0	angptl4
cmasa	9.0962e-220	0.674717	0.734	0.237	1.49305e-215	0	cmasa
myclb	3.37753e-217	0.794818	0.844	0.431	5.54388e-213	0	myclb
rplp0	6.05395e-209	0.35619	1	0.997	9.93695e-205	0	rplp0
dusp5	8.98401e-196	0.721423	0.492	0.091	1.47464e-191	0	dusp5
rps2	6.58025e-189	0.323938	1	0.998	1.08008e-184	0	rps2
rpl10a	2.41942e-186	0.27889	1	1	3.97124e-182	0	rpl10a
her6	5.40751e-186	0.840642	0.899	0.609	8.87589e-182	0	her6
hpgd	9.85928e-177	0.612117	0.655	0.222	1.6183e-172	0	hpgd
slc25a5	5.52731e-176	0.307047	1	1	9.07253e-172	0	slc25a5
hsp90ab1	1.0395e-175	0.343008	1	0.999	1.70623e-171	0	hsp90ab1
rdh8a	1.32073e-173	0.445582	0.556	0.152	2.16785e-169	0	rdh8a
rpsa	3.16601e-172	0.299032	0.999	0.997	5.19669e-168	0	rpsa
rpl19	3.32129e-171	0.24484	1	1	5.45156e-167	0	rpl19
mt-co3	4.37242e-171	0.30553	1	1	7.17689e-167	0	mt-co3
rps5	9.0741e-171	0.254323	1	1	1.48942e-166	0	rps5
uck2a	1.52828e-167	0.512688	0.945	0.623	2.50852e-163	0	uck2a
nupr1b	3.63257e-165	1.0276	0.825	0.569	5.9625e-161	0	nupr1b
serpine1	4.30837e-165	0.902938	0.548	0.159	7.07176e-161	0	serpine1
rpl17	3.00042e-163	0.248	1	1	4.92488e-159	0	rpl17
rps3a	9.63691e-162	0.245428	1	1	1.5818e-157	0	rps3a
rpl9.1	1.89256e-159	0.269519	1	1	3.10644e-155	0	rpl9.1
rps12	6.27947e-159	0.259307	1	1	1.03071e-154	0	rps12
gne	7.21777e-159	0.603208	0.442	0.097	1.18472e-154	0	gne
mibp2	1.12512e-153	0.56381	0.865	0.524	1.84677e-149	0	mibp2
rpl10	7.15926e-153	0.234096	1	1	1.17512e-148	0	rpl10
eef1b2	1.50881e-152	0.391752	0.987	0.942	2.47657e-148	0	eef1b2
frmd6	3.25438e-152	0.471799	0.615	0.223	5.34174e-148	0	frmd6
cct3	4.55755e-152	0.628868	0.741	0.361	7.48077e-148	0	cct3
rps7	9.08109e-146	0.223548	1	1	1.49057e-141	0	rps7
rps8a	5.99623e-144	0.234339	1	1	9.84221e-140	0	rps8a
rpl22l1	2.8706e-143	0.532552	0.892	0.562	4.7118e-139	0	rpl22l1
rps11	4.17841e-142	0.226391	1	1	6.85844e-138	0	rps11
trib3	3.45719e-141	0.58526	0.482	0.133	5.67463e-137	0	trib3
prkag2a	1.71731e-140	0.439348	0.363	0.063	2.81879e-136	0	prkag2a
rpl32	5.81395e-139	0.241526	1	1	9.54302e-135	0	rpl32
si:dkey-225k4.1	6.89692e-137	0.473087	0.695	0.299	1.13206e-132	0	si:dkey-225k4.1
rpl15	8.80521e-136	0.269658	1	0.997	1.44529e-131	0	rpl15
eef1g	2.67558e-135	0.28159	0.999	0.996	4.3917e-131	0	eef1g
sulf2b	1.31913e-134	0.579997	0.765	0.406	2.16522e-130	0	sulf2b
rpl11	3.25429e-134	0.217674	1	1	5.34159e-130	0	rpl11
rpl13	4.90144e-134	0.204431	1	1	8.04522e-130	0	rpl13
rplp2l	9.22137e-134	0.261883	1	0.999	1.5136e-129	0	rplp2l
btf3	1.03778e-131	0.363927	0.982	0.909	1.70342e-127	0	btf3
zgc:158423	8.6147e-131	0.363523	0.346	0.06	1.41402e-126	0	zgc:158423
si:dkey-151g10.6	1.51477e-129	0.252151	1	1	2.48634e-125	0	si:dkey-151g10.6
tspan18a	1.69337e-129	0.399833	0.512	0.168	2.7795e-125	0	tspan18a
rpl5a	5.59462e-128	0.357204	0.982	0.883	9.18301e-124	0	rpl5a
rps23	1.61889e-126	0.23108	1	0.999	2.65724e-122	0	rps23
rpl23	3.80859e-126	0.232853	1	0.999	6.25142e-122	0	rpl23
rps10	8.90992e-125	0.186463	1	1	1.46247e-120	0	rps10
rpl13a	1.15917e-124	0.19689	1	1	1.90265e-120	0	rpl13a
rpl18a	2.04747e-124	0.227855	1	1	3.36072e-120	0	rpl18a
rpl23a	5.2518e-122	0.246797	1	0.997	8.62031e-118	0	rpl23a
rpl7	7.53903e-122	0.211443	1	1	1.23746e-117	0	rpl7
glula	5.88059e-121	0.493753	0.532	0.187	9.65241e-117	0	glula
rpl7a	1.83938e-120	0.216783	1	0.999	3.01915e-116	0	rpl7a
nxnl2	2.59051e-120	0.304436	0.373	0.085	4.25207e-116	0	nxnl2
rplp1	2.27028e-119	0.214435	1	1	3.72643e-115	0	rplp1
si:ch73-193i22.1	6.52161e-119	0.355514	0.513	0.18	1.07046e-114	0	si:ch73-193i22.1
rps17	2.17549e-118	0.403013	0.946	0.807	3.57084e-114	0	rps17
rps9	5.96806e-118	0.217762	1	1	9.79597e-114	0	rps9
naca	6.00371e-117	0.243681	1	0.997	9.85448e-113	0	naca
nansa	5.346e-116	0.514564	0.341	0.072	8.77493e-112	0	nansa
rpl8	1.74188e-115	0.20417	1	1	2.85912e-111	0	rpl8
sat1a.1	4.28967e-115	0.353244	0.381	0.096	7.04107e-111	0	sat1a.1
rpl18	8.47031e-115	0.220711	1	1	1.39032e-110	0	rpl18
rps6	3.7294e-114	0.265393	0.998	0.985	6.12144e-110	0	rps6
rps3	6.9691e-113	0.234242	1	0.997	1.14391e-108	0	rps3
rps27a	7.73876e-112	0.182333	1	1	1.27024e-107	0	rps27a
rsl24d1	3.58571e-111	0.391292	0.937	0.732	5.88558e-107	0	rsl24d1
nop53	6.82797e-111	0.425166	0.7	0.348	1.12074e-106	0	nop53
rpl3	3.18261e-110	0.273736	0.997	0.987	5.22393e-106	0	rpl3
mafba	5.48216e-109	0.531264	0.582	0.246	8.99842e-105	0	mafba
rsl1d1	2.29246e-108	0.420455	0.594	0.258	3.76284e-104	0	rsl1d1
rps27.1	6.255e-108	0.226654	1	0.999	1.0267e-103	0	rps27.1
atp5mc3b	8.63089e-108	0.298316	0.997	0.972	1.41667e-103	0	atp5mc3b
eef2b	9.49384e-108	0.309264	0.991	0.938	1.55832e-103	0	eef2b
rpl21	9.85229e-108	0.193733	1	1	1.61715e-103	0	rpl21
rps19	2.63619e-107	0.206168	1	1	4.32703e-103	0	rps19
eef1a1l2	5.53998e-106	0.166878	1	1	9.09333e-102	0	eef1a1l2
rpl30	1.03492e-105	0.243578	0.999	0.994	1.69872e-101	0	rpl30
rack1	1.64631e-105	0.218718	1	0.999	2.70225e-101	0	rack1
rps16	2.34928e-105	0.193902	1	1	3.85611e-101	0	rps16
rps14	3.85691e-105	0.180957	1	1	6.33074e-101	0	rps14
klhl41b	7.55765e-105	0.284481	0.393	0.112	1.24051e-100	0	klhl41b
rps4x	2.02381e-104	0.22778	1	0.996	3.32188e-100	0	rps4x
foxp4	2.90579e-104	0.410323	0.814	0.495	4.76957e-100	0	foxp4
nsa2	5.69267e-103	0.404005	0.884	0.622	9.34394e-99	0	nsa2
rps18	9.79261e-103	0.270873	0.996	0.975	1.60736e-98	0	rps18
faua	2.97741e-102	0.211721	1	0.999	4.88712e-98	0	faua
mt-co2	5.00085e-102	0.169438	1	1	8.2084e-98	0	mt-co2
aldob	2.51191e-99	0.484866	0.712	0.385	4.12305e-95	0	aldob
foxo1a	1.9935e-98	0.408796	0.659	0.314	3.27213e-94	0	foxo1a
cox6b2	6.6574e-97	0.361301	0.941	0.785	1.09275e-92	0	cox6b2
uba52	1.16685e-96	0.188945	1	1	1.91527e-92	0	uba52
ddc	3.73383e-95	0.31851	0.225	0.029	6.1287e-91	0	ddc
cmah	1.12285e-94	0.289681	0.376	0.113	1.84305e-90	0	cmah
rps24	7.79802e-94	0.183153	1	1	1.27997e-89	0	rps24
hey1	3.65374e-93	0.395105	0.416	0.146	5.99725e-89	0	hey1
rpl27	9.71314e-93	0.203722	1	0.999	1.59431e-88	0	rpl27
ptbp3	9.50249e-92	0.324502	0.66	0.341	1.55974e-87	0	ptbp3
col28a2b	1.10721e-91	0.302964	0.411	0.139	1.81738e-87	0	col28a2b
rpl24	1.86904e-90	0.183864	1	1	3.06784e-86	0	rpl24
acp6	9.37464e-90	0.257806	0.402	0.135	1.53875e-85	0	acp6
ddx21	1.08223e-89	0.378425	0.701	0.381	1.77638e-85	0	ddx21
rpl4	1.18241e-89	0.375869	0.885	0.687	1.94081e-85	0	rpl4
rpl5b	1.92623e-88	0.288302	0.963	0.884	3.16172e-84	0	rpl5b
itga6a	1.8289e-87	0.221572	0.279	0.062	3.00195e-83	0	itga6a
gtpbp4	2.70374e-85	0.365011	0.759	0.466	4.43792e-81	0	gtpbp4
hsd3b1	1.50487e-84	0.262525	0.288	0.07	2.47009e-80	0	hsd3b1
fbln5	3.32166e-83	0.34923	0.706	0.361	5.45218e-79	0	fbln5
sat1a.2	1.53193e-82	0.405492	0.812	0.514	2.51451e-78	0	sat1a.2
rpl39	1.59313e-82	0.207385	1	1	2.61496e-78	0	rpl39
rps13	3.5729e-82	0.162186	1	1	5.86455e-78	0	rps13
slc38a5b	5.32956e-82	0.339849	0.841	0.554	8.74794e-78	0	slc38a5b
rps26l	8.9804e-82	0.198299	1	0.999	1.47404e-77	0	rps26l
slc1a3a	9.23698e-82	0.25023	0.466	0.189	1.51616e-77	0	slc1a3a
cirbpb	1.10766e-81	0.448367	0.911	0.733	1.81811e-77	0	cirbpb
p4ha1b	6.98834e-81	0.358037	0.48	0.19	1.14707e-76	0	p4ha1b
rps15a	8.52492e-81	0.173258	1	1	1.39928e-76	0	rps15a
hprt1	8.65797e-81	0.344877	0.722	0.391	1.42112e-76	0	hprt1
serbp1a	1.39505e-80	0.255982	0.987	0.934	2.28983e-76	0	serbp1a
rpl37.1	4.27036e-80	0.219965	1	1	7.00936e-76	0	rpl37.1
rpl34	6.06144e-80	0.245999	0.996	0.98	9.94924e-76	0	rpl34
eif3ha	1.15115e-79	0.328727	0.662	0.351	1.8895e-75	0	eif3ha
slc7a11	5.75506e-79	0.286275	0.652	0.339	9.44636e-75	0	slc7a11
zgc:112332	6.28163e-79	0.189996	0.175	0.019	1.03107e-74	0	zgc:112332
ccdc187	1.445e-78	0.336228	0.815	0.524	2.37182e-74	0	ccdc187
sema7a	4.20803e-78	0.216926	0.301	0.083	6.90706e-74	0	sema7a
sec61g	8.20961e-78	0.368451	0.879	0.656	1.34753e-73	0	sec61g
atp1a3a	8.7281e-78	0.196638	0.217	0.038	1.43263e-73	0	atp1a3a
GPR139	3.62072e-77	0.198092	0.22	0.039	5.94306e-73	0	GPR139
xirp2a	4.82198e-77	0.235844	0.288	0.078	7.9148e-73	0	xirp2a
pno1	6.44127e-77	0.329577	0.602	0.299	1.05727e-72	0	pno1
egr2b	2.54651e-76	0.475324	0.358	0.12	4.17984e-72	0	egr2b
adh5	9.59957e-74	0.334491	0.568	0.278	1.57567e-69	0	adh5
sgk494a	2.65338e-73	0.160687	0.178	0.023	4.35525e-69	0	sgk494a
efna1b	5.20882e-73	0.386896	0.479	0.224	8.54976e-69	0	efna1b
tdh	1.13159e-72	0.336343	0.758	0.458	1.8574e-68	0	tdh
fbrsl1	3.15382e-72	0.256836	0.45	0.195	5.17668e-68	0	fbrsl1
gfra3	1.16005e-71	0.20659	0.263	0.067	1.9041e-67	0	gfra3
rpl12	4.53882e-70	0.163847	1	0.999	7.45002e-66	0	rpl12
eif2s1b	4.71449e-70	0.29833	0.632	0.331	7.73837e-66	0	eif2s1b
nme2b.1	8.00339e-70	0.183733	0.999	0.998	1.31368e-65	0	nme2b.1
chpt1	9.25128e-70	0.211115	0.32	0.105	1.51851e-65	0	chpt1
dag1	1.20794e-69	0.269837	0.969	0.863	1.98272e-65	0	dag1
slc31a2	1.68555e-69	0.236688	0.373	0.141	2.76667e-65	0	slc31a2
cct2.1	2.01677e-69	0.31364	0.593	0.305	3.31033e-65	0	cct2.1
eif3g	2.19677e-69	0.311839	0.803	0.539	3.60578e-65	0	eif3g
polr2b	6.61654e-69	0.343325	0.3	0.098	1.08604e-64	0	polr2b
cct4	8.14769e-68	0.311998	0.665	0.372	1.33736e-63	0	cct4
txnipa	1.16778e-67	0.438637	0.48	0.223	1.91679e-63	0	txnipa
eif3s6ip	3.70696e-67	0.290455	0.405	0.166	6.08461e-63	0	eif3s6ip
CR753876.1	6.75899e-67	0.38572	0.25	0.067	1.10942e-62	0	CR753876.1
rpl14	1.09345e-66	0.175882	1	0.998	1.79478e-62	0	rpl14
mkxa	4.28602e-66	0.149674	0.156	0.019	7.03507e-62	0	mkxa
cx43	8.83826e-66	0.341427	0.73	0.446	1.45071e-61	0	cx43
tirap	3.23132e-64	0.166532	0.21	0.046	5.3039e-60	0	tirap
vbp1	1.90767e-63	0.261508	0.346	0.127	3.13125e-59	0	vbp1
rpl28	7.41555e-63	0.141927	1	1	1.21719e-58	0	rpl28
fhl3a	1.5452e-62	0.204914	0.33	0.122	2.53629e-58	0	fhl3a
rpl6	2.23567e-62	0.314795	0.866	0.68	3.66964e-58	0	rpl6
apoa1a	3.54301e-62	0.202193	0.173	0.029	5.81549e-58	0	apoa1a
her15.1	1.94102e-61	0.835416	0.329	0.125	3.18599e-57	0	her15.1
adamtsl2	2.793e-61	0.150997	0.179	0.033	4.58442e-57	0	adamtsl2
sytl2b	2.93921e-61	0.147655	0.155	0.022	4.82442e-57	0	sytl2b
basp1	7.16486e-61	0.284833	0.596	0.335	1.17604e-56	0	basp1
cnnm2b	7.29645e-61	0.213063	0.394	0.164	1.19764e-56	0	cnnm2b
rpl36	1.14408e-60	0.198221	1	0.995	1.87789e-56	0	rpl36
cox5aa	1.55538e-60	0.318716	0.755	0.472	2.553e-56	0	cox5aa
hspa8	3.20263e-60	0.371568	0.864	0.656	5.2568e-56	0	hspa8
narf	5.4461e-60	0.2148	0.358	0.147	8.93923e-56	0	narf
lypd6	1.00528e-59	0.161138	0.213	0.052	1.65007e-55	0	lypd6
rpl36a	1.49301e-59	0.168212	1	0.999	2.45062e-55	0	rpl36a
rps25	2.4689e-59	0.151647	1	0.999	4.05245e-55	0	rps25
net1	2.80074e-59	0.238827	0.587	0.3	4.59713e-55	0	net1
eif3k	3.19267e-59	0.270646	0.586	0.315	5.24045e-55	0	eif3k
egr1	6.99817e-59	0.315488	0.816	0.579	1.14868e-54	0	egr1
htr1fa	1.22736e-57	0.12542	0.136	0.016	2.01459e-53	0	htr1fa
si:ch73-217n20.1	1.57268e-57	0.238213	0.586	0.321	2.58139e-53	0	si:ch73-217n20.1
npm1a	1.76909e-57	0.332106	0.616	0.348	2.90379e-53	0	npm1a
zgc:158689	2.02391e-57	0.1328	0.135	0.016	3.32204e-53	0	zgc:158689
arrdc3a	2.42513e-57	0.35683	0.767	0.541	3.98061e-53	0	arrdc3a
tfr1a	4.13706e-57	0.191727	0.335	0.131	6.79058e-53	0	tfr1a
sort1a	4.27643e-57	0.222065	0.704	0.428	7.01933e-53	0	sort1a
rpl31	1.6839e-56	0.15922	1	1	2.76395e-52	0	rpl31
has2	1.70579e-55	0.1292	0.128	0.014	2.79988e-51	0	has2
myo1ea	2.27678e-55	0.182756	0.298	0.108	3.73711e-51	0	myo1ea
man2c1	2.67919e-55	0.15855	0.213	0.056	4.39762e-51	0	man2c1
sdk1a	1.16517e-54	0.202237	0.52	0.27	1.91251e-50	0	sdk1a
pabpc1a	1.59617e-54	0.273004	0.897	0.717	2.61995e-50	0	pabpc1a
BX908803.2	1.72077e-54	0.124249	0.149	0.024	2.82447e-50	0	BX908803.2
slc5a6b	2.20885e-53	0.161431	0.214	0.059	3.6256e-49	0	slc5a6b
aamp	6.89268e-53	0.229594	0.381	0.163	1.13136e-48	0	aamp
cct6a	2.00822e-52	0.245727	0.577	0.317	3.2963e-48	0	cct6a
her2	2.16585e-52	0.611626	0.665	0.47	3.55503e-48	0	her2
tomm5	3.10097e-52	0.245986	0.51	0.266	5.08994e-48	0	tomm5
ola1	4.44775e-52	0.255267	0.643	0.376	7.30054e-48	0	ola1
iqsec1b	6.39831e-52	0.156158	0.198	0.052	1.05022e-47	0	iqsec1b
sh2d3cb	6.90352e-52	0.190256	0.337	0.142	1.13314e-47	0	sh2d3cb
ybx1	8.15281e-52	0.195315	0.986	0.961	1.3382e-47	0	ybx1
mgat4b	1.0475e-51	0.174166	0.278	0.101	1.71936e-47	0	mgat4b
hsd17b1	2.26283e-51	0.222478	0.979	0.845	3.71421e-47	0	hsd17b1
jam2a	4.2182e-51	0.210506	0.652	0.36	6.92375e-47	0	jam2a
cd82a	4.65901e-51	0.208609	0.367	0.167	7.6473e-47	0	cd82a
tnika	7.8283e-51	0.24569	0.448	0.218	1.28494e-46	0	tnika
zgc:154093	1.32755e-50	0.12947	0.148	0.027	2.17904e-46	0	zgc:154093
comta	1.5977e-50	0.173234	0.338	0.142	2.62246e-46	0	comta
eif3ea	7.0493e-50	0.250834	0.759	0.509	1.15707e-45	0	eif3ea
si:ch211-212k18.6	1.88121e-49	0.11848	0.141	0.024	3.08781e-45	0	si:ch211-212k18.6
abtb2b	1.95815e-49	0.130211	0.161	0.034	3.2141e-45	0	abtb2b
si:ch211-217k17.7	4.6489e-49	0.231132	0.331	0.138	7.63071e-45	0	si:ch211-217k17.7
cishb	8.17862e-49	0.266756	0.39	0.182	1.34244e-44	0	cishb
eif3s10	8.33427e-49	0.241002	0.48	0.248	1.36799e-44	0	eif3s10
ier2b	5.92987e-48	0.27445	0.877	0.677	9.73329e-44	0	ier2b
cct7	1.24479e-47	0.248081	0.653	0.403	2.0432e-43	0	cct7
rps26	1.55287e-47	0.169455	0.996	0.991	2.54888e-43	0	rps26
rgs18	1.88427e-47	0.145429	0.215	0.066	3.09284e-43	0	rgs18
tcp1	9.34237e-47	0.235884	0.58	0.33	1.53346e-42	0	tcp1
cct5	1.02778e-46	0.241997	0.519	0.282	1.687e-42	0	cct5
eef1da	1.03281e-46	0.279385	0.753	0.512	1.69525e-42	0	eef1da
rps15	1.08444e-46	0.121304	1	1	1.77999e-42	0	rps15
ihhb	1.25823e-46	0.111603	0.135	0.024	2.06525e-42	0	ihhb
kcnj19b	1.29857e-46	0.153277	0.23	0.077	2.13148e-42	0	kcnj19b
colec11	2.5471e-46	0.247958	0.795	0.537	4.1808e-42	0	colec11
tcf12	4.16793e-46	0.253247	0.553	0.315	6.84124e-42	0	tcf12
tomm20b	4.22513e-46	0.218826	0.483	0.253	6.93512e-42	0	tomm20b
RPS17	2.18355e-45	0.134323	1	0.999	3.58408e-41	0	RPS17
vdac2	2.22798e-45	0.260686	0.795	0.591	3.657e-41	0	vdac2
zfand5b	2.29519e-45	0.265321	0.395	0.187	3.76733e-41	0	zfand5b
cpamd8	3.37361e-45	0.110622	0.126	0.021	5.53744e-41	0	cpamd8
kif26aa	6.6515e-44	0.116269	0.139	0.028	1.09178e-39	0	kif26aa
dmrt2b	9.12441e-44	0.132658	0.136	0.027	1.49768e-39	0	dmrt2b
gstt1a	1.13905e-43	0.178902	0.34	0.157	1.86964e-39	0	gstt1a
lrp1aa	1.55979e-43	0.219413	0.366	0.174	2.56025e-39	0	lrp1aa
slc11a2	2.32836e-43	0.203975	0.251	0.094	3.82176e-39	0	slc11a2
wsb1	2.86264e-43	0.215647	0.388	0.19	4.69874e-39	0	wsb1
caprin1b	2.98412e-43	0.206401	0.369	0.175	4.89813e-39	0	caprin1b
gata5	3.00752e-43	0.14848	0.24	0.087	4.93654e-39	0	gata5
pdk2a	3.225e-43	0.182591	0.281	0.117	5.29352e-39	0	pdk2a
oaz1b	4.39423e-43	0.207325	0.969	0.897	7.21269e-39	0	oaz1b
eif3d	5.53252e-43	0.240708	0.709	0.47	9.08107e-39	0	eif3d
impdh1b	7.77663e-43	0.224352	0.625	0.368	1.27646e-38	0	impdh1b
ier2a	1.10361e-42	0.259232	0.849	0.624	1.81147e-38	0	ier2a
rps28	3.99511e-42	0.158186	1	1	6.55758e-38	0	rps28
pfdn5	1.83918e-41	0.202605	0.37	0.177	3.01883e-37	0	pfdn5
rhov	2.9262e-41	0.12963	0.124	0.023	4.80306e-37	0	rhov
aldh6a1	9.42351e-41	0.195245	0.405	0.201	1.54678e-36	0	aldh6a1
btg2	1.03249e-40	0.241537	0.955	0.901	1.69472e-36	0	btg2
ednrab	1.06844e-40	0.172459	0.404	0.21	1.75373e-36	0	ednrab
eif2s3	1.39649e-40	0.224107	0.577	0.348	2.29221e-36	0	eif2s3
si:ch211-225h24.2	1.75592e-40	0.127085	0.188	0.059	2.88217e-36	0	si:ch211-225h24.2
pacsin2	1.90768e-40	0.191602	0.249	0.097	3.13126e-36	0	pacsin2
zgc:162730	2.0135e-40	0.397491	0.65	0.45	3.30496e-36	0	zgc:162730
limch1b	2.20026e-40	0.173813	0.47	0.265	3.61151e-36	0	limch1b
leo1	2.68337e-40	0.196173	0.315	0.14	4.40449e-36	0	leo1
vdac3	3.12077e-40	0.201281	0.43	0.225	5.12243e-36	0	vdac3
ak2	3.49743e-40	0.212702	0.371	0.183	5.74068e-36	0	ak2
wu:fc75a09	6.11833e-40	0.207023	0.612	0.389	1.00426e-35	0	wu:fc75a09
eif3i	7.63911e-40	0.205296	0.385	0.196	1.25388e-35	0	eif3i
vegfab	9.30422e-40	0.148348	0.275	0.116	1.5272e-35	0	vegfab
eif3m	1.01139e-39	0.250804	0.791	0.561	1.6601e-35	0	eif3m
anxa4	1.21966e-39	0.206559	0.483	0.265	2.00195e-35	0	anxa4
rpl35a	1.4921e-39	0.137929	1	1	2.44913e-35	0	rpl35a
si:dkey-42i9.16	1.86684e-39	0.118912	0.164	0.046	3.06423e-35	0	si:dkey-42i9.16
COX5B	1.88711e-39	0.255149	0.79	0.57	3.0975e-35	0	COX5B
vasna	2.24002e-39	0.158373	0.275	0.118	3.67676e-35	0	vasna
homer1b	2.54541e-39	0.121548	0.166	0.048	4.17804e-35	0	homer1b
si:dkeyp-115e12.6	2.8386e-39	0.155731	0.151	0.039	4.65928e-35	0	si:dkeyp-115e12.6
mapk12a	3.2084e-39	0.146658	0.226	0.085	5.26626e-35	0	mapk12a
rnf144b	3.90962e-39	0.152611	0.255	0.105	6.41725e-35	0	rnf144b
myo1d	5.87719e-39	0.165459	0.378	0.195	9.64682e-35	0	myo1d
inhbaa	6.34591e-39	0.236978	0.742	0.514	1.04162e-34	0	inhbaa
spon1b	2.36874e-38	0.142763	0.258	0.107	3.88805e-34	0	spon1b
rplp2	6.31248e-38	0.185315	0.977	0.914	1.03613e-33	0	rplp2
rgl1	6.70876e-38	0.190588	0.387	0.208	1.10118e-33	0	rgl1
egfra	7.58721e-38	0.201717	0.451	0.26	1.24536e-33	0	egfra
dpysl5a	9.26335e-38	0.109709	0.157	0.044	1.52049e-33	0	dpysl5a
slco2b1	1.43139e-37	0.107505	0.131	0.03	2.34948e-33	0	slco2b1
atp5l	1.57552e-37	0.252857	0.754	0.541	2.58605e-33	0	atp5l
rnf128a	4.46898e-37	0.167176	0.2	0.07	7.33538e-33	0	rnf128a
syne2b	4.79131e-37	0.144959	0.216	0.082	7.86446e-33	0	syne2b
chrna1	4.85279e-37	0.143526	0.327	0.157	7.96538e-33	0	chrna1
mdh2	7.04478e-37	0.23831	0.743	0.522	1.15633e-32	0	mdh2
si:ch211-214j24.10	7.15884e-37	0.19109	0.377	0.192	1.17505e-32	0	si:ch211-214j24.10
ccdc50	7.31911e-37	0.165161	0.295	0.138	1.20136e-32	0	ccdc50
rpl38	3.28778e-36	0.152018	1	0.997	5.39657e-32	0	rpl38
tsr2	4.30784e-36	0.17396	0.28	0.123	7.07088e-32	0	tsr2
zgc:153738	4.56841e-36	0.137862	0.186	0.064	7.49859e-32	0	zgc:153738
fscn1a	5.45138e-36	0.177321	0.579	0.334	8.9479e-32	0	fscn1a
tpt1	5.77135e-36	0.165776	0.988	0.951	9.47309e-32	0	tpt1
romo1	5.82166e-36	0.229652	0.79	0.584	9.55567e-32	0	romo1
slc9a7	7.39115e-36	0.104155	0.138	0.036	1.21318e-31	0	slc9a7
smad2	8.3383e-36	0.182339	0.602	0.359	1.36865e-31	0	smad2
si:ch211-132g1.3	1.38427e-35	0.134669	0.215	0.083	2.27214e-31	0	si:ch211-132g1.3
rpl35	1.40345e-35	0.126295	0.999	0.998	2.30362e-31	0	rpl35
mylk4b	2.49326e-35	0.100834	0.113	0.023	4.09243e-31	0	mylk4b
prdx6	2.86988e-35	0.193909	0.472	0.267	4.71063e-31	0	prdx6
swap70b	4.32315e-35	0.173406	0.415	0.22	7.09602e-31	0	swap70b
nrxn2b	5.92838e-35	0.163567	0.368	0.194	9.73084e-31	0	nrxn2b
slc12a8	9.92635e-35	0.101933	0.144	0.04	1.62931e-30	0	slc12a8
gfpt1	1.54044e-34	0.104612	0.149	0.043	2.52848e-30	0	gfpt1
igf1rb	1.6958e-34	0.131342	0.219	0.087	2.78349e-30	0	igf1rb
rpl22	2.58553e-34	0.139878	0.996	0.979	4.24389e-30	0	rpl22
rps21	4.54067e-34	0.136479	1	1	7.45306e-30	0	rps21
naa10	6.06103e-34	0.17808	0.303	0.146	9.94858e-30	0	naa10
atp5f1e	6.32042e-34	0.220721	0.715	0.506	1.03743e-29	0	atp5f1e
atp2b1a	1.06302e-33	0.169	0.312	0.149	1.74484e-29	0	atp2b1a
RASSF5	1.31811e-33	0.165894	0.425	0.245	2.16354e-29	0	RASSF5
col18a1a	1.37918e-33	0.14986	0.16	0.051	2.26378e-29	0	col18a1a
eif3f	3.49572e-33	0.207411	0.888	0.723	5.73788e-29	0	eif3f
rgcc	3.86806e-33	0.271404	0.469	0.275	6.34903e-29	0	rgcc
tsc22d3	4.37579e-33	0.221822	0.32	0.161	7.18242e-29	0	tsc22d3
cog6	4.64367e-33	0.12585	0.193	0.072	7.62213e-29	0	cog6
sos1	6.27639e-33	0.157059	0.498	0.305	1.03021e-28	0	sos1
ndufa4l	8.71625e-33	0.180677	0.952	0.877	1.43069e-28	0	ndufa4l
ube2nb	8.71975e-33	0.156616	0.33	0.162	1.43126e-28	0	ube2nb
rbp5	9.10213e-33	0.178762	0.598	0.372	1.49402e-28	0	rbp5
DTX4	1.08274e-32	0.130616	0.245	0.108	1.77721e-28	0	DTX4
her4.1	1.3603e-32	0.213791	0.352	0.188	2.2328e-28	0	her4.1
sash1a	1.79306e-32	0.15641	0.421	0.225	2.94312e-28	0	sash1a
skia	2.02557e-32	0.147908	0.384	0.213	3.32476e-28	0	skia
mdh1aa	2.70268e-32	0.181335	0.462	0.264	4.43618e-28	0	mdh1aa
si:dkey-194e6.1	3.08857e-32	0.164661	0.375	0.205	5.06958e-28	0	si:dkey-194e6.1
erf	3.19922e-32	0.143426	0.29	0.142	5.25121e-28	0	erf
hspb11	4.91535e-32	0.228583	0.166	0.055	8.06806e-28	0	hspb11
slc25a3b	5.30819e-32	0.206644	0.884	0.738	8.71287e-28	0	slc25a3b
lsm12b	5.36975e-32	0.1762	0.445	0.253	8.81391e-28	0	lsm12b
ets2	5.97286e-32	0.147588	0.153	0.049	9.80386e-28	0	ets2
efna1a	8.91986e-32	0.118132	0.184	0.068	1.46411e-27	0	efna1a
phkg1a	1.32905e-31	0.115722	0.166	0.058	2.1815e-27	0	phkg1a
svild	1.68539e-31	0.177243	0.585	0.359	2.7664e-27	0	svild
her4.2.1	3.09485e-31	0.240083	0.306	0.157	5.07989e-27	0	her4.2.1
cpn1.1	3.48226e-31	0.161837	0.211	0.086	5.71578e-27	0	cpn1.1
ldhba	3.88631e-31	0.201037	0.616	0.395	6.37899e-27	0	ldhba
raph1b	5.58398e-31	0.134224	0.258	0.122	9.16555e-27	0	raph1b
psma1	8.4261e-31	0.178103	0.578	0.367	1.38306e-26	0	psma1
junbb	1.06295e-30	0.175802	0.575	0.36	1.74473e-26	0	junbb
ccdc85al	1.34014e-30	0.126458	0.261	0.122	2.19971e-26	0	ccdc85al
antxr1c	1.76252e-30	0.184415	0.721	0.509	2.89299e-26	0	antxr1c
pnp4a	1.85924e-30	0.201771	0.927	0.824	3.05176e-26	0	pnp4a
adarb1a	2.13533e-30	0.119513	0.268	0.127	3.50494e-26	0	adarb1a
phlda2	2.41236e-30	0.194478	0.855	0.762	3.95966e-26	0	phlda2
fam207a	2.50687e-30	0.153413	0.245	0.108	4.11477e-26	0	fam207a
usp5	2.91077e-30	0.147216	0.227	0.098	4.77773e-26	0	usp5
mfge8b	3.6402e-30	0.169576	0.656	0.428	5.97502e-26	0	mfge8b
tsta3	4.1997e-30	0.102893	0.183	0.069	6.89339e-26	0	tsta3
stox2a	5.23985e-30	0.141581	0.467	0.286	8.60069e-26	0	stox2a
btg1	9.25529e-30	0.206067	0.865	0.728	1.51916e-25	0	btg1
plxdc2	1.09934e-29	0.110662	0.166	0.06	1.80445e-25	0	plxdc2
cirbpa	1.39891e-29	0.239973	0.679	0.465	2.29617e-25	0	cirbpa
vdac1	1.7494e-29	0.159392	0.495	0.297	2.87146e-25	0	vdac1
tiparp	3.22489e-29	0.146269	0.358	0.199	5.29334e-25	0	tiparp
st13	6.27159e-29	0.146979	0.255	0.118	1.02942e-24	0	st13
si:ch211-136a13.1	7.11887e-29	0.133559	0.381	0.218	1.16849e-24	0	si:ch211-136a13.1
tsc22d1	9.19652e-29	0.165604	0.393	0.218	1.50952e-24	0	tsc22d1
pdcd4a	1.04254e-28	0.15332	0.285	0.14	1.71122e-24	0	pdcd4a
nedd9	2.28614e-28	0.105051	0.184	0.073	3.75248e-24	0	nedd9
bcat2	2.68829e-28	0.129759	0.212	0.089	4.41256e-24	0	bcat2
acat1	5.00709e-28	0.14299	0.22	0.097	8.21863e-24	0	acat1
mef2aa	5.67564e-28	0.126008	0.61	0.406	9.31599e-24	0	mef2aa
si:ch211-246m6.5	6.28799e-28	0.121532	0.277	0.139	1.03211e-23	0	si:ch211-246m6.5
kidins220a	7.63087e-28	0.160279	0.646	0.451	1.25253e-23	0	kidins220a
RPL37A	1.44119e-27	0.104535	1	1	2.36557e-23	0	RPL37A
serp1	1.87225e-27	0.184849	0.196	0.082	3.07312e-23	0	serp1
pcolce2b	1.92636e-27	0.12904	0.264	0.133	3.16193e-23	0	pcolce2b
dnmbp	2.56375e-27	0.12372	0.27	0.136	4.20814e-23	0	dnmbp
wu:fb59d01	2.6435e-27	0.131085	0.286	0.147	4.33904e-23	0	wu:fb59d01
foxo4	4.4127e-27	0.147281	0.447	0.283	7.243e-23	0	foxo4
bccip	5.19627e-27	0.141589	0.485	0.29	8.52916e-23	0	bccip
CABZ01084501.3	9.12041e-27	0.141601	0.063	0.008	1.49702e-22	0	CABZ01084501.3
rpl29	9.30038e-27	0.162077	0.972	0.898	1.52656e-22	0	rpl29
eya2	1.35789e-26	0.142443	0.507	0.326	2.22885e-22	0	eya2
ADGRL3	1.61576e-26	0.136608	0.546	0.362	2.65212e-22	0	ADGRL3
atf3	1.92331e-26	0.170257	0.547	0.36	3.15692e-22	0	atf3
eif3ba	1.93747e-26	0.139666	0.56	0.349	3.18016e-22	0	eif3ba
atp5po	1.93908e-26	0.165104	0.751	0.548	3.1828e-22	0	atp5po
shroom2a	1.97115e-26	0.127335	0.248	0.124	3.23545e-22	0	shroom2a
mt-atp6	2.71452e-26	0.146612	0.998	0.994	4.45562e-22	0	mt-atp6
prelid3b	2.89685e-26	0.127078	0.47	0.281	4.75489e-22	0	prelid3b
ahcy	3.00067e-26	0.134596	0.221	0.101	4.92531e-22	0	ahcy
ston2	3.00264e-26	0.125348	0.371	0.217	4.92853e-22	0	ston2
si:ch211-269k10.2	3.87998e-26	0.109893	0.214	0.098	6.36861e-22	0	si:ch211-269k10.2
her15.2	3.89275e-26	0.50412	0.201	0.091	6.38956e-22	0	her15.2
cdkn1bb	5.37181e-26	0.150477	0.351	0.196	8.81729e-22	0	cdkn1bb
mt-nd2	5.44709e-26	0.18058	0.958	0.88	8.94085e-22	0	mt-nd2
mpped2	8.34823e-26	0.120133	0.299	0.161	1.37028e-21	0	mpped2
rbbp9	9.66134e-26	0.140888	0.227	0.107	1.58581e-21	0	rbbp9
mt-nd3	9.81475e-26	0.163009	0.609	0.409	1.61099e-21	0	mt-nd3
atp5if1a	1.19087e-25	0.150539	0.447	0.26	1.95469e-21	0	atp5if1a
uqcrb	1.30978e-25	0.138144	0.58	0.375	2.14988e-21	0	uqcrb
pnp5a	1.36321e-25	0.186722	0.746	0.546	2.23757e-21	0	pnp5a
gmpr2	1.63899e-25	0.151907	0.642	0.416	2.69024e-21	0	gmpr2
uqcrc2b	1.92258e-25	0.133625	0.261	0.128	3.15572e-21	0	uqcrc2b
btbd6a	2.03053e-25	0.117843	0.462	0.288	3.33291e-21	0	btbd6a
zgc:162171	2.1087e-25	0.102062	0.187	0.08	3.46121e-21	0	zgc:162171
prps1a	6.56391e-25	0.132933	0.584	0.366	1.0774e-20	0	prps1a
rbpjb	8.61588e-25	0.124646	0.291	0.158	1.41421e-20	0	rbpjb
arg2	8.89923e-25	0.132205	0.188	0.083	1.46072e-20	0	arg2
atf4b	1.64806e-24	0.182608	0.877	0.747	2.70513e-20	0	atf4b
btf3l4	1.72317e-24	0.134486	0.352	0.198	2.82841e-20	0	btf3l4
cox7b	1.74577e-24	0.189958	0.553	0.373	2.8655e-20	0	cox7b
daam1a	2.01209e-24	0.15347	0.47	0.311	3.30265e-20	0	daam1a
csde1	2.94037e-24	0.133348	0.358	0.205	4.82633e-20	0	csde1
eif3c	3.6777e-24	0.142457	0.407	0.244	6.03658e-20	0	eif3c
ctsla	4.24514e-24	0.248289	0.847	0.699	6.96797e-20	0	ctsla
got2b	8.86863e-24	0.140975	0.285	0.152	1.4557e-19	0	got2b
appa	1.06506e-23	0.133031	0.984	0.912	1.74819e-19	0	appa
chchd6b	1.07639e-23	0.130935	0.354	0.201	1.76679e-19	0	chchd6b
dohh	1.2143e-23	0.108055	0.134	0.048	1.99315e-19	0	dohh
ncl	1.28361e-23	0.176264	0.759	0.552	2.10692e-19	0	ncl
sall1a	1.90398e-23	0.121019	0.355	0.213	3.12519e-19	0	sall1a
si:dkey-180p18.9	1.92606e-23	0.141282	0.331	0.187	3.16144e-19	0	si:dkey-180p18.9
ier5	2.09036e-23	0.163062	0.699	0.497	3.43112e-19	0	ier5
s100u	3.2953e-23	0.160121	0.417	0.268	5.40891e-19	0	s100u
akap13	6.16284e-23	0.134102	0.436	0.28	1.01157e-18	0	akap13
rpl26	6.36123e-23	0.147714	0.274	0.149	1.04413e-18	0	rpl26
utp3	6.39497e-23	0.124419	0.205	0.095	1.04967e-18	0	utp3
rbbp6	6.93346e-23	0.129011	0.328	0.185	1.13806e-18	0	rbbp6
hsf2	7.5919e-23	0.129794	0.346	0.195	1.24613e-18	0	hsf2
fmnl2a	8.33245e-23	0.107953	0.205	0.099	1.36769e-18	0	fmnl2a
ptmab	8.43419e-23	0.183468	0.724	0.534	1.38439e-18	0	ptmab
si:zfos-464b6.2	1.07764e-22	0.126673	0.435	0.263	1.76884e-18	0	si:zfos-464b6.2
wipf1b	1.24182e-22	0.127118	0.266	0.14	2.03832e-18	0	wipf1b
si:dkey-79d12.5	1.33304e-22	0.109968	0.189	0.087	2.18805e-18	0	si:dkey-79d12.5
ndufs8a	1.47045e-22	0.124472	0.345	0.197	2.4136e-18	0	ndufs8a
PLEKHH3	1.48454e-22	0.118419	0.449	0.289	2.43672e-18	0	PLEKHH3
chtopb	1.9034e-22	0.104931	0.162	0.069	3.12424e-18	0	chtopb
dldh	1.92971e-22	0.127216	0.339	0.194	3.16742e-18	0	dldh
hnrnpa0l.1	2.05007e-22	0.218985	0.709	0.526	3.36498e-18	0	hnrnpa0l.1
cct8	2.66618e-22	0.119436	0.226	0.112	4.37627e-18	0	cct8
gadd45bb	2.68883e-22	0.380504	0.204	0.1	4.41345e-18	0	gadd45bb
bzw1b	4.48346e-22	0.185795	0.493	0.324	7.35916e-18	0	bzw1b
uqcrh	4.59178e-22	0.129356	0.617	0.416	7.53695e-18	0	uqcrh
pcf11	6.08268e-22	0.128266	0.245	0.127	9.98412e-18	0	pcf11
actb2	6.14645e-22	0.147627	0.999	0.999	1.00888e-17	0	actb2
mrpl42	6.45846e-22	0.10334	0.144	0.057	1.06009e-17	0	mrpl42
prdx2	8.60311e-22	0.182125	0.677	0.49	1.41211e-17	0	prdx2
eno3	1.30682e-21	0.163801	0.231	0.118	2.14502e-17	0	eno3
mcl1b	1.3441e-21	0.194518	0.438	0.284	2.20621e-17	0	mcl1b
atp5f1c	1.64352e-21	0.141054	0.745	0.534	2.69768e-17	0	atp5f1c
CR589944.1	1.73166e-21	0.115438	0.209	0.101	2.84235e-17	0	CR589944.1
her4.2	1.77007e-21	0.137063	0.244	0.129	2.90539e-17	0	her4.2
ppfibp1b	1.94528e-21	0.103152	0.412	0.263	3.19298e-17	0	ppfibp1b
eif5a	1.98753e-21	0.173118	0.655	0.461	3.26233e-17	0	eif5a
celsr1a	3.11059e-21	0.124446	0.39	0.25	5.10573e-17	0	celsr1a
atp5mc1	3.30527e-21	0.139818	0.438	0.267	5.42528e-17	0	atp5mc1
mob2a	3.41126e-21	0.100621	0.218	0.111	5.59924e-17	0	mob2a
lfng	5.74104e-21	0.143995	0.197	0.096	9.42334e-17	0	lfng
si:dkey-16p21.8	5.96073e-21	0.113687	0.161	0.07	9.78393e-17	0	si:dkey-16p21.8
drg2	7.82439e-21	0.108795	0.164	0.072	1.2843e-16	0	drg2
cbsb	7.97606e-21	0.13302	0.223	0.118	1.30919e-16	0	cbsb
nop56	9.75758e-21	0.12616	0.559	0.372	1.60161e-16	0	nop56
dido1	1.08964e-20	0.106354	0.447	0.278	1.78853e-16	0	dido1
pfdn4	1.23258e-20	0.122915	0.212	0.107	2.02316e-16	0	pfdn4
si:dkey-93n13.1	1.2612e-20	0.101682	0.136	0.055	2.07013e-16	0	si:dkey-93n13.1
atp5f1d	1.30718e-20	0.127593	0.674	0.473	2.1456e-16	0	atp5f1d
nucb2b	1.46062e-20	0.105844	0.143	0.06	2.39746e-16	0	nucb2b
tktb	1.5771e-20	0.115072	0.294	0.165	2.58865e-16	0	tktb
suclg1	1.78062e-20	0.109819	0.266	0.143	2.92271e-16	0	suclg1
zfhx3	1.97144e-20	0.156204	0.575	0.418	3.23593e-16	0	zfhx3
uqcrc2a	2.08647e-20	0.114476	0.175	0.08	3.42474e-16	0	uqcrc2a
pbdc1	2.09115e-20	0.11993	0.33	0.192	3.43241e-16	0	pbdc1
cox7a2l	2.11015e-20	0.118994	0.345	0.203	3.4636e-16	0	cox7a2l
pinx1	2.87476e-20	0.109613	0.189	0.09	4.71864e-16	0	pinx1
clk4a	5.16957e-20	0.132045	0.26	0.145	8.48533e-16	0	clk4a
fam32a	5.24233e-20	0.123683	0.338	0.202	8.60476e-16	0	fam32a
zgc:193541	5.64543e-20	0.13645	0.685	0.493	9.26642e-16	0	zgc:193541
eif6	7.9305e-20	0.126705	0.268	0.151	1.30171e-15	0	eif6
cox7a2a	1.00196e-19	0.117101	0.355	0.212	1.64462e-15	0	cox7a2a
fth1a	1.39565e-19	0.170293	0.841	0.703	2.29081e-15	0	fth1a
atf4a	1.87021e-19	0.148067	0.625	0.438	3.06977e-15	0	atf4a
bckdhb	2.03818e-19	0.111175	0.229	0.12	3.34547e-15	0	bckdhb
mrpl36	2.1902e-19	0.10691	0.361	0.214	3.59499e-15	0	mrpl36
cox6a1	2.58163e-19	0.154622	0.66	0.489	4.23749e-15	0	cox6a1
ndufa6	2.70428e-19	0.11024	0.414	0.26	4.4388e-15	0	ndufa6
chd4b	3.42972e-19	0.106686	0.328	0.192	5.62954e-15	0	chd4b
pa2g4b	4.69514e-19	0.108196	0.266	0.149	7.70661e-15	0	pa2g4b
sgta	5.39944e-19	0.102352	0.154	0.069	8.86264e-15	0	sgta
txndc9	5.66009e-19	0.118244	0.255	0.141	9.29047e-15	0	txndc9
mat1a	7.17114e-19	0.102057	0.311	0.189	1.17707e-14	0	mat1a
ipo7	7.33315e-19	0.108719	0.298	0.173	1.20366e-14	0	ipo7
prkab1b	7.48812e-19	0.109936	0.484	0.314	1.2291e-14	0	prkab1b
CU929418.1	8.01961e-19	0.106525	0.32	0.198	1.31634e-14	0	CU929418.1
gbp	8.07703e-19	0.102418	0.148	0.066	1.32576e-14	0	gbp
dlst	9.33745e-19	0.102284	0.306	0.178	1.53265e-14	0	dlst
cnbpa	1.01391e-18	0.116517	0.639	0.442	1.66424e-14	0	cnbpa
hypk	1.05994e-18	0.115915	0.348	0.214	1.73979e-14	0	hypk
gas1b	1.24907e-18	0.102218	0.307	0.186	2.05022e-14	0	gas1b
naa38	1.4528e-18	0.10728	0.269	0.15	2.38463e-14	0	naa38
vps29	2.16894e-18	0.111029	0.294	0.173	3.56009e-14	0	vps29
atp5mea	2.42485e-18	0.101474	0.48	0.309	3.98016e-14	0	atp5mea
lhfpl6	2.66503e-18	0.100517	0.21	0.113	4.37438e-14	0	lhfpl6
etfb	2.74595e-18	0.114256	0.24	0.133	4.5072e-14	0	etfb
snrpf	4.13039e-18	0.108559	0.376	0.237	6.77961e-14	0	snrpf
rwdd1	4.41821e-18	0.106543	0.253	0.141	7.25205e-14	0	rwdd1
smarce1	4.67226e-18	0.102658	0.243	0.134	7.66904e-14	0	smarce1
zgc:86598	5.79015e-18	0.104815	0.236	0.129	9.50395e-14	0	zgc:86598
mt-nd5	1.32714e-17	0.12238	0.623	0.448	2.17836e-13	0	mt-nd5
etf1b	1.36431e-17	0.121581	0.461	0.305	2.23937e-13	0	etf1b
psmg3	1.42247e-17	0.109179	0.25	0.142	2.33484e-13	0	psmg3
eif5	2.16565e-17	0.134257	0.423	0.274	3.5547e-13	0	eif5
klf11a	2.97067e-17	0.127984	0.298	0.187	4.87607e-13	0	klf11a
MPRIP	3.09183e-17	0.150892	0.269	0.167	5.07492e-13	0	MPRIP
rbm4.3	5.53692e-17	0.111021	0.368	0.23	9.08831e-13	0	rbm4.3
sumo2b	5.68882e-17	0.117006	0.375	0.242	9.33763e-13	0	sumo2b
srsf7a	5.87957e-17	0.122288	0.28	0.164	9.65073e-13	0	srsf7a
si:dkey-93n13.2	6.45753e-17	0.111964	0.235	0.135	1.05994e-12	0	si:dkey-93n13.2
gspt1l	9.14172e-17	0.103764	0.228	0.127	1.50052e-12	0	gspt1l
mt-nd4	1.08881e-16	0.118074	0.984	0.959	1.78716e-12	0	mt-nd4
gtf2f2a	1.25375e-16	0.102091	0.23	0.129	2.05791e-12	0	gtf2f2a
clstn1	1.53335e-16	0.121574	0.531	0.394	2.51684e-12	0	clstn1
ndufb4	3.0055e-16	0.103685	0.427	0.281	4.93323e-12	0	ndufb4
gstz1	3.17206e-16	0.110502	0.309	0.199	5.20661e-12	0	gstz1
mrpl32	8.28461e-16	0.10223	0.187	0.099	1.35984e-11	0	mrpl32
rsrp1	8.66211e-16	0.113961	0.598	0.423	1.4218e-11	0	rsrp1
cox7a1	9.15267e-16	0.111658	0.292	0.179	1.50232e-11	0	cox7a1
cox6c	1.00539e-15	0.111286	0.606	0.434	1.65024e-11	0	cox6c
slc27a1a	1.01259e-15	0.114412	0.417	0.291	1.66207e-11	0	slc27a1a
akt1s1	1.25207e-15	0.100284	0.223	0.126	2.05515e-11	0	akt1s1
atp5pb	1.55364e-15	0.142141	0.759	0.601	2.55014e-11	0	atp5pb
cldn7b	2.04107e-15	0.110755	0.166	0.086	3.3502e-11	0	cldn7b
uqcr10	3.29605e-15	0.102828	0.293	0.177	5.41014e-11	0	uqcr10
slc7a3a	4.49245e-15	0.103282	0.689	0.507	7.3739e-11	0	slc7a3a
si:dkey-112e7.2	5.50471e-15	0.113526	0.21	0.12	9.03543e-11	0	si:dkey-112e7.2
h1fx	1.39767e-14	0.224544	0.525	0.4	2.29413e-10	0	h1fx
atp5pd	2.08365e-14	0.102024	0.735	0.558	3.42011e-10	0	atp5pd
srsf5a	3.94807e-14	0.114373	0.82	0.669	6.48037e-10	0	srsf5a
mknk2b	4.43726e-14	0.113858	0.755	0.606	7.28331e-10	0	mknk2b
eif5a2	4.74396e-14	0.10634	0.339	0.22	7.78673e-10	0	eif5a2
atp6v0e1	1.89554e-13	0.102677	0.77	0.601	3.11135e-09	0	atp6v0e1
chac1	4.18513e-13	0.110991	0.654	0.508	6.86948e-09	0	chac1
atp5fa1	2.43055e-12	0.125067	0.887	0.747	3.9895e-08	0	atp5fa1
ecm1b	6.87158e-12	0.103072	0.994	0.93	1.1279e-07	0	ecm1b
ttll12	8.84168e-11	0.110977	0.236	0.157	1.45127e-06	0	ttll12
hist2h2l	1.9916e-10	0.123177	0.375	0.272	3.26901e-06	0	hist2h2l
ppiaa	5.21869e-10	0.122445	0.866	0.747	8.56596e-06	0	ppiaa
rasl11b	5.75565e-10	0.107009	0.109	0.058	9.44732e-06	0	rasl11b
ran	5.2823e-09	0.106395	0.821	0.7	8.67036e-05	0	ran

## Sheet: Stage IB (SC 2)
	p_val	avg_logFC	pct.1	pct.2	p_val_adj	cluster	gene
col12a1a1	1.89281e-14	0.219523	0.228	0.123	3.10685e-10	2	col12a1a
col16a11	1.22628e-06	0.109735	0.243	0.169	0.0201281	2	col16a1
si:ch211-246m6.51	3.14101e-07	0.118324	0.255	0.178	0.00515565	2	si:ch211-246m6.5
CU861453.11	8.58369e-08	0.108055	0.265	0.18	0.00140893	2	CU861453.1
dap1b.1	6.86196e-06	0.103399	0.25	0.183	0.112632	2	dap1b.1
agtr2	4.05775e-06	0.114327	0.291	0.218	0.0666039	2	agtr2
lpar1	8.79794e-05	0.105383	0.283	0.224	1	2	lpar1
cyp2x12.1	4.18502e-06	0.100168	0.307	0.229	0.0686929	2	cyp2x12.1
tp53i11b1	1.51939e-05	0.110253	0.304	0.237	0.249393	2	tp53i11b
zgc:194839	1.60453e-06	0.133834	0.316	0.241	0.0263368	2	zgc:194839
ppp1r1b1	7.42314e-06	0.113733	0.313	0.241	0.121843	2	ppp1r1b
cygb11	7.81684e-06	0.213973	0.306	0.245	0.128306	2	cygb1
wnk1b	0.000384567	0.104483	0.298	0.245	1	2	wnk1b
nrxn2b1	2.33917e-05	0.153726	0.308	0.248	0.383951	2	nrxn2b
rapgef21	0.000394237	0.107559	0.306	0.249	1	2	rapgef2
slc38a3b	6.9398e-06	0.13019	0.34	0.269	0.11391	2	slc38a3b
hmgn31	2.43028e-09	0.162988	0.382	0.278	3.98907e-05	2	hmgn3
pam1	5.2285e-07	0.11541	0.371	0.287	0.00858206	2	pam
si:ch211-250c4.41	6.28647e-05	0.120008	0.353	0.287	1	2	si:ch211-250c4.4
cldn11b1	2.91444e-07	0.138528	0.38	0.292	0.00478377	2	cldn11b
PDE3B1	2.59044e-05	0.118453	0.362	0.295	0.425195	2	PDE3B
itga91	3.73524e-05	0.103938	0.373	0.301	0.613102	2	itga9
ppfibp1b1	0.000340863	0.115672	0.364	0.309	1	2	ppfibp1b
kank4	2.11308e-10	0.17536	0.419	0.316	3.46841e-06	2	kank4
notch1b1	1.11805e-14	0.224982	0.438	0.317	1.83517e-10	2	notch1b
ccdc3a1	2.49096e-07	0.127806	0.41	0.32	0.00408866	2	ccdc3a
rgcc1	1.13054e-11	0.404101	0.428	0.331	1.85567e-07	2	rgcc
mapre3b1	0.000180788	0.106779	0.393	0.337	1	2	mapre3b
si:dkey-177p2.6	0.000361864	0.109989	0.39	0.34	1	2	si:dkey-177p2.6
sdk1a1	3.73919e-12	0.206531	0.452	0.346	6.1375e-08	2	sdk1a
dock9b1	0.000181963	0.139397	0.401	0.35	1	2	dock9b
ampd2b1	0.000667376	0.109694	0.404	0.353	1	2	ampd2b
ppl1	1.98109e-05	0.197951	0.407	0.355	0.325177	2	ppl
ccser2a	3.81461e-05	0.116465	0.419	0.356	0.62613	2	ccser2a
ano5b	0.000583338	0.139143	0.402	0.371	1	2	ano5b
si:dkey-97a13.6	1.16538e-06	0.162197	0.447	0.377	0.0191285	2	si:dkey-97a13.6
slc43a3b1	0.000381584	0.181207	0.402	0.38	1	2	slc43a3b
CABZ01068367.11	7.58649e-05	0.12352	0.438	0.383	1	2	CABZ01068367.1
msi2a	0.00015555	0.12437	0.44	0.394	1	2	msi2a
vasnb1	9.69816e-10	0.249648	0.487	0.407	1.59186e-05	2	vasnb
si:ch73-217n20.11	0.00544538	0.133874	0.441	0.414	1	2	si:ch73-217n20.1
si:dkey-31f5.11	3.82043e-06	0.167341	0.474	0.423	0.0627086	2	si:dkey-31f5.11
htra1b1	4.12462e-07	0.175123	0.51	0.43	0.00677016	2	htra1b
pgm21	7.5987e-08	0.182385	0.507	0.433	0.00124725	2	pgm2
slc8a4b	2.44264e-13	0.222337	0.538	0.437	4.00934e-09	2	slc8a4b
dab2ipb	2.04934e-05	0.148323	0.496	0.447	0.336378	2	dab2ipb
rbp51	8.86586e-07	0.26935	0.48	0.451	0.0145524	2	rbp5
fam120a1	0.000250752	0.166268	0.48	0.467	1	2	fam120a
COLEC10	1.76987e-14	0.358024	0.538	0.476	2.90506e-10	2	COLEC10
fbln51	8.80182e-13	0.408107	0.55	0.476	1.44473e-08	2	fbln5
mef2aa1	0.000943059	0.116948	0.507	0.476	1	2	mef2aa
plekhg41	2.12074e-18	0.326086	0.565	0.481	3.48099e-14	2	plekhg4
nrp2a1	3.35785e-13	0.225625	0.58	0.482	5.51158e-09	2	nrp2a
slc7a10a1	1.66874e-12	0.272671	0.545	0.489	2.73906e-08	2	slc7a10a
hey21	0.00264089	0.13325	0.496	0.492	1	2	hey2
atp5mc3a	4.11517e-06	0.21971	0.496	0.502	0.0675464	2	atp5mc3a
slit21	5.86801e-10	0.227702	0.562	0.506	9.63175e-06	2	slit2
sort1a1	2.05932e-15	0.28028	0.61	0.515	3.38017e-11	2	sort1a
kidins220a1	0.000151761	0.16668	0.528	0.522	1	2	kidins220a
aldh1a21	6.33119e-07	0.187499	0.565	0.529	0.010392	2	aldh1a2
akap12b1	6.18269e-08	0.141231	0.657	0.572	0.00101483	2	akap12b
slc7a3a1	0.000824317	0.154599	0.56	0.577	1	2	slc7a3a
cldn7a	1.93955e-17	0.42707	0.642	0.581	3.18358e-13	2	cldn7a
ackr4b1	4.69447e-06	0.194736	0.566	0.588	0.077055	2	ackr4b
fxyd6l1	6.02356e-23	0.28606	0.762	0.604	9.88707e-19	2	fxyd6l
colec111	3.42031e-21	0.337605	0.711	0.617	5.6141e-17	2	colec11
pik3ip1	8.75469e-53	0.504302	0.77	0.632	1.437e-48	2	pik3ip1
ptprfb1	2.95383e-26	0.310708	0.727	0.64	4.84841e-22	2	ptprfb
cnbpb	6.608e-10	0.207998	0.638	0.654	1.08464e-05	2	cnbpb
CABZ01068358.11	3.41828e-05	0.18431	0.626	0.659	0.561076	2	CABZ01068358.1
slc38a5b1	0.0012178	0.118919	0.639	0.663	1	2	slc38a5b
pkma1	5.06084e-10	0.196726	0.678	0.679	8.30685e-06	2	pkma
pdgfra1	2.29816e-50	0.421264	0.909	0.684	3.77221e-46	2	pdgfra
col4a61	3.25945e-20	0.273868	0.766	0.712	5.35006e-16	2	col4a6
h3f3b.1	1.11879e-05	0.137851	0.669	0.714	0.183639	2	h3f3b.1
bmpr2a1	9.04472e-17	0.234234	0.77	0.717	1.4846e-12	2	bmpr2a
marcksl1a1	2.94125e-13	0.112215	0.876	0.725	4.82777e-09	2	marcksl1a
edf1	0.00183772	0.104065	0.654	0.732	1	2	edf1
uck2a1	2.17202e-06	0.130934	0.787	0.733	0.0356515	2	uck2a
si:dkey-7j14.61	5.79875e-05	0.126413	0.697	0.734	0.951807	2	si:dkey-7j14.6
marcksl1b1	2.63119e-25	0.199226	0.92	0.742	4.31884e-21	2	marcksl1b
gstt1b1	1.2165e-17	0.244113	0.788	0.746	1.99676e-13	2	gstt1b
psap1	2.57865e-06	0.13481	0.732	0.775	0.0423259	2	psap
atrx	6.63417e-17	0.226004	0.797	0.777	1.08893e-12	2	atrx
col4a51	5.08112e-21	0.247828	0.852	0.795	8.34014e-17	2	col4a5
cad	1.84518e-22	0.263428	0.861	0.796	3.02867e-18	2	cad
atp1a1a.11	2.7087e-54	0.408956	0.887	0.799	4.44606e-50	2	atp1a1a.1
slc25a3b1	8.48656e-06	0.104409	0.736	0.802	0.139298	2	slc25a3b
srpra1	2.85835e-12	0.175832	0.83	0.803	4.69169e-08	2	srpra
gapdhs1	5.72046e-22	0.236185	0.855	0.831	9.38956e-18	2	gapdhs
gmps1	1.47393e-31	0.29541	0.9	0.836	2.4193e-27	2	gmps
pnp4a1	3.74706e-28	0.328194	0.949	0.846	6.15042e-24	2	pnp4a
gabarapb1	5.3762e-07	0.115425	0.803	0.857	0.0088245	2	gabarapb
zgc:1748631	7.66082e-32	0.267861	0.917	0.873	1.25745e-27	2	zgc:174863
cox4i1	1.27424e-18	0.189189	0.86	0.873	2.09154e-14	2	cox4i1
hsd17b11	8.2777e-31	0.258489	0.958	0.882	1.3587e-26	2	hsd17b1
cdh11	1.62377e-44	0.344397	0.96	0.884	2.66526e-40	2	cdh1
mt-nd1	3.81308e-18	0.194739	0.936	0.908	6.25878e-14	2	mt-nd1
mt-nd21	5.06718e-08	0.114836	0.902	0.91	0.000831727	2	mt-nd2
aldoaa1	2.67121e-13	0.14656	0.914	0.911	4.38452e-09	2	aldoaa
ivns1abpa1	3.6617e-52	0.327942	0.993	0.919	6.01032e-48	2	ivns1abpa
oaz1b1	2.60554e-17	0.165853	0.943	0.92	4.27673e-13	2	oaz1b
rpl291	2.1809e-17	0.189822	0.928	0.925	3.57972e-13	2	rpl29
appa1	5.62877e-57	0.353156	0.985	0.93	9.23907e-53	2	appa
notch31	3.42265e-47	0.295311	0.996	0.933	5.61794e-43	2	notch3
selenop1	3.78861e-41	0.296021	0.972	0.938	6.21862e-37	2	selenop
ecm1b1	3.63566e-39	0.269828	1	0.946	5.96757e-35	2	ecm1b
b2ml1	9.39696e-08	0.114436	0.943	0.946	0.00154242	2	b2ml
oaz1a1	1.64862e-56	0.360207	0.984	0.947	2.70604e-52	2	oaz1a
glulb1	5.10017e-47	0.281712	1	0.952	8.37141e-43	2	glulb
dap1b1	3.91452e-100	0.470417	1	0.958	6.42529e-96	2	dap1b
tpt11	1.05488e-20	0.161617	0.979	0.962	1.73148e-16	2	tpt1
mt-nd41	1.43893e-28	0.195655	0.985	0.965	2.36186e-24	2	mt-nd4
alcama1	7.81871e-16	0.119026	0.994	0.973	1.28336e-11	2	alcama
cldn11a1	3.15038e-44	0.295219	0.997	0.977	5.17104e-40	2	cldn11a
atp5mc3b1	1.93481e-28	0.193999	0.999	0.978	3.1758e-24	2	atp5mc3b
ponzr11	2.68936e-51	0.276841	0.996	0.981	4.41431e-47	2	ponzr1
itm2bb1	3.6652e-32	0.206195	1	0.981	6.01605e-28	2	itm2bb
rps27.2	8.27689e-14	0.108454	0.985	0.987	1.35857e-09	2	rps27.2
rpl33	8.28807e-10	0.10025	0.999	0.989	1.3604e-05	2	rpl3
SERP1	1.10888e-68	0.284304	1	0.992	1.82012e-64	2	SERP1
mt-atp61	4.31163e-25	0.16613	1	0.995	7.07712e-21	2	mt-atp6
rpl301	6.71335e-12	0.100452	1	0.995	1.10193e-07	2	rpl30
rpl361	4.14709e-17	0.132428	1	0.996	6.80704e-13	2	rpl36
rpl351	5.09396e-25	0.143202	1	0.998	8.36123e-21	2	rpl35
rps31	5.71327e-25	0.152383	1	0.998	9.37777e-21	2	rps3
rpl381	8.30121e-23	0.165588	0.999	0.998	1.36256e-18	2	rpl38
naca1	1.11126e-18	0.122476	1	0.998	1.82402e-14	2	naca
nme2b.11	5.73548e-18	0.116823	1	0.998	9.41422e-14	2	nme2b.1
rpl36a1	7.94364e-34	0.162564	1	0.999	1.30387e-29	2	rpl36a
rpl7a1	1.80434e-30	0.13896	1	0.999	2.96164e-26	2	rpl7a
rps26l1	7.76394e-29	0.163312	1	0.999	1.27437e-24	2	rps26l
faua1	1.04036e-27	0.138656	1	0.999	1.70764e-23	2	faua
RPS171	9.08709e-26	0.137268	1	0.999	1.49155e-21	2	RPS17
rpl271	4.24264e-22	0.127837	1	0.999	6.96386e-18	2	rpl27
rack11	1.73782e-19	0.124056	1	0.999	2.85245e-15	2	rack1
rps29	6.17779e-18	0.131051	1	0.999	1.01402e-13	2	rps29
rps251	4.73611e-17	0.10986	1	0.999	7.77386e-13	2	rps25
rplp2l1	1.26159e-11	0.102018	1	0.999	2.07078e-07	2	rplp2l
mt-cyb	4.16879e-68	0.201544	1	1	6.84265e-64	2	mt-cyb
mt-co21	2.09695e-58	0.172532	1	1	3.44194e-54	2	mt-co2
slc25a51	5.51502e-52	0.219056	1	1	9.05235e-48	2	slc25a5
rplp11	2.30704e-51	0.190273	1	1	3.78678e-47	2	rplp1
mt-co1	1.10072e-45	0.161992	1	1	1.80673e-41	2	mt-co1
RPL37A1	2.45241e-40	0.179812	1	1	4.02539e-36	2	RPL37A
rpl281	1.49187e-36	0.145636	1	1	2.44876e-32	2	rpl28
rpl211	2.43239e-36	0.152978	1	1	3.99252e-32	2	rpl21
rps15a1	1.9906e-34	0.153552	1	1	3.26736e-30	2	rps15a
rpl81	1.24207e-31	0.149546	1	1	2.03874e-27	2	rpl8
rpl321	3.04846e-30	0.143782	1	1	5.00373e-26	2	rpl32
rps121	4.76958e-30	0.147023	1	1	7.82878e-26	2	rps12
rpl391	7.73257e-30	0.165051	1	1	1.26922e-25	2	rpl39
rps131	2.1156e-29	0.134839	1	1	3.47255e-25	2	rps13
rpl13a1	3.61294e-28	0.121833	1	1	5.93029e-24	2	rpl13a
rps71	3.96395e-27	0.134775	1	1	6.50643e-23	2	rps7
rpl131	9.2619e-27	0.122752	1	1	1.52025e-22	2	rpl13
rps151	3.2403e-26	0.120824	1	1	5.31863e-22	2	rps15
rpl241	4.94206e-26	0.128383	1	1	8.11189e-22	2	rpl24
rps161	1.01743e-24	0.129787	1	1	1.67002e-20	2	rps16
rpl35a1	4.99171e-24	0.138588	1	1	8.19339e-20	2	rpl35a
rps191	8.36255e-24	0.124778	1	1	1.37263e-19	2	rps19
rpl71	7.48698e-23	0.120829	1	1	1.22891e-18	2	rpl7
rps241	5.82899e-22	0.120361	1	1	9.56771e-18	2	rps24
rps101	2.82237e-21	0.10608	1	1	4.63264e-17	2	rps10
rpl181	9.74357e-21	0.11191	1	1	1.59931e-16	2	rpl18
rpl37.11	2.11383e-20	0.133352	1	1	3.46963e-16	2	rpl37.1
rps211	3.31282e-20	0.140045	1	1	5.43766e-16	2	rps21
mt-co31	1.3451e-19	0.12142	1	1	2.20784e-15	2	mt-co3
rps8a1	2.75033e-19	0.111959	1	1	4.51439e-15	2	rps8a
rpl18a1	2.76483e-18	0.114652	1	1	4.5382e-14	2	rpl18a
rps3a1	9.08894e-18	0.108982	1	1	1.49186e-13	2	rps3a
rps111	1.44532e-17	0.10507	1	1	2.37235e-13	2	rps11
rpl171	3.74433e-17	0.104718	1	1	6.14595e-13	2	rpl17
uba521	5.44571e-17	0.102406	1	1	8.93858e-13	2	uba52
rpl111	6.10656e-17	0.101352	1	1	1.00233e-12	2	rpl11
rpl311	2.17676e-16	0.110014	1	1	3.57293e-12	2	rpl31
rps281	5.71988e-15	0.117519	1	1	9.38861e-11	2	rps28
rps91	1.29544e-14	0.105401	1	1	2.12633e-10	2	rps9

## Sheet: Stage IB (SC 4)
	p_val	avg_logFC	pct.1	pct.2	p_val_adj	cluster	gene
pcna	0	1.61914	0.749	0.026	0	4	pcna
mcm4	0	0.911756	0.715	0.037	0	4	mcm4
mcm2	0	1.11761	0.821	0.053	0	4	mcm2
mcm6	0	1.13508	0.923	0.068	0	4	mcm6
mcm3	1.94643e-299	0.892882	0.787	0.054	3.19487e-295	4	mcm3
cdca7a	3.05452e-278	0.941006	0.657	0.036	5.0137e-274	4	cdca7a
mcm5	2.34756e-277	1.02372	0.768	0.056	3.85329e-273	4	mcm5
rpa2	2.29289e-236	0.602554	0.435	0.014	3.76355e-232	4	rpa2
fen1	3.94498e-236	0.553025	0.401	0.01	6.4753e-232	4	fen1
si:ch211-156b7.4	1.12755e-231	0.594032	0.415	0.012	1.85077e-227	4	si:ch211-156b7.4
hells	1.31052e-217	0.548298	0.411	0.014	2.15109e-213	4	hells
chaf1a	2.16729e-214	0.625317	0.444	0.018	3.55739e-210	4	chaf1a
selenoh	1.56365e-203	1.04633	0.744	0.079	2.56658e-199	4	selenoh
rpa1	5.21292e-185	0.505913	0.435	0.022	8.55649e-181	4	rpa1
FP101861.1	1.53437e-176	0.381005	0.391	0.018	2.51852e-172	4	FP101861.1
rbbp4	1.46771e-164	0.644453	0.522	0.043	2.4091e-160	4	rbbp4
dnph1	5.37557e-161	0.336602	0.377	0.019	8.82346e-157	4	dnph1
lig1	1.13072e-150	0.469879	0.353	0.018	1.85596e-146	4	lig1
dhfr	5.01979e-150	0.397084	0.28	0.009	8.23949e-146	4	dhfr
gins1	1.24999e-146	0.321106	0.377	0.022	2.05173e-142	4	gins1
rfc4	1.60986e-140	0.429127	0.324	0.016	2.64242e-136	4	rfc4
chtf8	5.67977e-140	0.306159	0.242	0.006	9.32277e-136	4	chtf8
orc6	7.63203e-138	0.40231	0.304	0.014	1.25272e-133	4	orc6
rpa3	3.21534e-130	0.587318	0.396	0.03	5.27766e-126	4	rpa3
orc4	2.25101e-129	0.286482	0.213	0.005	3.6948e-125	4	orc4
stmn1a	2.71846e-125	1.03517	0.478	0.05	4.46208e-121	4	stmn1a
msh6	7.87425e-121	0.430541	0.401	0.035	1.29248e-116	4	msh6
tubb2b1	1.89343e-118	0.751097	0.493	0.057	3.10788e-114	4	tubb2b
tyms	7.11531e-102	0.244829	0.198	0.007	1.16791e-97	4	tyms
dnajc9	1.79746e-101	0.383028	0.29	0.02	2.95036e-97	4	dnajc9
gins2	1.98225e-101	0.284339	0.208	0.008	3.25366e-97	4	gins2
pole4	5.07032e-99	0.373929	0.324	0.027	8.32243e-95	4	pole4
rfc5	6.74319e-92	0.381671	0.411	0.05	1.10683e-87	4	rfc5
adssl	6.28782e-91	0.550095	0.541	0.09	1.03208e-86	4	adssl
si:dkey-6i22.5	8.09882e-91	0.310543	0.28	0.022	1.32934e-86	4	si:dkey-6i22.5
uhrf1	2.14682e-90	0.322953	0.386	0.044	3.52379e-86	4	uhrf1
gins4	3.29533e-90	0.265776	0.295	0.024	5.40895e-86	4	gins4
prim2	7.33739e-88	0.286505	0.329	0.032	1.20436e-83	4	prim2
ubr7	7.4335e-87	0.406842	0.425	0.056	1.22013e-82	4	ubr7
rrm1	4.29661e-86	0.377487	0.261	0.019	7.05246e-82	4	rrm1
cbx5	5.51565e-85	0.696803	0.85	0.247	9.05338e-81	4	cbx5
rnaseh2a	4.0843e-82	0.306537	0.246	0.018	6.70397e-78	4	rnaseh2a
dut	5.703e-82	0.44136	0.266	0.022	9.3609e-78	4	dut
banf1	5.31032e-80	0.660116	0.696	0.174	8.71637e-76	4	banf1
sumo3b	8.30995e-77	0.430099	0.396	0.055	1.36399e-72	4	sumo3b
hmga1a	8.71343e-76	0.765699	0.768	0.224	1.43022e-71	4	hmga1a
mis12	9.6637e-75	0.20544	0.232	0.018	1.5862e-70	4	mis12
shmt1	2.25616e-73	0.237466	0.203	0.013	3.70326e-69	4	shmt1
lrwd1	7.47889e-72	0.195213	0.217	0.016	1.22759e-67	4	lrwd1
snrpd1	9.49618e-71	0.573603	0.517	0.102	1.5587e-66	4	snrpd1
rfc3	2.5303e-68	0.195582	0.179	0.011	4.15323e-64	4	rfc3
hmgb2b	3.52611e-68	0.753637	0.86	0.322	5.78776e-64	4	hmgb2b
prim1	6.23695e-66	0.123731	0.101	0.002	1.02373e-61	4	prim1
ppm1g	9.87655e-64	0.460605	0.502	0.106	1.62114e-59	4	ppm1g
pold1	6.10452e-61	0.139165	0.106	0.003	1.002e-56	4	pold1
atad2	9.26721e-61	0.215798	0.227	0.022	1.52112e-56	4	atad2
orc5	8.14231e-60	0.24743	0.295	0.039	1.33648e-55	4	orc5
snu13b	5.84247e-58	0.578337	0.657	0.185	9.58984e-54	4	snu13b
nup37	1.64574e-57	0.210242	0.164	0.011	2.70131e-53	4	nup37
atp5mc11	1.78447e-57	0.692158	0.816	0.306	2.92903e-53	4	atp5mc1
nutf2l	4.59644e-56	0.4788	0.319	0.05	7.5446e-52	4	nutf2l
h2afvb1	6.06711e-56	0.616316	0.662	0.2	9.95855e-52	4	h2afvb
ivns1abpb	7.19856e-56	0.256277	0.222	0.023	1.18157e-51	4	ivns1abpb
fbl	1.19017e-55	0.538446	0.758	0.244	1.95355e-51	4	fbl
ube2t	2.79735e-55	0.126533	0.101	0.003	4.59157e-51	4	ube2t
msh2	4.34241e-55	0.167748	0.135	0.007	7.12764e-51	4	msh2
si:ch211-222l21.11	4.71671e-54	0.562652	0.599	0.156	7.742e-50	4	si:ch211-222l21.1
apex1	1.55162e-53	0.382809	0.396	0.077	2.54682e-49	4	apex1
folr1	2.01162e-52	0.626084	0.729	0.24	3.30188e-48	4	folr
seta	3.84799e-52	0.561981	0.884	0.367	6.31609e-48	4	seta
tert	1.05696e-51	0.160374	0.179	0.016	1.73489e-47	4	tert
tuba8l	1.71034e-51	0.44374	0.604	0.17	2.80736e-47	4	tuba8l
npm1a1	3.39877e-50	0.632563	0.894	0.424	5.57875e-46	4	npm1a
sub1a	1.38213e-49	0.554625	0.836	0.338	2.26863e-45	4	sub1a
anp32b	3.99667e-49	0.413447	0.58	0.162	6.56013e-45	4	anp32b
si:ch211-161h7.4	5.4096e-49	0.235989	0.275	0.042	8.87932e-45	4	si:ch211-161h7.4
dkc1	6.57995e-49	0.506469	0.643	0.207	1.08003e-44	4	dkc1
rnaseh2c	5.66593e-48	0.200708	0.174	0.016	9.30005e-44	4	rnaseh2c
h3f3a	1.62128e-47	0.593746	0.71	0.238	2.66116e-43	4	h3f3a
tuba8l42	2.72044e-47	0.683353	0.889	0.403	4.46533e-43	4	tuba8l4
pola1	7.16324e-47	0.248404	0.271	0.042	1.17577e-42	4	pola1
cdca7b	9.0933e-47	0.264841	0.193	0.021	1.49257e-42	4	cdca7b
lmnb2	9.3297e-47	0.358063	0.541	0.158	1.53138e-42	4	lmnb2
pole	1.36447e-46	0.139686	0.159	0.014	2.23964e-42	4	pole
prmt1	2.25783e-46	0.477589	0.609	0.185	3.706e-42	4	prmt1
gmds1	4.40646e-46	0.983081	0.768	0.355	7.23276e-42	4	gmds
pdia21	5.10852e-46	0.758255	0.643	0.225	8.38512e-42	4	pdia2
ssrp1a	9.37759e-46	0.236812	0.237	0.032	1.53924e-41	4	ssrp1a
nansa1	1.11676e-44	0.540356	0.531	0.153	1.83305e-40	4	nansa
gne1	1.14914e-44	0.542172	0.618	0.204	1.8862e-40	4	gne
si:ch211-288g17.31	1.17406e-44	0.451277	0.749	0.275	1.9271e-40	4	si:ch211-288g17.3
dnmt1	1.35555e-44	0.313468	0.232	0.032	2.22501e-40	4	dnmt1
snrpe	1.40902e-44	0.426223	0.435	0.105	2.31277e-40	4	snrpe
snrpd2	1.60105e-44	0.388673	0.527	0.146	2.62797e-40	4	snrpd2
fbln52	3.44793e-44	0.725031	0.894	0.468	5.65944e-40	4	fbln5
snrpg	4.24352e-44	0.30579	0.372	0.079	6.96531e-40	4	snrpg
pa2g4a	1.53407e-43	0.407392	0.551	0.162	2.51802e-39	4	pa2g4a
abce1	2.56736e-43	0.324754	0.367	0.079	4.21407e-39	4	abce1
setb	3.56949e-43	0.523629	0.792	0.325	5.85896e-39	4	setb
chaf1b	8.20628e-43	0.158935	0.135	0.011	1.34698e-38	4	chaf1b
snrpb	1.54654e-42	0.495518	0.633	0.213	2.53849e-38	4	snrpb
gins3	2.01663e-42	0.147142	0.121	0.008	3.3101e-38	4	gins3
col18a1a1	2.79111e-42	0.330212	0.362	0.077	4.58133e-38	4	col18a1a
sub1b1	9.43085e-42	0.36954	0.531	0.156	1.54798e-37	4	sub1b
mrpl11	2.70352e-41	0.303076	0.372	0.084	4.43756e-37	4	mrpl11
mcmbp	4.23178e-41	0.168887	0.145	0.013	6.94604e-37	4	mcmbp
nop10	5.08407e-41	0.426624	0.715	0.265	8.34499e-37	4	nop10
nudt1	5.8038e-41	0.338627	0.435	0.117	9.52635e-37	4	nudt1
CABZ01005379.1	7.43424e-41	0.169482	0.227	0.034	1.22026e-36	4	CABZ01005379.1
unga	2.25469e-40	0.172209	0.126	0.01	3.70085e-36	4	unga
cct31	4.21509e-40	0.598868	0.879	0.482	6.91866e-36	4	cct3
hmgb2a1	1.9357e-39	0.518885	0.7	0.269	3.17726e-35	4	hmgb2a
zgc:56304	2.18897e-39	0.341898	0.488	0.139	3.59297e-35	4	zgc:56304
ppa1b	9.29936e-39	0.278519	0.333	0.072	1.5264e-34	4	ppa1b
tfam	1.29275e-37	0.315421	0.454	0.133	2.12191e-33	4	tfam
cx34.51	3.34023e-37	0.561898	0.773	0.338	5.48266e-33	4	cx34.5
srsf10b	5.48337e-37	0.234535	0.266	0.05	9.00041e-33	4	srsf10b
aaas	1.29567e-36	0.150295	0.116	0.009	2.12671e-32	4	aaas
cox6b1	2.99153e-36	0.277752	0.372	0.092	4.9103e-32	4	cox6b1
hmgb3b	3.13076e-36	0.368956	0.614	0.211	5.13882e-32	4	hmgb3b
vldlr	1.27465e-35	0.23995	0.246	0.045	2.0922e-31	4	vldlr
txnrd3	1.6e-35	0.236241	0.266	0.051	2.62625e-31	4	txnrd3
mrpl20	1.70791e-35	0.247471	0.295	0.061	2.80336e-31	4	mrpl20
supt16h	2.02005e-35	0.309087	0.391	0.104	3.3157e-31	4	supt16h
hnrnpabb	2.56524e-35	0.52503	0.725	0.287	4.21058e-31	4	hnrnpabb
eif4a1a	3.03822e-35	0.421838	0.58	0.198	4.98693e-31	4	eif4a1a
frmd61	5.56647e-35	0.395947	0.768	0.347	9.1368e-31	4	frmd6
hnrnpa1b	5.7416e-35	0.504676	0.754	0.331	9.42426e-31	4	hnrnpa1b
mt-atp62	7.66484e-35	0.379533	1	0.995	1.25811e-30	4	mt-atp6
eif4h	8.09821e-35	0.30348	0.401	0.108	1.32924e-30	4	eif4h
ddx39ab	2.97826e-34	0.367281	0.401	0.107	4.88851e-30	4	ddx39ab
bxdc2	3.95772e-34	0.266902	0.304	0.067	6.49619e-30	4	bxdc2
cirbpa1	4.53819e-34	0.527018	0.899	0.525	7.44899e-30	4	cirbpa
nap1l1	5.52481e-34	0.365908	0.367	0.096	9.06842e-30	4	nap1l1
cox5ab	6.03821e-34	0.366014	0.575	0.201	9.91112e-30	4	cox5ab
bysl	7.47584e-34	0.309251	0.43	0.123	1.22708e-29	4	bysl
smarcad1a	8.74949e-34	0.127067	0.101	0.007	1.43614e-29	4	smarcad1a
cmasa1	9.96102e-34	0.477152	0.831	0.4	1.635e-29	4	cmasa
ppiab	1.20363e-33	0.396203	0.99	0.862	1.97565e-29	4	ppiab
dscc1	1.47569e-33	0.122781	0.145	0.017	2.4222e-29	4	dscc1
odc1	2.21073e-33	0.463598	0.749	0.322	3.6287e-29	4	odc1
atad5a	3.76371e-33	0.239263	0.271	0.056	6.17776e-29	4	atad5a
snrpf1	4.39278e-33	0.372364	0.686	0.268	7.2103e-29	4	snrpf
prdx3	6.18778e-33	0.308829	0.478	0.149	1.01566e-28	4	prdx3
ahcy1	6.48754e-33	0.313175	0.44	0.13	1.06486e-28	4	ahcy
mrpl12	8.38105e-33	0.304151	0.464	0.141	1.37567e-28	4	mrpl12
nedd8	9.95474e-33	0.233766	0.329	0.078	1.63397e-28	4	nedd8
eif4e1c	1.35999e-32	0.235349	0.28	0.06	2.23229e-28	4	eif4e1c
sp100.1	2.06152e-32	0.134471	0.159	0.021	3.38378e-28	4	sp100.1
tma7	2.36025e-32	0.425361	0.729	0.309	3.87411e-28	4	tma7
si:ch73-281n10.2	3.81267e-32	0.462324	0.85	0.444	6.25811e-28	4	si:ch73-281n10.2
bckdhb1	6.21524e-32	0.301636	0.464	0.145	1.02017e-27	4	bckdhb
nsmce4a	6.63828e-32	0.110809	0.111	0.01	1.08961e-27	4	nsmce4a
cbx1a	8.22655e-32	0.381662	0.638	0.246	1.35031e-27	4	cbx1a
ccnd2a	8.2674e-32	0.429208	0.7	0.315	1.35701e-27	4	ccnd2a
ssb	1.55797e-31	0.277078	0.372	0.101	2.55724e-27	4	ssb
cdk2	1.77177e-31	0.128876	0.111	0.01	2.90818e-27	4	cdk2
pola2	1.88494e-31	0.134349	0.164	0.023	3.09394e-27	4	pola2
si:dkeyp-55f12.3	2.18601e-31	0.2056	0.179	0.027	3.58812e-27	4	si:dkeyp-55f12.3
parp1	1.37714e-30	0.294504	0.517	0.19	2.26044e-26	4	parp1
eif61	1.45022e-30	0.291315	0.522	0.178	2.38039e-26	4	eif6
tpi1b	1.48884e-30	0.308366	0.488	0.16	2.44378e-26	4	tpi1b
ranbp1	2.12922e-30	0.411399	0.831	0.417	3.4949e-26	4	ranbp1
kpnb3	2.32841e-30	0.257325	0.348	0.091	3.82186e-26	4	kpnb3
ipo71	2.90057e-30	0.339922	0.556	0.202	4.761e-26	4	ipo7
nop58	2.98692e-30	0.361207	0.696	0.288	4.90272e-26	4	nop58
taf15	3.24925e-30	0.347985	0.362	0.101	5.33332e-26	4	taf15
hspd1	8.31168e-30	0.386304	0.652	0.267	1.36428e-25	4	hspd1
dusp51	8.57197e-30	0.392447	0.58	0.221	1.407e-25	4	dusp5
timm8b	1.02848e-29	0.262186	0.377	0.107	1.68815e-25	4	timm8b
rbx1	1.1878e-29	0.313566	0.705	0.284	1.94965e-25	4	rbx1
uck2b	1.52109e-29	0.181383	0.169	0.026	2.49671e-25	4	uck2b
abcf1	1.59263e-29	0.290779	0.406	0.12	2.61414e-25	4	abcf1
chchd10	2.3501e-29	0.230799	0.3	0.072	3.85746e-25	4	chchd10
rad51	2.55134e-29	0.120061	0.092	0.007	4.18777e-25	4	rad51
sulf2b1	2.65678e-29	0.51758	0.87	0.521	4.36083e-25	4	sulf2b
slc11a21	3.21823e-29	0.303763	0.435	0.137	5.28241e-25	4	slc11a2
rpl22l11	3.84665e-29	0.45278	0.966	0.67	6.31389e-25	4	rpl22l1
mblac1	4.24752e-29	0.159946	0.198	0.036	6.97187e-25	4	mblac1
tuba1c	5.12064e-29	0.144411	0.188	0.032	8.40501e-25	4	tuba1c
tomm20a	5.87383e-29	0.358805	0.425	0.134	9.64131e-25	4	tomm20a
nifk	8.71125e-29	0.256707	0.362	0.102	1.42987e-24	4	nifk
rbb4l	9.62654e-29	0.205012	0.251	0.054	1.5801e-24	4	rbb4l
h2afx	1.18423e-28	0.243369	0.237	0.049	1.94379e-24	4	h2afx
asf1ba	1.55536e-28	0.124767	0.082	0.006	2.55297e-24	4	asf1ba
cdkn1cb	2.51584e-28	0.11176	0.126	0.015	4.12951e-24	4	cdkn1cb
tktb1	2.68788e-28	0.268572	0.551	0.195	4.41188e-24	4	tktb
polr2d	3.47332e-28	0.286681	0.473	0.162	5.7011e-24	4	polr2d
cdkn2aipnl	3.75326e-28	0.267888	0.348	0.099	6.16061e-24	4	cdkn2aipnl
btg3	4.18568e-28	0.240439	0.324	0.086	6.87038e-24	4	btg3
si:ch211-51e12.7	5.11889e-28	0.278328	0.401	0.123	8.40215e-24	4	si:ch211-51e12.7
got2b1	6.43781e-28	0.291549	0.522	0.185	1.0567e-23	4	got2b
mt-nd11	7.17291e-28	0.370208	1	0.908	1.17736e-23	4	mt-nd1
c1qbp	7.64077e-28	0.338163	0.671	0.283	1.25416e-23	4	c1qbp
arpp19b	1.22614e-27	0.248647	0.3	0.077	2.01259e-23	4	arpp19b
npm3	1.42264e-27	0.28744	0.444	0.148	2.33513e-23	4	npm3
polr2h	2.20439e-27	0.151978	0.155	0.023	3.61828e-23	4	polr2h
dcps	3.31275e-27	0.158549	0.193	0.036	5.43754e-23	4	dcps
prdx4	3.63661e-27	0.290125	0.522	0.189	5.96913e-23	4	prdx4
gfra31	5.21759e-27	0.295083	0.386	0.127	8.56415e-23	4	gfra3
srsf1a	7.10616e-27	0.285286	0.411	0.131	1.16641e-22	4	srsf1a
slc25a15a	7.84774e-27	0.143171	0.174	0.03	1.28813e-22	4	slc25a15a
dek	8.80967e-27	0.241992	0.444	0.156	1.44602e-22	4	dek
TXN	9.17106e-27	0.365521	0.986	0.794	1.50534e-22	4	TXN
tomm22	1.10994e-26	0.24851	0.338	0.096	1.82186e-22	4	tomm22
prpf19	1.13589e-26	0.232729	0.295	0.076	1.86445e-22	4	prpf19
p4ha1b1	1.2489e-26	0.410076	0.647	0.279	2.04995e-22	4	p4ha1b
calm3b	1.40716e-26	0.357291	0.841	0.422	2.30971e-22	4	calm3b
ptges3b	2.00019e-26	0.202654	0.237	0.052	3.28311e-22	4	ptges3b
srprb	2.15443e-26	0.27068	0.483	0.17	3.53628e-22	4	srprb
cycsb1	2.20339e-26	0.330202	0.652	0.274	3.61664e-22	4	cycsb
cenpx	4.49919e-26	0.127783	0.087	0.007	7.38498e-22	4	cenpx
ilf2	5.31744e-26	0.323296	0.43	0.149	8.72805e-22	4	ilf2
phb	6.72363e-26	0.244023	0.353	0.104	1.10362e-21	4	phb
api5	6.74342e-26	0.227906	0.382	0.117	1.10686e-21	4	api5
mt-nd22	7.05976e-26	0.34093	0.976	0.905	1.15879e-21	4	mt-nd2
cct51	1.69497e-25	0.348162	0.739	0.351	2.78212e-21	4	cct5
srsf2a	1.87669e-25	0.305425	0.444	0.152	3.08039e-21	4	srsf2a
hnrnpa0b	1.90424e-25	0.356324	0.884	0.48	3.12561e-21	4	hnrnpa0b
snrpc	2.01085e-25	0.240714	0.348	0.104	3.30062e-21	4	snrpc
lsm7	2.541e-25	0.244216	0.411	0.134	4.1708e-21	4	lsm7
eif5a21	4.9092e-25	0.347399	0.599	0.247	8.05797e-21	4	eif5a2
morf4l1	4.9498e-25	0.26862	0.585	0.228	8.1246e-21	4	morf4l1
lrp1aa1	5.22462e-25	0.304462	0.56	0.229	8.5757e-21	4	lrp1aa
wee1	7.38576e-25	0.160195	0.203	0.043	1.2123e-20	4	wee1
e2f3	8.05309e-25	0.147445	0.174	0.032	1.32183e-20	4	e2f3
rb1	9.63199e-25	0.103927	0.087	0.008	1.58099e-20	4	rb1
dnmt3ba	1.1575e-24	0.120108	0.145	0.023	1.89992e-20	4	dnmt3ba
hnrnpr	1.3894e-24	0.271921	0.415	0.142	2.28056e-20	4	hnrnpr
hspa9	1.55811e-24	0.302791	0.585	0.24	2.55748e-20	4	hspa9
trmt112	2.08805e-24	0.249222	0.372	0.117	3.42732e-20	4	trmt112
usp1	2.08942e-24	0.175511	0.203	0.043	3.42958e-20	4	usp1
rrs1	2.84187e-24	0.23952	0.261	0.067	4.66465e-20	4	rrs1
tsr21	2.93901e-24	0.286145	0.459	0.167	4.82409e-20	4	tsr2
usp10	3.0538e-24	0.224618	0.425	0.143	5.01251e-20	4	usp10
tcp11	3.42934e-24	0.348285	0.792	0.403	5.62892e-20	4	tcp1
ndufa12	4.47196e-24	0.239517	0.42	0.143	7.34027e-20	4	ndufa12
rrp9	4.56203e-24	0.142475	0.164	0.029	7.48812e-20	4	rrp9
gmpr21	4.58611e-24	0.400132	0.85	0.481	7.52764e-20	4	gmpr2
ndufv2	4.74362e-24	0.253069	0.396	0.132	7.78617e-20	4	ndufv2
sf3b5	5.43449e-24	0.228733	0.324	0.095	8.92018e-20	4	sf3b5
atp5f1b	7.20619e-24	0.373954	0.971	0.756	1.18282e-19	4	atp5f1b
fam207a1	7.21686e-24	0.30067	0.411	0.146	1.18458e-19	4	fam207a
aldh7a1	8.67269e-24	0.267944	0.43	0.151	1.42354e-19	4	aldh7a1
hypk1	9.66062e-24	0.272403	0.599	0.247	1.58569e-19	4	hypk
atp5mc3a1	1.13573e-23	0.353043	0.87	0.483	1.86418e-19	4	atp5mc3a
fkbp4	1.56728e-23	0.213549	0.271	0.072	2.57254e-19	4	fkbp4
arhgdia	1.66123e-23	0.25474	0.507	0.193	2.72674e-19	4	arhgdia
slc20a1b	1.89577e-23	0.247059	0.304	0.088	3.11172e-19	4	slc20a1b
rer1	1.89665e-23	0.206345	0.309	0.089	3.11316e-19	4	rer1
cpn1.11	1.92207e-23	0.259757	0.367	0.12	3.15489e-19	4	cpn1.1
acp1	2.0274e-23	0.154923	0.188	0.039	3.32777e-19	4	acp1
eif3ba1	2.06117e-23	0.346097	0.778	0.409	3.38321e-19	4	eif3ba
cox7a2a1	2.44822e-23	0.276579	0.599	0.248	4.01851e-19	4	cox7a2a
ube2nb1	2.47897e-23	0.309389	0.522	0.209	4.06898e-19	4	ube2nb
polr2eb	2.61701e-23	0.235644	0.357	0.114	4.29556e-19	4	polr2eb
smc1al	3.24101e-23	0.287258	0.469	0.177	5.3198e-19	4	smc1al
pms1	3.40445e-23	0.107004	0.14	0.023	5.58807e-19	4	pms1
srsf11	3.53009e-23	0.238745	0.43	0.152	5.79429e-19	4	srsf11
rida	4.2449e-23	0.189339	0.222	0.052	6.96758e-19	4	rida
ndufb5	4.92862e-23	0.287297	0.71	0.324	8.08984e-19	4	ndufb5
pdha1a	8.07987e-23	0.24273	0.478	0.179	1.32623e-18	4	pdha1a
prps1a1	8.27404e-23	0.356797	0.802	0.428	1.3581e-18	4	prps1a
gcat	9.77501e-23	0.196052	0.213	0.05	1.60447e-18	4	gcat
hmgn21	9.92917e-23	0.37696	0.792	0.446	1.62977e-18	4	hmgn2
prdx21	1.07835e-22	0.385855	0.899	0.542	1.77e-18	4	prdx2
hirip3	1.12926e-22	0.186688	0.155	0.028	1.85356e-18	4	hirip3
ncl1	1.39311e-22	0.398963	0.942	0.612	2.28665e-18	4	ncl
zgc:112496	1.52901e-22	0.178103	0.256	0.069	2.50972e-18	4	zgc:112496
wdr43	1.62448e-22	0.240094	0.372	0.125	2.66642e-18	4	wdr43
cnbpa1	1.945e-22	0.347955	0.879	0.496	3.19252e-18	4	cnbpa
tufm	2.21344e-22	0.248459	0.367	0.123	3.63314e-18	4	tufm
idh3b	2.27261e-22	0.216213	0.319	0.097	3.73026e-18	4	idh3b
xirp2a1	2.91409e-22	0.225129	0.396	0.143	4.78319e-18	4	xirp2a
mrpl27	3.24044e-22	0.149751	0.169	0.033	5.31886e-18	4	mrpl27
srsf6b	3.32923e-22	0.211496	0.401	0.138	5.46459e-18	4	srsf6b
sf3b4	3.56329e-22	0.137446	0.155	0.028	5.84879e-18	4	sf3b4
atic	3.60743e-22	0.160889	0.15	0.027	5.92124e-18	4	atic
lyar	4.3239e-22	0.189523	0.193	0.043	7.09725e-18	4	lyar
utp31	4.70001e-22	0.249056	0.367	0.124	7.7146e-18	4	utp3
polr2l	4.78952e-22	0.259822	0.498	0.197	7.86152e-18	4	polr2l
anapc5	5.63238e-22	0.210928	0.242	0.065	9.24499e-18	4	anapc5
acat11	8.03173e-22	0.221708	0.382	0.13	1.31833e-17	4	acat1
prelid1a	8.17348e-22	0.222693	0.319	0.1	1.3416e-17	4	prelid1a
acp61	9.76944e-22	0.227241	0.517	0.219	1.60356e-17	4	acp6
pabpn1	1.01957e-21	0.318828	0.778	0.398	1.67353e-17	4	pabpn1
rad9a	1.14124e-21	0.112852	0.145	0.026	1.87323e-17	4	rad9a
asf1bb	1.25172e-21	0.169222	0.15	0.028	2.05457e-17	4	asf1bb
psma3	1.25429e-21	0.24413	0.512	0.205	2.05879e-17	4	psma3
psmd7	1.50208e-21	0.209598	0.367	0.122	2.46551e-17	4	psmd7
uqcr101	1.71695e-21	0.303582	0.512	0.205	2.81821e-17	4	uqcr10
khdrbs1a	2.21149e-21	0.40718	0.884	0.538	3.62994e-17	4	khdrbs1a
mrpl54	2.48852e-21	0.250261	0.464	0.179	4.08466e-17	4	mrpl54
atp5if1a1	2.51598e-21	0.354668	0.662	0.312	4.12973e-17	4	atp5if1a
atp5md	2.83576e-21	0.306396	0.623	0.284	4.65461e-17	4	atp5md
rpl7l1	2.90122e-21	0.222301	0.362	0.123	4.76206e-17	4	rpl7l1
bckdha	3.12812e-21	0.218359	0.324	0.103	5.1345e-17	4	bckdha
timp2a1	3.20892e-21	0.372683	0.923	0.607	5.26711e-17	4	timp2a
ptbp31	3.93803e-21	0.324533	0.749	0.444	6.46388e-17	4	ptbp3
mrpl13	3.99078e-21	0.155091	0.217	0.053	6.55047e-17	4	mrpl13
rbl1	4.16427e-21	0.133522	0.179	0.039	6.83523e-17	4	rbl1
rpia	5.07084e-21	0.213316	0.28	0.083	8.32328e-17	4	rpia
gfpt11	5.75387e-21	0.177372	0.256	0.073	9.44441e-17	4	gfpt1
snrpa1	8.41982e-21	0.187437	0.246	0.067	1.38203e-16	4	snrpa1
ruvbl1	8.88363e-21	0.154723	0.169	0.035	1.45816e-16	4	ruvbl1
kars	8.9785e-21	0.233494	0.473	0.185	1.47373e-16	4	kars
canx	9.18632e-21	0.231487	0.411	0.151	1.50784e-16	4	canx
nme31	9.33244e-21	0.215355	0.309	0.098	1.53183e-16	4	nme3
CABZ01115113.1	1.07809e-20	0.164475	0.232	0.06	1.76957e-16	4	CABZ01115113.1
denr	1.2109e-20	0.28002	0.469	0.192	1.98757e-16	4	denr
mif	1.80499e-20	0.254899	0.556	0.24	2.96271e-16	4	mif
timeless	1.95442e-20	0.139581	0.14	0.026	3.20799e-16	4	timeless
nop16	2.54747e-20	0.203533	0.304	0.095	4.18141e-16	4	nop16
tspan18a1	2.76364e-20	0.276308	0.585	0.28	4.53623e-16	4	tspan18a
aars	2.89382e-20	0.153337	0.217	0.055	4.74992e-16	4	aars
chchd6b1	3.76036e-20	0.262135	0.556	0.243	6.17226e-16	4	chchd6b
ndufab1b	3.76736e-20	0.252172	0.531	0.224	6.18374e-16	4	ndufab1b
cox8a	3.82828e-20	0.321496	0.937	0.699	6.28374e-16	4	cox8a
nasp	5.51994e-20	0.28056	0.169	0.036	9.06043e-16	4	nasp
sumo3a	6.49477e-20	0.286901	0.638	0.291	1.06605e-15	4	sumo3a
pes	6.67315e-20	0.208111	0.329	0.109	1.09533e-15	4	pes
magoh	7.31001e-20	0.226872	0.454	0.177	1.19987e-15	4	magoh
g3bp1	7.66112e-20	0.231433	0.28	0.085	1.2575e-15	4	g3bp1
nutf2	8.58554e-20	0.197194	0.222	0.059	1.40923e-15	4	nutf2
ran1	9.33818e-20	0.330828	0.966	0.734	1.53277e-15	4	ran
phax	1.00915e-19	0.144234	0.164	0.035	1.65642e-15	4	phax
cmah1	1.06499e-19	0.265019	0.459	0.197	1.74807e-15	4	cmah
hnrnpaba	1.17397e-19	0.305146	0.787	0.399	1.92696e-15	4	hnrnpaba
hpf1	1.22598e-19	0.150719	0.155	0.031	2.01233e-15	4	hpf1
pdap1a	1.60813e-19	0.175607	0.222	0.059	2.63959e-15	4	pdap1a
h2afva	1.66183e-19	0.251004	0.242	0.068	2.72772e-15	4	h2afva
pacsin21	1.78287e-19	0.21079	0.386	0.141	2.9264e-15	4	pacsin2
pprc1	1.90125e-19	0.140801	0.155	0.031	3.1207e-15	4	pprc1
pole3	2.53241e-19	0.175108	0.198	0.05	4.15671e-15	4	pole3
slc6a11a	2.60742e-19	0.125059	0.145	0.029	4.27981e-15	4	slc6a11a
naa40.1	3.37506e-19	0.179259	0.208	0.054	5.53982e-15	4	naa40.1
gar1	3.64783e-19	0.174932	0.246	0.07	5.98755e-15	4	gar1
pold2	3.79841e-19	0.12209	0.145	0.029	6.23471e-15	4	pold2
myg1	3.83207e-19	0.160052	0.217	0.058	6.28995e-15	4	myg1
mt-nd42	3.931e-19	0.242529	1	0.967	6.45234e-15	4	mt-nd4
polr3h	4.04267e-19	0.169096	0.271	0.082	6.63564e-15	4	polr3h
spcs1	4.85623e-19	0.228957	0.478	0.198	7.97102e-15	4	spcs1
pin1	5.00765e-19	0.224747	0.44	0.174	8.21955e-15	4	pin1
ndufs4	5.14989e-19	0.220146	0.372	0.136	8.45303e-15	4	ndufs4
slbp	5.482e-19	0.153644	0.092	0.012	8.99816e-15	4	slbp
s100u1	5.56922e-19	0.265198	0.623	0.308	9.14133e-15	4	s100u
srsf7a1	5.57273e-19	0.265024	0.473	0.193	9.14708e-15	4	srsf7a
ndufab1a	5.83148e-19	0.27725	0.502	0.217	9.57179e-15	4	ndufab1a
si:dkey-6n6.2	6.06067e-19	0.102298	0.14	0.027	9.94799e-15	4	si:dkey-6n6.2
ndufa10	6.39735e-19	0.170863	0.314	0.103	1.05006e-14	4	ndufa10
ywhaqb	6.49207e-19	0.30007	0.816	0.454	1.06561e-14	4	ywhaqb
ptges3a	9.30179e-19	0.227208	0.42	0.174	1.5268e-14	4	ptges3a
ndufs5	1.07183e-18	0.211683	0.473	0.192	1.7593e-14	4	ndufs5
chek1	1.09391e-18	0.106768	0.126	0.023	1.79554e-14	4	chek1
ndufc2	1.1361e-18	0.212958	0.614	0.274	1.8648e-14	4	ndufc2
rpf2	1.23992e-18	0.214617	0.333	0.117	2.03521e-14	4	rpf2
mt-nd31	1.38731e-18	0.329131	0.802	0.466	2.27713e-14	4	mt-nd3
mapk12a1	1.41104e-18	0.214073	0.343	0.127	2.31607e-14	4	mapk12a
adkb	1.51254e-18	0.186511	0.275	0.086	2.48268e-14	4	adkb
lsm4	1.51457e-18	0.217908	0.512	0.218	2.48601e-14	4	lsm4
bzw1b1	1.58058e-18	0.317977	0.739	0.368	2.59436e-14	4	bzw1b
cox14	1.60176e-18	0.162057	0.222	0.061	2.62913e-14	4	cox14
tomm40	1.61253e-18	0.180831	0.217	0.059	2.64681e-14	4	tomm40
slc25a28	1.81747e-18	0.170685	0.251	0.075	2.9832e-14	4	slc25a28
eif3ja	2.15795e-18	0.183222	0.338	0.118	3.54206e-14	4	eif3ja
pbdc11	2.68111e-18	0.216604	0.531	0.228	4.40078e-14	4	pbdc1
psmb3	3.29627e-18	0.224548	0.435	0.173	5.4105e-14	4	psmb3
zgc:1584231	3.69091e-18	0.34393	0.377	0.154	6.05826e-14	4	zgc:158423
ddx51	5.53897e-18	0.255718	0.623	0.289	9.09167e-14	4	ddx5
cct6a1	6.23374e-18	0.250928	0.763	0.395	1.02321e-13	4	cct6a
ebna1bp2	6.38064e-18	0.172301	0.309	0.104	1.04732e-13	4	ebna1bp2
pin4	7.1587e-18	0.166456	0.217	0.061	1.17503e-13	4	pin4
cbx3a	7.50856e-18	0.270747	0.754	0.384	1.23246e-13	4	cbx3a
nhp2	7.59215e-18	0.244789	0.372	0.144	1.24618e-13	4	nhp2
ap2m1a	8.07422e-18	0.250713	0.599	0.287	1.3253e-13	4	ap2m1a
mrpl4	8.51497e-18	0.161609	0.208	0.057	1.39765e-13	4	mrpl4
mrpl321	9.35584e-18	0.192725	0.338	0.121	1.53567e-13	4	mrpl32
xrcc4	9.6432e-18	0.121949	0.159	0.036	1.58284e-13	4	xrcc4
ndufs2	1.0499e-17	0.241	0.425	0.175	1.7233e-13	4	ndufs2
rbm4.31	1.06325e-17	0.249128	0.585	0.265	1.74522e-13	4	rbm4.3
chchd2	1.11916e-17	0.151228	0.242	0.071	1.83699e-13	4	chchd2
hnrnpa0l.11	1.19092e-17	0.366007	0.894	0.579	1.95478e-13	4	hnrnpa0l.1
uqcrfs1	1.25338e-17	0.246769	0.729	0.364	2.0573e-13	4	uqcrfs1
timm23a	1.43471e-17	0.178763	0.329	0.115	2.35494e-13	4	timm23a
polr2f	1.467e-17	0.167846	0.3	0.101	2.40794e-13	4	polr2f
sf3a2	1.53518e-17	0.177393	0.343	0.123	2.51984e-13	4	sf3a2
ndufs3	1.54543e-17	0.194038	0.391	0.151	2.53667e-13	4	ndufs3
smarca5	1.61973e-17	0.119105	0.111	0.019	2.65862e-13	4	smarca5
basp11	1.67792e-17	0.247668	0.768	0.414	2.75415e-13	4	basp1
sars	1.82699e-17	0.17736	0.246	0.075	2.99883e-13	4	sars
nip7	1.97064e-17	0.159407	0.213	0.059	3.23461e-13	4	nip7
mrpl361	1.97138e-17	0.254253	0.551	0.254	3.23582e-13	4	mrpl36
glrx3	2.1751e-17	0.179197	0.275	0.09	3.5702e-13	4	glrx3
eef2b1	2.2358e-17	0.237748	0.99	0.956	3.66984e-13	4	eef2b
lin37	2.37034e-17	0.149639	0.232	0.07	3.89068e-13	4	lin37
pnp5a1	2.41393e-17	0.355891	0.884	0.606	3.96223e-13	4	pnp5a
ddost	2.4419e-17	0.18079	0.256	0.08	4.00814e-13	4	ddost
znf593	2.51042e-17	0.147623	0.193	0.051	4.12061e-13	4	znf593
si:ch211-156j16.1	2.68955e-17	0.245903	0.691	0.341	4.41463e-13	4	si:ch211-156j16.1
psma6a	2.75025e-17	0.159374	0.198	0.053	4.51426e-13	4	psma6a
si:rp71-45k5.4	3.24194e-17	0.169531	0.333	0.119	5.32131e-13	4	si:rp71-45k5.4
gpatch4	3.93516e-17	0.151924	0.184	0.047	6.45917e-13	4	gpatch4
jpt2	4.08115e-17	0.188869	0.449	0.184	6.6988e-13	4	jpt2
hdac1	4.3282e-17	0.244178	0.517	0.229	7.10431e-13	4	hdac1
emc6	5.46285e-17	0.207062	0.386	0.152	8.96672e-13	4	emc6
sap18	5.53284e-17	0.211803	0.415	0.17	9.0816e-13	4	sap18
hnrnpub	6.63799e-17	0.210828	0.362	0.139	1.08956e-12	4	hnrnpub
srsf3b	7.17959e-17	0.234752	0.517	0.233	1.17846e-12	4	srsf3b
mfge8b1	7.72773e-17	0.283295	0.831	0.496	1.26843e-12	4	mfge8b
mych1	8.22195e-17	0.203705	0.319	0.115	1.34955e-12	4	mych
si:ch73-193i22.11	8.45836e-17	0.23108	0.58	0.289	1.38836e-12	4	si:ch73-193i22.1
gmfb	8.65689e-17	0.222721	0.435	0.181	1.42094e-12	4	gmfb
aldh6a11	8.90249e-17	0.214059	0.57	0.261	1.46126e-12	4	aldh6a1
AK6	8.9288e-17	0.174462	0.227	0.068	1.46557e-12	4	AK6
kcnj19b1	9.59806e-17	0.187992	0.324	0.123	1.57543e-12	4	kcnj19b
smc3	9.84402e-17	0.14618	0.208	0.058	1.6158e-12	4	smc3
ndufa3	1.00748e-16	0.226076	0.454	0.194	1.65367e-12	4	ndufa3
sf3b3	1.01528e-16	0.148863	0.179	0.046	1.66648e-12	4	sf3b3
rwdd11	1.02807e-16	0.224012	0.411	0.17	1.68747e-12	4	rwdd1
dnajc8	1.04497e-16	0.171552	0.237	0.073	1.71521e-12	4	dnajc8
atp5l1	1.06193e-16	0.327901	0.908	0.605	1.74306e-12	4	atp5l
ndufa8	1.22196e-16	0.235912	0.604	0.294	2.00572e-12	4	ndufa8
spon1b1	1.2267e-16	0.184814	0.372	0.152	2.0135e-12	4	spon1b
atp5mf	1.30359e-16	0.25225	0.671	0.325	2.13971e-12	4	atp5mf
txn2	1.35229e-16	0.190327	0.396	0.158	2.21965e-12	4	txn2
gnl3	1.35308e-16	0.192644	0.333	0.127	2.22095e-12	4	gnl3
cct2.11	1.59179e-16	0.25053	0.749	0.394	2.61276e-12	4	cct2.1
eif4a3	1.70925e-16	0.208979	0.527	0.239	2.80556e-12	4	eif4a3
snrpd3l	1.78339e-16	0.192421	0.353	0.134	2.92726e-12	4	snrpd3l
psmg1	1.9226e-16	0.187511	0.271	0.091	3.15575e-12	4	psmg1
rdh8a1	2.04207e-16	0.214891	0.575	0.287	3.35185e-12	4	rdh8a
pold3	2.16871e-16	0.148304	0.203	0.059	3.55972e-12	4	pold3
slc7a111	2.29253e-16	0.268935	0.739	0.44	3.76296e-12	4	slc7a11
serpine11	2.32289e-16	0.464801	0.56	0.289	3.8128e-12	4	serpine1
pfdn6	2.385e-16	0.185032	0.271	0.092	3.91474e-12	4	pfdn6
eif1axb	2.45637e-16	0.22149	0.551	0.259	4.03189e-12	4	eif1axb
fubp1	2.50606e-16	0.195098	0.382	0.152	4.11344e-12	4	fubp1
ndufb10	2.63652e-16	0.214379	0.56	0.262	4.32759e-12	4	ndufb10
mrps34	2.9229e-16	0.145191	0.179	0.047	4.79764e-12	4	mrps34
prdx61	3.24394e-16	0.250582	0.652	0.327	5.3246e-12	4	prdx6
si:ch211-198a12.6	3.61339e-16	0.171953	0.266	0.089	5.93101e-12	4	si:ch211-198a12.6
ndufb2	4.01146e-16	0.2151	0.589	0.28	6.58442e-12	4	ndufb2
mibp21	4.67692e-16	0.326473	0.903	0.637	7.6767e-12	4	mibp2
psma4	4.94812e-16	0.205126	0.449	0.196	8.12184e-12	4	psma4
nop2	5.00456e-16	0.23133	0.483	0.23	8.21449e-12	4	nop2
pphln1	5.41609e-16	0.127365	0.164	0.041	8.88996e-12	4	pphln1
cse1l	5.66157e-16	0.120824	0.135	0.029	9.29291e-12	4	cse1l
rbmx	5.84506e-16	0.211923	0.454	0.197	9.59408e-12	4	rbmx
eif1axa	6.13666e-16	0.178586	0.246	0.08	1.00727e-11	4	eif1axa
anp32e	6.41052e-16	0.154507	0.266	0.088	1.05222e-11	4	anp32e
ccdc25	6.73124e-16	0.202348	0.435	0.201	1.10487e-11	4	ccdc25
colec112	7.17183e-16	0.324666	0.899	0.619	1.17718e-11	4	colec11
ndufb3	7.36129e-16	0.209006	0.401	0.165	1.20828e-11	4	ndufb3
rpsa1	7.39288e-16	0.175677	1	0.998	1.21347e-11	4	rpsa
tardbp	7.56984e-16	0.193121	0.329	0.125	1.24251e-11	4	tardbp
nsmce2	7.57325e-16	0.112955	0.164	0.042	1.24307e-11	4	nsmce2
gadd45gip1	7.59078e-16	0.182646	0.256	0.085	1.24595e-11	4	gadd45gip1
psmd11a	7.83817e-16	0.114193	0.159	0.039	1.28656e-11	4	psmd11a
nup58	8.51941e-16	0.122309	0.179	0.047	1.39838e-11	4	nup58
tcf121	8.79209e-16	0.265052	0.71	0.387	1.44313e-11	4	tcf12
cox6a11	9.70299e-16	0.313491	0.855	0.537	1.59265e-11	4	cox6a1
prkag2a1	9.77065e-16	0.21798	0.391	0.162	1.60375e-11	4	prkag2a
atf4a1	1.04966e-15	0.304293	0.821	0.491	1.72292e-11	4	atf4a
pfdn41	1.08918e-15	0.158324	0.353	0.135	1.78778e-11	4	pfdn4
hspa5	1.11989e-15	0.328582	0.377	0.157	1.83818e-11	4	hspa5
rab5if	1.18561e-15	0.143883	0.203	0.059	1.94606e-11	4	rab5if
pdcd11	1.19586e-15	0.181449	0.266	0.091	1.96288e-11	4	pdcd11
dctpp1	1.25602e-15	0.113757	0.101	0.018	2.06163e-11	4	dctpp1
lsm6	1.32677e-15	0.20411	0.338	0.133	2.17775e-11	4	lsm6
lsm3	1.49025e-15	0.176728	0.271	0.093	2.44609e-11	4	lsm3
dag11	1.5237e-15	0.244282	0.995	0.898	2.50099e-11	4	dag1
zgc:63882	1.56535e-15	0.183754	0.362	0.15	2.56936e-11	4	zgc:63882
uqcrc2a1	1.64452e-15	0.177554	0.295	0.106	2.69932e-11	4	uqcrc2a
slirp	1.75691e-15	0.154258	0.188	0.053	2.8838e-11	4	slirp
timm10	1.79405e-15	0.145932	0.174	0.046	2.94476e-11	4	timm10
siva1	2.05911e-15	0.155505	0.184	0.049	3.37981e-11	4	siva1
rpn1	2.19121e-15	0.189802	0.357	0.141	3.59666e-11	4	rpn1
bccip1	2.31319e-15	0.209388	0.686	0.345	3.79687e-11	4	bccip
eif3k1	2.34204e-15	0.217794	0.758	0.397	3.84422e-11	4	eif3k
ndufs7	2.4585e-15	0.190711	0.58	0.275	4.03539e-11	4	ndufs7
smarcc1a	2.62451e-15	0.137835	0.155	0.038	4.30787e-11	4	smarcc1a
sod2	2.66198e-15	0.18919	0.377	0.153	4.36937e-11	4	sod2
hmgn7	2.83955e-15	0.271414	0.894	0.601	4.66084e-11	4	hmgn7
naa50	2.87774e-15	0.187959	0.275	0.098	4.72352e-11	4	naa50
eprs	2.9658e-15	0.160382	0.329	0.131	4.86806e-11	4	eprs
mtap	2.9712e-15	0.140381	0.295	0.105	4.87693e-11	4	mtap
mtpn1	2.97755e-15	0.20983	0.367	0.151	4.88735e-11	4	mtpn
rad21a	3.26847e-15	0.193471	0.507	0.233	5.36487e-11	4	rad21a
khdrbs1b	3.27008e-15	0.182736	0.343	0.134	5.36752e-11	4	khdrbs1b
nucks1a	3.34776e-15	0.196855	0.609	0.296	5.49501e-11	4	nucks1a
polr2b1	3.37686e-15	0.206801	0.386	0.162	5.54278e-11	4	polr2b
hsd3b11	3.57704e-15	0.195749	0.343	0.141	5.87135e-11	4	hsd3b1
atp1a3a1	3.73766e-15	0.188026	0.266	0.096	6.135e-11	4	atp1a3a
kpnb1	3.91626e-15	0.158992	0.285	0.101	6.42815e-11	4	kpnb1
angptl41	4.5194e-15	0.340456	0.903	0.669	7.41815e-11	4	angptl4
rbbp91	4.69116e-15	0.161301	0.357	0.141	7.70007e-11	4	rbbp9
hsdl2	4.76882e-15	0.148595	0.232	0.074	7.82754e-11	4	hsdl2
pfdn2	4.91046e-15	0.163344	0.237	0.077	8.06003e-11	4	pfdn2
fh	5.10527e-15	0.173206	0.227	0.073	8.37979e-11	4	fh
drg21	5.12712e-15	0.171224	0.275	0.098	8.41565e-11	4	drg2
cyc1	5.2101e-15	0.197527	0.618	0.302	8.55185e-11	4	cyc1
ndufs6	6.11655e-15	0.17993	0.382	0.157	1.00397e-10	4	ndufs6
tomm6	6.46314e-15	0.157301	0.285	0.102	1.06086e-10	4	tomm6
sap30l	6.82738e-15	0.249421	0.444	0.206	1.12065e-10	4	sap30l
zgc:163080	7.01557e-15	0.165012	0.251	0.085	1.15154e-10	4	zgc:163080
ndufv1	7.19701e-15	0.158229	0.309	0.115	1.18132e-10	4	ndufv1
eif4g1a	7.70749e-15	0.184685	0.522	0.241	1.26511e-10	4	eif4g1a
kmt5aa	7.7331e-15	0.194153	0.362	0.15	1.26931e-10	4	kmt5aa
dnttip2	7.79307e-15	0.141612	0.203	0.06	1.27916e-10	4	dnttip2
aco2	7.81746e-15	0.167053	0.271	0.095	1.28316e-10	4	aco2
mrps25	8.38986e-15	0.146401	0.246	0.082	1.37711e-10	4	mrps25
calr3b	9.27099e-15	0.18357	0.295	0.114	1.52174e-10	4	calr3b
CU694197.1	1.02712e-14	0.176571	0.382	0.159	1.68592e-10	4	CU694197.1
pgd	1.07495e-14	0.220196	0.512	0.251	1.76443e-10	4	pgd
gtf2f1	1.28644e-14	0.149145	0.217	0.069	2.11157e-10	4	gtf2f1
mrps36	1.34754e-14	0.189526	0.435	0.19	2.21185e-10	4	mrps36
coa6	1.35876e-14	0.156306	0.242	0.081	2.23027e-10	4	coa6
polr3f	1.43612e-14	0.100694	0.126	0.028	2.35724e-10	4	polr3f
wsb11	1.4534e-14	0.207725	0.527	0.25	2.38562e-10	4	wsb1
cldn7b2	1.46602e-14	0.168057	0.29	0.107	2.40633e-10	4	cldn7b
glrx51	1.74852e-14	0.200364	0.43	0.193	2.87002e-10	4	glrx5
mrpl2	1.90439e-14	0.158162	0.227	0.074	3.12587e-10	4	mrpl2
ndufa5	1.94361e-14	0.172657	0.396	0.168	3.19024e-10	4	ndufa5
mrpl38	2.13829e-14	0.163073	0.319	0.122	3.50979e-10	4	mrpl38
psmg31	2.22776e-14	0.183268	0.396	0.171	3.65664e-10	4	psmg3
exosc3	2.3271e-14	0.142501	0.232	0.076	3.8197e-10	4	exosc3
ost4	2.36498e-14	0.207829	0.348	0.144	3.88188e-10	4	ost4
mrps16	2.40917e-14	0.13591	0.217	0.069	3.95442e-10	4	mrps16
uchl3	2.48326e-14	0.125322	0.188	0.056	4.07603e-10	4	uchl3
rrp8	2.56807e-14	0.159714	0.232	0.077	4.21523e-10	4	rrp8
si:dkey-16p21.81	2.62536e-14	0.177561	0.266	0.096	4.30926e-10	4	si:dkey-16p21.8
hist2h2l2	2.65615e-14	0.217414	0.594	0.296	4.35981e-10	4	hist2h2l
dbi	2.66341e-14	0.193743	0.522	0.245	4.37172e-10	4	dbi
tpm31	2.73719e-14	0.208918	0.686	0.36	4.49283e-10	4	tpm3
ddx39aa	2.8327e-14	0.188572	0.314	0.123	4.64959e-10	4	ddx39aa
fam53b	2.83292e-14	0.128596	0.155	0.041	4.64995e-10	4	fam53b
mdh1aa1	3.06857e-14	0.223046	0.633	0.322	5.03675e-10	4	mdh1aa
mpc2	3.075e-14	0.185419	0.546	0.26	5.04731e-10	4	mpc2
ndufb7	3.11175e-14	0.167178	0.57	0.269	5.10762e-10	4	ndufb7
supt4h1	3.13873e-14	0.161446	0.28	0.103	5.15191e-10	4	supt4h1
hsp90ab11	3.31162e-14	0.170348	1	0.999	5.43569e-10	4	hsp90ab1
polr1d	3.45463e-14	0.109702	0.135	0.032	5.67043e-10	4	polr1d
pnp4a2	3.51707e-14	0.330349	0.976	0.856	5.77292e-10	4	pnp4a
rrp12	3.69093e-14	0.118317	0.188	0.056	6.05829e-10	4	rrp12
nol11	3.70437e-14	0.11351	0.15	0.038	6.08036e-10	4	nol11
prpf38b	3.98426e-14	0.143828	0.266	0.094	6.53977e-10	4	prpf38b
si:dkey-84k17.2	4.00496e-14	0.118358	0.169	0.048	6.57375e-10	4	si:dkey-84k17.2
st131	4.48154e-14	0.180309	0.372	0.158	7.35599e-10	4	st13
nup50	4.58868e-14	0.125322	0.155	0.041	7.53186e-10	4	nup50
mrps6	4.61263e-14	0.18076	0.377	0.159	7.57117e-10	4	mrps6
ndufb9	4.75487e-14	0.201298	0.652	0.339	7.80464e-10	4	ndufb9
cluha	5.07794e-14	0.125859	0.15	0.039	8.33492e-10	4	cluha
ndufa11	6.08237e-14	0.164763	0.353	0.144	9.98361e-10	4	ndufa11
c19h1orf109	6.12643e-14	0.15178	0.203	0.065	1.00559e-09	4	c19h1orf109
sytl2b1	6.32704e-14	0.128353	0.203	0.064	1.03852e-09	4	sytl2b
eif4bb	6.60788e-14	0.18302	0.309	0.122	1.08462e-09	4	eif4bb
ndufb8	6.72264e-14	0.243884	0.85	0.527	1.10345e-09	4	ndufb8
cfl11	6.76857e-14	0.244638	0.957	0.827	1.11099e-09	4	cfl1
slc5a6b1	6.87118e-14	0.157548	0.28	0.108	1.12784e-09	4	slc5a6b
men1	7.0582e-14	0.110972	0.101	0.02	1.15853e-09	4	men1
pam16	7.3159e-14	0.178298	0.261	0.095	1.20083e-09	4	pam16
mrps24	7.63043e-14	0.143991	0.164	0.046	1.25246e-09	4	mrps24
med28	8.04147e-14	0.15672	0.29	0.11	1.31993e-09	4	med28
pfdn1	8.25232e-14	0.164396	0.256	0.093	1.35454e-09	4	pfdn1
atp5pd1	8.43485e-14	0.276707	0.889	0.61	1.3845e-09	4	atp5pd
u2af1	8.52641e-14	0.205123	0.386	0.172	1.39952e-09	4	u2af1
nolc1	9.24843e-14	0.187891	0.367	0.156	1.51804e-09	4	nolc1
xrcc5	9.26095e-14	0.129345	0.203	0.065	1.52009e-09	4	xrcc5
si:dkey-95p16.2	9.96824e-14	0.159243	0.271	0.104	1.63619e-09	4	si:dkey-95p16.2
ranbp3b	9.97835e-14	0.146421	0.213	0.069	1.63785e-09	4	ranbp3b
nucks1b	1.02697e-13	0.190514	0.618	0.315	1.68567e-09	4	nucks1b
nop561	1.07158e-13	0.236861	0.754	0.425	1.75889e-09	4	nop56
hint1	1.09373e-13	0.208287	0.662	0.355	1.79525e-09	4	hint1
coa3a	1.11264e-13	0.132216	0.232	0.078	1.82628e-09	4	coa3a
mt-cyb1	1.38503e-13	0.127455	1	1	2.27339e-09	4	mt-cyb
selenot1a	1.42125e-13	0.157514	0.372	0.158	2.33284e-09	4	selenot1a
eif2s1a	1.53376e-13	0.154494	0.246	0.089	2.51751e-09	4	eif2s1a
rbp52	1.72466e-13	0.268486	0.754	0.44	2.83086e-09	4	rbp5
lfng1	1.77308e-13	0.247628	0.3	0.125	2.91033e-09	4	lfng
fkbp2	1.80502e-13	0.177092	0.391	0.17	2.96277e-09	4	fkbp2
gpia	1.84119e-13	0.178781	0.44	0.2	3.02213e-09	4	gpia
mrpl44	1.84542e-13	0.13118	0.188	0.058	3.02907e-09	4	mrpl44
mrps11	1.86432e-13	0.156116	0.246	0.088	3.0601e-09	4	mrps11
sec11a	1.91663e-13	0.15756	0.377	0.161	3.14595e-09	4	sec11a
mphosph10	1.94458e-13	0.13657	0.15	0.04	3.19183e-09	4	mphosph10
mak16	2.0259e-13	0.138935	0.237	0.082	3.32532e-09	4	mak16
timm8a	2.09465e-13	0.13982	0.179	0.053	3.43815e-09	4	timm8a
adsl	2.12528e-13	0.137931	0.155	0.043	3.48843e-09	4	adsl
cox7c	2.15027e-13	0.247018	0.826	0.495	3.52946e-09	4	cox7c
cdc5l	2.20629e-13	0.109778	0.188	0.057	3.62141e-09	4	cdc5l
mrpl18	2.26694e-13	0.149903	0.242	0.085	3.72095e-09	4	mrpl18
trappc11	2.36831e-13	0.170015	0.28	0.108	3.88734e-09	4	trappc1
immt	2.44253e-13	0.142646	0.227	0.077	4.00917e-09	4	immt
ythdf2	2.49548e-13	0.117795	0.15	0.04	4.09608e-09	4	ythdf2
etf1b1	2.59762e-13	0.207101	0.657	0.348	4.26373e-09	4	etf1b
tcea1	2.61948e-13	0.133395	0.246	0.087	4.29961e-09	4	tcea1
ostc	2.66789e-13	0.185712	0.357	0.153	4.37907e-09	4	ostc
elavl1a	2.68429e-13	0.128108	0.222	0.075	4.40599e-09	4	elavl1a
larp4ab	2.69493e-13	0.234239	0.493	0.253	4.42346e-09	4	larp4ab
mrps26	2.86918e-13	0.148695	0.227	0.078	4.70947e-09	4	mrps26
paxip1	3.07957e-13	0.111945	0.179	0.055	5.0548e-09	4	paxip1
hsd17b10	3.11509e-13	0.151094	0.232	0.081	5.11311e-09	4	hsd17b10
tomm40l	3.14848e-13	0.148442	0.256	0.097	5.16792e-09	4	tomm40l
puf60a	3.18521e-13	0.178948	0.333	0.138	5.22821e-09	4	puf60a
dlst1	3.27942e-13	0.191349	0.454	0.214	5.38284e-09	4	dlst
sdhdb	3.5294e-13	0.173554	0.382	0.165	5.79315e-09	4	sdhdb
gtf2f2a1	3.90266e-13	0.146535	0.367	0.156	6.40583e-09	4	gtf2f2a
cnp1	4.41558e-13	0.228397	0.609	0.321	7.24773e-09	4	cnp
nudt21	4.50889e-13	0.111889	0.159	0.045	7.4009e-09	4	nudt21
col28a2b1	4.76132e-13	0.203121	0.454	0.229	7.81522e-09	4	col28a2b
cdv3	4.86444e-13	0.16284	0.372	0.16	7.98449e-09	4	cdv3
eif2s2	4.8874e-13	0.242424	0.633	0.357	8.02219e-09	4	eif2s2
mdc1	5.64615e-13	0.167716	0.3	0.124	9.26759e-09	4	mdc1
bcat21	5.99027e-13	0.169361	0.309	0.126	9.83244e-09	4	bcat2
hnrnph1l	6.16125e-13	0.128118	0.203	0.066	1.01131e-08	4	hnrnph1l
si:zfos-464b6.21	6.61544e-13	0.19961	0.604	0.312	1.08586e-08	4	si:zfos-464b6.2
mars	7.48168e-13	0.109243	0.135	0.035	1.22804e-08	4	mars
rpl41	9.17352e-13	0.260042	0.937	0.751	1.50574e-08	4	rpl4
ifrd1	9.70152e-13	0.144551	0.237	0.085	1.59241e-08	4	ifrd1
mrpl39	1.03333e-12	0.10187	0.116	0.027	1.6961e-08	4	mrpl39
fam13b	1.05831e-12	0.157863	0.589	0.312	1.73712e-08	4	fam13b
mtch2	1.066e-12	0.121756	0.232	0.081	1.74973e-08	4	mtch2
mrpl57	1.18025e-12	0.127254	0.242	0.087	1.93726e-08	4	mrpl57
nup210	1.21316e-12	0.127458	0.208	0.072	1.99128e-08	4	nup210
nono	1.22211e-12	0.160369	0.348	0.149	2.00597e-08	4	nono
si:ch73-217n20.12	1.23737e-12	0.212867	0.681	0.405	2.03103e-08	4	si:ch73-217n20.1
ubap2b	1.27996e-12	0.155696	0.309	0.126	2.10093e-08	4	ubap2b
bcas2	1.28437e-12	0.161516	0.357	0.155	2.10816e-08	4	bcas2
psmb7	1.29273e-12	0.167361	0.28	0.111	2.12188e-08	4	psmb7
psmb1	1.60678e-12	0.163955	0.488	0.236	2.63736e-08	4	psmb1
itga6a1	1.63577e-12	0.161235	0.309	0.133	2.68496e-08	4	itga6a
chd4a	1.64519e-12	0.168904	0.246	0.092	2.70041e-08	4	chd4a
tmem11	1.66421e-12	0.136307	0.261	0.099	2.73164e-08	4	tmem11
eif3s6ip1	1.67538e-12	0.159947	0.502	0.241	2.74997e-08	4	eif3s6ip
chtopb1	1.77549e-12	0.148645	0.251	0.096	2.91429e-08	4	chtopb
si:ch211-282b22.1	1.77825e-12	0.145966	0.256	0.096	2.91882e-08	4	si:ch211-282b22.1
rangap1b	1.8129e-12	0.105802	0.174	0.054	2.97569e-08	4	rangap1b
atp2b1a1	1.91066e-12	0.146031	0.435	0.198	3.13615e-08	4	atp2b1a
eef1b21	2.18107e-12	0.203699	0.986	0.957	3.58001e-08	4	eef1b2
nup62l	2.21604e-12	0.156653	0.29	0.116	3.6374e-08	4	nup62l
uck2a2	2.24047e-12	0.253757	0.952	0.731	3.67751e-08	4	uck2a
vps35	2.33705e-12	0.170368	0.29	0.118	3.83603e-08	4	vps35
rbm8a	2.38382e-12	0.175903	0.696	0.369	3.91281e-08	4	rbm8a
suclg11	2.42733e-12	0.17654	0.391	0.178	3.98421e-08	4	suclg1
dynll2a	2.4803e-12	0.135692	0.179	0.056	4.07117e-08	4	dynll2a
naa15a	2.52594e-12	0.123957	0.198	0.066	4.14607e-08	4	naa15a
sumo2b2	2.54646e-12	0.151483	0.556	0.277	4.17975e-08	4	sumo2b
mrpl43	2.62381e-12	0.153043	0.295	0.124	4.30672e-08	4	mrpl43
cs	2.66333e-12	0.160466	0.295	0.119	4.37159e-08	4	cs
calr3a	2.96176e-12	0.162847	0.338	0.145	4.86143e-08	4	calr3a
timm13	2.9806e-12	0.112227	0.169	0.051	4.89236e-08	4	timm13
rpe	3.19056e-12	0.104433	0.135	0.036	5.23699e-08	4	rpe
uba1	3.29764e-12	0.158099	0.309	0.129	5.41274e-08	4	uba1
mesd	3.41623e-12	0.126325	0.275	0.106	5.6074e-08	4	mesd
chmp2a	3.45761e-12	0.151621	0.3	0.122	5.67533e-08	4	chmp2a
srsf3a	3.5309e-12	0.155304	0.237	0.09	5.79562e-08	4	srsf3a
echs1	3.54345e-12	0.15066	0.329	0.139	5.81623e-08	4	echs1
ppp2r1ba	3.55937e-12	0.159658	0.367	0.163	5.84235e-08	4	ppp2r1ba
rpl5a1	3.58956e-12	0.21703	0.995	0.916	5.89191e-08	4	rpl5a
smarcd1	3.70749e-12	0.115312	0.174	0.054	6.08548e-08	4	smarcd1
rplp2l2	3.74067e-12	0.15469	1	1	6.13994e-08	4	rplp2l
zgc:153115	3.80554e-12	0.131972	0.237	0.09	6.24641e-08	4	zgc:153115
foxo1a1	3.90348e-12	0.207343	0.734	0.426	6.40717e-08	4	foxo1a
smarca4a	3.95951e-12	0.132725	0.155	0.046	6.49913e-08	4	smarca4a
serp11	4.14949e-12	0.211967	0.285	0.116	6.81097e-08	4	serp1
cd3eap	4.60488e-12	0.15925	0.28	0.113	7.55845e-08	4	cd3eap
psmd3	4.81533e-12	0.142496	0.208	0.073	7.90389e-08	4	psmd3
gtf2h5	5.10204e-12	0.120586	0.193	0.064	8.37449e-08	4	gtf2h5
anapc11	5.35151e-12	0.124529	0.208	0.072	8.78397e-08	4	anapc11
FOXK2	5.37032e-12	0.14783	0.29	0.118	8.81485e-08	4	FOXK2
rangap1a	5.39957e-12	0.163739	0.314	0.141	8.86286e-08	4	rangap1a
btf3l41	5.4062e-12	0.176676	0.488	0.243	8.87374e-08	4	btf3l4
trappc5	5.51249e-12	0.139952	0.309	0.13	9.0482e-08	4	trappc5
hey11	5.54728e-12	0.235345	0.454	0.235	9.1053e-08	4	hey1
zc3h15	5.62026e-12	0.151029	0.271	0.108	9.2251e-08	4	zc3h15
mad1l1	5.69669e-12	0.102357	0.155	0.046	9.35054e-08	4	mad1l1
rpl9	5.89465e-12	0.118108	0.222	0.082	9.67547e-08	4	rpl9
psme3	6.07864e-12	0.125207	0.179	0.057	9.97749e-08	4	psme3
usp51	6.12232e-12	0.164821	0.319	0.137	1.00492e-07	4	usp5
msrb1a	6.4109e-12	0.104891	0.174	0.056	1.05229e-07	4	msrb1a
micos10	6.81217e-12	0.140029	0.28	0.112	1.11815e-07	4	micos10
ncln	6.87804e-12	0.108312	0.13	0.035	1.12896e-07	4	ncln
smfn	7.25629e-12	0.140318	0.159	0.049	1.19105e-07	4	smfn
cox7a2l1	7.3332e-12	0.159134	0.493	0.244	1.20367e-07	4	cox7a2l
myclb1	7.46194e-12	0.247835	0.826	0.57	1.2248e-07	4	myclb
eif5a1	7.47999e-12	0.28114	0.812	0.519	1.22777e-07	4	eif5a
psmb2	8.10848e-12	0.178586	0.473	0.235	1.33093e-07	4	psmb2
ndufa4	8.23565e-12	0.126521	0.13	0.036	1.3518e-07	4	ndufa4
calm3a1	8.26804e-12	0.147918	0.696	0.367	1.35712e-07	4	calm3a
zfand5b1	8.56782e-12	0.127483	0.522	0.251	1.40632e-07	4	zfand5b
wu:fc75a091	8.70346e-12	0.21087	0.734	0.458	1.42859e-07	4	wu:fc75a09
uqcrh1	8.906e-12	0.200982	0.807	0.474	1.46183e-07	4	uqcrh
wdr82	9.081e-12	0.120697	0.14	0.039	1.49055e-07	4	wdr82
psmb4	9.21731e-12	0.174585	0.391	0.183	1.51293e-07	4	psmb4
smarce11	9.75956e-12	0.169564	0.362	0.165	1.60193e-07	4	smarce1
rps51	1.02626e-11	0.127499	1	1	1.6845e-07	4	rps5
her15.11	1.03867e-11	0.134388	0.411	0.19	1.70487e-07	4	her15.1
daam1a1	1.06406e-11	0.163995	0.628	0.357	1.74655e-07	4	daam1a
eif2s1b1	1.13721e-11	0.212621	0.715	0.428	1.86662e-07	4	eif2s1b
hspa4b	1.20046e-11	0.124408	0.179	0.059	1.97043e-07	4	hspa4b
si:ch211-217k17.71	1.29268e-11	0.164019	0.42	0.199	2.1218e-07	4	si:ch211-217k17.7
ctbp1	1.41909e-11	0.129916	0.266	0.105	2.3293e-07	4	ctbp1
clta	1.43152e-11	0.142385	0.271	0.108	2.3497e-07	4	clta
prr131	1.45013e-11	0.152521	0.372	0.169	2.38024e-07	4	prr13
mrpl33	1.5657e-11	0.125788	0.271	0.108	2.56995e-07	4	mrpl33
pomp	1.58202e-11	0.15195	0.498	0.248	2.59672e-07	4	pomp
cstf1	1.62218e-11	0.118382	0.164	0.051	2.66265e-07	4	cstf1
si:dkey-239h2.3	1.8201e-11	0.146756	0.198	0.069	2.98751e-07	4	si:dkey-239h2.3
rbm4.2	1.92902e-11	0.145028	0.271	0.11	3.16629e-07	4	rbm4.2
sdha	2.02599e-11	0.140738	0.449	0.214	3.32546e-07	4	sdha
dldh1	2.15923e-11	0.14726	0.478	0.236	3.54416e-07	4	dldh
foxp41	2.20739e-11	0.226694	0.874	0.599	3.62321e-07	4	foxp4
mmgt1	2.23026e-11	0.130027	0.242	0.093	3.66074e-07	4	mmgt1
phf5a	2.24776e-11	0.107218	0.232	0.086	3.68947e-07	4	phf5a
acadsb	2.25082e-11	0.143637	0.232	0.088	3.69449e-07	4	acadsb
mrpl19	2.25639e-11	0.109192	0.14	0.04	3.70365e-07	4	mrpl19
pcxa	2.26154e-11	0.143539	0.29	0.122	3.7121e-07	4	pcxa
cox6c1	2.27315e-11	0.204081	0.802	0.482	3.73115e-07	4	cox6c
eny2	2.3296e-11	0.129849	0.174	0.057	3.82381e-07	4	eny2
mrpl421	2.64426e-11	0.131586	0.222	0.083	4.34029e-07	4	mrpl42
etfa	2.6873e-11	0.163581	0.386	0.186	4.41094e-07	4	etfa
ldhba1	2.71691e-11	0.230902	0.783	0.461	4.45954e-07	4	ldhba
leo11	2.85588e-11	0.160861	0.406	0.194	4.68764e-07	4	leo1
klhl41b1	2.90971e-11	0.170798	0.406	0.206	4.776e-07	4	klhl41b
aimp1a	2.98451e-11	0.124337	0.15	0.045	4.89878e-07	4	aimp1a
si:dkeyp-115e12.61	2.98618e-11	0.115644	0.208	0.074	4.90151e-07	4	si:dkeyp-115e12.6
hnrnpk	2.99827e-11	0.136386	0.357	0.161	4.92136e-07	4	hnrnpk
rrp1	3.03265e-11	0.169314	0.377	0.186	4.97779e-07	4	rrp1
mat2b	3.1037e-11	0.105781	0.184	0.062	5.09441e-07	4	mat2b
ilf3b	3.13789e-11	0.149467	0.295	0.125	5.15053e-07	4	ilf3b
metap1	3.16628e-11	0.118889	0.222	0.083	5.19714e-07	4	metap1
gpx4b	3.20513e-11	0.156763	0.565	0.293	5.2609e-07	4	gpx4b
psmd8	3.32019e-11	0.131228	0.203	0.073	5.44977e-07	4	psmd8
wdr5	3.43992e-11	0.104678	0.174	0.057	5.64628e-07	4	wdr5
tmem14ca	3.46234e-11	0.116724	0.203	0.072	5.68308e-07	4	tmem14ca
hnrpkl	3.47481e-11	0.168216	0.382	0.189	5.70356e-07	4	hnrpkl
psmb5	3.56086e-11	0.124092	0.232	0.088	5.8448e-07	4	psmb5
copa	3.68964e-11	0.122328	0.227	0.085	6.05617e-07	4	copa
srsf6a	3.70756e-11	0.135084	0.227	0.086	6.08559e-07	4	srsf6a
gskip	3.75807e-11	0.150931	0.319	0.14	6.1685e-07	4	gskip
sgk494a1	3.77425e-11	0.117492	0.203	0.074	6.19506e-07	4	sgk494a
brms1la	3.87501e-11	0.129094	0.222	0.084	6.36044e-07	4	brms1la
ppid	4.6196e-11	0.115191	0.184	0.063	7.58262e-07	4	ppid
zgc:56095	4.68611e-11	0.142508	0.232	0.09	7.69179e-07	4	zgc:56095
PAQR9	4.93168e-11	0.118551	0.203	0.075	8.09485e-07	4	PAQR9
psma8	5.08906e-11	0.172156	0.527	0.276	8.35318e-07	4	psma8
abtb2b1	5.60813e-11	0.112004	0.203	0.075	9.20519e-07	4	abtb2b
glula1	5.6317e-11	0.162413	0.57	0.301	9.24387e-07	4	glula
mrpl34	5.77453e-11	0.152521	0.275	0.116	9.47831e-07	4	mrpl34
STMP1	5.78247e-11	0.141279	0.541	0.277	9.49135e-07	4	STMP1
BX908803.21	5.95717e-11	0.121474	0.184	0.065	9.77809e-07	4	BX908803.2
rimkla	5.98501e-11	0.124554	0.203	0.076	9.82379e-07	4	rimkla
ssu72	6.14596e-11	0.108126	0.208	0.075	1.0088e-06	4	ssu72
atp5fa11	6.1916e-11	0.229357	0.976	0.79	1.01629e-06	4	atp5fa1
khsrp	6.24222e-11	0.15162	0.222	0.084	1.0246e-06	4	khsrp
si:zfos-1192g2.3	6.35435e-11	0.139333	0.309	0.134	1.043e-06	4	si:zfos-1192g2.3
rps92	6.66647e-11	0.120168	1	1	1.09423e-06	4	rps9
serbp1a1	6.70097e-11	0.170811	1	0.952	1.0999e-06	4	serbp1a
lbr	6.72951e-11	0.10895	0.15	0.046	1.10458e-06	4	lbr
atox1	6.99405e-11	0.155428	0.29	0.126	1.148e-06	4	atox1
ndufa9a	7.05653e-11	0.15195	0.338	0.154	1.15826e-06	4	ndufa9a
MRPS12	7.15102e-11	0.108557	0.208	0.075	1.17377e-06	4	MRPS12
ptmab2	7.39247e-11	0.270419	0.836	0.592	1.2134e-06	4	ptmab
si:ch211-136a13.11	7.47206e-11	0.172754	0.488	0.267	1.22646e-06	4	si:ch211-136a13.1
mrps10	7.82182e-11	0.116076	0.208	0.076	1.28387e-06	4	mrps10
hcfc1a	8.25182e-11	0.120744	0.188	0.066	1.35445e-06	4	hcfc1a
fkbp3	8.81004e-11	0.183993	0.275	0.121	1.44608e-06	4	fkbp3
trnau1apb	8.82374e-11	0.139138	0.304	0.132	1.44833e-06	4	trnau1apb
eif51	8.90387e-11	0.184807	0.585	0.316	1.46148e-06	4	eif5
cdkn1a	8.97872e-11	0.246133	0.29	0.135	1.47377e-06	4	cdkn1a
uqcrb1	9.3731e-11	0.167353	0.763	0.435	1.5385e-06	4	uqcrb
snrnp70	9.37326e-11	0.127309	0.28	0.118	1.53853e-06	4	snrnp70
ppifb	9.4931e-11	0.111869	0.188	0.066	1.5582e-06	4	ppifb
ppig	9.59153e-11	0.138117	0.198	0.072	1.57435e-06	4	ppig
nupr1b1	9.7904e-11	0.39047	0.807	0.656	1.607e-06	4	nupr1b
gcsha	9.91311e-11	0.124789	0.15	0.047	1.62714e-06	4	gcsha
ndufv3	1.0274e-10	0.139744	0.333	0.149	1.68638e-06	4	ndufv3
adi1	1.03628e-10	0.120999	0.227	0.087	1.70095e-06	4	adi1
fabp3	1.05467e-10	0.173111	0.377	0.179	1.73114e-06	4	fabp3
dhx15	1.11956e-10	0.131373	0.213	0.08	1.83764e-06	4	dhx15
micos13	1.15156e-10	0.164918	0.29	0.131	1.89018e-06	4	micos13
pgrmc11	1.16452e-10	0.180136	0.807	0.494	1.91145e-06	4	pgrmc1
sgta1	1.17132e-10	0.13192	0.237	0.094	1.9226e-06	4	sgta
cib1	1.29183e-10	0.130994	0.198	0.073	2.12041e-06	4	cib1
phf20b	1.31502e-10	0.171499	0.42	0.227	2.15848e-06	4	phf20b
tnika1	1.34077e-10	0.162726	0.546	0.29	2.20075e-06	4	tnika
ndufa2	1.3634e-10	0.156661	0.237	0.095	2.23789e-06	4	ndufa2
polr2k	1.41421e-10	0.116761	0.208	0.077	2.32128e-06	4	polr2k
luc7l3	1.60376e-10	0.140458	0.275	0.122	2.63241e-06	4	luc7l3
tomm7	1.6572e-10	0.143017	0.522	0.269	2.72012e-06	4	tomm7
rad50	1.69988e-10	0.107162	0.169	0.058	2.79018e-06	4	rad50
mt-nd51	1.75833e-10	0.198014	0.792	0.498	2.88612e-06	4	mt-nd5
slc31a21	1.7695e-10	0.17045	0.411	0.217	2.90446e-06	4	slc31a2
ppargc1b1	1.77114e-10	0.187923	0.744	0.433	2.90715e-06	4	ppargc1b
srrt	1.78035e-10	0.112765	0.174	0.061	2.92227e-06	4	srrt
zgc:91910	1.80887e-10	0.152889	0.44	0.22	2.96908e-06	4	zgc:91910
mt-co32	1.81085e-10	0.128028	1	1	2.97232e-06	4	mt-co3
mrpl28	1.81652e-10	0.118404	0.198	0.072	2.98164e-06	4	mrpl28
trib31	1.86643e-10	0.171855	0.478	0.25	3.06356e-06	4	trib3
hnrnpl2	1.87958e-10	0.127927	0.232	0.092	3.08514e-06	4	hnrnpl2
ssbp1	1.91412e-10	0.105794	0.15	0.047	3.14183e-06	4	ssbp1
mybbp1a	1.93481e-10	0.154197	0.348	0.172	3.17579e-06	4	mybbp1a
larp1b	1.93608e-10	0.10556	0.174	0.059	3.17788e-06	4	larp1b
cisd2	1.98998e-10	0.116423	0.217	0.085	3.26635e-06	4	cisd2
rps3a2	2.07325e-10	0.118453	1	1	3.40304e-06	4	rps3a
wrnip1	2.10055e-10	0.109628	0.179	0.064	3.44784e-06	4	wrnip1
chd1	2.11628e-10	0.119214	0.227	0.091	3.47366e-06	4	chd1
prpf39	2.2131e-10	0.160574	0.217	0.086	3.63259e-06	4	prpf39
dynlrb1	2.28556e-10	0.1461	0.396	0.193	3.75151e-06	4	dynlrb1
lyrm7	2.34662e-10	0.123004	0.179	0.063	3.85174e-06	4	lyrm7
rrp15	2.35652e-10	0.112661	0.121	0.034	3.86799e-06	4	rrp15
cct41	2.37892e-10	0.193097	0.758	0.466	3.90476e-06	4	cct4
ubap2l	2.37911e-10	0.140385	0.309	0.139	3.90508e-06	4	ubap2l
cox15	2.43114e-10	0.115768	0.217	0.085	3.99047e-06	4	cox15
cx431	2.44536e-10	0.221091	0.826	0.536	4.01382e-06	4	cx43
uqcrc1	2.46944e-10	0.17094	0.599	0.329	4.05334e-06	4	uqcrc1
tubb4b2	2.49295e-10	0.256505	0.86	0.575	4.09193e-06	4	tubb4b
ndufa1	2.50786e-10	0.171379	0.57	0.317	4.1164e-06	4	ndufa1
rnf128a1	2.56104e-10	0.115234	0.266	0.11	4.2037e-06	4	rnf128a
rab14	2.61687e-10	0.144802	0.377	0.182	4.29533e-06	4	rab14
slc1a3a1	2.65435e-10	0.173899	0.488	0.281	4.35685e-06	4	slc1a3a
psma5	2.66736e-10	0.135475	0.329	0.149	4.3782e-06	4	psma5
gnl2	2.73116e-10	0.11905	0.208	0.08	4.48292e-06	4	gnl2
hpgd1	2.78447e-10	0.168349	0.652	0.368	4.57044e-06	4	hpgd
ewsr1b	2.93905e-10	0.132083	0.275	0.118	4.82415e-06	4	ewsr1b
czib	3.00344e-10	0.116649	0.193	0.072	4.92985e-06	4	czib
thrap3b	3.06013e-10	0.118862	0.309	0.137	5.0229e-06	4	thrap3b
hikeshi	3.17794e-10	0.1533	0.3	0.139	5.21627e-06	4	hikeshi
znf346	3.18226e-10	0.118174	0.179	0.063	5.22336e-06	4	znf346
hnrnpm	3.20117e-10	0.116497	0.251	0.103	5.2544e-06	4	hnrnpm
ywhaqa1	3.51797e-10	0.169518	0.604	0.338	5.7744e-06	4	ywhaqa
snd1	3.56665e-10	0.142041	0.266	0.114	5.85429e-06	4	snd1
mcts1	3.56776e-10	0.123161	0.193	0.072	5.85612e-06	4	mcts1
sf3a3	3.58286e-10	0.105346	0.14	0.043	5.88091e-06	4	sf3a3
ndufb6	3.72233e-10	0.126147	0.251	0.104	6.10984e-06	4	ndufb6
cd82a1	3.84523e-10	0.172638	0.425	0.231	6.31156e-06	4	cd82a
mgmt	3.87094e-10	0.110084	0.193	0.071	6.35377e-06	4	mgmt
myo1d1	3.99772e-10	0.174441	0.449	0.253	6.56186e-06	4	myo1d
amd1	4.01211e-10	0.133692	0.271	0.116	6.58548e-06	4	amd1
nudcd3	4.04542e-10	0.12003	0.193	0.072	6.64016e-06	4	nudcd3
pdcd4a1	4.13069e-10	0.150436	0.377	0.184	6.78012e-06	4	pdcd4a
chd4b1	4.26725e-10	0.163778	0.449	0.232	7.00427e-06	4	chd4b
mrpl30	4.41542e-10	0.120971	0.242	0.098	7.24748e-06	4	mrpl30
tnpo2	4.5794e-10	0.133817	0.217	0.086	7.51662e-06	4	tnpo2
dad1	4.61771e-10	0.16072	0.58	0.319	7.57951e-06	4	dad1
gemin8	4.6624e-10	0.111143	0.193	0.071	7.65287e-06	4	gemin8
eif3c1	4.74654e-10	0.180175	0.527	0.293	7.79097e-06	4	eif3c
mibp	4.9856e-10	0.155154	0.203	0.077	8.18336e-06	4	mibp
eif3s101	5.19236e-10	0.19853	0.56	0.322	8.52274e-06	4	eif3s10
hm13	5.47423e-10	0.128521	0.159	0.054	8.9854e-06	4	hm13
meaf6	5.74659e-10	0.134084	0.295	0.131	9.43244e-06	4	meaf6
ndnl2	5.76147e-10	0.107901	0.101	0.026	9.45688e-06	4	ndnl2
kdelr2a	5.83029e-10	0.104504	0.246	0.1	9.56984e-06	4	kdelr2a
dnajc1	5.94216e-10	0.122181	0.213	0.083	9.75345e-06	4	dnajc1
pgk1	6.21491e-10	0.142859	0.483	0.253	1.02012e-05	4	pgk1
llph	6.27544e-10	0.161044	0.295	0.139	1.03005e-05	4	llph
sdhc	6.29333e-10	0.127485	0.396	0.193	1.03299e-05	4	sdhc
stox2a1	6.51769e-10	0.186055	0.556	0.342	1.06981e-05	4	stox2a
wipf1b1	6.62668e-10	0.125828	0.372	0.177	1.0877e-05	4	wipf1b
arpc1a	6.85891e-10	0.122217	0.242	0.1	1.12582e-05	4	arpc1a
drap1	6.98209e-10	0.143036	0.401	0.198	1.14604e-05	4	drap1
gtf2e2	7.41914e-10	0.111287	0.217	0.086	1.21778e-05	4	gtf2e2
gdi2	7.56057e-10	0.122975	0.522	0.276	1.24099e-05	4	gdi2
rnf7	7.619e-10	0.140024	0.319	0.148	1.25058e-05	4	rnf7
sod1	7.99974e-10	0.173775	0.725	0.417	1.31308e-05	4	sod1
vbp11	8.03467e-10	0.163687	0.391	0.198	1.31881e-05	4	vbp1
rcc2	8.28714e-10	0.135182	0.155	0.052	1.36025e-05	4	rcc2
SLC7A1 (1 of many)	9.33504e-10	0.100649	0.198	0.077	1.53225e-05	4	SLC7A1 (1 of many)
ap1s2	9.67375e-10	0.132392	0.391	0.194	1.58785e-05	4	ap1s2
zgc:865981	9.8424e-10	0.156736	0.333	0.16	1.61553e-05	4	zgc:86598
UTP14C	1.01295e-09	0.117215	0.275	0.124	1.66266e-05	4	UTP14C
arl14ep	1.02512e-09	0.11393	0.135	0.043	1.68263e-05	4	arl14ep
stip1	1.04703e-09	0.111104	0.242	0.1	1.71859e-05	4	stip1
egfra2	1.08548e-09	0.14445	0.551	0.319	1.78171e-05	4	egfra
matr3l1.1.1	1.12123e-09	0.10815	0.188	0.07	1.84038e-05	4	matr3l1.1.1
cct81	1.16864e-09	0.151639	0.309	0.146	1.9182e-05	4	cct8
blcap	1.19428e-09	0.131641	0.42	0.212	1.96029e-05	4	blcap
cpsf6	1.217e-09	0.121571	0.29	0.13	1.99758e-05	4	cpsf6
atp5f1c1	1.23424e-09	0.210479	0.865	0.599	2.02588e-05	4	atp5f1c
bms1	1.24828e-09	0.129916	0.319	0.155	2.04892e-05	4	bms1
trir	1.25368e-09	0.101095	0.159	0.055	2.05779e-05	4	trir
syncripl	1.259e-09	0.141837	0.324	0.161	2.06653e-05	4	syncripl
gbp2	1.28522e-09	0.114106	0.222	0.09	2.10957e-05	4	gbp
eif5b	1.34483e-09	0.142982	0.343	0.165	2.20741e-05	4	eif5b
tubg1	1.36356e-09	0.119272	0.198	0.079	2.23815e-05	4	tubg1
dock7	1.381e-09	0.15091	0.256	0.113	2.26678e-05	4	dock7
ppan	1.38484e-09	0.107779	0.159	0.055	2.27308e-05	4	ppan
dynll11	1.48375e-09	0.211364	0.285	0.128	2.43542e-05	4	dynll1
ndc1	1.49285e-09	0.102618	0.116	0.033	2.45036e-05	4	ndc1
atp6v1g1	1.51414e-09	0.103086	0.261	0.111	2.48531e-05	4	atp6v1g1
pdhb	1.59086e-09	0.148554	0.324	0.158	2.61124e-05	4	pdhb
atp5f1d1	1.63407e-09	0.170821	0.845	0.532	2.68216e-05	4	atp5f1d
sema7a1	1.69902e-09	0.136222	0.319	0.155	2.78876e-05	4	sema7a
cad1	1.70002e-09	0.196912	0.961	0.799	2.79041e-05	4	cad
psmb6	1.7827e-09	0.120208	0.488	0.255	2.92613e-05	4	psmb6
cops4	1.79314e-09	0.110755	0.188	0.071	2.94325e-05	4	cops4
GPR1391	1.81799e-09	0.136162	0.232	0.1	2.98405e-05	4	GPR139
eif3ha1	1.82914e-09	0.169628	0.763	0.451	3.00235e-05	4	eif3ha
pa2g4b1	1.8681e-09	0.144186	0.367	0.183	3.06629e-05	4	pa2g4b
pdia31	1.9243e-09	0.144929	0.56	0.313	3.15854e-05	4	pdia3
sdk1a2	1.9869e-09	0.139942	0.594	0.351	3.26129e-05	4	sdk1a
rplp01	2.05564e-09	0.134578	1	0.998	3.37412e-05	4	rplp0
hspb111	2.07328e-09	0.190714	0.217	0.09	3.40308e-05	4	hspb11
hccsb	2.08983e-09	0.124884	0.193	0.075	3.43024e-05	4	hccsb
arg21	2.13313e-09	0.135587	0.256	0.115	3.50131e-05	4	arg2
cmc2	2.15265e-09	0.102607	0.135	0.044	3.53336e-05	4	cmc2
cct71	2.21271e-09	0.163396	0.792	0.48	3.63194e-05	4	cct7
akirin2	2.3234e-09	0.108889	0.159	0.056	3.81364e-05	4	akirin2
nol10	2.60171e-09	0.140971	0.319	0.153	4.27045e-05	4	nol10
ctdspl2b	2.69467e-09	0.102899	0.203	0.082	4.42303e-05	4	ctdspl2b
sumo1	2.77811e-09	0.114095	0.3	0.137	4.55998e-05	4	sumo1
si:dkey-225k4.11	2.86899e-09	0.14633	0.734	0.43	4.70916e-05	4	si:dkey-225k4.1
necap2	3.01827e-09	0.134774	0.353	0.183	4.95418e-05	4	necap2
srp19	3.08657e-09	0.121669	0.203	0.081	5.06629e-05	4	srp19
h3f3b.1.2	3.10318e-09	0.160535	0.758	0.462	5.09356e-05	4	h3f3b.1.2
h2afy2	3.28486e-09	0.138739	0.517	0.281	5.39177e-05	4	h2afy2
atp5pf	3.41392e-09	0.191819	0.816	0.534	5.60361e-05	4	atp5pf
comta1	3.54325e-09	0.147242	0.382	0.206	5.81589e-05	4	comta
myo1ea1	3.5707e-09	0.13818	0.333	0.17	5.86094e-05	4	myo1ea
nedd91	3.84829e-09	0.122592	0.242	0.108	6.31658e-05	4	nedd9
ufm1	3.92518e-09	0.121789	0.295	0.135	6.44278e-05	4	ufm1
ddx18	3.97056e-09	0.100393	0.193	0.075	6.51727e-05	4	ddx18
lsm12b1	4.06205e-09	0.136353	0.56	0.312	6.66745e-05	4	lsm12b
tia1l	4.07113e-09	0.121569	0.213	0.086	6.68235e-05	4	tia1l
sash1a1	4.09467e-09	0.177018	0.507	0.286	6.721e-05	4	sash1a
aifm1	4.14169e-09	0.112278	0.213	0.088	6.79817e-05	4	aifm1
kif26aa1	4.23298e-09	0.113858	0.169	0.064	6.94801e-05	4	kif26aa
pho	4.49597e-09	0.164061	0.551	0.31	7.37969e-05	4	pho
dynll2b1	4.50997e-09	0.105407	0.459	0.233	7.40267e-05	4	dynll2b
ppp2cb	4.60146e-09	0.157996	0.609	0.35	7.55284e-05	4	ppp2cb
thop1	4.71671e-09	0.114682	0.135	0.044	7.74201e-05	4	thop1
npat	4.85009e-09	0.102854	0.169	0.064	7.96093e-05	4	npat
txndc15	4.97896e-09	0.100572	0.193	0.075	8.17247e-05	4	txndc15
ube2ia	5.17931e-09	0.107288	0.285	0.129	8.50131e-05	4	ube2ia
ddx24	5.28973e-09	0.134095	0.295	0.142	8.68256e-05	4	ddx24
atp5po1	5.88248e-09	0.184528	0.879	0.61	9.65549e-05	4	atp5po
sypl2a	5.88766e-09	0.109138	0.261	0.115	9.66401e-05	4	sypl2a
imp3	5.89781e-09	0.100712	0.101	0.029	9.68067e-05	4	imp3
copz1	5.9735e-09	0.112526	0.237	0.102	9.8049e-05	4	copz1
sdhb	6.22266e-09	0.116563	0.435	0.224	0.000102139	4	sdhb
tomm20b1	6.65378e-09	0.130415	0.58	0.326	0.000109215	4	tomm20b
ppp5c	6.76215e-09	0.127842	0.285	0.138	0.000110994	4	ppp5c
ube2v11	6.8474e-09	0.115668	0.517	0.281	0.000112393	4	ube2v1
vegfab1	7.09893e-09	0.148887	0.324	0.167	0.000116522	4	vegfab
golph3	7.1247e-09	0.100465	0.222	0.093	0.000116945	4	golph3
plrg1	7.17016e-09	0.102687	0.198	0.081	0.000117691	4	plrg1
mafba1	7.60614e-09	0.120961	0.618	0.357	0.000124847	4	mafba
ssr31	8.00385e-09	0.143917	0.705	0.422	0.000131375	4	ssr3
ak21	8.03763e-09	0.120644	0.454	0.242	0.00013193	4	ak2
rnps1	8.11458e-09	0.10228	0.174	0.065	0.000133193	4	rnps1
actr2a	8.68266e-09	0.125322	0.256	0.117	0.000142517	4	actr2a
csde11	9.24411e-09	0.15736	0.454	0.252	0.000151733	4	csde1
rogdi	9.2886e-09	0.109316	0.155	0.056	0.000152463	4	rogdi
ap2s1	9.36806e-09	0.119529	0.357	0.181	0.000153767	4	ap2s1
psma2	9.95739e-09	0.166488	0.377	0.202	0.000163441	4	psma2
chd7	1.01859e-08	0.102387	0.217	0.091	0.000167191	4	chd7
jam2a1	1.06455e-08	0.161755	0.72	0.455	0.000174735	4	jam2a
tp53bp1	1.13327e-08	0.111507	0.203	0.086	0.000186015	4	tp53bp1
ska2	1.13558e-08	0.117653	0.271	0.124	0.000186394	4	ska2
fam162a	1.14459e-08	0.112461	0.275	0.127	0.000187872	4	fam162a
szrd1	1.14764e-08	0.102824	0.227	0.096	0.000188374	4	szrd1
ddx27	1.18637e-08	0.124669	0.188	0.075	0.00019473	4	ddx27
mrto4	1.2375e-08	0.115129	0.155	0.057	0.000203123	4	mrto4
hspa81	1.24642e-08	0.26293	0.928	0.723	0.000204587	4	hspa8
dpysl5a1	1.24808e-08	0.110424	0.193	0.08	0.000204859	4	dpysl5a
taf12	1.25559e-08	0.109909	0.275	0.127	0.000206093	4	taf12
si:dkey-67c22.2	1.30441e-08	0.113188	0.42	0.224	0.000214105	4	si:dkey-67c22.2
emc10	1.35028e-08	0.102295	0.256	0.115	0.000221634	4	emc10
ebag9	1.50505e-08	0.117757	0.188	0.075	0.00024704	4	ebag9
zgc:1935411	1.53098e-08	0.179628	0.831	0.55	0.000251295	4	zgc:193541
thoc2	1.55297e-08	0.132911	0.314	0.154	0.000254905	4	thoc2
dap	1.5891e-08	0.108479	0.217	0.092	0.000260834	4	dap
tbcb1	1.63024e-08	0.124204	0.319	0.16	0.000267588	4	tbcb
u2af2b	1.65196e-08	0.134972	0.377	0.196	0.000271153	4	u2af2b
crip2	1.79261e-08	0.117715	0.454	0.253	0.000294239	4	crip2
rps61	2.01102e-08	0.134532	1	0.989	0.000330089	4	rps6
eno31	2.01568e-08	0.159599	0.309	0.152	0.000330854	4	eno3
slc13a4	2.03488e-08	0.12304	0.275	0.136	0.000334006	4	slc13a4
hibadhb	2.09672e-08	0.130582	0.271	0.131	0.000344156	4	hibadhb
uqcrq	2.1217e-08	0.116991	0.551	0.31	0.000348257	4	uqcrq
per3	2.14382e-08	0.119764	0.401	0.212	0.000351886	4	per3
rtf1	2.17864e-08	0.107546	0.275	0.13	0.000357601	4	rtf1
ndufs8a1	2.2119e-08	0.116392	0.449	0.241	0.000363062	4	ndufs8a
vdac11	2.22653e-08	0.120285	0.618	0.357	0.000365463	4	vdac1
cbsa	2.25598e-08	0.105987	0.227	0.102	0.000370296	4	cbsa
rpl37	2.28382e-08	0.137659	0.995	0.99	0.000374866	4	rpl3
baz1b	2.36933e-08	0.131094	0.271	0.133	0.000388902	4	baz1b
limch1b1	2.45323e-08	0.135087	0.546	0.33	0.000402673	4	limch1b
impdh1b1	2.55318e-08	0.154723	0.725	0.45	0.000419079	4	impdh1b
ptgr1	2.71841e-08	0.119004	0.237	0.105	0.0004462	4	ptgr1
tbca	3.05152e-08	0.11182	0.531	0.296	0.000500876	4	tbca
si:ch73-37h15.2	3.07299e-08	0.125712	0.42	0.238	0.000504401	4	si:ch73-37h15.2
COX5B1	3.07991e-08	0.206086	0.874	0.64	0.000505537	4	COX5B
rab2a	3.31329e-08	0.112341	0.565	0.32	0.000543843	4	rab2a
si:dkey-230p4.1	3.38624e-08	0.104899	0.188	0.079	0.000555817	4	si:dkey-230p4.1
gspt1l1	3.45417e-08	0.103598	0.319	0.157	0.000566967	4	gspt1l
hgh1	3.56701e-08	0.102013	0.184	0.076	0.000585489	4	hgh1
eif3ea1	3.67989e-08	0.172099	0.86	0.588	0.000604018	4	eif3ea
aurkaip1	3.69146e-08	0.10006	0.111	0.035	0.000605916	4	aurkaip1
idh2	3.7209e-08	0.12116	0.551	0.315	0.000610749	4	idh2
yes1	3.73682e-08	0.102387	0.213	0.091	0.000613362	4	yes1
ppp1caa	3.77742e-08	0.119767	0.314	0.156	0.000620026	4	ppp1caa
serpinh1a	3.79966e-08	0.14013	0.609	0.399	0.000623676	4	serpinh1a
slc7a3a2	3.85815e-08	0.166874	0.845	0.561	0.000633276	4	slc7a3a
wtap	3.88603e-08	0.117446	0.198	0.084	0.000637852	4	wtap
slc27a1a1	3.88889e-08	0.131665	0.551	0.327	0.000638322	4	slc27a1a
ndufb41	4.18931e-08	0.112592	0.57	0.323	0.000687633	4	ndufb4
bud23	4.24195e-08	0.106779	0.29	0.145	0.000696274	4	bud23
tmem107.1	4.25711e-08	0.104685	0.227	0.104	0.000698762	4	tmem107.1
eif4a2	4.27982e-08	0.111499	0.324	0.162	0.00070249	4	eif4a2
elof1	4.29191e-08	0.107694	0.401	0.211	0.000704474	4	elof1
pfn2l	4.33454e-08	0.155334	0.749	0.479	0.000711471	4	pfn2l
smad21	4.45433e-08	0.154659	0.705	0.435	0.000731133	4	smad2
dazap2	4.60844e-08	0.116928	0.203	0.087	0.000756429	4	dazap2
col1a1b	4.69283e-08	0.210046	0.135	0.048	0.000770281	4	col1a1b
cox17	4.85554e-08	0.14515	0.14	0.05	0.000796988	4	cox17
ube2ib	5.04856e-08	0.123441	0.338	0.174	0.00082867	4	ube2ib
h3f3b.1.1	5.15627e-08	0.183711	0.947	0.776	0.00084635	4	h3f3b.1.1
aamp1	5.21754e-08	0.136488	0.425	0.234	0.000856406	4	aamp
hspa14	5.26344e-08	0.10006	0.106	0.033	0.000863942	4	hspa14
prpf8	5.32575e-08	0.106373	0.232	0.105	0.000874168	4	prpf8
mgat4b1	5.60519e-08	0.129826	0.304	0.159	0.000920035	4	mgat4b
mdn1	5.6294e-08	0.128005	0.28	0.142	0.000924009	4	mdn1
papolg	5.66137e-08	0.110069	0.227	0.101	0.000929258	4	papolg
rgl11	5.81268e-08	0.171627	0.435	0.266	0.000954094	4	rgl1
ddx47	5.83433e-08	0.105765	0.184	0.075	0.000957647	4	ddx47
txndc91	6.00355e-08	0.132548	0.338	0.175	0.000985423	4	txndc9
brd3a	6.11457e-08	0.10319	0.198	0.084	0.00100365	4	brd3a
twistnb	6.25067e-08	0.118949	0.227	0.103	0.00102599	4	twistnb
BX511111.1	6.42715e-08	0.102487	0.309	0.159	0.00105495	4	BX511111.1
rac1a	6.45498e-08	0.135614	0.357	0.19	0.00105952	4	rac1a
cox7b1	6.60963e-08	0.146989	0.705	0.426	0.0010849	4	cox7b
esf1	6.72303e-08	0.160056	0.295	0.158	0.00110352	4	esf1
sms	6.96333e-08	0.116548	0.246	0.119	0.00114296	4	sms
gstr1	7.07821e-08	0.123811	0.647	0.389	0.00116182	4	gstr
p4hb1	7.08345e-08	0.125202	0.203	0.086	0.00116268	4	p4hb
pabpc1a1	7.12437e-08	0.198698	0.976	0.773	0.00116939	4	pabpc1a
mob3a	7.18249e-08	0.122685	0.208	0.092	0.00117893	4	mob3a
trit1	7.44386e-08	0.118211	0.174	0.073	0.00122183	4	trit1
tmed7	7.68663e-08	0.109969	0.43	0.235	0.00126168	4	tmed7
her4.21	7.70076e-08	0.151397	0.314	0.164	0.001264	4	her4.2
chac12	7.73171e-08	0.182576	0.787	0.55	0.00126908	4	chac1
appa2	7.88584e-08	0.159381	0.995	0.936	0.00129438	4	appa
rpf1	7.99597e-08	0.107022	0.193	0.082	0.00131246	4	rpf1
pfn22	8.0696e-08	0.133119	0.754	0.458	0.00132454	4	pfn2
taf13	8.20795e-08	0.115415	0.377	0.2	0.00134725	4	taf13
eif1ad	8.71675e-08	0.110021	0.28	0.136	0.00143077	4	eif1ad
hars	8.96475e-08	0.105119	0.246	0.118	0.00147147	4	hars
erf1	9.02557e-08	0.129639	0.343	0.189	0.00148146	4	erf
rps22	9.31866e-08	0.11046	0.995	0.999	0.00152956	4	rps2
prps1b	9.87755e-08	0.113329	0.251	0.123	0.0016213	4	prps1b
atp5mea1	1.0137e-07	0.118834	0.604	0.36	0.00166388	4	atp5mea
crls1	1.02578e-07	0.100101	0.213	0.096	0.00168371	4	crls1
nucb2b1	1.04028e-07	0.116597	0.193	0.085	0.00170751	4	nucb2b
dnaja2a	1.04264e-07	0.114758	0.638	0.377	0.00171139	4	dnaja2a
cnnm2b1	1.10776e-07	0.118256	0.415	0.24	0.00181828	4	cnnm2b
ywhaba	1.13893e-07	0.124369	0.797	0.487	0.00186944	4	ywhaba
atp6v1e1b	1.14316e-07	0.103685	0.237	0.11	0.00187638	4	atp6v1e1b
tsta31	1.1922e-07	0.119539	0.222	0.105	0.00195688	4	tsta3
svild1	1.20289e-07	0.13783	0.705	0.429	0.00197443	4	svild
si:dkey-44g23.5	1.22324e-07	0.104004	0.135	0.05	0.00200783	4	si:dkey-44g23.5
hprt11	1.27517e-07	0.137297	0.787	0.499	0.00209307	4	hprt1
rcn1	1.37521e-07	0.105556	0.208	0.095	0.00225727	4	rcn1
hspe11	1.39286e-07	0.178941	0.952	0.748	0.00228623	4	hspe1
eya21	1.39574e-07	0.15925	0.58	0.383	0.00229096	4	eya2
MZT1	1.50945e-07	0.114244	0.242	0.118	0.00247761	4	MZT1
tmed9	1.56753e-07	0.1223	0.261	0.127	0.00257294	4	tmed9
cstf2	1.59512e-07	0.109469	0.169	0.07	0.00261822	4	cstf2
her4.11	1.60001e-07	0.14114	0.411	0.24	0.00262626	4	her4.1
coq9	1.66143e-07	0.115215	0.261	0.13	0.00272708	4	coq9
tfr1a1	1.69508e-07	0.150737	0.348	0.199	0.00278231	4	tfr1a
gid8a	1.72465e-07	0.105333	0.242	0.118	0.00283084	4	gid8a
rps4x1	1.72489e-07	0.112051	1	0.997	0.00283123	4	rps4x
arpc41	1.79112e-07	0.10576	0.193	0.084	0.00293995	4	arpc4
atp6v0ca	1.85522e-07	0.102477	0.42	0.232	0.00304515	4	atp6v0ca
ywhae2	1.89542e-07	0.124856	0.42	0.248	0.00311114	4	ywhae2
cbsb1	1.93804e-07	0.105513	0.295	0.15	0.0031811	4	cbsb
rplp12	1.98985e-07	0.102634	1	1	0.00326614	4	rplp1
hnrnpul1	2.16019e-07	0.125758	0.357	0.204	0.00354574	4	hnrnpul1
ywhabb	2.23918e-07	0.116946	0.536	0.313	0.00367539	4	ywhabb
rabif	2.30214e-07	0.105991	0.203	0.093	0.00377874	4	rabif
CR753876.11	2.42509e-07	0.124827	0.261	0.128	0.00398055	4	CR753876.1
spcs2	2.54197e-07	0.132571	0.401	0.231	0.0041724	4	spcs2
gstt1a1	2.66936e-07	0.136657	0.372	0.217	0.00438148	4	gstt1a
ccdc85al1	2.6931e-07	0.13329	0.304	0.166	0.00442045	4	ccdc85al
syncrip	2.69613e-07	0.140188	0.797	0.509	0.00442543	4	syncrip
gnai2a	2.76052e-07	0.111529	0.348	0.184	0.00453113	4	gnai2a
GCA	2.92825e-07	0.110381	0.348	0.186	0.00480643	4	GCA
atp5pb1	3.06457e-07	0.185658	0.884	0.648	0.00503018	4	atp5pb
atp6v1ba	3.07504e-07	0.102487	0.188	0.084	0.00504737	4	atp6v1ba
si:ch211-132g1.31	3.14e-07	0.132341	0.246	0.126	0.005154	4	si:ch211-132g1.3
med31	3.14154e-07	0.105538	0.208	0.094	0.00515652	4	med31
pwp1	3.1495e-07	0.130006	0.285	0.152	0.0051696	4	pwp1
sdad1	3.17967e-07	0.111927	0.184	0.08	0.00521911	4	sdad1
lygl1	3.29159e-07	0.107674	0.29	0.15	0.00540281	4	lygl1
arl8	3.34432e-07	0.11559	0.261	0.133	0.00548937	4	arl8
ybx11	3.389e-07	0.140814	0.995	0.969	0.00556271	4	ybx1
pcolce2b1	3.49299e-07	0.134289	0.314	0.174	0.00573339	4	pcolce2b
chtopa	4.03099e-07	0.108228	0.425	0.237	0.00661647	4	chtopa
phb2b	4.10131e-07	0.100265	0.304	0.162	0.00673189	4	phb2b
vcp	4.41393e-07	0.102477	0.29	0.149	0.00724502	4	vcp
ADGRL31	4.64473e-07	0.123612	0.628	0.42	0.00762386	4	ADGRL3
ahcyl1	5.15049e-07	0.107385	0.271	0.142	0.00845401	4	ahcyl1
vapb	5.5154e-07	0.122316	0.28	0.145	0.00905298	4	vapb
rexo4	5.59399e-07	0.101408	0.266	0.137	0.00918198	4	rexo4
arf5	5.7052e-07	0.108313	0.401	0.224	0.00936452	4	arf5
psmd14	5.94132e-07	0.109435	0.174	0.075	0.00975208	4	psmd14
h3f3d	6.5053e-07	0.167989	0.957	0.849	0.0106778	4	h3f3d
clstn11	6.60999e-07	0.109464	0.662	0.433	0.0108496	4	clstn1
rnf144ab	7.24404e-07	0.110839	0.208	0.099	0.0118904	4	rnf144ab
ap1m1	7.29765e-07	0.122307	0.449	0.273	0.0119784	4	ap1m1
naa101	7.84368e-07	0.102037	0.357	0.196	0.0128746	4	naa10
chpt11	7.95174e-07	0.122483	0.314	0.178	0.013052	4	chpt1
prkar2aa1	8.4885e-07	0.112977	0.28	0.147	0.013933	4	prkar2aa
sort1a2	8.56698e-07	0.105598	0.754	0.518	0.0140618	4	sort1a
RASSF51	8.63868e-07	0.111726	0.488	0.303	0.0141795	4	RASSF5
pcbp2	8.96226e-07	0.115285	0.488	0.288	0.0147107	4	pcbp2
hdgfl2	9.00497e-07	0.137132	0.362	0.213	0.0147807	4	hdgfl2
fam120c	9.4361e-07	0.101786	0.647	0.405	0.0154884	4	fam120c
arf2a	9.48631e-07	0.106374	0.338	0.184	0.0155708	4	arf2a
rhebl1	9.72043e-07	0.125975	0.29	0.158	0.0159551	4	rhebl1
si:ch211-271b14.1	9.80842e-07	0.121606	0.246	0.125	0.0160995	4	si:ch211-271b14.1
znf1035	9.97085e-07	0.113145	0.237	0.115	0.0163661	4	znf1035
cebpz	1.01655e-06	0.112512	0.242	0.125	0.0166857	4	cebpz
zfhx31	1.01909e-06	0.149531	0.7	0.465	0.0167274	4	zfhx3
ier3ip1	1.02305e-06	0.104715	0.28	0.149	0.0167924	4	ier3ip1
elob.1	1.03178e-06	0.100761	0.377	0.209	0.0169356	4	elob.1
neil1	1.04077e-06	0.122659	0.213	0.106	0.0170832	4	neil1
si:dkey-159f12.2	1.0655e-06	0.120248	0.357	0.208	0.0174891	4	si:dkey-159f12.2
crk	1.10776e-06	0.112287	0.304	0.17	0.0181828	4	crk
rpl61	1.18341e-06	0.202594	0.928	0.74	0.0194245	4	rpl6
ano5b1	1.31954e-06	0.106162	0.575	0.366	0.021659	4	ano5b
irf2bp2b	1.3237e-06	0.103396	0.29	0.153	0.0217272	4	irf2bp2b
gstz11	1.34759e-06	0.108403	0.391	0.232	0.0221194	4	gstz1
ccng11	1.36648e-06	0.112099	0.72	0.45	0.0224295	4	ccng1
rnf144b1	1.4119e-06	0.119361	0.28	0.154	0.0231749	4	rnf144b
tma16	1.45726e-06	0.100242	0.179	0.082	0.0239194	4	tma16
btbd6a1	1.49217e-06	0.122939	0.527	0.344	0.0244925	4	btbd6a
cox5aa1	1.71611e-06	0.177677	0.816	0.564	0.0281682	4	cox5aa
rnf185	1.89392e-06	0.103847	0.198	0.094	0.0310868	4	rnf185
hyou1	2.04918e-06	0.105805	0.097	0.033	0.0336353	4	hyou1
polr3glb	2.12404e-06	0.10773	0.314	0.18	0.0348639	4	polr3glb
rps171	2.22515e-06	0.171197	0.976	0.852	0.0365236	4	rps17
si:busm1-105l16.2.1	2.6313e-06	0.105924	0.3	0.169	0.0431902	4	si:busm1-105l16.2.1
si:dkeyp-120h9.1	2.68026e-06	0.108047	0.251	0.135	0.0439938	4	si:dkeyp-120h9.1
srrm2	2.82235e-06	0.118766	0.266	0.139	0.0463261	4	srrm2
mpc1	3.25552e-06	0.132041	0.469	0.308	0.053436	4	mpc1
si:ch211-200p22.4	3.42812e-06	0.10871	0.309	0.178	0.0562691	4	si:ch211-200p22.4
phb2a	3.55394e-06	0.110217	0.353	0.209	0.0583344	4	phb2a
npm1b	3.63347e-06	0.104087	0.275	0.153	0.0596397	4	npm1b
psip1b	3.88893e-06	0.11672	0.3	0.169	0.0638328	4	psip1b
fmnl2a1	4.00086e-06	0.104909	0.246	0.132	0.0656702	4	fmnl2a
ssr4	4.2639e-06	0.126459	0.58	0.369	0.0699876	4	ssr4
inhbaa1	4.33996e-06	0.171775	0.807	0.588	0.0712361	4	inhbaa
hmgb1b	6.55499e-06	0.110496	0.72	0.482	0.107594	4	hmgb1b
alyref1	6.95398e-06	0.130291	0.309	0.171	0.114143	4	alyref
chrna11	8.02456e-06	0.126939	0.343	0.214	0.131715	4	chrna1
adgrg1.1	8.44875e-06	0.114559	0.261	0.149	0.138678	4	adgrg1.1
brd2a	9.50952e-06	0.10635	0.333	0.194	0.156089	4	brd2a
si:ch73-308l14.2	9.79337e-06	0.11752	0.338	0.205	0.160748	4	si:ch73-308l14.2
mcl1b2	1.01992e-05	0.144675	0.502	0.332	0.16741	4	mcl1b
cnpy3	1.06342e-05	0.113262	0.271	0.157	0.174549	4	cnpy3
ncoa5	1.10534e-05	0.104363	0.338	0.202	0.18143	4	ncoa5
ndufa4l1	1.38968e-05	0.1393	0.966	0.902	0.228102	4	ndufa4l
AL954696.1	1.41563e-05	0.121147	0.222	0.117	0.232361	4	AL954696.1
adh52	1.49215e-05	0.10303	0.58	0.375	0.244921	4	adh5
atp5f1e1	1.7889e-05	0.132881	0.826	0.571	0.293631	4	atp5f1e
ednrab1	2.06973e-05	0.103168	0.42	0.274	0.339726	4	ednrab
gars	2.17608e-05	0.100709	0.246	0.139	0.357182	4	gars
h2afx11	2.25226e-05	0.133605	0.749	0.55	0.369686	4	h2afx1
hsp90b11	2.37891e-05	0.109709	0.164	0.078	0.390475	4	hsp90b1
lrpap1	2.68001e-05	0.108979	0.271	0.16	0.439897	4	lrpap1
pde4ba1	4.14283e-05	0.114762	0.889	0.647	0.680004	4	pde4ba
mtdhb	4.78106e-05	0.100247	0.275	0.166	0.784764	4	mtdhb
rrm2.1	0.00015188	0.282846	0.053	0.017	1	4	rrm2.1
MPRIP1	7.2559e-05	0.110974	0.314	0.199	1	4	MPRIP
gcdha	0.000399018	0.106798	0.348	0.242	1	4	gcdha
si:ch211-204c21.1.1	0.000105311	0.104581	0.401	0.275	1	4	si:ch211-204c21.1.1
mdh21	0.0001591	0.127354	0.836	0.592	1	4	mdh2
slc38a5b2	0.000248839	0.10792	0.855	0.649	1	4	slc38a5b
her61	0.000214195	0.133948	0.797	0.712	1	4	her6
myl12.11	0.000187994	0.130707	0.937	0.772	1	4	myl12.1
eif3f1	7.06705e-05	0.145034	0.952	0.775	1	4	eif3f
atp5mc3b2	0.000592947	0.103762	0.995	0.98	1	4	atp5mc3b

## Sheet: Stage IA (SC 1)
	p_val	avg_logFC	pct.1	pct.2	p_val_adj	cluster	gene
cd74b	0	1.45307	0.943	0.449	0	1	cd74b
cd74a	0	1.38075	0.929	0.42	0	1	cd74a
marcksl1a	0	1.1313	0.981	0.644	0	1	marcksl1a
sparc	0	0.922825	0.996	0.866	0	1	sparc
itm2bb	0	0.693641	1	0.977	0	1	itm2bb
marcksl1b	1.10878e-297	1.09688	0.975	0.678	1.81994e-293	1	marcksl1b
fxyd6l	1.10709e-278	1.06442	0.911	0.501	1.81718e-274	1	fxyd6l
ifi30	7.69662e-232	1.17355	0.731	0.303	1.26332e-227	1	ifi30
pdgfra	8.10542e-231	0.778965	0.958	0.612	1.33042e-226	1	pdgfra
akap12b	5.83277e-227	0.895613	0.844	0.469	9.57391e-223	1	akap12b
rerglb	1.21529e-217	0.648757	0.591	0.141	1.99478e-213	1	rerglb
htra1b	2.25546e-217	0.875323	0.749	0.305	3.70211e-213	1	htra1b
cxcl14	1.21572e-203	0.965283	0.707	0.294	1.99549e-199	1	cxcl14
ivns1abpa	3.58817e-203	0.571134	0.997	0.9	5.88962e-199	1	ivns1abpa
htra1a	1.33852e-193	0.608334	0.653	0.22	2.19705e-189	1	htra1a
krt18a.1	9.06204e-186	0.594247	0.978	0.896	1.48744e-181	1	krt18a.1
tp53inp1	2.11745e-183	0.789516	0.64	0.229	3.47558e-179	1	tp53inp1
b2m	4.31624e-167	0.679462	0.981	0.787	7.08468e-163	1	b2m
plpp1a	1.42264e-157	0.6936	0.5	0.137	2.33512e-153	1	plpp1a
gstt1b	3.54855e-148	0.606875	0.888	0.692	5.82459e-144	1	gstt1b
zgc:103700	9.80611e-136	0.747515	0.517	0.171	1.60958e-131	1	zgc:103700
mhc2b	1.70516e-132	0.594592	0.44	0.118	2.79884e-128	1	mhc2b
si:busm1-194e12.11	3.37557e-130	0.445353	0.438	0.111	5.54066e-126	1	si:busm1-194e12.11
lamb2l	2.70157e-129	0.447972	0.56	0.206	4.43436e-125	1	lamb2l
tmsb1	4.67671e-126	0.610453	0.769	0.431	7.67636e-122	1	tmsb1
alcama	3.08589e-124	0.403617	0.991	0.97	5.06518e-120	1	alcama
psap	3.07275e-122	0.513843	0.867	0.724	5.04361e-118	1	psap
ponzr1	1.14536e-121	0.35058	0.998	0.977	1.87999e-117	1	ponzr1
aldoaa	2.47038e-120	0.400905	0.961	0.889	4.05489e-116	1	aldoaa
klf6a	6.51291e-120	0.795648	0.801	0.566	1.06903e-115	1	klf6a
oaz1a	6.94834e-120	0.43393	0.99	0.936	1.1405e-115	1	oaz1a
gas6	2.23675e-119	0.650931	0.465	0.163	3.67141e-115	1	gas6
gsdf	5.87769e-118	0.597266	0.999	0.978	9.64763e-114	1	gsdf
si:busm1-266f07.2	5.41997e-115	0.882471	0.446	0.146	8.89634e-111	1	si:busm1-266f07.2
tent5ba	3.30954e-111	0.527105	0.39	0.107	5.43228e-107	1	tent5ba
socs3a	2.71965e-108	0.745499	0.915	0.801	4.46403e-104	1	socs3a
bambia	3.44048e-106	0.677324	0.697	0.465	5.64721e-102	1	bambia
si:ch73-158p21.3	5.99382e-106	0.318804	0.332	0.075	9.83825e-102	1	si:ch73-158p21.3
agrn	2.85117e-103	0.536906	0.769	0.525	4.6799e-99	1	agrn
hsp70.2	5.5514e-99	0.704933	0.937	0.877	9.11207e-95	1	hsp70.2
hsp70.1	1.31058e-91	0.706305	0.902	0.826	2.15119e-87	1	hsp70.1
grna	2.73274e-88	0.299228	0.348	0.101	4.48552e-84	1	grna
ramp2	5.24254e-88	0.458388	0.427	0.161	8.6051e-84	1	ramp2
cldn11a	7.43909e-85	0.333607	0.996	0.972	1.22105e-80	1	cldn11a
CR383676.1	8.454e-84	0.206462	1	1	1.38764e-79	1	CR383676.1
zgc:92275	3.37888e-83	0.413535	0.426	0.17	5.54609e-79	1	zgc:92275
ccbe1	8.63517e-81	0.230797	0.254	0.055	1.41738e-76	1	ccbe1
wu:fj16a03	9.90073e-78	0.396339	0.403	0.153	1.62511e-73	1	wu:fj16a03
smoc2	2.58796e-77	0.428816	0.75	0.553	4.24787e-73	1	smoc2
slit3	7.67363e-77	0.325477	0.413	0.164	1.25955e-72	1	slit3
enpp6	9.43512e-75	0.30487	0.375	0.137	1.54868e-70	1	enpp6
hey2	1.59384e-74	0.498565	0.632	0.43	2.61613e-70	1	hey2
mbnl3	8.65218e-74	0.501267	0.652	0.462	1.42017e-69	1	mbnl3
clu	1.11219e-73	0.253267	0.22	0.044	1.82556e-69	1	clu
tmsb4x	2.70461e-73	0.241039	1	0.997	4.43934e-69	1	tmsb4x
si:ch73-1a9.3	6.45119e-72	0.362683	0.889	0.842	1.0589e-67	1	si:ch73-1a9.3
cldn11b	6.36324e-71	0.324714	0.481	0.227	1.04446e-66	1	cldn11b
hsp70.3	1.52144e-70	0.622088	0.883	0.804	2.4973e-66	1	hsp70.3
krt8	2.54371e-69	0.266879	0.948	0.905	4.17525e-65	1	krt8
jun	4.13315e-69	0.43846	0.967	0.918	6.78416e-65	1	jun
cygb1	7.99245e-68	0.469933	0.412	0.184	1.31188e-63	1	cygb1
gadd45ba	3.49276e-67	0.602517	0.848	0.766	5.73302e-63	1	gadd45ba
actb1	7.29651e-67	0.473867	0.846	0.717	1.19765e-62	1	actb1
mycn	7.96719e-66	0.319461	0.324	0.113	1.30773e-61	1	mycn
cfl2	3.25249e-65	0.320049	0.499	0.26	5.33865e-61	1	cfl2
col4a6	1.06891e-64	0.381142	0.789	0.69	1.75451e-60	1	col4a6
si:dkey-7j14.6	1.30927e-64	0.339297	0.792	0.7	2.14903e-60	1	si:dkey-7j14.6
znf536	3.4827e-64	0.400979	0.647	0.427	5.71651e-60	1	znf536
zgc:174863	6.43005e-63	0.335884	0.915	0.864	1.05543e-58	1	zgc:174863
itga5	1.46809e-62	0.256552	0.362	0.142	2.40972e-58	1	itga5
hsp70l	1.64447e-62	0.817493	0.66	0.505	2.69923e-58	1	hsp70l
col4a5	4.32292e-62	0.342455	0.871	0.774	7.09564e-58	1	col4a5
pkma	1.94961e-61	0.390358	0.745	0.649	3.20009e-57	1	pkma
aqp12	4.01795e-61	0.245721	0.28	0.09	6.59507e-57	1	aqp12
slc35f2	1.99296e-60	0.516321	0.593	0.415	3.27125e-56	1	slc35f2
mhc2dab	9.85867e-60	0.37413	0.263	0.081	1.6182e-55	1	mhc2dab
pim1	1.90453e-59	0.621382	0.6	0.428	3.1261e-55	1	pim1
plk2b	2.39213e-59	0.200328	0.2	0.046	3.92644e-55	1	plk2b
UBB	6.29826e-59	0.750327	0.592	0.447	1.0338e-54	1	UBB
lama5	5.07219e-58	0.450204	0.683	0.543	8.32549e-54	1	lama5
foxo3b	6.43523e-57	0.207364	0.264	0.085	1.05628e-52	1	foxo3b
slc43a3b	5.16941e-56	0.456313	0.519	0.323	8.48508e-52	1	slc43a3b
si:ch211-250c4.4	5.92014e-56	0.278131	0.454	0.227	9.71731e-52	1	si:ch211-250c4.4
rtn4a	9.94853e-56	0.458103	0.594	0.441	1.63295e-51	1	rtn4a
ktn1	2.18083e-55	0.308227	0.423	0.211	3.57961e-51	1	ktn1
jdp2b	3.05833e-55	0.575919	0.743	0.577	5.01994e-51	1	jdp2b
bcam	1.78955e-54	0.324727	0.808	0.698	2.93738e-50	1	bcam
vegfaa	2.65752e-54	0.284039	0.486	0.263	4.36206e-50	1	vegfaa
CABZ01068358.1	2.97411e-54	0.38551	0.729	0.621	4.88171e-50	1	CABZ01068358.1
tmem176l.1	1.55987e-53	0.417625	0.621	0.47	2.56037e-49	1	tmem176l.1
si:dkey-16l2.20	4.58923e-53	0.350727	0.3	0.115	7.53276e-49	1	si:dkey-16l2.20
ptgs2a	1.0515e-52	0.290885	0.283	0.104	1.72594e-48	1	ptgs2a
msna	2.06195e-52	0.392342	0.696	0.604	3.38449e-48	1	msna
pcdh10a	3.70931e-52	0.16628	0.2	0.052	6.08846e-48	1	pcdh10a
hmgn3	7.25465e-52	0.296455	0.443	0.227	1.19078e-47	1	hmgn3
phlda21	1.04916e-51	0.547216	0.874	0.761	1.72209e-47	1	phlda2
itga9	1.44767e-51	0.28241	0.461	0.246	2.37621e-47	1	itga9
plekha6	2.76307e-51	0.278236	0.499	0.282	4.5353e-47	1	plekha6
anxa2a	1.63125e-49	0.559923	0.388	0.193	2.67753e-45	1	anxa2a
fosab	2.38427e-49	0.352227	0.979	0.944	3.91354e-45	1	fosab
cav2	9.03604e-48	0.245705	0.312	0.131	1.48318e-43	1	cav2
aif1l	6.41096e-47	0.412026	0.582	0.446	1.0523e-42	1	aif1l
aldh1a2	2.52574e-46	0.406661	0.638	0.489	4.14575e-42	1	aldh1a2
myl9a	2.36089e-45	0.300645	0.761	0.687	3.87516e-41	1	myl9a
fosb	3.40091e-45	0.329026	0.816	0.679	5.58225e-41	1	fosb
foxl2a	4.56561e-45	0.283052	0.446	0.254	7.49399e-41	1	foxl2a
fkbp1b	4.98879e-45	0.229678	0.423	0.211	8.18859e-41	1	fkbp1b
si:ch211-79k12.1	5.27352e-45	0.21945	0.301	0.124	8.65595e-41	1	si:ch211-79k12.1
pim2	7.38923e-45	0.491325	0.434	0.27	1.21287e-40	1	pim2
rftn2	1.77935e-43	0.240398	0.378	0.191	2.92063e-39	1	rftn2
cebpb	2.95101e-43	0.737715	0.507	0.341	4.84379e-39	1	cebpb
pdlim2	3.00774e-43	0.220393	0.206	0.067	4.93691e-39	1	pdlim2
bmpr2a	5.54311e-43	0.292844	0.798	0.693	9.09847e-39	1	bmpr2a
adamts2	3.60276e-42	0.216057	0.353	0.171	5.91357e-38	1	adamts2
nrp2a	3.8487e-42	0.267554	0.623	0.441	6.31726e-38	1	nrp2a
ppl	4.55121e-42	0.324902	0.493	0.305	7.47035e-38	1	ppl
gpc1a	9.22475e-42	0.135281	0.181	0.053	1.51415e-37	1	gpc1a
tpm4a	4.18813e-41	0.368187	0.602	0.476	6.8744e-37	1	tpm4a
nid1a	7.14964e-41	0.190408	0.23	0.085	1.17354e-36	1	nid1a
mycb	4.25967e-40	0.518791	0.85	0.817	6.99182e-36	1	mycb
znf609b	8.45592e-40	0.271988	0.519	0.343	1.38795e-35	1	znf609b
trpm6	9.41775e-40	0.145095	0.174	0.051	1.54583e-35	1	trpm6
creb3l3l	1.23715e-39	0.264323	0.456	0.277	2.03066e-35	1	creb3l3l
notch3	5.63506e-39	0.211661	0.992	0.92	9.2494e-35	1	notch3
vat1	4.13869e-38	0.361847	0.34	0.178	6.79324e-34	1	vat1
gapdhs	2.35662e-37	0.231621	0.853	0.826	3.86815e-33	1	gapdhs
s100v2	3.73734e-37	0.337427	0.504	0.329	6.13447e-33	1	s100v2
dap1b	4.20832e-37	0.212865	0.994	0.951	6.90754e-33	1	dap1b
cemip	8.59706e-37	0.141405	0.165	0.05	1.41112e-32	1	cemip
rapgef2	1.15063e-36	0.232704	0.375	0.205	1.88865e-32	1	rapgef2
ptmaa	1.31181e-36	0.338033	0.717	0.609	2.15321e-32	1	ptmaa
chka	2.22359e-36	0.301892	0.722	0.683	3.64979e-32	1	chka
col16a1	1.5927e-35	0.17263	0.287	0.132	2.61425e-31	1	col16a1
s100a10b	1.79029e-35	0.108539	0.522	0.303	2.93858e-31	1	s100a10b
plekho1b	3.44715e-34	0.154309	0.282	0.13	5.65815e-30	1	plekho1b
pros1	2.05937e-33	0.269241	0.167	0.058	3.38025e-29	1	pros1
nrg2a	7.27003e-33	0.148852	0.238	0.102	1.1933e-28	1	nrg2a
bmp4	5.34646e-32	0.175983	0.281	0.136	8.77567e-28	1	bmp4
itm2ba	7.96414e-32	0.250044	0.778	0.777	1.30723e-27	1	itm2ba
capn2a	8.70094e-32	0.195917	0.358	0.197	1.42817e-27	1	capn2a
ecrg4a	9.28255e-32	0.263959	0.257	0.118	1.52364e-27	1	ecrg4a
tead1b	1.01568e-31	0.224388	0.404	0.24	1.66713e-27	1	tead1b
c7a	1.22481e-31	0.115629	0.118	0.03	2.0104e-27	1	c7a
cd164	1.39048e-31	0.310073	0.405	0.26	2.28233e-27	1	cd164
arl8ba	3.86306e-31	0.18096	0.304	0.155	6.34082e-27	1	arl8ba
ampd2b	4.76491e-31	0.205896	0.478	0.308	7.82112e-27	1	ampd2b
itga1	5.2103e-31	0.107934	0.144	0.044	8.55219e-27	1	itga1
si:busm1-57f23.1	5.96935e-31	0.420207	0.322	0.175	9.79809e-27	1	si:busm1-57f23.1
ptn	1.71607e-30	0.145786	0.171	0.061	2.81676e-26	1	ptn
mcl1a	1.75233e-30	0.475131	0.757	0.7	2.87627e-26	1	mcl1a
junba	2.04707e-30	0.347422	0.88	0.808	3.36007e-26	1	junba
nccrp1	7.64722e-30	0.432186	0.321	0.197	1.25521e-25	1	nccrp1
f3b	7.9768e-30	0.56765	0.577	0.464	1.30931e-25	1	f3b
hs3st3b1b	1.27507e-29	0.331875	0.388	0.254	2.09289e-25	1	hs3st3b1b
si:ch211-137i24.10	1.29889e-29	0.264297	0.289	0.143	2.132e-25	1	si:ch211-137i24.10
si:ch211-163l21.7	4.22726e-29	0.109839	0.122	0.034	6.93863e-25	1	si:ch211-163l21.7
id3	8.98972e-29	0.448171	0.571	0.461	1.47557e-24	1	id3
tagln2	1.35107e-28	0.367289	0.394	0.267	2.21764e-24	1	tagln2
si:dkey-74k8.3	1.76889e-28	0.187145	0.328	0.182	2.90345e-24	1	si:dkey-74k8.3
gmps	4.78571e-28	0.191105	0.888	0.827	7.85527e-24	1	gmps
hspe1	6.3769e-28	0.270796	0.782	0.747	1.04671e-23	1	hspe1
jcada	6.53871e-28	0.190485	0.394	0.241	1.07326e-23	1	jcada
schip1	6.65704e-28	0.228006	0.511	0.367	1.09269e-23	1	schip1
eif4ebp3l	1.03983e-27	0.333777	0.46	0.343	1.70678e-23	1	eif4ebp3l
gstm.1	1.27978e-27	0.337686	0.612	0.571	2.10063e-23	1	gstm.1
rpz3	2.00145e-27	0.148873	0.283	0.146	3.28519e-23	1	rpz3
plekhg4	3.70805e-27	0.296817	0.566	0.462	6.0864e-23	1	plekhg4
entpd1	3.82469e-27	0.145722	0.15	0.053	6.27785e-23	1	entpd1
si:dkey-73n10.1	4.4472e-27	0.379667	0.468	0.363	7.29964e-23	1	si:dkey-73n10.1
gabarapb	7.07849e-27	0.190119	0.844	0.85	1.16186e-22	1	gabarapb
srpra	8.45057e-27	0.211759	0.827	0.798	1.38708e-22	1	srpra
amotl2b	1.36396e-26	0.447867	0.335	0.217	2.2388e-22	1	amotl2b
dhrs13l1	1.92685e-26	0.169627	0.326	0.182	3.16273e-22	1	dhrs13l1
ubb	2.97925e-26	0.467095	0.626	0.54	4.89015e-22	1	ubb
sept9a	3.20942e-26	0.334697	0.494	0.399	5.26794e-22	1	sept9a
tcf3b	3.30712e-26	0.182183	0.333	0.194	5.42831e-22	1	tcf3b
dpp7	7.48393e-26	0.183849	0.364	0.221	1.22841e-21	1	dpp7
phldb2b	7.89208e-26	0.151439	0.263	0.134	1.29541e-21	1	phldb2b
edem1	1.32792e-25	0.220346	0.372	0.234	2.17964e-21	1	edem1
antxr2a	2.36548e-25	0.139368	0.24	0.119	3.8827e-21	1	antxr2a
tspan4a	3.9267e-25	0.232944	0.323	0.192	6.44529e-21	1	tspan4a
mhc1zba	7.38225e-25	0.234168	0.774	0.75	1.21172e-20	1	mhc1zba
tbc1d16	8.21041e-25	0.112943	0.178	0.074	1.34766e-20	1	tbc1d16
sync	1.04922e-24	0.119428	0.165	0.067	1.72218e-20	1	sync
rhoab	3.1529e-24	0.387672	0.294	0.181	5.17517e-20	1	rhoab
ccdc3a	5.38926e-24	0.201123	0.432	0.29	8.84592e-20	1	ccdc3a
gbp1	7.6638e-24	0.196662	0.213	0.102	1.25794e-19	1	gbp1
errfi1a	1.18673e-23	0.245796	0.386	0.252	1.94791e-19	1	errfi1a
map7d1a	1.28809e-23	0.180377	0.357	0.223	2.11427e-19	1	map7d1a
irf2bpl	2.04233e-23	0.234059	0.333	0.204	3.35227e-19	1	irf2bpl
tuba8l4	2.27937e-23	0.410796	0.483	0.4	3.74136e-19	1	tuba8l4
srpk1a	2.34712e-23	0.165309	0.408	0.267	3.85257e-19	1	srpk1a
myh10	3.68428e-23	0.23883	0.438	0.309	6.04738e-19	1	myh10
cdc14ab	3.94916e-23	0.123317	0.224	0.11	6.48215e-19	1	cdc14ab
rhoq	4.84344e-23	0.186362	0.382	0.248	7.95003e-19	1	rhoq
calm1a	6.51812e-23	0.311324	0.493	0.396	1.06988e-18	1	calm1a
emx2	1.04597e-22	0.287319	0.598	0.538	1.71686e-18	1	emx2
tnfrsf19	2.77098e-22	0.178702	0.225	0.116	4.54828e-18	1	tnfrsf19
tuft1a	5.58388e-22	0.135131	0.207	0.1	9.16538e-18	1	tuft1a
selenop	6.58012e-22	0.153203	0.955	0.938	1.08006e-17	1	selenop
b2ml	2.59977e-21	0.161693	0.949	0.944	4.26726e-17	1	b2ml
sult1st6	2.80579e-21	0.154606	0.237	0.126	4.60542e-17	1	sult1st6
metrn	3.83975e-21	0.266882	0.571	0.502	6.30257e-17	1	metrn
si:dkeyp-72g9.4	6.65704e-21	0.106121	0.149	0.062	1.09269e-16	1	si:dkeyp-72g9.4
gulp1a	9.32374e-21	0.143418	0.315	0.19	1.5304e-16	1	gulp1a
olfml3b	1.09415e-20	0.114074	0.204	0.102	1.79594e-16	1	olfml3b
ackr4b	2.10152e-20	0.243701	0.627	0.566	3.44943e-16	1	ackr4b
nos1apa.1	4.21375e-20	0.175623	0.417	0.293	6.91644e-16	1	nos1apa.1
id1	4.99739e-20	0.431667	0.509	0.416	8.20271e-16	1	id1
ddit3	7.70191e-20	0.397128	0.602	0.538	1.26419e-15	1	ddit3
dhrs3b	9.00192e-20	0.120226	0.158	0.07	1.47757e-15	1	dhrs3b
ctsh	9.00646e-20	0.154565	0.293	0.176	1.47832e-15	1	ctsh
csrnp1b	9.55828e-20	0.160306	0.251	0.143	1.5689e-15	1	csrnp1b
CABZ01068367.1	1.1461e-19	0.192614	0.472	0.355	1.8812e-15	1	CABZ01068367.1
ppp1r9alb	1.15418e-19	0.174606	0.36	0.239	1.89447e-15	1	ppp1r9alb
zgc:195173	2.5497e-19	0.125977	0.287	0.167	4.18507e-15	1	zgc:195173
rarres3l	2.68153e-19	0.144567	0.144	0.062	4.40146e-15	1	rarres3l
ccdc80	5.26056e-19	0.208905	0.314	0.203	8.63468e-15	1	ccdc80
atp1a1a.1	6.92973e-19	0.162851	0.851	0.795	1.13745e-14	1	atp1a1a.1
selenbp1	9.57109e-19	0.122286	0.122	0.049	1.571e-14	1	selenbp1
selenof	1.11056e-18	0.268733	0.525	0.474	1.82288e-14	1	selenof
insig1	2.00712e-18	0.207563	0.219	0.122	3.29449e-14	1	insig1
slit2	2.04788e-18	0.219421	0.577	0.486	3.36139e-14	1	slit2
tob1b	2.58752e-18	0.287983	0.585	0.539	4.24715e-14	1	tob1b
dock9b	2.63474e-18	0.171224	0.442	0.32	4.32467e-14	1	dock9b
ppp1cb	7.24096e-18	0.279272	0.432	0.362	1.18853e-13	1	ppp1cb
emilin2b	9.06993e-18	0.11619	0.179	0.089	1.48874e-13	1	emilin2b
sdc4	1.0737e-17	0.344832	0.622	0.559	1.76237e-13	1	sdc4
zgc:110158	1.31763e-17	0.126176	0.242	0.14	2.16276e-13	1	zgc:110158
bag3	2.41027e-17	0.190348	0.202	0.11	3.95621e-13	1	bag3
dusp1	2.54084e-17	0.419004	0.373	0.292	4.17054e-13	1	dusp1
dsc2l	2.60408e-17	0.18143	0.392	0.277	4.27433e-13	1	dsc2l
slc7a10a	4.79147e-17	0.30419	0.533	0.482	7.86472e-13	1	slc7a10a
glulb	5.52831e-17	0.154382	0.995	0.944	9.07417e-13	1	glulb
sema3ab	5.93861e-17	0.130907	0.266	0.162	9.74763e-13	1	sema3ab
si:ch211-132p1.3	6.93749e-17	0.352768	0.279	0.184	1.13872e-12	1	si:ch211-132p1.3
ezh1	1.35333e-16	0.117037	0.24	0.141	2.22136e-12	1	ezh1
ubc	1.46942e-16	0.21102	0.702	0.711	2.41191e-12	1	ubc
pbxip1a	1.60806e-16	0.110762	0.264	0.16	2.63947e-12	1	pbxip1a
dnajb1b	1.708e-16	0.314861	0.652	0.612	2.80351e-12	1	dnajb1b
slc4a2a	2.22162e-16	0.122716	0.244	0.145	3.64656e-12	1	slc4a2a
pgm2	2.47897e-16	0.213131	0.51	0.415	4.06898e-12	1	pgm2
si:dkey-56m19.5	2.82123e-16	0.142156	0.158	0.078	4.63076e-12	1	si:dkey-56m19.5
cavin2b	2.85933e-16	0.257784	0.542	0.477	4.6933e-12	1	cavin2b
nrarpa	3.33151e-16	0.201186	0.773	0.744	5.46835e-12	1	nrarpa
reep5	4.34733e-16	0.275377	0.437	0.369	7.13571e-12	1	reep5
il11ra	5.11296e-16	0.149645	0.391	0.278	8.39241e-12	1	il11ra
btg21	5.28454e-16	0.215326	0.951	0.907	8.67404e-12	1	btg2
rnd3a	5.72245e-16	0.113381	0.214	0.121	9.39283e-12	1	rnd3a
selenow1	6.01429e-16	0.236708	0.589	0.575	9.87186e-12	1	selenow1
hdac4	6.38979e-16	0.111063	0.223	0.129	1.04882e-11	1	hdac4
rpz5	6.6874e-16	0.145389	0.938	0.959	1.09767e-11	1	rpz5
ctsba	7.14061e-16	0.385117	0.246	0.165	1.17206e-11	1	ctsba
cebpd	7.18942e-16	0.324786	0.569	0.522	1.18007e-11	1	cebpd
cd81a	8.45494e-16	0.181312	0.795	0.803	1.38779e-11	1	cd81a
atp1b3a	1.28263e-15	0.125255	0.251	0.154	2.1053e-11	1	atp1b3a
tp53i11b	1.63752e-15	0.121199	0.324	0.213	2.68783e-11	1	tp53i11b
si:ch211-195b13.1	1.66077e-15	0.100594	0.09	0.033	2.72599e-11	1	si:ch211-195b13.1
sgce	1.87934e-15	0.111589	0.275	0.172	3.08476e-11	1	sgce
si:ch211-15b10.6	2.17513e-15	0.222139	0.24	0.149	3.57026e-11	1	si:ch211-15b10.6
aldocb	2.31101e-15	0.117042	0.275	0.173	3.79329e-11	1	aldocb
ppp1r1b	2.6573e-15	0.142632	0.326	0.22	4.36169e-11	1	ppp1r1b
PDE3B	3.63092e-15	0.141209	0.381	0.272	5.95979e-11	1	PDE3B
tmem106ba	5.38274e-15	0.116615	0.251	0.154	8.83523e-11	1	tmem106ba
pik3r3b	9.72725e-15	0.153476	0.24	0.149	1.59663e-10	1	pik3r3b
vasnb	1.64734e-14	0.177732	0.492	0.386	2.70394e-10	1	vasnb
zgc:162396	1.901e-14	0.101086	0.212	0.124	3.1203e-10	1	zgc:162396
irf1b	1.95926e-14	0.313621	0.196	0.116	3.21593e-10	1	irf1b
ly6m3	2.79801e-14	0.211834	0.105	0.045	4.59265e-10	1	ly6m3
amotl2a	4.29509e-14	0.264765	0.292	0.211	7.04996e-10	1	amotl2a
pmp22a	4.67243e-14	0.234351	0.302	0.217	7.66933e-10	1	pmp22a
tln1	5.04185e-14	0.245612	0.42	0.358	8.27569e-10	1	tln1
mt2	5.97494e-14	0.619638	0.131	0.065	9.80726e-10	1	mt2
letm2	8.59676e-14	0.126783	0.338	0.236	1.41107e-09	1	letm2
plk3	1.12595e-13	0.234579	0.212	0.137	1.84814e-09	1	plk3
ifi35	2.5407e-13	0.136952	0.344	0.245	4.17031e-09	1	ifi35
map1aa	2.75911e-13	0.130823	0.273	0.18	4.52881e-09	1	map1aa
spry2	3.24977e-13	0.232409	0.317	0.238	5.33417e-09	1	spry2
pmp22b	3.89183e-13	0.270977	0.324	0.253	6.38806e-09	1	pmp22b
fndc3ba	3.96466e-13	0.134972	0.406	0.303	6.5076e-09	1	fndc3ba
hsp90aa1.2	7.94065e-13	0.409756	0.615	0.573	1.30338e-08	1	hsp90aa1.2
cd63	1.21711e-12	0.226973	0.396	0.322	1.99776e-08	1	cd63
hspb1	1.88127e-12	0.407807	0.602	0.569	3.08792e-08	1	hspb1
BX284696.1	1.98566e-12	0.3588	0.319	0.243	3.25927e-08	1	BX284696.1
cox4i2	2.99227e-12	0.259872	0.402	0.349	4.91151e-08	1	cox4i2
ehd1b	3.55839e-12	0.133759	0.141	0.075	5.84074e-08	1	ehd1b
fosl1a	3.87251e-12	0.288205	0.626	0.588	6.35633e-08	1	fosl1a
robo1	4.60496e-12	0.1521	0.439	0.349	7.55858e-08	1	robo1
lrrc1	7.40804e-12	0.100876	0.303	0.21	1.21595e-07	1	lrrc1
cdh1	7.76825e-12	0.117379	0.911	0.888	1.27508e-07	1	cdh1
si:ch73-335l21.4	1.09491e-11	0.300635	0.372	0.287	1.79719e-07	1	si:ch73-335l21.4
igf2b	1.51043e-11	0.241451	0.327	0.243	2.47922e-07	1	igf2b
si:dkey-241l7.2	1.74594e-11	0.526753	0.085	0.037	2.86579e-07	1	si:dkey-241l7.2
gmnn	2.49878e-11	0.183865	0.688	0.69	4.1015e-07	1	gmnn
ctsa	2.55116e-11	0.237954	0.34	0.283	4.18748e-07	1	ctsa
sox11a	2.62523e-11	0.110758	0.226	0.145	4.30905e-07	1	sox11a
nucb2a	4.93566e-11	0.11562	0.332	0.245	8.10139e-07	1	nucb2a
mmp14a	8.47284e-11	0.14359	0.316	0.234	1.39073e-06	1	mmp14a
gyg1a	1.02348e-10	0.277456	0.141	0.082	1.67994e-06	1	gyg1a
zgc:123010	1.06114e-10	0.126598	0.378	0.289	1.74175e-06	1	zgc:123010
col12a1a	1.07047e-10	0.11767	0.188	0.117	1.75707e-06	1	col12a1a
si:ch211-132b12.7	1.39364e-10	0.133088	0.278	0.198	2.28753e-06	1	si:ch211-132b12.7
ppp1r15a	1.90224e-10	0.150487	0.263	0.185	3.12233e-06	1	ppp1r15a
hipk3a	2.12904e-10	0.10487	0.344	0.258	3.49461e-06	1	hipk3a
lsp1	3.1507e-10	0.111825	0.264	0.186	5.17156e-06	1	lsp1
ctsla1	3.18522e-10	0.166851	0.749	0.755	5.22823e-06	1	ctsla
cnn3a	3.20603e-10	0.180804	0.2	0.136	5.26238e-06	1	cnn3a
slc25a33	3.21944e-10	0.130996	0.122	0.068	5.2844e-06	1	slc25a33
notch1b	4.23754e-10	0.125887	0.395	0.309	6.9555e-06	1	notch1b
cavin1b	4.56137e-10	0.114941	0.271	0.188	7.48703e-06	1	cavin1b
slc38a2	5.91692e-10	0.23634	0.474	0.457	9.71203e-06	1	slc38a2
si:ch211-213a13.1	8.18454e-10	0.10785	0.154	0.092	1.34341e-05	1	si:ch211-213a13.1
cfl1	9.3641e-10	0.130875	0.829	0.835	1.53702e-05	1	cfl1
sb:cb81	1.39262e-09	0.196544	0.464	0.41	2.28585e-05	1	sb:cb81
ccn1	1.47726e-09	0.277984	0.217	0.15	2.42478e-05	1	ccn1
proza	1.48011e-09	0.109973	0.336	0.256	2.42945e-05	1	proza
2020-09-10	1.90673e-09	0.220722	0.359	0.309	3.12971e-05	1	2020-09-10
il15	1.94167e-09	0.13324	0.113	0.063	3.18706e-05	1	il15
timp2b	1.95767e-09	0.155491	0.371	0.296	3.21332e-05	1	timp2b
myl12.1	2.76727e-09	0.120856	0.763	0.788	4.54219e-05	1	myl12.1
serinc1	3.42711e-09	0.209507	0.376	0.333	5.62527e-05	1	serinc1
rcan1a	3.46862e-09	0.10237	0.19	0.124	5.69339e-05	1	rcan1a
ifi46	3.47955e-09	0.190107	0.637	0.605	5.71133e-05	1	ifi46
arhgef18a	3.92464e-09	0.104592	0.31	0.232	6.44191e-05	1	arhgef18a
wnt4a	4.42599e-09	0.209759	0.558	0.552	7.26482e-05	1	wnt4a
pnrc2	5.40546e-09	0.160493	0.835	0.836	8.87252e-05	1	pnrc2
sav1	8.51849e-09	0.168098	0.231	0.17	0.000139823	1	sav1
eif1b	8.88052e-09	0.109415	0.814	0.843	0.000145765	1	eif1b
capns1a	9.75396e-09	0.196195	0.313	0.26	0.000160101	1	capns1a
ctsd	1.02525e-08	0.206143	0.31	0.256	0.000168284	1	ctsd
ppp1r14bb	1.05192e-08	0.18957	0.329	0.274	0.000172662	1	ppp1r14bb
bhlhe40	1.23592e-08	0.24396	0.603	0.609	0.000202864	1	bhlhe40
wnt9b	1.73225e-08	0.110481	0.371	0.295	0.000284331	1	wnt9b
ctsf	2.07e-08	0.100541	0.3	0.227	0.00033977	1	ctsf
enc1	2.17978e-08	0.168737	0.494	0.447	0.000357788	1	enc1
hvcn1	2.20216e-08	0.11809	0.306	0.236	0.000361462	1	hvcn1
ccnl1a	2.65298e-08	0.140911	0.324	0.253	0.000435461	1	ccnl1a
map1lc3a	2.82662e-08	0.181161	0.389	0.34	0.000463961	1	map1lc3a
zbtb16a	3.22519e-08	0.112371	0.238	0.171	0.000529382	1	zbtb16a
emp2	3.32069e-08	0.107599	0.366	0.292	0.000545057	1	emp2
npc2	3.45061e-08	0.196418	0.417	0.378	0.000566383	1	npc2
fam120a	4.74506e-08	0.158725	0.502	0.454	0.000778854	1	fam120a
isg15	6.12138e-08	0.37742	0.389	0.335	0.00100476	1	isg15
lims1	1.10859e-07	0.122928	0.362	0.299	0.00181965	1	lims1
bcl2a	1.21619e-07	0.104263	0.336	0.266	0.00199626	1	bcl2a
add3a	1.74878e-07	0.14486	0.42	0.362	0.00287045	1	add3a
atf4b1	2.31368e-07	0.122383	0.795	0.794	0.00379768	1	atf4b
chac11	2.48077e-07	0.255622	0.558	0.563	0.00407194	1	chac1
tjp1a	2.91402e-07	0.132451	0.429	0.377	0.00478307	1	tjp1a
tubb4b	3.09267e-07	0.174664	0.583	0.592	0.0050763	1	tubb4b
pam	3.14183e-07	0.106558	0.346	0.28	0.005157	1	pam
ptp4a2b	3.32106e-07	0.188944	0.451	0.429	0.00545119	1	ptp4a2b
ppargc1b	3.33632e-07	0.157791	0.479	0.434	0.00547624	1	ppargc1b
si:ch211-240l19.5	6.3007e-07	0.173514	0.384	0.324	0.010342	1	si:ch211-240l19.5
mapre3b	7.21642e-07	0.104143	0.389	0.326	0.011845	1	mapre3b
ptprfb	8.19435e-07	0.1305	0.636	0.662	0.0134502	1	ptprfb
appb	8.44034e-07	0.179816	0.29	0.247	0.013854	1	appb
fuca2	1.39651e-06	0.103655	0.192	0.14	0.0229223	1	fuca2
rps6ka1	1.66972e-06	0.101139	0.286	0.225	0.0274068	1	rps6ka1
si:dkey-23i12.7	1.82646e-06	0.218226	0.158	0.109	0.0299795	1	si:dkey-23i12.7
CU861453.1	1.84608e-06	0.112939	0.231	0.176	0.0303015	1	CU861453.1
f10	2.07909e-06	0.105027	0.34	0.277	0.0341262	1	f10
cnn2	2.27054e-06	0.21134	0.381	0.356	0.0372686	1	cnn2
lgals3b	2.52674e-06	0.193718	0.451	0.45	0.0414739	1	lgals3b
greb1	2.53112e-06	0.168481	0.428	0.413	0.0415458	1	greb1
gnb1b	3.16481e-06	0.138151	0.614	0.656	0.0519472	1	gnb1b
zgc:171750	3.28659e-06	0.127408	0.071	0.039	0.053946	1	zgc:171750
myl9b	5.53503e-06	0.171343	0.293	0.254	0.090852	1	myl9b
hsd3b7	5.8005e-06	0.103239	0.094	0.059	0.0952094	1	hsd3b7
ndfip1	6.60755e-06	0.158878	0.417	0.401	0.108456	1	ndfip1
stat1a	7.11568e-06	0.167459	0.592	0.611	0.116797	1	stat1a
tmem59	8.17332e-06	0.158588	0.266	0.226	0.134157	1	tmem59
zp3a.1	8.60574e-06	0.164793	0.051	0.025	0.141255	1	zp3a.1
id2b	8.80818e-06	0.163317	0.16	0.116	0.144578	1	id2b
ndrg3b	1.17877e-05	0.116106	0.155	0.113	0.193483	1	ndrg3b
CABZ01073795.1	1.52198e-05	0.11207	0.126	0.084	0.249817	1	CABZ01073795.1
cst14a.2	1.57765e-05	0.172334	0.382	0.36	0.258956	1	cst14a.2
psme2	1.61178e-05	0.200241	0.237	0.195	0.264558	1	psme2
nhsl2	3.19621e-05	0.144202	0.44	0.413	0.524626	1	nhsl2
gstp1	3.45261e-05	0.158467	0.182	0.142	0.566711	1	gstp1
atp1b3b	4.03001e-05	0.165795	0.307	0.275	0.661486	1	atp1b3b
cldn5a	4.09088e-05	0.124454	0.26	0.207	0.671478	1	cldn5a
mpzl2b	4.33912e-05	0.179446	0.315	0.286	0.712223	1	mpzl2b
ppt1	5.08884e-05	0.155311	0.264	0.229	0.835282	1	ppt1
sqstm1	0.00109462	0.207108	0.17	0.144	1	1	sqstm1
dynll2b	0.00336681	0.192852	0.252	0.24	1	1	dynll2b
zgc:152652	0.000650453	0.191467	0.079	0.053	1	1	zgc:152652
cycsb	0.000600071	0.185284	0.304	0.286	1	1	cycsb
pfn2	8.26937e-05	0.184252	0.459	0.477	1	1	pfn2
cldnd	0.00180098	0.172011	0.071	0.049	1	1	cldnd
zp3.2	0.00962019	0.170219	0.054	0.038	1	1	zp3.2
qkia	0.00148016	0.165535	0.42	0.437	1	1	qkia
capza1a	6.37197e-05	0.163334	0.286	0.258	1	1	capza1a
zfp36l1b	0.00344742	0.158507	0.372	0.364	1	1	zfp36l1b
tob1a	0.000398564	0.149888	0.279	0.25	1	1	tob1a
tapbp.1	0.000287059	0.149202	0.225	0.192	1	1	tapbp.1
lgmn	0.000181528	0.141838	0.246	0.214	1	1	lgmn
zgc:114200	0.000179368	0.140634	0.244	0.21	1	1	zgc:114200
mphosph8	0.00680217	0.138259	0.438	0.457	1	1	mphosph8
ddt	0.00602961	0.137862	0.272	0.258	1	1	ddt
mych	0.000731971	0.137237	0.145	0.115	1	1	mych
capns1b	0.000316733	0.136746	0.318	0.296	1	1	capns1b
rnf19a	0.001133	0.130821	0.232	0.206	1	1	rnf19a
mgst1.2	9.40296e-05	0.130673	0.164	0.126	1	1	mgst1.2
cst3	0.00902958	0.128797	0.433	0.457	1	1	cst3
atp2b4	0.000914319	0.126749	0.248	0.219	1	1	atp2b4
ier2b1	0.00150976	0.125947	0.756	0.748	1	1	ier2b
pgrmc1	0.00643749	0.121304	0.483	0.521	1	1	pgrmc1
si:ch73-160p18.3	0.00190055	0.120019	0.071	0.049	1	1	si:ch73-160p18.3
bckdk	0.00393602	0.112582	0.249	0.227	1	1	bckdk
tspan18b	0.000113494	0.110481	0.183	0.144	1	1	tspan18b
ier2a1	0.00256717	0.109052	0.695	0.712	1	1	ier2a
notch2	0.00814042	0.1076	0.307	0.293	1	1	notch2
retsatl	0.000402688	0.106958	0.061	0.038	1	1	retsatl
gpx4a	0.00115486	0.102576	0.147	0.117	1	1	gpx4a

## Sheet: Pre-follicle (SC 3)
	p_val	avg_logFC	pct.1	pct.2	p_val_adj	cluster	gene
krt4	0	1.37577	0.458	0.003	0	3	krt4
nog3	0	0.716765	0.423	0.003	0	3	nog3
zgc:153311	0	1.28196	0.617	0.005	0	3	zgc:153311
gpm6ab	0	0.57479	0.396	0.005	0	3	gpm6ab
nog1	0	1.47186	0.535	0.006	0	3	nog1
ndrg1a	0	1.01504	0.443	0.006	0	3	ndrg1a
si:ch211-207d6.2	0	0.853358	0.628	0.009	0	3	si:ch211-207d6.2
tmeff1b	0	0.77189	0.542	0.011	0	3	tmeff1b
atoh8	0	0.627886	0.493	0.011	0	3	atoh8
fn1b	0	0.891781	0.438	0.011	0	3	fn1b
pcolceb	0	0.94921	0.487	0.013	0	3	pcolceb
afap1l1a	0	0.552196	0.463	0.015	0	3	afap1l1a
fgfr4	0	1.21965	0.608	0.016	0	3	fgfr4
slc4a4a	0	1.699	0.822	0.017	0	3	slc4a4a
icn	0	2.12687	0.791	0.017	0	3	icn
cfl1l	0	1.87988	0.749	0.018	0	3	cfl1l
irx3a	0	0.915251	0.67	0.018	0	3	irx3a
fgfr3	0	1.16792	0.628	0.018	0	3	fgfr3
lhx9	0	1.11142	0.672	0.02	0	3	lhx9
krt18b	0	1.31417	0.63	0.021	0	3	krt18b
irx5a	0	0.722092	0.606	0.021	0	3	irx5a
cdh4	0	1.12114	0.731	0.025	0	3	cdh4
ehd2b	0	1.15318	0.672	0.03	0	3	ehd2b
krt94	0	1.52202	0.692	0.032	0	3	krt94
si:dkey-188i13.6	0	1.12596	0.617	0.039	0	3	si:dkey-188i13.6
ackr3b	0	1.25147	0.725	0.042	0	3	ackr3b
emilin1a	0	1.04135	0.756	0.056	0	3	emilin1a
zgc:114181	0	1.42519	0.85	0.063	0	3	zgc:114181
cahz	0	1.63437	0.678	0.075	0	3	cahz
si:ch211-105c13.3	4.28033e-307	0.808807	0.491	0.021	7.02573e-303	3	si:ch211-105c13.3
nfkbiaa	5.49308e-303	1.53848	0.518	0.027	9.01635e-299	3	nfkbiaa
bnc2	1.13566e-302	0.65933	0.522	0.028	1.86408e-298	3	bnc2
ucmaa	1.93542e-289	0.698463	0.368	0.005	3.1768e-285	3	ucmaa
fzd10	1.52407e-285	0.463251	0.394	0.009	2.50161e-281	3	fzd10
si:ch211-222l21.1	7.90115e-284	1.55571	0.74	0.111	1.29689e-279	3	si:ch211-222l21.1
anxa1a	1.09598e-283	1.18836	0.513	0.032	1.79895e-279	3	anxa1a
dkk3b	6.98121e-279	0.745001	0.403	0.011	1.1459e-274	3	dkk3b
hpn	1.02677e-277	0.662893	0.568	0.045	1.68534e-273	3	hpn
cldnc	4.33515e-273	0.612804	0.43	0.016	7.11571e-269	3	cldnc
csf1a	4.4753e-267	0.527583	0.344	0.005	7.34576e-263	3	csf1a
s100a10b1	4.09929e-265	1.77629	0.943	0.304	6.72857e-261	3	s100a10b
id2a	2.78097e-259	1.40617	0.544	0.048	4.56468e-255	3	id2a
hbegfa	1.81674e-257	1.068	0.524	0.042	2.98199e-253	3	hbegfa
rab6ba	2.10852e-254	0.515144	0.412	0.017	3.46092e-250	3	rab6ba
si:ch211-1a19.3	2.14109e-254	0.991537	0.615	0.066	3.51438e-250	3	si:ch211-1a19.3
fat2	7.48741e-254	0.462539	0.337	0.006	1.22898e-249	3	fat2
fgfrl1a	3.33274e-249	0.450149	0.374	0.012	5.47036e-245	3	fgfrl1a
fstl3	2.26724e-241	1.16876	0.617	0.078	3.72145e-237	3	fstl3
ftr82	6.82124e-241	0.536896	0.441	0.026	1.11964e-236	3	ftr82
ccnd1	8.25241e-237	0.527403	0.445	0.028	1.35455e-232	3	ccnd1
arvcfb	6.5608e-236	0.403758	0.35	0.011	1.07689e-231	3	arvcfb
cotl1	4.32391e-235	0.679913	0.37	0.014	7.09726e-231	3	cotl1
camta1a	4.58281e-235	0.386825	0.302	0.004	7.52223e-231	3	camta1a
hsbp1a	2.12188e-232	0.834067	0.621	0.085	3.48286e-228	3	hsbp1a
ace	1.57123e-229	0.469647	0.377	0.016	2.57902e-225	3	ace
CU468917.1	5.10597e-229	0.570319	0.392	0.02	8.38094e-225	3	CU468917.1
fgl2a	3.31671e-227	0.497465	0.396	0.02	5.44405e-223	3	fgl2a
mxra8a	1.44992e-224	0.704202	0.511	0.051	2.37989e-220	3	mxra8a
midn	2.63314e-220	1.48516	0.601	0.087	4.32204e-216	3	midn
ppdpfb	1.26466e-218	1.27655	0.692	0.133	2.07582e-214	3	ppdpfb
nat8l	9.39331e-218	0.629398	0.388	0.021	1.54182e-213	3	nat8l
kctd12.2	3.34442e-217	0.94045	0.612	0.091	5.48954e-213	3	kctd12.2
neurl1ab	6.66235e-215	0.363896	0.335	0.012	1.09356e-210	3	neurl1ab
fam84a	4.04489e-214	0.554763	0.405	0.026	6.63928e-210	3	fam84a
si:ch211-207i1.2	8.87714e-211	0.372205	0.322	0.011	1.45709e-206	3	si:ch211-207i1.2
spaca4l	2.42638e-209	0.5187	0.264	0.003	3.98266e-205	3	spaca4l
cav1	4.22515e-209	0.875112	0.648	0.111	6.93517e-205	3	cav1
ahnak	2.48428e-208	1.33401	0.841	0.256	4.0777e-204	3	ahnak
si:ch211-137i24.101	2.44189e-207	0.934581	0.705	0.128	4.00812e-203	3	si:ch211-137i24.10
fhl1b	2.17028e-203	0.476282	0.357	0.018	3.56229e-199	3	fhl1b
alkbh3.1	7.20735e-201	0.475283	0.293	0.008	1.18301e-196	3	alkbh3.1
neurl1b	2.10205e-199	0.279973	0.26	0.004	3.4503e-195	3	neurl1b
rasl11a	5.58873e-198	0.290236	0.267	0.005	9.17335e-194	3	rasl11a
epcam	6.70764e-196	1.15614	0.385	0.026	1.10099e-191	3	epcam
tdrd1	2.45131e-194	0.534539	0.258	0.004	4.02358e-190	3	tdrd1
cxcl20	9.34836e-190	0.392607	0.267	0.006	1.53444e-185	3	cxcl20
fxyd1	2.07696e-189	0.562605	0.39	0.03	3.40912e-185	3	fxyd1
bmp6	6.22307e-188	0.51364	0.352	0.021	1.02146e-183	3	bmp6
inka1a	8.62515e-188	0.360889	0.273	0.007	1.41573e-183	3	inka1a
kcnip1b	2.0497e-184	0.279717	0.247	0.004	3.36438e-180	3	kcnip1b
ccn2a	4.0574e-182	1.1136	0.337	0.02	6.65981e-178	3	ccn2a
tmem98	3.56798e-180	0.336552	0.289	0.011	5.85648e-176	3	tmem98
sox6	2.83931e-173	0.661727	0.485	0.066	4.66044e-169	3	sox6
col14a1a	5.37529e-172	0.275754	0.22	0.003	8.823e-168	3	col14a1a
col27a1b	9.84686e-172	0.360588	0.326	0.02	1.61626e-167	3	col27a1b
ctsk	1.75666e-170	0.486724	0.489	0.064	2.88338e-166	3	ctsk
gstm.3	3.09564e-170	1.12594	0.531	0.083	5.08118e-166	3	gstm.3
si:ch211-66e2.3	2.1212e-168	0.364461	0.236	0.005	3.48173e-164	3	si:ch211-66e2.3
tcima	9.64485e-168	0.777926	0.251	0.007	1.58311e-163	3	tcima
col6a1	1.56248e-165	0.55985	0.264	0.01	2.56466e-161	3	col6a1
tnfrsf9a	1.81448e-165	0.609471	0.284	0.014	2.97829e-161	3	tnfrsf9a
nr5a1b	1.01721e-162	0.319101	0.271	0.012	1.66965e-158	3	nr5a1b
rbpms2a	8.85984e-161	0.409871	0.275	0.013	1.45425e-156	3	rbpms2a
serpinf1	1.042e-160	0.363541	0.33	0.024	1.71035e-156	3	serpinf1
jam2b	4.93652e-159	0.480523	0.253	0.009	8.1028e-155	3	jam2b
pcp4l1	1.00624e-158	0.279708	0.236	0.007	1.65164e-154	3	pcp4l1
sik1	1.17323e-158	0.812842	0.535	0.094	1.92575e-154	3	sik1
txn	7.19974e-157	0.413663	0.289	0.016	1.18176e-152	3	txn
hoxb7a	7.77866e-157	0.229615	0.227	0.006	1.27679e-152	3	hoxb7a
sox4a.1	7.85514e-157	0.606315	0.295	0.018	1.28934e-152	3	sox4a.1
cxcl18b	4.40025e-155	1.60091	0.526	0.094	7.22257e-151	3	cxcl18b
ch25h	1.10606e-153	0.928703	0.313	0.023	1.81548e-149	3	ch25h
rassf7b	1.22316e-152	0.217675	0.198	0.003	2.00769e-148	3	rassf7b
zgc:92818	2.10868e-152	0.491097	0.306	0.021	3.46119e-148	3	zgc:92818
zgc:171686	3.09602e-149	0.209069	0.178	0.001	5.08181e-145	3	zgc:171686
hoxb3a	1.78715e-148	0.24467	0.251	0.011	2.93343e-144	3	hoxb3a
zgc:110182	1.29082e-146	0.844996	0.52	0.098	2.11876e-142	3	zgc:110182
fras1	2.70609e-144	0.267225	0.256	0.013	4.44177e-140	3	fras1
nanos1	5.40499e-141	0.739634	0.57	0.128	8.87175e-137	3	nanos1
dchs1a	1.69835e-140	0.345573	0.328	0.03	2.78768e-136	3	dchs1a
ablim1b	6.32997e-139	0.243798	0.227	0.009	1.039e-134	3	ablim1b
fkbp1b1	1.98329e-138	0.706022	0.722	0.225	3.25537e-134	3	fkbp1b
elovl1b	1.04656e-136	0.527031	0.401	0.053	1.71782e-132	3	elovl1b
si:ch73-335l21.41	2.14259e-135	1.59222	0.756	0.262	3.51684e-131	3	si:ch73-335l21.4
flt4	3.29108e-135	0.178286	0.17	0.002	5.40198e-131	3	flt4
spint1a	1.29035e-133	0.272953	0.196	0.005	2.11798e-129	3	spint1a
lurap1	8.12783e-133	0.226007	0.236	0.012	1.3341e-128	3	lurap1
krt81	2.21775e-132	0.813027	1	0.909	3.64021e-128	3	krt8
frzb	5.16068e-132	0.264061	0.2	0.006	8.47075e-128	3	frzb
shdb	1.59249e-131	0.28285	0.214	0.008	2.61392e-127	3	shdb
CABZ01073795.11	2.48897e-129	0.751438	0.412	0.06	4.08539e-125	3	CABZ01073795.1
tenm3	2.61005e-129	0.37674	0.357	0.043	4.28414e-125	3	tenm3
p3h2	8.46727e-129	0.213092	0.192	0.005	1.38982e-124	3	p3h2
si:dkey-28b4.7	2.91474e-128	0.661022	0.452	0.08	4.78426e-124	3	si:dkey-28b4.7
c1qtnf12	3.04889e-128	0.174808	0.152	0.001	5.00445e-124	3	c1qtnf12
ca16b	5.45796e-127	0.230283	0.209	0.008	8.95869e-123	3	ca16b
hspb8	3.02998e-126	0.261915	0.244	0.015	4.97342e-122	3	hspb8
gcga	7.52798e-126	0.503171	0.165	0.002	1.23564e-121	3	gcga
hbegfb	8.29443e-126	0.235782	0.198	0.007	1.36145e-121	3	hbegfb
CABZ01092746.1	6.72692e-125	0.253494	0.2	0.007	1.10416e-120	3	CABZ01092746.1
zgc:152791	9.54013e-125	1.12965	0.714	0.237	1.56592e-120	3	zgc:152791
anxa3b	3.26442e-123	0.519296	0.412	0.063	5.35821e-119	3	anxa3b
grhl1	2.27911e-122	0.251209	0.244	0.016	3.74093e-118	3	grhl1
six2a	1.26398e-121	0.200365	0.174	0.004	2.0747e-117	3	six2a
cyp26a1	4.27814e-121	0.516802	0.26	0.021	7.02214e-117	3	cyp26a1
foxj1a	5.2461e-121	0.375514	0.17	0.004	8.61095e-117	3	foxj1a
lrrn1	1.07134e-120	0.249595	0.207	0.01	1.7585e-116	3	lrrn1
negr1	2.45398e-120	0.152121	0.145	0.001	4.02796e-116	3	negr1
krt15	6.33091e-120	0.57678	0.251	0.018	1.03916e-115	3	krt15
ms4a17a.5	3.12934e-119	0.259299	0.262	0.021	5.1365e-115	3	ms4a17a.5
nkd1	1.30713e-118	0.529378	0.469	0.095	2.14552e-114	3	nkd1
arhgdig	3.2271e-118	0.379867	0.289	0.028	5.29696e-114	3	arhgdig
anxa2a1	1.06846e-117	0.947684	0.685	0.203	1.75378e-113	3	anxa2a
hoxb5a	1.7061e-116	0.179141	0.172	0.005	2.80039e-112	3	hoxb5a
lmo7a	4.20645e-115	0.201136	0.172	0.005	6.90447e-111	3	lmo7a
col1a1a	8.53698e-115	0.362377	0.249	0.019	1.40126e-110	3	col1a1a
pleca	1.67944e-114	0.578408	0.458	0.093	2.75663e-110	3	pleca
epdl1	1.89494e-114	0.273647	0.262	0.023	3.11036e-110	3	epdl1
atp2a3	6.49849e-114	0.212004	0.216	0.013	1.06666e-109	3	atp2a3
cd9a	8.53252e-114	0.311043	0.311	0.036	1.40053e-109	3	cd9a
rbfox1	6.41764e-113	0.23866	0.227	0.015	1.05339e-108	3	rbfox1
CR383676.11	9.32958e-113	0.500936	1	1	1.53136e-108	3	CR383676.1
cd151	1.22024e-112	0.316623	0.24	0.018	2.0029e-108	3	cd151
si:dkey-188i13.9	4.08619e-112	0.458215	0.326	0.042	6.70707e-108	3	si:dkey-188i13.9
prdx5	8.03254e-112	0.84799	0.667	0.233	1.31846e-107	3	prdx5
col6a2	3.05572e-111	0.313791	0.22	0.014	5.01566e-107	3	col6a2
vcam1b	1.95878e-110	0.248659	0.187	0.008	3.21514e-106	3	vcam1b
wls	2.67738e-110	0.489895	0.396	0.066	4.39466e-106	3	wls
flnb	3.79087e-109	0.188999	0.15	0.003	6.22233e-105	3	flnb
spint2	1.78938e-108	0.272845	0.185	0.008	2.93708e-104	3	spint2
gig2d	6.22439e-108	0.208535	0.154	0.004	1.02167e-103	3	gig2d
pcdh1b	7.41566e-108	0.176286	0.165	0.005	1.21721e-103	3	pcdh1b
erbb4b	3.88959e-107	0.137139	0.128	0.001	6.38437e-103	3	erbb4b
ifi461	4.33342e-106	0.866993	0.925	0.579	7.11288e-102	3	ifi46
tnk2b	8.51007e-106	0.166493	0.161	0.005	1.39684e-101	3	tnk2b
tuba8l3	2.47153e-105	0.265275	0.236	0.02	4.05676e-101	3	tuba8l3
ndrg4	2.78987e-105	0.207976	0.207	0.013	4.5793e-101	3	ndrg4
esr2a	3.21313e-105	0.452677	0.463	0.103	5.27403e-101	3	esr2a
magi1b	6.30354e-105	0.463555	0.478	0.112	1.03466e-100	3	magi1b
aste1a	7.09894e-105	0.946485	0.559	0.165	1.16522e-100	3	aste1a
anxa5b	9.83993e-105	0.401935	0.328	0.045	1.61513e-100	3	anxa5b
lef1	1.10771e-104	0.399322	0.403	0.075	1.81819e-100	3	lef1
f8	2.55413e-103	0.142881	0.123	0.001	4.19235e-99	3	f8
kcnq1.1	5.70525e-103	0.182031	0.161	0.005	9.36459e-99	3	kcnq1.1
esr2b	7.27374e-103	0.34113	0.383	0.068	1.19391e-98	3	esr2b
slc12a7b	2.86289e-102	0.674097	0.496	0.133	4.69915e-98	3	slc12a7b
mxb	3.80278e-102	0.272752	0.214	0.015	6.24188e-98	3	mxb
parvab	2.10878e-101	0.242434	0.227	0.019	3.46136e-97	3	parvab
sp5a	4.44012e-101	0.142367	0.126	0.001	7.28802e-97	3	sp5a
cdh2	6.89606e-101	0.453833	0.445	0.097	1.13192e-96	3	cdh2
apln	7.57072e-101	0.178119	0.163	0.006	1.24266e-96	3	apln
f11r.1	5.1563e-100	0.535438	0.452	0.099	8.46354e-96	3	f11r.1
slc26a4	1.39524e-97	0.123612	0.117	0.001	2.29015e-93	3	slc26a4
ncam1a	2.91408e-97	0.143504	0.128	0.002	4.78318e-93	3	ncam1a
st5	1.205e-96	0.59476	0.667	0.265	1.97789e-92	3	st5
flrt2.1	6.21446e-96	0.118015	0.112	0	1.02004e-91	3	flrt2.1
dnah2	1.78968e-95	0.188204	0.126	0.002	2.93759e-91	3	dnah2
fmnl3	1.98416e-95	0.291406	0.317	0.047	3.2568e-91	3	fmnl3
eevs	2.04912e-93	0.128662	0.119	0.001	3.36342e-89	3	eevs
lmo4a	3.72473e-93	0.222754	0.24	0.025	6.11377e-89	3	lmo4a
arhgap27l	7.88218e-93	0.161902	0.17	0.009	1.29378e-88	3	arhgap27l
wt1a	9.40478e-93	0.214668	0.222	0.021	1.5437e-88	3	wt1a
zfp36l2	1.13531e-92	0.426977	0.284	0.039	1.8635e-88	3	zfp36l2
nfia	1.30549e-92	0.295832	0.319	0.05	2.14284e-88	3	nfia
si:ch211-195b15.8	1.54858e-92	0.38528	0.262	0.032	2.54183e-88	3	si:ch211-195b15.8
slc29a1a	3.36175e-92	0.648858	0.471	0.122	5.51797e-88	3	slc29a1a
mapk8ip1a	7.49452e-92	0.154021	0.152	0.006	1.23015e-87	3	mapk8ip1a
flrt3	1.11313e-91	0.175265	0.156	0.007	1.82709e-87	3	flrt3
tuba1a	5.28616e-90	0.16758	0.137	0.004	8.6767e-86	3	tuba1a
fam184b	6.61743e-90	0.197591	0.187	0.013	1.08619e-85	3	fam184b
s100v21	8.40723e-90	0.740062	0.751	0.341	1.37996e-85	3	s100v2
ppp1r9ba	1.65154e-89	0.267086	0.271	0.036	2.71084e-85	3	ppp1r9ba
b2m1	9.32354e-89	0.638623	0.998	0.829	1.53037e-84	3	b2m
ttyh2	3.15597e-88	0.161828	0.156	0.008	5.18021e-84	3	ttyh2
ppfibp1a	5.26391e-88	0.582003	0.507	0.144	8.64018e-84	3	ppfibp1a
col4a1	2.66665e-86	0.315092	0.322	0.055	4.37703e-82	3	col4a1
ndrg3a	2.72106e-86	0.520069	0.436	0.111	4.46635e-82	3	ndrg3a
si:ch211-253b8.5	6.68077e-86	0.147766	0.137	0.005	1.09658e-81	3	si:ch211-253b8.5
olfm1b	7.28436e-86	0.144017	0.108	0.001	1.19565e-81	3	olfm1b
fthl27	7.36434e-86	0.567207	0.987	0.864	1.20878e-81	3	fthl27
si:ch211-79k12.11	8.64041e-86	0.455183	0.504	0.14	1.41824e-81	3	si:ch211-79k12.1
si:dkeyp-75h12.5	1.08151e-85	0.431487	0.361	0.071	1.77519e-81	3	si:dkeyp-75h12.5
cavin1b1	1.42729e-85	0.693128	0.537	0.176	2.34275e-81	3	cavin1b
irf8	1.47058e-84	0.235272	0.15	0.007	2.41381e-80	3	irf8
znf703	1.66519e-84	0.230662	0.244	0.03	2.73325e-80	3	znf703
cxxc5a	1.79112e-84	0.409084	0.456	0.12	2.93994e-80	3	cxxc5a
mfap5	5.02169e-84	0.209713	0.183	0.014	8.24261e-80	3	mfap5
srpx	4.18281e-83	0.16343	0.15	0.008	6.86567e-79	3	srpx
pcdh19	7.23889e-83	0.12752	0.119	0.003	1.18819e-78	3	pcdh19
st14a	1.44667e-82	0.263604	0.229	0.027	2.37457e-78	3	st14a
serpinh1b	3.28789e-82	0.663609	0.341	0.066	5.39674e-78	3	serpinh1b
si:ch211-195o20.7	5.42603e-82	0.1953	0.176	0.013	8.90629e-78	3	si:ch211-195o20.7
twist1a	9.74151e-82	0.176127	0.141	0.006	1.59897e-77	3	twist1a
lzts2a	2.92972e-81	0.191257	0.196	0.018	4.80884e-77	3	lzts2a
c2cd4a	1.06369e-80	0.150581	0.112	0.002	1.74594e-76	3	c2cd4a
jdp2b1	1.10356e-80	1.08164	0.912	0.595	1.81138e-76	3	jdp2b
ppdpfa	1.92652e-80	0.301088	0.22	0.025	3.1622e-76	3	ppdpfa
ptmaa1	2.34962e-80	0.766795	0.925	0.609	3.85666e-76	3	ptmaa
pkp2	1.94573e-79	0.159946	0.167	0.012	3.19372e-75	3	pkp2
si:ch211-105j21.9	1.05275e-78	0.11417	0.121	0.004	1.72799e-74	3	si:ch211-105j21.9
ptprua	1.09682e-78	0.119768	0.121	0.004	1.80032e-74	3	ptprua
chd5	1.81054e-78	0.165165	0.161	0.011	2.97183e-74	3	chd5
znf385a	3.03771e-78	0.104921	0.101	0.001	4.9861e-74	3	znf385a
htr1d	1.06551e-77	0.182793	0.183	0.016	1.74893e-73	3	htr1d
unc13ba	2.12436e-77	0.111528	0.112	0.003	3.48692e-73	3	unc13ba
zgc:92313	4.60611e-77	0.358734	0.275	0.044	7.56047e-73	3	zgc:92313
rai14	1.58268e-76	0.183332	0.187	0.018	2.59781e-72	3	rai14
LO018188.1	1.59473e-76	0.1347	0.123	0.005	2.61759e-72	3	LO018188.1
rab3db	2.35227e-76	0.175462	0.172	0.014	3.86102e-72	3	rab3db
ahcyl2	3.16541e-76	0.436573	0.465	0.139	5.1957e-72	3	ahcyl2
rdh10a	7.75043e-76	0.517823	0.304	0.057	1.27216e-71	3	rdh10a
si:dkeyp-9d4.2	1.01973e-75	0.319556	0.302	0.055	1.67378e-71	3	si:dkeyp-9d4.2
klf13	1.19419e-74	0.185945	0.198	0.021	1.96014e-70	3	klf13
fam107b	2.27867e-74	0.328355	0.249	0.038	3.74021e-70	3	fam107b
mao	2.74811e-74	0.182863	0.194	0.02	4.51075e-70	3	mao
nfe2l2a	3.58877e-74	0.496497	0.385	0.096	5.8906e-70	3	nfe2l2a
ccn11	6.70952e-74	0.908575	0.463	0.136	1.1013e-69	3	ccn1
mafa	1.97912e-73	0.126099	0.115	0.004	3.24853e-69	3	mafa
fosb1	2.73772e-73	0.901437	0.932	0.697	4.4937e-69	3	fosb
slc16a9b	2.98601e-73	0.229399	0.198	0.022	4.90123e-69	3	slc16a9b
csrp1a	4.03699e-73	0.361534	0.297	0.055	6.62632e-69	3	csrp1a
nfkbiab	4.5098e-73	0.702839	0.511	0.166	7.40238e-69	3	nfkbiab
pfn1	5.23154e-73	0.556959	0.423	0.116	8.58705e-69	3	pfn1
tmem200b	1.77348e-72	0.145423	0.145	0.01	2.91099e-68	3	tmem200b
nr0b1	2.16239e-71	0.378318	0.324	0.068	3.54935e-67	3	nr0b1
bcam1	1.66434e-70	0.633717	0.941	0.708	2.73185e-66	3	bcam
rrbp1a	8.17494e-70	0.286991	0.247	0.039	1.34183e-65	3	rrbp1a
pik3c2a	2.72615e-69	0.425815	0.504	0.177	4.47471e-65	3	pik3c2a
si:rp71-36a1.1	5.54907e-69	0.41384	0.524	0.187	9.10824e-65	3	si:rp71-36a1.1
pnrc21	7.05033e-69	0.754131	0.978	0.819	1.15724e-64	3	pnrc2
nr0b2a	5.52951e-68	0.12738	0.099	0.003	9.07614e-64	3	nr0b2a
hoxa3a	5.98635e-68	0.184253	0.2	0.025	9.82599e-64	3	hoxa3a
isg151	1.10456e-67	1.07727	0.683	0.313	1.81303e-63	3	isg15
ptprr	1.35692e-67	0.11076	0.106	0.004	2.22725e-63	3	ptprr
gli2a	1.42094e-67	0.104849	0.106	0.004	2.33233e-63	3	gli2a
etv4	3.08897e-67	0.226063	0.207	0.027	5.07023e-63	3	etv4
epha4a	1.65037e-66	0.12627	0.132	0.008	2.70891e-62	3	epha4a
dhrs9	1.83288e-66	0.122884	0.112	0.005	3.00848e-62	3	dhrs9
sox9b	2.3415e-66	0.137623	0.128	0.008	3.84334e-62	3	sox9b
litaf	3.82167e-66	0.357732	0.346	0.082	6.27288e-62	3	litaf
ppiaa1	3.986e-66	0.515054	0.963	0.771	6.54261e-62	3	ppiaa
arrdc3b	5.36986e-66	0.43996	0.271	0.051	8.8141e-62	3	arrdc3b
col5a1	6.47696e-66	0.282263	0.194	0.024	1.06313e-61	3	col5a1
nuak1b	9.65926e-66	0.150897	0.152	0.013	1.58547e-61	3	nuak1b
plxnb1a	1.2132e-65	0.295693	0.253	0.043	1.99134e-61	3	plxnb1a
rhbdl3	1.29792e-65	0.104408	0.093	0.002	2.13041e-61	3	rhbdl3
igfbp1a	9.42712e-65	0.278183	0.097	0.003	1.54737e-60	3	igfbp1a
kank2	1.00221e-64	0.151683	0.167	0.017	1.64503e-60	3	kank2
yap1	1.24165e-64	0.420018	0.526	0.202	2.03804e-60	3	yap1
gpx1b	2.40501e-64	0.161036	0.152	0.014	3.94759e-60	3	gpx1b
calm3a	3.38042e-64	0.640971	0.689	0.347	5.54863e-60	3	calm3a
rpz51	6.23832e-64	0.620617	0.991	0.948	1.02396e-59	3	rpz5
pdgfbb	1.38087e-63	0.106823	0.099	0.003	2.26656e-59	3	pdgfbb
col5a2a	5.14207e-63	0.152441	0.145	0.012	8.44019e-59	3	col5a2a
rbfox3a	7.9903e-63	0.139249	0.134	0.01	1.31153e-58	3	rbfox3a
dbn1	2.63117e-62	0.208869	0.209	0.031	4.3188e-58	3	dbn1
dmxl2	2.99821e-62	0.18494	0.181	0.022	4.92126e-58	3	dmxl2
si:ch1073-303k11.2	6.87345e-62	0.104151	0.088	0.002	1.12821e-57	3	si:ch1073-303k11.2
im:7151449	8.4672e-62	0.107259	0.108	0.005	1.38981e-57	3	im:7151449
aplp1	1.00747e-61	0.16461	0.159	0.016	1.65366e-57	3	aplp1
lrrc17	1.76813e-61	0.182252	0.152	0.015	2.90221e-57	3	lrrc17
smad3a	2.19598e-61	0.24995	0.306	0.069	3.60448e-57	3	smad3a
TENM3	5.46384e-61	0.122267	0.117	0.007	8.96834e-57	3	TENM3
jpt1b	1.12271e-60	0.515227	0.432	0.14	1.84281e-56	3	jpt1b
tspan18b1	2.28713e-60	0.391702	0.423	0.125	3.75409e-56	3	tspan18b
b3glctb	4.20845e-60	0.10044	0.086	0.002	6.90774e-56	3	b3glctb
slc29a4	5.21015e-60	0.102547	0.106	0.005	8.55194e-56	3	slc29a4
kif19	1.47172e-59	0.11238	0.108	0.006	2.41568e-55	3	kif19
add3b	4.38406e-59	0.126015	0.128	0.01	7.19599e-55	3	add3b
gpr22a	5.42795e-59	0.146846	0.119	0.008	8.90943e-55	3	gpr22a
col4a2	1.02547e-58	0.244482	0.26	0.052	1.68321e-54	3	col4a2
eppk1	1.213e-58	0.390342	0.449	0.153	1.99103e-54	3	eppk1
sdcbp2	2.32389e-58	0.567374	0.687	0.377	3.81444e-54	3	sdcbp2
usp43b	3.97879e-58	0.166322	0.17	0.021	6.53079e-54	3	usp43b
si:dkey-238i5.2	1.19672e-57	0.212111	0.251	0.049	1.9643e-53	3	si:dkey-238i5.2
map2k1	1.33268e-57	0.298553	0.344	0.093	2.18747e-53	3	map2k1
sulf1	1.93279e-57	0.197662	0.185	0.026	3.17248e-53	3	sulf1
CT027638.1	2.76833e-57	1.05375	0.436	0.158	4.54394e-53	3	CT027638.1
lgals9l3	6.69509e-57	0.363972	0.425	0.142	1.09893e-52	3	lgals9l3
zgc:193505	1.02149e-56	0.143576	0.101	0.005	1.67667e-52	3	zgc:193505
CU459094.2	1.70702e-56	0.1642	0.15	0.016	2.80191e-52	3	CU459094.2
axin2	3.61656e-56	0.321377	0.396	0.124	5.93623e-52	3	axin2
prrg2	4.2957e-56	0.157911	0.134	0.012	7.05096e-52	3	prrg2
zgc:92606	1.54287e-55	0.442004	0.445	0.154	2.53246e-51	3	zgc:92606
epha2a	3.25985e-55	0.125507	0.123	0.01	5.35072e-51	3	epha2a
soul5	4.04605e-55	0.104266	0.104	0.006	6.64119e-51	3	soul5
notum1b	4.41791e-55	0.151498	0.121	0.01	7.25155e-51	3	notum1b
zgc:1037001	6.12858e-55	0.628371	0.584	0.243	1.00595e-50	3	zgc:103700
myo1ca	6.81954e-55	0.23142	0.282	0.064	1.11936e-50	3	myo1ca
ldlrap1a	9.6295e-55	0.267424	0.196	0.031	1.58059e-50	3	ldlrap1a
rca2.1	1.08942e-54	0.261795	0.264	0.057	1.78818e-50	3	rca2.1
ywhah	1.51146e-54	0.284199	0.317	0.082	2.48091e-50	3	ywhah
pigr	1.81633e-54	0.100314	0.101	0.006	2.98132e-50	3	pigr
lrch4	2.97157e-54	0.166645	0.187	0.028	4.87754e-50	3	lrch4
lamb1b	1.07008e-53	0.13657	0.156	0.019	1.75642e-49	3	lamb1b
glud1a	2.00299e-53	0.394815	0.407	0.132	3.2877e-49	3	glud1a
galr2b	4.08806e-53	0.107616	0.112	0.008	6.71013e-49	3	galr2b
cav21	7.68697e-53	0.310837	0.452	0.156	1.26174e-48	3	cav2
slc16a10	1.0667e-52	0.203417	0.189	0.03	1.75088e-48	3	slc16a10
zgc:152658	1.57897e-52	0.169318	0.185	0.029	2.59172e-48	3	zgc:152658
cd99	3.95668e-52	0.41031	0.388	0.126	6.4945e-48	3	cd99
tppp3	4.0732e-52	0.116989	0.07	0.001	6.68574e-48	3	tppp3
scn4bb	4.20565e-52	0.206096	0.218	0.041	6.90315e-48	3	scn4bb
ctss2.2	6.39783e-52	0.103227	0.115	0.009	1.05014e-47	3	ctss2.2
glo1	1.45349e-51	0.279241	0.262	0.059	2.38576e-47	3	glo1
afap1	3.06784e-51	0.102803	0.097	0.006	5.03556e-47	3	afap1
agrn1	3.65904e-51	0.49482	0.872	0.569	6.00595e-47	3	agrn
col6a3	4.68452e-51	0.187338	0.126	0.012	7.68918e-47	3	col6a3
klf12a	6.77587e-51	0.201696	0.238	0.05	1.11219e-46	3	klf12a
fosl2	9.87395e-51	0.259869	0.295	0.076	1.62071e-46	3	fosl2
znfx1	1.14454e-50	0.187365	0.185	0.03	1.87865e-46	3	znfx1
si:dkey-16l2.201	3.52651e-50	0.438228	0.421	0.143	5.78842e-46	3	si:dkey-16l2.20
col8a1a	4.28231e-50	0.134942	0.128	0.013	7.02899e-46	3	col8a1a
capn2b	5.21362e-50	0.23018	0.286	0.073	8.55763e-46	3	capn2b
xaf1	8.14075e-49	0.332129	0.363	0.116	1.33622e-44	3	xaf1
fam171a2a	8.40469e-49	0.14264	0.17	0.026	1.37955e-44	3	fam171a2a
tmsb11	8.68161e-49	0.715612	0.811	0.503	1.425e-44	3	tmsb1
klf6a1	9.77418e-49	0.654388	0.912	0.607	1.60433e-44	3	klf6a
asap3	1.43951e-48	0.118761	0.132	0.015	2.36281e-44	3	asap3
raraa	2.99414e-48	0.166894	0.178	0.029	4.91458e-44	3	raraa
cd74a1	4.04454e-48	0.677381	0.888	0.541	6.63872e-44	3	cd74a
rgs16	4.18904e-48	0.107848	0.075	0.003	6.87589e-44	3	rgs16
spry4	4.69611e-48	0.280926	0.194	0.035	7.70819e-44	3	spry4
mgst1.1	5.24594e-48	0.225112	0.291	0.077	8.61069e-44	3	mgst1.1
hsd11b2	5.26023e-48	0.795242	0.432	0.178	8.63414e-44	3	hsd11b2
F7 (1 of many)	8.57042e-48	0.237492	0.26	0.062	1.40675e-43	3	F7 (1 of many)
dusp8a	1.84948e-47	0.169435	0.181	0.03	3.03574e-43	3	dusp8a
hpca	3.66581e-47	0.130388	0.134	0.016	6.01706e-43	3	hpca
klf11b	5.34909e-47	0.497758	0.471	0.198	8.78e-43	3	klf11b
pdgfd	5.41235e-47	0.151574	0.165	0.025	8.88383e-43	3	pdgfd
si:dkey-195m11.8	7.20144e-47	0.112884	0.112	0.01	1.18204e-42	3	si:dkey-195m11.8
pim11	1.90276e-46	0.66266	0.742	0.451	3.12319e-42	3	pim1
tmem258	1.98714e-46	0.327272	0.322	0.094	3.26169e-42	3	tmem258
cldn5a1	2.23406e-46	0.355292	0.476	0.194	3.66699e-42	3	cldn5a
gse1	2.67186e-46	0.140417	0.161	0.024	4.38559e-42	3	gse1
si:ch211-198c19.3	2.98163e-46	0.121192	0.115	0.011	4.89405e-42	3	si:ch211-198c19.3
il17rd	3.16504e-46	0.140006	0.176	0.03	5.1951e-42	3	il17rd
grb10a	4.63097e-46	0.331255	0.412	0.152	7.60127e-42	3	grb10a
postnb	7.68193e-46	0.184453	0.165	0.026	1.26091e-41	3	postnb
tmcc3	1.20175e-45	0.160632	0.174	0.03	1.97255e-41	3	tmcc3
vim	1.44628e-45	0.161513	0.13	0.015	2.37392e-41	3	vim
zgc:113054	2.65441e-45	0.164019	0.172	0.029	4.35695e-41	3	zgc:113054
lmbr1l	2.77412e-45	0.12225	0.137	0.017	4.55345e-41	3	lmbr1l
atp2b41	3.3561e-45	0.386838	0.487	0.198	5.5087e-41	3	atp2b4
hdlbpa	4.6386e-45	0.288159	0.256	0.063	7.61381e-41	3	hdlbpa
cox8b	5.9492e-45	0.227726	0.209	0.043	9.76502e-41	3	cox8b
si:ch73-380l3.4	6.61515e-45	0.259307	0.326	0.1	1.08581e-40	3	si:ch73-380l3.4
cbr1l	2.37237e-44	0.179891	0.145	0.021	3.89401e-40	3	cbr1l
irs1	2.39841e-44	0.313452	0.416	0.16	3.93675e-40	3	irs1
zgc:1951731	2.43492e-44	0.353902	0.436	0.177	3.99668e-40	3	zgc:195173
hoxd9a	4.88841e-44	0.128349	0.119	0.013	8.02384e-40	3	hoxd9a
rhocb	5.10894e-44	0.347842	0.359	0.12	8.38581e-40	3	rhocb
si:ch211-226m16.2	5.26075e-44	0.141309	0.148	0.022	8.63499e-40	3	si:ch211-226m16.2
wu:fj29h11	8.32813e-44	0.378652	0.355	0.122	1.36698e-39	3	wu:fj29h11
ugt1b5	4.4869e-43	0.149927	0.178	0.033	7.3648e-39	3	ugt1b5
tpd52l2b	7.59708e-43	0.313351	0.341	0.111	1.24699e-38	3	tpd52l2b
cd631	8.17436e-43	0.450704	0.612	0.313	1.34174e-38	3	cd63
zbtb20	1.23998e-42	0.383639	0.548	0.274	2.0353e-38	3	zbtb20
tapbp.11	1.3154e-42	0.428873	0.445	0.174	2.1591e-38	3	tapbp.1
epha6	1.40159e-42	0.128369	0.134	0.018	2.30057e-38	3	epha6
ppp1r3cb	3.31022e-42	0.11962	0.11	0.012	5.43339e-38	3	ppp1r3cb
dusp2	4.04399e-42	0.781971	0.617	0.357	6.6378e-38	3	dusp2
emx21	5.59555e-42	0.499646	0.797	0.529	9.18453e-38	3	emx2
xbp1	8.80911e-42	0.565732	0.65	0.383	1.44593e-37	3	xbp1
arl6ip5b	9.9573e-42	0.237042	0.284	0.083	1.63439e-37	3	arl6ip5b
nfkb2	1.13547e-41	0.223017	0.244	0.063	1.86376e-37	3	nfkb2
tmem256	1.47255e-41	0.38309	0.357	0.126	2.41704e-37	3	tmem256
slc25a23a	1.61514e-41	0.15033	0.17	0.031	2.65109e-37	3	slc25a23a
ache	2.26554e-41	0.135563	0.139	0.02	3.71865e-37	3	ache
rsad2	2.73907e-41	0.511546	0.227	0.055	4.49591e-37	3	rsad2
BX000534.1	3.85966e-41	0.179183	0.11	0.012	6.33525e-37	3	BX000534.1
socs3a1	5.06491e-41	0.576194	0.974	0.821	8.31355e-37	3	socs3a
myl6	1.36587e-40	0.239788	0.258	0.069	2.24193e-36	3	myl6
ca10a	1.96914e-40	0.105688	0.112	0.013	3.23214e-36	3	ca10a
LO017815.1	3.08069e-40	0.106343	0.097	0.009	5.05664e-36	3	LO017815.1
si:dkey-28b4.8	3.10662e-40	0.180314	0.22	0.053	5.09921e-36	3	si:dkey-28b4.8
rab11fip4b	3.86696e-40	0.236372	0.304	0.095	6.34723e-36	3	rab11fip4b
tagapa	7.48572e-40	0.171946	0.128	0.018	1.22871e-35	3	tagapa
chad	1.60458e-39	0.118293	0.09	0.008	2.63376e-35	3	chad
si:ch211-199g17.2	1.87223e-39	0.423806	0.566	0.282	3.07308e-35	3	si:ch211-199g17.2
si:dkey-188i13.10	2.69342e-39	0.439166	0.564	0.285	4.42098e-35	3	si:dkey-188i13.10
cebpb1	3.97513e-39	0.658832	0.654	0.362	6.52478e-35	3	cebpb
sema6d	3.99293e-39	0.124092	0.141	0.022	6.554e-35	3	sema6d
zgc:152774	6.82768e-39	0.120988	0.128	0.018	1.1207e-34	3	zgc:152774
calcoco2	1.68462e-38	0.17975	0.205	0.048	2.76514e-34	3	calcoco2
si:ch211-166a6.5	2.06702e-38	0.222152	0.286	0.089	3.39281e-34	3	si:ch211-166a6.5
tmem30ab	2.22406e-38	0.31301	0.377	0.145	3.65058e-34	3	tmem30ab
igfbp5b	2.45688e-38	0.384512	0.401	0.159	4.03272e-34	3	igfbp5b
fblim1	2.95024e-38	0.229922	0.324	0.11	4.84253e-34	3	fblim1
zgc:1627301	3.48945e-38	0.582674	0.804	0.491	5.72759e-34	3	zgc:162730
hmgb3a	3.58892e-38	0.289297	0.416	0.171	5.89086e-34	3	hmgb3a
ier5l	4.8172e-38	0.143609	0.095	0.009	7.90695e-34	3	ier5l
gstp11	6.65117e-38	0.361321	0.361	0.13	1.09172e-33	3	gstp1
zgc:194655	8.00782e-38	0.16377	0.148	0.026	1.3144e-33	3	zgc:194655
adh8b	8.45246e-38	0.213758	0.207	0.05	1.38739e-33	3	adh8b
znf503	1.47584e-37	0.102534	0.11	0.014	2.42244e-33	3	znf503
tgm1l1	1.59906e-37	0.147644	0.176	0.036	2.62469e-33	3	tgm1l1
ifi45	1.63681e-37	0.613633	0.518	0.258	2.68666e-33	3	ifi45
si:dkey-16l2.16	2.10418e-37	0.185615	0.161	0.031	3.4538e-33	3	si:dkey-16l2.16
gsto2	2.94022e-37	0.15558	0.156	0.029	4.82608e-33	3	gsto2
fkbp1aa	3.42371e-37	0.481782	0.74	0.482	5.61967e-33	3	fkbp1aa
rbpms2b	3.56489e-37	0.199458	0.128	0.019	5.8514e-33	3	rbpms2b
si:dkey-112a7.4	4.9298e-37	0.26937	0.244	0.068	8.09178e-33	3	si:dkey-112a7.4
skap2	4.96186e-37	0.107411	0.126	0.018	8.14439e-33	3	skap2
zgc:92140	5.63608e-37	0.241511	0.267	0.082	9.25107e-33	3	zgc:92140
fosab1	9.63716e-37	0.462678	0.991	0.95	1.58184e-32	3	fosab
zfp36l1b1	1.61215e-36	0.501979	0.599	0.339	2.64619e-32	3	zfp36l1b
cd74b1	2.45429e-36	0.449508	0.896	0.567	4.02847e-32	3	cd74b
ugt5g1	4.91958e-36	0.117118	0.106	0.013	8.07499e-32	3	ugt5g1
coro2a	1.03547e-35	0.103848	0.119	0.017	1.69962e-31	3	coro2a
cgnl1	2.07155e-35	0.233281	0.291	0.098	3.40024e-31	3	cgnl1
spred2b	2.69389e-35	0.149278	0.17	0.036	4.42175e-31	3	spred2b
irf1b1	4.35684e-35	0.45965	0.328	0.118	7.15133e-31	3	irf1b
mgst3a	4.3937e-35	0.289589	0.278	0.09	7.21182e-31	3	mgst3a
mpped2a	4.50265e-35	0.205735	0.262	0.082	7.39065e-31	3	mpped2a
calm1b	4.52562e-35	0.181577	0.22	0.059	7.42835e-31	3	calm1b
hsp90aa1.21	1.0283e-34	0.725713	0.797	0.562	1.68785e-30	3	hsp90aa1.2
marcksa	1.59012e-34	0.103596	0.117	0.017	2.61003e-30	3	marcksa
ier51	5.15126e-34	0.501305	0.795	0.545	8.45528e-30	3	ier5
arhgef1b	5.29207e-34	0.396686	0.443	0.215	8.6864e-30	3	arhgef1b
mhc1zba1	5.49086e-34	0.37152	0.91	0.739	9.01269e-30	3	mhc1zba
tnfsf12	1.07033e-33	0.200332	0.242	0.071	1.75685e-29	3	tnfsf12
hsd3b71	1.40692e-33	0.259984	0.207	0.054	2.30932e-29	3	hsd3b7
myl9b1	1.67698e-33	0.334968	0.507	0.238	2.75259e-29	3	myl9b
rps27.21	3.19879e-33	0.244381	1	0.986	5.25049e-29	3	rps27.2
cavin2a	3.54393e-33	0.220888	0.306	0.109	5.817e-29	3	cavin2a
n4bp1	4.45516e-33	0.206707	0.242	0.074	7.3127e-29	3	n4bp1
CR762483.1	7.36134e-33	0.194434	0.081	0.008	1.20829e-28	3	CR762483.1
ccdc88c	7.98298e-33	0.108844	0.126	0.021	1.31033e-28	3	ccdc88c
tmsb4x1	8.53977e-33	0.260091	1	0.998	1.40172e-28	3	tmsb4x
anxa11a	1.12711e-32	0.205695	0.225	0.063	1.85003e-28	3	anxa11a
ankrd22	1.29361e-32	0.103159	0.09	0.01	2.12333e-28	3	ankrd22
CU984600.2	3.17861e-32	0.220512	0.222	0.064	5.21737e-28	3	CU984600.2
tgif1	4.09176e-32	0.351207	0.432	0.195	6.71621e-28	3	tgif1
actb11	4.52782e-32	0.450158	0.938	0.735	7.43197e-28	3	actb1
serinc2	5.5283e-32	0.342394	0.445	0.205	9.07415e-28	3	serinc2
cntfr	9.35223e-32	0.200778	0.231	0.069	1.53508e-27	3	cntfr
smox	1.19689e-31	0.148658	0.192	0.05	1.96458e-27	3	smox
tjp2b	1.8354e-31	0.294261	0.341	0.132	3.01262e-27	3	tjp2b
CABZ01044746.1	2.0752e-31	0.171474	0.139	0.027	3.40624e-27	3	CABZ01044746.1
smad5	2.19746e-31	0.179506	0.161	0.036	3.60691e-27	3	smad5
vat11	3.04905e-31	0.38625	0.447	0.203	5.0047e-27	3	vat1
si:dkey-222f8.3	3.1661e-31	0.251818	0.306	0.111	5.19684e-27	3	si:dkey-222f8.3
itgav	6.93543e-31	0.171606	0.214	0.062	1.13838e-26	3	itgav
zgc:153372	8.99013e-31	0.195317	0.247	0.08	1.47564e-26	3	zgc:153372
arpc1b	9.15421e-31	0.148767	0.141	0.029	1.50257e-26	3	arpc1b
celf2	9.26743e-31	0.16456	0.209	0.06	1.52116e-26	3	celf2
si:ch211-212k18.7	9.85991e-31	0.377215	0.456	0.218	1.61841e-26	3	si:ch211-212k18.7
rnf213a	1.4112e-30	0.415926	0.617	0.362	2.31634e-26	3	rnf213a
mxi1	1.77592e-30	0.164428	0.203	0.057	2.915e-26	3	mxi1
f101	3.00367e-30	0.411723	0.498	0.273	4.93022e-26	3	f10
tspan15	3.14707e-30	0.102084	0.115	0.019	5.1656e-26	3	tspan15
si:ch1073-291c23.2	3.41838e-30	0.153408	0.132	0.026	5.61094e-26	3	si:ch1073-291c23.2
plecb	3.50456e-30	0.199193	0.271	0.095	5.75239e-26	3	plecb
adamtsl5	3.66384e-30	0.120233	0.13	0.025	6.01382e-26	3	adamtsl5
tubb4b1	5.61302e-30	0.422406	0.844	0.559	9.21321e-26	3	tubb4b
si:busm1-266f07.21	7.01492e-30	0.609045	0.449	0.214	1.15143e-25	3	si:busm1-266f07.2
rnd3b	8.13877e-30	0.134167	0.172	0.042	1.3359e-25	3	rnd3b
h2afvb	1.06401e-29	0.475895	0.427	0.198	1.74647e-25	3	h2afvb
pbxip1b	1.60132e-29	0.227302	0.249	0.083	2.62841e-25	3	pbxip1b
fgd5a	4.03788e-29	0.150424	0.167	0.042	6.62778e-25	3	fgd5a
setbp1	5.06208e-29	0.139026	0.187	0.051	8.3089e-25	3	setbp1
tfe3a	5.07756e-29	0.199044	0.308	0.119	8.33431e-25	3	tfe3a
pde4ba	8.31766e-29	0.446415	0.817	0.64	1.36526e-24	3	pde4ba
ubb1	8.76401e-29	0.48891	0.793	0.54	1.43853e-24	3	ubb
CU638714.1	1.08001e-28	0.130438	0.134	0.028	1.77273e-24	3	CU638714.1
zfhx4	1.08505e-28	0.156314	0.172	0.044	1.78099e-24	3	zfhx4
fat1a	1.40976e-28	0.253902	0.405	0.194	2.31399e-24	3	fat1a
kcng4a	1.43549e-28	0.127207	0.143	0.032	2.35621e-24	3	kcng4a
tp53	1.49474e-28	0.220745	0.286	0.105	2.45347e-24	3	tp53
gpc4	1.5617e-28	0.319152	0.515	0.286	2.56338e-24	3	gpc4
si:ch211-281l24.3	2.36896e-28	0.28844	0.427	0.199	3.88842e-24	3	si:ch211-281l24.3
txnipa1	4.48612e-28	0.410682	0.531	0.293	7.36351e-24	3	txnipa
fzd7a	5.68531e-28	0.120083	0.126	0.025	9.33187e-24	3	fzd7a
rgs12b	6.0197e-28	0.163716	0.229	0.074	9.88073e-24	3	rgs12b
thy1	9.12984e-28	0.211837	0.11	0.019	1.49857e-23	3	thy1
si:busm1-194e12.111	1.3067e-27	0.351563	0.396	0.19	2.14482e-23	3	si:busm1-194e12.11
pdlim1	1.64744e-27	0.255008	0.282	0.106	2.70411e-23	3	pdlim1
mgst3b	3.56715e-27	0.347343	0.718	0.482	5.85511e-23	3	mgst3b
prkd2	3.61656e-27	0.196679	0.278	0.106	5.93623e-23	3	prkd2
kirrel1a	1.02529e-26	0.114318	0.161	0.041	1.68291e-22	3	kirrel1a
cd151l	1.2975e-26	0.173304	0.17	0.045	2.12971e-22	3	cd151l
lasp1	2.17996e-26	0.296266	0.436	0.215	3.57819e-22	3	lasp1
cux1a	2.19502e-26	0.258966	0.434	0.222	3.60291e-22	3	cux1a
tuft1a1	2.6564e-26	0.260185	0.291	0.115	4.36021e-22	3	tuft1a
ccl19a.1	3.78923e-26	0.148774	0.104	0.018	6.21964e-22	3	ccl19a.1
tuba1b	3.85836e-26	0.14675	0.112	0.022	6.33312e-22	3	tuba1b
her9	5.25773e-26	0.430826	0.641	0.379	8.63004e-22	3	her9
atp11a	7.45747e-26	0.137477	0.156	0.041	1.22407e-21	3	atp11a
zgc:153867	7.84393e-26	0.366235	0.8	0.56	1.2875e-21	3	zgc:153867
egr11	9.29448e-26	0.476715	0.837	0.646	1.5256e-21	3	egr1
gpx1a	9.79496e-26	0.190305	0.189	0.057	1.60774e-21	3	gpx1a
slc12a4	1.39298e-25	0.133433	0.165	0.045	2.28644e-21	3	slc12a4
ap1b1	1.46079e-25	0.127009	0.13	0.029	2.39774e-21	3	ap1b1
aclya	1.61867e-25	0.137361	0.128	0.028	2.65688e-21	3	aclya
id2b1	2.1752e-25	0.618329	0.275	0.112	3.57038e-21	3	id2b
zmp:0000001114	2.24132e-25	0.123014	0.174	0.049	3.6789e-21	3	zmp:0000001114
si:dkey-112e7.21	2.65263e-25	0.25069	0.319	0.134	4.35402e-21	3	si:dkey-112e7.2
ch25hl3	3.80281e-25	0.263915	0.291	0.118	6.24193e-21	3	ch25hl3
ifi301	1.0745e-24	0.355166	0.687	0.406	1.76369e-20	3	ifi30
tmem88b	1.21418e-24	0.140204	0.134	0.031	1.99295e-20	3	tmem88b
hopx	1.35483e-24	0.209876	0.15	0.039	2.22382e-20	3	hopx
sh3gl3b	1.55993e-24	0.278979	0.348	0.159	2.56046e-20	3	sh3gl3b
lhfpl2a	2.66544e-24	0.148552	0.242	0.089	4.37505e-20	3	lhfpl2a
plscr3b	3.07066e-24	0.167926	0.2	0.063	5.04018e-20	3	plscr3b
adamts21	3.26869e-24	0.236699	0.41	0.206	5.36523e-20	3	adamts2
gnb2	3.66964e-24	0.11807	0.156	0.043	6.02335e-20	3	gnb2
si:dkey-58f10.4	3.83124e-24	0.103276	0.099	0.018	6.2886e-20	3	si:dkey-58f10.4
ralab	6.09419e-24	0.239785	0.438	0.234	1.0003e-19	3	ralab
si:dkey-51e6.1	8.40874e-24	0.190234	0.209	0.071	1.38021e-19	3	si:dkey-51e6.1
alcamb	8.77045e-24	0.282632	0.348	0.168	1.43958e-19	3	alcamb
plekhg2	9.76386e-24	0.113496	0.161	0.045	1.60264e-19	3	plekhg2
reep3a	9.94047e-24	0.127945	0.172	0.051	1.63163e-19	3	reep3a
glis2a	1.09391e-23	0.111781	0.154	0.042	1.79554e-19	3	glis2a
itga6b	1.96106e-23	0.15631	0.2	0.067	3.21888e-19	3	itga6b
ddx4	2.13384e-23	0.156066	0.055	0.005	3.50248e-19	3	ddx4
2020-06-01	2.76586e-23	0.348675	0.978	0.928	4.53989e-19	3	jun
pbx4	3.0403e-23	0.270078	0.359	0.17	4.99035e-19	3	pbx4
dynll1	3.54486e-23	0.351048	0.289	0.117	5.81854e-19	3	dynll1
dsc2l1	7.20232e-23	0.252792	0.496	0.291	1.18219e-18	3	dsc2l
mycn1	7.45515e-23	0.210039	0.348	0.159	1.22369e-18	3	mycn
si:ch211-15b10.61	8.90688e-23	0.280385	0.344	0.158	1.46197e-18	3	si:ch211-15b10.6
phc2a	9.91947e-23	0.183166	0.167	0.049	1.62818e-18	3	phc2a
pxna	1.10781e-22	0.10746	0.106	0.022	1.81836e-18	3	pxna
rbm47	1.39614e-22	0.108569	0.141	0.037	2.29162e-18	3	rbm47
rap1b	1.98832e-22	0.195272	0.286	0.119	3.26364e-18	3	rap1b
zmp:0000000912	2.35528e-22	0.165124	0.192	0.065	3.86596e-18	3	zmp:0000000912
tspan3a	3.06655e-22	0.248565	0.392	0.192	5.03344e-18	3	tspan3a
sox11b	3.28093e-22	0.100318	0.059	0.007	5.38532e-18	3	sox11b
si:ch211-214p13.9	3.33458e-22	0.141033	0.174	0.055	5.47338e-18	3	si:ch211-214p13.9
rnf213b	4.45879e-22	0.22389	0.269	0.113	7.31866e-18	3	rnf213b
abhd15a	5.51967e-22	0.199392	0.22	0.083	9.05998e-18	3	abhd15a
pard6a	6.13904e-22	0.111121	0.134	0.035	1.00766e-17	3	pard6a
ptp4a1	6.63709e-22	0.166582	0.187	0.062	1.08941e-17	3	ptp4a1
nfybb	7.16442e-22	0.192289	0.251	0.102	1.17597e-17	3	nfybb
uchl1	7.65328e-22	0.221138	0.119	0.028	1.25621e-17	3	uchl1
f3b1	1.2615e-21	0.499007	0.698	0.476	2.07063e-17	3	f3b
afdna	1.29433e-21	0.237911	0.39	0.208	2.12452e-17	3	afdna
mcl1a1	1.40633e-21	0.388545	0.896	0.697	2.30835e-17	3	mcl1a
ca8	1.77616e-21	0.119204	0.148	0.042	2.91539e-17	3	ca8
fn1a	1.86966e-21	0.111043	0.137	0.037	3.06886e-17	3	fn1a
srgn	2.12692e-21	0.138514	0.064	0.008	3.49113e-17	3	srgn
steap4	2.19141e-21	0.157827	0.17	0.054	3.59699e-17	3	steap4
capns1b1	2.41072e-21	0.285598	0.5	0.28	3.95696e-17	3	capns1b
arpc4	2.41314e-21	0.157225	0.211	0.075	3.96092e-17	3	arpc4
dnajb1b1	2.72611e-21	0.393012	0.808	0.603	4.47463e-17	3	dnajb1b
tmsb	3.30147e-21	0.113635	0.081	0.014	5.41904e-17	3	tmsb
CT956002.2	3.43864e-21	0.133318	0.183	0.061	5.64419e-17	3	CT956002.2
hephl1a	3.64071e-21	0.162634	0.302	0.134	5.97587e-17	3	hephl1a
tnrc6c1	4.92965e-21	0.302755	0.509	0.3	8.09153e-17	3	tnrc6c1
esr1	4.94883e-21	0.123361	0.159	0.048	8.12301e-17	3	esr1
tax1bp3	5.17956e-21	0.155923	0.225	0.084	8.50172e-17	3	tax1bp3
nhsl1a	6.05492e-21	0.179644	0.229	0.09	9.93854e-17	3	nhsl1a
cast	6.45166e-21	0.210297	0.271	0.112	1.05898e-16	3	cast
egr4	7.61144e-21	0.436596	0.079	0.014	1.24934e-16	3	egr4
sdc41	1.25411e-20	0.378049	0.782	0.554	2.05849e-16	3	sdc4
mfge8a	1.53204e-20	0.121563	0.145	0.042	2.51469e-16	3	mfge8a
si:ch211-66k16.27	1.59727e-20	0.148512	0.218	0.084	2.62176e-16	3	si:ch211-66k16.27
mhc2b1	1.83046e-20	0.338228	0.385	0.198	3.00452e-16	3	mhc2b
junba1	2.63235e-20	0.324545	0.947	0.817	4.32073e-16	3	junba
osbpl10b	2.83764e-20	0.154495	0.207	0.077	4.6577e-16	3	osbpl10b
sh3bgrl3	2.84234e-20	0.179794	0.203	0.074	4.66541e-16	3	sh3bgrl3
ppp1r10	5.26933e-20	0.207407	0.253	0.109	8.64907e-16	3	ppp1r10
b2ml2	5.47901e-20	0.235236	0.985	0.941	8.99325e-16	3	b2ml
fkbp7	6.88917e-20	0.113013	0.141	0.041	1.13079e-15	3	fkbp7
aplp2	7.47763e-20	0.341482	0.529	0.336	1.22738e-15	3	aplp2
jund	7.565e-20	0.38046	0.681	0.493	1.24172e-15	3	jund
ERC1	7.99318e-20	0.118657	0.139	0.04	1.312e-15	3	ERC1
hsp90b1	1.01078e-19	0.192673	0.196	0.069	1.65909e-15	3	hsp90b1
cadm4	1.2398e-19	0.126139	0.178	0.061	2.035e-15	3	cadm4
hmgn2	1.38878e-19	0.666249	0.656	0.44	2.27954e-15	3	hmgn2
mhc2dab1	1.45756e-19	0.184896	0.275	0.121	2.39244e-15	3	mhc2dab
zgc:158463	1.66521e-19	0.450501	0.557	0.38	2.73327e-15	3	zgc:158463
abracl	4.00766e-19	0.148309	0.134	0.039	6.57817e-15	3	abracl
ecrg4a1	6.291e-19	0.272027	0.3	0.145	1.0326e-14	3	ecrg4a
ccdc85b	6.75477e-19	0.227192	0.421	0.242	1.10873e-14	3	ccdc85b
si:dkey-56m19.51	7.89571e-19	0.181358	0.222	0.089	1.296e-14	3	si:dkey-56m19.5
podxl	8.99651e-19	0.423057	0.304	0.153	1.47669e-14	3	podxl
lgals17	2.08412e-18	0.175688	0.26	0.115	3.42087e-14	3	lgals17
cbx7a	2.24767e-18	0.183885	0.22	0.086	3.68932e-14	3	cbx7a
map3k14a	2.73208e-18	0.123926	0.183	0.067	4.48444e-14	3	map3k14a
calm2a	3.05974e-18	0.243747	0.315	0.153	5.02225e-14	3	calm2a
plpp2b	3.22964e-18	0.123245	0.189	0.071	5.30113e-14	3	plpp2b
soga1	3.64057e-18	0.109714	0.121	0.034	5.97563e-14	3	soga1
ly75	4.19026e-18	0.140873	0.167	0.059	6.8779e-14	3	ly75
iqgap1	4.63964e-18	0.145687	0.238	0.101	7.61551e-14	3	iqgap1
sorl1	4.74203e-18	0.150027	0.249	0.11	7.78356e-14	3	sorl1
gpd1c	4.7751e-18	0.112915	0.159	0.054	7.83784e-14	3	gpd1c
trim105	5.15685e-18	0.144988	0.218	0.09	8.46445e-14	3	trim105
zgc:158343	5.27964e-18	0.324564	0.302	0.146	8.66601e-14	3	zgc:158343
bsg	5.78405e-18	0.293054	0.57	0.364	9.49393e-14	3	bsg
scpep1	6.28993e-18	0.163707	0.216	0.085	1.03243e-13	3	scpep1
sptan1	7.06129e-18	0.189251	0.249	0.108	1.15904e-13	3	sptan1
nme3	7.68393e-18	0.170597	0.227	0.094	1.26124e-13	3	nme3
gpx4a1	9.52674e-18	0.158996	0.258	0.111	1.56372e-13	3	gpx4a
ss18l2	1.25457e-17	0.101381	0.115	0.031	2.05925e-13	3	ss18l2
fbxl7	1.29134e-17	0.152992	0.236	0.103	2.11961e-13	3	fbxl7
ctnnb2	1.37357e-17	0.201223	0.289	0.135	2.25457e-13	3	ctnnb2
si:ch73-233k15.2	1.5837e-17	0.137428	0.205	0.082	2.59948e-13	3	si:ch73-233k15.2
rhoab1	1.63607e-17	0.256721	0.372	0.197	2.68545e-13	3	rhoab
grna1	1.86716e-17	0.180354	0.319	0.161	3.06476e-13	3	grna
ip6k2a	1.94423e-17	0.198818	0.37	0.203	3.19126e-13	3	ip6k2a
fez1	2.4623e-17	0.166321	0.174	0.065	4.04163e-13	3	fez1
pkig	2.62424e-17	0.118073	0.167	0.058	4.30743e-13	3	pkig
pbx1a	2.68599e-17	0.137744	0.218	0.091	4.40878e-13	3	pbx1a
tnfrsf191	2.68756e-17	0.1423	0.286	0.134	4.41136e-13	3	tnfrsf19
arhgef18a1	3.12698e-17	0.238059	0.405	0.238	5.13263e-13	3	arhgef18a
lmna	3.81415e-17	0.111618	0.139	0.045	6.26055e-13	3	lmna
socs3b	4.0722e-17	0.162931	0.154	0.052	6.68411e-13	3	socs3b
tspan4b	4.37309e-17	0.105507	0.09	0.021	7.17799e-13	3	tspan4b
mvp	4.49573e-17	0.177029	0.262	0.123	7.3793e-13	3	mvp
parp8	5.12819e-17	0.11202	0.174	0.064	8.41741e-13	3	parp8
rps261	5.65412e-17	0.173323	1	0.992	9.28067e-13	3	rps26
serpinb1l1	5.9516e-17	0.144563	0.236	0.104	9.76896e-13	3	serpinb1l1
stat1b	6.42597e-17	0.154039	0.231	0.1	1.05476e-12	3	stat1b
ifit12	8.40525e-17	0.108063	0.159	0.056	1.37964e-12	3	ifit12
fstl1b	9.15454e-17	0.15942	0.2	0.083	1.50263e-12	3	fstl1b
abca2	9.50561e-17	0.120096	0.17	0.063	1.56025e-12	3	abca2
mdm4	9.534e-17	0.175813	0.2	0.081	1.56491e-12	3	mdm4
mycbp	1.21087e-16	0.191592	0.251	0.113	1.98752e-12	3	mycbp
scarb2a	1.21325e-16	0.146426	0.258	0.118	1.99143e-12	3	scarb2a
krtcap2	1.50884e-16	0.210268	0.361	0.191	2.4766e-12	3	krtcap2
boc	1.66235e-16	0.141519	0.233	0.103	2.72859e-12	3	boc
cpne1	1.87761e-16	0.225165	0.383	0.213	3.08191e-12	3	cpne1
dspa	2.75323e-16	0.22031	0.381	0.223	4.51916e-12	3	dspa
srgap2	2.97769e-16	0.146159	0.267	0.128	4.88759e-12	3	srgap2
zgc:175088	3.02202e-16	0.21193	0.293	0.144	4.96034e-12	3	zgc:175088
si:ch211-219a4.3	4.15455e-16	0.18033	0.26	0.125	6.81929e-12	3	si:ch211-219a4.3
rassf2a	4.89941e-16	0.132832	0.161	0.06	8.04189e-12	3	rassf2a
BX322530.1	5.70821e-16	0.114104	0.159	0.058	9.36946e-12	3	BX322530.1
emp21	7.47768e-16	0.202488	0.474	0.297	1.22739e-11	3	emp2
shroom4	9.7883e-16	0.155694	0.24	0.112	1.60665e-11	3	shroom4
slc7a6	1.18813e-15	0.156931	0.183	0.075	1.9502e-11	3	slc7a6
zgc:113208	1.26186e-15	0.104546	0.165	0.062	2.07121e-11	3	zgc:113208
hmgb1a	1.46808e-15	0.245197	0.535	0.344	2.4097e-11	3	hmgb1a
sec61a1	1.58987e-15	0.124199	0.17	0.064	2.60961e-11	3	sec61a1
FAT4	1.614e-15	0.112024	0.148	0.053	2.64922e-11	3	FAT4
si:ch211-114c12.2	1.77512e-15	0.210698	0.256	0.122	2.91368e-11	3	si:ch211-114c12.2
mcl1b1	2.08302e-15	0.245697	0.513	0.32	3.41906e-11	3	mcl1b
atl3	2.8305e-15	0.121876	0.203	0.084	4.64598e-11	3	atl3
gnai1	2.95502e-15	0.185606	0.328	0.182	4.85036e-11	3	gnai1
senp3a	3.39399e-15	0.147196	0.178	0.072	5.57089e-11	3	senp3a
tmem238a	3.48955e-15	0.130138	0.196	0.083	5.72775e-11	3	tmem238a
si:ch211-198m17.1	4.36928e-15	0.173848	0.203	0.089	7.17174e-11	3	si:ch211-198m17.1
napsa	4.92563e-15	0.145499	0.189	0.079	8.08493e-11	3	napsa
ifih1	5.41241e-15	0.116363	0.152	0.057	8.88392e-11	3	ifih1
si:ch73-46j18.5	5.73646e-15	0.234264	0.427	0.257	9.41582e-11	3	si:ch73-46j18.5
FO744833.2	5.86266e-15	0.212521	0.317	0.178	9.62297e-11	3	FO744833.2
csrnp1b1	6.00626e-15	0.162095	0.306	0.161	9.85867e-11	3	csrnp1b
slka	6.25862e-15	0.21193	0.324	0.185	1.02729e-10	3	slka
cdc42se1	9.43679e-15	0.132624	0.203	0.089	1.54895e-10	3	cdc42se1
lipf	1.10277e-14	0.127488	0.216	0.097	1.81008e-10	3	lipf
ddit31	1.21867e-14	0.249077	0.744	0.536	2.00033e-10	3	ddit3
epsti1	1.24509e-14	0.109121	0.154	0.058	2.04369e-10	3	epsti1
maff	1.29161e-14	0.213895	0.414	0.264	2.12005e-10	3	maff
u2surp	1.40365e-14	0.174379	0.317	0.169	2.30395e-10	3	u2surp
ppt11	1.82456e-14	0.210237	0.388	0.223	2.99483e-10	3	ppt1
irf9	1.88864e-14	0.171873	0.282	0.146	3.10001e-10	3	irf9
apol1	2.16261e-14	0.123169	0.161	0.063	3.5497e-10	3	apol1
sf3b1	2.74408e-14	0.160203	0.275	0.137	4.50414e-10	3	sf3b1
aqp121	2.80491e-14	0.180002	0.267	0.135	4.60398e-10	3	aqp12
mtpn	2.91416e-14	0.161116	0.291	0.146	4.7833e-10	3	mtpn
tagln21	3.22772e-14	0.217443	0.469	0.287	5.29798e-10	3	tagln2
vps28	3.29858e-14	0.120854	0.17	0.068	5.41429e-10	3	vps28
lama51	3.85649e-14	0.188981	0.778	0.564	6.33004e-10	3	lama5
lsr	4.12364e-14	0.141507	0.222	0.102	6.76854e-10	3	lsr
zgc:1230101	4.16979e-14	0.241188	0.452	0.301	6.8443e-10	3	zgc:123010
cavin2b1	5.16756e-14	0.248427	0.67	0.477	8.48203e-10	3	cavin2b
arpc3	5.84186e-14	0.227232	0.412	0.246	9.58883e-10	3	arpc3
higd1a	7.06734e-14	0.245572	0.526	0.353	1.16003e-09	3	higd1a
sptbn1	7.09949e-14	0.110407	0.148	0.057	1.16531e-09	3	sptbn1
sept8a	8.64312e-14	0.108705	0.143	0.053	1.41868e-09	3	sept8a
ubc1	1.03491e-13	0.256538	0.872	0.689	1.69871e-09	3	ubc
schip11	1.09557e-13	0.230171	0.548	0.395	1.79827e-09	3	schip1
fosl1a1	1.10153e-13	0.303833	0.762	0.58	1.80805e-09	3	fosl1a
zgc:92481	1.1165e-13	0.184782	0.295	0.162	1.83263e-09	3	zgc:92481
mical3b	1.13513e-13	0.110975	0.154	0.061	1.8632e-09	3	mical3b
marcksb	1.13573e-13	0.106362	0.055	0.01	1.86418e-09	3	marcksb
foxj3	1.41007e-13	0.138541	0.242	0.121	2.31449e-09	3	foxj3
leng8	1.45499e-13	0.10807	0.152	0.059	2.38822e-09	3	leng8
CU639397.1	1.51857e-13	0.109846	0.152	0.06	2.49257e-09	3	CU639397.1
irf2	1.75e-13	0.162333	0.315	0.176	2.87244e-09	3	irf2
rpz4	1.80561e-13	0.103317	0.143	0.055	2.96372e-09	3	rpz4
btr09	2.10442e-13	0.168529	0.313	0.176	3.45419e-09	3	btr09
SMIM22	2.18582e-13	0.110672	0.181	0.078	3.5878e-09	3	SMIM22
pim3	2.20049e-13	0.13503	0.181	0.076	3.61189e-09	3	pim3
glrx5	2.38545e-13	0.1745	0.339	0.188	3.91547e-09	3	glrx5
si:ch73-234b20.5	2.41236e-13	0.149301	0.273	0.145	3.95965e-09	3	si:ch73-234b20.5
gipc2	2.61666e-13	0.101549	0.159	0.064	4.29499e-09	3	gipc2
ak1	2.81225e-13	0.122233	0.148	0.057	4.61603e-09	3	ak1
net11	3.08745e-13	0.444293	0.509	0.393	5.06775e-09	3	net1
ascl1b	3.18381e-13	0.125934	0.192	0.087	5.2259e-09	3	ascl1b
h2afx1	3.30887e-13	0.317418	0.733	0.539	5.43118e-09	3	h2afx1
hsp70l1	3.60865e-13	0.258693	0.744	0.53	5.92323e-09	3	hsp70l
rnf130	4.14764e-13	0.153729	0.192	0.088	6.80794e-09	3	rnf130
h1fx1	4.67699e-13	0.26673	0.628	0.425	7.67681e-09	3	h1fx
btg22	5.40673e-13	0.261384	0.974	0.914	8.87461e-09	3	btg2
mxa	5.80163e-13	0.100828	0.141	0.054	9.52279e-09	3	mxa
srgap3	8.92995e-13	0.140402	0.222	0.11	1.46576e-08	3	srgap3
dhx58	9.08191e-13	0.115329	0.137	0.053	1.49071e-08	3	dhx58
prpf6	1.08947e-12	0.133911	0.189	0.087	1.78825e-08	3	prpf6
sri	1.14774e-12	0.173993	0.311	0.171	1.88389e-08	3	sri
afap1l2	1.23229e-12	0.108689	0.167	0.072	2.02269e-08	3	afap1l2
dio1	1.70079e-12	0.133217	0.205	0.098	2.79168e-08	3	dio1
h1f0	1.92352e-12	0.263993	0.817	0.632	3.15727e-08	3	h1f0
rtn1a	2.04494e-12	0.120387	0.227	0.113	3.35657e-08	3	rtn1a
btc	2.061e-12	0.109401	0.165	0.071	3.38293e-08	3	btc
anxa41	2.11211e-12	0.254442	0.485	0.329	3.46682e-08	3	anxa4
ctsh1	2.25264e-12	0.168192	0.333	0.198	3.69748e-08	3	ctsh
tpm3	2.2981e-12	0.249263	0.531	0.358	3.7721e-08	3	tpm3
ogt.1.1	2.32408e-12	0.111778	0.148	0.059	3.81474e-08	3	ogt.1.1
si:ch211-195b13.11	2.40873e-12	0.108416	0.119	0.043	3.95369e-08	3	si:ch211-195b13.1
ier2b2	2.57871e-12	0.253489	0.901	0.733	4.23269e-08	3	ier2b
ucp2	2.8843e-12	0.110156	0.143	0.056	4.73429e-08	3	ucp2
map7d1b	2.92402e-12	0.156721	0.306	0.177	4.79949e-08	3	map7d1b
ciarta	2.96739e-12	0.146478	0.247	0.125	4.87068e-08	3	ciarta
antxr2a1	3.30868e-12	0.124325	0.269	0.143	5.43087e-08	3	antxr2a
fam204a	3.38107e-12	0.179815	0.302	0.177	5.54968e-08	3	fam204a
nupr1a	3.72093e-12	0.16345	0.33	0.184	6.10753e-08	3	nupr1a
gsna	4.18839e-12	0.126324	0.22	0.11	6.87483e-08	3	gsna
dctn3	4.6371e-12	0.13716	0.247	0.125	7.61133e-08	3	dctn3
gadd45bb1	5.24582e-12	0.204843	0.247	0.125	8.61048e-08	3	gadd45bb
eef1db	5.73884e-12	0.256219	0.811	0.686	9.41974e-08	3	eef1db
rgs12a	6.92818e-12	0.132996	0.22	0.111	1.13719e-07	3	rgs12a
zgc:55461	7.50621e-12	0.137011	0.057	0.013	1.23207e-07	3	zgc:55461
si:ch211-106e7.2	8.75165e-12	0.118484	0.123	0.046	1.4365e-07	3	si:ch211-106e7.2
si:dkey-204f11.64	9.17085e-12	0.155496	0.273	0.153	1.5053e-07	3	si:dkey-204f11.64
irf7	9.43754e-12	0.101606	0.134	0.053	1.54908e-07	3	irf7
clk4a1	9.73992e-12	0.158453	0.308	0.173	1.59871e-07	3	clk4a
fam129bb	9.80808e-12	0.113713	0.174	0.078	1.6099e-07	3	fam129bb
nfkbib	1.0208e-11	0.152203	0.293	0.17	1.67555e-07	3	nfkbib
gig2o	1.15703e-11	0.133114	0.209	0.103	1.89915e-07	3	gig2o
pmp22b1	1.2217e-11	0.265354	0.412	0.26	2.00529e-07	3	pmp22b
hist1h4l.10	1.28378e-11	0.163588	0.348	0.214	2.1072e-07	3	hist1h4l.10
ddah2	1.49014e-11	0.134126	0.24	0.127	2.44592e-07	3	ddah2
sec61b	1.5837e-11	0.162555	0.286	0.157	2.59948e-07	3	sec61b
si:ch211-245h14.1	1.83839e-11	0.111385	0.174	0.08	3.01753e-07	3	si:ch211-245h14.1
lama4	1.86385e-11	0.125132	0.185	0.088	3.05933e-07	3	lama4
ube2e3	2.07705e-11	0.199573	0.562	0.39	3.40927e-07	3	ube2e3
zgc:63587	2.15638e-11	0.124821	0.218	0.112	3.53947e-07	3	zgc:63587
nenf	2.24073e-11	0.102947	0.141	0.058	3.67794e-07	3	nenf
mki67	2.41689e-11	0.124845	0.053	0.012	3.96708e-07	3	mki67
il15ra	4.23509e-11	0.150457	0.214	0.11	6.95148e-07	3	il15ra
mpzl2b1	4.25535e-11	0.228518	0.427	0.279	6.98473e-07	3	mpzl2b
sltm	4.2825e-11	0.14426	0.249	0.135	7.0293e-07	3	sltm
psme21	4.55546e-11	0.184335	0.328	0.194	7.47734e-07	3	psme2
stat2	4.65888e-11	0.172101	0.434	0.284	7.64708e-07	3	stat2
rhoac	4.80088e-11	0.136943	0.297	0.164	7.88017e-07	3	rhoac
hist2h2l1	4.85734e-11	0.249108	0.449	0.294	7.97283e-07	3	hist2h2l
ppp1r15a1	5.13689e-11	0.166992	0.324	0.196	8.43169e-07	3	ppp1r15a
socs1a	7.04227e-11	0.167869	0.154	0.069	1.15592e-06	3	socs1a
capn2a1	7.44365e-11	0.188622	0.359	0.234	1.2218e-06	3	capn2a
sh3pxd2b	7.84825e-11	0.109317	0.214	0.11	1.28821e-06	3	sh3pxd2b
gnsa	8.59001e-11	0.113739	0.222	0.117	1.40996e-06	3	gnsa
gadd45ba1	9.51359e-11	0.153129	0.945	0.774	1.56156e-06	3	gadd45ba
ptprk	1.08669e-10	0.121425	0.233	0.126	1.78369e-06	3	ptprk
akap8l	1.26188e-10	0.113978	0.167	0.077	2.07125e-06	3	akap8l
smdt1b	1.42925e-10	0.109154	0.187	0.09	2.34596e-06	3	smdt1b
rsrp11	1.44789e-10	0.243575	0.612	0.473	2.37657e-06	3	rsrp1
il151	1.65272e-10	0.10707	0.156	0.069	2.71277e-06	3	il15
zgc:194659	1.68954e-10	0.134775	0.24	0.131	2.77322e-06	3	zgc:194659
si:ch211-260e23.9	2.71116e-10	0.123722	0.238	0.131	4.4501e-06	3	si:ch211-260e23.9
btbd6b	2.76102e-10	0.151271	0.227	0.125	4.53193e-06	3	btbd6b
id11	2.86788e-10	0.386554	0.604	0.426	4.70734e-06	3	id1
phf11	2.86929e-10	0.115863	0.229	0.124	4.70966e-06	3	phf11
aldh9a1a.1	3.31725e-10	0.213683	0.797	0.647	5.44494e-06	3	aldh9a1a.1
flna	3.31857e-10	0.17506	0.324	0.196	5.4471e-06	3	flna
chmp5b	3.51308e-10	0.131438	0.271	0.151	5.76637e-06	3	chmp5b
prr13	3.65978e-10	0.145819	0.289	0.166	6.00716e-06	3	prr13
gata6	3.66646e-10	0.199965	0.487	0.333	6.01812e-06	3	gata6
loxl3b	3.92137e-10	0.106112	0.174	0.085	6.43654e-06	3	loxl3b
adh51	3.9847e-10	0.188613	0.531	0.368	6.54049e-06	3	adh5
cldn7b1	3.99945e-10	0.161715	0.205	0.105	6.5647e-06	3	cldn7b
gadd45ga	4.38983e-10	0.151417	0.053	0.013	7.20546e-06	3	gadd45ga
egr2a	4.46941e-10	0.195494	0.3	0.179	7.33608e-06	3	egr2a
rnd1b	5.39078e-10	0.136682	0.172	0.084	8.84843e-06	3	rnd1b
shc1	5.88593e-10	0.122048	0.233	0.131	9.66116e-06	3	shc1
ube2l3b	6.32516e-10	0.129459	0.216	0.113	1.03821e-05	3	ube2l3b
ptpn13	7.17722e-10	0.159578	0.363	0.24	1.17807e-05	3	ptpn13
ctnnd1	7.63327e-10	0.173263	0.302	0.179	1.25292e-05	3	ctnnd1
pdlim21	8.39706e-10	0.134231	0.194	0.1	1.37829e-05	3	pdlim2
parp12b	8.95187e-10	0.162727	0.273	0.162	1.46936e-05	3	parp12b
tbcb	9.64787e-10	0.126064	0.271	0.156	1.5836e-05	3	tbcb
sart1	9.84588e-10	0.100157	0.172	0.082	1.6161e-05	3	sart1
cmtm6	1.07128e-09	0.120101	0.244	0.133	1.7584e-05	3	cmtm6
ctnna1	1.09924e-09	0.102458	0.181	0.088	1.80429e-05	3	ctnna1
p4hb	1.22237e-09	0.147998	0.172	0.083	2.0064e-05	3	p4hb
ehd1b1	1.51705e-09	0.108308	0.174	0.087	2.49008e-05	3	ehd1b
metrnla	1.53248e-09	0.168174	0.242	0.141	2.51541e-05	3	metrnla
plxna4	1.75412e-09	0.207057	0.452	0.33	2.87922e-05	3	plxna4
rpl221	1.79795e-09	0.138813	0.991	0.984	2.95116e-05	3	rpl22
si:ch211-140m22.7	1.83439e-09	0.10291	0.196	0.099	3.01096e-05	3	si:ch211-140m22.7
neo1a	1.9519e-09	0.109725	0.249	0.142	3.20385e-05	3	neo1a
ifit16	1.97596e-09	0.10083	0.178	0.09	3.24334e-05	3	ifit16
cebpg	2.11616e-09	0.115545	0.238	0.13	3.47347e-05	3	cebpg
ubl3a	2.1482e-09	0.12858	0.271	0.163	3.52606e-05	3	ubl3a
axin1	2.4055e-09	0.117814	0.236	0.134	3.9484e-05	3	axin1
ier2a2	2.71834e-09	0.196271	0.866	0.688	4.46189e-05	3	ier2a
zgc:110239	2.87547e-09	0.116417	0.161	0.077	4.7198e-05	3	zgc:110239
pdia3	2.92628e-09	0.195312	0.449	0.311	4.80319e-05	3	pdia3
rab13	3.76614e-09	0.11071	0.198	0.107	6.18175e-05	3	rab13
MYADM	3.8093e-09	0.106704	0.218	0.121	6.25259e-05	3	MYADM
si:dkey-23k10.5	4.38122e-09	0.146428	0.295	0.186	7.19134e-05	3	si:dkey-23k10.5
CABZ01086029.1	4.81362e-09	0.147725	0.308	0.199	7.90108e-05	3	CABZ01086029.1
usf1l	4.8477e-09	0.109524	0.227	0.124	7.95702e-05	3	usf1l
acss1	4.90843e-09	0.104466	0.167	0.085	8.05669e-05	3	acss1
ahr2	5.49015e-09	0.127816	0.244	0.145	9.01153e-05	3	ahr2
tcf7l2	6.24253e-09	0.136618	0.295	0.188	0.000102465	3	tcf7l2
gstr	6.93734e-09	0.197068	0.524	0.387	0.000113869	3	gstr
cyfip1	7.63218e-09	0.125966	0.24	0.138	0.000125275	3	cyfip1
tubb2b	7.97054e-09	0.160662	0.148	0.07	0.000130828	3	tubb2b
si:ch211-213a13.11	9.44665e-09	0.103525	0.192	0.102	0.000155057	3	si:ch211-213a13.1
med19a	9.50715e-09	0.101119	0.152	0.073	0.00015605	3	med19a
dclk1a	9.8736e-09	0.1541	0.205	0.113	0.000162065	3	dclk1a
ppp3ccb	9.90849e-09	0.105214	0.209	0.117	0.000162638	3	ppp3ccb
prkar2aa	1.16087e-08	0.155184	0.244	0.143	0.000190546	3	prkar2aa
ogfrl2	1.18886e-08	0.119979	0.196	0.108	0.00019514	3	ogfrl2
dynlt3	1.23694e-08	0.142469	0.324	0.204	0.000203031	3	dynlt3
si:ch211-132p1.31	1.40666e-08	0.179167	0.324	0.2	0.00023089	3	si:ch211-132p1.3
relb	1.43704e-08	0.120302	0.256	0.156	0.000235876	3	relb
tpm4a1	2.02151e-08	0.154353	0.674	0.497	0.000331811	3	tpm4a
si:ch211-181d7.3	2.046e-08	0.143743	0.374	0.261	0.000335831	3	si:ch211-181d7.3
ckap4	2.13979e-08	0.110211	0.229	0.135	0.000351225	3	ckap4
asah1b	2.39415e-08	0.135644	0.297	0.19	0.000392975	3	asah1b
tent5ba1	2.59191e-08	0.120761	0.293	0.183	0.000425436	3	tent5ba
mmp2	2.65202e-08	0.210402	0.643	0.515	0.000435302	3	mmp2
rgs5b	2.67588e-08	0.202894	0.117	0.053	0.00043922	3	rgs5b
tob1a1	3.10359e-08	0.245411	0.357	0.247	0.000509424	3	tob1a
amotl2a1	3.15364e-08	0.201497	0.344	0.224	0.000517638	3	amotl2a
bbip1	3.83786e-08	0.101575	0.161	0.082	0.000629946	3	bbip1
rras	4.36343e-08	0.137121	0.275	0.166	0.000716213	3	rras
sntb2	4.48174e-08	0.121236	0.284	0.181	0.000735633	3	sntb2
trappc1	4.49422e-08	0.108058	0.196	0.107	0.000737682	3	trappc1
coro1ca	4.6191e-08	0.131965	0.262	0.158	0.000758179	3	coro1ca
zbtb4	5.32231e-08	0.117149	0.297	0.192	0.000873604	3	zbtb4
hmgb2a	5.64562e-08	0.280994	0.412	0.275	0.000926671	3	hmgb2a
dusp6	5.91949e-08	0.165437	0.236	0.144	0.000971625	3	dusp6
tuba8l41	7.20302e-08	0.147994	0.588	0.407	0.0011823	3	tuba8l4
gabarapl2	8.31219e-08	0.112565	0.275	0.168	0.00136436	3	gabarapl2
sfpq	9.87252e-08	0.105507	0.178	0.097	0.00162048	3	sfpq
psmf1	1.04584e-07	0.131164	0.231	0.142	0.00171665	3	psmf1
atf7ip	1.0988e-07	0.111492	0.238	0.14	0.00180357	3	atf7ip
rplp21	1.1252e-07	0.140076	0.976	0.933	0.0018469	3	rplp2
tspan9b	1.15496e-07	0.10752	0.198	0.114	0.00189575	3	tspan9b
cdc42l	1.31891e-07	0.141113	0.379	0.252	0.00216487	3	cdc42l
sema4ab	1.74087e-07	0.115556	0.2	0.119	0.00285747	3	sema4ab
ctsba1	1.76459e-07	0.164366	0.291	0.179	0.00289639	3	ctsba
BX936337.1	2.47143e-07	0.113662	0.253	0.155	0.0040566	3	BX936337.1
nktr	2.49875e-07	0.143543	0.302	0.205	0.00410146	3	nktr
ccng1	2.74484e-07	0.166164	0.597	0.447	0.00450538	3	ccng1
syf2	2.75484e-07	0.110239	0.344	0.226	0.00452179	3	syf2
phlda1	2.88411e-07	0.100249	0.167	0.092	0.00473397	3	phlda1
map1lc3b	2.99347e-07	0.106771	0.339	0.232	0.00491349	3	map1lc3b
sox11a1	3.45636e-07	0.106132	0.256	0.16	0.00567328	3	sox11a
gas1b1	3.73949e-07	0.127215	0.319	0.22	0.006138	3	gas1b
chd6	4.04755e-07	0.104801	0.262	0.169	0.00664365	3	chd6
lcorl	5.44744e-07	0.114825	0.238	0.151	0.00894143	3	lcorl
ncor1	5.58385e-07	0.120246	0.313	0.207	0.00916532	3	ncor1
si:dkey-37o8.1	7.0364e-07	0.202207	0.064	0.024	0.0115495	3	si:dkey-37o8.1
lhfpl2b	7.20183e-07	0.101817	0.24	0.153	0.0118211	3	lhfpl2b
htatip2	7.33311e-07	0.100941	0.236	0.146	0.0120366	3	htatip2
jupa	9.1246e-07	0.100941	0.284	0.191	0.0149771	3	jupa
ctss2.1	9.80248e-07	0.141065	0.104	0.048	0.0160898	3	ctss2.1
gdi1	1.01891e-06	0.114286	0.249	0.162	0.0167243	3	gdi1
stat1a1	1.04762e-06	0.142682	0.74	0.589	0.0171957	3	stat1a
si:dkey-23i12.71	1.20742e-06	0.160145	0.194	0.116	0.0198186	3	si:dkey-23i12.7
cbx1b	1.42751e-06	0.103472	0.251	0.164	0.0234311	3	cbx1b
serpinb1	1.44886e-06	0.12956	0.553	0.416	0.0237816	3	serpinb1
arhgap5	1.71283e-06	0.114615	0.355	0.257	0.0281144	3	arhgap5
ssr3	1.88569e-06	0.141244	0.548	0.422	0.0309518	3	ssr3
calm1a1	2.0385e-06	0.125546	0.557	0.41	0.0334599	3	calm1a
hnrnpa0a	2.06971e-06	0.123196	0.273	0.183	0.0339721	3	hnrnpa0a
lsp11	2.41837e-06	0.108251	0.293	0.2	0.0396951	3	lsp1
psme1	2.66078e-06	0.112056	0.319	0.217	0.0436741	3	psme1
gabarapa	2.69837e-06	0.113064	0.405	0.282	0.0442911	3	gabarapa
tmem79b	2.82354e-06	0.113454	0.278	0.193	0.0463456	3	tmem79b
tmem50a	4.17806e-06	0.106354	0.337	0.23	0.0685787	3	tmem50a
srrm1	4.2577e-06	0.126712	0.379	0.267	0.0698859	3	srrm1
alyref	4.86201e-06	0.135406	0.262	0.168	0.079805	3	alyref
lamp2	5.22864e-06	0.118257	0.079	0.035	0.0858229	3	lamp2
ccni	5.50153e-06	0.142555	0.738	0.604	0.0903021	3	ccni
dhrs13l11	5.52022e-06	0.123945	0.304	0.218	0.090609	3	dhrs13l1
tmem591	5.56804e-06	0.101907	0.335	0.227	0.0913939	3	tmem59
anxa11b	5.95523e-06	0.111985	0.366	0.255	0.0977491	3	anxa11b
flot1b	6.25165e-06	0.113387	0.3	0.201	0.102615	3	flot1b
hsp70.11	6.26568e-06	0.138942	0.947	0.838	0.102845	3	hsp70.1
fzd7b	8.58905e-06	0.10242	0.192	0.122	0.140981	3	fzd7b
h1m	8.59043e-06	0.232761	0.07	0.03	0.141003	3	h1m
cnp	9.39518e-06	0.157179	0.436	0.323	0.154213	3	cnp
tead1b1	9.95446e-06	0.11448	0.377	0.281	0.163393	3	tead1b
si:ch211-288g17.3	1.08384e-05	0.235642	0.381	0.288	0.177901	3	si:ch211-288g17.3
ube2c	1.11332e-05	0.121271	0.057	0.023	0.182741	3	ube2c
tnrc6a	1.56309e-05	0.108016	0.361	0.259	0.256565	3	tnrc6a
ifi351	1.62137e-05	0.125297	0.35	0.267	0.266131	3	ifi35
sh3bgrl	1.66329e-05	0.108698	0.311	0.229	0.273012	3	sh3bgrl
cldng	1.70968e-05	0.220604	0.051	0.019	0.280627	3	cldng
zc3h7ba	1.89105e-05	0.102588	0.218	0.146	0.310397	3	zc3h7ba
ptmab1	1.93641e-05	0.136748	0.747	0.587	0.317842	3	ptmab
sumo2b1	2.23653e-05	0.10776	0.383	0.28	0.367104	3	sumo2b
ddx5	2.98343e-05	0.129338	0.399	0.294	0.4897	3	ddx5
ssr2	3.02865e-05	0.112596	0.469	0.353	0.497122	3	ssr2
sub1b	4.9527e-05	0.102128	0.244	0.165	0.812936	3	sub1b
ube2v1	5.43611e-05	0.105341	0.385	0.281	0.892284	3	ube2v1
hspb12	6.10872e-05	0.287072	0.678	0.568	1	3	hspb1
clic4	6.17096e-05	0.103028	0.251	0.176	1	3	clic4
ywhaqa	7.64307e-05	0.141579	0.436	0.341	1	3	ywhaqa
hsp70.31	9.81422e-05	0.123998	0.93	0.817	1	3	hsp70.3
rab5c	0.000111133	0.10207	0.278	0.196	1	3	rab5c
irf2bpl1	0.000112695	0.102381	0.313	0.236	1	3	irf2bpl
cnn21	0.000133027	0.147265	0.454	0.353	1	3	cnn2
egfra1	0.000253182	0.136915	0.396	0.323	1	3	egfra
ywhabl	0.000266277	0.105813	0.601	0.492	1	3	ywhabl
si:ch211-226h8.14	0.000388834	0.121157	0.051	0.023	1	3	si:ch211-226h8.14
zp3.21	0.00039079	0.282447	0.075	0.039	1	3	zp3.2
pfn21	0.000396092	0.111365	0.595	0.457	1	3	pfn2
hmgn6	0.000544076	0.124991	0.852	0.757	1	3	hmgn6
tiparp1	0.000884164	0.10594	0.315	0.251	1	3	tiparp
bhlhe401	0.0012735	0.166072	0.689	0.597	1	3	bhlhe40
zp3	0.00158287	0.126465	0.059	0.031	1	3	zp3
org	0.00189033	0.125379	0.07	0.039	1	3	org
ppib	0.00300998	0.116054	0.852	0.77	1	3	ppib
si:dkey-19b23.11	0.00483758	0.115439	0.059	0.033	1	3	si:dkey-19b23.11
zgc:171977	0.00493764	0.125946	0.055	0.03	1	3	zgc:171977
zp2.5	0.005183	0.162421	0.053	0.029	1	3	zp2.5
zp3a.11	0.00598757	0.105231	0.055	0.03	1	3	zp3a.1

## Sheet: Unknown (pink)
Note: Subcluster 5 (pink) cells are likely cell doublets between follicle cells and interstial stromal cells, as they contain markers of both cell types.
	p_val	avg_logFC	pct.1	pct.2	p_val_adj	cluster	gene
osr2	0	0.825705	0.479	0.003	0	5	osr2
ndnf	0	0.999848	0.507	0.004	0	5	ndnf
c6.1	0	0.991625	0.606	0.004	0	5	c6.1
nid1b	0	1.40373	0.803	0.018	0	5	nid1b
cxcl12a	2.39509e-271	1.34486	0.521	0.007	3.9313e-267	5	cxcl12a
nid2a	1.25823e-264	0.725915	0.465	0.005	2.06526e-260	5	nid2a
tmem88b1	3.69801e-263	1.47067	0.845	0.029	6.06991e-259	5	tmem88b
BX569787.1	3.65083e-252	0.60785	0.38	0.003	5.99247e-248	5	BX569787.1
CR751602.2	1.64192e-239	0.614291	0.394	0.004	2.69505e-235	5	CR751602.2
ITLN1 (1 of many).1	3.21677e-237	0.467688	0.437	0.005	5.28001e-233	5	ITLN1 (1 of many).1
si:ch1073-459j12.1	1.25396e-219	0.395626	0.408	0.005	2.05825e-215	5	si:ch1073-459j12.1
dcn	8.7832e-218	0.510148	0.423	0.006	1.44167e-213	5	dcn
nrxn1a	2.66712e-204	0.338289	0.352	0.004	4.37781e-200	5	nrxn1a
cd248a	2.34651e-201	0.598349	0.521	0.012	3.85157e-197	5	cd248a
fabp11a	1.00347e-199	1.40315	0.521	0.012	1.64709e-195	5	fabp11a
col1a1a1	2.63125e-195	1.1532	0.746	0.031	4.31893e-191	5	col1a1a
col1a1b1	3.75991e-175	1.23134	0.775	0.04	6.17152e-171	5	col1a1b
krt151	1.89825e-166	1.53624	0.69	0.032	3.11579e-162	5	krt15
tfpia	6.17333e-162	0.949632	0.577	0.022	1.01329e-157	5	tfpia
pcdh7a	6.54372e-143	0.255839	0.268	0.003	1.07409e-138	5	pcdh7a
col1a2	1.11296e-138	0.813991	0.394	0.011	1.82682e-134	5	col1a2
nr2f1a	5.8763e-137	0.419587	0.324	0.006	9.64536e-133	5	nr2f1a
col12a1b	1.91756e-134	0.265485	0.268	0.004	3.14749e-130	5	col12a1b
col6a31	1.09863e-126	0.754499	0.451	0.017	1.8033e-122	5	col6a3
cd1511	9.7213e-124	0.730119	0.592	0.032	1.59565e-119	5	cd151
nr2f2	4.6973e-119	0.673099	0.535	0.027	7.71014e-115	5	nr2f2
mfap2	5.96473e-108	0.633256	0.451	0.021	9.79051e-104	5	mfap2
b3gnt5a	9.45509e-105	0.242581	0.254	0.005	1.55196e-100	5	b3gnt5a
c4	3.22745e-97	0.315062	0.254	0.006	5.29753e-93	5	c4
postnb1	1.93773e-89	0.590273	0.507	0.033	3.18059e-85	5	postnb
wnt11r	2.54071e-88	0.211154	0.183	0.003	4.17033e-84	5	wnt11r
mdka	2.54319e-88	0.457018	0.183	0.003	4.17439e-84	5	mdka
adma	2.85255e-88	0.975235	0.479	0.03	4.68218e-84	5	adma
col5a2a1	6.56599e-86	0.439302	0.394	0.02	1.07774e-81	5	col5a2a
kirrel1b	8.94959e-85	0.165101	0.183	0.003	1.46899e-80	5	kirrel1b
col6a21	1.2551e-84	0.443625	0.465	0.029	2.06012e-80	5	col6a2
jam2b1	4.53235e-83	0.737309	0.451	0.028	7.43941e-79	5	jam2b
tmem176	5.57075e-81	0.418257	0.423	0.025	9.14384e-77	5	tmem176
acvrl1	2.5094e-78	0.152658	0.169	0.003	4.11894e-74	5	acvrl1
vstm4a	7.7575e-77	0.175537	0.197	0.004	1.27332e-72	5	vstm4a
tnfaip6	1.87588e-76	0.241187	0.225	0.006	3.07907e-72	5	tnfaip6
apof	2.88697e-76	0.209059	0.211	0.005	4.73868e-72	5	apof
notum1b1	1.05737e-71	0.423957	0.324	0.016	1.73557e-67	5	notum1b
col5a11	8.23151e-68	0.586641	0.451	0.035	1.35112e-63	5	col5a1
zfpm2a	8.46755e-67	0.130133	0.127	0.002	1.38986e-62	5	zfpm2a
podxl1	1.08964e-65	1.47126	0.845	0.158	1.78854e-61	5	podxl
pcdh10b	1.38825e-65	0.153824	0.141	0.002	2.27868e-61	5	pcdh10b
ntd5	9.05607e-65	0.385884	0.352	0.022	1.48646e-60	5	ntd5
c6	5.09892e-63	0.14077	0.155	0.003	8.36937e-59	5	c6
vegfd	3.68942e-62	0.163935	0.169	0.004	6.05581e-58	5	vegfd
si:ch1073-291c23.21	5.39007e-62	0.349813	0.408	0.031	8.84726e-58	5	si:ch1073-291c23.2
ism1	3.31356e-61	0.219196	0.197	0.006	5.43888e-57	5	ism1
fibinb	2.19006e-60	0.230834	0.183	0.005	3.59476e-56	5	fibinb
tagln	2.88721e-60	0.811806	0.296	0.016	4.73907e-56	5	tagln
klf2a	1.24633e-59	0.460502	0.211	0.008	2.04573e-55	5	klf2a
hic1	1.81298e-59	0.165101	0.141	0.003	2.97582e-55	5	hic1
fibina	2.27613e-59	0.128733	0.141	0.003	3.73605e-55	5	fibina
colec12	3.93445e-58	0.242867	0.282	0.015	6.45801e-54	5	colec12
tbx2a	9.17267e-57	0.176702	0.141	0.003	1.5056e-52	5	tbx2a
caskin1	1.00792e-54	0.252758	0.282	0.016	1.6544e-50	5	caskin1
tmem981	3.29697e-52	0.295651	0.394	0.034	5.41164e-48	5	tmem98
AL954191.1	1.30348e-50	0.234093	0.127	0.003	2.13953e-46	5	AL954191.1
mfap51	2.70528e-50	0.385191	0.338	0.027	4.44045e-46	5	mfap5
anxa1a1	8.08157e-49	0.812126	0.563	0.074	1.32651e-44	5	anxa1a
boc1	3.18213e-48	0.599693	0.648	0.108	5.22314e-44	5	boc
rbp4	5.06111e-48	0.580431	0.141	0.004	8.30731e-44	5	rbp4
krt941	3.69035e-47	0.955904	0.62	0.092	6.05734e-43	5	krt94
col6a11	2.1977e-45	0.472874	0.352	0.031	3.60731e-41	5	col6a1
rock2b.1	5.2976e-44	0.281848	0.324	0.028	8.69548e-40	5	rock2b.1
kank21	1.10082e-43	0.271712	0.324	0.028	1.80689e-39	5	kank2
lingo2a	1.10916e-43	0.105132	0.085	0.001	1.82057e-39	5	lingo2a
il152	3.31354e-43	0.702369	0.507	0.071	5.43884e-39	5	il15
aebp1	4.53578e-43	0.320897	0.324	0.029	7.44503e-39	5	aebp1
cyp2ad2	4.58305e-42	0.105833	0.07	0.001	7.52262e-38	5	cyp2ad2
plpp1a1	6.0326e-42	1.22364	0.859	0.239	9.90191e-38	5	plpp1a
myca	7.06552e-40	0.277907	0.352	0.036	1.15973e-35	5	myca
si:ch211-222l21.12	7.7902e-40	0.820587	0.789	0.167	1.27868e-35	5	si:ch211-222l21.1
sorbs1	1.37916e-38	0.291197	0.352	0.038	2.26376e-34	5	sorbs1
cdh21	4.63738e-38	0.557099	0.634	0.125	7.61179e-34	5	cdh2
tmem200b1	7.77866e-38	0.25795	0.254	0.02	1.27679e-33	5	tmem200b
tnfsf121	2.14132e-36	0.481467	0.507	0.082	3.51477e-32	5	tnfsf12
add3b1	4.71816e-36	0.19451	0.239	0.018	7.74439e-32	5	add3b
lxn	1.17558e-35	0.748283	0.803	0.211	1.9296e-31	5	lxn
fstl1b1	1.36093e-35	0.471404	0.521	0.088	2.23383e-31	5	fstl1b
krt18b1	1.79446e-35	0.667173	0.507	0.077	2.94542e-31	5	krt18b
wls1	2.21376e-35	0.502619	0.549	0.093	3.63367e-31	5	wls
krt91	2.25333e-35	0.981393	0.169	0.009	3.69862e-31	5	krt91
entpd11	9.96312e-35	0.493407	0.479	0.076	1.63535e-30	5	entpd1
bhmt	3.10711e-34	0.217442	0.211	0.015	5.1e-30	5	bhmt
epha4a1	4.68738e-33	0.206269	0.225	0.018	7.69387e-29	5	epha4a
phc2a1	7.69435e-33	0.635906	0.394	0.056	1.26295e-28	5	phc2a
slc29a1a1	1.33571e-32	0.658598	0.662	0.15	2.19244e-28	5	slc29a1a
meis1a	1.46389e-32	0.146153	0.169	0.01	2.40283e-28	5	meis1a
pdgfrb	2.19135e-32	0.377734	0.493	0.085	3.59689e-28	5	pdgfrb
dkk3b1	3.75067e-32	0.429515	0.366	0.047	6.15634e-28	5	dkk3b
aoc2	9.02268e-32	0.180965	0.085	0.002	1.48098e-27	5	aoc2
bnc21	9.81079e-32	0.309924	0.465	0.073	1.61034e-27	5	bnc2
tgm1l11	1.12819e-31	0.350578	0.352	0.046	1.85181e-27	5	tgm1l1
ripply1	6.52735e-31	0.206967	0.141	0.007	1.0714e-26	5	ripply1
rgs7bpb	2.10828e-30	0.208537	0.268	0.028	3.46053e-26	5	rgs7bpb
si:dkey-56m19.52	2.62714e-30	0.559402	0.507	0.096	4.31218e-26	5	si:dkey-56m19.5
mao1	4.64358e-30	0.264249	0.296	0.034	7.62196e-26	5	mao
si:dkey-195m11.81	1.40063e-29	0.19451	0.211	0.018	2.299e-25	5	si:dkey-195m11.8
ftr821	4.47507e-29	0.33389	0.408	0.064	7.34538e-25	5	ftr82
cpxm1a	1.35259e-28	0.135422	0.141	0.008	2.22014e-24	5	cpxm1a
pmp22a1	1.69612e-27	0.779347	0.761	0.235	2.78402e-23	5	pmp22a
sertad4	3.1257e-27	0.144533	0.155	0.01	5.13053e-23	5	sertad4
abl2	8.23997e-27	0.248384	0.31	0.042	1.35251e-22	5	abl2
cyp2p6	3.05989e-26	0.209945	0.183	0.015	5.02251e-22	5	cyp2p6
cyp2p7	3.56292e-26	0.132874	0.155	0.011	5.84817e-22	5	cyp2p7
apcdd1l	1.02109e-25	0.144302	0.155	0.011	1.67602e-21	5	apcdd1l
hdlbpa1	2.11585e-25	0.4098	0.423	0.077	3.47295e-21	5	hdlbpa
ace1	2.02917e-24	0.314969	0.324	0.049	3.33068e-20	5	ace
tnfsf10l	2.34105e-24	0.148239	0.127	0.008	3.84261e-20	5	tnfsf10l
scn4ba	2.45696e-23	0.132643	0.141	0.01	4.03286e-19	5	scn4ba
ecm2	4.65456e-23	0.205812	0.239	0.029	7.64e-19	5	ecm2
serpine3	8.5429e-23	0.119217	0.141	0.01	1.40223e-18	5	serpine3
fzd2	1.90506e-22	0.245719	0.324	0.053	3.12696e-18	5	fzd2
pleca1	2.69519e-22	0.378645	0.521	0.125	4.42388e-18	5	pleca
mxra8b	1.54971e-21	0.141531	0.155	0.013	2.54369e-17	5	mxra8b
nt5e	3.10075e-21	0.152125	0.169	0.016	5.08957e-17	5	nt5e
cyp19a1a	7.57571e-21	0.538279	0.169	0.017	1.24348e-16	5	cyp19a1a
CR936442.1	9.19929e-21	0.109339	0.07	0.003	1.50997e-16	5	CR936442.1
celf21	1.32656e-20	0.255696	0.366	0.071	2.17742e-16	5	celf2
sox4a.11	1.44358e-20	0.306958	0.282	0.043	2.36949e-16	5	sox4a.1
BX088707.3	1.77065e-20	0.159519	0.085	0.004	2.90635e-16	5	BX088707.3
mxra8a1	2.28839e-20	0.282548	0.437	0.093	3.75616e-16	5	mxra8a
gli2a1	1.32968e-19	0.118755	0.141	0.012	2.18253e-15	5	gli2a
fabp31	1.3427e-19	0.425096	0.62	0.182	2.20391e-15	5	fabp3
eva1ba	1.95459e-19	0.190621	0.197	0.024	3.20827e-15	5	eva1ba
ywhag1	1.27684e-18	0.249217	0.366	0.077	2.0958e-14	5	ywhag1
ugt1b51	2.58599e-18	0.222634	0.268	0.044	4.24465e-14	5	ugt1b5
CR383676.12	1.62295e-17	0.377046	1	1	2.66392e-13	5	CR383676.1
vat12	3.47347e-17	0.663294	0.648	0.221	5.70135e-13	5	vat1
rbfox11	5.13061e-17	0.173414	0.225	0.034	8.42138e-13	5	rbfox1
dpp3	9.90443e-17	0.222962	0.113	0.009	1.62571e-12	5	dpp3
anos1b	1.21585e-16	0.122456	0.113	0.009	1.9957e-12	5	anos1b
col27a1b1	1.55602e-16	0.229953	0.268	0.048	2.55405e-12	5	col27a1b
si:ch211-212k18.8	1.7418e-16	0.244065	0.366	0.085	2.85899e-12	5	si:ch211-212k18.8
c7a1	2.79329e-16	0.2152	0.282	0.053	4.58491e-12	5	c7a
CR848833.1	3.86234e-16	0.194093	0.239	0.04	6.33964e-12	5	CR848833.1
prss23	4.26308e-16	0.201392	0.282	0.054	6.99742e-12	5	prss23
rdh10a1	4.95754e-15	0.25638	0.338	0.079	8.13731e-11	5	rdh10a
cyp2ad3	5.57886e-15	0.310547	0.38	0.099	9.15714e-11	5	cyp2ad3
tjp2b1	2.61299e-14	0.403298	0.479	0.149	4.28897e-10	5	tjp2b
pigr1	3.11544e-14	0.104026	0.127	0.014	5.11369e-10	5	pigr
sox61	3.23789e-14	0.263451	0.394	0.105	5.31467e-10	5	sox6
CR356233.1	5.85658e-14	0.164651	0.127	0.014	9.61299e-10	5	CR356233.1
ccn2a1	6.37243e-14	0.506279	0.254	0.05	1.04597e-09	5	ccn2a
sesn1	6.51737e-14	0.16189	0.113	0.011	1.06976e-09	5	sesn1
lrrtm2	1.66523e-13	0.119679	0.113	0.012	2.73331e-09	5	lrrtm2
robo2.1	2.43646e-13	0.164253	0.239	0.047	3.99921e-09	5	robo2.1
rab5b	4.01924e-13	0.352285	0.38	0.112	6.59718e-09	5	rab5b
ppdpfb1	4.66882e-13	0.457835	0.549	0.185	7.66339e-09	5	ppdpfb
col18a1a2	9.04146e-13	0.442	0.324	0.087	1.48407e-08	5	col18a1a
palm1b	9.50323e-13	0.150015	0.141	0.019	1.55986e-08	5	palm1b
tns1b	1.0433e-12	0.143453	0.197	0.035	1.71248e-08	5	tns1b
cd81a1	1.1255e-12	0.482293	0.972	0.797	1.84739e-08	5	cd81a
rab6bb	1.51455e-12	0.128022	0.169	0.027	2.48597e-08	5	rab6bb
tspan18b2	1.8072e-12	0.370294	0.465	0.151	2.96634e-08	5	tspan18b
si:dkeyp-75h12.51	2.59565e-12	0.302072	0.352	0.097	4.2605e-08	5	si:dkeyp-75h12.5
si:ch211-286o17.1	2.70045e-12	0.219293	0.225	0.046	4.43252e-08	5	si:ch211-286o17.1
pcolcea	3.71069e-12	0.113981	0.07	0.005	6.09072e-08	5	pcolcea
ccbe11	5.36954e-12	0.235598	0.38	0.113	8.81356e-08	5	ccbe1
CT573344.1	7.5778e-12	0.105409	0.113	0.013	1.24382e-07	5	CT573344.1
ptprk1	7.75865e-12	0.271455	0.408	0.132	1.27351e-07	5	ptprk
lin7a	8.96077e-12	0.197998	0.225	0.048	1.47082e-07	5	lin7a
socs3b1	1.1732e-11	0.377582	0.254	0.06	1.92569e-07	5	socs3b
grhl11	1.20948e-11	0.147287	0.197	0.037	1.98524e-07	5	grhl1
rnd3b1	1.29926e-11	0.186276	0.239	0.053	2.1326e-07	5	rnd3b
CPNE8	1.36805e-11	0.206908	0.282	0.071	2.24552e-07	5	CPNE8
si:ch211-183d5.2	1.88635e-11	0.135055	0.127	0.017	3.09626e-07	5	si:ch211-183d5.2
rgmb	2.55139e-11	0.261363	0.324	0.093	4.18786e-07	5	rgmb
ccn12	2.55647e-11	0.800882	0.451	0.166	4.19619e-07	5	ccn1
ccdc85ca	2.59261e-11	0.17622	0.225	0.049	4.25551e-07	5	ccdc85ca
capns1b2	3.11275e-11	0.370652	0.676	0.297	5.10927e-07	5	capns1b
cd632	3.3127e-11	0.35165	0.746	0.338	5.43747e-07	5	cd63
selenbp11	3.48858e-11	0.303219	0.268	0.068	5.72616e-07	5	selenbp1
si:dkey-192g7.3	5.17427e-11	0.163833	0.225	0.05	8.49304e-07	5	si:dkey-192g7.3
ahnak1	5.99437e-11	0.359212	0.704	0.311	9.83916e-07	5	ahnak
map2k6	6.89143e-11	0.358317	0.423	0.147	1.13116e-06	5	map2k6
axin21	1.0921e-10	0.260481	0.423	0.148	1.79257e-06	5	axin2
cdr2l	1.18167e-10	0.138953	0.197	0.04	1.9396e-06	5	cdr2l
glis2a1	1.28414e-10	0.150603	0.225	0.051	2.10779e-06	5	glis2a
lamb1b1	1.37907e-10	0.135234	0.169	0.031	2.2636e-06	5	lamb1b
si:ch73-46j18.51	2.14604e-10	0.376752	0.606	0.269	3.52251e-06	5	si:ch73-46j18.5
adamts9	2.17661e-10	0.243209	0.296	0.085	3.57269e-06	5	adamts9
nid1a1	2.47135e-10	0.248508	0.38	0.125	4.05647e-06	5	nid1a
cav11	3.00957e-10	0.305183	0.451	0.162	4.93992e-06	5	cav1
p3h21	3.16629e-10	0.103403	0.141	0.023	5.19715e-06	5	p3h2
BX322530.11	3.45866e-10	0.206908	0.254	0.065	5.67705e-06	5	BX322530.1
kcnip1b1	4.24576e-10	0.10865	0.155	0.027	6.96899e-06	5	kcnip1b
antxr2a2	7.83875e-10	0.222105	0.423	0.152	1.28665e-05	5	antxr2a
lurap11	8.32992e-10	0.120094	0.169	0.033	1.36727e-05	5	lurap1
ssuh2rs1	8.97279e-10	0.182954	0.366	0.119	1.47279e-05	5	ssuh2rs1
aplp11	1.24308e-09	0.157859	0.155	0.029	2.04039e-05	5	aplp1
ier5l1	1.6728e-09	0.173499	0.113	0.017	2.74573e-05	5	ier5l
eif4a21	1.80197e-09	0.308369	0.437	0.165	2.95775e-05	5	eif4a2
si:ch211-132b12.71	1.83957e-09	0.257785	0.521	0.218	3.01947e-05	5	si:ch211-132b12.7
ngdn	1.85451e-09	0.203797	0.31	0.092	3.04399e-05	5	ngdn
tpm4b	1.90414e-09	0.143713	0.197	0.045	3.12546e-05	5	tpm4b
gulp1a1	2.04642e-09	0.282131	0.521	0.223	3.35899e-05	5	gulp1a
cavin2b2	2.09786e-09	0.471629	0.817	0.492	3.44342e-05	5	cavin2b
thbs1b	2.16365e-09	0.138539	0.085	0.01	3.55141e-05	5	thbs1b
adipor2	2.61548e-09	0.300086	0.324	0.104	4.29304e-05	5	adipor2
olfml3b1	3.71455e-09	0.224822	0.366	0.129	6.09706e-05	5	olfml3b
si:ch211-212k18.9	3.78485e-09	0.175886	0.225	0.058	6.21246e-05	5	si:ch211-212k18.9
eef1da1	4.76486e-09	0.417202	0.915	0.595	7.82104e-05	5	eef1da
palld	4.78155e-09	0.147928	0.225	0.057	7.84844e-05	5	palld
eif4ebp3	4.85371e-09	0.362289	0.732	0.367	7.96689e-05	5	eif4ebp3
marcksa1	4.87084e-09	0.103631	0.141	0.026	7.995e-05	5	marcksa
rgma	5.06892e-09	0.19493	0.296	0.091	8.32012e-05	5	rgma
clk4a2	5.73407e-09	0.265483	0.465	0.183	9.4119e-05	5	clk4a
bsg1	6.26508e-09	0.38311	0.704	0.38	0.000102835	5	bsg
fbxo25	6.35647e-09	0.223226	0.338	0.113	0.000104335	5	fbxo25
stxbp6	7.27934e-09	0.169413	0.268	0.077	0.000119483	5	stxbp6
gbp3	1.03123e-08	0.24974	0.296	0.093	0.000169265	5	gbp
hbegfa1	1.1199e-08	0.272818	0.296	0.089	0.00018382	5	hbegfa
slc29a41	1.20505e-08	0.116679	0.099	0.014	0.000197796	5	slc29a4
pip4k2ca	1.44935e-08	0.225491	0.423	0.167	0.000237896	5	pip4k2ca
bmp41	1.55362e-08	0.310809	0.423	0.177	0.000255012	5	bmp4
pdgfc	1.60913e-08	0.11091	0.155	0.032	0.000264122	5	pdgfc
cxcl18b1	1.7389e-08	0.351394	0.38	0.135	0.000285423	5	cxcl18b
zeb2b	1.77386e-08	0.242995	0.408	0.161	0.000291162	5	zeb2b
anxa5b1	1.92044e-08	0.1879	0.254	0.072	0.00031522	5	anxa5b
pard6a1	2.09073e-08	0.134026	0.183	0.043	0.000343172	5	pard6a
2020-09-02	2.74345e-08	0.276886	0.324	0.112	0.000450309	5	2020-09-02
myl9b2	3.08204e-08	0.294334	0.577	0.261	0.000505886	5	myl9b
col12a1a2	3.12722e-08	0.248654	0.366	0.135	0.000513301	5	col12a1a
ppdpfa1	3.2271e-08	0.129764	0.183	0.044	0.000529697	5	ppdpfa
fam171a2a1	3.47196e-08	0.127343	0.169	0.039	0.000569887	5	fam171a2a
clic41	3.86292e-08	0.217585	0.451	0.179	0.00063406	5	clic4
phactr4b	4.20084e-08	0.109779	0.155	0.033	0.000689526	5	phactr4b
fzd7a1	4.48572e-08	0.130041	0.155	0.034	0.000736286	5	fzd7a
si:ch211-197h24.9	4.5153e-08	0.34925	0.62	0.33	0.000741141	5	si:ch211-197h24.9
kptn	5.11899e-08	0.152402	0.268	0.083	0.000840231	5	kptn
myh11a	6.00119e-08	0.121761	0.056	0.005	0.000985036	5	myh11a
cbx7a1	6.03016e-08	0.309209	0.296	0.097	0.00098979	5	cbx7a
tmsb2	6.30472e-08	0.117266	0.113	0.02	0.00103486	5	tmsb
zfr	6.58851e-08	0.163881	0.239	0.07	0.00108144	5	zfr
sdha1	6.93454e-08	0.253999	0.507	0.22	0.00113824	5	sdha
cadm41	8.04255e-08	0.151113	0.239	0.071	0.0013201	5	cadm4
capn2a2	8.07066e-08	0.250483	0.521	0.242	0.00132472	5	capn2a
eno1a	9.03189e-08	0.192309	0.197	0.052	0.00148249	5	eno1a
tuba8l31	1.03724e-07	0.117066	0.169	0.04	0.00170252	5	tuba8l3
capns1a1	1.07884e-07	0.279162	0.577	0.272	0.00177081	5	capns1a
glo11	1.13286e-07	0.202505	0.254	0.077	0.00185947	5	glo1
si:ch211-198c19.31	1.2621e-07	0.118178	0.113	0.02	0.00207161	5	si:ch211-198c19.3
csrp1a1	1.28377e-07	0.176092	0.254	0.078	0.00210719	5	csrp1a
si:dkey-239h2.31	1.55341e-07	0.200375	0.239	0.073	0.00254977	5	si:dkey-239h2.3
rap1b1	1.77321e-07	0.22219	0.352	0.133	0.00291055	5	rap1b
vcam1b1	1.80957e-07	0.119192	0.127	0.025	0.00297023	5	vcam1b
CABZ01064859.1	1.94685e-07	0.146402	0.268	0.087	0.00319555	5	CABZ01064859.1
greb1l	2.35716e-07	0.141105	0.211	0.061	0.00386904	5	greb1l
gpc41	2.44525e-07	0.262266	0.592	0.306	0.00401363	5	gpc4
cdon	3.29798e-07	0.145982	0.282	0.096	0.00541331	5	cdon
zgc:77849	4.45858e-07	0.261241	0.507	0.237	0.00731831	5	zgc:77849
jpt1b1	4.51459e-07	0.308861	0.394	0.166	0.00741024	5	jpt1b
tgfb1a	4.54098e-07	0.130644	0.197	0.056	0.00745356	5	tgfb1a
gclm	4.67384e-07	0.132847	0.197	0.056	0.00767164	5	gclm
si:dkey-222f8.31	4.81585e-07	0.212675	0.338	0.128	0.00790474	5	si:dkey-222f8.3
f102	4.93579e-07	0.205112	0.592	0.291	0.0081016	5	f10
bahcc1b	6.04386e-07	0.162494	0.296	0.107	0.0099204	5	bahcc1b
slain2	6.22828e-07	0.175044	0.282	0.101	0.0102231	5	slain2
icmt	7.52508e-07	0.145511	0.169	0.044	0.0123517	5	icmt
adh53	8.04597e-07	0.280147	0.69	0.38	0.0132067	5	adh5
vwde	8.1695e-07	0.245797	0.366	0.155	0.0134094	5	vwde
snrnp200	8.23079e-07	0.130608	0.197	0.057	0.01351	5	snrnp200
arrdc3b1	1.03651e-06	0.207859	0.225	0.072	0.0170133	5	arrdc3b
ckba	1.17503e-06	0.117039	0.099	0.018	0.019287	5	ckba
adh8b1	1.23748e-06	0.122376	0.211	0.064	0.0203121	5	adh8b
pdzrn3b	1.40625e-06	0.149079	0.155	0.04	0.0230822	5	pdzrn3b
si:ch211-212k18.71	1.63408e-06	0.302063	0.479	0.239	0.0268217	5	si:ch211-212k18.7
dchs1a1	1.72024e-06	0.130173	0.197	0.059	0.028236	5	dchs1a
pnisr	1.73549e-06	0.248272	0.338	0.139	0.0284864	5	pnisr
hmgn22	1.88619e-06	0.310704	0.789	0.457	0.0309599	5	hmgn2
pik3r2	2.13042e-06	0.21804	0.634	0.334	0.0349688	5	pik3r2
tmem176l.11	2.21042e-06	0.312048	0.817	0.512	0.0362819	5	tmem176l.1
GTPBP8	2.4451e-06	0.101899	0.155	0.041	0.0401338	5	GTPBP8
nfia1	2.99551e-06	0.173092	0.225	0.076	0.0491682	5	nfia
rnf213a1	3.04069e-06	0.285657	0.676	0.384	0.0499099	5	rnf213a
dhrs13l12	3.07555e-06	0.227727	0.451	0.223	0.0504821	5	dhrs13l1
vgll4b	3.07935e-06	0.169796	0.282	0.107	0.0505444	5	vgll4b
akap12b2	3.29557e-06	0.297259	0.887	0.58	0.0540935	5	akap12b
eif4bb1	3.48353e-06	0.174528	0.324	0.127	0.0571787	5	eif4bb
fblim11	3.59789e-06	0.24139	0.31	0.129	0.0590558	5	fblim1
ppp2r5d	3.67794e-06	0.17293	0.296	0.116	0.0603697	5	ppp2r5d
sumo2b3	3.78566e-06	0.235477	0.563	0.286	0.0621378	5	sumo2b
bnip3lb	4.35614e-06	0.170357	0.296	0.113	0.0715017	5	bnip3lb
cst31	4.84373e-06	0.29395	0.732	0.445	0.079505	5	cst3
hopx1	5.19315e-06	0.151757	0.169	0.049	0.0852404	5	hopx
rnf19a1	5.24776e-06	0.176877	0.465	0.21	0.0861368	5	rnf19a
CABZ01061495.1	5.39563e-06	0.128678	0.169	0.05	0.0885638	5	CABZ01061495.1
FRMD1	5.9033e-06	0.180434	0.282	0.11	0.0968968	5	FRMD1
tmem2581	6.12126e-06	0.190898	0.296	0.115	0.100474	5	tmem258
mhc1zba2	6.17981e-06	0.264979	1	0.753	0.101435	5	mhc1zba
stk17al	6.27084e-06	0.100679	0.099	0.02	0.10293	5	stk17al
fkbp71	6.79839e-06	0.115955	0.169	0.05	0.111589	5	fkbp7
lbr1	7.29329e-06	0.120571	0.169	0.049	0.119712	5	lbr
arpc42	8.01609e-06	0.177331	0.239	0.087	0.131576	5	arpc4
si:ch211-74f19.2	8.75405e-06	0.105044	0.141	0.038	0.143689	5	si:ch211-74f19.2
peli1b	9.31837e-06	0.160792	0.324	0.138	0.152952	5	peli1b
pabpn11	9.34242e-06	0.245551	0.704	0.411	0.153346	5	pabpn1
tgm2b	9.75388e-06	0.116177	0.155	0.044	0.1601	5	tgm2b
anp32a	9.76794e-06	0.233804	0.634	0.353	0.160331	5	anp32a
chm	9.95257e-06	0.123189	0.197	0.065	0.163361	5	chm
fgl2a1	9.97707e-06	0.160233	0.183	0.058	0.163764	5	fgl2a
mgst1.11	1.05899e-05	0.163507	0.254	0.097	0.173822	5	mgst1.1
tiam1a	1.17821e-05	0.125572	0.169	0.052	0.193391	5	tiam1a
rfxap	1.28167e-05	0.200284	0.239	0.089	0.210373	5	rfxap
echs11	1.28565e-05	0.195604	0.338	0.145	0.211027	5	echs1
itga92	1.3028e-05	0.241492	0.549	0.308	0.213842	5	itga9
kirrel1a1	1.34986e-05	0.113294	0.169	0.052	0.221567	5	kirrel1a
cpvl	1.35223e-05	0.154921	0.211	0.072	0.221955	5	cpvl
herc1	1.35388e-05	0.119575	0.225	0.08	0.222225	5	herc1
tmem30ab1	1.41325e-05	0.189582	0.366	0.166	0.23197	5	tmem30ab
scarb2a1	1.62047e-05	0.144998	0.31	0.13	0.265984	5	scarb2a
tpm32	1.62941e-05	0.208959	0.662	0.371	0.267451	5	tpm3
mob2a1	1.6812e-05	0.142817	0.338	0.148	0.275952	5	mob2a
bbip11	1.79083e-05	0.134978	0.239	0.088	0.293947	5	bbip1
spon1b2	1.83361e-05	0.152718	0.352	0.16	0.300969	5	spon1b
cwc25	1.88714e-05	0.147434	0.282	0.115	0.309754	5	cwc25
csnk1g2a	1.90477e-05	0.165402	0.211	0.075	0.312649	5	csnk1g2a
ppfibp1a1	1.9434e-05	0.181271	0.394	0.178	0.31899	5	ppfibp1a
adam10a	1.96078e-05	0.170948	0.38	0.168	0.321842	5	adam10a
tpt12	1.97697e-05	0.177847	1	0.964	0.324499	5	tpt1
macf1a	2.04845e-05	0.184394	0.268	0.108	0.336233	5	macf1a
lrrc171	2.0652e-05	0.108424	0.113	0.028	0.338982	5	lrrc17
ggh	2.2529e-05	0.116224	0.211	0.075	0.36979	5	ggh
adamts22	2.26935e-05	0.166387	0.451	0.223	0.372491	5	adamts2
lipf1	2.32803e-05	0.126939	0.268	0.107	0.382122	5	lipf
ranbp9	2.40179e-05	0.1215	0.296	0.121	0.394229	5	ranbp9
irf21	2.64834e-05	0.190944	0.38	0.187	0.434698	5	irf2
foxp1a	2.99645e-05	0.203228	0.408	0.198	0.491837	5	foxp1a
hist1h4l.101	3.00536e-05	0.189989	0.437	0.224	0.4933	5	hist1h4l.10
cxcl141	3.01236e-05	0.267312	0.69	0.417	0.494449	5	cxcl14
arhgdig1	3.03751e-05	0.123716	0.169	0.053	0.498578	5	arhgdig
timm17a	3.05396e-05	0.131747	0.282	0.113	0.501278	5	timm17a
anxa13	3.0596e-05	0.179715	0.408	0.195	0.502203	5	anxa13
rad21a1	3.0634e-05	0.193546	0.479	0.243	0.502827	5	rad21a
cygb12	3.12951e-05	0.235298	0.493	0.25	0.513677	5	cygb1
cish	3.1306e-05	0.138602	0.324	0.142	0.513857	5	cish
bcas21	3.19231e-05	0.184553	0.352	0.161	0.523985	5	bcas2
pkig1	3.27695e-05	0.131515	0.197	0.067	0.537878	5	pkig
si:dkey-73n10.11	3.3232e-05	0.186398	0.69	0.391	0.545469	5	si:dkey-73n10.1
reep3a1	3.36365e-05	0.113023	0.183	0.062	0.552109	5	reep3a
si:ch211-121a2.2	3.78228e-05	0.11058	0.225	0.084	0.620823	5	si:ch211-121a2.2
phf2	3.85823e-05	0.172256	0.31	0.141	0.63329	5	phf2
pdgfrl	3.90598e-05	0.138263	0.296	0.127	0.641128	5	pdgfrl
kdelr2b	3.94356e-05	0.154338	0.239	0.092	0.647296	5	kdelr2b
il15ra1	3.99378e-05	0.132041	0.282	0.118	0.655539	5	il15ra
zfp36l21	4.00716e-05	0.181425	0.183	0.062	0.657735	5	zfp36l2
gpx1a1	4.08129e-05	0.122914	0.197	0.068	0.669903	5	gpx1a
acox1	4.27191e-05	0.116268	0.239	0.093	0.701192	5	acox1
eppk11	4.33589e-05	0.226658	0.366	0.181	0.711692	5	eppk1
hhip	4.37861e-05	0.251751	0.113	0.029	0.718704	5	hhip
si:ch211-196l7.4	4.38642e-05	0.275579	0.718	0.45	0.719987	5	si:ch211-196l7.4
ap3m1	4.54257e-05	0.123383	0.268	0.111	0.745618	5	ap3m1
rnf13	4.58143e-05	0.213235	0.394	0.2	0.751996	5	rnf13
zcchc17	4.58511e-05	0.129036	0.254	0.103	0.7526	5	zcchc17
taf3	4.7652e-05	0.195491	0.268	0.111	0.782159	5	taf3
commd8	4.81235e-05	0.112248	0.239	0.093	0.789899	5	commd8
tnrc6b	4.83022e-05	0.144111	0.211	0.077	0.792832	5	tnrc6b
anxa11a1	4.83514e-05	0.151175	0.211	0.078	0.793641	5	anxa11a
sema4bb	4.84443e-05	0.10316	0.183	0.063	0.795165	5	sema4bb
slka1	4.96431e-05	0.15543	0.394	0.196	0.814841	5	slka
hspb13	5.00146e-05	0.285768	0.831	0.575	0.820939	5	hspb1
zp2.3	5.09178e-05	0.245277	0.056	0.009	0.835765	5	zp2.3
atl31	5.16246e-05	0.150469	0.239	0.094	0.847366	5	atl3
sept7b	5.3238e-05	0.145789	0.225	0.086	0.873849	5	sept7b
nktr1	5.54839e-05	0.188432	0.408	0.212	0.910713	5	nktr
ube2g1b	5.55331e-05	0.105496	0.268	0.106	0.91152	5	ube2g1b
sap181	5.79641e-05	0.156807	0.38	0.178	0.951423	5	sap18
cpn1.12	5.84681e-05	0.185836	0.296	0.129	0.959696	5	cpn1.1
hnrnpd	5.95759e-05	0.127013	0.366	0.167	0.977879	5	hnrnpd
zbtb201	5.9709e-05	0.180232	0.521	0.299	0.980063	5	zbtb20
lgals2a	8.38793e-05	0.115297	0.056	0.009	1	5	lgals2a
slc35c2	0.000134465	0.102267	0.099	0.025	1	5	slc35c2
si:ch211-146l10.7	0.00172862	0.226658	0.085	0.025	1	5	si:ch211-146l10.7
si:dkeyp-98a7.9	0.00184621	0.17578	0.085	0.025	1	5	si:dkeyp-98a7.9
zp31	0.000276972	0.238773	0.113	0.033	1	5	zp3
si:ch1073-263o8.2	0.00668698	0.149484	0.099	0.036	1	5	si:ch1073-263o8.2
meis1b	0.000128054	0.103919	0.127	0.038	1	5	meis1b
b3galt2	0.000174396	0.103695	0.127	0.039	1	5	b3galt2
si:ch73-71c20.5	0.00058279	0.105135	0.127	0.042	1	5	si:ch73-71c20.5
wdr821	0.000666708	0.103818	0.127	0.043	1	5	wdr82
fip1l1b	0.00430346	0.12669	0.113	0.044	1	5	fip1l1b
chp2	0.00499082	0.104037	0.113	0.044	1	5	chp2
abhd17c	0.000143139	0.123189	0.141	0.045	1	5	abhd17c
dus2	0.000163311	0.102648	0.141	0.045	1	5	dus2
zgc:1717501	0.00206264	0.177909	0.127	0.047	1	5	zgc:171750
sar1b	0.00266144	0.127134	0.127	0.049	1	5	sar1b
BX511034.2	0.000464994	0.128234	0.141	0.05	1	5	BX511034.2
cotl11	0.000639648	0.178364	0.141	0.05	1	5	cotl1
zfyve21	0.000702457	0.10844	0.141	0.051	1	5	zfyve21
dstyk	0.00485025	0.120136	0.127	0.052	1	5	dstyk
fn1b1	0.000285189	0.195787	0.155	0.054	1	5	fn1b
pdcd6ip	0.00171015	0.103444	0.141	0.054	1	5	pdcd6ip
mia3	0.00174063	0.11893	0.141	0.054	1	5	mia3
si:ch73-160p18.31	0.00213114	0.238886	0.141	0.054	1	5	si:ch73-160p18.3
mrpl58	7.86002e-05	0.108435	0.169	0.058	1	5	mrpl58
bcl2l13	9.84543e-05	0.106233	0.169	0.058	1	5	bcl2l13
aldh18a1	0.000678414	0.142609	0.155	0.058	1	5	aldh18a1
gkap1	0.000697555	0.115925	0.155	0.058	1	5	gkap1
ccnt2b	0.000886247	0.103507	0.155	0.059	1	5	ccnt2b
nutf2l1	0.000183406	0.176712	0.169	0.061	1	5	nutf2l
inpp5ka	0.00027209	0.103818	0.169	0.062	1	5	inpp5ka
psmg2	0.00166156	0.101581	0.155	0.062	1	5	psmg2
rhbdd1	0.000333819	0.109311	0.169	0.063	1	5	rhbdd1
prpf40a	0.00288075	0.138317	0.155	0.067	1	5	prpf40a
eif4e2rs1	0.000184411	0.148943	0.183	0.068	1	5	eif4e2rs1
ndufa7	0.00140128	0.108665	0.169	0.069	1	5	ndufa7
stmn1a1	0.00433996	0.260077	0.155	0.069	1	5	stmn1a
ufd1l	0.000311431	0.123337	0.183	0.07	1	5	ufd1l
ccng2	0.00175093	0.166034	0.169	0.071	1	5	ccng2
psd3l	0.000283789	0.173387	0.183	0.072	1	5	psd3l
ap2b1	0.000116432	0.116268	0.197	0.073	1	5	ap2b1
itga11	0.000498252	0.100847	0.183	0.073	1	5	itga1
p4ha2	9.62429e-05	0.1267	0.197	0.074	1	5	p4ha2
rnf24	0.00229889	0.101712	0.169	0.074	1	5	rnf24
ccdc47	0.000237689	0.120807	0.197	0.076	1	5	ccdc47
socs1a1	0.000882586	0.11424	0.183	0.076	1	5	socs1a
btbd10b	0.000978327	0.134851	0.183	0.077	1	5	btbd10b
BX649250.1	0.00113937	0.109091	0.183	0.078	1	5	BX649250.1
ddx271	0.00160994	0.125496	0.183	0.079	1	5	ddx27
ddx471	0.00162362	0.119425	0.183	0.079	1	5	ddx47
safb	0.00041616	0.133599	0.197	0.08	1	5	safb
med19a1	0.00177369	0.119425	0.183	0.08	1	5	med19a
col4a11	0.000455514	0.118178	0.197	0.081	1	5	col4a1
tmc6b	0.0059558	0.11893	0.169	0.081	1	5	tmc6b
tcf20	0.000135903	0.104793	0.211	0.083	1	5	tcf20
si:dkey-51e6.11	0.000151919	0.143069	0.211	0.084	1	5	si:dkey-51e6.1
mmp14b	0.0008332	0.109514	0.197	0.085	1	5	mmp14b
gpat4	0.000837935	0.104149	0.197	0.085	1	5	gpat4
atf7b	0.000244505	0.113142	0.211	0.086	1	5	atf7b
sh3bgrl31	0.00353091	0.133739	0.183	0.086	1	5	sh3bgrl3
ets21	0.0044478	0.118691	0.183	0.086	1	5	ets2
elovl1b1	6.68777e-05	0.160189	0.225	0.087	1	5	elovl1b
map3k5	0.00031566	0.109301	0.211	0.087	1	5	map3k5
si:dkey-71l4.4	7.8873e-05	0.107387	0.225	0.088	1	5	si:dkey-71l4.4
rgs12b1	8.65645e-05	0.107174	0.225	0.088	1	5	rgs12b
clk2a	0.00142621	0.109301	0.197	0.088	1	5	clk2a
ap1s1	0.000127603	0.100702	0.225	0.089	1	5	ap1s1
med30	0.000438704	0.101367	0.211	0.089	1	5	med30
tia1l1	0.0023991	0.125541	0.197	0.091	1	5	tia1l
zgc:1630801	0.00930416	0.104408	0.183	0.091	1	5	zgc:163080
serpinh1b1	0.000667799	0.251474	0.211	0.092	1	5	serpinh1b
ube2d1a	0.000741339	0.104627	0.211	0.092	1	5	ube2d1a
nr0b11	0.000219185	0.107847	0.225	0.093	1	5	nr0b1
naa20	0.00307989	0.123066	0.197	0.093	1	5	naa20
snx14	0.00373211	0.103992	0.197	0.095	1	5	snx14
zzz3	7.52185e-05	0.110982	0.239	0.096	1	5	zzz3
lama41	0.000248226	0.128407	0.225	0.096	1	5	lama4
tax1bp31	0.000319126	0.169307	0.225	0.096	1	5	tax1bp3
dap1	0.00505241	0.117163	0.197	0.096	1	5	dap
rnasekb	0.000332878	0.113939	0.225	0.097	1	5	rnasekb
ttc14	0.000372133	0.108875	0.225	0.097	1	5	ttc14
anxa3b1	0.000189466	0.105986	0.239	0.098	1	5	anxa3b
ino80e	0.000535518	0.101119	0.225	0.098	1	5	ino80e
pbxip1b1	0.000586399	0.118788	0.225	0.098	1	5	pbxip1b
smdt1b1	0.00254614	0.102182	0.211	0.098	1	5	smdt1b
rer11	0.00729959	0.101374	0.197	0.098	1	5	rer1
mrps9	0.000558028	0.108244	0.225	0.099	1	5	mrps9
gpatch11	0.000175447	0.107193	0.239	0.1	1	5	gpatch11
abi1a	0.00601299	0.107193	0.197	0.1	1	5	abi1a
sec63	0.00285627	0.102859	0.211	0.102	1	5	sec63
pbx1a1	0.0026588	0.114091	0.211	0.103	1	5	pbx1a
ccdc6a	0.00128102	0.11486	0.225	0.104	1	5	ccdc6a
stip11	0.00533718	0.100657	0.211	0.105	1	5	stip1
roraa	0.000477767	0.101119	0.239	0.106	1	5	roraa
calm3a.1	0.000549204	0.118775	0.239	0.106	1	5	calm3a.1
ppp6r3	0.00230409	0.115398	0.225	0.106	1	5	ppp6r3
stk24b	0.00445474	0.101328	0.211	0.106	1	5	stk24b
mob4	0.00530264	0.132545	0.211	0.106	1	5	mob4
copz11	0.00538841	0.120168	0.211	0.106	1	5	copz1
sccpdhb	0.000290223	0.13736	0.239	0.107	1	5	sccpdhb
siah1	0.000563916	0.102373	0.239	0.108	1	5	siah1
cope	0.00203666	0.130323	0.225	0.108	1	5	cope
hnrnpm1	0.00206424	0.13052	0.225	0.108	1	5	hnrnpm
rnaseh1	0.000309576	0.105496	0.254	0.109	1	5	rnaseh1
si:ch211-213a13.12	0.000898129	0.105298	0.239	0.109	1	5	si:ch211-213a13.1
znf330	0.00604536	0.101328	0.211	0.109	1	5	znf330
epb41l5	0.000728388	0.151731	0.239	0.11	1	5	epb41l5
plecb1	0.00300002	0.100587	0.225	0.112	1	5	plecb
ebna1bp21	0.00923242	0.12301	0.211	0.112	1	5	ebna1bp2
zc3h151	0.00049853	0.12384	0.254	0.113	1	5	zc3h15
mindy1	0.00880124	0.10348	0.211	0.113	1	5	mindy1
fbxl71	0.000421593	0.103273	0.254	0.114	1	5	fbxl7
clta1	0.00477217	0.111999	0.225	0.114	1	5	clta
exoc1	0.000416429	0.112586	0.254	0.115	1	5	exoc1
si:dkey-28b4.71	0.000166492	0.155807	0.268	0.116	1	5	si:dkey-28b4.7
srsf1b	0.00069734	0.133748	0.254	0.116	1	5	srsf1b
nfybb1	0.00116608	0.137558	0.239	0.116	1	5	nfybb
vamp8	0.00478288	0.101619	0.225	0.116	1	5	vamp8
srsf4	0.00730624	0.103374	0.225	0.116	1	5	srsf4
si:dkey-88p24.11	0.000217401	0.130209	0.268	0.12	1	5	si:dkey-88p24.11
snd11	0.00317168	0.108088	0.239	0.12	1	5	snd1
emc101	0.00747587	0.116816	0.225	0.12	1	5	emc10
si:ch73-380l3.41	6.34546e-05	0.139278	0.282	0.121	1	5	si:ch73-380l3.4
snx6	0.00421324	0.107526	0.239	0.121	1	5	snx6
pgrmc2	0.00438217	0.106948	0.239	0.121	1	5	pgrmc2
si:ch211-1a19.31	0.00532858	0.103551	0.239	0.121	1	5	si:ch211-1a19.3
timm23a1	0.000176808	0.118957	0.282	0.123	1	5	timm23a
lman2	0.000170405	0.138105	0.282	0.124	1	5	lman2
hagh	0.00123745	0.108258	0.254	0.124	1	5	hagh
fam49a	0.00127398	0.112749	0.254	0.124	1	5	fam49a
snrnp701	0.00422332	0.118957	0.239	0.124	1	5	snrnp70
cs1	0.000867051	0.111773	0.268	0.125	1	5	cs
adka	0.00352403	0.123066	0.239	0.126	1	5	adka
hipk2	0.0049444	0.100679	0.239	0.126	1	5	hipk2
cavin2a1	0.000131727	0.14419	0.282	0.127	1	5	cavin2a
fzd7b1	0.000141027	0.126748	0.282	0.127	1	5	fzd7b
luc7l31	0.0018348	0.121434	0.254	0.127	1	5	luc7l3
cast1	0.00822205	0.110767	0.239	0.127	1	5	cast
si:dkey-188i13.11	0.000906655	0.175977	0.268	0.129	1	5	si:dkey-188i13.11
rtn3	0.00300953	0.127953	0.254	0.129	1	5	rtn3
UTP14C1	0.00653103	0.136034	0.239	0.13	1	5	UTP14C
tardbp1	0.00171234	0.116463	0.268	0.132	1	5	tardbp
usf1l1	0.00391603	0.132296	0.254	0.132	1	5	usf1l
taf121	0.00454245	0.109454	0.254	0.132	1	5	taf12
dynll12	0.000446936	0.224924	0.282	0.133	1	5	dynll1
wdr431	0.000196515	0.149858	0.296	0.134	1	5	wdr43
si:ch1073-322p19.1	0.00364058	0.106233	0.254	0.134	1	5	si:ch1073-322p19.1
ciarta1	0.001949	0.155718	0.268	0.135	1	5	ciarta
ube2ia1	0.00369085	0.147759	0.254	0.135	1	5	ube2ia
frmd8	0.00995114	0.100067	0.239	0.135	1	5	frmd8
tardbpl	0.000496348	0.175415	0.282	0.136	1	5	tardbpl
plxnb2a	0.000501486	0.130382	0.282	0.137	1	5	plxnb2a
bcas3	0.000706247	0.112909	0.282	0.138	1	5	bcas3
trnau1apb1	0.00119671	0.125871	0.282	0.138	1	5	trnau1apb
zgc:92664	0.00221389	0.104408	0.268	0.138	1	5	zgc:92664
cebpg1	0.00136157	0.110578	0.282	0.139	1	5	cebpg
lpp	0.00602719	0.103194	0.254	0.139	1	5	lpp
srgap21	0.000976408	0.108674	0.282	0.14	1	5	srgap2
zgc:1946591	0.00117344	0.121035	0.282	0.14	1	5	zgc:194659
smg7	0.00147544	0.147818	0.268	0.14	1	5	smg7
ghra	0.000873913	0.129979	0.282	0.141	1	5	ghra
anapc16	0.00144975	0.128323	0.282	0.141	1	5	anapc16
zgc:153215	0.00331776	0.117034	0.268	0.141	1	5	zgc:153215
rab7a	0.00957627	0.116124	0.254	0.141	1	5	rab7a
nrg2a1	0.00337509	0.103055	0.268	0.142	1	5	nrg2a
pfdn42	0.00361433	0.134003	0.268	0.143	1	5	pfdn4
ubap2l1	0.000132277	0.173343	0.31	0.144	1	5	ubap2l
hikeshi1	0.000186407	0.133029	0.31	0.144	1	5	hikeshi
sft2d1	0.00244645	0.132397	0.268	0.144	1	5	sft2d1
sltm1	0.000708903	0.129881	0.296	0.145	1	5	sltm
baz2ba	0.000159907	0.133544	0.31	0.146	1	5	baz2ba
HACD4	0.00482943	0.103055	0.268	0.146	1	5	HACD4
fam133b	0.00679468	0.109437	0.268	0.146	1	5	fam133b
ubtf	0.000725324	0.179501	0.296	0.147	1	5	ubtf
srsf6b1	0.000106119	0.152045	0.324	0.148	1	5	srsf6b
aldh2.2	9.70173e-05	0.165849	0.324	0.149	1	5	aldh2.2
gsta.1	0.000710702	0.122362	0.296	0.149	1	5	gsta.1
rpn11	0.00122676	0.144192	0.296	0.149	1	5	rpn1
rbbp92	0.00155428	0.112999	0.296	0.149	1	5	rbbp9
sqstm11	0.00487151	0.108346	0.282	0.149	1	5	sqstm1
sik2b	0.00181016	0.132545	0.282	0.15	1	5	sik2b
neo1a1	0.000100628	0.214513	0.31	0.151	1	5	neo1a
pdap1b	0.000194993	0.150589	0.31	0.151	1	5	pdap1b
si:dkey-112e7.22	0.00196907	0.10421	0.296	0.151	1	5	si:dkey-112e7.2
ost41	0.00375408	0.122586	0.282	0.151	1	5	ost4
prkar2aa2	0.0095546	0.121236	0.268	0.151	1	5	prkar2aa
gstp12	0.00120534	0.170306	0.296	0.152	1	5	gstp1
smim19	0.00292751	0.112033	0.282	0.152	1	5	smim19
cnn3a1	0.000587799	0.161368	0.31	0.153	1	5	cnn3a
megf8	0.00393026	0.124197	0.282	0.156	1	5	megf8
eno32	0.00349697	0.137304	0.296	0.157	1	5	eno3
plk31	0.0010182	0.161803	0.31	0.158	1	5	plk3
fubp11	0.000845457	0.171915	0.31	0.16	1	5	fubp1
zmiz1a	0.00291435	0.10391	0.296	0.161	1	5	zmiz1a
ostc1	0.00847228	0.124307	0.282	0.161	1	5	ostc
srsf111	0.000303578	0.179435	0.324	0.163	1	5	srsf11
arglu1a	0.00737822	0.12526	0.282	0.164	1	5	arglu1a
brms1	0.00916988	0.104551	0.282	0.164	1	5	brms1
raver2	0.000152508	0.157249	0.338	0.167	1	5	raver2
rasgef1ba	0.000159861	0.154645	0.338	0.167	1	5	rasgef1ba
spcs3	0.00242982	0.136507	0.31	0.167	1	5	spcs3
pcf111	0.001814	0.114284	0.324	0.168	1	5	pcf11
sec61b1	0.00800787	0.106781	0.296	0.168	1	5	sec61b
pnn	0.00348982	0.128646	0.31	0.17	1	5	pnn
tbc1d10aa	0.00275896	0.109265	0.31	0.171	1	5	tbc1d10aa
si:ch211-15b10.62	0.000366254	0.159463	0.352	0.174	1	5	si:ch211-15b10.6
rras1	0.00280654	0.112586	0.324	0.175	1	5	rras
pi4kb	0.000996655	0.17414	0.324	0.179	1	5	pi4kb
u2af11	0.00217095	0.156367	0.324	0.18	1	5	u2af1
arid1b	0.00601139	0.110022	0.31	0.18	1	5	arid1b
u2surp1	0.000373	0.235679	0.338	0.182	1	5	u2surp
sri1	0.00226011	0.144695	0.338	0.183	1	5	sri
srprb1	0.00738193	0.100012	0.324	0.183	1	5	srprb
cav22	0.000316831	0.115981	0.366	0.184	1	5	cav2
CT027638.11	0.000488649	0.184183	0.352	0.184	1	5	CT027638.1
gstk1	0.00139337	0.123724	0.338	0.184	1	5	gstk1
pbx41	8.1184e-05	0.193973	0.38	0.186	1	5	pbx4
sntb21	0.000395196	0.176267	0.352	0.189	1	5	sntb2
arf2a1	0.00702808	0.118697	0.324	0.189	1	5	arf2a
rbm5	0.000370706	0.122383	0.366	0.19	1	5	rbm5
hnrnpa0a1	0.00449695	0.102541	0.338	0.19	1	5	hnrnpa0a
arhgap35a	0.000528318	0.175505	0.352	0.193	1	5	arhgap35a
rpl261	0.00949334	0.113604	0.324	0.193	1	5	rpl26
hmgb3a1	0.00150179	0.128123	0.352	0.194	1	5	hmgb3a
nupr1a1	0.00339262	0.153216	0.352	0.197	1	5	nupr1a
rab11a	0.0063047	0.1298	0.338	0.198	1	5	rab11a
ap1s21	0.000104264	0.14575	0.408	0.2	1	5	ap1s2
hsd11b21	0.000431981	0.101495	0.394	0.202	1	5	hsd11b2
prdx41	0.00130589	0.161743	0.366	0.202	1	5	prdx4
si:ch211-191j22.3	0.00218225	0.130316	0.366	0.202	1	5	si:ch211-191j22.3
CU929037.2	6.31013e-05	0.194578	0.394	0.205	1	5	CU929037.2
si:ch211-108d22.2	0.000422616	0.109437	0.394	0.207	1	5	si:ch211-108d22.2
flna1	0.00748153	0.144778	0.338	0.207	1	5	flna
polr2l1	0.0020663	0.116579	0.38	0.208	1	5	polr2l
tspan3a1	0.00497107	0.110545	0.366	0.21	1	5	tspan3a
pik3r1	0.00115587	0.127023	0.38	0.212	1	5	pik3r1
rab5ab	0.00284585	0.12214	0.366	0.212	1	5	rab5ab
ip6k2b	0.000626927	0.115805	0.408	0.215	1	5	ip6k2b
ISCU (1 of many)	0.000473659	0.152318	0.408	0.216	1	5	ISCU (1 of many)
per31	0.000114168	0.168912	0.423	0.218	1	5	per3
ip6k2a1	0.000679546	0.189085	0.38	0.218	1	5	ip6k2a
degs1	0.00110293	0.148816	0.38	0.218	1	5	degs1
cldn5a2	6.40309e-05	0.221798	0.423	0.22	1	5	cldn5a
si:ch211-281l24.31	0.000405366	0.171441	0.408	0.22	1	5	si:ch211-281l24.3
si:ch73-138n13.1	0.00899903	0.126469	0.352	0.224	1	5	si:ch73-138n13.1
atp2b42	7.71998e-05	0.206843	0.437	0.225	1	5	atp2b4
rab1ab	0.00326522	0.106478	0.394	0.225	1	5	rab1ab
serinc21	0.00117825	0.162056	0.408	0.227	1	5	serinc2
stau2	0.00378186	0.159792	0.38	0.228	1	5	stau2
amotl2a2	0.00131764	0.165585	0.423	0.233	1	5	amotl2a
mtdha	0.00077576	0.113145	0.437	0.235	1	5	mtdha
rbbp61	0.00211523	0.127405	0.408	0.235	1	5	rbbp6
lrrc11	0.00496115	0.1346	0.38	0.236	1	5	lrrc1
pank2	0.00547201	0.122087	0.38	0.236	1	5	pank2
snx17	0.00972385	0.101174	0.38	0.24	1	5	snx17
map1lc3b1	0.0090982	0.104434	0.38	0.241	1	5	map1lc3b
lrp1aa2	0.00185253	0.125928	0.423	0.242	1	5	lrp1aa
caprin1b1	0.00432145	0.148395	0.408	0.244	1	5	caprin1b
pfdn51	0.000560031	0.174036	0.437	0.245	1	5	pfdn5
creb3l2	0.00180543	0.116592	0.423	0.248	1	5	creb3l2
fam32a1	0.00151009	0.130744	0.437	0.249	1	5	fam32a
ppp1r1b2	0.00664534	0.116794	0.394	0.25	1	5	ppp1r1b
eif3s6ip2	0.00209837	0.119537	0.437	0.251	1	5	eif3s6ip
znf706	0.00342813	0.130129	0.423	0.253	1	5	znf706
jam3b	0.000103895	0.230373	0.451	0.255	1	5	jam3b
tob1a2	0.00682801	0.14204	0.423	0.256	1	5	tob1a
si:ch211-214j24.101	0.00284072	0.128197	0.437	0.257	1	5	si:ch211-214j24.10
per1b	0.000105818	0.134851	0.507	0.26	1	5	per1b
sall1a1	0.000261407	0.220028	0.451	0.262	1	5	sall1a
gna12a	0.00108864	0.113955	0.451	0.262	1	5	gna12a
kctd5a	0.00532093	0.113473	0.423	0.262	1	5	kctd5a
elocb	0.00271322	0.152371	0.437	0.263	1	5	elocb
anxa11b1	0.000996463	0.144602	0.465	0.264	1	5	anxa11b
igf2b1	0.00428086	0.150933	0.408	0.266	1	5	igf2b
tnrc6a1	0.00189966	0.1491	0.451	0.267	1	5	tnrc6a
laptm4a	0.00295073	0.132712	0.437	0.268	1	5	laptm4a
sf3b6	0.0083908	0.108564	0.437	0.271	1	5	sf3b6
ccnl1a1	0.00398297	0.141325	0.437	0.272	1	5	ccnl1a
srrm11	0.00284082	0.120536	0.465	0.276	1	5	srrm1
si:ch211-204c21.1.11	0.00318787	0.144885	0.437	0.278	1	5	si:ch211-204c21.1.1
zgc:1527911	0.00413141	0.103264	0.465	0.284	1	5	zgc:152791
rhoq1	0.000132105	0.193701	0.493	0.286	1	5	rhoq
hmgb2a2	0.00545748	0.159055	0.451	0.287	1	5	hmgb2a
gabarapa1	0.000197557	0.176182	0.521	0.291	1	5	gabarapa
si:ch211-250c4.42	0.00120297	0.118737	0.493	0.294	1	5	si:ch211-250c4.4
wbp2nl	0.0074926	0.138302	0.451	0.294	1	5	wbp2nl
vdac31	0.00430979	0.104588	0.493	0.298	1	5	vdac3
mef2d	0.00183157	0.164527	0.465	0.303	1	5	mef2d
nop581	0.000316384	0.159756	0.535	0.304	1	5	nop58
hist2h2l3	0.00937844	0.100595	0.479	0.307	1	5	hist2h2l
si:ch211-199g17.21	0.000117571	0.162093	0.563	0.308	1	5	si:ch211-199g17.2
nucks1a1	0.0042033	0.122356	0.493	0.308	1	5	nucks1a
si:dkey-188i13.101	0.000272673	0.184495	0.535	0.31	1	5	si:dkey-188i13.10
foxl2a1	0.000382276	0.18073	0.507	0.31	1	5	foxl2a
si:ch73-335l21.42	0.000659939	0.169062	0.521	0.31	1	5	si:ch73-335l21.4
tnrc6c11	0.00538479	0.133132	0.507	0.319	1	5	tnrc6c1
ywhabb1	0.00161183	0.146616	0.521	0.32	1	5	ywhabb
sept101	0.000131208	0.174473	0.577	0.321	1	5	2020-09-10
egfra3	0.00707071	0.127108	0.493	0.328	1	5	egfra
ccnd2a1	0.000217073	0.159426	0.577	0.33	1	5	ccnd2a
ndrg2	0.000583658	0.130108	0.563	0.335	1	5	ndrg2
anxa42	0.00160044	0.139598	0.563	0.342	1	5	anxa4
tomm51	0.00450411	0.112532	0.563	0.353	1	5	tomm5
cox4i21	0.00112237	0.129708	0.606	0.362	1	5	cox4i2
ankrd11	0.00033931	0.2051	0.606	0.371	1	5	ankrd11
tln11	0.00264496	0.140184	0.577	0.374	1	5	tln1
add3a1	0.00109007	0.160142	0.606	0.376	1	5	add3a
s100v22	0.000268645	0.171454	0.634	0.379	1	5	s100v2
ppp1cb1	0.000307484	0.16491	0.648	0.379	1	5	ppp1cb
ctnnb1	0.00333953	0.118427	0.62	0.389	1	5	ctnnb1
zgc:1584631	7.43789e-05	0.233521	0.662	0.394	1	5	zgc:158463
tcf122	0.000819408	0.174944	0.634	0.399	1	5	tcf12
ube2e31	0.000315589	0.202769	0.648	0.404	1	5	ube2e3
vamp3	0.00120312	0.155965	0.648	0.41	1	5	vamp3
serpinb11	0.00326013	0.119101	0.662	0.426	1	5	serpinb1
qkia1	0.000380047	0.205691	0.69	0.427	1	5	qkia
eif2s31	0.00570292	0.112184	0.662	0.428	1	5	eif2s3
cox7b2	0.00891042	0.118433	0.662	0.436	1	5	cox7b
svild2	0.000256896	0.237862	0.662	0.439	1	5	svild
h1fx2	0.00103494	0.272121	0.662	0.442	1	5	h1fx
dedd1	0.000248885	0.20869	0.704	0.444	1	5	dedd1
ccng12	0.00751712	0.131562	0.69	0.459	1	5	ccng1
rsrp12	0.000346148	0.191408	0.746	0.483	1	5	rsrp1
f3b2	0.001317	0.149804	0.718	0.496	1	5	f3b
ywhaba1	0.00822898	0.138177	0.704	0.498	1	5	ywhaba
mgst3b1	0.00140823	0.131052	0.789	0.502	1	5	mgst3b
pgrmc12	8.25313e-05	0.244484	0.746	0.505	1	5	pgrmc1
eif4a1b	0.00166636	0.165928	0.761	0.509	1	5	eif4a1b
jund1	0.00785118	0.119489	0.746	0.509	1	5	jund
mmp21	0.00129617	0.123373	0.831	0.524	1	5	mmp2
aldh1a22	0.000325365	0.23483	0.789	0.531	1	5	aldh1a2
cebpd1	0.00343438	0.157903	0.746	0.533	1	5	cebpd
hsp70l2	0.00157534	0.316978	0.69	0.55	1	5	hsp70l
ubb2	0.00081552	0.147929	0.789	0.563	1	5	ubb
selenow11	0.00203523	0.149531	0.859	0.575	1	5	selenow1
sdc42	0.00437927	0.181273	0.761	0.575	1	5	sdc4
dnajb1b2	0.000329579	0.257925	0.831	0.621	1	5	dnajb1b
romo11	0.00115628	0.191919	0.887	0.656	1	5	romo1
aldh9a1a.11	0.00471474	0.164624	0.859	0.659	1	5	aldh9a1a.1
si:dkey-7j14.62	0.00423729	0.18169	0.944	0.725	1	5	si:dkey-7j14.6
marcksl1a2	0.000288068	0.230254	0.958	0.745	1	5	marcksl1a
rpl62	0.0009859	0.219438	0.873	0.746	1	5	rpl6
rpl42	0.000733676	0.23458	0.887	0.757	1	5	rpl4
btg11	0.000608934	0.230627	0.915	0.776	1	5	btg1
ppiaa2	0.00352522	0.192983	0.915	0.789	1	5	ppiaa
cirbpb1	0.00414097	0.172827	0.873	0.797	1	5	cirbpb
junba2	0.00279525	0.205386	0.93	0.829	1	5	junba
rplp22	0.00542348	0.160409	0.986	0.937	1	5	rplp2
rps181	0.00707953	0.115657	0.986	0.982	1	5	rps18
rpl222	0.00188441	0.13134	1	0.985	1	5	rpl22
rps27	0.000201204	0.152198	1	0.999	1	5	rps2
actb21	0.00136861	0.106307	1	0.999	1	5	actb2
