# Supplementary material for: Single-cell transcriptome reveals insights into the development and function of the zebrafish ovary
Source: eLife. 2022 May 19;11:e76014. doi: 10.7554/eLife.76014 (PMC9191896; doi:10.7554/eLife.76014)
Supplement: Supplementary file 4. [file elife-76014-supp4.xlsx]

## Sheet: All Pre-follicle Cells
	p_val	avg_logFC	pct.1	pct.2	p_val_adj	cluster	gene
slc25a5	3.1345e-51	0.347849	1	0.997	4.68858e-47	1_red	slc25a5
fbln5	5.76599e-50	0.615193	0.462	0.117	8.62476e-46	1_red	fbln5
appa	1.83084e-48	0.484396	0.972	0.776	2.73856e-44	1_red	appa
glulb	6.51323e-47	0.511282	1	0.852	9.74249e-43	1_red	glulb
uck2a	1.78862e-45	0.559379	0.758	0.356	2.67542e-41	1_red	uck2a
pnp4a	4.63723e-45	0.658189	0.921	0.593	6.93637e-41	1_red	pnp4a
ecm1b	8.72447e-40	0.465207	0.997	0.832	1.30501e-35	1_red	ecm1b
colec11	1.5283e-39	0.509653	0.679	0.292	2.28603e-35	1_red	colec11
inhbaa	4.75463e-36	0.520264	0.707	0.333	7.11198e-32	1_red	inhbaa
notch3	1.35608e-30	0.372242	1	0.794	2.02842e-26	1_red	notch3
atp5mc3b	2.84044e-30	0.346683	0.961	0.87	4.24874e-26	1_red	atp5mc3b
foxo1a	1.74067e-29	0.369804	0.442	0.161	2.6037e-25	1_red	foxo1a
dap1b	1.85205e-29	0.387563	0.997	0.869	2.7703e-25	1_red	dap1b
COLEC10	3.22994e-29	0.425374	0.625	0.306	4.83135e-25	1_red	COLEC10
arrdc3a	4.88519e-29	0.448458	0.707	0.373	7.30727e-25	1_red	arrdc3a
rgcc	2.1663e-27	0.505335	0.38	0.133	3.24035e-23	1_red	rgcc
hpgd	5.8531e-27	0.377777	0.335	0.107	8.75507e-23	1_red	hpgd
gmds	2.28265e-26	0.429525	0.161	0.024	3.41439e-22	1_red	gmds
mt-cyb	2.49914e-26	0.19308	0.997	0.996	3.73821e-22	1_red	mt-cyb
eya2	1.55713e-25	0.254933	0.487	0.206	2.32915e-21	1_red	eya2
hsd17b1	3.53331e-25	0.361114	0.91	0.653	5.28513e-21	1_red	hsd17b1
rbp5	5.43211e-24	0.381282	0.485	0.218	8.12535e-20	1_red	rbp5
nrxn2b	6.44709e-24	0.191316	0.293	0.091	9.64356e-20	1_red	nrxn2b
rasd1	4.19907e-23	0.430961	0.279	0.085	6.28097e-19	1_red	rasd1
ptprfb	4.7645e-23	0.346309	0.752	0.437	7.12674e-19	1_red	ptprfb
atp5fa1	1.39511e-22	0.367275	0.842	0.599	2.0868e-18	1_red	atp5fa1
cmasa	1.68659e-22	0.334469	0.29	0.096	2.5228e-18	1_red	cmasa
slc7a3a	6.66151e-22	0.36702	0.642	0.356	9.96429e-18	1_red	slc7a3a
mt-co2	7.8552e-22	0.134746	1	0.999	1.17498e-17	1_red	mt-co2
foxp4	2.07517e-21	0.347675	0.597	0.337	3.10405e-17	1_red	foxp4
hprt1	2.29834e-21	0.290023	0.541	0.252	3.43785e-17	1_red	hprt1
cldn11a	2.46049e-21	0.30108	0.994	0.956	3.68041e-17	1_red	cldn11a
atp5f1b	2.54747e-21	0.360876	0.817	0.597	3.81051e-17	1_red	atp5f1b
nrarpa	2.56839e-21	0.326138	0.839	0.585	3.8418e-17	1_red	nrarpa
mt-atp6	3.31822e-21	0.237559	1	0.976	4.9634e-17	1_red	mt-atp6
timp2a	6.17392e-21	0.386946	0.437	0.209	9.23495e-17	1_red	timp2a
nupr1b	1.28714e-20	0.66163	0.583	0.355	1.9253e-16	1_red	nupr1b
angptl4	1.71347e-20	0.436957	0.637	0.386	2.56301e-16	1_red	angptl4
dag1	1.94539e-20	0.288251	0.893	0.73	2.90991e-16	1_red	dag1
sort1a	1.07845e-19	0.269211	0.501	0.26	1.61314e-15	1_red	sort1a
sdk1a	1.19062e-19	0.20754	0.327	0.128	1.78093e-15	1_red	sdk1a
si:ch73-217n20.1	2.22537e-19	0.232351	0.417	0.189	3.32871e-15	1_red	si:ch73-217n20.1
cad	1.72709e-18	0.301455	0.823	0.593	2.58338e-14	1_red	cad
rpl5a	3.75107e-18	0.280947	0.856	0.719	5.61085e-14	1_red	rpl5a
cx34.5	4.88332e-18	0.318961	0.197	0.056	7.30446e-14	1_red	cx34.5
greb1	1.96335e-17	0.294005	0.544	0.29	2.93678e-13	1_red	greb1
SERP1	2.48624e-17	0.228599	1	0.975	3.71891e-13	1_red	SERP1
gmps	2.50367e-17	0.272353	0.915	0.665	3.74499e-13	1_red	gmps
her2	2.59925e-17	0.384492	0.606	0.354	3.88796e-13	1_red	her2
rplp1	2.8056e-17	0.158135	1	0.998	4.19662e-13	1_red	rplp1
klhl41b	4.64503e-17	0.104199	0.135	0.028	6.94803e-13	1_red	klhl41b
fscn1a	5.21419e-17	0.274138	0.468	0.228	7.79939e-13	1_red	fscn1a
col4a5	7.98248e-17	0.264349	0.89	0.692	1.19402e-12	1_red	col4a5
cmah	9.01858e-17	0.118127	0.166	0.042	1.349e-12	1_red	cmah
si:dkey-225k4.1	1.01731e-16	0.261303	0.375	0.173	1.52169e-12	1_red	si:dkey-225k4.1
pik3ip1	1.36898e-16	0.274975	0.679	0.415	2.04772e-12	1_red	pik3ip1
slc7a11	1.42865e-16	0.20607	0.411	0.199	2.13697e-12	1_red	slc7a11
slc8a4b	1.97759e-16	0.207208	0.515	0.279	2.95808e-12	1_red	slc8a4b
atp5f1c	4.82714e-16	0.268348	0.665	0.409	7.22043e-12	1_red	atp5f1c
mt-nd2	5.30196e-16	0.268379	0.868	0.735	7.93067e-12	1_red	mt-nd2
kidins220a	5.47738e-16	0.227539	0.569	0.326	8.19306e-12	1_red	kidins220a
slc38a5b	5.55198e-16	0.315274	0.614	0.383	8.30465e-12	1_red	slc38a5b
mt-co1	6.17929e-16	0.132683	1	1	9.24298e-12	1_red	mt-co1
oaz1b	1.13301e-15	0.25211	0.901	0.792	1.69476e-11	1_red	oaz1b
cox6c	1.31533e-15	0.305977	0.558	0.328	1.96748e-11	1_red	cox6c
rpl8	1.9417e-15	0.150684	1	0.997	2.90439e-11	1_red	rpl8
mt-co3	1.05306e-14	0.141535	1	1	1.57516e-10	1_red	mt-co3
prps1a	2.39762e-14	0.237439	0.476	0.252	3.58637e-10	1_red	prps1a
cdh1	2.69966e-14	0.239452	0.915	0.743	4.03815e-10	1_red	cdh1
cox7a1	2.9574e-14	0.251745	0.287	0.125	4.42368e-10	1_red	cox7a1
p4ha1b	4.29738e-14	0.237291	0.248	0.096	6.42803e-10	1_red	p4ha1b
eef2b	5.24657e-14	0.23094	0.879	0.803	7.84782e-10	1_red	eef2b
cox7b	5.55132e-14	0.261068	0.493	0.275	8.30366e-10	1_red	cox7b
oaz1a	8.03258e-14	0.230488	0.983	0.914	1.20151e-09	1_red	oaz1a
pdia2	1.3343e-13	0.132027	0.07	0.008	1.99585e-09	1_red	pdia2
atp5pd	1.45116e-13	0.273213	0.651	0.439	2.17064e-09	1_red	atp5pd
ccdc187	1.55686e-13	0.244727	0.634	0.399	2.32875e-09	1_red	ccdc187
folr	1.63074e-13	0.139085	0.093	0.017	2.43926e-09	1_red	folr
atp5pf	1.78231e-13	0.255142	0.617	0.396	2.66597e-09	1_red	atp5pf
sulf2b	1.85101e-13	0.295502	0.456	0.263	2.76874e-09	1_red	sulf2b
leo1	1.88628e-13	0.163835	0.211	0.076	2.82149e-09	1_red	leo1
sestd1	4.6858e-13	0.205041	0.282	0.123	7.00902e-09	1_red	sestd1
atp1a1a.1	4.88314e-13	0.233229	0.887	0.775	7.3042e-09	1_red	atp1a1a.1
mt-nd4	6.35779e-13	0.192565	0.935	0.878	9.50998e-09	1_red	mt-nd4
slit2	6.91537e-13	0.231402	0.637	0.424	1.0344e-08	1_red	slit2
rps12	7.94384e-13	0.132636	1	0.999	1.18824e-08	1_red	rps12
adarb1a	8.42407e-13	0.136578	0.183	0.064	1.26007e-08	1_red	adarb1a
rdh8a	9.32244e-13	0.120392	0.177	0.06	1.39445e-08	1_red	rdh8a
COX5B	1.48777e-12	0.27839	0.662	0.446	2.22541e-08	1_red	COX5B
atp5f1d	1.63367e-12	0.217499	0.589	0.365	2.44365e-08	1_red	atp5f1d
phlda2	1.92596e-12	0.179982	0.913	0.796	2.88085e-08	1_red	phlda2
myclb	2.03214e-12	0.289735	0.521	0.319	3.03968e-08	1_red	myclb
bccip	2.8724e-12	0.203123	0.397	0.206	4.29654e-08	1_red	bccip
si:ch73-193i22.1	2.99424e-12	0.120034	0.2	0.075	4.47878e-08	1_red	si:ch73-193i22.1
cox7c	3.67207e-12	0.246652	0.58	0.362	5.49268e-08	1_red	cox7c
pnp5a	3.83175e-12	0.229355	0.662	0.432	5.73153e-08	1_red	pnp5a
gmpr2	3.86994e-12	0.23238	0.496	0.285	5.78866e-08	1_red	gmpr2
sos1	4.33791e-12	0.153423	0.389	0.208	6.48864e-08	1_red	sos1
sash1a	4.82256e-12	0.206151	0.321	0.155	7.21359e-08	1_red	sash1a
serbp1a	4.87901e-12	0.201286	0.918	0.826	7.29802e-08	1_red	serbp1a
zgc:174863	4.90281e-12	0.20316	0.941	0.799	7.33362e-08	1_red	zgc:174863
tnika	5.4345e-12	0.191197	0.324	0.157	8.12892e-08	1_red	tnika
impdh1b	6.66211e-12	0.211182	0.476	0.265	9.96519e-08	1_red	impdh1b
notch1b	6.72993e-12	0.203666	0.456	0.278	1.00666e-07	1_red	notch1b
ppl	7.32446e-12	0.204211	0.552	0.343	1.09559e-07	1_red	ppl
mt-nd1	7.40764e-12	0.229257	0.868	0.768	1.10803e-07	1_red	mt-nd1
glula	7.74641e-12	0.200639	0.242	0.103	1.15871e-07	1_red	glula
rpl10	8.09576e-12	0.128444	1	0.998	1.21096e-07	1_red	rpl10
slc1a3a	8.32207e-12	0.120556	0.234	0.098	1.24481e-07	1_red	slc1a3a
her4.2.1	8.70093e-12	0.288885	0.254	0.114	1.30149e-07	1_red	her4.2.1
rps3a	1.06684e-11	0.133977	1	0.998	1.59578e-07	1_red	rps3a
mycb	1.37719e-11	0.167047	0.93	0.785	2.06001e-07	1_red	mycb
pdgfra	1.59944e-11	0.215845	0.938	0.753	2.39244e-07	1_red	pdgfra
rps3	2.4675e-11	0.157706	0.997	0.981	3.69088e-07	1_red	rps3
uqcrc1	2.67284e-11	0.187598	0.42	0.229	3.99804e-07	1_red	uqcrc1
cox7a2a	2.76473e-11	0.192114	0.301	0.146	4.13548e-07	1_red	cox7a2a
gapdhs	2.96763e-11	0.199703	0.89	0.741	4.43898e-07	1_red	gapdhs
AL954696.1	2.99922e-11	0.167038	0.169	0.06	4.48624e-07	1_red	AL954696.1
cyp2x12.1	3.15414e-11	0.154363	0.324	0.165	4.71797e-07	1_red	cyp2x12.1
slc35f2	3.67056e-11	0.197841	0.656	0.416	5.49042e-07	1_red	slc35f2
mef2aa	4.14241e-11	0.177428	0.487	0.3	6.19621e-07	1_red	mef2aa
ndufs8a	4.14758e-11	0.160187	0.296	0.14	6.20396e-07	1_red	ndufs8a
slc11a2	4.84323e-11	0.120137	0.135	0.042	7.24451e-07	1_red	slc11a2
ndufv2	5.52961e-11	0.13938	0.186	0.071	8.2712e-07	1_red	ndufv2
frmd6	5.75079e-11	0.151724	0.245	0.113	8.60203e-07	1_red	frmd6
PLEKHH3	6.80529e-11	0.166362	0.383	0.214	1.01794e-06	1_red	PLEKHH3
slc38a4	7.73793e-11	0.19882	0.521	0.326	1.15744e-06	1_red	slc38a4
hmgb3b	8.72871e-11	0.178362	0.265	0.124	1.30564e-06	1_red	hmgb3b
selenop	9.13432e-11	0.188964	0.972	0.882	1.36631e-06	1_red	selenop
si:ch211-240l19.5	9.28357e-11	0.273738	0.428	0.26	1.38864e-06	1_red	si:ch211-240l19.5
errfi1a	9.35909e-11	0.172123	0.459	0.273	1.39993e-06	1_red	errfi1a
mibp2	9.50949e-11	0.267595	0.538	0.358	1.42243e-06	1_red	mibp2
gstt1b	1.0083e-10	0.218505	0.885	0.776	1.50822e-06	1_red	gstt1b
abce1	1.03288e-10	0.112625	0.121	0.035	1.54498e-06	1_red	abce1
uqcr10	1.13081e-10	0.224631	0.256	0.118	1.69146e-06	1_red	uqcr10
plekhg4	1.38271e-10	0.215759	0.625	0.399	2.06826e-06	1_red	plekhg4
ndufb10	1.40557e-10	0.189203	0.366	0.202	2.10245e-06	1_red	ndufb10
gtpbp4	1.40912e-10	0.210884	0.524	0.348	2.10777e-06	1_red	gtpbp4
her4.3	1.43767e-10	0.155745	0.121	0.036	2.15047e-06	1_red	her4.3
si:zfos-464b6.2	1.52879e-10	0.190991	0.355	0.188	2.28676e-06	1_red	si:zfos-464b6.2
cldn7a	1.56985e-10	0.306431	0.628	0.443	2.34819e-06	1_red	cldn7a
eif4ebp3	1.57531e-10	0.193335	0.411	0.232	2.35635e-06	1_red	eif4ebp3
srpra	1.90563e-10	0.193803	0.845	0.648	2.85045e-06	1_red	srpra
cox6a1	1.97844e-10	0.236018	0.549	0.363	2.95936e-06	1_red	cox6a1
npm1a	2.07112e-10	0.233734	0.389	0.221	3.09798e-06	1_red	npm1a
efna1b	2.15222e-10	0.173037	0.287	0.143	3.2193e-06	1_red	efna1b
nop58	2.32981e-10	0.167524	0.338	0.177	3.48492e-06	1_red	nop58
ednrab	2.60856e-10	0.136803	0.279	0.138	3.90189e-06	1_red	ednrab
idh2	3.10465e-10	0.200349	0.42	0.247	4.64394e-06	1_red	idh2
cycsb	3.72731e-10	0.184141	0.397	0.218	5.57531e-06	1_red	cycsb
odc1	4.89442e-10	0.186525	0.414	0.229	7.32107e-06	1_red	odc1
ndufa4l	5.58691e-10	0.184076	0.851	0.769	8.35689e-06	1_red	ndufa4l
atp5l	6.40678e-10	0.2462	0.575	0.397	9.58325e-06	1_red	atp5l
mpc2	7.2897e-10	0.17029	0.341	0.182	1.09039e-05	1_red	mpc2
rpl17	7.66581e-10	0.115955	1	0.997	1.14665e-05	1_red	rpl17
cyc1	8.3775e-10	0.17126	0.363	0.198	1.25311e-05	1_red	cyc1
slc7a10a	1.00437e-09	0.165366	0.603	0.38	1.50233e-05	1_red	slc7a10a
ptp4a2b	1.13515e-09	0.208258	0.532	0.335	1.69796e-05	1_red	ptp4a2b
rpl19	1.14086e-09	0.104128	1	0.999	1.7065e-05	1_red	rpl19
rps2	1.24068e-09	0.132059	0.994	0.988	1.8558e-05	1_red	rps2
uqcrc2b	1.39871e-09	0.145441	0.206	0.089	2.09219e-05	1_red	uqcrc2b
rps6	1.46623e-09	0.158732	0.952	0.924	2.19319e-05	1_red	rps6
atp5f1e	1.51251e-09	0.240124	0.566	0.393	2.26241e-05	1_red	atp5f1e
rpsa	1.67071e-09	0.134438	0.994	0.983	2.49904e-05	1_red	rpsa
ndufs6	1.77105e-09	0.124701	0.22	0.098	2.64914e-05	1_red	ndufs6
rpl10a	2.05771e-09	0.120493	0.997	0.997	3.07792e-05	1_red	rpl10a
cox8a	2.38517e-09	0.17533	0.735	0.552	3.56773e-05	1_red	cox8a
atp5if1b	2.5781e-09	0.186615	0.515	0.33	3.85632e-05	1_red	atp5if1b
naca	2.86008e-09	0.125605	0.992	0.984	4.27811e-05	1_red	naca
atp5pb	2.8962e-09	0.227011	0.67	0.502	4.33214e-05	1_red	atp5pb
ponzr1	3.07249e-09	0.151807	1	0.965	4.59583e-05	1_red	ponzr1
wu:fb59d01	3.09483e-09	0.113254	0.203	0.091	4.62925e-05	1_red	wu:fb59d01
ndufb5	3.17776e-09	0.168989	0.372	0.212	4.7533e-05	1_red	ndufb5
slc25a3b	3.34372e-09	0.209501	0.755	0.62	5.00153e-05	1_red	slc25a3b
sdha	3.52941e-09	0.155974	0.259	0.129	5.27929e-05	1_red	sdha
limch1b	3.72647e-09	0.11904	0.315	0.171	5.57405e-05	1_red	limch1b
ivns1abpa	4.04883e-09	0.190173	0.997	0.863	6.05624e-05	1_red	ivns1abpa
ppargc1b	4.63234e-09	0.161529	0.538	0.338	6.92905e-05	1_red	ppargc1b
wnt9b	5.41663e-09	0.171171	0.403	0.249	8.1022e-05	1_red	wnt9b
cox6b2	5.55507e-09	0.199143	0.78	0.656	8.30927e-05	1_red	cox6b2
ndufa8	6.51603e-09	0.1572	0.346	0.195	9.74668e-05	1_red	ndufa8
prpsap2	6.74297e-09	0.139268	0.254	0.125	0.000100861	1_red	prpsap2
nme2b.1	6.74694e-09	0.131995	0.992	0.979	0.000100921	1_red	nme2b.1
si:ch211-136a13.1	7.40297e-09	0.129145	0.282	0.151	0.000110734	1_red	si:ch211-136a13.1
slc38a3b	7.43624e-09	0.151003	0.321	0.186	0.000111231	1_red	slc38a3b
mdh2	7.49497e-09	0.228818	0.572	0.405	0.00011211	1_red	mdh2
atp5po	7.70915e-09	0.196378	0.608	0.443	0.000115313	1_red	atp5po
hsf2	8.0042e-09	0.166675	0.285	0.151	0.000119727	1_red	hsf2
ackr4b	8.16698e-09	0.151097	0.682	0.462	0.000122162	1_red	ackr4b
si:dkey-194e6.1	8.53803e-09	0.153373	0.265	0.139	0.000127712	1_red	si:dkey-194e6.1
ampd2b	9.54728e-09	0.140213	0.499	0.329	0.000142808	1_red	ampd2b
denr	9.68305e-09	0.144945	0.231	0.112	0.000144839	1_red	denr
got2b	1.03564e-08	0.142047	0.214	0.1	0.000154911	1_red	got2b
rpl7	1.46231e-08	0.113716	1	0.997	0.000218732	1_red	rpl7
pgm2	1.59692e-08	0.144988	0.535	0.354	0.000238867	1_red	pgm2
ppfibp1b	1.65785e-08	0.116472	0.318	0.179	0.000247982	1_red	ppfibp1b
mrps36	1.72586e-08	0.134349	0.248	0.123	0.000258155	1_red	mrps36
akap13	1.83699e-08	0.160247	0.355	0.21	0.000274777	1_red	akap13
lrp1aa	1.87397e-08	0.131669	0.197	0.092	0.000280309	1_red	lrp1aa
sb:cb81	2.17404e-08	0.168114	0.513	0.343	0.000325192	1_red	sb:cb81
mibp	2.30649e-08	0.148967	0.104	0.033	0.000345005	1_red	mibp
ndufb2	2.35608e-08	0.161304	0.341	0.198	0.000352422	1_red	ndufb2
CTBP1	2.87904e-08	0.13364	0.468	0.302	0.000430646	1_red	CTBP1
col4a6	3.17308e-08	0.188743	0.8	0.667	0.000474629	1_red	col4a6
zgc:193541	3.55988e-08	0.188937	0.558	0.383	0.000532486	1_red	zgc:193541
ano5b	3.65243e-08	0.152983	0.431	0.282	0.00054633	1_red	ano5b
zfand5b	3.69914e-08	0.189896	0.313	0.175	0.000553317	1_red	zfand5b
sdhdb	3.95105e-08	0.133017	0.22	0.107	0.000590998	1_red	sdhdb
cox5aa	4.39447e-08	0.205723	0.538	0.361	0.000657325	1_red	cox5aa
si:dkey-31f5.11	4.54136e-08	0.131536	0.454	0.295	0.000679297	1_red	si:dkey-31f5.11
txn2	4.55963e-08	0.12285	0.206	0.098	0.000682029	1_red	txn2
mt-nd5	4.57678e-08	0.193342	0.507	0.348	0.000684594	1_red	mt-nd5
tdh	4.60309e-08	0.158188	0.546	0.358	0.00068853	1_red	tdh
suclg1	4.61447e-08	0.118836	0.208	0.099	0.000690233	1_red	suclg1
vdac2	5.04484e-08	0.188399	0.651	0.484	0.000754607	1_red	vdac2
ompa	5.15142e-08	0.104108	0.166	0.072	0.000770549	1_red	ompa
ube2nb	5.72269e-08	0.130136	0.217	0.106	0.000856	1_red	ube2nb
bckdk	6.04342e-08	0.14935	0.327	0.186	0.000903976	1_red	bckdk
cct3	6.34961e-08	0.220551	0.363	0.231	0.000949774	1_red	cct3
ndufa2	6.64562e-08	0.114818	0.149	0.062	0.000994052	1_red	ndufa2
drap1	6.77187e-08	0.15096	0.268	0.145	0.00101294	1_red	drap1
hmga1a	6.85531e-08	0.160834	0.285	0.156	0.00102542	1_red	hmga1a
rps17	7.15251e-08	0.201086	0.761	0.639	0.00106987	1_red	rps17
rplp0	8.58571e-08	0.132896	0.992	0.983	0.00128425	1_red	rplp0
cox4i1	8.82708e-08	0.17291	0.82	0.713	0.00132035	1_red	cox4i1
faua	9.09699e-08	0.106597	0.994	0.989	0.00136073	1_red	faua
ndufab1b	9.60851e-08	0.124987	0.282	0.152	0.00143724	1_red	ndufab1b
atp5mc3a	1.01216e-07	0.172862	0.546	0.369	0.00151399	1_red	atp5mc3a
mych	1.08531e-07	0.123096	0.208	0.101	0.00162341	1_red	mych
apmap	1.10058e-07	0.151268	0.245	0.13	0.00164625	1_red	apmap
cygb1	1.13318e-07	0.180405	0.451	0.288	0.001695	1_red	cygb1
si:ch211-132b12.7	1.13489e-07	0.142334	0.332	0.202	0.00169757	1_red	si:ch211-132b12.7
tspan18a	1.18781e-07	0.113487	0.183	0.087	0.00177673	1_red	tspan18a
hsp90ab1	1.33898e-07	0.134368	0.994	0.981	0.00200284	1_red	hsp90ab1
msi2a	1.38762e-07	0.127115	0.456	0.3	0.0020756	1_red	msi2a
aldoaa	1.45977e-07	0.157851	0.955	0.83	0.00218353	1_red	aldoaa
ldhba	1.47953e-07	0.192968	0.437	0.283	0.00221307	1_red	ldhba
rpl9.1	1.48927e-07	0.106639	0.997	0.995	0.00222764	1_red	rpl9.1
mafba	1.6984e-07	0.186828	0.341	0.203	0.00254047	1_red	mafba
mrpl12	1.76768e-07	0.133167	0.158	0.07	0.0026441	1_red	mrpl12
nhsl2	2.14126e-07	0.136189	0.51	0.335	0.0032029	1_red	nhsl2
rps5	2.36165e-07	0.100577	0.997	0.997	0.00353255	1_red	rps5
zgc:194839	2.42378e-07	0.130843	0.31	0.186	0.00362549	1_red	zgc:194839
sdhb	2.45566e-07	0.120803	0.293	0.163	0.00367317	1_red	sdhb
pno1	2.50573e-07	0.154453	0.358	0.222	0.00374807	1_red	pno1
rack1	2.54045e-07	0.114448	0.994	0.985	0.00380001	1_red	rack1
cct4	2.57669e-07	0.16031	0.428	0.279	0.00385421	1_red	cct4
cd3eap	2.65759e-07	0.1016	0.132	0.054	0.00397523	1_red	cd3eap
btf3	2.71254e-07	0.176906	0.856	0.769	0.00405741	1_red	btf3
ndufab1a	2.78942e-07	0.136253	0.268	0.148	0.00417242	1_red	ndufab1a
hey2	2.97577e-07	0.169093	0.67	0.471	0.00445116	1_red	hey2
ccser2a	3.0469e-07	0.131094	0.442	0.297	0.00455755	1_red	ccser2a
hspa9	3.16992e-07	0.105756	0.282	0.155	0.00474157	1_red	hspa9
uqcrb	3.19764e-07	0.130296	0.462	0.297	0.00478303	1_red	uqcrb
atp1b3a	3.2155e-07	0.133469	0.285	0.169	0.00480975	1_red	atp1b3a
c1qbp	3.28838e-07	0.12163	0.31	0.176	0.00491876	1_red	c1qbp
ddx21	3.29307e-07	0.162349	0.417	0.277	0.00492578	1_red	ddx21
rwdd1	3.4166e-07	0.12847	0.197	0.098	0.00511056	1_red	rwdd1
ndufa6	3.55319e-07	0.153006	0.349	0.213	0.00531486	1_red	ndufa6
her15.1	3.71238e-07	0.197408	0.158	0.071	0.00555298	1_red	her15.1
uqcrfs1	3.89685e-07	0.147632	0.42	0.268	0.00582891	1_red	uqcrfs1
eif4g1a	4.04763e-07	0.137983	0.282	0.159	0.00605444	1_red	eif4g1a
si:ch211-156j16.1	4.51891e-07	0.170339	0.394	0.253	0.00675939	1_red	si:ch211-156j16.1
sept7a	4.65243e-07	0.161316	0.437	0.283	0.0069591	1_red	sept7a
ndufs7	4.68632e-07	0.137701	0.332	0.202	0.00700979	1_red	ndufs7
serpinh1a	4.72853e-07	0.119792	0.411	0.269	0.00707294	1_red	serpinh1a
ndufv3	4.82531e-07	0.120738	0.211	0.107	0.0072177	1_red	ndufv3
atrx	5.30106e-07	0.167021	0.746	0.622	0.00792933	1_red	atrx
celsr1a	5.99945e-07	0.113798	0.31	0.189	0.00897397	1_red	celsr1a
kars	6.14013e-07	0.123422	0.203	0.104	0.0091844	1_red	kars
vdac3	6.46805e-07	0.145312	0.287	0.168	0.00967491	1_red	vdac3
antxr1c	7.765e-07	0.163807	0.558	0.394	0.0116149	1_red	antxr1c
vbp1	7.93935e-07	0.107907	0.169	0.08	0.0118757	1_red	vbp1
ppp2cb	7.99878e-07	0.159948	0.431	0.292	0.0119646	1_red	ppp2cb
znf395b	8.0541e-07	0.137837	0.425	0.274	0.0120473	1_red	znf395b
ddt	8.15112e-07	0.158479	0.355	0.222	0.0121924	1_red	ddt
her15.2	8.24764e-07	0.213144	0.118	0.048	0.0123368	1_red	her15.2
tmed10	9.10281e-07	0.147327	0.47	0.319	0.013616	1_red	tmed10
ptgr1	9.70151e-07	0.133455	0.192	0.098	0.0145115	1_red	ptgr1
gpia	9.82672e-07	0.128615	0.242	0.134	0.0146988	1_red	gpia
mrps2	1.03355e-06	0.103474	0.262	0.153	0.0154599	1_red	mrps2
ndufb9	1.15661e-06	0.128143	0.386	0.245	0.0173005	1_red	ndufb9
fth1a	1.25208e-06	0.206575	0.687	0.588	0.0187286	1_red	fth1a
hnrnpa0b	1.312e-06	0.154675	0.532	0.371	0.019625	1_red	hnrnpa0b
mrpl36	1.39162e-06	0.134984	0.256	0.146	0.0208158	1_red	mrpl36
nrp2a	1.39615e-06	0.117366	0.654	0.479	0.0208835	1_red	nrp2a
cnbpa	1.47691e-06	0.146273	0.49	0.34	0.0220917	1_red	cnbpa
cct7	1.56684e-06	0.15229	0.47	0.326	0.0234368	1_red	cct7
tbca	1.63008e-06	0.13648	0.372	0.242	0.0243827	1_red	tbca
id3	1.89186e-06	0.165482	0.623	0.454	0.0282984	1_red	id3
vwde	2.01645e-06	0.111089	0.144	0.067	0.0301621	1_red	vwde
ndufs3	2.15454e-06	0.11666	0.18	0.091	0.0322277	1_red	ndufs3
zgc:123105	2.25599e-06	0.13652	0.327	0.202	0.0337452	1_red	zgc:123105
ndufs5	2.32e-06	0.117374	0.251	0.142	0.0347026	1_red	ndufs5
atp5mc1	2.39464e-06	0.188134	0.299	0.184	0.035819	1_red	atp5mc1
myl9a	2.40465e-06	0.135381	0.814	0.688	0.0359688	1_red	myl9a
cishb	2.48599e-06	0.131348	0.301	0.18	0.0371855	1_red	cishb
chd4b	2.55328e-06	0.13506	0.251	0.146	0.0381919	1_red	chd4b
ndufa3	3.09244e-06	0.105445	0.245	0.137	0.0462567	1_red	ndufa3
her4.1	3.11906e-06	0.226105	0.225	0.126	0.0466549	1_red	her4.1
swap70b	3.26182e-06	0.106005	0.29	0.172	0.0487903	1_red	swap70b
atp5md	3.27325e-06	0.105803	0.327	0.196	0.0489613	1_red	atp5md
nrarpb	3.29946e-06	0.121122	0.366	0.24	0.0493533	1_red	nrarpb
chac1	3.57307e-06	0.209732	0.628	0.507	0.053446	1_red	chac1
ndufs2	3.88452e-06	0.109995	0.223	0.123	0.0581046	1_red	ndufs2
agap1	3.99767e-06	0.106874	0.327	0.209	0.0597972	1_red	agap1
ADGRL3	4.08751e-06	0.120716	0.408	0.279	0.0611409	1_red	ADGRL3
prdx3	4.19677e-06	0.109677	0.194	0.103	0.0627752	1_red	prdx3
rpl3	4.33033e-06	0.127229	0.946	0.927	0.064773	1_red	rpl3
rps18	4.37729e-06	0.120296	0.927	0.901	0.0654756	1_red	rps18
magoh	4.43485e-06	0.109055	0.192	0.1	0.0663364	1_red	magoh
gne	4.56411e-06	0.117722	0.107	0.045	0.06827	1_red	gne
ran	4.77129e-06	0.179279	0.713	0.594	0.071369	1_red	ran
ncl	4.9551e-06	0.161493	0.575	0.428	0.0741185	1_red	ncl
ndufa1	5.01463e-06	0.143554	0.335	0.215	0.0750088	1_red	ndufa1
atp5mf	5.0344e-06	0.140549	0.361	0.231	0.0753045	1_red	atp5mf
eif4ebp1	5.58568e-06	0.137764	0.614	0.453	0.0835505	1_red	eif4ebp1
nop56	5.63038e-06	0.136733	0.425	0.291	0.0842192	1_red	nop56
ndufb8	5.84382e-06	0.130498	0.546	0.39	0.0874118	1_red	ndufb8
fam120a	5.98954e-06	0.121751	0.535	0.39	0.0895916	1_red	fam120a
trnau1apb	6.51406e-06	0.106698	0.163	0.083	0.0974372	1_red	trnau1apb
basp1	6.63357e-06	0.111422	0.38	0.254	0.0992249	1_red	basp1
wnt4a	6.99518e-06	0.11895	0.589	0.41	0.104634	1_red	wnt4a
ptbp3	7.10412e-06	0.116722	0.383	0.267	0.106263	1_red	ptbp3
si:ch211-191j22.3	7.3241e-06	0.101259	0.254	0.148	0.109554	1_red	si:ch211-191j22.3
naprt	7.51563e-06	0.113346	0.383	0.263	0.112419	1_red	naprt
STMP1	7.75265e-06	0.11296	0.375	0.243	0.115964	1_red	STMP1
pttg1ipb	8.54211e-06	0.137115	0.2	0.112	0.127773	1_red	pttg1ipb
dldh	9.35403e-06	0.110068	0.239	0.139	0.139918	1_red	dldh
mrpl54	9.63379e-06	0.101343	0.197	0.107	0.144102	1_red	mrpl54
bambia	1.10432e-05	0.12354	0.73	0.561	0.165184	1_red	bambia
elocb	1.11736e-05	0.107212	0.324	0.204	0.167134	1_red	elocb
snu13b	1.1662e-05	0.123547	0.197	0.107	0.17444	1_red	snu13b
ndufa11	1.25499e-05	0.10596	0.192	0.104	0.187722	1_red	ndufa11
aldh6a1	1.2695e-05	0.112388	0.262	0.157	0.189892	1_red	aldh6a1
pabpc1a	1.32762e-05	0.157838	0.685	0.578	0.198585	1_red	pabpc1a
smad2	1.37036e-05	0.139613	0.4	0.271	0.204979	1_red	smad2
crip2	1.41934e-05	0.118197	0.307	0.202	0.212304	1_red	crip2
cyth1a.1	1.43741e-05	0.135442	0.251	0.156	0.215007	1_red	cyth1a.1
pgk1	1.61655e-05	0.104455	0.276	0.168	0.241804	1_red	pgk1
bhlhe41	1.62825e-05	0.103455	0.265	0.165	0.243553	1_red	bhlhe41
BX284696.1	1.71822e-05	0.201593	0.358	0.253	0.257011	1_red	BX284696.1
atp5mea	1.82275e-05	0.132784	0.366	0.249	0.272647	1_red	atp5mea
TXN	2.09157e-05	0.150676	0.763	0.651	0.312858	1_red	TXN
pkma	2.1775e-05	0.128341	0.769	0.62	0.32571	1_red	pkma
eef1da	2.18536e-05	0.15284	0.524	0.383	0.326886	1_red	eef1da
ier2b	2.25343e-05	0.143117	0.865	0.714	0.337067	1_red	ier2b
serpine1	2.26406e-05	0.10977	0.208	0.119	0.338658	1_red	serpine1
atp5if1a	2.27237e-05	0.14009	0.301	0.192	0.339902	1_red	atp5if1a
her4.2	2.41826e-05	0.118032	0.175	0.096	0.361724	1_red	her4.2
pim2	2.45273e-05	0.128305	0.518	0.371	0.366879	1_red	pim2
rpl22l1	2.56616e-05	0.165053	0.518	0.387	0.383846	1_red	rpl22l1
eif4ebp3l	2.67328e-05	0.108082	0.499	0.346	0.39987	1_red	eif4ebp3l
metrn	2.76168e-05	0.105418	0.603	0.443	0.413092	1_red	metrn
etfa	3.0269e-05	0.107835	0.225	0.136	0.452763	1_red	etfa
hmgb1b	3.05361e-05	0.128335	0.532	0.384	0.456759	1_red	hmgb1b
tomm7	3.16082e-05	0.100134	0.273	0.168	0.472796	1_red	tomm7
ctsla	3.54028e-05	0.126502	0.738	0.611	0.529556	1_red	ctsla
h3f3b.1.1	3.62797e-05	0.133696	0.772	0.678	0.542672	1_red	h3f3b.1.1
prmt1	3.67037e-05	0.11417	0.214	0.125	0.549013	1_red	prmt1
ttll12	4.05921e-05	0.124767	0.211	0.127	0.607177	1_red	ttll12
dab2ipb	4.43453e-05	0.108415	0.496	0.364	0.663317	1_red	dab2ipb
ube2v2	4.62721e-05	0.125368	0.437	0.31	0.692138	1_red	ube2v2
eef1b2	4.83101e-05	0.143585	0.879	0.823	0.722622	1_red	eef1b2
sept9a	4.85244e-05	0.106722	0.544	0.399	0.725828	1_red	sept9a
seta	4.89103e-05	0.104818	0.445	0.318	0.7316	1_red	seta
wsb1	6.20438e-05	0.106144	0.248	0.155	0.928051	1_red	wsb1
si:dkey-73n10.1	6.38902e-05	0.110895	0.507	0.358	0.955669	1_red	si:dkey-73n10.1
gmnn	6.39735e-05	0.13163	0.69	0.547	0.956915	1_red	gmnn
ndufb4	6.81323e-05	0.116538	0.338	0.23	1	1_red	ndufb4
eif3m	7.48607e-05	0.166556	0.583	0.462	1	1_red	eif3m
rpl5b	7.48667e-05	0.137966	0.842	0.751	1	1_red	rpl5b
setb	7.57563e-05	0.132163	0.369	0.258	1	1_red	setb
uqcrq	7.689e-05	0.114736	0.361	0.249	1	1_red	uqcrq
RASSF5	7.76064e-05	0.101057	0.299	0.201	1	1_red	RASSF5
ranbp1	9.48365e-05	0.105474	0.423	0.302	1	1_red	ranbp1
eif2s1b	0.000104047	0.110214	0.372	0.259	1	1_red	eif2s1b
bzw1b	0.000120863	0.110189	0.383	0.263	1	1_red	bzw1b
fbl	0.000135397	0.105447	0.251	0.159	1	1_red	fbl
si:dkey-42i9.4	0.000157047	0.101124	0.372	0.262	1	1_red	si:dkey-42i9.4
h3f3d	0.000162053	0.122518	0.803	0.733	1	1_red	h3f3d
rpl29	0.000192468	0.122477	0.848	0.774	1	1_red	rpl29
dkc1	0.00021577	0.100877	0.211	0.13	1	1_red	dkc1
skp1	0.000216258	0.103849	0.487	0.362	1	1_red	skp1
eif2s3	0.000273142	0.114667	0.417	0.306	1	1_red	eif2s3
hspb11	0.00028878	0.181375	0.076	0.033	1	1_red	hspb11
eif3f	0.000291425	0.132836	0.735	0.615	1	1_red	eif3f
h3f3b.1.2	0.000301227	0.101249	0.47	0.351	1	1_red	h3f3b.1.2
trib3	0.000306392	0.119777	0.197	0.123	1	1_red	trib3
hspa8	0.000325521	0.18241	0.673	0.57	1	1_red	hspa8
eif3ba	0.000339018	0.106868	0.392	0.286	1	1_red	eif3ba
ctnnb1	0.000367573	0.104766	0.465	0.353	1	1_red	ctnnb1
map1lc3a	0.000371035	0.103859	0.468	0.346	1	1_red	map1lc3a
hnrnpa1b	0.000376588	0.10321	0.366	0.259	1	1_red	hnrnpa1b
agtr2	0.000399207	0.10808	0.282	0.193	1	1_red	agtr2
rbm8a	0.000436869	0.101775	0.397	0.292	1	1_red	rbm8a
aldh1a2	0.000443508	0.106538	0.71	0.603	1	1_red	aldh1a2
sat1a.2	0.000490913	0.109593	0.617	0.516	1	1_red	sat1a.2
tcp1	0.000575566	0.111672	0.352	0.258	1	1_red	tcp1
hspe1	0.000589085	0.107897	0.786	0.663	1	1_red	hspe1
plk3	0.000674591	0.106236	0.259	0.178	1	1_red	plk3
mgst1.2	0.000677426	0.103793	0.208	0.135	1	1_red	mgst1.2
cirbpa	0.000695989	0.138731	0.496	0.389	1	1_red	cirbpa
hnrnpabb	0.00110181	0.110537	0.346	0.247	1	1_red	hnrnpabb
her6	0.00179572	0.14404	0.594	0.541	1	1_red	her6
rpl4	0.00184864	0.119539	0.639	0.547	1	1_red	rpl4
si:busm1-57f23.1	0.00201493	0.121013	0.313	0.227	1	1_red	si:busm1-57f23.1
rpl6	0.00211845	0.133467	0.637	0.551	1	1_red	rpl6
khdrbs1a	0.00217425	0.125338	0.549	0.448	1	1_red	khdrbs1a
prkab1b	0.00224412	0.100831	0.366	0.274	1	1_red	prkab1b
igf2b	0.00298629	0.178144	0.358	0.288	1	1_red	igf2b
hsp70.2	7.49717e-87	0.782751	0.997	0.896	1.12143e-82	1_yellow	hsp70.2
hsp70.3	2.44225e-82	0.792797	0.994	0.863	3.65311e-78	1_yellow	hsp70.3
fosab	2.0547e-79	0.604672	1	0.941	3.07342e-75	1_yellow	fosab
mycb1	3.01688e-77	0.924791	0.963	0.777	4.51264e-73	1_yellow	mycb
jun	5.69138e-75	0.595204	1	0.934	8.51317e-71	1_yellow	jun
btg2	1.19688e-73	0.644609	1	0.907	1.79029e-69	1_yellow	btg2
hsp70.1	7.04148e-72	0.746357	0.994	0.88	1.05326e-67	1_yellow	hsp70.1
phlda21	2.20948e-66	0.922736	0.949	0.787	3.30493e-62	1_yellow	phlda2
gadd45ba	4.93355e-59	0.703253	0.98	0.854	7.37961e-55	1_yellow	gadd45ba
junba	2.5692e-54	0.630041	0.986	0.865	3.843e-50	1_yellow	junba
mcl1a	1.78912e-51	0.711867	0.943	0.733	2.67617e-47	1_yellow	mcl1a
socs3a	1.04571e-48	0.56667	0.989	0.916	1.56417e-44	1_yellow	socs3a
f3b	2.08351e-46	0.812197	0.855	0.541	3.11651e-42	1_yellow	f3b
fosl1a	1.036e-45	0.632567	0.889	0.577	1.54965e-41	1_yellow	fosl1a
sdc4	6.18948e-42	0.645919	0.864	0.591	9.25823e-38	1_yellow	sdc4
sat1a.21	1.01176e-39	0.717348	0.764	0.48	1.51339e-35	1_yellow	sat1a.2
atf3	4.5153e-38	0.833589	0.676	0.367	6.75399e-34	1_yellow	atf3
UBB	4.29183e-37	0.708408	0.776	0.539	6.41973e-33	1_yellow	UBB
atf4b	4.451e-37	0.458242	0.898	0.727	6.65781e-33	1_yellow	atf4b
cishb1	2.77306e-34	0.652877	0.423	0.151	4.14795e-30	1_yellow	cishb
glulb1	3.32732e-34	0.450707	0.991	0.854	4.97701e-30	1_yellow	glulb
higd1a	1.3433e-33	0.522165	0.631	0.34	2.00931e-29	1_yellow	higd1a
hsp70l	3.08191e-32	0.683314	0.835	0.633	4.60992e-28	1_yellow	hsp70l
jdp2b	1.74681e-31	0.485124	0.957	0.804	2.61287e-27	1_yellow	jdp2b
hsp90aa1.2	4.68747e-31	0.623762	0.841	0.592	7.01152e-27	1_yellow	hsp90aa1.2
ddit3	1.02295e-30	0.592168	0.798	0.586	1.53013e-26	1_yellow	ddit3
arrdc3a1	8.01002e-30	0.597423	0.656	0.386	1.19814e-25	1_yellow	arrdc3a
prelid3b	1.35227e-29	0.564928	0.534	0.272	2.02272e-25	1_yellow	prelid3b
dnajb1b	3.21349e-29	0.494862	0.861	0.631	4.80673e-25	1_yellow	dnajb1b
ier2b1	5.90202e-29	0.481956	0.906	0.705	8.82825e-25	1_yellow	ier2b
pnp4a1	1.21181e-28	0.525259	0.855	0.61	1.81263e-24	1_yellow	pnp4a
ier2a	2.9022e-28	0.408432	0.875	0.662	4.34112e-24	1_yellow	ier2a
cldn11a1	3.18774e-28	0.359445	0.997	0.955	4.76822e-24	1_yellow	cldn11a
egr1	1.39591e-27	0.405648	0.878	0.618	2.088e-23	1_yellow	egr1
her21	9.54323e-27	0.941854	0.599	0.356	1.42748e-22	1_yellow	her2
junbb	9.05487e-26	0.503592	0.611	0.382	1.35443e-21	1_yellow	junbb
slc25a51	3.67416e-25	0.249077	1	0.997	5.49581e-21	1_yellow	slc25a5
ecm1b1	1.08555e-23	0.354959	0.989	0.835	1.62376e-19	1_yellow	ecm1b
nrarpa1	1.89943e-23	0.411215	0.807	0.593	2.84117e-19	1_yellow	nrarpa
angptl41	1.36234e-21	0.581093	0.642	0.385	2.0378e-17	1_yellow	angptl4
fosb	1.71895e-21	0.281671	0.974	0.807	2.5712e-17	1_yellow	fosb
dusp1	2.42278e-21	0.558546	0.537	0.315	3.624e-17	1_yellow	dusp1
ier5	3.1261e-21	0.37992	0.778	0.537	4.67602e-17	1_yellow	ier5
tsc22d1	3.85598e-21	0.54011	0.432	0.221	5.76778e-17	1_yellow	tsc22d1
egr2b	1.28078e-20	0.622542	0.281	0.102	1.91579e-16	1_yellow	egr2b
pim21	4.71735e-19	0.434827	0.562	0.361	7.05621e-15	1_yellow	pim2
klf6a	5.21834e-19	0.377656	0.923	0.811	7.80559e-15	1_yellow	klf6a
errfi1a1	1.21528e-18	0.342603	0.486	0.267	1.81781e-14	1_yellow	errfi1a
chac11	1.31636e-18	0.504315	0.668	0.498	1.96901e-14	1_yellow	chac1
ctsla1	1.45149e-18	0.459216	0.767	0.604	2.17114e-14	1_yellow	ctsla
actb1	6.75731e-18	0.341998	0.94	0.863	1.01076e-13	1_yellow	actb1
myclb1	2.33334e-17	0.514026	0.511	0.322	3.4902e-13	1_yellow	myclb
appa1	2.52043e-16	0.266318	0.915	0.79	3.77005e-12	1_yellow	appa
pim1	3.0606e-16	0.354186	0.81	0.603	4.57805e-12	1_yellow	pim1
ppargc1b1	6.09733e-16	0.340495	0.545	0.337	9.12039e-12	1_yellow	ppargc1b
nrarpb1	9.67876e-16	0.229955	0.432	0.224	1.44775e-11	1_yellow	nrarpb
jund	1.83429e-15	0.333711	0.685	0.485	2.74373e-11	1_yellow	jund
sdk1a1	4.58901e-15	0.171075	0.307	0.133	6.86424e-11	1_yellow	sdk1a
trib31	5.7488e-15	0.405859	0.259	0.108	8.59906e-11	1_yellow	trib3
hspa81	6.81283e-15	0.377712	0.682	0.568	1.01906e-10	1_yellow	hspa8
her61	4.20562e-14	0.530447	0.679	0.521	6.29076e-10	1_yellow	her6
arg2	5.003e-14	0.137445	0.168	0.051	7.48348e-10	1_yellow	arg2
btbd6a	5.12399e-14	0.1897	0.389	0.203	7.66447e-10	1_yellow	btbd6a
bag3	8.16556e-14	0.219554	0.307	0.138	1.2214e-09	1_yellow	bag3
mef2aa1	8.56695e-14	0.225841	0.497	0.298	1.28144e-09	1_yellow	mef2aa
uck2a1	9.65757e-14	0.305222	0.608	0.393	1.44458e-09	1_yellow	uck2a
bhlhe40	1.41947e-13	0.335055	0.722	0.58	2.12324e-09	1_yellow	bhlhe40
egr2a	1.65186e-13	0.4686	0.338	0.18	2.47085e-09	1_yellow	egr2a
dclk1a	2.19326e-13	0.203734	0.264	0.112	3.28068e-09	1_yellow	dclk1a
zfand5b1	2.28454e-13	0.455919	0.324	0.172	3.41722e-09	1_yellow	zfand5b
dusp2	3.18155e-13	0.387637	0.58	0.393	4.75896e-09	1_yellow	dusp2
eya21	1.63456e-12	0.202249	0.403	0.227	2.44498e-08	1_yellow	eya2
si:dkey-240h12.3	2.12117e-12	0.151177	0.244	0.104	3.17284e-08	1_yellow	si:dkey-240h12.3
maff	4.4423e-12	0.203842	0.463	0.279	6.64479e-08	1_yellow	maff
ubb	5.16769e-12	0.386543	0.747	0.639	7.72983e-08	1_yellow	ubb
ccnl1a	9.40139e-12	0.277493	0.412	0.254	1.40626e-07	1_yellow	ccnl1a
hspb1	1.53016e-11	0.511859	0.685	0.58	2.28881e-07	1_yellow	hspb1
cebpb	1.86564e-11	0.504681	0.67	0.526	2.79062e-07	1_yellow	cebpb
si:dkey-194e6.11	3.98437e-11	0.148207	0.281	0.135	5.95982e-07	1_yellow	si:dkey-194e6.1
btg1	1.07498e-10	0.291475	0.795	0.689	1.60796e-06	1_yellow	btg1
cish	1.14773e-10	0.181542	0.259	0.124	1.71677e-06	1_yellow	cish
dap1b1	1.46212e-10	0.22502	0.991	0.871	2.18704e-06	1_yellow	dap1b
mafba1	1.82051e-10	0.39258	0.341	0.203	2.72312e-06	1_yellow	mafba
serpine11	2.80662e-10	0.538918	0.233	0.113	4.19815e-06	1_yellow	serpine1
srpra1	3.2626e-10	0.227248	0.801	0.659	4.88019e-06	1_yellow	srpra
notch31	4.24591e-10	0.212545	0.991	0.797	6.35103e-06	1_yellow	notch3
egr3	6.20223e-10	0.179887	0.264	0.131	9.2773e-06	1_yellow	egr3
kidins220a1	1.0545e-09	0.208952	0.506	0.342	1.57732e-05	1_yellow	kidins220a
hsd17b11	1.09013e-09	0.189488	0.849	0.668	1.63062e-05	1_yellow	hsd17b1
ptp4a2b1	1.13843e-09	0.252842	0.5	0.344	1.70286e-05	1_yellow	ptp4a2b
cycsb1	1.24139e-09	0.325654	0.361	0.227	1.85687e-05	1_yellow	cycsb
oaz1b1	1.80352e-09	0.205837	0.875	0.799	2.6977e-05	1_yellow	oaz1b
rhoab	3.7961e-09	0.359164	0.412	0.282	5.67821e-05	1_yellow	rhoab
sos11	4.30281e-09	0.146713	0.361	0.215	6.43615e-05	1_yellow	sos1
pnp5a1	5.1081e-09	0.284302	0.591	0.45	7.64069e-05	1_yellow	pnp5a
slc7a111	5.92583e-09	0.157771	0.361	0.212	8.86386e-05	1_yellow	slc7a11
id31	8.42848e-09	0.378381	0.585	0.463	0.000126073	1_yellow	id3
oaz1a1	8.96304e-09	0.170337	0.98	0.915	0.000134069	1_yellow	oaz1a
hprt11	1.16718e-08	0.269554	0.42	0.281	0.000174587	1_yellow	hprt1
celsr1a1	1.69112e-08	0.113831	0.327	0.185	0.000252958	1_yellow	celsr1a
si:ch73-217n20.11	1.87109e-08	0.160961	0.344	0.207	0.000279878	1_yellow	si:ch73-217n20.1
lfng	1.96313e-08	0.186686	0.131	0.05	0.000293645	1_yellow	lfng
gmps1	2.27274e-08	0.192833	0.832	0.685	0.000339956	1_yellow	gmps
pgm21	2.33851e-08	0.166848	0.528	0.356	0.000349795	1_yellow	pgm2
atp5mc3b1	2.4664e-08	0.17215	0.923	0.88	0.000368924	1_yellow	atp5mc3b
mknk2b	2.50426e-08	0.287852	0.656	0.553	0.000374587	1_yellow	mknk2b
colec111	3.01735e-08	0.2365	0.48	0.341	0.000451336	1_yellow	colec11
her4.21	3.4533e-08	0.234849	0.193	0.091	0.000516545	1_yellow	her4.2
hey1	4.05857e-08	0.128778	0.23	0.117	0.00060708	1_yellow	hey1
il4r.1.1	4.21929e-08	0.120157	0.216	0.107	0.000631122	1_yellow	il4r.1.1
mych1	4.53883e-08	0.250003	0.202	0.103	0.000678919	1_yellow	mych
plekho1b	5.8216e-08	0.12153	0.318	0.186	0.000870795	1_yellow	plekho1b
rsrp1	6.54735e-08	0.217463	0.568	0.438	0.000979352	1_yellow	rsrp1
cdh11	1.06012e-07	0.167368	0.886	0.75	0.00158573	1_yellow	cdh1
cry2	1.12666e-07	0.158857	0.384	0.253	0.00168527	1_yellow	cry2
zgc:162730	1.13445e-07	0.387633	0.608	0.49	0.00169691	1_yellow	zgc:162730
cbx4	1.18607e-07	0.153552	0.415	0.272	0.00177412	1_yellow	cbx4
tdh1	1.25228e-07	0.260681	0.503	0.369	0.00187316	1_yellow	tdh
atf4a	1.41374e-07	0.277014	0.5	0.401	0.00211468	1_yellow	atf4a
ptprfb1	1.56028e-07	0.202938	0.625	0.469	0.00233386	1_yellow	ptprfb
eif1b	2.33225e-07	0.192522	0.815	0.776	0.00348857	1_yellow	eif1b
CTBP11	2.37087e-07	0.161348	0.443	0.308	0.00354635	1_yellow	CTBP1
inhbaa1	2.94132e-07	0.235151	0.511	0.382	0.00439963	1_yellow	inhbaa
vegfaa	3.7798e-07	0.126415	0.497	0.342	0.00565382	1_yellow	vegfaa
gmnn1	4.5622e-07	0.21312	0.673	0.551	0.00682414	1_yellow	gmnn
wnt4a1	4.7149e-07	0.234888	0.551	0.42	0.00705255	1_yellow	wnt4a
atp5fa11	4.95086e-07	0.19653	0.727	0.628	0.00740549	1_yellow	atp5fa1
ivns1abpa1	5.24689e-07	0.163982	0.997	0.863	0.0078483	1_yellow	ivns1abpa
fbln51	6.40727e-07	0.292846	0.273	0.164	0.00958399	1_yellow	fbln5
slc20a1b	8.03045e-07	0.170441	0.134	0.059	0.0120119	1_yellow	slc20a1b
prnprs3	9.80708e-07	0.100906	0.27	0.158	0.0146694	1_yellow	prnprs3
jam3b	1.06629e-06	0.122041	0.335	0.214	0.0159496	1_yellow	jam3b
mpped2	1.2369e-06	0.105874	0.213	0.116	0.0185015	1_yellow	mpped2
sort1a1	1.48095e-06	0.132763	0.412	0.282	0.0221521	1_yellow	sort1a
her4.11	1.4932e-06	0.209306	0.227	0.126	0.0223354	1_yellow	her4.1
tp53i11b	1.94925e-06	0.102524	0.344	0.217	0.0291569	1_yellow	tp53i11b
csrnp1b	2.01448e-06	0.162831	0.33	0.218	0.0301327	1_yellow	csrnp1b
depdc7a	2.16276e-06	0.126413	0.156	0.077	0.0323505	1_yellow	depdc7a
si:dkey-73n10.11	3.15479e-06	0.241907	0.474	0.366	0.0471894	1_yellow	si:dkey-73n10.1
arl4ab	3.17283e-06	0.148798	0.349	0.236	0.0474592	1_yellow	arl4ab
srsf5a	3.32325e-06	0.159641	0.71	0.624	0.0497092	1_yellow	srsf5a
dlc1	3.93374e-06	0.11226	0.239	0.14	0.058841	1_yellow	dlc1
rbp51	6.59891e-06	0.216043	0.355	0.25	0.0987065	1_yellow	rbp5
si:dkeyp-113d7.1	6.64265e-06	0.113821	0.358	0.242	0.0993608	1_yellow	si:dkeyp-113d7.1
ppfibp1b1	6.81271e-06	0.132216	0.29	0.186	0.101905	1_yellow	ppfibp1b
si:dkey-31f5.111	7.40798e-06	0.124348	0.429	0.301	0.110809	1_yellow	si:dkey-31f5.11
si:dkey-23i12.7	7.72537e-06	0.15219	0.236	0.139	0.115556	1_yellow	si:dkey-23i12.7
rgcc1	7.81241e-06	0.274027	0.259	0.163	0.116858	1_yellow	rgcc
col28a2b	8.04864e-06	0.101666	0.122	0.056	0.120392	1_yellow	col28a2b
si:ch211-147a11.3	8.81568e-06	0.115918	0.287	0.183	0.131865	1_yellow	si:ch211-147a11.3
cldn11b	1.17355e-05	0.103057	0.466	0.34	0.175539	1_yellow	cldn11b
bhlhe411	1.46534e-05	0.11927	0.264	0.165	0.219185	1_yellow	bhlhe41
atp1a1a.11	1.71111e-05	0.129315	0.841	0.786	0.255947	1_yellow	atp1a1a.1
insig1	1.96062e-05	0.108174	0.256	0.158	0.29327	1_yellow	insig1
her4.2.11	2.22615e-05	0.173861	0.21	0.124	0.332988	1_yellow	her4.2.1
cyp2x12.11	2.24754e-05	0.103428	0.278	0.176	0.336187	1_yellow	cyp2x12.1
ampd2b1	2.2716e-05	0.110087	0.46	0.339	0.339786	1_yellow	ampd2b
dab2ipb1	2.29516e-05	0.118978	0.486	0.367	0.34331	1_yellow	dab2ipb
nupr1b1	2.32888e-05	0.549643	0.46	0.385	0.348354	1_yellow	nupr1b
hmgn3	2.72817e-05	0.130459	0.435	0.318	0.40808	1_yellow	hmgn3
slc38a41	2.93312e-05	0.138928	0.457	0.342	0.438736	1_yellow	slc38a4
cldn7a1	4.1943e-05	0.196382	0.56	0.46	0.627384	1_yellow	cldn7a
nr4a1	4.34696e-05	0.207578	0.131	0.068	0.650218	1_yellow	nr4a1
ccser2a1	4.43195e-05	0.102773	0.418	0.303	0.662931	1_yellow	ccser2a
zgc:152652	6.39968e-05	0.338652	0.125	0.064	0.957265	1_yellow	zgc:152652
her15.11	6.61706e-05	0.651056	0.139	0.075	0.98978	1_yellow	her15.1
rasd11	6.65646e-05	0.19949	0.185	0.108	0.995673	1_yellow	rasd1
il11ra	7.1581e-05	0.106053	0.386	0.279	1	1_yellow	il11ra
plk2b	7.77851e-05	0.105768	0.213	0.13	1	1_yellow	plk2b
tob1b	8.89167e-05	0.145069	0.642	0.557	1	1_yellow	tob1b
h3f3d1	0.00010164	0.124704	0.784	0.737	1	1_yellow	h3f3d
ubc	0.000149545	0.171128	0.716	0.71	1	1_yellow	ubc
agtr21	0.000150868	0.100422	0.281	0.194	1	1_yellow	agtr2
ppl1	0.00015136	0.106883	0.483	0.36	1	1_yellow	ppl
impdh1b1	0.000177489	0.140802	0.384	0.288	1	1_yellow	impdh1b
ccdc3a	0.000227607	0.10464	0.415	0.312	1	1_yellow	ccdc3a
atp5f1b1	0.000228837	0.147836	0.67	0.633	1	1_yellow	atp5f1b
slc38a5b1	0.000262193	0.158642	0.491	0.413	1	1_yellow	slc38a5b
si:dkey-225k4.11	0.000264884	0.143124	0.278	0.196	1	1_yellow	si:dkey-225k4.1
phactr4a	0.000339824	0.102175	0.366	0.275	1	1_yellow	phactr4a
amotl2b	0.000351024	0.171124	0.347	0.258	1	1_yellow	amotl2b
pik3ip11	0.000389295	0.114755	0.56	0.445	1	1_yellow	pik3ip1
cebpd	0.000395826	0.219416	0.602	0.557	1	1_yellow	cebpd
PLEKHH31	0.00043297	0.105112	0.318	0.23	1	1_yellow	PLEKHH3
bzw1b1	0.000433815	0.249102	0.338	0.274	1	1_yellow	bzw1b
klf11a	0.000443438	0.131991	0.261	0.185	1	1_yellow	klf11a
aldoaa1	0.000448837	0.10645	0.909	0.842	1	1_yellow	aldoaa
slc8a4b1	0.000467279	0.10416	0.401	0.308	1	1_yellow	slc8a4b
foxo1a1	0.000473333	0.156322	0.281	0.201	1	1_yellow	foxo1a
ppp1r15a	0.000503362	0.152882	0.321	0.246	1	1_yellow	ppp1r15a
id1	0.000520906	0.253106	0.574	0.519	1	1_yellow	id1
irf2bpl	0.000540972	0.141844	0.375	0.286	1	1_yellow	irf2bpl
slc35f21	0.000629191	0.11962	0.548	0.443	1	1_yellow	slc35f2
slit21	0.000741733	0.127945	0.543	0.447	1	1_yellow	slit2
greb11	0.000975278	0.136178	0.409	0.324	1	1_yellow	greb1
si:ch73-335l21.4	0.00112617	0.136927	0.568	0.467	1	1_yellow	si:ch73-335l21.4
hpgd1	0.00121522	0.120457	0.205	0.139	1	1_yellow	hpgd
prps1a1	0.00124356	0.142733	0.352	0.282	1	1_yellow	prps1a
atrx1	0.00129868	0.123028	0.682	0.638	1	1_yellow	atrx
irf1b	0.00136909	0.151511	0.284	0.21	1	1_yellow	irf1b
pnrc2	0.00136913	0.112082	0.864	0.837	1	1_yellow	pnrc2
odc11	0.00169583	0.135595	0.324	0.252	1	1_yellow	odc1
her4.31	0.002085	0.101196	0.085	0.045	1	1_yellow	her4.3
zgc:171750	0.00233508	0.148229	0.097	0.054	1	1_yellow	zgc:171750
smad21	0.00248472	0.132833	0.352	0.283	1	1_yellow	smad2
histh1l	0.002755	0.28163	0.528	0.479	1	1_yellow	histh1l
timp2b	0.00285761	0.131256	0.364	0.297	1	1_yellow	timp2b
hnrnpa0b1	0.00318407	0.130692	0.452	0.391	1	1_yellow	hnrnpa0b
slc38a2	0.00371262	0.143165	0.452	0.39	1	1_yellow	slc38a2
p4ha1b1	0.00422489	0.109991	0.17	0.115	1	1_yellow	p4ha1b
foxp41	0.00456871	0.169632	0.435	0.378	1	1_yellow	foxp4
tubb4b	0.00469053	0.131152	0.648	0.61	1	1_yellow	tubb4b
clic2	0.0047981	0.130955	0.125	0.08	1	1_yellow	clic2
hspb111	0.00487942	0.244815	0.068	0.035	1	1_yellow	hspb11
BX284696.11	0.0052204	0.177454	0.327	0.261	1	1_yellow	BX284696.1
ncl1	0.00553703	0.161986	0.48	0.451	1	1_yellow	ncl
npm1a1	0.00577969	0.131231	0.304	0.242	1	1_yellow	npm1a
arf5	0.0057951	0.123627	0.264	0.211	1	1_yellow	arf5
dusp5	0.00599077	0.18648	0.097	0.059	1	1_yellow	dusp5
atp5f1e1	0.00617754	0.136367	0.466	0.418	1	1_yellow	atp5f1e
slc25a25a	0.00702021	0.153663	0.148	0.104	1	1_yellow	slc25a25a
COLEC101	0.00781627	0.121455	0.418	0.358	1	1_yellow	COLEC10
sult6b1	0.00845413	0.126714	0.21	0.158	1	1_yellow	sult6b1
sept9a1	0.00931047	0.117285	0.474	0.416	1	1_yellow	sept9a
marcksl1a	1.4605e-61	0.614018	1	0.886	2.18462e-57	1_green	marcksl1a
pdgfra1	1.97035e-52	0.592417	0.979	0.747	2.94725e-48	1_green	pdgfra
itm2bb	1.50309e-47	0.450734	1	0.945	2.24832e-43	1_green	itm2bb
fxyd6l	4.47835e-44	0.609327	0.951	0.76	6.69872e-40	1_green	fxyd6l
dap1b2	1.87791e-41	0.501823	0.994	0.872	2.80897e-37	1_green	dap1b
sparc	2.50854e-41	0.421353	1	0.995	3.75228e-37	1_green	sparc
ivns1abpa2	6.44522e-41	0.457323	1	0.865	9.64076e-37	1_green	ivns1abpa
SERP11	3.22671e-36	0.387755	1	0.976	4.82651e-32	1_green	SERP1
marcksl1b	8.84541e-36	0.494445	0.991	0.882	1.3231e-31	1_green	marcksl1b
mt-co11	9.11939e-36	0.227017	1	1	1.36408e-31	1_green	mt-co1
cxcl14	9.55608e-34	0.631379	0.783	0.553	1.4294e-29	1_green	cxcl14
aldoaa2	1.84943e-33	0.375294	0.979	0.827	2.76637e-29	1_green	aldoaa
cd74b	2.49436e-33	0.434202	0.994	0.933	3.73107e-29	1_green	cd74b
psap	1.3013e-32	0.460292	0.887	0.755	1.94648e-28	1_green	psap
htra1b	6.88243e-31	0.504122	0.829	0.569	1.02947e-26	1_green	htra1b
alcama	1.98202e-29	0.319689	0.997	0.98	2.9647e-25	1_green	alcama
notch32	2.85844e-29	0.381216	0.994	0.799	4.27565e-25	1_green	notch3
akap12b	7.21427e-29	0.469813	0.899	0.695	1.07911e-24	1_green	akap12b
oaz1a2	2.02846e-28	0.40199	0.976	0.917	3.03417e-24	1_green	oaz1a
selenop1	2.70332e-28	0.366878	0.966	0.885	4.04362e-24	1_green	selenop
hsd17b12	2.63972e-27	0.43864	0.887	0.663	3.94849e-23	1_green	hsd17b1
ponzr11	4.51598e-27	0.307445	0.997	0.966	6.755e-23	1_green	ponzr1
cad1	4.63272e-27	0.478231	0.801	0.602	6.92963e-23	1_green	cad
cd74a	1.05639e-26	0.367829	0.997	0.916	1.58015e-22	1_green	cd74a
rerglb	1.86906e-26	0.412457	0.679	0.386	2.79574e-22	1_green	rerglb
ifi30	9.7321e-24	0.405909	0.893	0.693	1.45573e-19	1_green	ifi30
atp5mc3b2	2.06282e-23	0.332497	0.936	0.878	3.08556e-19	1_green	atp5mc3b
cdh12	7.96921e-23	0.378359	0.908	0.748	1.19204e-18	1_green	cdh1
agrn	7.38649e-22	0.353672	0.872	0.778	1.10487e-17	1_green	agrn
gmps2	8.83584e-21	0.347306	0.856	0.683	1.32167e-16	1_green	gmps
tp53inp1	1.61865e-20	0.460078	0.703	0.478	2.42118e-16	1_green	tp53inp1
plekhg41	9.33441e-19	0.412229	0.612	0.407	1.39624e-14	1_green	plekhg4
mt-co21	1.15614e-18	0.143288	1	0.999	1.72936e-14	1_green	mt-co2
col4a51	1.93099e-18	0.364303	0.865	0.701	2.88837e-14	1_green	col4a5
mt-cyb1	3.72167e-18	0.169378	1	0.995	5.56687e-14	1_green	mt-cyb
pkma1	4.2482e-18	0.360086	0.752	0.626	6.35446e-14	1_green	pkma
gsdf	9.05259e-18	0.315124	1	0.949	1.35409e-13	1_green	gsdf
ackr4b1	4.49636e-17	0.371256	0.657	0.472	6.72566e-13	1_green	ackr4b
col4a61	6.97874e-17	0.357394	0.777	0.675	1.04388e-12	1_green	col4a6
gstt1b1	1.94216e-16	0.326633	0.893	0.776	2.90508e-12	1_green	gstt1b
hspe11	3.97515e-16	0.350208	0.795	0.663	5.94602e-12	1_green	hspe1
slc25a52	4.78262e-16	0.206452	1	0.997	7.15385e-12	1_green	slc25a5
ramp2	1.14893e-15	0.365279	0.498	0.287	1.71858e-11	1_green	ramp2
CU861453.1	3.10719e-15	0.265728	0.339	0.158	4.64774e-11	1_green	CU861453.1
srpra2	4.81946e-15	0.309618	0.801	0.661	7.20895e-11	1_green	srpra
glulb2	2.32838e-14	0.283803	1	0.855	3.4828e-10	1_green	glulb
lama5	2.74146e-14	0.346093	0.774	0.691	4.10068e-10	1_green	lama5
pik3ip12	9.35549e-14	0.428888	0.59	0.44	1.39939e-09	1_green	pik3ip1
bmpr2a	1.09765e-13	0.283575	0.841	0.706	1.64187e-09	1_green	bmpr2a
mbnl3	1.55817e-13	0.347449	0.685	0.575	2.33071e-09	1_green	mbnl3
plpp1a	2.77307e-13	0.33739	0.547	0.355	4.14796e-09	1_green	plpp1a
nrp2a1	2.97099e-13	0.264908	0.657	0.481	4.44401e-09	1_green	nrp2a
slc35f22	1.19965e-12	0.396399	0.596	0.434	1.79444e-08	1_green	slc35f2
htra1a	1.54008e-12	0.281232	0.664	0.49	2.30365e-08	1_green	htra1a
mhc2b	1.85322e-12	0.285759	0.566	0.374	2.77204e-08	1_green	mhc2b
cygb11	3.16112e-12	0.331106	0.459	0.289	4.72841e-08	1_green	cygb1
bambia1	4.45743e-12	0.347672	0.703	0.57	6.66742e-08	1_green	bambia
itga9	5.11706e-12	0.265943	0.495	0.32	7.65409e-08	1_green	itga9
zgc:1748631	5.8803e-12	0.261292	0.902	0.81	8.79575e-08	1_green	zgc:174863
lamb2l	7.01496e-12	0.276816	0.612	0.434	1.0493e-07	1_green	lamb2l
krt18a.1	9.76875e-12	0.209162	0.988	0.969	1.46121e-07	1_green	krt18a.1
myh10	1.05306e-11	0.267546	0.523	0.348	1.57516e-07	1_green	myh10
tent5ba	2.21485e-11	0.329642	0.492	0.312	3.31298e-07	1_green	tent5ba
rtn4a	4.65015e-11	0.349245	0.627	0.546	6.9557e-07	1_green	rtn4a
cd81a	4.67645e-11	0.268755	0.795	0.753	6.99503e-07	1_green	cd81a
appa2	4.70138e-11	0.250135	0.905	0.795	7.03232e-07	1_green	appa
gapdhs1	1.235e-10	0.234835	0.826	0.758	1.84731e-06	1_green	gapdhs
zgc:92275	1.51086e-10	0.294508	0.453	0.296	2.25994e-06	1_green	zgc:92275
smoc2	1.63789e-10	0.248098	0.786	0.674	2.44995e-06	1_green	smoc2
ppl2	2.28166e-10	0.291797	0.514	0.356	3.41291e-06	1_green	ppl
ecm1b2	2.69591e-10	0.240262	0.954	0.845	4.03255e-06	1_green	ecm1b
gabarapb	2.97129e-10	0.209215	0.844	0.811	4.44446e-06	1_green	gabarapb
si:dkey-97a13.6	3.14989e-10	0.213472	0.443	0.275	4.71161e-06	1_green	si:dkey-97a13.6
rps121	3.39816e-10	0.126417	1	0.999	5.08296e-06	1_green	rps12
cd164	5.07396e-10	0.28666	0.468	0.315	7.58963e-06	1_green	cd164
metrn1	5.31328e-10	0.335795	0.56	0.455	7.9476e-06	1_green	metrn
gstm.1	9.44474e-10	0.322977	0.648	0.603	1.41274e-05	1_green	gstm.1
CABZ01068358.1	1.25791e-09	0.264547	0.74	0.659	1.88157e-05	1_green	CABZ01068358.1
hey21	1.25915e-09	0.248675	0.621	0.485	1.88343e-05	1_green	hey2
slc7a10a1	1.6816e-09	0.370429	0.52	0.402	2.51534e-05	1_green	slc7a10a
CABZ01068367.1	2.94603e-09	0.197825	0.538	0.371	4.40667e-05	1_green	CABZ01068367.1
col12a1a	3.19444e-09	0.198789	0.257	0.13	4.77824e-05	1_green	col12a1a
rps13	3.27e-09	0.10615	1	0.998	4.89126e-05	1_green	rps13
rps3a1	3.48252e-09	0.111928	1	0.998	5.20916e-05	1_green	rps3a
rpl191	4.96508e-09	0.107141	1	0.999	7.42676e-05	1_green	rpl19
si:ch73-1a9.3	6.12323e-09	0.163716	0.899	0.873	9.15913e-05	1_green	si:ch73-1a9.3
pgm22	7.24274e-09	0.253903	0.514	0.362	0.000108337	1_green	pgm2
znf536	7.34661e-09	0.22127	0.676	0.521	0.000109891	1_green	znf536
ptprfb2	7.36301e-09	0.264148	0.602	0.477	0.000110136	1_green	ptprfb
cldn11a2	8.12776e-09	0.163813	0.994	0.956	0.000121575	1_green	cldn11a
rps51	8.51094e-09	0.112333	1	0.997	0.000127307	1_green	rps5
rack11	9.81844e-09	0.139545	0.994	0.986	0.000146864	1_green	rack1
dock9b	1.03939e-08	0.198189	0.477	0.317	0.000155473	1_green	dock9b
si:busm1-57f23.11	1.34427e-08	0.311674	0.364	0.218	0.000201076	1_green	si:busm1-57f23.1
rpl18	1.91604e-08	0.115527	1	0.995	0.000286602	1_green	rpl18
ktn1	2.91226e-08	0.186838	0.453	0.303	0.000435616	1_green	ktn1
cldn11b1	3.37362e-08	0.189617	0.489	0.337	0.000504626	1_green	cldn11b
oaz1b2	3.4e-08	0.197831	0.865	0.802	0.000508573	1_green	oaz1b
si:dkey-7j14.6	3.43627e-08	0.183894	0.795	0.773	0.000513998	1_green	si:dkey-7j14.6
si:ch211-240l19.51	3.46732e-08	0.221376	0.413	0.266	0.000518642	1_green	si:ch211-240l19.5
rpl81	3.97984e-08	0.11558	1	0.997	0.000595304	1_green	rpl8
rpl71	4.17204e-08	0.10975	0.997	0.998	0.000624053	1_green	rpl7
faua1	4.19157e-08	0.118867	0.997	0.988	0.000626975	1_green	faua
rpl27	4.67644e-08	0.11163	0.997	0.994	0.000699502	1_green	rpl27
zgc:1948391	5.00517e-08	0.13983	0.318	0.186	0.000748674	1_green	zgc:194839
enpp6	5.09707e-08	0.188549	0.422	0.281	0.000762419	1_green	enpp6
col16a1	5.11627e-08	0.148033	0.336	0.2	0.000765291	1_green	col16a1
slit22	6.87393e-08	0.203984	0.596	0.437	0.0010282	1_green	slit2
foxl2a	6.94065e-08	0.225129	0.48	0.35	0.00103818	1_green	foxl2a
gas6	7.75299e-08	0.310141	0.523	0.421	0.00115969	1_green	gas6
antxr1c1	9.30911e-08	0.299986	0.502	0.409	0.00139246	1_green	antxr1c
ccdc3a1	1.21032e-07	0.188788	0.446	0.307	0.0018104	1_green	ccdc3a
rps31	1.27171e-07	0.135064	0.991	0.982	0.00190222	1_green	rps3
cfl2	1.29506e-07	0.181872	0.502	0.364	0.00193715	1_green	cfl2
kidins220a2	1.84263e-07	0.211355	0.495	0.347	0.0027562	1_green	kidins220a
atrx2	1.93841e-07	0.238176	0.682	0.639	0.00289948	1_green	atrx
slit3	2.58465e-07	0.175676	0.416	0.285	0.00386612	1_green	slit3
lnx2a	2.93536e-07	0.15062	0.281	0.166	0.00439071	1_green	lnx2a
plekha6	3.01327e-07	0.19637	0.52	0.382	0.00450725	1_green	plekha6
rplp11	3.46525e-07	0.109077	1	0.998	0.00518332	1_green	rplp1
ndufa4l1	3.64717e-07	0.185865	0.789	0.784	0.00545544	1_green	ndufa4l
amh	6.56525e-07	0.299765	0.498	0.386	0.0098203	1_green	amh
rps15a	7.41932e-07	0.105813	1	0.999	0.0110978	1_green	rps15a
PDE3B	1.11454e-06	0.167939	0.401	0.28	0.0166714	1_green	PDE3B
fam120a1	1.12133e-06	0.223127	0.517	0.397	0.0167729	1_green	fam120a
arl8ba	1.23733e-06	0.138408	0.333	0.212	0.018508	1_green	arl8ba
slc25a26	1.23765e-06	0.115178	0.284	0.17	0.0185128	1_green	slc25a26
wu:fj16a03	1.29764e-06	0.208109	0.407	0.28	0.0194102	1_green	wu:fj16a03
tmsb1	1.65546e-06	0.167607	0.838	0.777	0.0247624	1_green	tmsb1
pdlim2	2.18814e-06	0.180633	0.272	0.165	0.0327301	1_green	pdlim2
cox4i11	2.43021e-06	0.189697	0.725	0.736	0.0363511	1_green	cox4i1
kank4	2.51103e-06	0.168235	0.404	0.283	0.0375599	1_green	kank4
mt-atp61	2.78269e-06	0.137859	0.988	0.979	0.0416235	1_green	mt-atp6
dag11	3.39179e-06	0.170091	0.823	0.748	0.0507344	1_green	dag1
mmp14a	3.70314e-06	0.155165	0.352	0.237	0.0553915	1_green	mmp14a
atp1a1a.12	3.95917e-06	0.198508	0.817	0.793	0.0592213	1_green	atp1a1a.1
si:dkey-31f5.112	4.84491e-06	0.142286	0.428	0.303	0.0724702	1_green	si:dkey-31f5.11
aif1l	4.91111e-06	0.241627	0.581	0.53	0.0734604	1_green	aif1l
cldn7a2	5.44572e-06	0.262115	0.554	0.463	0.0814571	1_green	cldn7a
si:busm1-266f07.2	6.73402e-06	0.253154	0.538	0.432	0.100727	1_green	si:busm1-266f07.2
grna	7.1575e-06	0.169025	0.407	0.291	0.107062	1_green	grna
rftn2	9.68083e-06	0.150788	0.388	0.274	0.144806	1_green	rftn2
itm2ba	1.02634e-05	0.175074	0.777	0.782	0.15352	1_green	itm2ba
wu:fc75a09	1.02731e-05	0.212097	0.407	0.309	0.153665	1_green	wu:fc75a09
nid1a	1.06616e-05	0.136343	0.251	0.153	0.159476	1_green	nid1a
ogdha	1.06617e-05	0.132003	0.297	0.192	0.159478	1_green	ogdha
pyroxd2	1.12131e-05	0.117443	0.346	0.229	0.167726	1_green	pyroxd2
eif4ebp3l1	1.26427e-05	0.25224	0.443	0.361	0.189109	1_green	eif4ebp3l
gpt2l	1.28193e-05	0.133944	0.257	0.161	0.191752	1_green	gpt2l
zgc:103700	1.32644e-05	0.195492	0.612	0.527	0.198409	1_green	zgc:103700
hipk3a	1.39974e-05	0.125205	0.373	0.262	0.209374	1_green	hipk3a
lamc1	1.66643e-05	0.1015	0.226	0.134	0.249265	1_green	lamc1
enc1	1.83495e-05	0.211499	0.523	0.446	0.274472	1_green	enc1
rpl35a	2.87559e-05	0.103105	0.994	0.992	0.430131	1_green	rpl35a
slc38a42	4.69242e-05	0.162441	0.456	0.345	0.701893	1_green	slc38a4
si:ch211-250c4.4	5.95608e-05	0.157857	0.459	0.365	0.890911	1_green	si:ch211-250c4.4
fuca2	6.891e-05	0.134661	0.242	0.156	1	1_green	fuca2
slc25a3b1	7.09914e-05	0.186882	0.648	0.646	1	1_green	slc25a3b
spcs2	7.11755e-05	0.133159	0.309	0.213	1	1_green	spcs2
si:ch73-158p21.3	7.19573e-05	0.126306	0.367	0.264	1	1_green	si:ch73-158p21.3
robo1	7.35841e-05	0.145315	0.443	0.35	1	1_green	robo1
znf609b	8.26713e-05	0.154574	0.517	0.428	1	1_green	znf609b
atp5fa12	8.41291e-05	0.172121	0.67	0.642	1	1_green	atp5fa1
edem1	8.88725e-05	0.165393	0.379	0.283	1	1_green	edem1
aqp12	9.44279e-05	0.131035	0.333	0.234	1	1_green	aqp12
rapgef2	9.53524e-05	0.151377	0.373	0.275	1	1_green	rapgef2
foxo3b	9.64154e-05	0.104662	0.281	0.188	1	1_green	foxo3b
pam	0.000118009	0.154384	0.373	0.28	1	1_green	pam
il11ra1	0.000128006	0.11198	0.382	0.282	1	1_green	il11ra
ampd2b2	0.000128149	0.141388	0.446	0.344	1	1_green	ampd2b
gmpr21	0.000153991	0.20601	0.391	0.312	1	1_green	gmpr2
slc38a3b1	0.000234972	0.113067	0.284	0.196	1	1_green	slc38a3b
myl9a1	0.00026082	0.14895	0.725	0.71	1	1_green	myl9a
msna	0.000262417	0.177417	0.691	0.691	1	1_green	msna
timp2b1	0.000274103	0.106164	0.394	0.291	1	1_green	timp2b
sec62	0.000284103	0.106906	0.324	0.235	1	1_green	sec62
slc43a3b	0.000290173	0.204749	0.526	0.494	1	1_green	slc43a3b
nos1apa.1	0.000304973	0.145356	0.434	0.341	1	1_green	nos1apa.1
slc27a1a	0.000331125	0.138156	0.315	0.23	1	1_green	slc27a1a
rhebl1	0.000371994	0.111068	0.208	0.135	1	1_green	rhebl1
naprt1	0.000385466	0.111364	0.361	0.27	1	1_green	naprt
si:dkey-74k8.3	0.000401131	0.112796	0.318	0.229	1	1_green	si:dkey-74k8.3
si:busm1-194e12.11	0.000414831	0.141559	0.486	0.388	1	1_green	si:busm1-194e12.11
fam13b	0.000503994	0.109196	0.321	0.237	1	1_green	fam13b
ppp1cb	0.000514112	0.208881	0.428	0.381	1	1_green	ppp1cb
tln1	0.000574807	0.184135	0.453	0.4	1	1_green	tln1
cnbpa1	0.00059851	0.190338	0.416	0.359	1	1_green	cnbpa
bckdk1	0.000603953	0.191621	0.269	0.201	1	1_green	bckdk
ccser2a2	0.000610103	0.110657	0.401	0.309	1	1_green	ccser2a
lgals3b	0.000646357	0.23477	0.468	0.45	1	1_green	lgals3b
lpar1	0.000666142	0.104139	0.281	0.201	1	1_green	lpar1
rhoq	0.00073138	0.134513	0.367	0.285	1	1_green	rhoq
fam120c	0.000773063	0.1896	0.422	0.364	1	1_green	fam120c
mt-nd11	0.000810026	0.147872	0.786	0.788	1	1_green	mt-nd1
svild	0.000818282	0.178735	0.364	0.298	1	1_green	svild
jcada	0.000822397	0.142136	0.388	0.311	1	1_green	jcada
lygl1	0.000831747	0.120301	0.196	0.131	1	1_green	lygl1
COLEC102	0.000917179	0.175505	0.431	0.356	1	1_green	COLEC10
sema3ab	0.000924209	0.102455	0.266	0.189	1	1_green	sema3ab
calua	0.000930477	0.127199	0.37	0.283	1	1_green	calua
notch1b1	0.00101874	0.125048	0.382	0.298	1	1_green	notch1b
ano5b1	0.00117212	0.128229	0.385	0.295	1	1_green	ano5b
tcf3b	0.00129693	0.110297	0.346	0.269	1	1_green	tcf3b
zgc:162698	0.00137968	0.100207	0.202	0.137	1	1_green	zgc:162698
hmgn31	0.00138331	0.134103	0.41	0.326	1	1_green	hmgn3
mkrn1	0.00144093	0.129419	0.339	0.263	1	1_green	mkrn1
slc38a5b2	0.00151566	0.158954	0.468	0.419	1	1_green	slc38a5b
ctsa	0.00177515	0.185259	0.358	0.308	1	1_green	ctsa
tspan4a	0.00244687	0.149888	0.358	0.29	1	1_green	tspan4a
sult1st6	0.00250369	0.12128	0.251	0.184	1	1_green	sult1st6
eif4ebp31	0.00264906	0.19936	0.312	0.258	1	1_green	eif4ebp3
cx43	0.00269226	0.214371	0.407	0.355	1	1_green	cx43
ptp4a2b2	0.00279572	0.190339	0.41	0.366	1	1_green	ptp4a2b
CR792441.1	0.00283985	0.183184	0.061	0.029	1	1_green	CR792441.1
mrpl361	0.00305648	0.156298	0.214	0.157	1	1_green	mrpl36
cnn3a	0.00312146	0.162009	0.208	0.152	1	1_green	cnn3a
ppib	0.00318388	0.115852	0.722	0.736	1	1_green	ppib
nop10	0.00343313	0.203941	0.226	0.175	1	1_green	nop10
selenof	0.00346473	0.181381	0.517	0.528	1	1_green	selenof
cnbpb	0.00363898	0.191774	0.492	0.507	1	1_green	cnbpb
vegfaa1	0.00385527	0.125767	0.434	0.359	1	1_green	vegfaa
rps6ka1	0.00395509	0.127721	0.284	0.222	1	1_green	rps6ka1
crtap	0.00448109	0.104165	0.373	0.305	1	1_green	crtap
atp1b3b	0.00505891	0.19442	0.33	0.285	1	1_green	atp1b3b
bmp4	0.00509441	0.106585	0.269	0.207	1	1_green	bmp4
atp5f1b2	0.00564839	0.156787	0.633	0.642	1	1_green	atp5f1b
selenow1	0.00592562	0.130445	0.578	0.587	1	1_green	selenow1
capn2a	0.0060175	0.115569	0.385	0.319	1	1_green	capn2a
tmem176l.1	0.00626592	0.169091	0.587	0.621	1	1_green	tmem176l.1
map7d1a	0.00656106	0.101249	0.33	0.265	1	1_green	map7d1a
sept9a2	0.0068899	0.180083	0.45	0.423	1	1_green	sept9a
atp5pb1	0.00785332	0.159152	0.529	0.536	1	1_green	atp5pb
vdac21	0.00786085	0.160146	0.514	0.518	1	1_green	vdac2
aldh1a21	0.00820746	0.14363	0.615	0.626	1	1_green	aldh1a2
adamts2	0.00869412	0.12397	0.385	0.328	1	1_green	adamts2
atp5if1b1	0.00869804	0.167103	0.388	0.362	1	1_green	atp5if1b
cbx3a	0.00908851	0.171575	0.364	0.327	1	1_green	cbx3a
ndrg3b	0.00944098	0.1334	0.18	0.133	1	1_green	ndrg3b
h3f3b.1.11	0.00954649	0.107908	0.679	0.7	1	1_green	h3f3b.1.1
sparc1	1.73125e-69	0.584625	1	0.995	2.5896e-65	1_teal	sparc
cd74b1	3.36307e-64	0.598582	1	0.933	5.03049e-60	1_teal	cd74b
cd74a1	1.58882e-59	0.558666	0.997	0.918	2.37656e-55	1_teal	cd74a
gsdf1	6.90917e-54	0.665817	0.997	0.951	1.03347e-49	1_teal	gsdf
marcksl1a1	8.1233e-53	0.536206	1	0.888	1.21508e-48	1_teal	marcksl1a
itm2bb1	1.70296e-45	0.440318	1	0.946	2.54729e-41	1_teal	itm2bb
ifi301	1.89606e-45	0.627049	0.937	0.687	2.83613e-41	1_teal	ifi30
tent5ba1	1.91031e-34	0.484285	0.631	0.287	2.85743e-30	1_teal	tent5ba
akap12b1	3.43773e-33	0.485363	0.91	0.696	5.14215e-29	1_teal	akap12b
htra1a1	7.92782e-29	0.392436	0.777	0.47	1.18584e-24	1_teal	htra1a
plpp1a1	2.34841e-28	0.523999	0.635	0.341	3.51275e-24	1_teal	plpp1a
gas61	8.24072e-28	0.479311	0.674	0.392	1.23265e-23	1_teal	gas6
marcksl1b1	1.3156e-26	0.450597	0.98	0.886	1.96788e-22	1_teal	marcksl1b
fxyd6l1	9.35796e-24	0.446319	0.934	0.767	1.39976e-19	1_teal	fxyd6l
hsp70.21	8.094e-23	0.400506	0.973	0.904	1.2107e-18	1_teal	hsp70.2
hsp70.11	1.26474e-21	0.398611	0.96	0.891	1.8918e-17	1_teal	hsp70.1
pros1	8.5523e-21	0.360596	0.339	0.13	1.27925e-16	1_teal	pros1
rerglb1	3.45351e-20	0.320134	0.671	0.393	5.16576e-16	1_teal	rerglb
tp53inp11	3.64367e-20	0.418247	0.728	0.477	5.4502e-16	1_teal	tp53inp1
krt18a.11	1.2542e-19	0.272772	0.99	0.969	1.87604e-15	1_teal	krt18a.1
znf609b1	2.58033e-19	0.308008	0.654	0.402	3.85966e-15	1_teal	znf609b
ivns1abpa3	2.17425e-18	0.302414	0.99	0.869	3.25224e-14	1_teal	ivns1abpa
robo3	5.94916e-18	0.167533	0.223	0.066	8.89876e-14	1_teal	robo3
cxcl141	6.92118e-18	0.393604	0.771	0.559	1.03527e-13	1_teal	cxcl14
htra1b1	8.91367e-18	0.337201	0.811	0.577	1.33331e-13	1_teal	htra1b
clu	1.23245e-17	0.254101	0.329	0.131	1.8435e-13	1_teal	clu
psap1	1.99483e-17	0.299948	0.884	0.758	2.98386e-13	1_teal	psap
ccbe1	3.48819e-17	0.243919	0.352	0.153	5.21763e-13	1_teal	ccbe1
alcama1	4.55992e-17	0.233486	1	0.98	6.82073e-13	1_teal	alcama
aldoaa3	8.7541e-17	0.306021	0.957	0.834	1.30944e-12	1_teal	aldoaa
slit31	1.10283e-16	0.233981	0.515	0.267	1.64961e-12	1_teal	slit3
hey22	7.70536e-16	0.347827	0.708	0.47	1.15257e-11	1_teal	hey2
id32	1.86999e-15	0.428919	0.668	0.451	2.79713e-11	1_teal	id3
ecrg4a	8.142e-15	0.325511	0.425	0.216	1.21788e-10	1_teal	ecrg4a
amotl2b1	9.95134e-15	0.512169	0.429	0.244	1.48852e-10	1_teal	amotl2b
grna1	1.41765e-14	0.241456	0.495	0.275	2.12052e-10	1_teal	grna
UBB1	1.85699e-14	0.457227	0.718	0.559	2.77769e-10	1_teal	UBB
hsp70.31	2.23952e-14	0.336839	0.95	0.876	3.34987e-10	1_teal	hsp70.3
cfl21	2.80476e-14	0.259211	0.565	0.354	4.19536e-10	1_teal	cfl2
pdgfra2	5.81071e-14	0.269382	0.953	0.756	8.69166e-10	1_teal	pdgfra
mhc2b1	3.2432e-13	0.301799	0.591	0.372	4.85117e-09	1_teal	mhc2b
si:busm1-194e12.111	5.53425e-13	0.21897	0.601	0.367	8.27813e-09	1_teal	si:busm1-194e12.11
znf5361	7.39996e-13	0.259869	0.724	0.514	1.10689e-08	1_teal	znf536
lamb2l1	9.63968e-13	0.232927	0.631	0.434	1.4419e-08	1_teal	lamb2l
hspe12	3.4693e-12	0.30668	0.791	0.667	5.18937e-08	1_teal	hspe1
phlda22	3.64492e-12	0.295598	0.93	0.796	5.45207e-08	1_teal	phlda2
zgc:922751	3.99385e-12	0.248256	0.495	0.291	5.974e-08	1_teal	zgc:92275
pkma2	1.69639e-11	0.25905	0.791	0.621	2.53746e-07	1_teal	pkma
foxl2a1	2.10946e-11	0.221748	0.525	0.343	3.15534e-07	1_teal	foxl2a
hsp70l1	2.44437e-11	0.398019	0.794	0.648	3.65629e-07	1_teal	hsp70l
wnt4a2	3.08438e-11	0.275603	0.601	0.414	4.61362e-07	1_teal	wnt4a
gstt1b2	6.43287e-11	0.234556	0.904	0.776	9.62229e-07	1_teal	gstt1b
socs3a1	6.86688e-11	0.250221	0.983	0.919	1.02715e-06	1_teal	socs3a
nrg2a	8.73158e-11	0.178119	0.319	0.164	1.30607e-06	1_teal	nrg2a
gmnn2	8.96757e-11	0.31903	0.701	0.55	1.34137e-06	1_teal	gmnn
CABZ01068358.11	9.44981e-11	0.250395	0.804	0.648	1.4135e-06	1_teal	CABZ01068358.1
col4a62	9.75822e-11	0.234762	0.824	0.667	1.45964e-06	1_teal	col4a6
bambia2	1.18535e-10	0.292297	0.734	0.566	1.77304e-06	1_teal	bambia
col4a52	2.75526e-10	0.234708	0.831	0.711	4.12132e-06	1_teal	col4a5
tcf3b1	2.87075e-10	0.187485	0.425	0.254	4.29407e-06	1_teal	tcf3b
klf6a1	2.97513e-10	0.278598	0.907	0.818	4.4502e-06	1_teal	klf6a
lama51	4.34453e-10	0.259194	0.761	0.695	6.49855e-06	1_teal	lama5
cnnm2b	5.03135e-10	0.141625	0.282	0.135	7.52589e-06	1_teal	cnnm2b
oaz1a3	5.04228e-10	0.234503	0.973	0.919	7.54224e-06	1_teal	oaz1a
ptgs2a	5.48579e-10	0.288968	0.365	0.205	8.20564e-06	1_teal	ptgs2a
si:busm1-266f07.21	5.63312e-10	0.422123	0.581	0.426	8.42602e-06	1_teal	si:busm1-266f07.2
slc4a2a	7.30944e-10	0.152567	0.312	0.162	1.09335e-05	1_teal	slc4a2a
vegfaa2	8.2531e-10	0.197486	0.518	0.343	1.2345e-05	1_teal	vegfaa
ctsba	8.25541e-10	0.394873	0.379	0.231	1.23484e-05	1_teal	ctsba
si:dkey-73n10.12	8.94869e-10	0.284739	0.525	0.359	1.33855e-05	1_teal	si:dkey-73n10.1
fkbp1b	1.15643e-09	0.189347	0.635	0.445	1.72979e-05	1_teal	fkbp1b
si:ch73-1a9.31	1.17395e-09	0.168276	0.924	0.868	1.75599e-05	1_teal	si:ch73-1a9.3
rhoq1	1.57586e-09	0.165524	0.445	0.271	2.35717e-05	1_teal	rhoq
eif4ebp3l2	1.92747e-09	0.262559	0.518	0.347	2.88311e-05	1_teal	eif4ebp3l
slc38a21	2.06548e-09	0.27273	0.528	0.377	3.08955e-05	1_teal	slc38a2
nccrp1	2.49585e-09	0.366528	0.422	0.279	3.73329e-05	1_teal	nccrp1
cebpb1	2.51317e-09	0.352488	0.678	0.529	3.7592e-05	1_teal	cebpb
si:ch73-158p21.31	2.59334e-09	0.189432	0.422	0.255	3.87912e-05	1_teal	si:ch73-158p21.3
junba1	2.63976e-09	0.214518	0.967	0.873	3.94856e-05	1_teal	junba
gadd45ba1	3.89683e-09	0.205214	0.944	0.866	5.82888e-05	1_teal	gadd45ba
slc7a10a2	4.66004e-09	0.224192	0.581	0.392	6.97049e-05	1_teal	slc7a10a
chka	4.86358e-09	0.244016	0.771	0.663	7.27494e-05	1_teal	chka
dpp7	5.17802e-09	0.176121	0.458	0.291	7.74528e-05	1_teal	dpp7
zgc:1037001	7.23409e-09	0.287595	0.664	0.518	0.000108207	1_teal	zgc:103700
pim11	8.29184e-09	0.295519	0.744	0.623	0.000124029	1_teal	pim1
sb:cb811	9.16346e-09	0.243789	0.518	0.348	0.000137067	1_teal	sb:cb81
foxo3b1	9.52153e-09	0.148275	0.326	0.181	0.000142423	1_teal	foxo3b
amotl2a	9.9276e-09	0.289342	0.415	0.275	0.000148497	1_teal	amotl2a
ptn	1.11456e-08	0.176704	0.246	0.123	0.000166716	1_teal	ptn
nrp2a2	1.17797e-08	0.172733	0.664	0.483	0.000176201	1_teal	nrp2a
ackr4b2	1.29053e-08	0.24442	0.645	0.478	0.000193037	1_teal	ackr4b
enpp61	1.59658e-08	0.167022	0.445	0.279	0.000238816	1_teal	enpp6
c7a	1.64842e-08	0.134723	0.186	0.081	0.00024657	1_teal	c7a
pabpc1b	1.91053e-08	0.257134	0.565	0.427	0.000285776	1_teal	pabpc1b
aqp121	2.04268e-08	0.180498	0.375	0.227	0.000305544	1_teal	aqp12
plekha61	2.04434e-08	0.188169	0.535	0.381	0.000305792	1_teal	plekha6
bag31	2.20877e-08	0.231505	0.279	0.15	0.000330387	1_teal	bag3
cd81a1	2.48913e-08	0.205944	0.807	0.752	0.000372323	1_teal	cd81a
asph	2.61357e-08	0.121031	0.276	0.144	0.000390938	1_teal	asph
CABZ01049847.1	3.59678e-08	0.115227	0.15	0.059	0.000538007	1_teal	CABZ01049847.1
atp1b1a	3.77528e-08	0.168847	0.997	0.982	0.000564707	1_teal	atp1b1a
emilin2b	3.78797e-08	0.134458	0.233	0.114	0.000566604	1_teal	emilin2b
sync	5.26061e-08	0.101201	0.233	0.114	0.000786883	1_teal	sync
myh101	1.00757e-07	0.206571	0.502	0.355	0.00150712	1_teal	myh10
si:dkeyp-72g9.4	2.02447e-07	0.125594	0.209	0.104	0.0030282	1_teal	si:dkeyp-72g9.4
hdac4	2.19027e-07	0.136088	0.289	0.166	0.00327621	1_teal	hdac4
mycb2	2.43785e-07	0.195087	0.907	0.795	0.00364654	1_teal	mycb
reep5	2.51529e-07	0.235614	0.542	0.42	0.00376237	1_teal	reep5
tgm2b	2.5315e-07	0.104108	0.136	0.055	0.00378661	1_teal	tgm2b
cebpd1	2.6071e-07	0.292739	0.674	0.544	0.0038997	1_teal	cebpd
si:ch211-137i24.10	2.75582e-07	0.232807	0.508	0.355	0.00412216	1_teal	si:ch211-137i24.10
2020-06-01	3.08233e-07	0.180218	1	0.937	0.00461055	1_teal	jun
entpd1	4.23445e-07	0.14646	0.223	0.116	0.00633388	1_teal	entpd1
egr31	4.82202e-07	0.168041	0.252	0.138	0.00721278	1_teal	egr3
ppp1cb1	5.07932e-07	0.188168	0.505	0.367	0.00759765	1_teal	ppp1cb
arrdc2	5.66383e-07	0.22863	0.252	0.141	0.00847195	1_teal	arrdc2
ppp1r14bb	5.9514e-07	0.206123	0.412	0.281	0.0089021	1_teal	ppp1r14bb
npc2	6.2868e-07	0.235146	0.495	0.369	0.00940379	1_teal	npc2
vat1	6.87181e-07	0.222357	0.465	0.342	0.0102788	1_teal	vat1
pcdh10a	7.87531e-07	0.129197	0.259	0.146	0.0117799	1_teal	pcdh10a
il15	7.87796e-07	0.21111	0.203	0.106	0.0117838	1_teal	il15
cldn11b2	8.15154e-07	0.159492	0.485	0.34	0.0121931	1_teal	cldn11b
mbnl31	9.08845e-07	0.212788	0.694	0.575	0.0135945	1_teal	mbnl3
si:dkey-16l2.20	1.04414e-06	0.203239	0.422	0.293	0.0156183	1_teal	si:dkey-16l2.20
smoc21	1.10592e-06	0.165282	0.787	0.675	0.0165423	1_teal	smoc2
col4a3bpa	1.21072e-06	0.120465	0.269	0.155	0.01811	1_teal	col4a3bpa
smarca2	1.28037e-06	0.141106	0.349	0.219	0.0191518	1_teal	smarca2
phldb2b	1.4943e-06	0.138313	0.296	0.178	0.0223517	1_teal	phldb2b
gstm.11	1.5299e-06	0.214794	0.674	0.599	0.0228842	1_teal	gstm.1
tspan4a1	1.81956e-06	0.195049	0.399	0.283	0.027217	1_teal	tspan4a
plekhg42	2.2036e-06	0.181948	0.565	0.42	0.0329614	1_teal	plekhg4
il15ra	2.51167e-06	0.107017	0.259	0.147	0.0375695	1_teal	il15ra
aif1l1	2.65395e-06	0.195415	0.635	0.52	0.0396979	1_teal	aif1l
si:dkey-7j14.61	2.70802e-06	0.165516	0.807	0.771	0.0405066	1_teal	si:dkey-7j14.6
trpm6	3.02585e-06	0.137771	0.243	0.139	0.0452606	1_teal	trpm6
fosab1	3.24107e-06	0.160444	1	0.943	0.0484799	1_teal	fosab
b2m	3.40715e-06	0.197717	0.99	0.989	0.0509641	1_teal	b2m
rtn4a1	3.53525e-06	0.219402	0.635	0.546	0.0528803	1_teal	rtn4a
hmgn32	4.24823e-06	0.137916	0.455	0.318	0.063545	1_teal	hmgn3
klf11a1	4.31759e-06	0.122717	0.296	0.18	0.0645825	1_teal	klf11a
btg21	5.87794e-06	0.152974	0.99	0.912	0.0879222	1_teal	btg2
ptmaa	6.0747e-06	0.182861	0.831	0.755	0.0908653	1_teal	ptmaa
mycn	6.69493e-06	0.15976	0.415	0.278	0.100143	1_teal	mycn
tjp1a	6.75388e-06	0.158758	0.515	0.389	0.101025	1_teal	tjp1a
edem11	8.25134e-06	0.139475	0.409	0.279	0.123423	1_teal	edem1
dnmt3bb.1	8.49978e-06	0.108741	0.296	0.183	0.12714	1_teal	dnmt3bb.1
fkbp14	8.95102e-06	0.110642	0.272	0.166	0.133889	1_teal	fkbp14
bmpr2a1	9.14307e-06	0.157481	0.794	0.718	0.136762	1_teal	bmpr2a
sult1st61	1.00125e-05	0.134526	0.286	0.178	0.149767	1_teal	sult1st6
fndc3ba	1.24888e-05	0.137613	0.432	0.305	0.186808	1_teal	fndc3ba
cnn3a1	1.26232e-05	0.160776	0.246	0.145	0.188818	1_teal	cnn3a
ktn11	1.31495e-05	0.152553	0.435	0.309	0.196691	1_teal	ktn1
slc43a3b1	1.37013e-05	0.229335	0.571	0.486	0.204945	1_teal	slc43a3b
metrn2	1.51702e-05	0.153926	0.591	0.451	0.226916	1_teal	metrn
actb11	1.73294e-05	0.169757	0.92	0.87	0.259214	1_teal	actb1
tmem176l.11	1.83192e-05	0.19609	0.681	0.602	0.274018	1_teal	tmem176l.1
pdlim21	1.95758e-05	0.164273	0.266	0.168	0.292815	1_teal	pdlim2
nos1apa.11	2.39697e-05	0.128202	0.455	0.338	0.358538	1_teal	nos1apa.1
zgc:1748632	2.41431e-05	0.137183	0.904	0.812	0.361133	1_teal	zgc:174863
ccdc80	2.49464e-05	0.157916	0.332	0.228	0.373148	1_teal	ccdc80
si:ch211-79k12.1	2.55288e-05	0.13717	0.419	0.297	0.381859	1_teal	si:ch211-79k12.1
cav2	2.66749e-05	0.155457	0.415	0.302	0.399004	1_teal	cav2
ubb1	2.77903e-05	0.264104	0.734	0.645	0.415688	1_teal	ubb
aldob	3.0588e-05	0.264081	0.419	0.31	0.457536	1_teal	aldob
cd1641	3.09578e-05	0.170147	0.435	0.325	0.463068	1_teal	cd164
tpm4a	3.32422e-05	0.194762	0.664	0.605	0.497237	1_teal	tpm4a
gmps3	3.33207e-05	0.135666	0.831	0.691	0.498411	1_teal	gmps
creb3l3l	3.34726e-05	0.162857	0.488	0.38	0.500683	1_teal	creb3l3l
plk2b1	3.53421e-05	0.103987	0.223	0.131	0.528647	1_teal	plk2b
map7d1a1	3.75032e-05	0.120821	0.369	0.259	0.560973	1_teal	map7d1a
srpra3	3.89793e-05	0.156676	0.784	0.667	0.583053	1_teal	srpra
pim22	3.94624e-05	0.222022	0.485	0.383	0.590279	1_teal	pim2
mhc2dab	3.97626e-05	0.170098	0.336	0.225	0.594769	1_teal	mhc2dab
anxa2a	4.03215e-05	0.269751	0.561	0.457	0.603129	1_teal	anxa2a
hs3st3b1b	4.10837e-05	0.176807	0.449	0.339	0.61453	1_teal	hs3st3b1b
f10	4.202e-05	0.157396	0.455	0.341	0.628536	1_teal	f10
parp12a	4.25964e-05	0.121842	0.279	0.182	0.637158	1_teal	parp12a
sept9a3	4.92742e-05	0.185261	0.518	0.409	0.737044	1_teal	sept9a
srpk1a	4.99589e-05	0.116646	0.415	0.303	0.747284	1_teal	srpk1a
wu:fj16a031	5.05209e-05	0.147787	0.399	0.284	0.755691	1_teal	wu:fj16a03
myl9a2	5.22987e-05	0.140011	0.757	0.704	0.782284	1_teal	myl9a
emp2	5.46265e-05	0.120604	0.462	0.346	0.817104	1_teal	emp2
si:busm1-57f23.12	5.59525e-05	0.179671	0.332	0.226	0.836938	1_teal	si:busm1-57f23.1
itga5	5.78311e-05	0.126619	0.409	0.299	0.865037	1_teal	itga5
tagln2	5.98963e-05	0.258514	0.475	0.4	0.89593	1_teal	tagln2
pnp5a2	6.46638e-05	0.17595	0.571	0.458	0.967241	1_teal	pnp5a
robo11	6.60996e-05	0.125129	0.472	0.346	0.988718	1_teal	robo1
ponzr12	6.67722e-05	0.120585	0.99	0.968	0.998779	1_teal	ponzr1
ppp1r9alb	6.73147e-05	0.130978	0.379	0.274	1	1_teal	ppp1r9alb
slc35f23	6.97642e-05	0.178645	0.565	0.444	1	1_teal	slc35f2
tjap1	7.60774e-05	0.116344	0.282	0.189	1	1_teal	tjap1
svild1	7.91921e-05	0.192006	0.392	0.293	1	1_teal	svild
emx2	8.80878e-05	0.17367	0.691	0.638	1	1_teal	emx2
wbp2nl	8.96289e-05	0.185495	0.362	0.267	1	1_teal	wbp2nl
notch33	9.2396e-05	0.142555	0.953	0.811	1	1_teal	notch3
zgc:114200	9.52659e-05	0.156475	0.302	0.205	1	1_teal	zgc:114200
ampd2b3	9.63068e-05	0.103808	0.468	0.341	1	1_teal	ampd2b
pbxip1a	0.000100063	0.101934	0.292	0.194	1	1_teal	pbxip1a
ppp1r15a1	0.000104129	0.132326	0.352	0.242	1	1_teal	ppp1r15a
rftn21	0.000111763	0.103606	0.389	0.276	1	1_teal	rftn2
cnn2	0.000116179	0.242515	0.468	0.382	1	1_teal	cnn2
adma	0.000117505	0.13322	0.07	0.026	1	1_teal	adma
cx431	0.000133854	0.178841	0.449	0.347	1	1_teal	cx43
slc43a2b	0.000135471	0.103676	0.219	0.135	1	1_teal	slc43a2b
fosb1	0.000145968	0.106914	0.944	0.819	1	1_teal	fosb
kpna4	0.00017014	0.132252	0.213	0.133	1	1_teal	kpna4
msna1	0.000178192	0.145556	0.731	0.683	1	1_teal	msna
coq10b	0.000193096	0.108741	0.286	0.192	1	1_teal	coq10b
adamts21	0.000202827	0.111181	0.429	0.32	1	1_teal	adamts2
hsp90aa1.21	0.000209167	0.212183	0.721	0.625	1	1_teal	hsp90aa1.2
CABZ01068367.11	0.000235309	0.112689	0.498	0.382	1	1_teal	CABZ01068367.1
etnk1	0.000239446	0.109119	0.389	0.282	1	1_teal	etnk1
dnajb1b1	0.000256555	0.158689	0.764	0.658	1	1_teal	dnajb1b
capn2a1	0.000262158	0.101861	0.425	0.312	1	1_teal	capn2a
BX284696.12	0.000271373	0.254413	0.352	0.258	1	1_teal	BX284696.1
si:ch211-178n15.1	0.000280365	0.104193	0.302	0.208	1	1_teal	si:ch211-178n15.1
tln11	0.000289396	0.15535	0.488	0.394	1	1_teal	tln1
jdp2b1	0.000305154	0.13063	0.92	0.816	1	1_teal	jdp2b
ccn1	0.000331883	0.236055	0.359	0.262	1	1_teal	ccn1
lxn	0.00038103	0.137933	0.279	0.194	1	1_teal	lxn
bcam	0.000436618	0.102524	0.887	0.822	1	1_teal	bcam
si:ch211-250c4.41	0.000453969	0.11714	0.468	0.365	1	1_teal	si:ch211-250c4.4
capza1b	0.000478784	0.166317	0.282	0.206	1	1_teal	capza1b
ctdspla	0.000486106	0.11123	0.296	0.206	1	1_teal	ctdspla
agrn1	0.000513779	0.120897	0.837	0.787	1	1_teal	agrn
nrarpa2	0.000536194	0.140591	0.728	0.617	1	1_teal	nrarpa
cox4i2	0.000601753	0.16697	0.488	0.405	1	1_teal	cox4i2
amh1	0.0006207	0.142498	0.488	0.39	1	1_teal	amh
hsd3b7	0.000632399	0.132644	0.173	0.106	1	1_teal	hsd3b7
myl12.1	0.000692975	0.136124	0.787	0.739	1	1_teal	myl12.1
mt2	0.000809818	0.324592	0.173	0.107	1	1_teal	mt2
rhoab1	0.000859609	0.202586	0.372	0.295	1	1_teal	rhoab
rnf19a	0.000879819	0.143956	0.302	0.222	1	1_teal	rnf19a
sdc41	0.000920056	0.163567	0.698	0.633	1	1_teal	sdc4
mcl1a1	0.000953972	0.136787	0.847	0.76	1	1_teal	mcl1a
zbtb16a	0.00101847	0.11837	0.266	0.188	1	1_teal	zbtb16a
id2b	0.0010223	0.226263	0.249	0.17	1	1_teal	id2b
ctsd	0.00121594	0.163512	0.355	0.275	1	1_teal	ctsd
tead1b	0.00123081	0.120186	0.452	0.36	1	1_teal	tead1b
tob1b1	0.00126317	0.18178	0.611	0.566	1	1_teal	tob1b
tuba8l4	0.0014158	0.19851	0.555	0.496	1	1_teal	tuba8l4
si:ch73-189n23.1	0.00144448	0.162606	0.06	0.025	1	1_teal	si:ch73-189n23.1
ier2a1	0.00144528	0.171554	0.754	0.693	1	1_teal	ier2a
ubc1	0.00151764	0.12367	0.754	0.703	1	1_teal	ubc
si:dkey-74k8.31	0.0015515	0.100787	0.316	0.231	1	1_teal	si:dkey-74k8.3
selenow11	0.00196483	0.15282	0.641	0.574	1	1_teal	selenow1
cyb5a	0.00199663	0.147098	0.136	0.083	1	1_teal	cyb5a
fam120a2	0.00200756	0.110042	0.502	0.402	1	1_teal	fam120a
ywhaz	0.00201327	0.113533	0.761	0.733	1	1_teal	ywhaz
sod1	0.00201962	0.165538	0.442	0.375	1	1_teal	sod1
fabp3	0.00208669	0.139024	0.186	0.124	1	1_teal	fabp3
dag12	0.0021913	0.134175	0.774	0.76	1	1_teal	dag1
klf3	0.00229173	0.1003	0.272	0.198	1	1_teal	klf3
gabarapb1	0.00232429	0.101011	0.801	0.82	1	1_teal	gabarapb
si:ch211-195b13.1	0.00237947	0.125823	0.133	0.08	1	1_teal	si:ch211-195b13.1
ctsa1	0.00245264	0.139497	0.385	0.303	1	1_teal	ctsa
tubb4b1	0.00247449	0.152363	0.654	0.61	1	1_teal	tubb4b
nhsl21	0.00254235	0.132673	0.435	0.356	1	1_teal	nhsl2
gapdhs2	0.00257771	0.116891	0.784	0.768	1	1_teal	gapdhs
tjp2b	0.0027158	0.1277	0.246	0.18	1	1_teal	tjp2b
si:ch73-141c7.1	0.00272642	0.118769	0.236	0.17	1	1_teal	si:ch73-141c7.1
tspan36	0.0027318	0.116184	0.183	0.12	1	1_teal	tspan36
fthl27	0.00274065	0.103217	0.92	0.872	1	1_teal	fthl27
pmp22a	0.00290641	0.148291	0.349	0.276	1	1_teal	pmp22a
tdh2	0.00291313	0.207863	0.452	0.384	1	1_teal	tdh
serpinb1	0.00295267	0.122776	0.492	0.415	1	1_teal	serpinb1
appb	0.0029665	0.148512	0.346	0.275	1	1_teal	appb
si:ch211-15b10.6	0.00297347	0.166314	0.316	0.243	1	1_teal	si:ch211-15b10.6
snx6	0.00362779	0.109004	0.156	0.1	1	1_teal	snx6
dusp11	0.00396535	0.215295	0.405	0.349	1	1_teal	dusp1
pgrmc1	0.00404879	0.140942	0.522	0.466	1	1_teal	pgrmc1
serinc1	0.00459732	0.106055	0.435	0.353	1	1_teal	serinc1
map1lc3a1	0.00479529	0.125137	0.429	0.358	1	1_teal	map1lc3a
aldh2.2	0.00494102	0.117787	0.209	0.15	1	1_teal	aldh2.2
pnrc21	0.00556377	0.10578	0.877	0.835	1	1_teal	pnrc2
myl9b	0.00557306	0.143524	0.395	0.332	1	1_teal	myl9b
fscn1a1	0.00577849	0.108174	0.342	0.262	1	1_teal	fscn1a
fosl1a1	0.0065446	0.107076	0.701	0.625	1	1_teal	fosl1a
ctsla2	0.00671626	0.1488	0.664	0.631	1	1_teal	ctsla
uqcrfs11	0.00708574	0.115734	0.359	0.286	1	1_teal	uqcrfs1
2020-09-10	0.00718271	0.116818	0.375	0.306	1	1_teal	2020-09-10
qkia	0.00803054	0.155282	0.452	0.393	1	1_teal	qkia
spry2	0.0094375	0.126292	0.352	0.284	1	1_teal	spry2
krt4	1.93858e-266	1.66931	0.785	0.013	2.89973e-262	3.1	krt4
zgc:153311	1.39544e-255	1.46245	0.878	0.042	2.08731e-251	3.1	zgc:153311
icn	1.14149e-233	2.09401	0.97	0.095	1.70745e-229	3.1	icn
ndrg1a	3.51681e-222	1.20278	0.717	0.02	5.26044e-218	3.1	ndrg1a
fn1b	7.52783e-219	1.14029	0.705	0.02	1.12601e-214	3.1	fn1b
dkk3b	3.62516e-215	0.976513	0.675	0.016	5.42251e-211	3.1	dkk3b
csf1a	2.61764e-207	0.731386	0.595	0.005	3.91546e-203	3.1	csf1a
ucmaa	7.52455e-206	0.932784	0.629	0.012	1.12552e-201	3.1	ucmaa
cfl1l	2.19186e-204	1.70307	0.911	0.097	3.27858e-200	3.1	cfl1l
nog3	2.58846e-204	0.893273	0.658	0.018	3.87182e-200	3.1	nog3
nog1	3.98119e-203	1.69422	0.743	0.04	5.95507e-199	3.1	nog1
lhx9	6.07991e-198	1.18447	0.861	0.082	9.09433e-194	3.1	lhx9
slc4a4a	7.59802e-191	1.47695	0.92	0.111	1.13651e-186	3.1	slc4a4a
si:ch211-105c13.3	1.83049e-190	0.984885	0.738	0.046	2.73804e-186	3.1	si:ch211-105c13.3
gpm6ab	1.85766e-190	0.735676	0.629	0.019	2.77868e-186	3.1	gpm6ab
anxa1a	1.88217e-182	1.34169	0.755	0.057	2.81534e-178	3.1	anxa1a
tmeff1b	6.79457e-181	0.869359	0.734	0.05	1.01633e-176	3.1	tmeff1b
cahz	1.47182e-180	1.72247	0.861	0.11	2.20155e-176	3.1	cahz
fam84a	3.89575e-177	0.736686	0.616	0.023	5.82726e-173	3.1	fam84a
slc12a7b	3.859e-165	0.93599	0.785	0.085	5.7723e-161	3.1	slc12a7b
bnc2	5.99294e-164	0.77009	0.709	0.057	8.96424e-160	3.1	bnc2
id2a	8.713e-164	1.47834	0.819	0.101	1.30329e-159	3.1	id2a
jam2b	7.00147e-161	0.725307	0.464	0.003	1.04728e-156	3.1	jam2b
camta1a	7.46546e-161	0.533731	0.485	0.006	1.11668e-156	3.1	camta1a
ehd2b	1.53635e-159	1.14222	0.814	0.104	2.29807e-155	3.1	ehd2b
krt18b	5.22631e-157	1.07531	0.776	0.078	7.81751e-153	3.1	krt18b
hsd11b2	6.60617e-156	1.30632	0.696	0.064	9.88151e-152	3.1	hsd11b2
rab6ba	3.75868e-151	0.638356	0.616	0.039	5.62223e-147	3.1	rab6ba
spaca4l	5.68972e-145	0.722761	0.439	0.006	8.51068e-141	3.1	spaca4l
tmem98	7.49574e-145	0.46463	0.464	0.01	1.12121e-140	3.1	tmem98
cotl1	3.0247e-143	0.811366	0.565	0.031	4.52435e-139	3.1	cotl1
ackr3b	7.10486e-140	1.12056	0.848	0.147	1.06274e-135	3.1	ackr3b
irx3a	1.22916e-137	0.781455	0.755	0.093	1.83857e-133	3.1	irx3a
si:ch211-207d6.2	3.37606e-136	0.719388	0.7	0.075	5.04991e-132	3.1	si:ch211-207d6.2
si:ch211-222l21.1	2.02661e-135	1.38984	0.852	0.16	3.0314e-131	3.1	si:ch211-222l21.1
nat8l	1.10896e-132	0.792401	0.595	0.049	1.65879e-128	3.1	nat8l
cxcl20	2.21153e-132	0.530241	0.439	0.011	3.30801e-128	3.1	cxcl20
col1a1a	7.70228e-131	0.594724	0.426	0.01	1.15211e-126	3.1	col1a1a
tdrd1	6.20141e-126	0.709499	0.426	0.012	9.27606e-122	3.1	tdrd1
zgc:114181	1.52624e-125	1.10334	0.899	0.211	2.28295e-121	3.1	zgc:114181
kcnip1b	4.09351e-125	0.382851	0.384	0.005	6.12307e-121	3.1	kcnip1b
pleca	1.33624e-124	0.785833	0.684	0.088	1.99875e-120	3.1	pleca
ftr82	4.07372e-124	0.59501	0.612	0.058	6.09347e-120	3.1	ftr82
afap1l1a	7.63619e-124	0.579509	0.582	0.05	1.14222e-119	3.1	afap1l1a
si:ch211-66e2.3	8.87917e-123	0.518243	0.388	0.007	1.32815e-118	3.1	si:ch211-66e2.3
epcam	1.41176e-122	1.22057	0.591	0.053	2.11171e-118	3.1	epcam
zgc:110182	1.85169e-119	0.962452	0.726	0.112	2.76976e-115	3.1	zgc:110182
ppdpfb	1.53297e-117	1.19386	0.823	0.174	2.29302e-113	3.1	ppdpfb
arvcfb	7.16967e-116	0.478727	0.489	0.031	1.07244e-111	3.1	arvcfb
krt15	2.93872e-114	0.843364	0.409	0.015	4.39574e-110	3.1	krt15
sox4a.1	7.90575e-114	0.74248	0.464	0.026	1.18254e-109	3.1	sox4a.1
nkd1	6.79715e-112	0.640902	0.637	0.081	1.01672e-107	3.1	nkd1
col27a1b	2.32257e-109	0.449689	0.447	0.026	3.4741e-105	3.1	col27a1b
lef1	2.80294e-109	0.516098	0.536	0.049	4.19263e-105	3.1	lef1
krt94	1.51973e-108	0.981963	0.734	0.113	2.27321e-104	3.1	krt94
tnfrsf9a	4.96762e-107	0.743005	0.414	0.02	7.43056e-103	3.1	tnfrsf9a
col6a1	1.32624e-106	0.690913	0.397	0.017	1.98379e-102	3.1	col6a1
irx5a	5.93977e-106	0.608916	0.667	0.095	8.88471e-102	3.1	irx5a
rbpms2a	6.69016e-106	0.514051	0.43	0.024	1.00071e-101	3.1	rbpms2a
si:dkey-28b4.7	1.32871e-105	0.778152	0.646	0.092	1.98749e-101	3.1	si:dkey-28b4.7
kctd12.2	1.59317e-105	0.930443	0.738	0.149	2.38306e-101	3.1	kctd12.2
hsbp1a	3.42378e-102	0.827399	0.747	0.155	5.12129e-98	3.1	hsbp1a
podxl	2.75805e-101	0.934011	0.527	0.056	4.12549e-97	3.1	podxl
si:dkey-188i13.6	8.24594e-101	0.924268	0.679	0.115	1.23343e-96	3.1	si:dkey-188i13.6
fstl3	6.94293e-100	1.05297	0.747	0.15	1.03852e-95	3.1	fstl3
frzb	1.66095e-99	0.391386	0.325	0.007	2.48444e-95	3.1	frzb
si:ch211-207i1.2	2.36679e-98	0.448318	0.422	0.028	3.54024e-94	3.1	si:ch211-207i1.2
CU468917.1	2.64323e-98	0.603006	0.489	0.046	3.95375e-94	3.1	CU468917.1
net1	5.96383e-98	1.07871	0.764	0.186	8.9207e-94	3.1	net1
cyp26a1	3.15201e-96	0.709001	0.409	0.027	4.71478e-92	3.1	cyp26a1
hbegfa	1.3906e-95	0.915483	0.62	0.094	2.08007e-91	3.1	hbegfa
CABZ01092746.1	7.72813e-95	0.365559	0.312	0.007	1.15597e-90	3.1	CABZ01092746.1
fxyd1	8.35588e-95	0.634031	0.523	0.061	1.24987e-90	3.1	fxyd1
sox6	1.06044e-94	0.708327	0.633	0.11	1.5862e-90	3.1	sox6
atoh8	2.86342e-93	0.535928	0.523	0.06	4.28311e-89	3.1	atoh8
six2a	5.98489e-93	0.299545	0.287	0.004	8.9522e-89	3.1	six2a
lrrn1	2.81319e-91	0.347934	0.342	0.014	4.20797e-87	3.1	lrrn1
s100a10b	2.10019e-90	1.1338	0.987	0.589	3.14146e-86	3.1	s100a10b
spint1a	2.36814e-87	0.345204	0.316	0.011	3.54226e-83	3.1	spint1a
gcga	7.06923e-87	0.689064	0.274	0.004	1.05742e-82	3.1	gcga
emilin1a	3.65657e-86	0.711792	0.755	0.183	5.4695e-82	3.1	emilin1a
col4a1	7.46554e-84	0.418888	0.443	0.045	1.1167e-79	3.1	col4a1
rbfox1	5.61084e-83	0.332812	0.346	0.02	8.3927e-79	3.1	rbfox1
neurl1b	3.17649e-82	0.320418	0.338	0.019	4.7514e-78	3.1	neurl1b
cd151	1.03672e-81	0.430894	0.346	0.021	1.55072e-77	3.1	cd151
ccn2a	2.15426e-81	1.12886	0.464	0.054	3.22234e-77	3.1	ccn2a
cdh4	5.62247e-81	0.647297	0.658	0.124	8.4101e-77	3.1	cdh4
rpl23	2.20624e-79	0.496181	1	0.992	3.30009e-75	3.1	rpl23
c1qtnf12	3.48485e-79	0.24577	0.241	0.003	5.21263e-75	3.1	c1qtnf12
postnb	3.1168e-78	0.335056	0.278	0.009	4.66211e-74	3.1	postnb
nfkbiaa	2.13766e-77	1.19695	0.57	0.101	3.19751e-73	3.1	nfkbiaa
elovl1b	3.01473e-77	0.544994	0.532	0.08	4.50944e-73	3.1	elovl1b
ms4a17a.5	2.5329e-76	0.320009	0.346	0.024	3.78872e-72	3.1	ms4a17a.5
zfp36l2	8.04106e-76	0.542377	0.418	0.045	1.20278e-71	3.1	zfp36l2
ppiaa	2.01101e-75	0.819442	0.975	0.616	3.00806e-71	3.1	ppiaa
hoxb7a	2.72799e-75	0.274955	0.312	0.017	4.08053e-71	3.1	hoxb7a
spint2	2.75488e-73	0.352452	0.295	0.015	4.12076e-69	3.1	spint2
hoxb3a	2.36497e-72	0.310312	0.359	0.031	3.53752e-68	3.1	hoxb3a
pfn1	6.10416e-72	0.621932	0.557	0.094	9.1306e-68	3.1	pfn1
apln	6.20381e-72	0.244594	0.249	0.007	9.27965e-68	3.1	apln
p3h2	6.24143e-71	0.267338	0.274	0.012	9.33593e-67	3.1	p3h2
vcam1b	1.57989e-70	0.329086	0.266	0.011	2.3632e-66	3.1	vcam1b
flnb	2.35572e-70	0.276855	0.241	0.006	3.52368e-66	3.1	flnb
rpl35	2.49018e-70	0.516645	1	0.983	3.72482e-66	3.1	rpl35
negr1	4.1423e-70	0.221198	0.228	0.004	6.19605e-66	3.1	negr1
ahnak	4.44367e-70	0.961264	0.911	0.425	6.64684e-66	3.1	ahnak
rab3db	1.09466e-69	0.259635	0.27	0.012	1.6374e-65	3.1	rab3db
mxra8a	3.15106e-69	0.482603	0.511	0.083	4.71335e-65	3.1	mxra8a
dnah2	9.02737e-69	0.278774	0.211	0.003	1.35031e-64	3.1	dnah2
magi1b	8.35919e-68	0.467051	0.578	0.122	1.25037e-63	3.1	magi1b
slc29a1a	3.05812e-67	0.673577	0.616	0.139	4.57433e-63	3.1	slc29a1a
ppdpfa	7.14901e-66	0.396945	0.321	0.027	1.06935e-61	3.1	ppdpfa
rpl22	8.95123e-66	0.544403	1	0.928	1.33893e-61	3.1	rpl22
col6a2	1.91052e-65	0.408411	0.295	0.021	2.85776e-61	3.1	col6a2
st5	8.94259e-65	0.574235	0.705	0.209	1.33763e-60	3.1	st5
rpl14	9.6166e-65	0.471653	1	0.987	1.43845e-60	3.1	rpl14
rps27.2	2.82351e-64	0.48532	1	0.959	4.22341e-60	3.1	rps27.2
f8	3.5661e-64	0.206134	0.198	0.003	5.33417e-60	3.1	f8
ppp1r9ba	6.38739e-64	0.348246	0.367	0.042	9.55425e-60	3.1	ppp1r9ba
ca16b	1.22833e-63	0.280581	0.283	0.019	1.83733e-59	3.1	ca16b
col5a1	2.92679e-63	0.406116	0.308	0.025	4.3779e-59	3.1	col5a1
col5a2a	3.95198e-63	0.228064	0.224	0.007	5.91137e-59	3.1	col5a2a
nfia	4.79741e-63	0.353771	0.414	0.058	7.17597e-59	3.1	nfia
si:ch211-1a19.3	5.44674e-63	0.703491	0.679	0.179	8.14724e-59	3.1	si:ch211-1a19.3
rps26	7.01616e-63	0.511393	1	0.959	1.04948e-58	3.1	rps26
cxcl18b	7.16697e-63	1.37902	0.654	0.195	1.07204e-58	3.1	cxcl18b
col6a3	8.49418e-63	0.298127	0.219	0.006	1.27056e-58	3.1	col6a3
wls	1.87011e-62	0.466449	0.494	0.085	2.79731e-58	3.1	wls
CT027638.1	9.80516e-62	1.12913	0.591	0.147	1.46666e-57	3.1	CT027638.1
cav1	2.32473e-61	0.730451	0.722	0.263	3.47734e-57	3.1	cav1
flrt2.1	2.85032e-61	0.182509	0.186	0.002	4.26351e-57	3.1	flrt2.1
flt4	3.44983e-61	0.228852	0.232	0.01	5.16025e-57	3.1	flt4
glo1	4.44261e-61	0.369394	0.388	0.049	6.64526e-57	3.1	glo1
rpl12	8.25543e-61	0.378396	1	0.996	1.23485e-56	3.1	rpl12
hdlbpa	1.18228e-60	0.396529	0.392	0.05	1.76846e-56	3.1	hdlbpa
mfap5	2.83096e-60	0.274955	0.266	0.017	4.23455e-56	3.1	mfap5
kcnq1.1	3.37554e-60	0.242899	0.249	0.013	5.04914e-56	3.1	kcnq1.1
txnipa	9.13329e-60	0.679711	0.616	0.151	1.36616e-55	3.1	txnipa
fzd10	2.28556e-58	0.3412	0.384	0.052	3.41874e-54	3.1	fzd10
atp2a3	3.52338e-58	0.251593	0.287	0.024	5.27027e-54	3.1	atp2a3
tcima	5.15196e-58	0.788695	0.312	0.031	7.70631e-54	3.1	tcima
shdb	1.45956e-57	0.316282	0.283	0.023	2.18321e-53	3.1	shdb
mgst3a	6.1365e-57	0.441019	0.384	0.054	9.17897e-53	3.1	mgst3a
tenm3	1.82523e-56	0.35458	0.409	0.064	2.73018e-52	3.1	tenm3
rplp2	1.02676e-55	0.576604	0.979	0.803	1.53583e-51	3.1	rplp2
lmo7a	2.4415e-55	0.242899	0.236	0.014	3.652e-51	3.1	lmo7a
dhrs9	2.76841e-55	0.193892	0.186	0.004	4.14098e-51	3.1	dhrs9
esr2b	6.35819e-55	0.356975	0.456	0.087	9.51058e-51	3.1	esr2b
ch25h	9.49158e-55	0.88953	0.376	0.056	1.41975e-50	3.1	ch25h
si:ch211-253b8.5	2.11752e-54	0.204454	0.198	0.007	3.16738e-50	3.1	si:ch211-253b8.5
rps14	3.03045e-54	0.365703	1	0.999	4.53295e-50	3.1	rps14
f11r.1	3.18059e-54	0.473229	0.57	0.133	4.75753e-50	3.1	f11r.1
rps15	3.79279e-54	0.360249	1	0.999	5.67326e-50	3.1	rps15
rassf7b	4.78196e-54	0.217315	0.236	0.015	7.15285e-50	3.1	rassf7b
col14a1a	4.91859e-54	0.289839	0.257	0.02	7.35723e-50	3.1	col14a1a
ccnd1	1.2329e-53	0.358177	0.46	0.088	1.84417e-49	3.1	ccnd1
jpt1b	2.75924e-53	0.529128	0.57	0.138	4.12727e-49	3.1	jpt1b
slc26a4	3.69085e-52	0.159954	0.165	0.003	5.52077e-48	3.1	slc26a4
zgc:92313	5.27956e-52	0.372211	0.367	0.053	7.89717e-48	3.1	zgc:92313
adh5	1.83585e-51	0.534105	0.658	0.197	2.74606e-47	3.1	adh5
ahcyl2	2.52275e-51	0.465205	0.532	0.136	3.77353e-47	3.1	ahcyl2
tmem258	5.49493e-51	0.396544	0.435	0.079	8.21932e-47	3.1	tmem258
si:dkey-112e7.2	5.65425e-51	0.40547	0.418	0.075	8.45763e-47	3.1	si:dkey-112e7.2
erbb4b	8.79976e-51	0.17355	0.169	0.004	1.31627e-46	3.1	erbb4b
foxj1a	1.17161e-50	0.435927	0.228	0.015	1.75249e-46	3.1	foxj1a
epha6	2.56024e-50	0.190073	0.19	0.008	3.8296e-46	3.1	epha6
rpl31	2.90394e-50	0.402494	1	0.992	4.34371e-46	3.1	rpl31
alkbh3.1	3.6301e-50	0.433588	0.304	0.037	5.42991e-46	3.1	alkbh3.1
eevs	1.95255e-49	0.164546	0.173	0.005	2.92062e-45	3.1	eevs
tpt1	3.95475e-49	0.522698	0.979	0.833	5.91551e-45	3.1	tpt1
cldnc	5.04e-49	0.436552	0.409	0.076	7.53883e-45	3.1	cldnc
cldn7b	6.1561e-49	0.394673	0.325	0.044	9.20829e-45	3.1	cldn7b
rps9	1.02879e-48	0.35573	1	0.994	1.53886e-44	3.1	rps9
rps22	4.39378e-48	0.408423	1	0.988	6.57221e-44	3.1	rps2
rhbdl3	8.42789e-48	0.160592	0.152	0.003	1.26064e-43	3.1	rhbdl3
rps25	1.1171e-47	0.401801	1	0.988	1.67095e-43	3.1	rps25
nuak1b	1.75803e-47	0.200508	0.224	0.017	2.62967e-43	3.1	nuak1b
prdx5	2.49146e-47	0.518269	0.675	0.216	3.72672e-43	3.1	prdx5
midn	2.49147e-47	0.808727	0.603	0.19	3.72674e-43	3.1	midn
gpx1b	6.04159e-47	0.221272	0.224	0.017	9.03701e-43	3.1	gpx1b
wdr93	9.67373e-47	0.129721	0.135	0.001	1.447e-42	3.1	wdr93
rpl30	1.1546e-46	0.406746	1	0.963	1.72706e-42	3.1	rpl30
srpx	2.52764e-46	0.213976	0.219	0.017	3.78084e-42	3.1	srpx
lmo4a	2.89283e-46	0.236732	0.295	0.038	4.32709e-42	3.1	lmo4a
tuba8l3	3.78596e-46	0.282861	0.304	0.041	5.66304e-42	3.1	tuba8l3
zgc:152791	5.34969e-46	0.739673	0.789	0.329	8.00207e-42	3.1	zgc:152791
rps19	1.51734e-45	0.346304	1	0.997	2.26964e-41	3.1	rps19
nanos1	1.78962e-45	0.453881	0.57	0.162	2.67691e-41	3.1	nanos1
csrp1a	2.40749e-45	0.389748	0.38	0.07	3.60113e-41	3.1	csrp1a
grhl1	3.06744e-45	0.242383	0.27	0.031	4.58828e-41	3.1	grhl1
myrf	6.75695e-45	0.135822	0.139	0.002	1.0107e-40	3.1	myrf
fgl2a	2.52426e-44	0.337345	0.397	0.078	3.77579e-40	3.1	fgl2a
ptprr	3.59715e-44	0.167461	0.165	0.006	5.38062e-40	3.1	ptprr
uba52	3.81324e-44	0.318603	1	0.997	5.70384e-40	3.1	uba52
ttyh2	4.9517e-44	0.213347	0.219	0.019	7.40675e-40	3.1	ttyh2
rbm47	4.9813e-44	0.185003	0.198	0.013	7.45103e-40	3.1	rbm47
sec61g	9.02937e-44	0.638391	0.878	0.528	1.35061e-39	3.1	sec61g
si:ch211-198c19.3	1.54578e-43	0.195594	0.194	0.013	2.31217e-39	3.1	si:ch211-198c19.3
gli2a	1.6778e-43	0.143599	0.152	0.004	2.50965e-39	3.1	gli2a
cd9a	2.66318e-43	0.312625	0.38	0.075	3.98359e-39	3.1	cd9a
si:ch211-137i24.101	2.69372e-43	0.5563	0.781	0.32	4.02926e-39	3.1	si:ch211-137i24.10
zgc:153372	5.48441e-43	0.309681	0.392	0.081	8.20358e-39	3.1	zgc:153372
rpl18a	2.93383e-42	0.33883	1	0.998	4.38842e-38	3.1	rpl18a
anxa5b	3.43989e-42	0.332433	0.392	0.076	5.14539e-38	3.1	anxa5b
itgb4	4.48321e-42	0.129081	0.127	0.001	6.70598e-38	3.1	itgb4
cox8b	6.94425e-42	0.265934	0.278	0.037	1.03872e-37	3.1	cox8b
rai14	7.18521e-42	0.211253	0.232	0.024	1.07476e-37	3.1	rai14
hopx	1.71152e-41	0.332571	0.219	0.02	2.56009e-37	3.1	hopx
rpl33	2.89059e-41	0.455693	0.996	0.921	4.32374e-37	3.1	rpl3
dmxl2	3.14033e-41	0.236363	0.249	0.029	4.69731e-37	3.1	dmxl2
rps16	4.06074e-41	0.316896	1	0.997	6.07406e-37	3.1	rps16
plxnb1a	5.49037e-41	0.344201	0.376	0.073	8.2125e-37	3.1	plxnb1a
si:dkey-151g10.6	6.03756e-41	0.350036	1	0.999	9.03098e-37	3.1	si:dkey-151g10.6
dbn1	6.52727e-41	0.25572	0.27	0.037	9.76349e-37	3.1	dbn1
rps11	6.69317e-41	0.303323	1	0.997	1.00116e-36	3.1	rps11
aplp1	6.8443e-41	0.204982	0.219	0.021	1.02377e-36	3.1	aplp1
gig2d	7.05288e-41	0.235987	0.194	0.015	1.05497e-36	3.1	gig2d
krt8	1.48258e-40	0.489242	1	0.955	2.21764e-36	3.1	krt8
sertad4	1.48489e-40	0.141232	0.139	0.004	2.22109e-36	3.1	sertad4
pbx3b	1.80238e-40	0.138214	0.135	0.003	2.696e-36	3.1	pbx3b
im:7151449	3.48983e-40	0.148935	0.156	0.007	5.22009e-36	3.1	im:7151449
pard6a	4.77387e-40	0.184672	0.194	0.015	7.14075e-36	3.1	pard6a
rps27.1	5.09867e-40	0.323012	1	0.987	7.6266e-36	3.1	rps27.1
litaf	6.48431e-40	0.372174	0.388	0.084	9.69924e-36	3.1	litaf
ptprua	1.02414e-39	0.149998	0.165	0.009	1.53192e-35	3.1	ptprua
chd5	1.67525e-39	0.188401	0.203	0.018	2.50583e-35	3.1	chd5
rpl13	1.72371e-39	0.26894	1	0.999	2.57833e-35	3.1	rpl13
slc29a4	2.0044e-39	0.1363	0.143	0.005	2.99819e-35	3.1	slc29a4
rpl24	2.77139e-39	0.308759	1	0.997	4.14545e-35	3.1	rpl24
esr2a	3.30188e-39	0.372391	0.477	0.135	4.93895e-35	3.1	esr2a
fap	4.11094e-39	0.110389	0.118	0.001	6.14914e-35	3.1	fap
sp5a	4.22185e-39	0.165553	0.156	0.008	6.31504e-35	3.1	sp5a
wt1a	5.20969e-39	0.228331	0.27	0.039	7.79265e-35	3.1	wt1a
serpine3	5.50573e-39	0.141232	0.131	0.003	8.23548e-35	3.1	serpine3
neurl1ab	5.66688e-39	0.267783	0.312	0.054	8.47651e-35	3.1	neurl1ab
kank2	7.25104e-39	0.173015	0.203	0.019	1.08461e-34	3.1	kank2
hoxb5a	7.2827e-39	0.19182	0.203	0.019	1.08935e-34	3.1	hoxb5a
cavin1b	8.69421e-39	0.60549	0.658	0.273	1.30048e-34	3.1	cavin1b
pigr	3.12729e-38	0.139319	0.143	0.006	4.6778e-34	3.1	pigr
rps26l	3.49801e-38	0.358093	1	0.992	5.23232e-34	3.1	rps26l
si:dkey-28b4.8	4.53038e-38	0.248704	0.316	0.058	6.77654e-34	3.1	si:dkey-28b4.8
tmcc3	6.61655e-38	0.214959	0.245	0.032	9.89704e-34	3.1	tmcc3
rps24	3.54231e-37	0.299489	1	0.999	5.29859e-33	3.1	rps24
ifi46	4.40618e-37	0.56334	0.949	0.664	6.59076e-33	3.1	ifi46
irf8	5.34852e-37	0.259262	0.203	0.02	8.00031e-33	3.1	irf8
rps8a	6.53714e-37	0.311936	0.996	0.996	9.77826e-33	3.1	rps8a
nr0b2a	7.10011e-37	0.168098	0.139	0.006	1.06203e-32	3.1	nr0b2a
lurap1	7.861e-37	0.205885	0.249	0.035	1.17585e-32	3.1	lurap1
rpl36a	8.21371e-37	0.358761	1	0.997	1.22861e-32	3.1	rpl36a
tpd52l2b	9.47158e-37	0.346878	0.447	0.116	1.41676e-32	3.1	tpd52l2b
serpinh1b	1.06242e-36	0.583168	0.418	0.104	1.58917e-32	3.1	serpinh1b
col4a2	1.77504e-36	0.280988	0.295	0.053	2.65511e-32	3.1	col4a2
si:dkeyp-75h12.5	1.78009e-36	0.410704	0.447	0.122	2.66266e-32	3.1	si:dkeyp-75h12.5
fras1	1.93148e-36	0.209821	0.262	0.039	2.88911e-32	3.1	fras1
txn	2.56637e-36	0.273977	0.295	0.051	3.83878e-32	3.1	txn
rps7	3.14479e-36	0.284215	1	0.999	4.70398e-32	3.1	rps7
sdcbp2	3.612e-36	0.516166	0.776	0.375	5.40282e-32	3.1	sdcbp2
col1a2	5.42399e-36	0.174528	0.118	0.003	8.1132e-32	3.1	col1a2
eef1g	5.42872e-36	0.396611	0.996	0.969	8.12028e-32	3.1	eef1g
dchs1a	5.6789e-36	0.239326	0.308	0.056	8.4945e-32	3.1	dchs1a
mapk8ip1a	7.66362e-36	0.154811	0.186	0.017	1.14632e-31	3.1	mapk8ip1a
tbx2b	1.37169e-35	0.13487	0.152	0.009	2.05178e-31	3.1	tbx2b
rpl34	2.15239e-35	0.384157	0.992	0.913	3.21955e-31	3.1	rpl34
tmsb11	2.23626e-35	0.673604	0.966	0.761	3.34499e-31	3.1	tmsb1
RPS17	2.44131e-35	0.319167	1	0.992	3.65172e-31	3.1	RPS17
eef1db	3.65854e-35	0.556835	0.878	0.555	5.47244e-31	3.1	eef1db
ctsk	4.16105e-35	0.31931	0.473	0.138	6.22409e-31	3.1	ctsk
rpl23a	7.07612e-35	0.317911	1	0.986	1.05845e-30	3.1	rpl23a
rps28	1.12097e-34	0.365691	1	0.994	1.67674e-30	3.1	rps28
tppp3	1.19784e-34	0.175467	0.11	0.002	1.79172e-30	3.1	tppp3
si:dkey-188i13.9	1.21707e-34	0.348787	0.367	0.086	1.8205e-30	3.1	si:dkey-188i13.9
ppfibp1a	1.42617e-34	0.440511	0.612	0.217	2.13326e-30	3.1	ppfibp1a
sec61a1	2.01686e-34	0.246473	0.266	0.042	3.01682e-30	3.1	sec61a1
cxxc5a	3.57855e-34	0.34904	0.481	0.152	5.35279e-30	3.1	cxxc5a
twist1a	6.01621e-34	0.195125	0.181	0.017	8.99905e-30	3.1	twist1a
raraa	6.32659e-34	0.220454	0.241	0.036	9.46331e-30	3.1	raraa
ndrg4	1.03971e-33	0.195025	0.219	0.029	1.5552e-29	3.1	ndrg4
wscd2	1.30858e-33	0.130084	0.139	0.008	1.95738e-29	3.1	wscd2
anxa3b	3.03921e-33	0.312268	0.456	0.126	4.54604e-29	3.1	anxa3b
igfbp1a	3.86896e-33	0.315405	0.135	0.007	5.78718e-29	3.1	igfbp1a
rxfp2a	3.98544e-33	0.112238	0.11	0.003	5.96142e-29	3.1	rxfp2a
rps10	5.03851e-33	0.235261	1	1	7.53661e-29	3.1	rps10
s100v2	5.78489e-33	0.550517	0.861	0.53	8.65304e-29	3.1	s100v2
arhgdig	6.63015e-33	0.293203	0.329	0.07	9.91738e-29	3.1	arhgdig
rps29	7.74387e-33	0.389938	1	0.993	1.15833e-28	3.1	rps29
cdh2	9.97976e-33	0.39679	0.451	0.144	1.49277e-28	3.1	cdh2
ap1b1	1.8306e-32	0.181816	0.19	0.02	2.73822e-28	3.1	ap1b1
rpl13a	1.90732e-32	0.234613	1	0.999	2.85298e-28	3.1	rpl13a
rpl15	3.38491e-32	0.348052	0.996	0.98	5.06315e-28	3.1	rpl15
ngdn	3.58167e-32	0.229035	0.253	0.041	5.35746e-28	3.1	ngdn
tnk2b	3.59884e-32	0.168267	0.181	0.019	5.38314e-28	3.1	tnk2b
rps181	5.37971e-32	0.372936	0.983	0.894	8.04697e-28	3.1	rps18
fgfr3	6.66748e-32	0.339509	0.456	0.13	9.97322e-28	3.1	fgfr3
rgs16	8.79293e-32	0.150846	0.11	0.003	1.31525e-27	3.1	rgs16
nab2	1.02394e-31	0.10533	0.105	0.003	1.53161e-27	3.1	nab2
map1ab	1.0601e-31	0.168816	0.139	0.009	1.58569e-27	3.1	map1ab
lzts2a	1.35029e-31	0.181826	0.211	0.029	2.01977e-27	3.1	lzts2a
tmem200b	2.35536e-31	0.160868	0.165	0.015	3.52314e-27	3.1	tmem200b
rasl11a	2.4326e-31	0.193958	0.232	0.036	3.63868e-27	3.1	rasl11a
glud1a	3.57795e-31	0.301284	0.447	0.125	5.3519e-27	3.1	glud1a
cgnl1	6.61321e-31	0.266773	0.338	0.082	9.89203e-27	3.1	cgnl1
afap1	8.43826e-31	0.138513	0.139	0.01	1.26219e-26	3.1	afap1
xbp1	8.44241e-31	0.583045	0.73	0.369	1.26282e-26	3.1	xbp1
gadd45bb	1.15305e-30	0.537948	0.35	0.086	1.72474e-26	3.1	gadd45bb
caprin1b	1.32591e-30	0.292696	0.43	0.12	1.9833e-26	3.1	caprin1b
sfrp1a	1.59968e-30	0.104053	0.11	0.004	2.3928e-26	3.1	sfrp1a
pdgfbb	2.42835e-30	0.124495	0.135	0.009	3.63233e-26	3.1	pdgfbb
ecm1a	2.60754e-30	0.106609	0.093	0.001	3.90036e-26	3.1	ecm1a
cd99	3.20162e-30	0.384454	0.473	0.155	4.78898e-26	3.1	cd99
rplp01	3.4654e-30	0.337931	1	0.983	5.18354e-26	3.1	rplp0
cd248a	3.85392e-30	0.118993	0.122	0.006	5.7647e-26	3.1	cd248a
CR753876.1	4.96378e-30	0.381536	0.232	0.038	7.42482e-26	3.1	CR753876.1
usp43b	6.17785e-30	0.186435	0.219	0.034	9.24083e-26	3.1	usp43b
unc13ba	6.44807e-30	0.117723	0.131	0.008	9.64502e-26	3.1	unc13ba
rpl28	1.18139e-29	0.239554	1	0.997	1.76712e-25	3.1	rpl28
rpl41	2.07485e-29	0.541981	0.848	0.522	3.10355e-25	3.1	rpl4
eef1b21	2.20622e-29	0.385763	0.97	0.814	3.30006e-25	3.1	eef1b2
rps27a	2.26432e-29	0.234616	1	1	3.38697e-25	3.1	rps27a
h2afvb	3.31768e-29	0.427975	0.511	0.164	4.96259e-25	3.1	h2afvb
fosl2	4.11139e-29	0.276711	0.371	0.103	6.14982e-25	3.1	fosl2
rps15a1	7.56824e-29	0.264539	1	0.999	1.13206e-24	3.1	rps15a
rps23	7.90863e-29	0.26349	1	0.994	1.18297e-24	3.1	rps23
lamb1b	1.42295e-28	0.150837	0.19	0.026	2.12845e-24	3.1	lamb1b
arhgap27l	1.46718e-28	0.158267	0.194	0.027	2.19461e-24	3.1	arhgap27l
rbfox3a	1.57778e-28	0.151047	0.165	0.018	2.36004e-24	3.1	rbfox3a
myl6	2.41373e-28	0.211432	0.283	0.059	3.61046e-24	3.1	myl6
rpl192	3.2798e-28	0.231524	1	0.999	4.90592e-24	3.1	rpl19
hpn	5.39342e-28	0.265274	0.46	0.148	8.06748e-24	3.1	hpn
kif19	8.06586e-28	0.12196	0.135	0.011	1.20649e-23	3.1	kif19
slc15a2	9.68518e-28	0.11026	0.127	0.009	1.44871e-23	3.1	slc15a2
pdia3	1.17637e-27	0.401767	0.586	0.233	1.75962e-23	3.1	pdia3
add3b	1.58174e-27	0.134562	0.156	0.017	2.36597e-23	3.1	add3b
spns2	2.07377e-27	0.101535	0.093	0.003	3.10195e-23	3.1	spns2
sik1	2.66852e-27	0.35636	0.527	0.19	3.99158e-23	3.1	sik1
esr1	6.4665e-27	0.172494	0.198	0.031	9.67259e-23	3.1	esr1
si:ch211-195b15.8	6.5205e-27	0.243276	0.266	0.057	9.75336e-23	3.1	si:ch211-195b15.8
efna1a	7.4866e-27	0.19029	0.232	0.044	1.11985e-22	3.1	efna1a
calm1b	7.62963e-27	0.199457	0.274	0.06	1.14124e-22	3.1	calm1b
si:ch211-105j21.9	8.30179e-27	0.117631	0.139	0.013	1.24178e-22	3.1	si:ch211-105j21.9
pcdh1b	1.00944e-26	0.150628	0.177	0.024	1.50992e-22	3.1	pcdh1b
ube2e1	1.48537e-26	0.20036	0.274	0.058	2.22182e-22	3.1	ube2e1
CR383676.1	3.21939e-26	0.249709	1	0.999	4.81556e-22	3.1	CR383676.1
rpl22l11	3.27889e-26	0.573296	0.726	0.366	4.90457e-22	3.1	rpl22l1
rpl171	4.00587e-26	0.236695	1	0.997	5.99198e-22	3.1	rpl17
zgc:92606	4.39795e-26	0.282556	0.443	0.142	6.57846e-22	3.1	zgc:92606
s100v1	4.44281e-26	0.125765	0.118	0.008	6.64555e-22	3.1	s100v1
ywhah	4.82958e-26	0.215908	0.338	0.09	7.22408e-22	3.1	ywhah
snx10a	7.29829e-26	0.130304	0.127	0.01	1.09168e-21	3.1	snx10a
prrg2	7.71721e-26	0.159181	0.181	0.026	1.15434e-21	3.1	prrg2
si:ch1073-303k11.2	8.09749e-26	0.117178	0.105	0.006	1.21122e-21	3.1	si:ch1073-303k11.2
rassf2a	9.22297e-26	0.217742	0.232	0.046	1.37957e-21	3.1	rassf2a
CABZ01073795.1	1.0106e-25	0.427929	0.426	0.142	1.51165e-21	3.1	CABZ01073795.1
hoxb6a	1.2197e-25	0.111531	0.114	0.008	1.82443e-21	3.1	hoxb6a
rpsa1	1.48135e-25	0.302288	1	0.983	2.21581e-21	3.1	rpsa
TENM3	1.92608e-25	0.136452	0.139	0.014	2.88103e-21	3.1	TENM3
tagapa	2.12126e-25	0.191243	0.186	0.028	3.17298e-21	3.1	tagapa
ncam1a	2.30382e-25	0.128549	0.139	0.014	3.44605e-21	3.1	ncam1a
aste1a	2.34291e-25	0.616301	0.586	0.281	3.50452e-21	3.1	aste1a
rock2b.1	2.65737e-25	0.147693	0.152	0.018	3.97489e-21	3.1	rock2b.1
zgc:113054	3.43531e-25	0.188852	0.211	0.038	5.13854e-21	3.1	zgc:113054
zgc:158463	3.43722e-25	0.584117	0.641	0.322	5.14139e-21	3.1	zgc:158463
rbpms2b	3.49122e-25	0.242895	0.181	0.027	5.22217e-21	3.1	rbpms2b
tmsb2	3.82552e-25	0.108991	0.11	0.007	5.72222e-21	3.1	tmsb2
rpl10a1	3.85338e-25	0.237501	1	0.997	5.76389e-21	3.1	rpl10a
tuba1a	4.48349e-25	0.141428	0.152	0.018	6.7064e-21	3.1	tuba1a
hsp90ab11	5.52751e-25	0.293925	1	0.981	8.26805e-21	3.1	hsp90ab1
pxna	7.01194e-25	0.157645	0.156	0.019	1.04885e-20	3.1	pxna
lasp1	8.28462e-25	0.326182	0.523	0.199	1.23921e-20	3.1	lasp1
glrx5	8.65489e-25	0.282626	0.447	0.151	1.2946e-20	3.1	glrx5
si:dkey-51e6.1	8.65547e-25	0.260591	0.262	0.061	1.29469e-20	3.1	si:dkey-51e6.1
rpl181	9.1271e-25	0.226946	1	0.995	1.36523e-20	3.1	rpl18
anxa11a	1.21158e-24	0.204398	0.291	0.07	1.81229e-20	3.1	anxa11a
eno3	1.32403e-24	0.25848	0.325	0.085	1.98049e-20	3.1	eno3
il17rd	1.98197e-24	0.158801	0.207	0.038	2.96463e-20	3.1	il17rd
rca2.1	2.57832e-24	0.243174	0.304	0.079	3.85665e-20	3.1	rca2.1
rpl61	6.16242e-24	0.460901	0.81	0.531	9.21774e-20	3.1	rpl6
lmbr1l	8.3539e-24	0.142678	0.165	0.024	1.24958e-19	3.1	lmbr1l
si:dkey-188i13.10	1.01973e-23	0.380204	0.65	0.301	1.52532e-19	3.1	si:dkey-188i13.10
slc25a23a	1.07938e-23	0.157414	0.181	0.029	1.61454e-19	3.1	slc25a23a
rplp2l	1.70706e-23	0.306624	0.996	0.992	2.55341e-19	3.1	rplp2l
calm3a	1.72082e-23	0.430486	0.738	0.372	2.57401e-19	3.1	calm3a
hoxb9a	1.75722e-23	0.100867	0.101	0.006	2.62845e-19	3.1	hoxb9a
tnfrsf11a	2.28312e-23	0.11392	0.122	0.012	3.41509e-19	3.1	tnfrsf11a
sec61b	3.37066e-23	0.298573	0.38	0.122	5.04184e-19	3.1	sec61b
ppp1r3ca	4.13252e-23	0.12981	0.131	0.014	6.18143e-19	3.1	ppp1r3ca
clk4a	4.53337e-23	0.250105	0.388	0.124	6.78101e-19	3.1	clk4a
tomm5	6.29839e-23	0.276504	0.523	0.201	9.42113e-19	3.1	tomm5
rpl21	1.13657e-22	0.222009	1	0.997	1.70008e-18	3.1	rpl21
afdna	1.37608e-22	0.293602	0.468	0.193	2.05834e-18	3.1	afdna
rpl37.1	1.89592e-22	0.275658	1	0.999	2.83592e-18	3.1	rpl37.1
itgav	1.89836e-22	0.193689	0.249	0.06	2.83956e-18	3.1	itgav
fzd7a	2.75835e-22	0.161267	0.19	0.035	4.12594e-18	3.1	fzd7a
anxa2a1	4.67396e-22	0.447175	0.797	0.425	6.99131e-18	3.1	anxa2a
ier5l	6.26843e-22	0.156862	0.127	0.014	9.37632e-18	3.1	ier5l
nacad	6.64239e-22	0.105778	0.122	0.013	9.93569e-18	3.1	nacad
anxa4	7.68315e-22	0.334733	0.54	0.227	1.14925e-17	3.1	anxa4
cldn5a	7.78178e-22	0.294919	0.553	0.253	1.164e-17	3.1	cldn5a
serpinf1	8.20591e-22	0.199905	0.266	0.068	1.22744e-17	3.1	serpinf1
gse1	9.20039e-22	0.138146	0.173	0.029	1.37619e-17	3.1	gse1
rps131	9.61904e-22	0.222684	1	0.998	1.43882e-17	3.1	rps13
rpl101	9.95874e-22	0.206396	1	0.998	1.48963e-17	3.1	rpl10
fat1a	1.00136e-21	0.279781	0.456	0.188	1.49783e-17	3.1	fat1a
hspb8	1.16195e-21	0.155838	0.215	0.046	1.73805e-17	3.1	hspb8
ace	1.63427e-21	0.158509	0.283	0.075	2.44454e-17	3.1	ace
st14a	1.64012e-21	0.217793	0.232	0.054	2.45329e-17	3.1	st14a
si:ch211-166a6.5	1.8052e-21	0.217887	0.333	0.106	2.70021e-17	3.1	si:ch211-166a6.5
capgb	1.81375e-21	0.102073	0.118	0.012	2.71301e-17	3.1	capgb
klf11b	2.04848e-21	0.335964	0.519	0.211	3.06411e-17	3.1	klf11b
zgc:1627301	2.40996e-21	0.624274	0.755	0.476	3.60482e-17	3.1	zgc:162730
tspan18b	2.55359e-21	0.278321	0.506	0.197	3.81966e-17	3.1	tspan18b
rpl36	2.80916e-21	0.278629	1	0.974	4.20195e-17	3.1	rpl36
si:rp71-36a1.1	3.38591e-21	0.291868	0.532	0.249	5.06465e-17	3.1	si:rp71-36a1.1
capn2b	3.79115e-21	0.202541	0.308	0.093	5.6708e-17	3.1	capn2b
mt-co31	4.10949e-21	0.245195	1	1	6.14698e-17	3.1	mt-co3
rps61	4.6954e-21	0.289894	0.987	0.921	7.02338e-17	3.1	rps6
dynll1	6.63421e-21	0.320899	0.367	0.116	9.92345e-17	3.1	dynll1
ptprz1a	7.93324e-21	0.112025	0.122	0.014	1.18665e-16	3.1	ptprz1a
sf3b1	9.47514e-21	0.201976	0.342	0.105	1.41729e-16	3.1	sf3b1
reep3a	1.43649e-20	0.166338	0.236	0.058	2.1487e-16	3.1	reep3a
nop53	1.57316e-20	0.278487	0.586	0.25	2.35314e-16	3.1	nop53
rsl24d1	1.76581e-20	0.383191	0.865	0.573	2.6413e-16	3.1	rsl24d1
serinc2	2.62475e-20	0.316578	0.536	0.231	3.92611e-16	3.1	serinc2
ca10a	2.78102e-20	0.121119	0.135	0.019	4.15985e-16	3.1	ca10a
lmo4b	3.56026e-20	0.101472	0.101	0.009	5.32544e-16	3.1	lmo4b
cd9b	4.1705e-20	0.1407	0.101	0.009	6.23823e-16	3.1	cd9b
tnrc6c1	4.30907e-20	0.276412	0.565	0.246	6.44551e-16	3.1	tnrc6c1
notum1b	4.57981e-20	0.122785	0.127	0.016	6.85048e-16	3.1	notum1b
si:dkeyp-9d4.2	6.8823e-20	0.255727	0.338	0.113	1.02945e-15	3.1	si:dkeyp-9d4.2
spata13	8.0603e-20	0.121119	0.135	0.019	1.20566e-15	3.1	spata13
htr1d	8.09933e-20	0.144678	0.186	0.038	1.2115e-15	3.1	htr1d
si:ch211-226m16.2	1.09582e-19	0.131623	0.16	0.028	1.63913e-15	3.1	si:ch211-226m16.2
rpl35a1	1.31086e-19	0.233446	1	0.991	1.96078e-15	3.1	rpl35a
mycbp	1.35309e-19	0.213991	0.291	0.084	2.02395e-15	3.1	mycbp
tnfb	1.98594e-19	0.178368	0.076	0.004	2.97057e-15	3.1	tnfb
mao	2.13945e-19	0.137661	0.19	0.04	3.20018e-15	3.1	mao
cd151l	2.62767e-19	0.142052	0.198	0.042	3.93048e-15	3.1	cd151l
hspb12	2.65355e-19	0.533551	0.857	0.561	3.96918e-15	3.1	hspb1
rpl38	2.69169e-19	0.283059	0.992	0.981	4.02624e-15	3.1	rpl38
si:ch211-156j16.11	2.81564e-19	0.330048	0.549	0.24	4.21164e-15	3.1	si:ch211-156j16.1
ccn11	2.89229e-19	0.539151	0.523	0.241	4.32629e-15	3.1	ccn1
rpl9.11	2.93372e-19	0.219127	1	0.995	4.38826e-15	3.1	rpl9.1
pnrc22	3.01948e-19	0.451178	0.945	0.826	4.51654e-15	3.1	pnrc2
gas1b	3.13056e-19	0.235814	0.371	0.139	4.68269e-15	3.1	gas1b
rps21	4.15033e-19	0.264918	1	0.995	6.20807e-15	3.1	rps21
rhocb	6.61525e-19	0.250394	0.405	0.15	9.89509e-15	3.1	rhocb
thy1	6.65288e-19	0.248515	0.156	0.028	9.95137e-15	3.1	thy1
cpne1	6.67565e-19	0.24382	0.464	0.184	9.98543e-15	3.1	cpne1
cebpa	7.57919e-19	0.105239	0.101	0.01	1.1337e-14	3.1	cebpa
ptp4a1	9.71948e-19	0.17494	0.211	0.05	1.45384e-14	3.1	ptp4a1
hsp90b1	1.23934e-18	0.215494	0.257	0.07	1.85381e-14	3.1	hsp90b1
si:dkey-112a7.4	1.4397e-18	0.22167	0.278	0.082	2.15351e-14	3.1	si:dkey-112a7.4
map2k1	1.7809e-18	0.223074	0.367	0.139	2.66386e-14	3.1	map2k1
ccdc88c	1.79298e-18	0.119766	0.148	0.026	2.68194e-14	3.1	ccdc88c
pcp4l1	1.90657e-18	0.163963	0.177	0.037	2.85185e-14	3.1	pcp4l1
sh3bgrl3	2.07893e-18	0.166296	0.236	0.061	3.10966e-14	3.1	sh3bgrl3
klf13	2.30368e-18	0.139949	0.186	0.041	3.44585e-14	3.1	klf13
ccni	2.52516e-18	0.336915	0.802	0.479	3.77713e-14	3.1	ccni
pkp2	3.08521e-18	0.113465	0.156	0.029	4.61485e-14	3.1	pkp2
vim	3.62255e-18	0.176843	0.148	0.026	5.4186e-14	3.1	vim
si:dkey-31f5.8	4.10147e-18	0.123521	0.122	0.017	6.13497e-14	3.1	si:dkey-31f5.8
RPL37A	4.41261e-18	0.252775	1	0.997	6.60038e-14	3.1	RPL37A
sumo2b	4.43242e-18	0.229019	0.464	0.187	6.63001e-14	3.1	sumo2b
fam171a2a	4.89803e-18	0.124315	0.165	0.033	7.32648e-14	3.1	fam171a2a
cdc42ep4b	5.24995e-18	0.16166	0.245	0.07	7.85288e-14	3.1	cdc42ep4b
fgfrl1a	6.36044e-18	0.155	0.257	0.074	9.51395e-14	3.1	fgfrl1a
yap1	7.51587e-18	0.260391	0.498	0.24	1.12422e-13	3.1	yap1
pfdn1	9.04535e-18	0.159691	0.236	0.063	1.353e-13	3.1	pfdn1
si:ch211-199g17.2	9.69559e-18	0.253646	0.624	0.294	1.45027e-13	3.1	si:ch211-199g17.2
fgfr1a	1.26777e-17	0.118611	0.135	0.022	1.89633e-13	3.1	fgfr1a
CU638714.1	1.3137e-17	0.142581	0.16	0.032	1.96503e-13	3.1	CU638714.1
hoxa3a	1.48569e-17	0.156441	0.211	0.054	2.2223e-13	3.1	hoxa3a
romo1	1.60612e-17	0.395354	0.776	0.485	2.40244e-13	3.1	romo1
tmem238a	1.80069e-17	0.157801	0.219	0.058	2.69348e-13	3.1	tmem238a
ablim1b	1.88868e-17	0.142662	0.177	0.039	2.82509e-13	3.1	ablim1b
ets2	2.68579e-17	0.155065	0.16	0.032	4.0174e-13	3.1	ets2
ankrd22	2.8215e-17	0.105639	0.118	0.017	4.2204e-13	3.1	ankrd22
si:dkey-16l2.16	3.91821e-17	0.171553	0.177	0.039	5.86085e-13	3.1	si:dkey-16l2.16
nme3	5.6261e-17	0.167615	0.245	0.069	8.41552e-13	3.1	nme3
vps28	6.41577e-17	0.136998	0.211	0.054	9.5967e-13	3.1	vps28
gsto2	7.9878e-17	0.152205	0.194	0.047	1.19482e-12	3.1	gsto2
rgs12b	8.23496e-17	0.166452	0.266	0.085	1.23178e-12	3.1	rgs12b
mmp2	9.19895e-17	0.346587	0.755	0.439	1.37598e-12	3.1	mmp2
znf703	9.33225e-17	0.141197	0.219	0.06	1.39592e-12	3.1	znf703
nupr1a	1.53119e-16	0.194452	0.409	0.157	2.29036e-12	3.1	nupr1a
zbtb20	1.54653e-16	0.285768	0.578	0.322	2.31329e-12	3.1	zbtb20
prr13	1.57059e-16	0.191603	0.325	0.113	2.34928e-12	3.1	prr13
arl6ip5b	1.89977e-16	0.208038	0.308	0.112	2.84168e-12	3.1	arl6ip5b
rpl72	2.08675e-16	0.186667	1	0.997	3.12136e-12	3.1	rpl7
mapk12a	2.1598e-16	0.137952	0.186	0.045	3.23062e-12	3.1	mapk12a
cux1a	2.22502e-16	0.226166	0.46	0.212	3.32819e-12	3.1	cux1a
hmgn2	2.34882e-16	0.2984	0.722	0.399	3.51336e-12	3.1	hmgn2
rpl5b1	2.64505e-16	0.307459	0.941	0.742	3.95646e-12	3.1	rpl5b
uqcc3	3.18616e-16	0.109382	0.105	0.014	4.76586e-12	3.1	uqcc3
ogt.1.1	3.36059e-16	0.151827	0.173	0.04	5.02676e-12	3.1	ogt.1.1
rps4x	3.68619e-16	0.224485	0.992	0.97	5.5138e-12	3.1	rps4x
eef1da1	4.91427e-16	0.340778	0.684	0.37	7.35076e-12	3.1	eef1da
mxb	5.2774e-16	0.167455	0.198	0.052	7.89393e-12	3.1	mxb
smad3a	5.53967e-16	0.189663	0.291	0.102	8.28624e-12	3.1	smad3a
aimp2	5.89903e-16	0.151772	0.228	0.065	8.82377e-12	3.1	aimp2
igfbp5b	6.16663e-16	0.237406	0.401	0.166	9.22405e-12	3.1	igfbp5b
sfpq	6.63934e-16	0.168187	0.232	0.067	9.93113e-12	3.1	sfpq
BX936337.1	7.842e-16	0.20747	0.308	0.108	1.17301e-11	3.1	BX936337.1
gpc4	9.53052e-16	0.308624	0.603	0.347	1.42557e-11	3.1	gpc4
krt91	9.67837e-16	0.21813	0.068	0.004	1.44769e-11	3.1	krt91
si:ch211-218c6.8	9.93067e-16	0.107808	0.148	0.029	1.48543e-11	3.1	si:ch211-218c6.8
rpl32	9.9636e-16	0.182984	1	0.999	1.49035e-11	3.1	rpl32
myh9a	1.27052e-15	0.112847	0.122	0.02	1.90045e-11	3.1	myh9a
h1fx	1.34203e-15	0.40914	0.641	0.355	2.00741e-11	3.1	h1fx
epdl1	1.44551e-15	0.137894	0.211	0.059	2.1622e-11	3.1	epdl1
dusp21	1.74827e-15	0.589997	0.629	0.399	2.61506e-11	3.1	dusp2
nfkbiab	2.00459e-15	0.225899	0.515	0.239	2.99846e-11	3.1	nfkbiab
rpl7a	2.22253e-15	0.194056	1	0.994	3.32446e-11	3.1	rpl7a
fam107b	2.50599e-15	0.12938	0.211	0.059	3.74846e-11	3.1	fam107b
ak2	2.53698e-15	0.203327	0.359	0.137	3.79482e-11	3.1	ak2
tfpia	2.7391e-15	0.119335	0.093	0.012	4.09714e-11	3.1	tfpia
rpl271	3.35345e-15	0.194117	1	0.994	5.01608e-11	3.1	rpl27
tpi1b	3.78541e-15	0.213012	0.295	0.104	5.66222e-11	3.1	tpi1b
znf503	4.05501e-15	0.105149	0.11	0.017	6.06549e-11	3.1	znf503
f3a	5.30231e-15	0.105149	0.105	0.016	7.93119e-11	3.1	f3a
mgst1.1	1.208e-14	0.194791	0.312	0.124	1.80693e-10	3.1	mgst1.1
zgc:194655	1.51157e-14	0.135059	0.16	0.038	2.261e-10	3.1	zgc:194655
fstl1b	1.60347e-14	0.203335	0.27	0.099	2.39847e-10	3.1	fstl1b
gpx1a	1.66704e-14	0.162255	0.198	0.055	2.49355e-10	3.1	gpx1a
itm2cb	1.74383e-14	0.107143	0.063	0.004	2.60843e-10	3.1	itm2cb
ifi45	1.75178e-14	0.339755	0.565	0.299	2.62031e-10	3.1	ifi45
arpc4	1.81032e-14	0.15137	0.241	0.076	2.70787e-10	3.1	arpc4
ybx1	1.93789e-14	0.282939	0.97	0.872	2.89869e-10	3.1	ybx1
tmem30ab	2.25581e-14	0.252769	0.409	0.194	3.37425e-10	3.1	tmem30ab
rpl39	2.31896e-14	0.217219	1	0.998	3.4687e-10	3.1	rpl39
sarnp	2.521e-14	0.13805	0.173	0.044	3.77091e-10	3.1	sarnp
smim15	2.54268e-14	0.10493	0.127	0.024	3.80334e-10	3.1	smim15
tmem88b	2.78622e-14	0.142223	0.152	0.035	4.16762e-10	3.1	tmem88b
n4bp1	3.10209e-14	0.175317	0.245	0.084	4.6401e-10	3.1	n4bp1
si:ch211-286b5.5	3.17039e-14	0.222438	0.612	0.308	4.74227e-10	3.1	si:ch211-286b5.5
cct6a	3.25166e-14	0.227013	0.489	0.228	4.86384e-10	3.1	cct6a
eppk1	3.68358e-14	0.281764	0.46	0.24	5.5099e-10	3.1	eppk1
rpl11	4.02779e-14	0.183373	1	0.998	6.02477e-10	3.1	rpl11
si:ch73-335l21.41	4.14284e-14	0.44874	0.705	0.454	6.19686e-10	3.1	si:ch73-335l21.4
rsad2	5.28276e-14	0.41194	0.257	0.092	7.90196e-10	3.1	rsad2
axin2	7.2582e-14	0.201316	0.397	0.183	1.08568e-09	3.1	axin2
lgals9l3	8.49075e-14	0.206843	0.414	0.197	1.27005e-09	3.1	lgals9l3
fmnl2a	9.36096e-14	0.12825	0.194	0.057	1.40021e-09	3.1	fmnl2a
znfx1	9.66772e-14	0.114924	0.169	0.044	1.4461e-09	3.1	znfx1
plecb	9.93547e-14	0.184504	0.287	0.112	1.48615e-09	3.1	plecb
ptprsa.1	9.9732e-14	0.11797	0.177	0.049	1.49179e-09	3.1	ptprsa.1
CT956002.2	1.15357e-13	0.131796	0.203	0.061	1.72551e-09	3.1	CT956002.2
rps3a2	1.1685e-13	0.18006	1	0.998	1.74784e-09	3.1	rps3a
cpn1.1	1.25385e-13	0.12657	0.173	0.045	1.8755e-09	3.1	cpn1.1
si:ch1073-291c23.2	1.25464e-13	0.149407	0.16	0.041	1.87669e-09	3.1	si:ch1073-291c23.2
ldlrap1a	1.29654e-13	0.107298	0.169	0.043	1.93936e-09	3.1	ldlrap1a
sept7b	1.34225e-13	0.124938	0.194	0.055	2.00773e-09	3.1	sept7b
fmnl3	1.34409e-13	0.168584	0.283	0.109	2.0105e-09	3.1	fmnl3
pbxip1b	1.37562e-13	0.186093	0.274	0.101	2.05765e-09	3.1	pbxip1b
slc48a1b	1.3858e-13	0.123151	0.139	0.031	2.07287e-09	3.1	slc48a1b
ywhag1	2.05675e-13	0.144375	0.19	0.056	3.07649e-09	3.1	ywhag1
smox	2.6048e-13	0.14033	0.194	0.059	3.89627e-09	3.1	smox
fkbp1b1	2.90567e-13	0.26485	0.688	0.445	4.3463e-09	3.1	fkbp1b
zgc:152774	3.06034e-13	0.105016	0.127	0.027	4.57766e-09	3.1	zgc:152774
si:ch211-212k18.7	3.17603e-13	0.198131	0.498	0.236	4.75071e-09	3.1	si:ch211-212k18.7
nudcd2	3.29758e-13	0.151015	0.173	0.047	4.93252e-09	3.1	nudcd2
fblim1	3.39937e-13	0.178045	0.312	0.13	5.08477e-09	3.1	fblim1
pik3c2a	4.03722e-13	0.217166	0.43	0.214	6.03888e-09	3.1	pik3c2a
selenoh	4.51051e-13	0.167127	0.177	0.049	6.74682e-09	3.1	selenoh
flna	5.30544e-13	0.212828	0.367	0.157	7.93587e-09	3.1	flna
gatc	5.32224e-13	0.100615	0.127	0.027	7.96101e-09	3.1	gatc
atp2b4	5.34179e-13	0.197722	0.54	0.267	7.99026e-09	3.1	atp2b4
cct8	5.7541e-13	0.154021	0.228	0.076	8.60699e-09	3.1	cct8
fthl271	6.24423e-13	0.217445	0.979	0.865	9.34012e-09	3.1	fthl27
hmgb1a	7.59799e-13	0.212679	0.582	0.304	1.13651e-08	3.1	hmgb1a
celf2	8.3287e-13	0.141715	0.219	0.074	1.24581e-08	3.1	celf2
sh3gl3b	9.33308e-13	0.155471	0.363	0.151	1.39604e-08	3.1	sh3gl3b
faua2	9.38389e-13	0.187351	1	0.988	1.40364e-08	3.1	faua
eif5a	1.00568e-12	0.303722	0.641	0.363	1.5043e-08	3.1	eif5a
rrbp1a	1.03271e-12	0.14444	0.219	0.073	1.54473e-08	3.1	rrbp1a
mbd3a	1.16569e-12	0.112927	0.186	0.054	1.74363e-08	3.1	mbd3a
naca1	1.21534e-12	0.173157	1	0.983	1.8179e-08	3.1	naca
acsl1a	1.23582e-12	0.105149	0.097	0.017	1.84854e-08	3.1	acsl1a
ppid	1.3542e-12	0.117881	0.139	0.033	2.02561e-08	3.1	ppid
mcl1b	1.52452e-12	0.194372	0.574	0.297	2.28038e-08	3.1	mcl1b
huwe1	1.72371e-12	0.121918	0.203	0.063	2.57833e-08	3.1	huwe1
pabpc1a1	1.81566e-12	0.309585	0.802	0.568	2.71586e-08	3.1	pabpc1a
ssr2	1.92649e-12	0.205896	0.557	0.283	2.88165e-08	3.1	ssr2
tmsb	2.10016e-12	0.144993	0.11	0.022	3.14142e-08	3.1	tmsb
fgfr4	2.11646e-12	0.120173	0.333	0.135	3.1658e-08	3.1	fgfr4
cct2.1	2.13242e-12	0.195468	0.477	0.231	3.18967e-08	3.1	cct2.1
boc	2.41357e-12	0.17856	0.27	0.109	3.61021e-08	3.1	boc
ist1	2.54346e-12	0.103433	0.152	0.039	3.80451e-08	3.1	ist1
plekhg2	2.55873e-12	0.113029	0.181	0.055	3.82735e-08	3.1	plekhg2
ube2e3	2.59927e-12	0.193813	0.646	0.343	3.88798e-08	3.1	ube2e3
CABZ01087560.1	2.6964e-12	0.117439	0.245	0.085	4.03328e-08	3.1	CABZ01087560.1
arpc1b	2.81991e-12	0.104152	0.135	0.032	4.21802e-08	3.1	arpc1b
zfp36l1b	3.12545e-12	0.267466	0.662	0.391	4.67504e-08	3.1	zfp36l1b
zgc:92818	3.31454e-12	0.117439	0.211	0.068	4.95789e-08	3.1	zgc:92818
tfe3a	4.05613e-12	0.164031	0.308	0.133	6.06716e-08	3.1	tfe3a
tmem256	4.51516e-12	0.162962	0.321	0.133	6.75377e-08	3.1	tmem256
eif3i	5.10669e-12	0.163972	0.354	0.152	7.63859e-08	3.1	eif3i
ugt1b5	5.22566e-12	0.118308	0.181	0.056	7.81655e-08	3.1	ugt1b5
si:ch73-46j18.5	6.41011e-12	0.241668	0.498	0.263	9.58825e-08	3.1	si:ch73-46j18.5
BX000534.1	6.99813e-12	0.140834	0.122	0.028	1.04678e-07	3.1	BX000534.1
pdgfd	7.15597e-12	0.127769	0.173	0.053	1.07039e-07	3.1	pdgfd
smdt1b	7.46134e-12	0.137244	0.215	0.072	1.11607e-07	3.1	smdt1b
hoxd9a	7.98149e-12	0.106166	0.127	0.03	1.19387e-07	3.1	hoxd9a
ucp2	9.53992e-12	0.131903	0.181	0.055	1.42698e-07	3.1	ucp2
spred2b	9.67182e-12	0.107755	0.16	0.046	1.44671e-07	3.1	spred2b
tgm1l1	1.10202e-11	0.127283	0.198	0.067	1.6484e-07	3.1	tgm1l1
ak1	1.13399e-11	0.145267	0.177	0.055	1.69622e-07	3.1	ak1
sema6d	1.18781e-11	0.101201	0.152	0.042	1.77672e-07	3.1	sema6d
cib1	1.22013e-11	0.101454	0.181	0.055	1.82507e-07	3.1	cib1
mical3b	1.29643e-11	0.115896	0.181	0.058	1.93921e-07	3.1	mical3b
rnd3b	1.48764e-11	0.103397	0.181	0.057	2.22521e-07	3.1	rnd3b
nr0b1	1.67523e-11	0.148203	0.245	0.093	2.50581e-07	3.1	nr0b1
eif3f1	1.71407e-11	0.252427	0.84	0.609	2.56391e-07	3.1	eif3f
eif3ea	1.91126e-11	0.25268	0.684	0.404	2.85887e-07	3.1	eif3ea
rsl1d1	2.14688e-11	0.172747	0.384	0.176	3.2113e-07	3.1	rsl1d1
ssr3	2.63273e-11	0.2287	0.637	0.362	3.93804e-07	3.1	ssr3
eif3c	2.68215e-11	0.147305	0.426	0.198	4.01196e-07	3.1	eif3c
sorl1	2.86144e-11	0.137391	0.266	0.109	4.28014e-07	3.1	sorl1
vgll4b	3.06814e-11	0.128333	0.228	0.086	4.58932e-07	3.1	vgll4b
srgap2	3.94522e-11	0.155227	0.3	0.133	5.90126e-07	3.1	srgap2
p4hb	4.18179e-11	0.133805	0.211	0.072	6.25512e-07	3.1	p4hb
zgc:153867	4.18476e-11	0.281354	0.823	0.558	6.25957e-07	3.1	zgc:153867
rps171	4.45754e-11	0.285517	0.869	0.632	6.66759e-07	3.1	rps17
eef1a1l2	4.6682e-11	0.124036	1	1	6.98269e-07	3.1	eef1a1l2
ddx39aa	5.21523e-11	0.135136	0.241	0.089	7.80095e-07	3.1	ddx39aa
chmp5b	6.21551e-11	0.144239	0.287	0.117	9.29716e-07	3.1	chmp5b
tspan3a	7.98094e-11	0.166539	0.443	0.217	1.19379e-06	3.1	tspan3a
sptan1	8.24454e-11	0.156229	0.249	0.097	1.23322e-06	3.1	sptan1
srrm1	8.55844e-11	0.182526	0.426	0.209	1.28017e-06	3.1	srrm1
ywhaqa	8.77871e-11	0.235732	0.532	0.29	1.31312e-06	3.1	ywhaqa
rpl26	8.87741e-11	0.178926	0.278	0.118	1.32788e-06	3.1	rpl26
syne2b	9.27001e-11	0.115452	0.169	0.054	1.38661e-06	3.1	syne2b
mgst3b	1.07365e-10	0.239866	0.759	0.48	1.60597e-06	3.1	mgst3b
ddx6	1.17238e-10	0.15009	0.266	0.104	1.75365e-06	3.1	ddx6
CU984600.2	1.22952e-10	0.177182	0.241	0.096	1.83912e-06	3.1	CU984600.2
plscr3b	1.45725e-10	0.123933	0.224	0.082	2.17975e-06	3.1	plscr3b
zgc:56304	1.71391e-10	0.114108	0.232	0.086	2.56367e-06	3.1	zgc:56304
gstr	1.73917e-10	0.208283	0.57	0.313	2.60145e-06	3.1	gstr
krtcap2	1.87056e-10	0.183767	0.397	0.193	2.79798e-06	3.1	krtcap2
adh8b	1.95412e-10	0.169447	0.207	0.078	2.92297e-06	3.1	adh8b
ciarta	1.97885e-10	0.139072	0.274	0.113	2.95997e-06	3.1	ciarta
ptmab	2.01105e-10	0.263175	0.722	0.458	3.00813e-06	3.1	ptmab
bsg	2.06532e-10	0.221464	0.654	0.374	3.0893e-06	3.1	bsg
pbx4	2.31555e-10	0.171698	0.376	0.179	3.4636e-06	3.1	pbx4
zgc:113208	2.70215e-10	0.119742	0.19	0.068	4.04187e-06	3.1	zgc:113208
syf2	2.79608e-10	0.143469	0.397	0.191	4.18237e-06	3.1	syf2
mxi1	2.88432e-10	0.118198	0.207	0.078	4.31436e-06	3.1	mxi1
arap3	3.02891e-10	0.101878	0.131	0.037	4.53064e-06	3.1	arap3
fam133b	3.33963e-10	0.143299	0.241	0.095	4.99543e-06	3.1	fam133b
med19a	3.33996e-10	0.101981	0.169	0.054	4.99591e-06	3.1	med19a
smc3	3.39987e-10	0.10392	0.156	0.048	5.08553e-06	3.1	smc3
kdm1a	3.4741e-10	0.106804	0.16	0.05	5.19656e-06	3.1	kdm1a
prkd2	3.56196e-10	0.132871	0.27	0.117	5.32798e-06	3.1	prkd2
srsf7a	3.78024e-10	0.130463	0.295	0.124	5.65448e-06	3.1	srsf7a
grb2b	4.59247e-10	0.10428	0.181	0.061	6.86942e-06	3.1	grb2b
capns1b	4.63642e-10	0.193507	0.586	0.325	6.93516e-06	3.1	capns1b
dpyda.1	4.85776e-10	0.117782	0.203	0.076	7.26624e-06	3.1	dpyda.1
usp6nl	5.01769e-10	0.155415	0.232	0.097	7.50547e-06	3.1	usp6nl
cbr1l	5.20581e-10	0.113562	0.143	0.043	7.78685e-06	3.1	cbr1l
nenf	6.05272e-10	0.103734	0.169	0.055	9.05365e-06	3.1	nenf
zgc:152658	7.56502e-10	0.111754	0.165	0.055	1.13158e-05	3.1	zgc:152658
gtf2f1	8.18012e-10	0.100355	0.148	0.045	1.22358e-05	3.1	gtf2f1
gpd1c	8.71985e-10	0.104034	0.169	0.058	1.30432e-05	3.1	gpd1c
ube2ib	9.28704e-10	0.108246	0.287	0.122	1.38916e-05	3.1	ube2ib
cd63	9.76978e-10	0.177653	0.684	0.414	1.46136e-05	3.1	cd63
pabpn1	1.11471e-09	0.207849	0.536	0.302	1.66739e-05	3.1	pabpn1
cirbpb	1.22334e-09	0.292879	0.831	0.64	1.82988e-05	3.1	cirbpb
akt1s1	1.30656e-09	0.122064	0.253	0.105	1.95435e-05	3.1	akt1s1
scarb2a	1.33498e-09	0.148419	0.3	0.142	1.99686e-05	3.1	scarb2a
ube2l3a	1.39683e-09	0.106508	0.224	0.086	2.08938e-05	3.1	ube2l3a
meaf6	1.46281e-09	0.107572	0.228	0.089	2.18808e-05	3.1	meaf6
tjp2b1	1.47648e-09	0.16062	0.35	0.167	2.20852e-05	3.1	tjp2b
timp2a1	1.6543e-09	0.140289	0.447	0.225	2.4745e-05	3.1	timp2a
sri	1.88222e-09	0.128438	0.329	0.151	2.81543e-05	3.1	sri
btf31	2.11155e-09	0.246289	0.92	0.766	3.15846e-05	3.1	btf3
shc1	2.2751e-09	0.141166	0.266	0.122	3.40309e-05	3.1	shc1
zgc:163098	2.35529e-09	0.105751	0.173	0.062	3.52304e-05	3.1	zgc:163098
vps35	2.51815e-09	0.102282	0.207	0.079	3.76665e-05	3.1	vps35
trappc1	2.54513e-09	0.135128	0.224	0.09	3.807e-05	3.1	trappc1
polr2f	2.82243e-09	0.106822	0.186	0.067	4.22178e-05	3.1	polr2f
ctnnb2	3.07752e-09	0.151736	0.325	0.154	4.60335e-05	3.1	ctnnb2
rplp12	3.09216e-09	0.147991	1	0.998	4.62525e-05	3.1	rplp1
arhgdia	3.59911e-09	0.132911	0.312	0.144	5.38355e-05	3.1	arhgdia
stat1b	3.8225e-09	0.144392	0.262	0.117	5.7177e-05	3.1	stat1b
nr5a1b	5.28089e-09	0.109656	0.169	0.061	7.89915e-05	3.1	nr5a1b
myl9b1	5.45616e-09	0.135822	0.565	0.309	8.16133e-05	3.1	myl9b
rnf213a	5.69213e-09	0.161384	0.637	0.383	8.51429e-05	3.1	rnf213a
pfdn4	5.95629e-09	0.125551	0.181	0.067	8.90942e-05	3.1	pfdn4
eif3k	5.99391e-09	0.138754	0.456	0.238	8.96569e-05	3.1	eif3k
eif3ha	6.07842e-09	0.172235	0.468	0.255	9.0921e-05	3.1	eif3ha
rbbp6	6.16385e-09	0.106626	0.316	0.146	9.21989e-05	3.1	rbbp6
lrch4	6.54607e-09	0.113634	0.152	0.053	9.79162e-05	3.1	lrch4
mtap	7.33979e-09	0.126599	0.198	0.077	0.000109789	3.1	mtap
eif3m1	7.7318e-09	0.224121	0.722	0.45	0.000115652	3.1	eif3m
tgif1	8.03018e-09	0.123522	0.418	0.213	0.000120115	3.1	tgif1
rps52	8.16962e-09	0.134101	1	0.997	0.000122201	3.1	rps5
uchl1	8.50205e-09	0.13266	0.131	0.04	0.000127174	3.1	uchl1
bcl2l10	9.18012e-09	0.108478	0.181	0.067	0.000137316	3.1	bcl2l10
nsa2	9.69854e-09	0.245421	0.734	0.486	0.000145071	3.1	nsa2
pcf11	9.83637e-09	0.118284	0.241	0.102	0.000147132	3.1	pcf11
cbx7a	1.28305e-08	0.125288	0.253	0.11	0.000191919	3.1	cbx7a
hmgn7	1.41433e-08	0.227717	0.793	0.527	0.000211555	3.1	hmgn7
calm2a	1.59034e-08	0.173085	0.333	0.167	0.000237884	3.1	calm2a
si:dkey-180p18.9	1.75136e-08	0.125476	0.325	0.158	0.000261968	3.1	si:dkey-180p18.9
hist2h2l	1.77914e-08	0.140561	0.46	0.253	0.000266124	3.1	hist2h2l
akap8l	1.83417e-08	0.106209	0.186	0.07	0.000274356	3.1	akap8l
cast	1.84939e-08	0.124445	0.3	0.14	0.000276632	3.1	cast
myo1ca	2.08892e-08	0.128277	0.266	0.127	0.00031246	3.1	myo1ca
arpc3	2.11897e-08	0.153492	0.451	0.249	0.000316955	3.1	arpc3
b2ml	2.25022e-08	0.16977	0.979	0.936	0.000336588	3.1	b2ml
ube2na	2.84902e-08	0.110404	0.203	0.081	0.000426156	3.1	ube2na
kdm6bb	2.95281e-08	0.122266	0.266	0.128	0.000441682	3.1	kdm6bb
dctn3	3.12159e-08	0.114512	0.266	0.12	0.000466927	3.1	dctn3
dut	3.36773e-08	0.116392	0.084	0.02	0.000503745	3.1	dut
cox6a2	4.01745e-08	0.18552	0.62	0.381	0.00060093	3.1	cox6a2
cadm4	4.04102e-08	0.10528	0.198	0.083	0.000604455	3.1	cadm4
cnp	4.81837e-08	0.175618	0.494	0.277	0.000720731	3.1	cnp
rab11fip4b	5.20417e-08	0.128162	0.262	0.127	0.00077844	3.1	rab11fip4b
dusp8a	5.3209e-08	0.102663	0.169	0.066	0.0007959	3.1	dusp8a
egr4	5.86923e-08	0.221952	0.084	0.02	0.000877919	3.1	egr4
itga6b	6.44832e-08	0.142052	0.232	0.11	0.00096454	3.1	itga6b
naa10	6.54472e-08	0.108093	0.253	0.116	0.00097896	3.1	naa10
gabarapl2	6.61692e-08	0.105854	0.308	0.15	0.000989758	3.1	gabarapl2
actb2	9.4276e-08	0.19564	0.996	0.991	0.00141018	3.1	actb2
ftr14	1.17727e-07	0.121629	0.19	0.082	0.00176096	3.1	ftr14
snrpf	1.23566e-07	0.173667	0.346	0.183	0.0018483	3.1	snrpf
ier51	1.37801e-07	0.259128	0.734	0.562	0.00206123	3.1	ier5
rpl291	1.47311e-07	0.221358	0.937	0.766	0.00220347	3.1	rpl29
tpm3	1.56182e-07	0.162963	0.582	0.348	0.00233616	3.1	tpm3
zbtb4	1.67417e-07	0.144082	0.316	0.174	0.00250422	3.1	zbtb4
calr	1.72409e-07	0.112859	0.198	0.088	0.00257889	3.1	calr
fosb2	1.74234e-07	0.267165	0.89	0.832	0.0026062	3.1	fosb
ctnnd1	1.79714e-07	0.131855	0.325	0.165	0.00268816	3.1	ctnnd1
eif3g	2.12328e-07	0.17905	0.667	0.445	0.003176	3.1	eif3g
rap1b	2.39622e-07	0.120991	0.266	0.13	0.00358426	3.1	rap1b
lhfpl2a	2.44207e-07	0.10853	0.232	0.111	0.00365286	3.1	lhfpl2a
irs1	2.9406e-07	0.14161	0.329	0.187	0.00439856	3.1	irs1
arrdc3b	3.20612e-07	0.111487	0.203	0.089	0.00479572	3.1	arrdc3b
vamp3	3.92851e-07	0.1476	0.574	0.35	0.00587627	3.1	vamp3
sub1a	4.30849e-07	0.142581	0.477	0.272	0.00644464	3.1	sub1a
tmem50a	4.50437e-07	0.10097	0.392	0.211	0.00673764	3.1	tmem50a
pin1	4.56491e-07	0.10118	0.249	0.117	0.00682819	3.1	pin1
acin1a	4.91417e-07	0.150685	0.485	0.284	0.00735062	3.1	acin1a
pdlim1	5.05466e-07	0.108255	0.283	0.14	0.00756076	3.1	pdlim1
mhc1zba	5.08312e-07	0.170223	0.911	0.78	0.00760333	3.1	mhc1zba
foxj3	5.41609e-07	0.126378	0.249	0.127	0.00810138	3.1	foxj3
ppp1r10	5.53455e-07	0.139235	0.249	0.127	0.00827858	3.1	ppp1r10
aplp2	5.59618e-07	0.142205	0.561	0.34	0.00837077	3.1	aplp2
GCA	5.60737e-07	0.106586	0.308	0.158	0.00838751	3.1	GCA
vat11	5.86087e-07	0.208938	0.54	0.336	0.00876669	3.1	vat1
ralab	5.97576e-07	0.121836	0.409	0.245	0.00893855	3.1	ralab
egr11	6.17096e-07	0.312433	0.747	0.657	0.00923053	3.1	egr1
si:ch73-380l3.4	6.60375e-07	0.144502	0.278	0.152	0.00987789	3.1	si:ch73-380l3.4
prpf6	7.27421e-07	0.127395	0.194	0.09	0.0108808	3.1	prpf6
slka	8.59908e-07	0.175002	0.304	0.179	0.0128625	3.1	slka
xaf1	9.13777e-07	0.152434	0.308	0.174	0.0136683	3.1	xaf1
jdp2b2	1.10743e-06	0.28001	0.899	0.824	0.016565	3.1	jdp2b
grb10b	1.2406e-06	0.116714	0.236	0.121	0.0185569	3.1	grb10b
mibp21	1.26863e-06	0.17741	0.591	0.364	0.0189762	3.1	mibp2
col1a1b	1.39245e-06	0.110738	0.093	0.029	0.0208283	3.1	col1a1b
grb10a	1.42401e-06	0.117287	0.329	0.189	0.0213003	3.1	grb10a
rnf213b	1.5421e-06	0.116252	0.274	0.147	0.0230667	3.1	rnf213b
nfkb2	1.91021e-06	0.116381	0.198	0.094	0.028573	3.1	nfkb2
nid1b	1.95401e-06	0.118858	0.08	0.023	0.0292281	3.1	nid1b
trim105	1.96896e-06	0.100159	0.207	0.101	0.0294517	3.1	trim105
pcna	2.00493e-06	0.13611	0.093	0.029	0.0299898	3.1	pcna
tax1bp3	2.32699e-06	0.103246	0.207	0.099	0.0348071	3.1	tax1bp3
dusp51	2.33917e-06	0.131552	0.139	0.055	0.0349893	3.1	dusp5
eif3d	3.84464e-06	0.137035	0.591	0.375	0.0575081	3.1	eif3d
dusp6	5.20089e-06	0.132282	0.245	0.131	0.0777949	3.1	dusp6
vamp8	5.97373e-06	0.104018	0.219	0.115	0.089355	3.1	vamp8
si:ch211-288g17.3	6.19537e-06	0.159991	0.405	0.247	0.0926704	3.1	si:ch211-288g17.3
ccng1	6.42635e-06	0.159912	0.608	0.395	0.0961254	3.1	ccng1
cirbpa1	6.90845e-06	0.153844	0.616	0.379	0.103337	3.1	cirbpa
fubp1	7.38136e-06	0.111186	0.224	0.113	0.11041	3.1	fubp1
znf706	1.02035e-05	0.114196	0.325	0.183	0.152625	3.1	znf706
txndc9	1.37739e-05	0.11225	0.224	0.116	0.206031	3.1	txndc9
lsp1	1.40764e-05	0.123372	0.363	0.231	0.210555	3.1	lsp1
eif2s31	1.41085e-05	0.102977	0.489	0.303	0.211035	3.1	eif2s3
CU104709.1	1.43094e-05	0.116177	0.241	0.134	0.214041	3.1	CU104709.1
ahr2	1.54006e-05	0.109028	0.249	0.141	0.230362	3.1	ahr2
rsrp11	1.62431e-05	0.164631	0.612	0.441	0.242965	3.1	rsrp1
fkbp1aa	1.84288e-05	0.166556	0.684	0.475	0.275658	3.1	fkbp1aa
eif3ba1	2.56014e-05	0.111597	0.451	0.285	0.382946	3.1	eif3ba
wu:fj29h11	2.68133e-05	0.142598	0.304	0.184	0.401073	3.1	wu:fj29h11
auts2a	5.08173e-05	0.110123	0.287	0.179	0.760125	3.1	auts2a
cebpb2	5.94123e-05	0.223161	0.662	0.537	0.888689	3.1	cebpb
btg11	6.32363e-05	0.137356	0.848	0.689	0.945888	3.1	btg1
rpl5a1	6.89933e-05	0.176896	0.869	0.728	1	3.1	rpl5a
isg15	7.30103e-05	0.121119	0.616	0.451	1	3.1	isg15
arhgef1b	0.000169258	0.133884	0.371	0.259	1	3.1	arhgef1b
si:ch211-39k3.2	0.000215411	0.10858	0.236	0.145	1	3.1	si:ch211-39k3.2
zgc:195173	0.000215722	0.135019	0.392	0.279	1	3.1	zgc:195173
atp6v0e1	0.00022733	0.106642	0.751	0.527	1	3.1	atp6v0e1
pde4ba	0.000243385	0.152661	0.722	0.591	1	3.1	pde4ba
hnrnpa0a	0.000271173	0.114187	0.262	0.166	1	3.1	hnrnpa0a
h1f0	0.000310024	0.154379	0.768	0.606	1	3.1	h1f0
rnd1b	0.000807938	0.103115	0.203	0.124	1	3.1	rnd1b
hsp90aa1.22	0.000947391	0.229362	0.709	0.63	1	3.1	hsp90aa1.2
si:dkey-241l7.4	0.00145277	0.142931	0.068	0.028	1	3.1	si:dkey-241l7.4
nme2b.11	0.0016218	0.109953	0.987	0.981	1	3.1	nme2b.1
jund1	0.00200462	0.107479	0.637	0.507	1	3.1	jund
si:dkey-37o8.1	0.00263836	0.125709	0.068	0.029	1	3.1	si:dkey-37o8.1
org	0.0059491	0.106746	0.097	0.051	1	3.1	org
ier2b2	0.00833404	0.116285	0.802	0.735	1	3.1	ier2b
fgfr41	8.23275e-189	1.43338	0.849	0.075	1.23145e-184	3.2	fgfr4
pcolceb	6.48011e-163	1.20106	0.724	0.054	9.69295e-159	3.2	pcolceb
fgfr31	2.07763e-124	1.19593	0.744	0.102	3.10772e-120	3.2	fgfr3
fat2	3.3843e-101	0.607622	0.472	0.035	5.06224e-97	3.2	fat2
cdh41	3.68565e-90	0.911259	0.709	0.13	5.513e-86	3.2	cdh4
fhl1b	2.61136e-88	0.622385	0.503	0.056	3.90608e-84	3.2	fhl1b
gstm.3	4.97695e-82	1.27364	0.714	0.168	7.44452e-78	3.2	gstm.3
etv4	1.96607e-78	0.371073	0.327	0.017	2.94085e-74	3.2	etv4
bmp6	8.12664e-68	0.642194	0.462	0.064	1.21558e-63	3.2	bmp6
ace1	1.79906e-67	0.540461	0.447	0.059	2.69104e-63	3.2	ace
krt941	1.40754e-66	1.11739	0.628	0.141	2.10539e-62	3.2	krt94
fgfrl1a1	5.63814e-63	0.481392	0.427	0.058	8.43353e-59	3.2	fgfrl1a
inka1a	1.39005e-62	0.439386	0.342	0.033	2.07923e-58	3.2	inka1a
spry4	8.03396e-62	0.451739	0.307	0.024	1.20172e-57	3.2	spry4
hpn1	6.86574e-59	0.614679	0.593	0.139	1.02698e-54	3.2	hpn
zgc:928181	2.25711e-58	0.5965	0.382	0.05	3.37619e-54	3.2	zgc:92818
slc4a4a1	5.37666e-57	0.674997	0.683	0.159	8.04241e-53	3.2	slc4a4a
rpz5	4.54289e-55	0.771137	1	0.937	6.79526e-51	3.2	rpz5
emilin1a1	7.97934e-55	0.684842	0.693	0.204	1.19355e-50	3.2	emilin1a
zgc:1141811	2.85058e-50	0.694212	0.749	0.246	4.26389e-46	3.2	zgc:114181
zgc:171686	5.38615e-49	0.238208	0.221	0.014	8.0566e-45	3.2	zgc:171686
si:ch73-335l21.42	2.496e-47	1.19464	0.894	0.436	3.73351e-43	3.2	si:ch73-335l21.4
mxra8a1	1.586e-44	0.568621	0.452	0.101	2.37233e-40	3.2	mxra8a
gsdf2	2.30816e-44	0.780775	1	0.953	3.45254e-40	3.2	gsdf
prdx51	4.08273e-44	0.868837	0.633	0.232	6.10695e-40	3.2	prdx5
midn1	4.71384e-43	1.09447	0.598	0.201	7.05096e-39	3.2	midn
ndrg3a	8.65587e-43	0.64685	0.528	0.16	1.29475e-38	3.2	ndrg3a
hbegfb	1.63678e-42	0.293282	0.251	0.026	2.44829e-38	3.2	hbegfb
s100a10b1	2.2987e-41	0.835576	0.94	0.604	3.4384e-37	3.2	s100a10b
nr0b11	3.12667e-41	0.450472	0.392	0.078	4.67687e-37	3.2	nr0b1
nfe2l2a	3.87451e-39	0.606002	0.487	0.138	5.79549e-35	3.2	nfe2l2a
nr5a1b1	1.09789e-38	0.34069	0.302	0.047	1.64222e-34	3.2	nr5a1b
lrrc17	4.04972e-38	0.261336	0.246	0.029	6.05757e-34	3.2	lrrc17
mafa	7.92597e-38	0.180298	0.171	0.011	1.18557e-33	3.2	mafa
parvab	1.79984e-37	0.305707	0.291	0.046	2.6922e-33	3.2	parvab
gpr22a	2.8221e-37	0.221226	0.186	0.014	4.2213e-33	3.2	gpr22a
cfl1l1	7.72475e-37	0.613899	0.573	0.159	1.15547e-32	3.2	cfl1l
cldnc1	8.23232e-37	0.429939	0.392	0.086	1.23139e-32	3.2	cldnc
[truncated: 1,179 more rows]

## Sheet: Pre-follicle Cell  SC3.1
	p_val	avg_logFC	pct.1	pct.2	p_val_adj	cluster	gene
krt4	1.93858e-266	1.66931	0.785	0.013	2.89973e-262	3.1	krt4
zgc:153311	1.39544e-255	1.46245	0.878	0.042	2.08731e-251	3.1	zgc:153311
icn	1.14149e-233	2.09401	0.97	0.095	1.70745e-229	3.1	icn
ndrg1a	3.51681e-222	1.20278	0.717	0.02	5.26044e-218	3.1	ndrg1a
fn1b	7.52783e-219	1.14029	0.705	0.02	1.12601e-214	3.1	fn1b
dkk3b	3.62516e-215	0.976513	0.675	0.016	5.42251e-211	3.1	dkk3b
csf1a	2.61764e-207	0.731386	0.595	0.005	3.91546e-203	3.1	csf1a
ucmaa	7.52455e-206	0.932784	0.629	0.012	1.12552e-201	3.1	ucmaa
cfl1l	2.19186e-204	1.70307	0.911	0.097	3.27858e-200	3.1	cfl1l
nog3	2.58846e-204	0.893273	0.658	0.018	3.87182e-200	3.1	nog3
nog1	3.98119e-203	1.69422	0.743	0.04	5.95507e-199	3.1	nog1
lhx9	6.07991e-198	1.18447	0.861	0.082	9.09433e-194	3.1	lhx9
slc4a4a	7.59802e-191	1.47695	0.92	0.111	1.13651e-186	3.1	slc4a4a
si:ch211-105c13.3	1.83049e-190	0.984885	0.738	0.046	2.73804e-186	3.1	si:ch211-105c13.3
gpm6ab	1.85766e-190	0.735676	0.629	0.019	2.77868e-186	3.1	gpm6ab
anxa1a	1.88217e-182	1.34169	0.755	0.057	2.81534e-178	3.1	anxa1a
tmeff1b	6.79457e-181	0.869359	0.734	0.05	1.01633e-176	3.1	tmeff1b
cahz	1.47182e-180	1.72247	0.861	0.11	2.20155e-176	3.1	cahz
fam84a	3.89575e-177	0.736686	0.616	0.023	5.82726e-173	3.1	fam84a
slc12a7b	3.859e-165	0.93599	0.785	0.085	5.7723e-161	3.1	slc12a7b
bnc2	5.99294e-164	0.77009	0.709	0.057	8.96424e-160	3.1	bnc2
id2a	8.713e-164	1.47834	0.819	0.101	1.30329e-159	3.1	id2a
jam2b	7.00147e-161	0.725307	0.464	0.003	1.04728e-156	3.1	jam2b
camta1a	7.46546e-161	0.533731	0.485	0.006	1.11668e-156	3.1	camta1a
ehd2b	1.53635e-159	1.14222	0.814	0.104	2.29807e-155	3.1	ehd2b
krt18b	5.22631e-157	1.07531	0.776	0.078	7.81751e-153	3.1	krt18b
hsd11b2	6.60617e-156	1.30632	0.696	0.064	9.88151e-152	3.1	hsd11b2
rab6ba	3.75868e-151	0.638356	0.616	0.039	5.62223e-147	3.1	rab6ba
spaca4l	5.68972e-145	0.722761	0.439	0.006	8.51068e-141	3.1	spaca4l
tmem98	7.49574e-145	0.46463	0.464	0.01	1.12121e-140	3.1	tmem98
cotl1	3.0247e-143	0.811366	0.565	0.031	4.52435e-139	3.1	cotl1
ackr3b	7.10486e-140	1.12056	0.848	0.147	1.06274e-135	3.1	ackr3b
irx3a	1.22916e-137	0.781455	0.755	0.093	1.83857e-133	3.1	irx3a
si:ch211-207d6.2	3.37606e-136	0.719388	0.7	0.075	5.04991e-132	3.1	si:ch211-207d6.2
si:ch211-222l21.1	2.02661e-135	1.38984	0.852	0.16	3.0314e-131	3.1	si:ch211-222l21.1
nat8l	1.10896e-132	0.792401	0.595	0.049	1.65879e-128	3.1	nat8l
cxcl20	2.21153e-132	0.530241	0.439	0.011	3.30801e-128	3.1	cxcl20
col1a1a	7.70228e-131	0.594724	0.426	0.01	1.15211e-126	3.1	col1a1a
tdrd1	6.20141e-126	0.709499	0.426	0.012	9.27606e-122	3.1	tdrd1
zgc:114181	1.52624e-125	1.10334	0.899	0.211	2.28295e-121	3.1	zgc:114181
kcnip1b	4.09351e-125	0.382851	0.384	0.005	6.12307e-121	3.1	kcnip1b
pleca	1.33624e-124	0.785833	0.684	0.088	1.99875e-120	3.1	pleca
ftr82	4.07372e-124	0.59501	0.612	0.058	6.09347e-120	3.1	ftr82
afap1l1a	7.63619e-124	0.579509	0.582	0.05	1.14222e-119	3.1	afap1l1a
si:ch211-66e2.3	8.87917e-123	0.518243	0.388	0.007	1.32815e-118	3.1	si:ch211-66e2.3
epcam	1.41176e-122	1.22057	0.591	0.053	2.11171e-118	3.1	epcam
zgc:110182	1.85169e-119	0.962452	0.726	0.112	2.76976e-115	3.1	zgc:110182
ppdpfb	1.53297e-117	1.19386	0.823	0.174	2.29302e-113	3.1	ppdpfb
arvcfb	7.16967e-116	0.478727	0.489	0.031	1.07244e-111	3.1	arvcfb
krt15	2.93872e-114	0.843364	0.409	0.015	4.39574e-110	3.1	krt15
sox4a.1	7.90575e-114	0.74248	0.464	0.026	1.18254e-109	3.1	sox4a.1
nkd1	6.79715e-112	0.640902	0.637	0.081	1.01672e-107	3.1	nkd1
col27a1b	2.32257e-109	0.449689	0.447	0.026	3.4741e-105	3.1	col27a1b
lef1	2.80294e-109	0.516098	0.536	0.049	4.19263e-105	3.1	lef1
krt94	1.51973e-108	0.981963	0.734	0.113	2.27321e-104	3.1	krt94
tnfrsf9a	4.96762e-107	0.743005	0.414	0.02	7.43056e-103	3.1	tnfrsf9a
col6a1	1.32624e-106	0.690913	0.397	0.017	1.98379e-102	3.1	col6a1
irx5a	5.93977e-106	0.608916	0.667	0.095	8.88471e-102	3.1	irx5a
rbpms2a	6.69016e-106	0.514051	0.43	0.024	1.00071e-101	3.1	rbpms2a
si:dkey-28b4.7	1.32871e-105	0.778152	0.646	0.092	1.98749e-101	3.1	si:dkey-28b4.7
kctd12.2	1.59317e-105	0.930443	0.738	0.149	2.38306e-101	3.1	kctd12.2
hsbp1a	3.42378e-102	0.827399	0.747	0.155	5.12129e-98	3.1	hsbp1a
podxl	2.75805e-101	0.934011	0.527	0.056	4.12549e-97	3.1	podxl
si:dkey-188i13.6	8.24594e-101	0.924268	0.679	0.115	1.23343e-96	3.1	si:dkey-188i13.6
fstl3	6.94293e-100	1.05297	0.747	0.15	1.03852e-95	3.1	fstl3
frzb	1.66095e-99	0.391386	0.325	0.007	2.48444e-95	3.1	frzb
si:ch211-207i1.2	2.36679e-98	0.448318	0.422	0.028	3.54024e-94	3.1	si:ch211-207i1.2
CU468917.1	2.64323e-98	0.603006	0.489	0.046	3.95375e-94	3.1	CU468917.1
net1	5.96383e-98	1.07871	0.764	0.186	8.9207e-94	3.1	net1
cyp26a1	3.15201e-96	0.709001	0.409	0.027	4.71478e-92	3.1	cyp26a1
hbegfa	1.3906e-95	0.915483	0.62	0.094	2.08007e-91	3.1	hbegfa
CABZ01092746.1	7.72813e-95	0.365559	0.312	0.007	1.15597e-90	3.1	CABZ01092746.1
fxyd1	8.35588e-95	0.634031	0.523	0.061	1.24987e-90	3.1	fxyd1
sox6	1.06044e-94	0.708327	0.633	0.11	1.5862e-90	3.1	sox6
atoh8	2.86342e-93	0.535928	0.523	0.06	4.28311e-89	3.1	atoh8
six2a	5.98489e-93	0.299545	0.287	0.004	8.9522e-89	3.1	six2a
lrrn1	2.81319e-91	0.347934	0.342	0.014	4.20797e-87	3.1	lrrn1
s100a10b	2.10019e-90	1.1338	0.987	0.589	3.14146e-86	3.1	s100a10b
spint1a	2.36814e-87	0.345204	0.316	0.011	3.54226e-83	3.1	spint1a
gcga	7.06923e-87	0.689064	0.274	0.004	1.05742e-82	3.1	gcga
emilin1a	3.65657e-86	0.711792	0.755	0.183	5.4695e-82	3.1	emilin1a
col4a1	7.46554e-84	0.418888	0.443	0.045	1.1167e-79	3.1	col4a1
rbfox1	5.61084e-83	0.332812	0.346	0.02	8.3927e-79	3.1	rbfox1
neurl1b	3.17649e-82	0.320418	0.338	0.019	4.7514e-78	3.1	neurl1b
cd151	1.03672e-81	0.430894	0.346	0.021	1.55072e-77	3.1	cd151
ccn2a	2.15426e-81	1.12886	0.464	0.054	3.22234e-77	3.1	ccn2a
cdh4	5.62247e-81	0.647297	0.658	0.124	8.4101e-77	3.1	cdh4
rpl23	2.20624e-79	0.496181	1	0.992	3.30009e-75	3.1	rpl23
c1qtnf12	3.48485e-79	0.24577	0.241	0.003	5.21263e-75	3.1	c1qtnf12
postnb	3.1168e-78	0.335056	0.278	0.009	4.66211e-74	3.1	postnb
nfkbiaa	2.13766e-77	1.19695	0.57	0.101	3.19751e-73	3.1	nfkbiaa
elovl1b	3.01473e-77	0.544994	0.532	0.08	4.50944e-73	3.1	elovl1b
ms4a17a.5	2.5329e-76	0.320009	0.346	0.024	3.78872e-72	3.1	ms4a17a.5
zfp36l2	8.04106e-76	0.542377	0.418	0.045	1.20278e-71	3.1	zfp36l2
ppiaa	2.01101e-75	0.819442	0.975	0.616	3.00806e-71	3.1	ppiaa
hoxb7a	2.72799e-75	0.274955	0.312	0.017	4.08053e-71	3.1	hoxb7a
spint2	2.75488e-73	0.352452	0.295	0.015	4.12076e-69	3.1	spint2
hoxb3a	2.36497e-72	0.310312	0.359	0.031	3.53752e-68	3.1	hoxb3a
pfn1	6.10416e-72	0.621932	0.557	0.094	9.1306e-68	3.1	pfn1
apln	6.20381e-72	0.244594	0.249	0.007	9.27965e-68	3.1	apln
p3h2	6.24143e-71	0.267338	0.274	0.012	9.33593e-67	3.1	p3h2
vcam1b	1.57989e-70	0.329086	0.266	0.011	2.3632e-66	3.1	vcam1b
flnb	2.35572e-70	0.276855	0.241	0.006	3.52368e-66	3.1	flnb
rpl35	2.49018e-70	0.516645	1	0.983	3.72482e-66	3.1	rpl35
negr1	4.1423e-70	0.221198	0.228	0.004	6.19605e-66	3.1	negr1
ahnak	4.44367e-70	0.961264	0.911	0.425	6.64684e-66	3.1	ahnak
rab3db	1.09466e-69	0.259635	0.27	0.012	1.6374e-65	3.1	rab3db
mxra8a	3.15106e-69	0.482603	0.511	0.083	4.71335e-65	3.1	mxra8a
dnah2	9.02737e-69	0.278774	0.211	0.003	1.35031e-64	3.1	dnah2
magi1b	8.35919e-68	0.467051	0.578	0.122	1.25037e-63	3.1	magi1b
slc29a1a	3.05812e-67	0.673577	0.616	0.139	4.57433e-63	3.1	slc29a1a
ppdpfa	7.14901e-66	0.396945	0.321	0.027	1.06935e-61	3.1	ppdpfa
rpl22	8.95123e-66	0.544403	1	0.928	1.33893e-61	3.1	rpl22
col6a2	1.91052e-65	0.408411	0.295	0.021	2.85776e-61	3.1	col6a2
st5	8.94259e-65	0.574235	0.705	0.209	1.33763e-60	3.1	st5
rpl14	9.6166e-65	0.471653	1	0.987	1.43845e-60	3.1	rpl14
rps27.2	2.82351e-64	0.48532	1	0.959	4.22341e-60	3.1	rps27.2
f8	3.5661e-64	0.206134	0.198	0.003	5.33417e-60	3.1	f8
ppp1r9ba	6.38739e-64	0.348246	0.367	0.042	9.55425e-60	3.1	ppp1r9ba
ca16b	1.22833e-63	0.280581	0.283	0.019	1.83733e-59	3.1	ca16b
col5a1	2.92679e-63	0.406116	0.308	0.025	4.3779e-59	3.1	col5a1
col5a2a	3.95198e-63	0.228064	0.224	0.007	5.91137e-59	3.1	col5a2a
nfia	4.79741e-63	0.353771	0.414	0.058	7.17597e-59	3.1	nfia
si:ch211-1a19.3	5.44674e-63	0.703491	0.679	0.179	8.14724e-59	3.1	si:ch211-1a19.3
rps26	7.01616e-63	0.511393	1	0.959	1.04948e-58	3.1	rps26
cxcl18b	7.16697e-63	1.37902	0.654	0.195	1.07204e-58	3.1	cxcl18b
col6a3	8.49418e-63	0.298127	0.219	0.006	1.27056e-58	3.1	col6a3
wls	1.87011e-62	0.466449	0.494	0.085	2.79731e-58	3.1	wls
CT027638.1	9.80516e-62	1.12913	0.591	0.147	1.46666e-57	3.1	CT027638.1
cav1	2.32473e-61	0.730451	0.722	0.263	3.47734e-57	3.1	cav1
flrt2.1	2.85032e-61	0.182509	0.186	0.002	4.26351e-57	3.1	flrt2.1
flt4	3.44983e-61	0.228852	0.232	0.01	5.16025e-57	3.1	flt4
glo1	4.44261e-61	0.369394	0.388	0.049	6.64526e-57	3.1	glo1
rpl12	8.25543e-61	0.378396	1	0.996	1.23485e-56	3.1	rpl12
hdlbpa	1.18228e-60	0.396529	0.392	0.05	1.76846e-56	3.1	hdlbpa
mfap5	2.83096e-60	0.274955	0.266	0.017	4.23455e-56	3.1	mfap5
kcnq1.1	3.37554e-60	0.242899	0.249	0.013	5.04914e-56	3.1	kcnq1.1
txnipa	9.13329e-60	0.679711	0.616	0.151	1.36616e-55	3.1	txnipa
fzd10	2.28556e-58	0.3412	0.384	0.052	3.41874e-54	3.1	fzd10
atp2a3	3.52338e-58	0.251593	0.287	0.024	5.27027e-54	3.1	atp2a3
tcima	5.15196e-58	0.788695	0.312	0.031	7.70631e-54	3.1	tcima
shdb	1.45956e-57	0.316282	0.283	0.023	2.18321e-53	3.1	shdb
mgst3a	6.1365e-57	0.441019	0.384	0.054	9.17897e-53	3.1	mgst3a
tenm3	1.82523e-56	0.35458	0.409	0.064	2.73018e-52	3.1	tenm3
rplp2	1.02676e-55	0.576604	0.979	0.803	1.53583e-51	3.1	rplp2
lmo7a	2.4415e-55	0.242899	0.236	0.014	3.652e-51	3.1	lmo7a
dhrs9	2.76841e-55	0.193892	0.186	0.004	4.14098e-51	3.1	dhrs9
esr2b	6.35819e-55	0.356975	0.456	0.087	9.51058e-51	3.1	esr2b
ch25h	9.49158e-55	0.88953	0.376	0.056	1.41975e-50	3.1	ch25h
si:ch211-253b8.5	2.11752e-54	0.204454	0.198	0.007	3.16738e-50	3.1	si:ch211-253b8.5
rps14	3.03045e-54	0.365703	1	0.999	4.53295e-50	3.1	rps14
f11r.1	3.18059e-54	0.473229	0.57	0.133	4.75753e-50	3.1	f11r.1
rps15	3.79279e-54	0.360249	1	0.999	5.67326e-50	3.1	rps15
rassf7b	4.78196e-54	0.217315	0.236	0.015	7.15285e-50	3.1	rassf7b
col14a1a	4.91859e-54	0.289839	0.257	0.02	7.35723e-50	3.1	col14a1a
ccnd1	1.2329e-53	0.358177	0.46	0.088	1.84417e-49	3.1	ccnd1
jpt1b	2.75924e-53	0.529128	0.57	0.138	4.12727e-49	3.1	jpt1b
slc26a4	3.69085e-52	0.159954	0.165	0.003	5.52077e-48	3.1	slc26a4
zgc:92313	5.27956e-52	0.372211	0.367	0.053	7.89717e-48	3.1	zgc:92313
adh5	1.83585e-51	0.534105	0.658	0.197	2.74606e-47	3.1	adh5
ahcyl2	2.52275e-51	0.465205	0.532	0.136	3.77353e-47	3.1	ahcyl2
tmem258	5.49493e-51	0.396544	0.435	0.079	8.21932e-47	3.1	tmem258
si:dkey-112e7.2	5.65425e-51	0.40547	0.418	0.075	8.45763e-47	3.1	si:dkey-112e7.2
erbb4b	8.79976e-51	0.17355	0.169	0.004	1.31627e-46	3.1	erbb4b
foxj1a	1.17161e-50	0.435927	0.228	0.015	1.75249e-46	3.1	foxj1a
epha6	2.56024e-50	0.190073	0.19	0.008	3.8296e-46	3.1	epha6
rpl31	2.90394e-50	0.402494	1	0.992	4.34371e-46	3.1	rpl31
alkbh3.1	3.6301e-50	0.433588	0.304	0.037	5.42991e-46	3.1	alkbh3.1
eevs	1.95255e-49	0.164546	0.173	0.005	2.92062e-45	3.1	eevs
tpt1	3.95475e-49	0.522698	0.979	0.833	5.91551e-45	3.1	tpt1
cldnc	5.04e-49	0.436552	0.409	0.076	7.53883e-45	3.1	cldnc
cldn7b	6.1561e-49	0.394673	0.325	0.044	9.20829e-45	3.1	cldn7b
rps9	1.02879e-48	0.35573	1	0.994	1.53886e-44	3.1	rps9
rps22	4.39378e-48	0.408423	1	0.988	6.57221e-44	3.1	rps2
rhbdl3	8.42789e-48	0.160592	0.152	0.003	1.26064e-43	3.1	rhbdl3
rps25	1.1171e-47	0.401801	1	0.988	1.67095e-43	3.1	rps25
nuak1b	1.75803e-47	0.200508	0.224	0.017	2.62967e-43	3.1	nuak1b
prdx5	2.49146e-47	0.518269	0.675	0.216	3.72672e-43	3.1	prdx5
midn	2.49147e-47	0.808727	0.603	0.19	3.72674e-43	3.1	midn
gpx1b	6.04159e-47	0.221272	0.224	0.017	9.03701e-43	3.1	gpx1b
wdr93	9.67373e-47	0.129721	0.135	0.001	1.447e-42	3.1	wdr93
rpl30	1.1546e-46	0.406746	1	0.963	1.72706e-42	3.1	rpl30
srpx	2.52764e-46	0.213976	0.219	0.017	3.78084e-42	3.1	srpx
lmo4a	2.89283e-46	0.236732	0.295	0.038	4.32709e-42	3.1	lmo4a
tuba8l3	3.78596e-46	0.282861	0.304	0.041	5.66304e-42	3.1	tuba8l3
zgc:152791	5.34969e-46	0.739673	0.789	0.329	8.00207e-42	3.1	zgc:152791
rps19	1.51734e-45	0.346304	1	0.997	2.26964e-41	3.1	rps19
nanos1	1.78962e-45	0.453881	0.57	0.162	2.67691e-41	3.1	nanos1
csrp1a	2.40749e-45	0.389748	0.38	0.07	3.60113e-41	3.1	csrp1a
grhl1	3.06744e-45	0.242383	0.27	0.031	4.58828e-41	3.1	grhl1
myrf	6.75695e-45	0.135822	0.139	0.002	1.0107e-40	3.1	myrf
fgl2a	2.52426e-44	0.337345	0.397	0.078	3.77579e-40	3.1	fgl2a
ptprr	3.59715e-44	0.167461	0.165	0.006	5.38062e-40	3.1	ptprr
uba52	3.81324e-44	0.318603	1	0.997	5.70384e-40	3.1	uba52
ttyh2	4.9517e-44	0.213347	0.219	0.019	7.40675e-40	3.1	ttyh2
rbm47	4.9813e-44	0.185003	0.198	0.013	7.45103e-40	3.1	rbm47
sec61g	9.02937e-44	0.638391	0.878	0.528	1.35061e-39	3.1	sec61g
si:ch211-198c19.3	1.54578e-43	0.195594	0.194	0.013	2.31217e-39	3.1	si:ch211-198c19.3
gli2a	1.6778e-43	0.143599	0.152	0.004	2.50965e-39	3.1	gli2a
cd9a	2.66318e-43	0.312625	0.38	0.075	3.98359e-39	3.1	cd9a
si:ch211-137i24.101	2.69372e-43	0.5563	0.781	0.32	4.02926e-39	3.1	si:ch211-137i24.10
zgc:153372	5.48441e-43	0.309681	0.392	0.081	8.20358e-39	3.1	zgc:153372
rpl18a	2.93383e-42	0.33883	1	0.998	4.38842e-38	3.1	rpl18a
anxa5b	3.43989e-42	0.332433	0.392	0.076	5.14539e-38	3.1	anxa5b
itgb4	4.48321e-42	0.129081	0.127	0.001	6.70598e-38	3.1	itgb4
cox8b	6.94425e-42	0.265934	0.278	0.037	1.03872e-37	3.1	cox8b
rai14	7.18521e-42	0.211253	0.232	0.024	1.07476e-37	3.1	rai14
hopx	1.71152e-41	0.332571	0.219	0.02	2.56009e-37	3.1	hopx
rpl33	2.89059e-41	0.455693	0.996	0.921	4.32374e-37	3.1	rpl3
dmxl2	3.14033e-41	0.236363	0.249	0.029	4.69731e-37	3.1	dmxl2
rps16	4.06074e-41	0.316896	1	0.997	6.07406e-37	3.1	rps16
plxnb1a	5.49037e-41	0.344201	0.376	0.073	8.2125e-37	3.1	plxnb1a
si:dkey-151g10.6	6.03756e-41	0.350036	1	0.999	9.03098e-37	3.1	si:dkey-151g10.6
dbn1	6.52727e-41	0.25572	0.27	0.037	9.76349e-37	3.1	dbn1
rps11	6.69317e-41	0.303323	1	0.997	1.00116e-36	3.1	rps11
aplp1	6.8443e-41	0.204982	0.219	0.021	1.02377e-36	3.1	aplp1
gig2d	7.05288e-41	0.235987	0.194	0.015	1.05497e-36	3.1	gig2d
krt8	1.48258e-40	0.489242	1	0.955	2.21764e-36	3.1	krt8
sertad4	1.48489e-40	0.141232	0.139	0.004	2.22109e-36	3.1	sertad4
pbx3b	1.80238e-40	0.138214	0.135	0.003	2.696e-36	3.1	pbx3b
im:7151449	3.48983e-40	0.148935	0.156	0.007	5.22009e-36	3.1	im:7151449
pard6a	4.77387e-40	0.184672	0.194	0.015	7.14075e-36	3.1	pard6a
rps27.1	5.09867e-40	0.323012	1	0.987	7.6266e-36	3.1	rps27.1
litaf	6.48431e-40	0.372174	0.388	0.084	9.69924e-36	3.1	litaf
ptprua	1.02414e-39	0.149998	0.165	0.009	1.53192e-35	3.1	ptprua
chd5	1.67525e-39	0.188401	0.203	0.018	2.50583e-35	3.1	chd5
rpl13	1.72371e-39	0.26894	1	0.999	2.57833e-35	3.1	rpl13
slc29a4	2.0044e-39	0.1363	0.143	0.005	2.99819e-35	3.1	slc29a4
rpl24	2.77139e-39	0.308759	1	0.997	4.14545e-35	3.1	rpl24
esr2a	3.30188e-39	0.372391	0.477	0.135	4.93895e-35	3.1	esr2a
fap	4.11094e-39	0.110389	0.118	0.001	6.14914e-35	3.1	fap
sp5a	4.22185e-39	0.165553	0.156	0.008	6.31504e-35	3.1	sp5a
wt1a	5.20969e-39	0.228331	0.27	0.039	7.79265e-35	3.1	wt1a
serpine3	5.50573e-39	0.141232	0.131	0.003	8.23548e-35	3.1	serpine3
neurl1ab	5.66688e-39	0.267783	0.312	0.054	8.47651e-35	3.1	neurl1ab
kank2	7.25104e-39	0.173015	0.203	0.019	1.08461e-34	3.1	kank2
hoxb5a	7.2827e-39	0.19182	0.203	0.019	1.08935e-34	3.1	hoxb5a
cavin1b	8.69421e-39	0.60549	0.658	0.273	1.30048e-34	3.1	cavin1b
pigr	3.12729e-38	0.139319	0.143	0.006	4.6778e-34	3.1	pigr
rps26l	3.49801e-38	0.358093	1	0.992	5.23232e-34	3.1	rps26l
si:dkey-28b4.8	4.53038e-38	0.248704	0.316	0.058	6.77654e-34	3.1	si:dkey-28b4.8
tmcc3	6.61655e-38	0.214959	0.245	0.032	9.89704e-34	3.1	tmcc3
rps24	3.54231e-37	0.299489	1	0.999	5.29859e-33	3.1	rps24
ifi46	4.40618e-37	0.56334	0.949	0.664	6.59076e-33	3.1	ifi46
irf8	5.34852e-37	0.259262	0.203	0.02	8.00031e-33	3.1	irf8
rps8a	6.53714e-37	0.311936	0.996	0.996	9.77826e-33	3.1	rps8a
nr0b2a	7.10011e-37	0.168098	0.139	0.006	1.06203e-32	3.1	nr0b2a
lurap1	7.861e-37	0.205885	0.249	0.035	1.17585e-32	3.1	lurap1
rpl36a	8.21371e-37	0.358761	1	0.997	1.22861e-32	3.1	rpl36a
tpd52l2b	9.47158e-37	0.346878	0.447	0.116	1.41676e-32	3.1	tpd52l2b
serpinh1b	1.06242e-36	0.583168	0.418	0.104	1.58917e-32	3.1	serpinh1b
col4a2	1.77504e-36	0.280988	0.295	0.053	2.65511e-32	3.1	col4a2
si:dkeyp-75h12.5	1.78009e-36	0.410704	0.447	0.122	2.66266e-32	3.1	si:dkeyp-75h12.5
fras1	1.93148e-36	0.209821	0.262	0.039	2.88911e-32	3.1	fras1
txn	2.56637e-36	0.273977	0.295	0.051	3.83878e-32	3.1	txn
rps7	3.14479e-36	0.284215	1	0.999	4.70398e-32	3.1	rps7
sdcbp2	3.612e-36	0.516166	0.776	0.375	5.40282e-32	3.1	sdcbp2
col1a2	5.42399e-36	0.174528	0.118	0.003	8.1132e-32	3.1	col1a2
eef1g	5.42872e-36	0.396611	0.996	0.969	8.12028e-32	3.1	eef1g
dchs1a	5.6789e-36	0.239326	0.308	0.056	8.4945e-32	3.1	dchs1a
mapk8ip1a	7.66362e-36	0.154811	0.186	0.017	1.14632e-31	3.1	mapk8ip1a
tbx2b	1.37169e-35	0.13487	0.152	0.009	2.05178e-31	3.1	tbx2b
rpl34	2.15239e-35	0.384157	0.992	0.913	3.21955e-31	3.1	rpl34
tmsb11	2.23626e-35	0.673604	0.966	0.761	3.34499e-31	3.1	tmsb1
RPS17	2.44131e-35	0.319167	1	0.992	3.65172e-31	3.1	RPS17
eef1db	3.65854e-35	0.556835	0.878	0.555	5.47244e-31	3.1	eef1db
ctsk	4.16105e-35	0.31931	0.473	0.138	6.22409e-31	3.1	ctsk
rpl23a	7.07612e-35	0.317911	1	0.986	1.05845e-30	3.1	rpl23a
rps28	1.12097e-34	0.365691	1	0.994	1.67674e-30	3.1	rps28
tppp3	1.19784e-34	0.175467	0.11	0.002	1.79172e-30	3.1	tppp3
si:dkey-188i13.9	1.21707e-34	0.348787	0.367	0.086	1.8205e-30	3.1	si:dkey-188i13.9
ppfibp1a	1.42617e-34	0.440511	0.612	0.217	2.13326e-30	3.1	ppfibp1a
sec61a1	2.01686e-34	0.246473	0.266	0.042	3.01682e-30	3.1	sec61a1
cxxc5a	3.57855e-34	0.34904	0.481	0.152	5.35279e-30	3.1	cxxc5a
twist1a	6.01621e-34	0.195125	0.181	0.017	8.99905e-30	3.1	twist1a
raraa	6.32659e-34	0.220454	0.241	0.036	9.46331e-30	3.1	raraa
ndrg4	1.03971e-33	0.195025	0.219	0.029	1.5552e-29	3.1	ndrg4
wscd2	1.30858e-33	0.130084	0.139	0.008	1.95738e-29	3.1	wscd2
anxa3b	3.03921e-33	0.312268	0.456	0.126	4.54604e-29	3.1	anxa3b
igfbp1a	3.86896e-33	0.315405	0.135	0.007	5.78718e-29	3.1	igfbp1a
rxfp2a	3.98544e-33	0.112238	0.11	0.003	5.96142e-29	3.1	rxfp2a
rps10	5.03851e-33	0.235261	1	1	7.53661e-29	3.1	rps10
s100v2	5.78489e-33	0.550517	0.861	0.53	8.65304e-29	3.1	s100v2
arhgdig	6.63015e-33	0.293203	0.329	0.07	9.91738e-29	3.1	arhgdig
rps29	7.74387e-33	0.389938	1	0.993	1.15833e-28	3.1	rps29
cdh2	9.97976e-33	0.39679	0.451	0.144	1.49277e-28	3.1	cdh2
ap1b1	1.8306e-32	0.181816	0.19	0.02	2.73822e-28	3.1	ap1b1
rpl13a	1.90732e-32	0.234613	1	0.999	2.85298e-28	3.1	rpl13a
rpl15	3.38491e-32	0.348052	0.996	0.98	5.06315e-28	3.1	rpl15
ngdn	3.58167e-32	0.229035	0.253	0.041	5.35746e-28	3.1	ngdn
tnk2b	3.59884e-32	0.168267	0.181	0.019	5.38314e-28	3.1	tnk2b
rps181	5.37971e-32	0.372936	0.983	0.894	8.04697e-28	3.1	rps18
fgfr3	6.66748e-32	0.339509	0.456	0.13	9.97322e-28	3.1	fgfr3
rgs16	8.79293e-32	0.150846	0.11	0.003	1.31525e-27	3.1	rgs16
nab2	1.02394e-31	0.10533	0.105	0.003	1.53161e-27	3.1	nab2
map1ab	1.0601e-31	0.168816	0.139	0.009	1.58569e-27	3.1	map1ab
lzts2a	1.35029e-31	0.181826	0.211	0.029	2.01977e-27	3.1	lzts2a
tmem200b	2.35536e-31	0.160868	0.165	0.015	3.52314e-27	3.1	tmem200b
rasl11a	2.4326e-31	0.193958	0.232	0.036	3.63868e-27	3.1	rasl11a
glud1a	3.57795e-31	0.301284	0.447	0.125	5.3519e-27	3.1	glud1a
cgnl1	6.61321e-31	0.266773	0.338	0.082	9.89203e-27	3.1	cgnl1
afap1	8.43826e-31	0.138513	0.139	0.01	1.26219e-26	3.1	afap1
xbp1	8.44241e-31	0.583045	0.73	0.369	1.26282e-26	3.1	xbp1
gadd45bb	1.15305e-30	0.537948	0.35	0.086	1.72474e-26	3.1	gadd45bb
caprin1b	1.32591e-30	0.292696	0.43	0.12	1.9833e-26	3.1	caprin1b
sfrp1a	1.59968e-30	0.104053	0.11	0.004	2.3928e-26	3.1	sfrp1a
pdgfbb	2.42835e-30	0.124495	0.135	0.009	3.63233e-26	3.1	pdgfbb
ecm1a	2.60754e-30	0.106609	0.093	0.001	3.90036e-26	3.1	ecm1a
cd99	3.20162e-30	0.384454	0.473	0.155	4.78898e-26	3.1	cd99
rplp01	3.4654e-30	0.337931	1	0.983	5.18354e-26	3.1	rplp0
cd248a	3.85392e-30	0.118993	0.122	0.006	5.7647e-26	3.1	cd248a
CR753876.1	4.96378e-30	0.381536	0.232	0.038	7.42482e-26	3.1	CR753876.1
usp43b	6.17785e-30	0.186435	0.219	0.034	9.24083e-26	3.1	usp43b
unc13ba	6.44807e-30	0.117723	0.131	0.008	9.64502e-26	3.1	unc13ba
rpl28	1.18139e-29	0.239554	1	0.997	1.76712e-25	3.1	rpl28
rpl41	2.07485e-29	0.541981	0.848	0.522	3.10355e-25	3.1	rpl4
eef1b21	2.20622e-29	0.385763	0.97	0.814	3.30006e-25	3.1	eef1b2
rps27a	2.26432e-29	0.234616	1	1	3.38697e-25	3.1	rps27a
h2afvb	3.31768e-29	0.427975	0.511	0.164	4.96259e-25	3.1	h2afvb
fosl2	4.11139e-29	0.276711	0.371	0.103	6.14982e-25	3.1	fosl2
rps15a1	7.56824e-29	0.264539	1	0.999	1.13206e-24	3.1	rps15a
rps23	7.90863e-29	0.26349	1	0.994	1.18297e-24	3.1	rps23
lamb1b	1.42295e-28	0.150837	0.19	0.026	2.12845e-24	3.1	lamb1b
arhgap27l	1.46718e-28	0.158267	0.194	0.027	2.19461e-24	3.1	arhgap27l
rbfox3a	1.57778e-28	0.151047	0.165	0.018	2.36004e-24	3.1	rbfox3a
myl6	2.41373e-28	0.211432	0.283	0.059	3.61046e-24	3.1	myl6
rpl192	3.2798e-28	0.231524	1	0.999	4.90592e-24	3.1	rpl19
hpn	5.39342e-28	0.265274	0.46	0.148	8.06748e-24	3.1	hpn
kif19	8.06586e-28	0.12196	0.135	0.011	1.20649e-23	3.1	kif19
slc15a2	9.68518e-28	0.11026	0.127	0.009	1.44871e-23	3.1	slc15a2
pdia3	1.17637e-27	0.401767	0.586	0.233	1.75962e-23	3.1	pdia3
add3b	1.58174e-27	0.134562	0.156	0.017	2.36597e-23	3.1	add3b
spns2	2.07377e-27	0.101535	0.093	0.003	3.10195e-23	3.1	spns2
sik1	2.66852e-27	0.35636	0.527	0.19	3.99158e-23	3.1	sik1
esr1	6.4665e-27	0.172494	0.198	0.031	9.67259e-23	3.1	esr1
si:ch211-195b15.8	6.5205e-27	0.243276	0.266	0.057	9.75336e-23	3.1	si:ch211-195b15.8
efna1a	7.4866e-27	0.19029	0.232	0.044	1.11985e-22	3.1	efna1a
calm1b	7.62963e-27	0.199457	0.274	0.06	1.14124e-22	3.1	calm1b
si:ch211-105j21.9	8.30179e-27	0.117631	0.139	0.013	1.24178e-22	3.1	si:ch211-105j21.9
pcdh1b	1.00944e-26	0.150628	0.177	0.024	1.50992e-22	3.1	pcdh1b
ube2e1	1.48537e-26	0.20036	0.274	0.058	2.22182e-22	3.1	ube2e1
CR383676.1	3.21939e-26	0.249709	1	0.999	4.81556e-22	3.1	CR383676.1
rpl22l11	3.27889e-26	0.573296	0.726	0.366	4.90457e-22	3.1	rpl22l1
rpl171	4.00587e-26	0.236695	1	0.997	5.99198e-22	3.1	rpl17
zgc:92606	4.39795e-26	0.282556	0.443	0.142	6.57846e-22	3.1	zgc:92606
s100v1	4.44281e-26	0.125765	0.118	0.008	6.64555e-22	3.1	s100v1
ywhah	4.82958e-26	0.215908	0.338	0.09	7.22408e-22	3.1	ywhah
snx10a	7.29829e-26	0.130304	0.127	0.01	1.09168e-21	3.1	snx10a
prrg2	7.71721e-26	0.159181	0.181	0.026	1.15434e-21	3.1	prrg2
si:ch1073-303k11.2	8.09749e-26	0.117178	0.105	0.006	1.21122e-21	3.1	si:ch1073-303k11.2
rassf2a	9.22297e-26	0.217742	0.232	0.046	1.37957e-21	3.1	rassf2a
CABZ01073795.1	1.0106e-25	0.427929	0.426	0.142	1.51165e-21	3.1	CABZ01073795.1
hoxb6a	1.2197e-25	0.111531	0.114	0.008	1.82443e-21	3.1	hoxb6a
rpsa1	1.48135e-25	0.302288	1	0.983	2.21581e-21	3.1	rpsa
TENM3	1.92608e-25	0.136452	0.139	0.014	2.88103e-21	3.1	TENM3
tagapa	2.12126e-25	0.191243	0.186	0.028	3.17298e-21	3.1	tagapa
ncam1a	2.30382e-25	0.128549	0.139	0.014	3.44605e-21	3.1	ncam1a
aste1a	2.34291e-25	0.616301	0.586	0.281	3.50452e-21	3.1	aste1a
rock2b.1	2.65737e-25	0.147693	0.152	0.018	3.97489e-21	3.1	rock2b.1
zgc:113054	3.43531e-25	0.188852	0.211	0.038	5.13854e-21	3.1	zgc:113054
zgc:158463	3.43722e-25	0.584117	0.641	0.322	5.14139e-21	3.1	zgc:158463
rbpms2b	3.49122e-25	0.242895	0.181	0.027	5.22217e-21	3.1	rbpms2b
tmsb2	3.82552e-25	0.108991	0.11	0.007	5.72222e-21	3.1	tmsb2
rpl10a1	3.85338e-25	0.237501	1	0.997	5.76389e-21	3.1	rpl10a
tuba1a	4.48349e-25	0.141428	0.152	0.018	6.7064e-21	3.1	tuba1a
hsp90ab11	5.52751e-25	0.293925	1	0.981	8.26805e-21	3.1	hsp90ab1
pxna	7.01194e-25	0.157645	0.156	0.019	1.04885e-20	3.1	pxna
lasp1	8.28462e-25	0.326182	0.523	0.199	1.23921e-20	3.1	lasp1
glrx5	8.65489e-25	0.282626	0.447	0.151	1.2946e-20	3.1	glrx5
si:dkey-51e6.1	8.65547e-25	0.260591	0.262	0.061	1.29469e-20	3.1	si:dkey-51e6.1
rpl181	9.1271e-25	0.226946	1	0.995	1.36523e-20	3.1	rpl18
anxa11a	1.21158e-24	0.204398	0.291	0.07	1.81229e-20	3.1	anxa11a
eno3	1.32403e-24	0.25848	0.325	0.085	1.98049e-20	3.1	eno3
il17rd	1.98197e-24	0.158801	0.207	0.038	2.96463e-20	3.1	il17rd
rca2.1	2.57832e-24	0.243174	0.304	0.079	3.85665e-20	3.1	rca2.1
rpl61	6.16242e-24	0.460901	0.81	0.531	9.21774e-20	3.1	rpl6
lmbr1l	8.3539e-24	0.142678	0.165	0.024	1.24958e-19	3.1	lmbr1l
si:dkey-188i13.10	1.01973e-23	0.380204	0.65	0.301	1.52532e-19	3.1	si:dkey-188i13.10
slc25a23a	1.07938e-23	0.157414	0.181	0.029	1.61454e-19	3.1	slc25a23a
rplp2l	1.70706e-23	0.306624	0.996	0.992	2.55341e-19	3.1	rplp2l
calm3a	1.72082e-23	0.430486	0.738	0.372	2.57401e-19	3.1	calm3a
hoxb9a	1.75722e-23	0.100867	0.101	0.006	2.62845e-19	3.1	hoxb9a
tnfrsf11a	2.28312e-23	0.11392	0.122	0.012	3.41509e-19	3.1	tnfrsf11a
sec61b	3.37066e-23	0.298573	0.38	0.122	5.04184e-19	3.1	sec61b
ppp1r3ca	4.13252e-23	0.12981	0.131	0.014	6.18143e-19	3.1	ppp1r3ca
clk4a	4.53337e-23	0.250105	0.388	0.124	6.78101e-19	3.1	clk4a
tomm5	6.29839e-23	0.276504	0.523	0.201	9.42113e-19	3.1	tomm5
rpl21	1.13657e-22	0.222009	1	0.997	1.70008e-18	3.1	rpl21
afdna	1.37608e-22	0.293602	0.468	0.193	2.05834e-18	3.1	afdna
rpl37.1	1.89592e-22	0.275658	1	0.999	2.83592e-18	3.1	rpl37.1
itgav	1.89836e-22	0.193689	0.249	0.06	2.83956e-18	3.1	itgav
fzd7a	2.75835e-22	0.161267	0.19	0.035	4.12594e-18	3.1	fzd7a
anxa2a1	4.67396e-22	0.447175	0.797	0.425	6.99131e-18	3.1	anxa2a
ier5l	6.26843e-22	0.156862	0.127	0.014	9.37632e-18	3.1	ier5l
nacad	6.64239e-22	0.105778	0.122	0.013	9.93569e-18	3.1	nacad
anxa4	7.68315e-22	0.334733	0.54	0.227	1.14925e-17	3.1	anxa4
cldn5a	7.78178e-22	0.294919	0.553	0.253	1.164e-17	3.1	cldn5a
serpinf1	8.20591e-22	0.199905	0.266	0.068	1.22744e-17	3.1	serpinf1
gse1	9.20039e-22	0.138146	0.173	0.029	1.37619e-17	3.1	gse1
rps131	9.61904e-22	0.222684	1	0.998	1.43882e-17	3.1	rps13
rpl101	9.95874e-22	0.206396	1	0.998	1.48963e-17	3.1	rpl10
fat1a	1.00136e-21	0.279781	0.456	0.188	1.49783e-17	3.1	fat1a
hspb8	1.16195e-21	0.155838	0.215	0.046	1.73805e-17	3.1	hspb8
ace	1.63427e-21	0.158509	0.283	0.075	2.44454e-17	3.1	ace
st14a	1.64012e-21	0.217793	0.232	0.054	2.45329e-17	3.1	st14a
si:ch211-166a6.5	1.8052e-21	0.217887	0.333	0.106	2.70021e-17	3.1	si:ch211-166a6.5
capgb	1.81375e-21	0.102073	0.118	0.012	2.71301e-17	3.1	capgb
klf11b	2.04848e-21	0.335964	0.519	0.211	3.06411e-17	3.1	klf11b
zgc:1627301	2.40996e-21	0.624274	0.755	0.476	3.60482e-17	3.1	zgc:162730
tspan18b	2.55359e-21	0.278321	0.506	0.197	3.81966e-17	3.1	tspan18b
rpl36	2.80916e-21	0.278629	1	0.974	4.20195e-17	3.1	rpl36
si:rp71-36a1.1	3.38591e-21	0.291868	0.532	0.249	5.06465e-17	3.1	si:rp71-36a1.1
capn2b	3.79115e-21	0.202541	0.308	0.093	5.6708e-17	3.1	capn2b
mt-co31	4.10949e-21	0.245195	1	1	6.14698e-17	3.1	mt-co3
rps61	4.6954e-21	0.289894	0.987	0.921	7.02338e-17	3.1	rps6
dynll1	6.63421e-21	0.320899	0.367	0.116	9.92345e-17	3.1	dynll1
ptprz1a	7.93324e-21	0.112025	0.122	0.014	1.18665e-16	3.1	ptprz1a
sf3b1	9.47514e-21	0.201976	0.342	0.105	1.41729e-16	3.1	sf3b1
reep3a	1.43649e-20	0.166338	0.236	0.058	2.1487e-16	3.1	reep3a
nop53	1.57316e-20	0.278487	0.586	0.25	2.35314e-16	3.1	nop53
rsl24d1	1.76581e-20	0.383191	0.865	0.573	2.6413e-16	3.1	rsl24d1
serinc2	2.62475e-20	0.316578	0.536	0.231	3.92611e-16	3.1	serinc2
ca10a	2.78102e-20	0.121119	0.135	0.019	4.15985e-16	3.1	ca10a
lmo4b	3.56026e-20	0.101472	0.101	0.009	5.32544e-16	3.1	lmo4b
cd9b	4.1705e-20	0.1407	0.101	0.009	6.23823e-16	3.1	cd9b
tnrc6c1	4.30907e-20	0.276412	0.565	0.246	6.44551e-16	3.1	tnrc6c1
notum1b	4.57981e-20	0.122785	0.127	0.016	6.85048e-16	3.1	notum1b
si:dkeyp-9d4.2	6.8823e-20	0.255727	0.338	0.113	1.02945e-15	3.1	si:dkeyp-9d4.2
spata13	8.0603e-20	0.121119	0.135	0.019	1.20566e-15	3.1	spata13
htr1d	8.09933e-20	0.144678	0.186	0.038	1.2115e-15	3.1	htr1d
si:ch211-226m16.2	1.09582e-19	0.131623	0.16	0.028	1.63913e-15	3.1	si:ch211-226m16.2
rpl35a1	1.31086e-19	0.233446	1	0.991	1.96078e-15	3.1	rpl35a
mycbp	1.35309e-19	0.213991	0.291	0.084	2.02395e-15	3.1	mycbp
tnfb	1.98594e-19	0.178368	0.076	0.004	2.97057e-15	3.1	tnfb
mao	2.13945e-19	0.137661	0.19	0.04	3.20018e-15	3.1	mao
cd151l	2.62767e-19	0.142052	0.198	0.042	3.93048e-15	3.1	cd151l
hspb12	2.65355e-19	0.533551	0.857	0.561	3.96918e-15	3.1	hspb1
rpl38	2.69169e-19	0.283059	0.992	0.981	4.02624e-15	3.1	rpl38
si:ch211-156j16.11	2.81564e-19	0.330048	0.549	0.24	4.21164e-15	3.1	si:ch211-156j16.1
ccn11	2.89229e-19	0.539151	0.523	0.241	4.32629e-15	3.1	ccn1
rpl9.11	2.93372e-19	0.219127	1	0.995	4.38826e-15	3.1	rpl9.1
pnrc22	3.01948e-19	0.451178	0.945	0.826	4.51654e-15	3.1	pnrc2
gas1b	3.13056e-19	0.235814	0.371	0.139	4.68269e-15	3.1	gas1b
rps21	4.15033e-19	0.264918	1	0.995	6.20807e-15	3.1	rps21
rhocb	6.61525e-19	0.250394	0.405	0.15	9.89509e-15	3.1	rhocb
thy1	6.65288e-19	0.248515	0.156	0.028	9.95137e-15	3.1	thy1
cpne1	6.67565e-19	0.24382	0.464	0.184	9.98543e-15	3.1	cpne1
cebpa	7.57919e-19	0.105239	0.101	0.01	1.1337e-14	3.1	cebpa
ptp4a1	9.71948e-19	0.17494	0.211	0.05	1.45384e-14	3.1	ptp4a1
hsp90b1	1.23934e-18	0.215494	0.257	0.07	1.85381e-14	3.1	hsp90b1
si:dkey-112a7.4	1.4397e-18	0.22167	0.278	0.082	2.15351e-14	3.1	si:dkey-112a7.4
map2k1	1.7809e-18	0.223074	0.367	0.139	2.66386e-14	3.1	map2k1
ccdc88c	1.79298e-18	0.119766	0.148	0.026	2.68194e-14	3.1	ccdc88c
pcp4l1	1.90657e-18	0.163963	0.177	0.037	2.85185e-14	3.1	pcp4l1
sh3bgrl3	2.07893e-18	0.166296	0.236	0.061	3.10966e-14	3.1	sh3bgrl3
klf13	2.30368e-18	0.139949	0.186	0.041	3.44585e-14	3.1	klf13
ccni	2.52516e-18	0.336915	0.802	0.479	3.77713e-14	3.1	ccni
pkp2	3.08521e-18	0.113465	0.156	0.029	4.61485e-14	3.1	pkp2
vim	3.62255e-18	0.176843	0.148	0.026	5.4186e-14	3.1	vim
si:dkey-31f5.8	4.10147e-18	0.123521	0.122	0.017	6.13497e-14	3.1	si:dkey-31f5.8
RPL37A	4.41261e-18	0.252775	1	0.997	6.60038e-14	3.1	RPL37A
sumo2b	4.43242e-18	0.229019	0.464	0.187	6.63001e-14	3.1	sumo2b
fam171a2a	4.89803e-18	0.124315	0.165	0.033	7.32648e-14	3.1	fam171a2a
cdc42ep4b	5.24995e-18	0.16166	0.245	0.07	7.85288e-14	3.1	cdc42ep4b
fgfrl1a	6.36044e-18	0.155	0.257	0.074	9.51395e-14	3.1	fgfrl1a
yap1	7.51587e-18	0.260391	0.498	0.24	1.12422e-13	3.1	yap1
pfdn1	9.04535e-18	0.159691	0.236	0.063	1.353e-13	3.1	pfdn1
si:ch211-199g17.2	9.69559e-18	0.253646	0.624	0.294	1.45027e-13	3.1	si:ch211-199g17.2
fgfr1a	1.26777e-17	0.118611	0.135	0.022	1.89633e-13	3.1	fgfr1a
CU638714.1	1.3137e-17	0.142581	0.16	0.032	1.96503e-13	3.1	CU638714.1
hoxa3a	1.48569e-17	0.156441	0.211	0.054	2.2223e-13	3.1	hoxa3a
romo1	1.60612e-17	0.395354	0.776	0.485	2.40244e-13	3.1	romo1
tmem238a	1.80069e-17	0.157801	0.219	0.058	2.69348e-13	3.1	tmem238a
ablim1b	1.88868e-17	0.142662	0.177	0.039	2.82509e-13	3.1	ablim1b
ets2	2.68579e-17	0.155065	0.16	0.032	4.0174e-13	3.1	ets2
ankrd22	2.8215e-17	0.105639	0.118	0.017	4.2204e-13	3.1	ankrd22
si:dkey-16l2.16	3.91821e-17	0.171553	0.177	0.039	5.86085e-13	3.1	si:dkey-16l2.16
nme3	5.6261e-17	0.167615	0.245	0.069	8.41552e-13	3.1	nme3
vps28	6.41577e-17	0.136998	0.211	0.054	9.5967e-13	3.1	vps28
gsto2	7.9878e-17	0.152205	0.194	0.047	1.19482e-12	3.1	gsto2
rgs12b	8.23496e-17	0.166452	0.266	0.085	1.23178e-12	3.1	rgs12b
mmp2	9.19895e-17	0.346587	0.755	0.439	1.37598e-12	3.1	mmp2
znf703	9.33225e-17	0.141197	0.219	0.06	1.39592e-12	3.1	znf703
nupr1a	1.53119e-16	0.194452	0.409	0.157	2.29036e-12	3.1	nupr1a
zbtb20	1.54653e-16	0.285768	0.578	0.322	2.31329e-12	3.1	zbtb20
prr13	1.57059e-16	0.191603	0.325	0.113	2.34928e-12	3.1	prr13
arl6ip5b	1.89977e-16	0.208038	0.308	0.112	2.84168e-12	3.1	arl6ip5b
rpl72	2.08675e-16	0.186667	1	0.997	3.12136e-12	3.1	rpl7
mapk12a	2.1598e-16	0.137952	0.186	0.045	3.23062e-12	3.1	mapk12a
cux1a	2.22502e-16	0.226166	0.46	0.212	3.32819e-12	3.1	cux1a
hmgn2	2.34882e-16	0.2984	0.722	0.399	3.51336e-12	3.1	hmgn2
rpl5b1	2.64505e-16	0.307459	0.941	0.742	3.95646e-12	3.1	rpl5b
uqcc3	3.18616e-16	0.109382	0.105	0.014	4.76586e-12	3.1	uqcc3
ogt.1.1	3.36059e-16	0.151827	0.173	0.04	5.02676e-12	3.1	ogt.1.1
rps4x	3.68619e-16	0.224485	0.992	0.97	5.5138e-12	3.1	rps4x
eef1da1	4.91427e-16	0.340778	0.684	0.37	7.35076e-12	3.1	eef1da
mxb	5.2774e-16	0.167455	0.198	0.052	7.89393e-12	3.1	mxb
smad3a	5.53967e-16	0.189663	0.291	0.102	8.28624e-12	3.1	smad3a
aimp2	5.89903e-16	0.151772	0.228	0.065	8.82377e-12	3.1	aimp2
igfbp5b	6.16663e-16	0.237406	0.401	0.166	9.22405e-12	3.1	igfbp5b
sfpq	6.63934e-16	0.168187	0.232	0.067	9.93113e-12	3.1	sfpq
BX936337.1	7.842e-16	0.20747	0.308	0.108	1.17301e-11	3.1	BX936337.1
gpc4	9.53052e-16	0.308624	0.603	0.347	1.42557e-11	3.1	gpc4
krt91	9.67837e-16	0.21813	0.068	0.004	1.44769e-11	3.1	krt91
si:ch211-218c6.8	9.93067e-16	0.107808	0.148	0.029	1.48543e-11	3.1	si:ch211-218c6.8
rpl32	9.9636e-16	0.182984	1	0.999	1.49035e-11	3.1	rpl32
myh9a	1.27052e-15	0.112847	0.122	0.02	1.90045e-11	3.1	myh9a
h1fx	1.34203e-15	0.40914	0.641	0.355	2.00741e-11	3.1	h1fx
epdl1	1.44551e-15	0.137894	0.211	0.059	2.1622e-11	3.1	epdl1
dusp21	1.74827e-15	0.589997	0.629	0.399	2.61506e-11	3.1	dusp2
nfkbiab	2.00459e-15	0.225899	0.515	0.239	2.99846e-11	3.1	nfkbiab
rpl7a	2.22253e-15	0.194056	1	0.994	3.32446e-11	3.1	rpl7a
fam107b	2.50599e-15	0.12938	0.211	0.059	3.74846e-11	3.1	fam107b
ak2	2.53698e-15	0.203327	0.359	0.137	3.79482e-11	3.1	ak2
tfpia	2.7391e-15	0.119335	0.093	0.012	4.09714e-11	3.1	tfpia
rpl271	3.35345e-15	0.194117	1	0.994	5.01608e-11	3.1	rpl27
tpi1b	3.78541e-15	0.213012	0.295	0.104	5.66222e-11	3.1	tpi1b
znf503	4.05501e-15	0.105149	0.11	0.017	6.06549e-11	3.1	znf503
f3a	5.30231e-15	0.105149	0.105	0.016	7.93119e-11	3.1	f3a
mgst1.1	1.208e-14	0.194791	0.312	0.124	1.80693e-10	3.1	mgst1.1
zgc:194655	1.51157e-14	0.135059	0.16	0.038	2.261e-10	3.1	zgc:194655
fstl1b	1.60347e-14	0.203335	0.27	0.099	2.39847e-10	3.1	fstl1b
gpx1a	1.66704e-14	0.162255	0.198	0.055	2.49355e-10	3.1	gpx1a
itm2cb	1.74383e-14	0.107143	0.063	0.004	2.60843e-10	3.1	itm2cb
ifi45	1.75178e-14	0.339755	0.565	0.299	2.62031e-10	3.1	ifi45
arpc4	1.81032e-14	0.15137	0.241	0.076	2.70787e-10	3.1	arpc4
ybx1	1.93789e-14	0.282939	0.97	0.872	2.89869e-10	3.1	ybx1
tmem30ab	2.25581e-14	0.252769	0.409	0.194	3.37425e-10	3.1	tmem30ab
rpl39	2.31896e-14	0.217219	1	0.998	3.4687e-10	3.1	rpl39
sarnp	2.521e-14	0.13805	0.173	0.044	3.77091e-10	3.1	sarnp
smim15	2.54268e-14	0.10493	0.127	0.024	3.80334e-10	3.1	smim15
tmem88b	2.78622e-14	0.142223	0.152	0.035	4.16762e-10	3.1	tmem88b
n4bp1	3.10209e-14	0.175317	0.245	0.084	4.6401e-10	3.1	n4bp1
si:ch211-286b5.5	3.17039e-14	0.222438	0.612	0.308	4.74227e-10	3.1	si:ch211-286b5.5
cct6a	3.25166e-14	0.227013	0.489	0.228	4.86384e-10	3.1	cct6a
eppk1	3.68358e-14	0.281764	0.46	0.24	5.5099e-10	3.1	eppk1
rpl11	4.02779e-14	0.183373	1	0.998	6.02477e-10	3.1	rpl11
si:ch73-335l21.41	4.14284e-14	0.44874	0.705	0.454	6.19686e-10	3.1	si:ch73-335l21.4
rsad2	5.28276e-14	0.41194	0.257	0.092	7.90196e-10	3.1	rsad2
axin2	7.2582e-14	0.201316	0.397	0.183	1.08568e-09	3.1	axin2
lgals9l3	8.49075e-14	0.206843	0.414	0.197	1.27005e-09	3.1	lgals9l3
fmnl2a	9.36096e-14	0.12825	0.194	0.057	1.40021e-09	3.1	fmnl2a
znfx1	9.66772e-14	0.114924	0.169	0.044	1.4461e-09	3.1	znfx1
plecb	9.93547e-14	0.184504	0.287	0.112	1.48615e-09	3.1	plecb
ptprsa.1	9.9732e-14	0.11797	0.177	0.049	1.49179e-09	3.1	ptprsa.1
CT956002.2	1.15357e-13	0.131796	0.203	0.061	1.72551e-09	3.1	CT956002.2
rps3a2	1.1685e-13	0.18006	1	0.998	1.74784e-09	3.1	rps3a
cpn1.1	1.25385e-13	0.12657	0.173	0.045	1.8755e-09	3.1	cpn1.1
si:ch1073-291c23.2	1.25464e-13	0.149407	0.16	0.041	1.87669e-09	3.1	si:ch1073-291c23.2
ldlrap1a	1.29654e-13	0.107298	0.169	0.043	1.93936e-09	3.1	ldlrap1a
sept7b	1.34225e-13	0.124938	0.194	0.055	2.00773e-09	3.1	sept7b
fmnl3	1.34409e-13	0.168584	0.283	0.109	2.0105e-09	3.1	fmnl3
pbxip1b	1.37562e-13	0.186093	0.274	0.101	2.05765e-09	3.1	pbxip1b
slc48a1b	1.3858e-13	0.123151	0.139	0.031	2.07287e-09	3.1	slc48a1b
ywhag1	2.05675e-13	0.144375	0.19	0.056	3.07649e-09	3.1	ywhag1
smox	2.6048e-13	0.14033	0.194	0.059	3.89627e-09	3.1	smox
fkbp1b1	2.90567e-13	0.26485	0.688	0.445	4.3463e-09	3.1	fkbp1b
zgc:152774	3.06034e-13	0.105016	0.127	0.027	4.57766e-09	3.1	zgc:152774
si:ch211-212k18.7	3.17603e-13	0.198131	0.498	0.236	4.75071e-09	3.1	si:ch211-212k18.7
nudcd2	3.29758e-13	0.151015	0.173	0.047	4.93252e-09	3.1	nudcd2
fblim1	3.39937e-13	0.178045	0.312	0.13	5.08477e-09	3.1	fblim1
pik3c2a	4.03722e-13	0.217166	0.43	0.214	6.03888e-09	3.1	pik3c2a
selenoh	4.51051e-13	0.167127	0.177	0.049	6.74682e-09	3.1	selenoh
flna	5.30544e-13	0.212828	0.367	0.157	7.93587e-09	3.1	flna
gatc	5.32224e-13	0.100615	0.127	0.027	7.96101e-09	3.1	gatc
atp2b4	5.34179e-13	0.197722	0.54	0.267	7.99026e-09	3.1	atp2b4
cct8	5.7541e-13	0.154021	0.228	0.076	8.60699e-09	3.1	cct8
fthl271	6.24423e-13	0.217445	0.979	0.865	9.34012e-09	3.1	fthl27
hmgb1a	7.59799e-13	0.212679	0.582	0.304	1.13651e-08	3.1	hmgb1a
celf2	8.3287e-13	0.141715	0.219	0.074	1.24581e-08	3.1	celf2
sh3gl3b	9.33308e-13	0.155471	0.363	0.151	1.39604e-08	3.1	sh3gl3b
faua2	9.38389e-13	0.187351	1	0.988	1.40364e-08	3.1	faua
eif5a	1.00568e-12	0.303722	0.641	0.363	1.5043e-08	3.1	eif5a
rrbp1a	1.03271e-12	0.14444	0.219	0.073	1.54473e-08	3.1	rrbp1a
mbd3a	1.16569e-12	0.112927	0.186	0.054	1.74363e-08	3.1	mbd3a
naca1	1.21534e-12	0.173157	1	0.983	1.8179e-08	3.1	naca
acsl1a	1.23582e-12	0.105149	0.097	0.017	1.84854e-08	3.1	acsl1a
ppid	1.3542e-12	0.117881	0.139	0.033	2.02561e-08	3.1	ppid
mcl1b	1.52452e-12	0.194372	0.574	0.297	2.28038e-08	3.1	mcl1b
huwe1	1.72371e-12	0.121918	0.203	0.063	2.57833e-08	3.1	huwe1
pabpc1a1	1.81566e-12	0.309585	0.802	0.568	2.71586e-08	3.1	pabpc1a
ssr2	1.92649e-12	0.205896	0.557	0.283	2.88165e-08	3.1	ssr2
tmsb	2.10016e-12	0.144993	0.11	0.022	3.14142e-08	3.1	tmsb
fgfr4	2.11646e-12	0.120173	0.333	0.135	3.1658e-08	3.1	fgfr4
cct2.1	2.13242e-12	0.195468	0.477	0.231	3.18967e-08	3.1	cct2.1
boc	2.41357e-12	0.17856	0.27	0.109	3.61021e-08	3.1	boc
ist1	2.54346e-12	0.103433	0.152	0.039	3.80451e-08	3.1	ist1
plekhg2	2.55873e-12	0.113029	0.181	0.055	3.82735e-08	3.1	plekhg2
ube2e3	2.59927e-12	0.193813	0.646	0.343	3.88798e-08	3.1	ube2e3
CABZ01087560.1	2.6964e-12	0.117439	0.245	0.085	4.03328e-08	3.1	CABZ01087560.1
arpc1b	2.81991e-12	0.104152	0.135	0.032	4.21802e-08	3.1	arpc1b
zfp36l1b	3.12545e-12	0.267466	0.662	0.391	4.67504e-08	3.1	zfp36l1b
zgc:92818	3.31454e-12	0.117439	0.211	0.068	4.95789e-08	3.1	zgc:92818
tfe3a	4.05613e-12	0.164031	0.308	0.133	6.06716e-08	3.1	tfe3a
tmem256	4.51516e-12	0.162962	0.321	0.133	6.75377e-08	3.1	tmem256
eif3i	5.10669e-12	0.163972	0.354	0.152	7.63859e-08	3.1	eif3i
ugt1b5	5.22566e-12	0.118308	0.181	0.056	7.81655e-08	3.1	ugt1b5
si:ch73-46j18.5	6.41011e-12	0.241668	0.498	0.263	9.58825e-08	3.1	si:ch73-46j18.5
BX000534.1	6.99813e-12	0.140834	0.122	0.028	1.04678e-07	3.1	BX000534.1
pdgfd	7.15597e-12	0.127769	0.173	0.053	1.07039e-07	3.1	pdgfd
smdt1b	7.46134e-12	0.137244	0.215	0.072	1.11607e-07	3.1	smdt1b
hoxd9a	7.98149e-12	0.106166	0.127	0.03	1.19387e-07	3.1	hoxd9a
ucp2	9.53992e-12	0.131903	0.181	0.055	1.42698e-07	3.1	ucp2
spred2b	9.67182e-12	0.107755	0.16	0.046	1.44671e-07	3.1	spred2b
tgm1l1	1.10202e-11	0.127283	0.198	0.067	1.6484e-07	3.1	tgm1l1
ak1	1.13399e-11	0.145267	0.177	0.055	1.69622e-07	3.1	ak1
sema6d	1.18781e-11	0.101201	0.152	0.042	1.77672e-07	3.1	sema6d
cib1	1.22013e-11	0.101454	0.181	0.055	1.82507e-07	3.1	cib1
mical3b	1.29643e-11	0.115896	0.181	0.058	1.93921e-07	3.1	mical3b
rnd3b	1.48764e-11	0.103397	0.181	0.057	2.22521e-07	3.1	rnd3b
nr0b1	1.67523e-11	0.148203	0.245	0.093	2.50581e-07	3.1	nr0b1
eif3f1	1.71407e-11	0.252427	0.84	0.609	2.56391e-07	3.1	eif3f
eif3ea	1.91126e-11	0.25268	0.684	0.404	2.85887e-07	3.1	eif3ea
rsl1d1	2.14688e-11	0.172747	0.384	0.176	3.2113e-07	3.1	rsl1d1
ssr3	2.63273e-11	0.2287	0.637	0.362	3.93804e-07	3.1	ssr3
eif3c	2.68215e-11	0.147305	0.426	0.198	4.01196e-07	3.1	eif3c
sorl1	2.86144e-11	0.137391	0.266	0.109	4.28014e-07	3.1	sorl1
vgll4b	3.06814e-11	0.128333	0.228	0.086	4.58932e-07	3.1	vgll4b
srgap2	3.94522e-11	0.155227	0.3	0.133	5.90126e-07	3.1	srgap2
p4hb	4.18179e-11	0.133805	0.211	0.072	6.25512e-07	3.1	p4hb
zgc:153867	4.18476e-11	0.281354	0.823	0.558	6.25957e-07	3.1	zgc:153867
rps171	4.45754e-11	0.285517	0.869	0.632	6.66759e-07	3.1	rps17
eef1a1l2	4.6682e-11	0.124036	1	1	6.98269e-07	3.1	eef1a1l2
ddx39aa	5.21523e-11	0.135136	0.241	0.089	7.80095e-07	3.1	ddx39aa
chmp5b	6.21551e-11	0.144239	0.287	0.117	9.29716e-07	3.1	chmp5b
tspan3a	7.98094e-11	0.166539	0.443	0.217	1.19379e-06	3.1	tspan3a
sptan1	8.24454e-11	0.156229	0.249	0.097	1.23322e-06	3.1	sptan1
srrm1	8.55844e-11	0.182526	0.426	0.209	1.28017e-06	3.1	srrm1
ywhaqa	8.77871e-11	0.235732	0.532	0.29	1.31312e-06	3.1	ywhaqa
rpl26	8.87741e-11	0.178926	0.278	0.118	1.32788e-06	3.1	rpl26
syne2b	9.27001e-11	0.115452	0.169	0.054	1.38661e-06	3.1	syne2b
mgst3b	1.07365e-10	0.239866	0.759	0.48	1.60597e-06	3.1	mgst3b
ddx6	1.17238e-10	0.15009	0.266	0.104	1.75365e-06	3.1	ddx6
CU984600.2	1.22952e-10	0.177182	0.241	0.096	1.83912e-06	3.1	CU984600.2
plscr3b	1.45725e-10	0.123933	0.224	0.082	2.17975e-06	3.1	plscr3b
zgc:56304	1.71391e-10	0.114108	0.232	0.086	2.56367e-06	3.1	zgc:56304
gstr	1.73917e-10	0.208283	0.57	0.313	2.60145e-06	3.1	gstr
krtcap2	1.87056e-10	0.183767	0.397	0.193	2.79798e-06	3.1	krtcap2
adh8b	1.95412e-10	0.169447	0.207	0.078	2.92297e-06	3.1	adh8b
ciarta	1.97885e-10	0.139072	0.274	0.113	2.95997e-06	3.1	ciarta
ptmab	2.01105e-10	0.263175	0.722	0.458	3.00813e-06	3.1	ptmab
bsg	2.06532e-10	0.221464	0.654	0.374	3.0893e-06	3.1	bsg
pbx4	2.31555e-10	0.171698	0.376	0.179	3.4636e-06	3.1	pbx4
zgc:113208	2.70215e-10	0.119742	0.19	0.068	4.04187e-06	3.1	zgc:113208
syf2	2.79608e-10	0.143469	0.397	0.191	4.18237e-06	3.1	syf2
mxi1	2.88432e-10	0.118198	0.207	0.078	4.31436e-06	3.1	mxi1
arap3	3.02891e-10	0.101878	0.131	0.037	4.53064e-06	3.1	arap3
fam133b	3.33963e-10	0.143299	0.241	0.095	4.99543e-06	3.1	fam133b
med19a	3.33996e-10	0.101981	0.169	0.054	4.99591e-06	3.1	med19a
smc3	3.39987e-10	0.10392	0.156	0.048	5.08553e-06	3.1	smc3
kdm1a	3.4741e-10	0.106804	0.16	0.05	5.19656e-06	3.1	kdm1a
prkd2	3.56196e-10	0.132871	0.27	0.117	5.32798e-06	3.1	prkd2
srsf7a	3.78024e-10	0.130463	0.295	0.124	5.65448e-06	3.1	srsf7a
grb2b	4.59247e-10	0.10428	0.181	0.061	6.86942e-06	3.1	grb2b
capns1b	4.63642e-10	0.193507	0.586	0.325	6.93516e-06	3.1	capns1b
dpyda.1	4.85776e-10	0.117782	0.203	0.076	7.26624e-06	3.1	dpyda.1
usp6nl	5.01769e-10	0.155415	0.232	0.097	7.50547e-06	3.1	usp6nl
cbr1l	5.20581e-10	0.113562	0.143	0.043	7.78685e-06	3.1	cbr1l
nenf	6.05272e-10	0.103734	0.169	0.055	9.05365e-06	3.1	nenf
zgc:152658	7.56502e-10	0.111754	0.165	0.055	1.13158e-05	3.1	zgc:152658
gtf2f1	8.18012e-10	0.100355	0.148	0.045	1.22358e-05	3.1	gtf2f1
gpd1c	8.71985e-10	0.104034	0.169	0.058	1.30432e-05	3.1	gpd1c
ube2ib	9.28704e-10	0.108246	0.287	0.122	1.38916e-05	3.1	ube2ib
cd63	9.76978e-10	0.177653	0.684	0.414	1.46136e-05	3.1	cd63
pabpn1	1.11471e-09	0.207849	0.536	0.302	1.66739e-05	3.1	pabpn1
cirbpb	1.22334e-09	0.292879	0.831	0.64	1.82988e-05	3.1	cirbpb
akt1s1	1.30656e-09	0.122064	0.253	0.105	1.95435e-05	3.1	akt1s1
scarb2a	1.33498e-09	0.148419	0.3	0.142	1.99686e-05	3.1	scarb2a
ube2l3a	1.39683e-09	0.106508	0.224	0.086	2.08938e-05	3.1	ube2l3a
meaf6	1.46281e-09	0.107572	0.228	0.089	2.18808e-05	3.1	meaf6
tjp2b1	1.47648e-09	0.16062	0.35	0.167	2.20852e-05	3.1	tjp2b
timp2a1	1.6543e-09	0.140289	0.447	0.225	2.4745e-05	3.1	timp2a
sri	1.88222e-09	0.128438	0.329	0.151	2.81543e-05	3.1	sri
btf31	2.11155e-09	0.246289	0.92	0.766	3.15846e-05	3.1	btf3
shc1	2.2751e-09	0.141166	0.266	0.122	3.40309e-05	3.1	shc1
zgc:163098	2.35529e-09	0.105751	0.173	0.062	3.52304e-05	3.1	zgc:163098
vps35	2.51815e-09	0.102282	0.207	0.079	3.76665e-05	3.1	vps35
trappc1	2.54513e-09	0.135128	0.224	0.09	3.807e-05	3.1	trappc1
polr2f	2.82243e-09	0.106822	0.186	0.067	4.22178e-05	3.1	polr2f
ctnnb2	3.07752e-09	0.151736	0.325	0.154	4.60335e-05	3.1	ctnnb2
rplp12	3.09216e-09	0.147991	1	0.998	4.62525e-05	3.1	rplp1
arhgdia	3.59911e-09	0.132911	0.312	0.144	5.38355e-05	3.1	arhgdia
stat1b	3.8225e-09	0.144392	0.262	0.117	5.7177e-05	3.1	stat1b
nr5a1b	5.28089e-09	0.109656	0.169	0.061	7.89915e-05	3.1	nr5a1b
myl9b1	5.45616e-09	0.135822	0.565	0.309	8.16133e-05	3.1	myl9b
rnf213a	5.69213e-09	0.161384	0.637	0.383	8.51429e-05	3.1	rnf213a
pfdn4	5.95629e-09	0.125551	0.181	0.067	8.90942e-05	3.1	pfdn4
eif3k	5.99391e-09	0.138754	0.456	0.238	8.96569e-05	3.1	eif3k
eif3ha	6.07842e-09	0.172235	0.468	0.255	9.0921e-05	3.1	eif3ha
rbbp6	6.16385e-09	0.106626	0.316	0.146	9.21989e-05	3.1	rbbp6
lrch4	6.54607e-09	0.113634	0.152	0.053	9.79162e-05	3.1	lrch4
mtap	7.33979e-09	0.126599	0.198	0.077	0.000109789	3.1	mtap
eif3m1	7.7318e-09	0.224121	0.722	0.45	0.000115652	3.1	eif3m
tgif1	8.03018e-09	0.123522	0.418	0.213	0.000120115	3.1	tgif1
rps52	8.16962e-09	0.134101	1	0.997	0.000122201	3.1	rps5
uchl1	8.50205e-09	0.13266	0.131	0.04	0.000127174	3.1	uchl1
bcl2l10	9.18012e-09	0.108478	0.181	0.067	0.000137316	3.1	bcl2l10
nsa2	9.69854e-09	0.245421	0.734	0.486	0.000145071	3.1	nsa2
pcf11	9.83637e-09	0.118284	0.241	0.102	0.000147132	3.1	pcf11
cbx7a	1.28305e-08	0.125288	0.253	0.11	0.000191919	3.1	cbx7a
hmgn7	1.41433e-08	0.227717	0.793	0.527	0.000211555	3.1	hmgn7
calm2a	1.59034e-08	0.173085	0.333	0.167	0.000237884	3.1	calm2a
si:dkey-180p18.9	1.75136e-08	0.125476	0.325	0.158	0.000261968	3.1	si:dkey-180p18.9
hist2h2l	1.77914e-08	0.140561	0.46	0.253	0.000266124	3.1	hist2h2l
akap8l	1.83417e-08	0.106209	0.186	0.07	0.000274356	3.1	akap8l
cast	1.84939e-08	0.124445	0.3	0.14	0.000276632	3.1	cast
myo1ca	2.08892e-08	0.128277	0.266	0.127	0.00031246	3.1	myo1ca
arpc3	2.11897e-08	0.153492	0.451	0.249	0.000316955	3.1	arpc3
b2ml	2.25022e-08	0.16977	0.979	0.936	0.000336588	3.1	b2ml
ube2na	2.84902e-08	0.110404	0.203	0.081	0.000426156	3.1	ube2na
kdm6bb	2.95281e-08	0.122266	0.266	0.128	0.000441682	3.1	kdm6bb
dctn3	3.12159e-08	0.114512	0.266	0.12	0.000466927	3.1	dctn3
dut	3.36773e-08	0.116392	0.084	0.02	0.000503745	3.1	dut
cox6a2	4.01745e-08	0.18552	0.62	0.381	0.00060093	3.1	cox6a2
cadm4	4.04102e-08	0.10528	0.198	0.083	0.000604455	3.1	cadm4
cnp	4.81837e-08	0.175618	0.494	0.277	0.000720731	3.1	cnp
rab11fip4b	5.20417e-08	0.128162	0.262	0.127	0.00077844	3.1	rab11fip4b
dusp8a	5.3209e-08	0.102663	0.169	0.066	0.0007959	3.1	dusp8a
egr4	5.86923e-08	0.221952	0.084	0.02	0.000877919	3.1	egr4
itga6b	6.44832e-08	0.142052	0.232	0.11	0.00096454	3.1	itga6b
naa10	6.54472e-08	0.108093	0.253	0.116	0.00097896	3.1	naa10
gabarapl2	6.61692e-08	0.105854	0.308	0.15	0.000989758	3.1	gabarapl2
actb2	9.4276e-08	0.19564	0.996	0.991	0.00141018	3.1	actb2
ftr14	1.17727e-07	0.121629	0.19	0.082	0.00176096	3.1	ftr14
snrpf	1.23566e-07	0.173667	0.346	0.183	0.0018483	3.1	snrpf
ier51	1.37801e-07	0.259128	0.734	0.562	0.00206123	3.1	ier5
rpl291	1.47311e-07	0.221358	0.937	0.766	0.00220347	3.1	rpl29
tpm3	1.56182e-07	0.162963	0.582	0.348	0.00233616	3.1	tpm3
zbtb4	1.67417e-07	0.144082	0.316	0.174	0.00250422	3.1	zbtb4
calr	1.72409e-07	0.112859	0.198	0.088	0.00257889	3.1	calr
fosb2	1.74234e-07	0.267165	0.89	0.832	0.0026062	3.1	fosb
ctnnd1	1.79714e-07	0.131855	0.325	0.165	0.00268816	3.1	ctnnd1
eif3g	2.12328e-07	0.17905	0.667	0.445	0.003176	3.1	eif3g
rap1b	2.39622e-07	0.120991	0.266	0.13	0.00358426	3.1	rap1b
lhfpl2a	2.44207e-07	0.10853	0.232	0.111	0.00365286	3.1	lhfpl2a
irs1	2.9406e-07	0.14161	0.329	0.187	0.00439856	3.1	irs1
arrdc3b	3.20612e-07	0.111487	0.203	0.089	0.00479572	3.1	arrdc3b
vamp3	3.92851e-07	0.1476	0.574	0.35	0.00587627	3.1	vamp3
sub1a	4.30849e-07	0.142581	0.477	0.272	0.00644464	3.1	sub1a
tmem50a	4.50437e-07	0.10097	0.392	0.211	0.00673764	3.1	tmem50a
pin1	4.56491e-07	0.10118	0.249	0.117	0.00682819	3.1	pin1
acin1a	4.91417e-07	0.150685	0.485	0.284	0.00735062	3.1	acin1a
pdlim1	5.05466e-07	0.108255	0.283	0.14	0.00756076	3.1	pdlim1
mhc1zba	5.08312e-07	0.170223	0.911	0.78	0.00760333	3.1	mhc1zba
foxj3	5.41609e-07	0.126378	0.249	0.127	0.00810138	3.1	foxj3
ppp1r10	5.53455e-07	0.139235	0.249	0.127	0.00827858	3.1	ppp1r10
aplp2	5.59618e-07	0.142205	0.561	0.34	0.00837077	3.1	aplp2
GCA	5.60737e-07	0.106586	0.308	0.158	0.00838751	3.1	GCA
vat11	5.86087e-07	0.208938	0.54	0.336	0.00876669	3.1	vat1
ralab	5.97576e-07	0.121836	0.409	0.245	0.00893855	3.1	ralab
egr11	6.17096e-07	0.312433	0.747	0.657	0.00923053	3.1	egr1
si:ch73-380l3.4	6.60375e-07	0.144502	0.278	0.152	0.00987789	3.1	si:ch73-380l3.4
prpf6	7.27421e-07	0.127395	0.194	0.09	0.0108808	3.1	prpf6
slka	8.59908e-07	0.175002	0.304	0.179	0.0128625	3.1	slka
xaf1	9.13777e-07	0.152434	0.308	0.174	0.0136683	3.1	xaf1
jdp2b2	1.10743e-06	0.28001	0.899	0.824	0.016565	3.1	jdp2b
grb10b	1.2406e-06	0.116714	0.236	0.121	0.0185569	3.1	grb10b
mibp21	1.26863e-06	0.17741	0.591	0.364	0.0189762	3.1	mibp2
col1a1b	1.39245e-06	0.110738	0.093	0.029	0.0208283	3.1	col1a1b
grb10a	1.42401e-06	0.117287	0.329	0.189	0.0213003	3.1	grb10a
rnf213b	1.5421e-06	0.116252	0.274	0.147	0.0230667	3.1	rnf213b
nfkb2	1.91021e-06	0.116381	0.198	0.094	0.028573	3.1	nfkb2
nid1b	1.95401e-06	0.118858	0.08	0.023	0.0292281	3.1	nid1b
trim105	1.96896e-06	0.100159	0.207	0.101	0.0294517	3.1	trim105
pcna	2.00493e-06	0.13611	0.093	0.029	0.0299898	3.1	pcna
tax1bp3	2.32699e-06	0.103246	0.207	0.099	0.0348071	3.1	tax1bp3
dusp51	2.33917e-06	0.131552	0.139	0.055	0.0349893	3.1	dusp5
eif3d	3.84464e-06	0.137035	0.591	0.375	0.0575081	3.1	eif3d
dusp6	5.20089e-06	0.132282	0.245	0.131	0.0777949	3.1	dusp6
vamp8	5.97373e-06	0.104018	0.219	0.115	0.089355	3.1	vamp8
si:ch211-288g17.3	6.19537e-06	0.159991	0.405	0.247	0.0926704	3.1	si:ch211-288g17.3
ccng1	6.42635e-06	0.159912	0.608	0.395	0.0961254	3.1	ccng1
cirbpa1	6.90845e-06	0.153844	0.616	0.379	0.103337	3.1	cirbpa
fubp1	7.38136e-06	0.111186	0.224	0.113	0.11041	3.1	fubp1
znf706	1.02035e-05	0.114196	0.325	0.183	0.152625	3.1	znf706
txndc9	1.37739e-05	0.11225	0.224	0.116	0.206031	3.1	txndc9
lsp1	1.40764e-05	0.123372	0.363	0.231	0.210555	3.1	lsp1
eif2s31	1.41085e-05	0.102977	0.489	0.303	0.211035	3.1	eif2s3
CU104709.1	1.43094e-05	0.116177	0.241	0.134	0.214041	3.1	CU104709.1
ahr2	1.54006e-05	0.109028	0.249	0.141	0.230362	3.1	ahr2
rsrp11	1.62431e-05	0.164631	0.612	0.441	0.242965	3.1	rsrp1
fkbp1aa	1.84288e-05	0.166556	0.684	0.475	0.275658	3.1	fkbp1aa
eif3ba1	2.56014e-05	0.111597	0.451	0.285	0.382946	3.1	eif3ba
wu:fj29h11	2.68133e-05	0.142598	0.304	0.184	0.401073	3.1	wu:fj29h11
auts2a	5.08173e-05	0.110123	0.287	0.179	0.760125	3.1	auts2a
cebpb2	5.94123e-05	0.223161	0.662	0.537	0.888689	3.1	cebpb
btg11	6.32363e-05	0.137356	0.848	0.689	0.945888	3.1	btg1
rpl5a1	6.89933e-05	0.176896	0.869	0.728	1	3.1	rpl5a
isg15	7.30103e-05	0.121119	0.616	0.451	1	3.1	isg15
arhgef1b	0.000169258	0.133884	0.371	0.259	1	3.1	arhgef1b
si:ch211-39k3.2	0.000215411	0.10858	0.236	0.145	1	3.1	si:ch211-39k3.2
zgc:195173	0.000215722	0.135019	0.392	0.279	1	3.1	zgc:195173
atp6v0e1	0.00022733	0.106642	0.751	0.527	1	3.1	atp6v0e1
pde4ba	0.000243385	0.152661	0.722	0.591	1	3.1	pde4ba
hnrnpa0a	0.000271173	0.114187	0.262	0.166	1	3.1	hnrnpa0a
h1f0	0.000310024	0.154379	0.768	0.606	1	3.1	h1f0
rnd1b	0.000807938	0.103115	0.203	0.124	1	3.1	rnd1b
hsp90aa1.22	0.000947391	0.229362	0.709	0.63	1	3.1	hsp90aa1.2
si:dkey-241l7.4	0.00145277	0.142931	0.068	0.028	1	3.1	si:dkey-241l7.4
nme2b.11	0.0016218	0.109953	0.987	0.981	1	3.1	nme2b.1
jund1	0.00200462	0.107479	0.637	0.507	1	3.1	jund
si:dkey-37o8.1	0.00263836	0.125709	0.068	0.029	1	3.1	si:dkey-37o8.1
org	0.0059491	0.106746	0.097	0.051	1	3.1	org
ier2b2	0.00833404	0.116285	0.802	0.735	1	3.1	ier2b

## Sheet: Pre-follicle Cell SC3.2
Pre-follicle	p_val	avg_logFC	pct.1	pct.2	p_val_adj	cluster	gene
fgfr41	8.23275e-189	1.43338	0.849	0.075	1.23145e-184	3.2	fgfr4
pcolceb	6.48011e-163	1.20106	0.724	0.054	9.69295e-159	3.2	pcolceb
fgfr31	2.07763e-124	1.19593	0.744	0.102	3.10772e-120	3.2	fgfr3
fat2	3.3843e-101	0.607622	0.472	0.035	5.06224e-97	3.2	fat2
cdh41	3.68565e-90	0.911259	0.709	0.13	5.513e-86	3.2	cdh4
fhl1b	2.61136e-88	0.622385	0.503	0.056	3.90608e-84	3.2	fhl1b
gstm.3	4.97695e-82	1.27364	0.714	0.168	7.44452e-78	3.2	gstm.3
etv4	1.96607e-78	0.371073	0.327	0.017	2.94085e-74	3.2	etv4
bmp6	8.12664e-68	0.642194	0.462	0.064	1.21558e-63	3.2	bmp6
ace1	1.79906e-67	0.540461	0.447	0.059	2.69104e-63	3.2	ace
krt941	1.40754e-66	1.11739	0.628	0.141	2.10539e-62	3.2	krt94
fgfrl1a1	5.63814e-63	0.481392	0.427	0.058	8.43353e-59	3.2	fgfrl1a
inka1a	1.39005e-62	0.439386	0.342	0.033	2.07923e-58	3.2	inka1a
spry4	8.03396e-62	0.451739	0.307	0.024	1.20172e-57	3.2	spry4
hpn1	6.86574e-59	0.614679	0.593	0.139	1.02698e-54	3.2	hpn
zgc:928181	2.25711e-58	0.5965	0.382	0.05	3.37619e-54	3.2	zgc:92818
slc4a4a1	5.37666e-57	0.674997	0.683	0.159	8.04241e-53	3.2	slc4a4a
rpz5	4.54289e-55	0.771137	1	0.937	6.79526e-51	3.2	rpz5
emilin1a1	7.97934e-55	0.684842	0.693	0.204	1.19355e-50	3.2	emilin1a
zgc:1141811	2.85058e-50	0.694212	0.749	0.246	4.26389e-46	3.2	zgc:114181
zgc:171686	5.38615e-49	0.238208	0.221	0.014	8.0566e-45	3.2	zgc:171686
si:ch73-335l21.42	2.496e-47	1.19464	0.894	0.436	3.73351e-43	3.2	si:ch73-335l21.4
mxra8a1	1.586e-44	0.568621	0.452	0.101	2.37233e-40	3.2	mxra8a
gsdf2	2.30816e-44	0.780775	1	0.953	3.45254e-40	3.2	gsdf
prdx51	4.08273e-44	0.868837	0.633	0.232	6.10695e-40	3.2	prdx5
midn1	4.71384e-43	1.09447	0.598	0.201	7.05096e-39	3.2	midn
ndrg3a	8.65587e-43	0.64685	0.528	0.16	1.29475e-38	3.2	ndrg3a
hbegfb	1.63678e-42	0.293282	0.251	0.026	2.44829e-38	3.2	hbegfb
s100a10b1	2.2987e-41	0.835576	0.94	0.604	3.4384e-37	3.2	s100a10b
nr0b11	3.12667e-41	0.450472	0.392	0.078	4.67687e-37	3.2	nr0b1
nfe2l2a	3.87451e-39	0.606002	0.487	0.138	5.79549e-35	3.2	nfe2l2a
nr5a1b1	1.09789e-38	0.34069	0.302	0.047	1.64222e-34	3.2	nr5a1b
lrrc17	4.04972e-38	0.261336	0.246	0.029	6.05757e-34	3.2	lrrc17
mafa	7.92597e-38	0.180298	0.171	0.011	1.18557e-33	3.2	mafa
parvab	1.79984e-37	0.305707	0.291	0.046	2.6922e-33	3.2	parvab
gpr22a	2.8221e-37	0.221226	0.186	0.014	4.2213e-33	3.2	gpr22a
cfl1l1	7.72475e-37	0.613899	0.573	0.159	1.15547e-32	3.2	cfl1l
cldnc1	8.23232e-37	0.429939	0.392	0.086	1.23139e-32	3.2	cldnc
irx3a1	1.68935e-36	0.479824	0.503	0.14	2.52693e-32	3.2	irx3a
si:dkey-188i13.61	2.1375e-36	0.589499	0.518	0.149	3.19727e-32	3.2	si:dkey-188i13.6
si:ch211-207d6.21	9.83997e-36	0.462483	0.462	0.119	1.47186e-31	3.2	si:ch211-207d6.2
si:ch211-195o20.7	1.31777e-35	0.26638	0.246	0.033	1.97111e-31	3.2	si:ch211-195o20.7
slc16a9b	1.48997e-35	0.307611	0.251	0.034	2.2287e-31	3.2	slc16a9b
fthl272	6.16057e-35	0.555422	0.985	0.867	9.21497e-31	3.2	fthl27
si:ch211-222l21.11	4.68113e-34	0.726897	0.603	0.207	7.00203e-30	3.2	si:ch211-222l21.1
pcp4l11	7.21424e-34	0.245378	0.241	0.033	1.07911e-29	3.2	pcp4l1
icn1	1.20249e-33	0.436869	0.583	0.164	1.79869e-29	3.2	icn
serpinf11	1.42007e-33	0.32216	0.327	0.065	2.12414e-29	3.2	serpinf1
sox9b	1.6458e-33	0.181968	0.171	0.014	2.46179e-29	3.2	sox9b
slc16a10	1.66931e-33	0.293265	0.266	0.043	2.49696e-29	3.2	slc16a10
ptmaa1	2.9378e-33	0.671106	0.975	0.742	4.39435e-29	3.2	ptmaa
nfkbiaa1	3.85857e-33	0.700002	0.462	0.126	5.77164e-29	3.2	nfkbiaa
ahnak1	1.59079e-31	0.680633	0.789	0.452	2.37951e-27	3.2	ahnak
fzd101	2.25731e-31	0.329874	0.322	0.068	3.37648e-27	3.2	fzd10
sik11	5.77218e-31	0.654206	0.528	0.198	8.63403e-27	3.2	sik1
st51	6.05062e-31	0.478093	0.588	0.236	9.05051e-27	3.2	st5
fam184b	2.11482e-30	0.223677	0.241	0.038	3.16334e-26	3.2	fam184b
sulf1	6.86978e-30	0.266843	0.271	0.05	1.02758e-25	3.2	sulf1
irx5a1	1.52344e-29	0.363135	0.447	0.136	2.27876e-25	3.2	irx5a
arrdc3b1	2.00384e-29	0.528401	0.327	0.076	2.99734e-25	3.2	arrdc3b
krt18b1	9.77143e-29	0.73518	0.442	0.136	1.46161e-24	3.2	krt18b
zgc:162707	3.98955e-28	0.126704	0.131	0.009	5.96756e-24	3.2	zgc:162707
f101	8.90531e-28	0.568477	0.643	0.325	1.33206e-23	3.2	f10
flrt3	9.03352e-28	0.20683	0.186	0.023	1.35123e-23	3.2	flrt3
isg151	1.27697e-27	0.983072	0.799	0.432	1.91009e-23	3.2	isg15
fam107b1	7.74859e-27	0.371117	0.266	0.056	1.15903e-22	3.2	fam107b
olfm1b	2.18104e-26	0.171346	0.136	0.011	3.2624e-22	3.2	olfm1b
phyhiplb	2.39543e-26	0.108876	0.106	0.005	3.58309e-22	3.2	phyhiplb
zgc:193505	2.48388e-26	0.20372	0.151	0.015	3.71539e-22	3.2	zgc:193505
nanos11	2.78069e-26	0.591592	0.482	0.183	4.15936e-22	3.2	nanos1
rasl11a1	3.79737e-26	0.221539	0.231	0.041	5.68011e-22	3.2	rasl11a
pde4ba1	4.0416e-26	0.59475	0.849	0.578	6.04543e-22	3.2	pde4ba
cd74a2	4.71522e-26	0.515827	1	0.922	7.05303e-22	3.2	cd74a
F7 (1 of many)	5.98646e-26	0.319408	0.362	0.101	8.95455e-22	3.2	F7 (1 of many)
dchs1a1	8.626e-26	0.291489	0.286	0.065	1.29028e-21	3.2	dchs1a
fgl2a1	1.24232e-25	0.379081	0.342	0.093	1.85826e-21	3.2	fgl2a
si:ch211-198m17.1	7.19955e-25	0.331118	0.352	0.101	1.07691e-20	3.2	si:ch211-198m17.1
atoh81	2.35859e-24	0.345592	0.342	0.093	3.52798e-20	3.2	atoh8
her62	2.37026e-24	0.706726	0.884	0.51	3.54543e-20	3.2	her6
rdh10a	2.77213e-24	0.623014	0.357	0.11	4.14656e-20	3.2	rdh10a
ldlrap1a1	3.39438e-24	0.346261	0.216	0.04	5.07731e-20	3.2	ldlrap1a
si:ch211-117c9.5	3.42308e-24	0.142238	0.126	0.011	5.12024e-20	3.2	si:ch211-117c9.5
neurl1ab1	6.58828e-24	0.265636	0.276	0.064	9.85475e-20	3.2	neurl1ab
ehd2b1	7.42351e-24	0.316533	0.482	0.162	1.11041e-19	3.2	ehd2b
fkbp1aa1	9.23107e-24	0.560379	0.739	0.473	1.38078e-19	3.2	fkbp1aa
epdl11	1.71966e-23	0.258693	0.256	0.057	2.57227e-19	3.2	epdl1
bcam1	3.43188e-23	0.52407	0.945	0.819	5.1334e-19	3.2	bcam
si:ch211-1a19.31	6.79222e-23	0.483403	0.528	0.21	1.01598e-18	3.2	si:ch211-1a19.3
sox5	1.15434e-22	0.103291	0.121	0.011	1.72665e-18	3.2	sox5
ackr3b1	1.89447e-22	0.43565	0.523	0.204	2.83375e-18	3.2	ackr3b
CU459094.2	1.96806e-22	0.165254	0.186	0.03	2.94382e-18	3.2	CU459094.2
hbegfa1	2.93641e-22	0.520992	0.397	0.134	4.39228e-18	3.2	hbegfa
alcamb	3.6306e-22	0.402779	0.452	0.18	5.43065e-18	3.2	alcamb
jam2a	4.04502e-22	0.664139	0.573	0.293	6.05054e-18	3.2	jam2a
cnnm2b1	1.10943e-21	0.39094	0.377	0.133	1.65949e-17	3.2	cnnm2b
fosb3	1.23707e-21	0.63622	0.965	0.824	1.85041e-17	3.2	fosb
zfhx4	1.70456e-21	0.228121	0.236	0.053	2.54968e-17	3.2	zfhx4
atp11a	4.6138e-21	0.200673	0.221	0.047	6.90131e-17	3.2	atp11a
pik3c2a1	4.77151e-21	0.371389	0.482	0.213	7.13723e-17	3.2	pik3c2a
rrbp1a1	1.55082e-20	0.308015	0.266	0.071	2.31971e-16	3.2	rrbp1a
gh1	1.63977e-20	0.11905	0.08	0.004	2.45276e-16	3.2	gh1
fkbp1b2	2.09466e-20	0.435383	0.719	0.447	3.13319e-16	3.2	fkbp1b
jdp2b3	3.09436e-20	0.625547	0.985	0.815	4.62855e-16	3.2	jdp2b
prss1	3.84432e-20	0.200584	0.186	0.034	5.75034e-16	3.2	prss1
egfra	7.68708e-20	0.413951	0.457	0.201	1.14983e-15	3.2	egfra
tmem2561	1.41164e-19	0.433229	0.367	0.131	2.11153e-15	3.2	tmem256
ppdpfb1	1.41607e-19	0.533919	0.518	0.227	2.11816e-15	3.2	ppdpfb
ablim1b1	2.18569e-19	0.194845	0.196	0.04	3.26935e-15	3.2	ablim1b
krt81	4.04656e-19	0.368716	1	0.956	6.05285e-15	3.2	krt8
zgc:1527911	4.2506e-19	0.74936	0.633	0.359	6.35804e-15	3.2	zgc:152791
zgc:926061	8.46372e-19	0.445155	0.392	0.156	1.266e-14	3.2	zgc:92606
c2cd4a	1.05273e-18	0.153715	0.131	0.018	1.57467e-14	3.2	c2cd4a
zgc:1037002	1.64921e-18	0.512456	0.784	0.512	2.46689e-14	3.2	zgc:103700
fstl31	2.24791e-18	0.427567	0.467	0.199	3.36242e-14	3.2	fstl3
irs11	2.42823e-18	0.319468	0.432	0.178	3.63215e-14	3.2	irs1
senp3a	5.30865e-18	0.236069	0.251	0.069	7.94067e-14	3.2	senp3a
pcolce2b	5.44587e-18	0.244817	0.291	0.092	8.14593e-14	3.2	pcolce2b
scn4bb	6.5633e-18	0.231445	0.256	0.072	9.81738e-14	3.2	scn4bb
zgc:92140	8.33256e-18	0.305315	0.322	0.113	1.24638e-13	3.2	zgc:92140
ch25hl3	8.3387e-18	0.360042	0.372	0.139	1.2473e-13	3.2	ch25hl3
CR383676.11	1.75046e-17	0.257157	1	0.999	2.61833e-13	3.2	CR383676.1
FAT4	1.79825e-17	0.155862	0.171	0.034	2.68982e-13	3.2	FAT4
chad	4.1043e-17	0.157313	0.126	0.018	6.13921e-13	3.2	chad
ccl19a.1	4.54355e-17	0.109665	0.156	0.028	6.79624e-13	3.2	ccl19a.1
si:ch211-79k12.11	4.73675e-17	0.408838	0.548	0.288	7.08523e-13	3.2	si:ch211-79k12.1
ccnd11	5.54012e-17	0.354837	0.322	0.114	8.28691e-13	3.2	ccnd1
fn1a	6.49856e-17	0.176485	0.211	0.052	9.72054e-13	3.2	fn1a
b3glctb	1.38499e-16	0.105911	0.101	0.011	2.07167e-12	3.2	b3glctb
epha4a	1.42539e-16	0.11183	0.126	0.019	2.13209e-12	3.2	epha4a
sox11b	1.81016e-16	0.167645	0.095	0.01	2.70763e-12	3.2	sox11b
mpped2a	2.13604e-16	0.219608	0.296	0.099	3.19508e-12	3.2	mpped2a
CR762483.1	3.06325e-16	0.300176	0.121	0.018	4.58202e-12	3.2	CR762483.1
plxna4	4.90774e-16	0.377479	0.518	0.273	7.341e-12	3.2	plxna4
ifi461	5.04654e-16	0.462488	0.884	0.679	7.54862e-12	3.2	ifi46
ctsk1	7.07747e-16	0.271126	0.387	0.157	1.05865e-11	3.2	ctsk
emx21	1.19468e-15	0.469874	0.804	0.627	1.787e-11	3.2	emx2
nfkbiab1	1.38931e-15	0.577412	0.492	0.248	2.07813e-11	3.2	nfkbiab
hspb81	1.83741e-15	0.198057	0.201	0.052	2.74839e-11	3.2	hspb8
mxb1	1.98947e-15	0.214343	0.206	0.054	2.97585e-11	3.2	mxb
si:busm1-194e12.112	2.08648e-15	0.400789	0.613	0.38	3.12095e-11	3.2	si:busm1-194e12.11
ecrg4a1	2.5835e-15	0.366917	0.467	0.224	3.86439e-11	3.2	ecrg4a
soga1	3.06805e-15	0.172496	0.186	0.046	4.58918e-11	3.2	soga1
si:ch211-114c12.2	3.32247e-15	0.360012	0.302	0.111	4.96975e-11	3.2	si:ch211-114c12.2
CABZ01044746.1	3.47367e-15	0.240157	0.191	0.049	5.19592e-11	3.2	CABZ01044746.1
txn1	3.6363e-15	0.22815	0.226	0.065	5.43918e-11	3.2	txn
LO018188.1	4.88853e-15	0.115	0.121	0.019	7.31227e-11	3.2	LO018188.1
stard9	2.33346e-14	0.133599	0.106	0.016	3.49039e-10	3.2	stard9
ugt5g1	4.06228e-14	0.158364	0.136	0.027	6.07636e-10	3.2	ugt5g1
cahz1	1.08936e-13	0.17123	0.437	0.181	1.62947e-09	3.2	cahz
her9	1.57436e-13	0.573425	0.628	0.4	2.35493e-09	3.2	her9
pcdh19	2.80568e-13	0.107415	0.111	0.019	4.19674e-09	3.2	pcdh19
calm3a1	3.73192e-13	0.456509	0.593	0.398	5.5822e-09	3.2	calm3a
h2afx1	3.96236e-13	0.555399	0.769	0.57	5.9269e-09	3.2	h2afx1
nhsl1a	3.99778e-13	0.261025	0.302	0.121	5.97988e-09	3.2	nhsl1a
znf7031	5.28579e-13	0.173555	0.211	0.065	7.90649e-09	3.2	znf703
fosab2	6.63617e-13	0.356466	0.995	0.947	9.92639e-09	3.2	fosab
lhx91	1.26599e-12	0.160711	0.387	0.159	1.89367e-08	3.2	lhx9
yap11	1.26723e-12	0.303401	0.457	0.251	1.89553e-08	3.2	yap1
kcng4a	1.5854e-12	0.151897	0.196	0.058	2.37145e-08	3.2	kcng4a
pnrc23	1.68073e-12	0.44842	0.945	0.829	2.51404e-08	3.2	pnrc2
grb10a1	1.95877e-12	0.291564	0.387	0.185	2.92993e-08	3.2	grb10a
CABZ01049847.11	2.00069e-12	0.155864	0.196	0.059	2.99263e-08	3.2	CABZ01049847.1
napsa	2.02608e-12	0.213159	0.251	0.09	3.03061e-08	3.2	napsa
tubb4b2	3.22802e-12	0.413019	0.814	0.593	4.82847e-08	3.2	tubb4b
lrch41	4.64958e-12	0.120662	0.181	0.051	6.95484e-08	3.2	lrch4
aste1a1	5.27656e-12	0.506872	0.497	0.3	7.89268e-08	3.2	aste1a
si:ch211-137i24.102	5.30029e-12	0.386025	0.588	0.355	7.92817e-08	3.2	si:ch211-137i24.10
arpc1b1	5.69449e-12	0.165592	0.141	0.034	8.51782e-08	3.2	arpc1b
etv5b	5.79093e-12	0.135511	0.151	0.038	8.66207e-08	3.2	etv5b
cd74b2	5.82084e-12	0.274278	1	0.937	8.70681e-08	3.2	cd74b
txnipa1	6.33341e-12	0.459913	0.387	0.191	9.47351e-08	3.2	txnipa
cavin2a	6.85369e-12	0.224799	0.347	0.158	1.02517e-07	3.2	cavin2a
cdh21	7.34397e-12	0.204873	0.362	0.163	1.09851e-07	3.2	cdh2
tapbp.1	7.58987e-12	0.462576	0.452	0.251	1.13529e-07	3.2	tapbp.1
LO017815.1	7.76693e-12	0.100531	0.106	0.019	1.16178e-07	3.2	LO017815.1
zgc:92481	8.15141e-12	0.278718	0.337	0.154	1.21929e-07	3.2	zgc:92481
egr12	8.76784e-12	0.462787	0.849	0.647	1.31149e-07	3.2	egr1
fgd5a	9.22279e-12	0.162303	0.216	0.072	1.37955e-07	3.2	fgd5a
amd1	1.31348e-11	0.265041	0.216	0.074	1.9647e-07	3.2	amd1
ier52	1.56141e-11	0.423373	0.789	0.559	2.33556e-07	3.2	ier5
fras11	1.61954e-11	0.154313	0.181	0.054	2.4225e-07	3.2	fras1
actb12	1.66798e-11	0.355938	0.985	0.865	2.49497e-07	3.2	actb1
alkbh3.11	2.42795e-11	0.224602	0.186	0.058	3.63172e-07	3.2	alkbh3.1
metrnla	2.67604e-11	0.288361	0.312	0.144	4.00283e-07	3.2	metrnla
arhgef1b1	2.8292e-11	0.357122	0.447	0.252	4.23191e-07	3.2	arhgef1b
ly75	3.04391e-11	0.171133	0.226	0.081	4.55308e-07	3.2	ly75
tgif11	3.14105e-11	0.351543	0.417	0.218	4.69839e-07	3.2	tgif1
glud1a1	3.47141e-11	0.315104	0.322	0.148	5.19253e-07	3.2	glud1a
smad5	3.95966e-11	0.217599	0.156	0.044	5.92286e-07	3.2	smad5
apol1	4.20149e-11	0.185358	0.216	0.077	6.28459e-07	3.2	apol1
magi2a	4.83621e-11	0.11632	0.111	0.023	7.234e-07	3.2	magi2a
fez1	6.4983e-11	0.208588	0.221	0.081	9.72015e-07	3.2	fez1
anxa3b1	8.30843e-11	0.28588	0.327	0.149	1.24277e-06	3.2	anxa3b
tenm31	9.05206e-11	0.198214	0.241	0.093	1.35401e-06	3.2	tenm3
igfbp5b1	1.18053e-10	0.370125	0.352	0.178	1.76584e-06	3.2	igfbp5b
afap1l1a1	1.44893e-10	0.174693	0.261	0.103	2.16731e-06	3.2	afap1l1a
mdm4	1.53543e-10	0.241433	0.241	0.094	2.2967e-06	3.2	mdm4
adamtsl5	1.64164e-10	0.142614	0.176	0.056	2.45556e-06	3.2	adamtsl5
hsd3b71	1.64772e-10	0.308095	0.251	0.1	2.46466e-06	3.2	hsd3b7
mao1	1.81336e-10	0.122303	0.161	0.048	2.71242e-06	3.2	mao
gnai1	2.00139e-10	0.228539	0.387	0.203	2.99367e-06	3.2	gnai1
id11	2.01135e-10	0.576742	0.734	0.504	3.00857e-06	3.2	id1
rab11fip4b1	2.10337e-10	0.19665	0.291	0.127	3.14623e-06	3.2	rab11fip4b
rnf130	2.48883e-10	0.240776	0.261	0.113	3.72279e-06	3.2	rnf130
phlda1	3.65051e-10	0.190085	0.241	0.095	5.46044e-06	3.2	phlda1
zgc:1627302	4.09834e-10	0.402493	0.754	0.483	6.13029e-06	3.2	zgc:162730
id2b1	4.6589e-10	0.623702	0.327	0.166	6.96879e-06	3.2	id2b
abhd15a	4.73404e-10	0.20094	0.261	0.111	7.08117e-06	3.2	abhd15a
tob1a	7.5038e-10	0.389958	0.452	0.273	1.12242e-05	3.2	tob1a
ache	8.66648e-10	0.12518	0.131	0.035	1.29633e-05	3.2	ache
klf6a2	9.05157e-10	0.440598	0.96	0.817	1.35393e-05	3.2	klf6a
myl61	9.62836e-10	0.221865	0.201	0.074	1.44021e-05	3.2	myl6
rgs5b	1.05359e-09	0.25928	0.146	0.043	1.57595e-05	3.2	rgs5b
fmnl31	1.05361e-09	0.180616	0.266	0.115	1.57598e-05	3.2	fmnl3
klf12a	1.22926e-09	0.177813	0.236	0.096	1.83873e-05	3.2	klf12a
arhgdig1	1.31264e-09	0.204309	0.226	0.089	1.96345e-05	3.2	arhgdig
klf11b1	1.46189e-09	0.324044	0.417	0.231	2.18669e-05	3.2	klf11b
ca8	1.53435e-09	0.137333	0.181	0.063	2.29509e-05	3.2	ca8
znfx11	1.53694e-09	0.140293	0.156	0.049	2.29895e-05	3.2	znfx1
btg22	2.25805e-09	0.31699	0.99	0.917	3.37759e-05	3.2	btg2
btbd6b	2.78871e-09	0.227422	0.276	0.128	4.17136e-05	3.2	btbd6b
tcima1	2.80387e-09	0.208559	0.171	0.056	4.19403e-05	3.2	tcima
pim12	3.27209e-09	0.388326	0.839	0.619	4.89439e-05	3.2	pim1
ch25h1	3.43033e-09	0.303646	0.216	0.084	5.13108e-05	3.2	ch25h
tcf12	3.59258e-09	0.301491	0.402	0.229	5.37378e-05	3.2	tcf12
nme31	3.90587e-09	0.17776	0.206	0.078	5.8424e-05	3.2	nme3
st14a1	3.99344e-09	0.17082	0.181	0.065	5.97338e-05	3.2	st14a
ppp1r3cb	4.00096e-09	0.118322	0.116	0.03	5.98464e-05	3.2	ppp1r3cb
si:ch211-195b15.81	4.44934e-09	0.288109	0.191	0.071	6.65533e-05	3.2	si:ch211-195b15.8
si:ch211-225b11.1	4.59796e-09	0.259697	0.312	0.159	6.87762e-05	3.2	si:ch211-225b11.1
CU468917.11	4.6712e-09	0.1682	0.226	0.089	6.98718e-05	3.2	CU468917.1
ifi302	5.19485e-09	0.290124	0.925	0.705	7.77046e-05	3.2	ifi30
si:dkey-222f8.3	5.27029e-09	0.222651	0.307	0.146	7.8833e-05	3.2	si:dkey-222f8.3
zmp:0000000912	6.14921e-09	0.162111	0.211	0.084	9.19798e-05	3.2	zmp:0000000912
camta1b	6.41736e-09	0.117199	0.126	0.036	9.59908e-05	3.2	camta1b
rgs12a	8.34131e-09	0.181721	0.302	0.146	0.000124769	3.2	rgs12a
ss18l2	8.92189e-09	0.114985	0.126	0.036	0.000133454	3.2	ss18l2
dspa	9.2793e-09	0.247839	0.402	0.239	0.0001388	3.2	dspa
col14a1a1	1.00604e-08	0.114585	0.136	0.041	0.000150484	3.2	col14a1a
hsbp1a1	1.1331e-08	0.207091	0.397	0.213	0.000169489	3.2	hsbp1a
anxa5b1	1.16293e-08	0.231777	0.236	0.103	0.000173951	3.2	anxa5b
cntfr	1.34678e-08	0.218548	0.256	0.118	0.000201451	3.2	cntfr
smad3a1	1.42141e-08	0.152197	0.251	0.112	0.000212614	3.2	smad3a
wu:fj29h111	1.51545e-08	0.252189	0.342	0.182	0.000226681	3.2	wu:fj29h11
esr2a1	1.65082e-08	0.219281	0.317	0.163	0.000246929	3.2	esr2a
nfkb21	1.7721e-08	0.166571	0.221	0.094	0.00026507	3.2	nfkb2
hmgb3a	1.77277e-08	0.233229	0.407	0.238	0.000265171	3.2	hmgb3a
agrn2	2.0403e-08	0.238843	0.884	0.784	0.000305188	3.2	agrn
tp53	2.04228e-08	0.201473	0.266	0.124	0.000305485	3.2	tp53
si:ch211-199g17.21	2.07894e-08	0.34282	0.482	0.32	0.000310968	3.2	si:ch211-199g17.2
si:busm1-266f07.22	2.08115e-08	0.481983	0.608	0.432	0.000311299	3.2	si:busm1-266f07.2
b2m1	2.42918e-08	0.245096	1	0.988	0.000363357	3.2	b2m
alcama2	2.60207e-08	0.198543	1	0.981	0.000389218	3.2	alcama
kctd12.21	2.75306e-08	0.258497	0.382	0.207	0.000411803	3.2	kctd12.2
nfybb	2.79435e-08	0.183418	0.261	0.123	0.000417979	3.2	nfybb
sh3gl3b1	3.29797e-08	0.277428	0.312	0.163	0.00049331	3.2	sh3gl3b
mpzl2b	3.36473e-08	0.322385	0.497	0.321	0.000503297	3.2	mpzl2b
litaf1	3.37439e-08	0.184584	0.246	0.109	0.000504741	3.2	litaf
abracl	3.42479e-08	0.145466	0.141	0.046	0.00051228	3.2	abracl
hsp90aa1.23	3.73495e-08	0.39977	0.824	0.618	0.000558674	3.2	hsp90aa1.2
tuba1b	3.77885e-08	0.170246	0.126	0.038	0.00056524	3.2	tuba1b
ahcyl21	3.90196e-08	0.195332	0.327	0.171	0.000583655	3.2	ahcyl2
gata6	3.91162e-08	0.303243	0.477	0.311	0.000585101	3.2	gata6
cav11	4.80766e-08	0.224897	0.492	0.302	0.000719129	3.2	cav1
steap4	4.88625e-08	0.169807	0.211	0.089	0.000730885	3.2	steap4
tubb2b	7.19729e-08	0.288731	0.171	0.066	0.00107657	3.2	tubb2b
fam204a	7.4448e-08	0.206047	0.327	0.177	0.00111359	3.2	fam204a
si:ch1073-266p11.2	7.64407e-08	0.113378	0.106	0.029	0.0011434	3.2	si:ch1073-266p11.2
map3k14a	8.49527e-08	0.126371	0.201	0.084	0.00127072	3.2	map3k14a
tnfsf10	9.14244e-08	0.194302	0.236	0.111	0.00136753	3.2	tnfsf10
ywhah1	9.23803e-08	0.20902	0.236	0.109	0.00138182	3.2	ywhah
prkar2aa	1.03057e-07	0.22701	0.246	0.114	0.00154153	3.2	prkar2aa
arhgef18a	1.3909e-07	0.247289	0.452	0.285	0.0020805	3.2	arhgef18a
cbr1l1	1.47399e-07	0.140273	0.136	0.046	0.0022048	3.2	cbr1l
notum1b1	1.58704e-07	0.125071	0.09	0.023	0.0023739	3.2	notum1b
slc7a6	1.81011e-07	0.197942	0.251	0.125	0.00270757	3.2	slc7a6
si:ch211-281l24.3	1.99824e-07	0.238851	0.412	0.246	0.00298897	3.2	si:ch211-281l24.3
nrip1b	2.01515e-07	0.121014	0.186	0.076	0.00301426	3.2	nrip1b
rnf213a1	2.10812e-07	0.333111	0.553	0.4	0.00315333	3.2	rnf213a
nktr	2.22026e-07	0.205724	0.312	0.169	0.00332107	3.2	nktr
wls1	2.25606e-07	0.251887	0.251	0.124	0.00337461	3.2	wls
col4a21	2.58996e-07	0.108377	0.181	0.073	0.00387407	3.2	col4a2
grhl11	3.19851e-07	0.118304	0.146	0.053	0.00478432	3.2	grhl1
osbpl10b	3.35016e-07	0.160883	0.206	0.093	0.00501118	3.2	osbpl10b
pcna1	4.02043e-07	0.279418	0.101	0.029	0.00601376	3.2	pcna
axin1	4.07544e-07	0.161474	0.261	0.131	0.00609604	3.2	axin1
chchd3a	4.10234e-07	0.112541	0.171	0.069	0.00613629	3.2	chchd3a
fblim11	4.51422e-07	0.161926	0.271	0.139	0.00675237	3.2	fblim1
ralab1	4.52797e-07	0.228579	0.392	0.251	0.00677294	3.2	ralab
ciita	4.62881e-07	0.126084	0.221	0.101	0.00692377	3.2	ciita
cemip2	5.06169e-07	0.234318	0.387	0.236	0.00757127	3.2	cemip2
ppiaa1	5.15466e-07	0.233939	0.799	0.647	0.00771033	3.2	ppiaa
large2	5.53154e-07	0.161563	0.261	0.134	0.00827408	3.2	large2
CABZ01073795.11	5.928e-07	0.422655	0.302	0.164	0.00886711	3.2	CABZ01073795.1
mhc2b2	7.03307e-07	0.336023	0.548	0.391	0.0105201	3.2	mhc2b
2020-06-02	7.24931e-07	0.250028	1	0.941	0.0108435	3.2	jun
abca2	7.87649e-07	0.117299	0.166	0.068	0.0117817	3.2	abca2
ece1	9.32395e-07	0.137919	0.226	0.109	0.0139468	3.2	ece1
si:dkey-188i13.91	1.06225e-06	0.241494	0.226	0.111	0.0158891	3.2	si:dkey-188i13.9
aqp122	1.43541e-06	0.205948	0.387	0.235	0.0214709	3.2	aqp12
dusp22	1.49891e-06	0.30665	0.593	0.409	0.0224207	3.2	dusp2
amotl2a1	1.71852e-06	0.312198	0.427	0.282	0.0257056	3.2	amotl2a
arglu1b	1.96103e-06	0.118724	0.236	0.116	0.029333	3.2	arglu1b
setbp1	2.09705e-06	0.10326	0.176	0.076	0.0313677	3.2	setbp1
aldh9a1a.1	2.22707e-06	0.250768	0.749	0.618	0.0333125	3.2	aldh9a1a.1
jund2	2.27219e-06	0.330041	0.648	0.509	0.0339874	3.2	jund
si:ch73-233k15.2	2.32529e-06	0.139588	0.221	0.108	0.0347817	3.2	si:ch73-233k15.2
si:ch211-106e7.2	2.34381e-06	0.183306	0.151	0.061	0.0350586	3.2	si:ch211-106e7.2
phc2a	2.36665e-06	0.212299	0.176	0.078	0.0354003	3.2	phc2a
ccn2a1	2.69965e-06	0.279363	0.206	0.096	0.0403813	3.2	ccn2a
pkp21	2.77514e-06	0.101172	0.111	0.038	0.0415106	3.2	pkp2
mfge8b	2.82626e-06	0.309661	0.497	0.353	0.0422753	3.2	mfge8b
ptp4a11	3.15593e-06	0.134482	0.151	0.061	0.0472064	3.2	ptp4a1
lef11	3.5628e-06	0.122415	0.211	0.101	0.0532924	3.2	lef1
tnrc6c11	3.59377e-06	0.278712	0.412	0.273	0.0537556	3.2	tnrc6c1
srgap3	3.64578e-06	0.177265	0.251	0.136	0.0545336	3.2	srgap3
bahcc1b	3.87576e-06	0.139621	0.191	0.089	0.0579737	3.2	bahcc1b
phf23b	4.3365e-06	0.110223	0.126	0.048	0.0648653	3.2	phf23b
sdcbp21	4.77224e-06	0.288289	0.543	0.413	0.0713832	3.2	sdcbp2
lgals9l31	6.44831e-06	0.221535	0.337	0.211	0.0964538	3.2	lgals9l3
tmsb4x	6.62233e-06	0.162629	1	1	0.0990568	3.2	tmsb4x
zbtb201	7.66448e-06	0.230695	0.467	0.342	0.114645	3.2	zbtb20
sdc42	8.38068e-06	0.252849	0.819	0.622	0.125358	3.2	sdc4
fzd7b	8.47166e-06	0.143981	0.231	0.121	0.126719	3.2	fzd7b
socs3b	8.47448e-06	0.17018	0.161	0.069	0.126761	3.2	socs3b
spred2b1	9.22453e-06	0.112707	0.131	0.053	0.137981	3.2	spred2b
xaf11	9.26929e-06	0.195378	0.302	0.178	0.13865	3.2	xaf1
pkp3b	9.71865e-06	0.226472	0.357	0.226	0.145372	3.2	pkp3b
si:rp71-36a1.11	9.76122e-06	0.204133	0.407	0.271	0.146008	3.2	si:rp71-36a1.1
tspan4b	9.76668e-06	0.106998	0.106	0.038	0.14609	3.2	tspan4b
mzt2b	9.94834e-06	0.101228	0.161	0.071	0.148807	3.2	mzt2b
mki67	9.99242e-06	0.189365	0.055	0.013	0.149467	3.2	mki67
mhc2dab1	1.04462e-05	0.165744	0.362	0.229	0.156254	3.2	mhc2dab
ifi451	1.04636e-05	0.318626	0.447	0.32	0.156515	3.2	ifi45
dio1	1.06449e-05	0.140638	0.236	0.125	0.159226	3.2	dio1
epb41a	1.10989e-05	0.112171	0.166	0.076	0.166017	3.2	epb41a
zgc:123010	1.12155e-05	0.238549	0.487	0.36	0.167761	3.2	zgc:123010
si:dkey-112a7.41	1.15985e-05	0.187421	0.196	0.097	0.173491	3.2	si:dkey-112a7.4
nfkbib	1.22298e-05	0.156129	0.317	0.193	0.182933	3.2	nfkbib
si:ch211-212k18.71	1.24211e-05	0.304911	0.382	0.257	0.185794	3.2	si:ch211-212k18.7
anxa41	1.35266e-05	0.269427	0.382	0.255	0.202331	3.2	anxa4
sptan11	1.47302e-05	0.148478	0.211	0.106	0.220335	3.2	sptan1
socs3a2	1.62482e-05	0.255626	1	0.921	0.243041	3.2	socs3a
hist2h2l1	1.65497e-05	0.344369	0.402	0.265	0.24755	3.2	hist2h2l
cxcl18b1	1.68584e-05	0.233962	0.382	0.24	0.252169	3.2	cxcl18b
ptpn13	1.76021e-05	0.187988	0.372	0.248	0.263292	3.2	ptpn13
ier2a2	1.79382e-05	0.232799	0.874	0.682	0.268319	3.2	ier2a
sema4ab	1.87509e-05	0.154708	0.241	0.134	0.280476	3.2	sema4ab
pfn11	1.94551e-05	0.179967	0.256	0.143	0.291009	3.2	pfn1
eps15	2.02685e-05	0.10736	0.191	0.094	0.303176	3.2	eps15
rin2	2.07785e-05	0.103978	0.171	0.08	0.310804	3.2	rin2
kansl1b	2.14346e-05	0.191397	0.352	0.235	0.320618	3.2	kansl1b
cgnl11	2.16149e-05	0.10574	0.206	0.104	0.323315	3.2	cgnl1
h1f01	2.42388e-05	0.253092	0.774	0.609	0.362564	3.2	h1f0
tmem88b1	2.43306e-05	0.143138	0.111	0.043	0.363937	3.2	tmem88b
il151	2.58294e-05	0.145036	0.216	0.111	0.386356	3.2	il15
rassf1	2.62118e-05	0.101679	0.171	0.081	0.392076	3.2	rassf1
ece2b	2.72708e-05	0.104858	0.156	0.072	0.407916	3.2	ece2b
aplp21	2.93071e-05	0.284987	0.462	0.357	0.438376	3.2	aplp2
phactr4a1	3.01226e-05	0.185949	0.402	0.28	0.450574	3.2	phactr4a
egr41	3.06064e-05	0.404281	0.075	0.023	0.457811	3.2	egr4
adamts22	3.15401e-05	0.206193	0.447	0.325	0.471777	3.2	adamts2
zgc:55461	3.3628e-05	0.138507	0.07	0.021	0.503007	3.2	zgc:55461
cd99l2	3.72948e-05	0.185128	0.372	0.25	0.557855	3.2	cd99l2
gpx1a1	3.92909e-05	0.121352	0.146	0.065	0.587713	3.2	gpx1a
marcksb	3.95142e-05	0.160325	0.07	0.021	0.591053	3.2	marcksb
chmp2a	4.06585e-05	0.147985	0.206	0.108	0.60817	3.2	chmp2a
cited4b	4.28467e-05	0.106534	0.08	0.026	0.640901	3.2	cited4b
magi1b1	4.3274e-05	0.174801	0.281	0.169	0.647292	3.2	magi1b
n4bp11	4.43289e-05	0.143537	0.186	0.095	0.663072	3.2	n4bp1
pim3	4.54074e-05	0.151771	0.176	0.086	0.679204	3.2	pim3
slc25a36a	4.55478e-05	0.110773	0.181	0.091	0.681304	3.2	slc25a36a
mtpn	4.68379e-05	0.183494	0.246	0.142	0.700601	3.2	mtpn
efnb2a	4.84064e-05	0.10326	0.161	0.077	0.724063	3.2	efnb2a
mvp	4.90352e-05	0.154499	0.261	0.154	0.733468	3.2	mvp
chd6	4.93136e-05	0.146789	0.281	0.171	0.737632	3.2	chd6
hmgb2a	5.39206e-05	0.464825	0.372	0.255	0.806545	3.2	hmgb2a
plcb3	5.65404e-05	0.115878	0.206	0.111	0.845731	3.2	plcb3
ubc2	5.77766e-05	0.216225	0.844	0.695	0.864223	3.2	ubc
ppp1r101	5.84076e-05	0.165837	0.231	0.133	0.873661	3.2	ppp1r10
csrp1a1	6.11957e-05	0.136853	0.196	0.1	0.915365	3.2	csrp1a
h2afvb1	6.531e-05	0.378877	0.302	0.198	0.976907	3.2	h2afvb
elovl1b1	6.59599e-05	0.173272	0.231	0.128	0.986629	3.2	elovl1b
fbxl7	6.71151e-05	0.139543	0.236	0.136	1	3.2	fbxl7
sesn3	6.81738e-05	0.114852	0.211	0.115	1	3.2	sesn3
ets21	7.02501e-05	0.107514	0.106	0.042	1	3.2	ets2
axin21	7.13079e-05	0.170514	0.312	0.199	1	3.2	axin2
map7d1b	7.49624e-05	0.158317	0.296	0.186	1	3.2	map7d1b
dclk1a1	8.97786e-05	0.179518	0.231	0.131	1	3.2	dclk1a
si:ch211-15b10.61	9.00257e-05	0.199762	0.362	0.242	1	3.2	si:ch211-15b10.6
leng8	9.01039e-05	0.109169	0.126	0.055	1	3.2	leng8
enc11	9.71095e-05	0.248027	0.568	0.447	1	3.2	enc1
dnajb1b2	9.91308e-05	0.240461	0.824	0.657	1	3.2	dnajb1b
ppp3ccb	0.000100569	0.116606	0.216	0.122	1	3.2	ppp3ccb
anxa2a2	0.000100723	0.290582	0.593	0.46	1	3.2	anxa2a
si:ch211-271b14.1	0.000102918	0.165203	0.201	0.111	1	3.2	si:ch211-271b14.1
mad2l1	0.000106721	0.108541	0.06	0.018	1	3.2	mad2l1
cxxc5a1	0.000107168	0.169842	0.291	0.183	1	3.2	cxxc5a
tjp2b2	0.0001088	0.190923	0.286	0.179	1	3.2	tjp2b
cux1a1	0.000111967	0.171255	0.342	0.233	1	3.2	cux1a
ccn12	0.000114534	0.348342	0.387	0.265	1	3.2	ccn1
tax1bp31	0.000130624	0.102556	0.196	0.103	1	3.2	tax1bp3
FO744833.2	0.000130912	0.169187	0.312	0.201	1	3.2	FO744833.2
acss1	0.000136118	0.116352	0.191	0.103	1	3.2	acss1
arpc5a	0.000158243	0.126948	0.226	0.133	1	3.2	arpc5a
tbcb	0.000163087	0.15639	0.256	0.155	1	3.2	tbcb
ftr821	0.00017223	0.12883	0.216	0.121	1	3.2	ftr82
lsr	0.000175185	0.148518	0.206	0.116	1	3.2	lsr
zgc:77849	0.000176109	0.193834	0.322	0.206	1	3.2	zgc:77849
hist1h4l.10	0.000179534	0.168275	0.327	0.219	1	3.2	hist1h4l.10
uchl11	0.000186003	0.201259	0.106	0.045	1	3.2	uchl1
grna2	0.000216185	0.137483	0.417	0.299	1	3.2	grna
cdc20	0.000216505	0.136104	0.055	0.016	1	3.2	cdc20
sh3bgrl31	0.000219672	0.156288	0.151	0.076	1	3.2	sh3bgrl3
myo1ca1	0.000223511	0.141171	0.226	0.135	1	3.2	myo1ca
ube2c	0.000224624	0.206912	0.07	0.024	1	3.2	ube2c
shroom4	0.000234172	0.139556	0.216	0.127	1	3.2	shroom4
med19a1	0.000245638	0.109634	0.131	0.061	1	3.2	med19a
sart1	0.000280752	0.100457	0.151	0.075	1	3.2	sart1
gig2o	0.000286167	0.130909	0.216	0.126	1	3.2	gig2o
capn2b1	0.000299225	0.121121	0.196	0.112	1	3.2	capn2b
esr2b1	0.000303483	0.101733	0.216	0.126	1	3.2	esr2b
pbx1a	0.000305538	0.102552	0.206	0.118	1	3.2	pbx1a
efhd1	0.000328364	0.141381	0.106	0.046	1	3.2	efhd1
hexb	0.000339154	0.149681	0.256	0.161	1	3.2	hexb
tiparp	0.000356138	0.165344	0.296	0.199	1	3.2	tiparp
stxbp5a	0.000365619	0.118704	0.146	0.074	1	3.2	stxbp5a
cyfip1	0.000367844	0.152988	0.231	0.141	1	3.2	cyfip1
cd276	0.000383364	0.105837	0.156	0.082	1	3.2	cd276
mgst3b1	0.000393345	0.190649	0.613	0.505	1	3.2	mgst3b
ERC1	0.000396527	0.106075	0.116	0.054	1	3.2	ERC1
aclya	0.000414433	0.108101	0.101	0.044	1	3.2	aclya
pepd	0.000442705	0.112789	0.151	0.078	1	3.2	pepd
CABZ01086029.1	0.000453242	0.142488	0.291	0.191	1	3.2	CABZ01086029.1
f11r.11	0.000466235	0.186088	0.281	0.179	1	3.2	f11r.1
gpc1b	0.000471468	0.122108	0.171	0.094	1	3.2	gpc1b
cfap298	0.000480602	0.101572	0.201	0.118	1	3.2	cfap298
fam129bb	0.000492072	0.108615	0.161	0.086	1	3.2	fam129bb
sri1	0.000501029	0.161137	0.256	0.164	1	3.2	sri
zfp36l1b1	0.000504878	0.268539	0.513	0.417	1	3.2	zfp36l1b
si:ch211-219a4.3	0.000505025	0.13371	0.241	0.151	1	3.2	si:ch211-219a4.3
btr09	0.000549326	0.139962	0.281	0.184	1	3.2	btr09
gnaia	0.000565848	0.104659	0.166	0.09	1	3.2	gnaia
scaf1	0.000582032	0.111205	0.141	0.072	1	3.2	scaf1
pbxip1b1	0.000587798	0.129298	0.196	0.114	1	3.2	pbxip1b
serpinh1b1	0.000588421	0.197979	0.226	0.135	1	3.2	serpinh1b
si:ch73-380l3.41	0.000602036	0.125867	0.251	0.158	1	3.2	si:ch73-380l3.4
bhlhe401	0.000623937	0.312511	0.709	0.595	1	3.2	bhlhe40
col4a3bpa1	0.000625683	0.111846	0.256	0.164	1	3.2	col4a3bpa
mcl1a2	0.000627835	0.160038	0.915	0.757	1	3.2	mcl1a
sfxn5b	0.000629517	0.10326	0.141	0.073	1	3.2	sfxn5b
dsc2l	0.000649989	0.150126	0.482	0.39	1	3.2	dsc2l
atf4b1	0.000661051	0.170561	0.854	0.749	1	3.2	atf4b
pmp22b	0.000668435	0.270726	0.442	0.332	1	3.2	pmp22b
gstp1	0.0006843	0.229455	0.302	0.208	1	3.2	gstp1
cdkn1bb	0.000685138	0.166461	0.307	0.209	1	3.2	cdkn1bb
limk2	0.000706099	0.127413	0.211	0.13	1	3.2	limk2
etnk11	0.000713052	0.176261	0.392	0.288	1	3.2	etnk1
cd151l1	0.00073208	0.129789	0.116	0.056	1	3.2	cd151l
ip6k2a	0.000739803	0.154079	0.322	0.226	1	3.2	ip6k2a
atp2b41	0.000780828	0.169519	0.402	0.291	1	3.2	atp2b4
stat2	0.000781986	0.156875	0.417	0.314	1	3.2	stat2
lama4	0.000809465	0.107454	0.206	0.123	1	3.2	lama4
ppfibp1a1	0.000855216	0.203198	0.352	0.259	1	3.2	ppfibp1a
si:dkey-256h2.1	0.000888737	0.110931	0.08	0.033	1	3.2	si:dkey-256h2.1
si:ch211-232b12.5	0.000895301	0.107846	0.186	0.109	1	3.2	si:ch211-232b12.5
ctbp2a	0.000900863	0.105441	0.191	0.112	1	3.2	ctbp2a
si:ch211-214p13.9	0.000911558	0.103393	0.166	0.094	1	3.2	si:ch211-214p13.9
irf9	0.000919944	0.105329	0.281	0.184	1	3.2	irf9
lgals17	0.000922846	0.114894	0.246	0.153	1	3.2	lgals17
slc29a1a1	0.000924121	0.183039	0.286	0.191	1	3.2	slc29a1a
lipf	0.000930449	0.105184	0.201	0.121	1	3.2	lipf
flii	0.000932021	0.103978	0.151	0.082	1	3.2	flii
pbx41	0.000939642	0.177743	0.286	0.195	1	3.2	pbx4
vasnb	0.000945909	0.135336	0.578	0.462	1	3.2	vasnb
hmgb2b	0.000966273	0.389041	0.362	0.284	1	3.2	hmgb2b
si:ch211-210c8.6	0.000970724	0.106606	0.226	0.141	1	3.2	si:ch211-210c8.6
tnfsf12	0.00103026	0.11386	0.221	0.138	1	3.2	tnfsf12
sltm	0.00104909	0.12952	0.226	0.144	1	3.2	sltm
htatip2	0.00105866	0.113678	0.211	0.129	1	3.2	htatip2
f3b1	0.00109321	0.225559	0.734	0.586	1	3.2	f3b
u2surp	0.00111421	0.142302	0.276	0.187	1	3.2	u2surp
zc3h18	0.00113072	0.109519	0.151	0.083	1	3.2	zc3h18
atp6ap2	0.00114437	0.103327	0.231	0.139	1	3.2	atp6ap2
arpc1a	0.00115944	0.101449	0.156	0.085	1	3.2	arpc1a
nt5c2b	0.00120006	0.140045	0.241	0.156	1	3.2	nt5c2b
aspm	0.00124666	0.133047	0.065	0.025	1	3.2	aspm
rsad21	0.00128895	0.34341	0.181	0.106	1	3.2	rsad2
adh8b1	0.00129489	0.108849	0.156	0.088	1	3.2	adh8b
dzip1	0.00136751	0.113835	0.191	0.116	1	3.2	dzip1
psme2	0.00137914	0.170539	0.337	0.24	1	3.2	psme2
psmb3	0.00147507	0.138403	0.251	0.161	1	3.2	psmb3
prss16	0.00151957	0.100817	0.211	0.129	1	3.2	prss16
plcg1	0.00161019	0.11187	0.176	0.104	1	3.2	plcg1
CU984600.21	0.00166606	0.11547	0.181	0.107	1	3.2	CU984600.2
mycbp1	0.00214996	0.10996	0.176	0.103	1	3.2	mycbp
socs1a	0.00215903	0.148478	0.161	0.093	1	3.2	socs1a
ube2d1a	0.00225337	0.102542	0.156	0.091	1	3.2	ube2d1a
pdlim22	0.00229822	0.119794	0.261	0.175	1	3.2	pdlim2
si:dkey-188i13.101	0.00239976	0.18485	0.432	0.336	1	3.2	si:dkey-188i13.10
mcl1b1	0.00252919	0.215522	0.407	0.324	1	3.2	mcl1b
zgc:175088	0.00257779	0.169345	0.261	0.181	1	3.2	zgc:175088
jpt1b1	0.00281081	0.217858	0.266	0.186	1	3.2	jpt1b
smoc22	0.00282022	0.184994	0.764	0.685	1	3.2	smoc2
phrf1	0.00282582	0.100387	0.206	0.132	1	3.2	phrf1
zgc:923131	0.00282791	0.137376	0.151	0.088	1	3.2	zgc:92313
cd631	0.0028999	0.246326	0.508	0.442	1	3.2	cd63
ubb2	0.00305087	0.212378	0.794	0.644	1	3.2	ubb
pdlim11	0.00321334	0.140869	0.226	0.151	1	3.2	pdlim1
myl9b2	0.0037358	0.165367	0.427	0.332	1	3.2	myl9b
ptmab1	0.00376136	0.18996	0.598	0.48	1	3.2	ptmab
tent5ba2	0.00378848	0.135434	0.427	0.335	1	3.2	tent5ba
srsf11	0.00380238	0.113534	0.201	0.128	1	3.2	srsf11
anxa11a1	0.00404926	0.106363	0.156	0.092	1	3.2	anxa11a
lcorl	0.00415769	0.118943	0.211	0.14	1	3.2	lcorl
si:ch211-197h24.9	0.0041883	0.143006	0.372	0.285	1	3.2	si:ch211-197h24.9
slka1	0.00432888	0.126677	0.261	0.187	1	3.2	slka
zgc:1538671	0.00434265	0.161445	0.704	0.579	1	3.2	zgc:153867
zgc:1951731	0.00435722	0.162688	0.352	0.287	1	3.2	zgc:195173
iscub	0.00443772	0.140926	0.317	0.227	1	3.2	iscub
npm2b	0.00446519	0.135019	0.055	0.022	1	3.2	npm2b
prkd21	0.00473073	0.114207	0.196	0.13	1	3.2	prkd2
crebzf	0.00477093	0.100935	0.226	0.148	1	3.2	crebzf
h1fx1	0.00481793	0.244224	0.492	0.38	1	3.2	h1fx
jupa	0.00489762	0.100295	0.276	0.198	1	3.2	jupa
rab5c	0.0050903	0.13367	0.256	0.176	1	3.2	rab5c
hmgb1a1	0.00509079	0.170556	0.422	0.331	1	3.2	hmgb1a
mhc1zba1	0.00552927	0.139313	0.869	0.788	1	3.2	mhc1zba
ep300b	0.00565207	0.102262	0.161	0.1	1	3.2	ep300b
stat1a	0.00598156	0.152412	0.709	0.605	1	3.2	stat1a
spry21	0.00643341	0.149767	0.377	0.285	1	3.2	spry2
vps281	0.00681882	0.103112	0.121	0.069	1	3.2	vps28
il15ra1	0.00689961	0.143146	0.226	0.158	1	3.2	il15ra
xbp11	0.00696965	0.141781	0.523	0.403	1	3.2	xbp1
cmbl	0.00735635	0.100178	0.171	0.107	1	3.2	cmbl
higd1a1	0.0073859	0.15494	0.467	0.388	1	3.2	higd1a
prdx2	0.00740594	0.201135	0.508	0.432	1	3.2	prdx2
psip1b	0.00771261	0.108287	0.216	0.146	1	3.2	psip1b
si:dkey-204f11.64	0.00777939	0.111292	0.251	0.179	1	3.2	si:dkey-204f11.64
plekha1a	0.00778049	0.11271	0.231	0.164	1	3.2	plekha1a
rbms2a	0.00782703	0.113201	0.271	0.199	1	3.2	rbms2a
atf7ip	0.00795276	0.113445	0.191	0.125	1	3.2	atf7ip
s100v21	0.00823248	0.112968	0.663	0.563	1	3.2	s100v2
schip1	0.00827984	0.161219	0.553	0.499	1	3.2	schip1
psmf1	0.00852075	0.14052	0.221	0.158	1	3.2	psmf1
DDX17	0.00868102	0.1005	0.261	0.184	1	3.2	DDX17
cirbpb1	0.0087121	0.120529	0.759	0.654	1	3.2	cirbpb
slc43a2b1	0.00883385	0.111943	0.206	0.142	1	3.2	slc43a2b
myl12.11	0.00914856	0.121231	0.814	0.739	1	3.2	myl12.1
gstr1	0.00918924	0.16836	0.412	0.339	1	3.2	gstr

## Sheet: SC1 (red)
	p_val	avg_logFC	pct.1	pct.2	p_val_adj	cluster	gene
slc25a5	3.1345e-51	0.347849	1	0.997	4.68858e-47	1_red	slc25a5
fbln5	5.76599e-50	0.615193	0.462	0.117	8.62476e-46	1_red	fbln5
appa	1.83084e-48	0.484396	0.972	0.776	2.73856e-44	1_red	appa
glulb	6.51323e-47	0.511282	1	0.852	9.74249e-43	1_red	glulb
uck2a	1.78862e-45	0.559379	0.758	0.356	2.67542e-41	1_red	uck2a
pnp4a	4.63723e-45	0.658189	0.921	0.593	6.93637e-41	1_red	pnp4a
ecm1b	8.72447e-40	0.465207	0.997	0.832	1.30501e-35	1_red	ecm1b
colec11	1.5283e-39	0.509653	0.679	0.292	2.28603e-35	1_red	colec11
inhbaa	4.75463e-36	0.520264	0.707	0.333	7.11198e-32	1_red	inhbaa
notch3	1.35608e-30	0.372242	1	0.794	2.02842e-26	1_red	notch3
atp5mc3b	2.84044e-30	0.346683	0.961	0.87	4.24874e-26	1_red	atp5mc3b
foxo1a	1.74067e-29	0.369804	0.442	0.161	2.6037e-25	1_red	foxo1a
dap1b	1.85205e-29	0.387563	0.997	0.869	2.7703e-25	1_red	dap1b
COLEC10	3.22994e-29	0.425374	0.625	0.306	4.83135e-25	1_red	COLEC10
arrdc3a	4.88519e-29	0.448458	0.707	0.373	7.30727e-25	1_red	arrdc3a
rgcc	2.1663e-27	0.505335	0.38	0.133	3.24035e-23	1_red	rgcc
hpgd	5.8531e-27	0.377777	0.335	0.107	8.75507e-23	1_red	hpgd
gmds	2.28265e-26	0.429525	0.161	0.024	3.41439e-22	1_red	gmds
mt-cyb	2.49914e-26	0.19308	0.997	0.996	3.73821e-22	1_red	mt-cyb
eya2	1.55713e-25	0.254933	0.487	0.206	2.32915e-21	1_red	eya2
hsd17b1	3.53331e-25	0.361114	0.91	0.653	5.28513e-21	1_red	hsd17b1
rbp5	5.43211e-24	0.381282	0.485	0.218	8.12535e-20	1_red	rbp5
nrxn2b	6.44709e-24	0.191316	0.293	0.091	9.64356e-20	1_red	nrxn2b
rasd1	4.19907e-23	0.430961	0.279	0.085	6.28097e-19	1_red	rasd1
ptprfb	4.7645e-23	0.346309	0.752	0.437	7.12674e-19	1_red	ptprfb
atp5fa1	1.39511e-22	0.367275	0.842	0.599	2.0868e-18	1_red	atp5fa1
cmasa	1.68659e-22	0.334469	0.29	0.096	2.5228e-18	1_red	cmasa
slc7a3a	6.66151e-22	0.36702	0.642	0.356	9.96429e-18	1_red	slc7a3a
mt-co2	7.8552e-22	0.134746	1	0.999	1.17498e-17	1_red	mt-co2
foxp4	2.07517e-21	0.347675	0.597	0.337	3.10405e-17	1_red	foxp4
hprt1	2.29834e-21	0.290023	0.541	0.252	3.43785e-17	1_red	hprt1
cldn11a	2.46049e-21	0.30108	0.994	0.956	3.68041e-17	1_red	cldn11a
atp5f1b	2.54747e-21	0.360876	0.817	0.597	3.81051e-17	1_red	atp5f1b
nrarpa	2.56839e-21	0.326138	0.839	0.585	3.8418e-17	1_red	nrarpa
mt-atp6	3.31822e-21	0.237559	1	0.976	4.9634e-17	1_red	mt-atp6
timp2a	6.17392e-21	0.386946	0.437	0.209	9.23495e-17	1_red	timp2a
nupr1b	1.28714e-20	0.66163	0.583	0.355	1.9253e-16	1_red	nupr1b
angptl4	1.71347e-20	0.436957	0.637	0.386	2.56301e-16	1_red	angptl4
dag1	1.94539e-20	0.288251	0.893	0.73	2.90991e-16	1_red	dag1
sort1a	1.07845e-19	0.269211	0.501	0.26	1.61314e-15	1_red	sort1a
sdk1a	1.19062e-19	0.20754	0.327	0.128	1.78093e-15	1_red	sdk1a
si:ch73-217n20.1	2.22537e-19	0.232351	0.417	0.189	3.32871e-15	1_red	si:ch73-217n20.1
cad	1.72709e-18	0.301455	0.823	0.593	2.58338e-14	1_red	cad
rpl5a	3.75107e-18	0.280947	0.856	0.719	5.61085e-14	1_red	rpl5a
cx34.5	4.88332e-18	0.318961	0.197	0.056	7.30446e-14	1_red	cx34.5
greb1	1.96335e-17	0.294005	0.544	0.29	2.93678e-13	1_red	greb1
SERP1	2.48624e-17	0.228599	1	0.975	3.71891e-13	1_red	SERP1
gmps	2.50367e-17	0.272353	0.915	0.665	3.74499e-13	1_red	gmps
her2	2.59925e-17	0.384492	0.606	0.354	3.88796e-13	1_red	her2
rplp1	2.8056e-17	0.158135	1	0.998	4.19662e-13	1_red	rplp1
klhl41b	4.64503e-17	0.104199	0.135	0.028	6.94803e-13	1_red	klhl41b
fscn1a	5.21419e-17	0.274138	0.468	0.228	7.79939e-13	1_red	fscn1a
col4a5	7.98248e-17	0.264349	0.89	0.692	1.19402e-12	1_red	col4a5
cmah	9.01858e-17	0.118127	0.166	0.042	1.349e-12	1_red	cmah
si:dkey-225k4.1	1.01731e-16	0.261303	0.375	0.173	1.52169e-12	1_red	si:dkey-225k4.1
pik3ip1	1.36898e-16	0.274975	0.679	0.415	2.04772e-12	1_red	pik3ip1
slc7a11	1.42865e-16	0.20607	0.411	0.199	2.13697e-12	1_red	slc7a11
slc8a4b	1.97759e-16	0.207208	0.515	0.279	2.95808e-12	1_red	slc8a4b
atp5f1c	4.82714e-16	0.268348	0.665	0.409	7.22043e-12	1_red	atp5f1c
mt-nd2	5.30196e-16	0.268379	0.868	0.735	7.93067e-12	1_red	mt-nd2
kidins220a	5.47738e-16	0.227539	0.569	0.326	8.19306e-12	1_red	kidins220a
slc38a5b	5.55198e-16	0.315274	0.614	0.383	8.30465e-12	1_red	slc38a5b
mt-co1	6.17929e-16	0.132683	1	1	9.24298e-12	1_red	mt-co1
oaz1b	1.13301e-15	0.25211	0.901	0.792	1.69476e-11	1_red	oaz1b
cox6c	1.31533e-15	0.305977	0.558	0.328	1.96748e-11	1_red	cox6c
rpl8	1.9417e-15	0.150684	1	0.997	2.90439e-11	1_red	rpl8
mt-co3	1.05306e-14	0.141535	1	1	1.57516e-10	1_red	mt-co3
prps1a	2.39762e-14	0.237439	0.476	0.252	3.58637e-10	1_red	prps1a
cdh1	2.69966e-14	0.239452	0.915	0.743	4.03815e-10	1_red	cdh1
cox7a1	2.9574e-14	0.251745	0.287	0.125	4.42368e-10	1_red	cox7a1
p4ha1b	4.29738e-14	0.237291	0.248	0.096	6.42803e-10	1_red	p4ha1b
eef2b	5.24657e-14	0.23094	0.879	0.803	7.84782e-10	1_red	eef2b
cox7b	5.55132e-14	0.261068	0.493	0.275	8.30366e-10	1_red	cox7b
oaz1a	8.03258e-14	0.230488	0.983	0.914	1.20151e-09	1_red	oaz1a
pdia2	1.3343e-13	0.132027	0.07	0.008	1.99585e-09	1_red	pdia2
atp5pd	1.45116e-13	0.273213	0.651	0.439	2.17064e-09	1_red	atp5pd
ccdc187	1.55686e-13	0.244727	0.634	0.399	2.32875e-09	1_red	ccdc187
folr	1.63074e-13	0.139085	0.093	0.017	2.43926e-09	1_red	folr
atp5pf	1.78231e-13	0.255142	0.617	0.396	2.66597e-09	1_red	atp5pf
sulf2b	1.85101e-13	0.295502	0.456	0.263	2.76874e-09	1_red	sulf2b
leo1	1.88628e-13	0.163835	0.211	0.076	2.82149e-09	1_red	leo1
sestd1	4.6858e-13	0.205041	0.282	0.123	7.00902e-09	1_red	sestd1
atp1a1a.1	4.88314e-13	0.233229	0.887	0.775	7.3042e-09	1_red	atp1a1a.1
mt-nd4	6.35779e-13	0.192565	0.935	0.878	9.50998e-09	1_red	mt-nd4
slit2	6.91537e-13	0.231402	0.637	0.424	1.0344e-08	1_red	slit2
rps12	7.94384e-13	0.132636	1	0.999	1.18824e-08	1_red	rps12
adarb1a	8.42407e-13	0.136578	0.183	0.064	1.26007e-08	1_red	adarb1a
rdh8a	9.32244e-13	0.120392	0.177	0.06	1.39445e-08	1_red	rdh8a
COX5B	1.48777e-12	0.27839	0.662	0.446	2.22541e-08	1_red	COX5B
atp5f1d	1.63367e-12	0.217499	0.589	0.365	2.44365e-08	1_red	atp5f1d
phlda2	1.92596e-12	0.179982	0.913	0.796	2.88085e-08	1_red	phlda2
myclb	2.03214e-12	0.289735	0.521	0.319	3.03968e-08	1_red	myclb
bccip	2.8724e-12	0.203123	0.397	0.206	4.29654e-08	1_red	bccip
si:ch73-193i22.1	2.99424e-12	0.120034	0.2	0.075	4.47878e-08	1_red	si:ch73-193i22.1
cox7c	3.67207e-12	0.246652	0.58	0.362	5.49268e-08	1_red	cox7c
pnp5a	3.83175e-12	0.229355	0.662	0.432	5.73153e-08	1_red	pnp5a
gmpr2	3.86994e-12	0.23238	0.496	0.285	5.78866e-08	1_red	gmpr2
sos1	4.33791e-12	0.153423	0.389	0.208	6.48864e-08	1_red	sos1
sash1a	4.82256e-12	0.206151	0.321	0.155	7.21359e-08	1_red	sash1a
serbp1a	4.87901e-12	0.201286	0.918	0.826	7.29802e-08	1_red	serbp1a
zgc:174863	4.90281e-12	0.20316	0.941	0.799	7.33362e-08	1_red	zgc:174863
tnika	5.4345e-12	0.191197	0.324	0.157	8.12892e-08	1_red	tnika
impdh1b	6.66211e-12	0.211182	0.476	0.265	9.96519e-08	1_red	impdh1b
notch1b	6.72993e-12	0.203666	0.456	0.278	1.00666e-07	1_red	notch1b
ppl	7.32446e-12	0.204211	0.552	0.343	1.09559e-07	1_red	ppl
mt-nd1	7.40764e-12	0.229257	0.868	0.768	1.10803e-07	1_red	mt-nd1
glula	7.74641e-12	0.200639	0.242	0.103	1.15871e-07	1_red	glula
rpl10	8.09576e-12	0.128444	1	0.998	1.21096e-07	1_red	rpl10
slc1a3a	8.32207e-12	0.120556	0.234	0.098	1.24481e-07	1_red	slc1a3a
her4.2.1	8.70093e-12	0.288885	0.254	0.114	1.30149e-07	1_red	her4.2.1
rps3a	1.06684e-11	0.133977	1	0.998	1.59578e-07	1_red	rps3a
mycb	1.37719e-11	0.167047	0.93	0.785	2.06001e-07	1_red	mycb
pdgfra	1.59944e-11	0.215845	0.938	0.753	2.39244e-07	1_red	pdgfra
rps3	2.4675e-11	0.157706	0.997	0.981	3.69088e-07	1_red	rps3
uqcrc1	2.67284e-11	0.187598	0.42	0.229	3.99804e-07	1_red	uqcrc1
cox7a2a	2.76473e-11	0.192114	0.301	0.146	4.13548e-07	1_red	cox7a2a
gapdhs	2.96763e-11	0.199703	0.89	0.741	4.43898e-07	1_red	gapdhs
AL954696.1	2.99922e-11	0.167038	0.169	0.06	4.48624e-07	1_red	AL954696.1
cyp2x12.1	3.15414e-11	0.154363	0.324	0.165	4.71797e-07	1_red	cyp2x12.1
slc35f2	3.67056e-11	0.197841	0.656	0.416	5.49042e-07	1_red	slc35f2
mef2aa	4.14241e-11	0.177428	0.487	0.3	6.19621e-07	1_red	mef2aa
ndufs8a	4.14758e-11	0.160187	0.296	0.14	6.20396e-07	1_red	ndufs8a
slc11a2	4.84323e-11	0.120137	0.135	0.042	7.24451e-07	1_red	slc11a2
ndufv2	5.52961e-11	0.13938	0.186	0.071	8.2712e-07	1_red	ndufv2
frmd6	5.75079e-11	0.151724	0.245	0.113	8.60203e-07	1_red	frmd6
PLEKHH3	6.80529e-11	0.166362	0.383	0.214	1.01794e-06	1_red	PLEKHH3
slc38a4	7.73793e-11	0.19882	0.521	0.326	1.15744e-06	1_red	slc38a4
hmgb3b	8.72871e-11	0.178362	0.265	0.124	1.30564e-06	1_red	hmgb3b
selenop	9.13432e-11	0.188964	0.972	0.882	1.36631e-06	1_red	selenop
si:ch211-240l19.5	9.28357e-11	0.273738	0.428	0.26	1.38864e-06	1_red	si:ch211-240l19.5
errfi1a	9.35909e-11	0.172123	0.459	0.273	1.39993e-06	1_red	errfi1a
mibp2	9.50949e-11	0.267595	0.538	0.358	1.42243e-06	1_red	mibp2
gstt1b	1.0083e-10	0.218505	0.885	0.776	1.50822e-06	1_red	gstt1b
abce1	1.03288e-10	0.112625	0.121	0.035	1.54498e-06	1_red	abce1
uqcr10	1.13081e-10	0.224631	0.256	0.118	1.69146e-06	1_red	uqcr10
plekhg4	1.38271e-10	0.215759	0.625	0.399	2.06826e-06	1_red	plekhg4
ndufb10	1.40557e-10	0.189203	0.366	0.202	2.10245e-06	1_red	ndufb10
gtpbp4	1.40912e-10	0.210884	0.524	0.348	2.10777e-06	1_red	gtpbp4
her4.3	1.43767e-10	0.155745	0.121	0.036	2.15047e-06	1_red	her4.3
si:zfos-464b6.2	1.52879e-10	0.190991	0.355	0.188	2.28676e-06	1_red	si:zfos-464b6.2
cldn7a	1.56985e-10	0.306431	0.628	0.443	2.34819e-06	1_red	cldn7a
eif4ebp3	1.57531e-10	0.193335	0.411	0.232	2.35635e-06	1_red	eif4ebp3
srpra	1.90563e-10	0.193803	0.845	0.648	2.85045e-06	1_red	srpra
cox6a1	1.97844e-10	0.236018	0.549	0.363	2.95936e-06	1_red	cox6a1
npm1a	2.07112e-10	0.233734	0.389	0.221	3.09798e-06	1_red	npm1a
efna1b	2.15222e-10	0.173037	0.287	0.143	3.2193e-06	1_red	efna1b
nop58	2.32981e-10	0.167524	0.338	0.177	3.48492e-06	1_red	nop58
ednrab	2.60856e-10	0.136803	0.279	0.138	3.90189e-06	1_red	ednrab
idh2	3.10465e-10	0.200349	0.42	0.247	4.64394e-06	1_red	idh2
cycsb	3.72731e-10	0.184141	0.397	0.218	5.57531e-06	1_red	cycsb
odc1	4.89442e-10	0.186525	0.414	0.229	7.32107e-06	1_red	odc1
ndufa4l	5.58691e-10	0.184076	0.851	0.769	8.35689e-06	1_red	ndufa4l
atp5l	6.40678e-10	0.2462	0.575	0.397	9.58325e-06	1_red	atp5l
mpc2	7.2897e-10	0.17029	0.341	0.182	1.09039e-05	1_red	mpc2
rpl17	7.66581e-10	0.115955	1	0.997	1.14665e-05	1_red	rpl17
cyc1	8.3775e-10	0.17126	0.363	0.198	1.25311e-05	1_red	cyc1
slc7a10a	1.00437e-09	0.165366	0.603	0.38	1.50233e-05	1_red	slc7a10a
ptp4a2b	1.13515e-09	0.208258	0.532	0.335	1.69796e-05	1_red	ptp4a2b
rpl19	1.14086e-09	0.104128	1	0.999	1.7065e-05	1_red	rpl19
rps2	1.24068e-09	0.132059	0.994	0.988	1.8558e-05	1_red	rps2
uqcrc2b	1.39871e-09	0.145441	0.206	0.089	2.09219e-05	1_red	uqcrc2b
rps6	1.46623e-09	0.158732	0.952	0.924	2.19319e-05	1_red	rps6
atp5f1e	1.51251e-09	0.240124	0.566	0.393	2.26241e-05	1_red	atp5f1e
rpsa	1.67071e-09	0.134438	0.994	0.983	2.49904e-05	1_red	rpsa
ndufs6	1.77105e-09	0.124701	0.22	0.098	2.64914e-05	1_red	ndufs6
rpl10a	2.05771e-09	0.120493	0.997	0.997	3.07792e-05	1_red	rpl10a
cox8a	2.38517e-09	0.17533	0.735	0.552	3.56773e-05	1_red	cox8a
atp5if1b	2.5781e-09	0.186615	0.515	0.33	3.85632e-05	1_red	atp5if1b
naca	2.86008e-09	0.125605	0.992	0.984	4.27811e-05	1_red	naca
atp5pb	2.8962e-09	0.227011	0.67	0.502	4.33214e-05	1_red	atp5pb
ponzr1	3.07249e-09	0.151807	1	0.965	4.59583e-05	1_red	ponzr1
wu:fb59d01	3.09483e-09	0.113254	0.203	0.091	4.62925e-05	1_red	wu:fb59d01
ndufb5	3.17776e-09	0.168989	0.372	0.212	4.7533e-05	1_red	ndufb5
slc25a3b	3.34372e-09	0.209501	0.755	0.62	5.00153e-05	1_red	slc25a3b
sdha	3.52941e-09	0.155974	0.259	0.129	5.27929e-05	1_red	sdha
limch1b	3.72647e-09	0.11904	0.315	0.171	5.57405e-05	1_red	limch1b
ivns1abpa	4.04883e-09	0.190173	0.997	0.863	6.05624e-05	1_red	ivns1abpa
ppargc1b	4.63234e-09	0.161529	0.538	0.338	6.92905e-05	1_red	ppargc1b
wnt9b	5.41663e-09	0.171171	0.403	0.249	8.1022e-05	1_red	wnt9b
cox6b2	5.55507e-09	0.199143	0.78	0.656	8.30927e-05	1_red	cox6b2
ndufa8	6.51603e-09	0.1572	0.346	0.195	9.74668e-05	1_red	ndufa8
prpsap2	6.74297e-09	0.139268	0.254	0.125	0.000100861	1_red	prpsap2
nme2b.1	6.74694e-09	0.131995	0.992	0.979	0.000100921	1_red	nme2b.1
si:ch211-136a13.1	7.40297e-09	0.129145	0.282	0.151	0.000110734	1_red	si:ch211-136a13.1
slc38a3b	7.43624e-09	0.151003	0.321	0.186	0.000111231	1_red	slc38a3b
mdh2	7.49497e-09	0.228818	0.572	0.405	0.00011211	1_red	mdh2
atp5po	7.70915e-09	0.196378	0.608	0.443	0.000115313	1_red	atp5po
hsf2	8.0042e-09	0.166675	0.285	0.151	0.000119727	1_red	hsf2
ackr4b	8.16698e-09	0.151097	0.682	0.462	0.000122162	1_red	ackr4b
si:dkey-194e6.1	8.53803e-09	0.153373	0.265	0.139	0.000127712	1_red	si:dkey-194e6.1
ampd2b	9.54728e-09	0.140213	0.499	0.329	0.000142808	1_red	ampd2b
denr	9.68305e-09	0.144945	0.231	0.112	0.000144839	1_red	denr
got2b	1.03564e-08	0.142047	0.214	0.1	0.000154911	1_red	got2b
rpl7	1.46231e-08	0.113716	1	0.997	0.000218732	1_red	rpl7
pgm2	1.59692e-08	0.144988	0.535	0.354	0.000238867	1_red	pgm2
ppfibp1b	1.65785e-08	0.116472	0.318	0.179	0.000247982	1_red	ppfibp1b
mrps36	1.72586e-08	0.134349	0.248	0.123	0.000258155	1_red	mrps36
akap13	1.83699e-08	0.160247	0.355	0.21	0.000274777	1_red	akap13
lrp1aa	1.87397e-08	0.131669	0.197	0.092	0.000280309	1_red	lrp1aa
sb:cb81	2.17404e-08	0.168114	0.513	0.343	0.000325192	1_red	sb:cb81
mibp	2.30649e-08	0.148967	0.104	0.033	0.000345005	1_red	mibp
ndufb2	2.35608e-08	0.161304	0.341	0.198	0.000352422	1_red	ndufb2
CTBP1	2.87904e-08	0.13364	0.468	0.302	0.000430646	1_red	CTBP1
col4a6	3.17308e-08	0.188743	0.8	0.667	0.000474629	1_red	col4a6
zgc:193541	3.55988e-08	0.188937	0.558	0.383	0.000532486	1_red	zgc:193541
ano5b	3.65243e-08	0.152983	0.431	0.282	0.00054633	1_red	ano5b
zfand5b	3.69914e-08	0.189896	0.313	0.175	0.000553317	1_red	zfand5b
sdhdb	3.95105e-08	0.133017	0.22	0.107	0.000590998	1_red	sdhdb
cox5aa	4.39447e-08	0.205723	0.538	0.361	0.000657325	1_red	cox5aa
si:dkey-31f5.11	4.54136e-08	0.131536	0.454	0.295	0.000679297	1_red	si:dkey-31f5.11
txn2	4.55963e-08	0.12285	0.206	0.098	0.000682029	1_red	txn2
mt-nd5	4.57678e-08	0.193342	0.507	0.348	0.000684594	1_red	mt-nd5
tdh	4.60309e-08	0.158188	0.546	0.358	0.00068853	1_red	tdh
suclg1	4.61447e-08	0.118836	0.208	0.099	0.000690233	1_red	suclg1
vdac2	5.04484e-08	0.188399	0.651	0.484	0.000754607	1_red	vdac2
ompa	5.15142e-08	0.104108	0.166	0.072	0.000770549	1_red	ompa
ube2nb	5.72269e-08	0.130136	0.217	0.106	0.000856	1_red	ube2nb
bckdk	6.04342e-08	0.14935	0.327	0.186	0.000903976	1_red	bckdk
cct3	6.34961e-08	0.220551	0.363	0.231	0.000949774	1_red	cct3
ndufa2	6.64562e-08	0.114818	0.149	0.062	0.000994052	1_red	ndufa2
drap1	6.77187e-08	0.15096	0.268	0.145	0.00101294	1_red	drap1
hmga1a	6.85531e-08	0.160834	0.285	0.156	0.00102542	1_red	hmga1a
rps17	7.15251e-08	0.201086	0.761	0.639	0.00106987	1_red	rps17
rplp0	8.58571e-08	0.132896	0.992	0.983	0.00128425	1_red	rplp0
cox4i1	8.82708e-08	0.17291	0.82	0.713	0.00132035	1_red	cox4i1
faua	9.09699e-08	0.106597	0.994	0.989	0.00136073	1_red	faua
ndufab1b	9.60851e-08	0.124987	0.282	0.152	0.00143724	1_red	ndufab1b
atp5mc3a	1.01216e-07	0.172862	0.546	0.369	0.00151399	1_red	atp5mc3a
mych	1.08531e-07	0.123096	0.208	0.101	0.00162341	1_red	mych
apmap	1.10058e-07	0.151268	0.245	0.13	0.00164625	1_red	apmap
cygb1	1.13318e-07	0.180405	0.451	0.288	0.001695	1_red	cygb1
si:ch211-132b12.7	1.13489e-07	0.142334	0.332	0.202	0.00169757	1_red	si:ch211-132b12.7
tspan18a	1.18781e-07	0.113487	0.183	0.087	0.00177673	1_red	tspan18a
hsp90ab1	1.33898e-07	0.134368	0.994	0.981	0.00200284	1_red	hsp90ab1
msi2a	1.38762e-07	0.127115	0.456	0.3	0.0020756	1_red	msi2a
aldoaa	1.45977e-07	0.157851	0.955	0.83	0.00218353	1_red	aldoaa
ldhba	1.47953e-07	0.192968	0.437	0.283	0.00221307	1_red	ldhba
rpl9.1	1.48927e-07	0.106639	0.997	0.995	0.00222764	1_red	rpl9.1
mafba	1.6984e-07	0.186828	0.341	0.203	0.00254047	1_red	mafba
mrpl12	1.76768e-07	0.133167	0.158	0.07	0.0026441	1_red	mrpl12
nhsl2	2.14126e-07	0.136189	0.51	0.335	0.0032029	1_red	nhsl2
rps5	2.36165e-07	0.100577	0.997	0.997	0.00353255	1_red	rps5
zgc:194839	2.42378e-07	0.130843	0.31	0.186	0.00362549	1_red	zgc:194839
sdhb	2.45566e-07	0.120803	0.293	0.163	0.00367317	1_red	sdhb
pno1	2.50573e-07	0.154453	0.358	0.222	0.00374807	1_red	pno1
rack1	2.54045e-07	0.114448	0.994	0.985	0.00380001	1_red	rack1
cct4	2.57669e-07	0.16031	0.428	0.279	0.00385421	1_red	cct4
cd3eap	2.65759e-07	0.1016	0.132	0.054	0.00397523	1_red	cd3eap
btf3	2.71254e-07	0.176906	0.856	0.769	0.00405741	1_red	btf3
ndufab1a	2.78942e-07	0.136253	0.268	0.148	0.00417242	1_red	ndufab1a
hey2	2.97577e-07	0.169093	0.67	0.471	0.00445116	1_red	hey2
ccser2a	3.0469e-07	0.131094	0.442	0.297	0.00455755	1_red	ccser2a
hspa9	3.16992e-07	0.105756	0.282	0.155	0.00474157	1_red	hspa9
uqcrb	3.19764e-07	0.130296	0.462	0.297	0.00478303	1_red	uqcrb
atp1b3a	3.2155e-07	0.133469	0.285	0.169	0.00480975	1_red	atp1b3a
c1qbp	3.28838e-07	0.12163	0.31	0.176	0.00491876	1_red	c1qbp
ddx21	3.29307e-07	0.162349	0.417	0.277	0.00492578	1_red	ddx21
rwdd1	3.4166e-07	0.12847	0.197	0.098	0.00511056	1_red	rwdd1
ndufa6	3.55319e-07	0.153006	0.349	0.213	0.00531486	1_red	ndufa6
her15.1	3.71238e-07	0.197408	0.158	0.071	0.00555298	1_red	her15.1
uqcrfs1	3.89685e-07	0.147632	0.42	0.268	0.00582891	1_red	uqcrfs1
eif4g1a	4.04763e-07	0.137983	0.282	0.159	0.00605444	1_red	eif4g1a
si:ch211-156j16.1	4.51891e-07	0.170339	0.394	0.253	0.00675939	1_red	si:ch211-156j16.1
sept7a	4.65243e-07	0.161316	0.437	0.283	0.0069591	1_red	sept7a
ndufs7	4.68632e-07	0.137701	0.332	0.202	0.00700979	1_red	ndufs7
serpinh1a	4.72853e-07	0.119792	0.411	0.269	0.00707294	1_red	serpinh1a
ndufv3	4.82531e-07	0.120738	0.211	0.107	0.0072177	1_red	ndufv3
atrx	5.30106e-07	0.167021	0.746	0.622	0.00792933	1_red	atrx
celsr1a	5.99945e-07	0.113798	0.31	0.189	0.00897397	1_red	celsr1a
kars	6.14013e-07	0.123422	0.203	0.104	0.0091844	1_red	kars
vdac3	6.46805e-07	0.145312	0.287	0.168	0.00967491	1_red	vdac3
antxr1c	7.765e-07	0.163807	0.558	0.394	0.0116149	1_red	antxr1c
vbp1	7.93935e-07	0.107907	0.169	0.08	0.0118757	1_red	vbp1
ppp2cb	7.99878e-07	0.159948	0.431	0.292	0.0119646	1_red	ppp2cb
znf395b	8.0541e-07	0.137837	0.425	0.274	0.0120473	1_red	znf395b
ddt	8.15112e-07	0.158479	0.355	0.222	0.0121924	1_red	ddt
her15.2	8.24764e-07	0.213144	0.118	0.048	0.0123368	1_red	her15.2
tmed10	9.10281e-07	0.147327	0.47	0.319	0.013616	1_red	tmed10
ptgr1	9.70151e-07	0.133455	0.192	0.098	0.0145115	1_red	ptgr1
gpia	9.82672e-07	0.128615	0.242	0.134	0.0146988	1_red	gpia
mrps2	1.03355e-06	0.103474	0.262	0.153	0.0154599	1_red	mrps2
ndufb9	1.15661e-06	0.128143	0.386	0.245	0.0173005	1_red	ndufb9
fth1a	1.25208e-06	0.206575	0.687	0.588	0.0187286	1_red	fth1a
hnrnpa0b	1.312e-06	0.154675	0.532	0.371	0.019625	1_red	hnrnpa0b
mrpl36	1.39162e-06	0.134984	0.256	0.146	0.0208158	1_red	mrpl36
nrp2a	1.39615e-06	0.117366	0.654	0.479	0.0208835	1_red	nrp2a
cnbpa	1.47691e-06	0.146273	0.49	0.34	0.0220917	1_red	cnbpa
cct7	1.56684e-06	0.15229	0.47	0.326	0.0234368	1_red	cct7
tbca	1.63008e-06	0.13648	0.372	0.242	0.0243827	1_red	tbca
id3	1.89186e-06	0.165482	0.623	0.454	0.0282984	1_red	id3
vwde	2.01645e-06	0.111089	0.144	0.067	0.0301621	1_red	vwde
ndufs3	2.15454e-06	0.11666	0.18	0.091	0.0322277	1_red	ndufs3
zgc:123105	2.25599e-06	0.13652	0.327	0.202	0.0337452	1_red	zgc:123105
ndufs5	2.32e-06	0.117374	0.251	0.142	0.0347026	1_red	ndufs5
atp5mc1	2.39464e-06	0.188134	0.299	0.184	0.035819	1_red	atp5mc1
myl9a	2.40465e-06	0.135381	0.814	0.688	0.0359688	1_red	myl9a
cishb	2.48599e-06	0.131348	0.301	0.18	0.0371855	1_red	cishb
chd4b	2.55328e-06	0.13506	0.251	0.146	0.0381919	1_red	chd4b
ndufa3	3.09244e-06	0.105445	0.245	0.137	0.0462567	1_red	ndufa3
her4.1	3.11906e-06	0.226105	0.225	0.126	0.0466549	1_red	her4.1
swap70b	3.26182e-06	0.106005	0.29	0.172	0.0487903	1_red	swap70b
atp5md	3.27325e-06	0.105803	0.327	0.196	0.0489613	1_red	atp5md
nrarpb	3.29946e-06	0.121122	0.366	0.24	0.0493533	1_red	nrarpb
chac1	3.57307e-06	0.209732	0.628	0.507	0.053446	1_red	chac1
ndufs2	3.88452e-06	0.109995	0.223	0.123	0.0581046	1_red	ndufs2
agap1	3.99767e-06	0.106874	0.327	0.209	0.0597972	1_red	agap1
ADGRL3	4.08751e-06	0.120716	0.408	0.279	0.0611409	1_red	ADGRL3
prdx3	4.19677e-06	0.109677	0.194	0.103	0.0627752	1_red	prdx3
rpl3	4.33033e-06	0.127229	0.946	0.927	0.064773	1_red	rpl3
rps18	4.37729e-06	0.120296	0.927	0.901	0.0654756	1_red	rps18
magoh	4.43485e-06	0.109055	0.192	0.1	0.0663364	1_red	magoh
gne	4.56411e-06	0.117722	0.107	0.045	0.06827	1_red	gne
ran	4.77129e-06	0.179279	0.713	0.594	0.071369	1_red	ran
ncl	4.9551e-06	0.161493	0.575	0.428	0.0741185	1_red	ncl
ndufa1	5.01463e-06	0.143554	0.335	0.215	0.0750088	1_red	ndufa1
atp5mf	5.0344e-06	0.140549	0.361	0.231	0.0753045	1_red	atp5mf
eif4ebp1	5.58568e-06	0.137764	0.614	0.453	0.0835505	1_red	eif4ebp1
nop56	5.63038e-06	0.136733	0.425	0.291	0.0842192	1_red	nop56
ndufb8	5.84382e-06	0.130498	0.546	0.39	0.0874118	1_red	ndufb8
fam120a	5.98954e-06	0.121751	0.535	0.39	0.0895916	1_red	fam120a
trnau1apb	6.51406e-06	0.106698	0.163	0.083	0.0974372	1_red	trnau1apb
basp1	6.63357e-06	0.111422	0.38	0.254	0.0992249	1_red	basp1
wnt4a	6.99518e-06	0.11895	0.589	0.41	0.104634	1_red	wnt4a
ptbp3	7.10412e-06	0.116722	0.383	0.267	0.106263	1_red	ptbp3
si:ch211-191j22.3	7.3241e-06	0.101259	0.254	0.148	0.109554	1_red	si:ch211-191j22.3
naprt	7.51563e-06	0.113346	0.383	0.263	0.112419	1_red	naprt
STMP1	7.75265e-06	0.11296	0.375	0.243	0.115964	1_red	STMP1
pttg1ipb	8.54211e-06	0.137115	0.2	0.112	0.127773	1_red	pttg1ipb
dldh	9.35403e-06	0.110068	0.239	0.139	0.139918	1_red	dldh
mrpl54	9.63379e-06	0.101343	0.197	0.107	0.144102	1_red	mrpl54
bambia	1.10432e-05	0.12354	0.73	0.561	0.165184	1_red	bambia
elocb	1.11736e-05	0.107212	0.324	0.204	0.167134	1_red	elocb
snu13b	1.1662e-05	0.123547	0.197	0.107	0.17444	1_red	snu13b
ndufa11	1.25499e-05	0.10596	0.192	0.104	0.187722	1_red	ndufa11
aldh6a1	1.2695e-05	0.112388	0.262	0.157	0.189892	1_red	aldh6a1
pabpc1a	1.32762e-05	0.157838	0.685	0.578	0.198585	1_red	pabpc1a
smad2	1.37036e-05	0.139613	0.4	0.271	0.204979	1_red	smad2
crip2	1.41934e-05	0.118197	0.307	0.202	0.212304	1_red	crip2
cyth1a.1	1.43741e-05	0.135442	0.251	0.156	0.215007	1_red	cyth1a.1
pgk1	1.61655e-05	0.104455	0.276	0.168	0.241804	1_red	pgk1
bhlhe41	1.62825e-05	0.103455	0.265	0.165	0.243553	1_red	bhlhe41
BX284696.1	1.71822e-05	0.201593	0.358	0.253	0.257011	1_red	BX284696.1
atp5mea	1.82275e-05	0.132784	0.366	0.249	0.272647	1_red	atp5mea
TXN	2.09157e-05	0.150676	0.763	0.651	0.312858	1_red	TXN
pkma	2.1775e-05	0.128341	0.769	0.62	0.32571	1_red	pkma
eef1da	2.18536e-05	0.15284	0.524	0.383	0.326886	1_red	eef1da
ier2b	2.25343e-05	0.143117	0.865	0.714	0.337067	1_red	ier2b
serpine1	2.26406e-05	0.10977	0.208	0.119	0.338658	1_red	serpine1
atp5if1a	2.27237e-05	0.14009	0.301	0.192	0.339902	1_red	atp5if1a
her4.2	2.41826e-05	0.118032	0.175	0.096	0.361724	1_red	her4.2
pim2	2.45273e-05	0.128305	0.518	0.371	0.366879	1_red	pim2
rpl22l1	2.56616e-05	0.165053	0.518	0.387	0.383846	1_red	rpl22l1
eif4ebp3l	2.67328e-05	0.108082	0.499	0.346	0.39987	1_red	eif4ebp3l
metrn	2.76168e-05	0.105418	0.603	0.443	0.413092	1_red	metrn
etfa	3.0269e-05	0.107835	0.225	0.136	0.452763	1_red	etfa
hmgb1b	3.05361e-05	0.128335	0.532	0.384	0.456759	1_red	hmgb1b
tomm7	3.16082e-05	0.100134	0.273	0.168	0.472796	1_red	tomm7
ctsla	3.54028e-05	0.126502	0.738	0.611	0.529556	1_red	ctsla
h3f3b.1.1	3.62797e-05	0.133696	0.772	0.678	0.542672	1_red	h3f3b.1.1
prmt1	3.67037e-05	0.11417	0.214	0.125	0.549013	1_red	prmt1
ttll12	4.05921e-05	0.124767	0.211	0.127	0.607177	1_red	ttll12
dab2ipb	4.43453e-05	0.108415	0.496	0.364	0.663317	1_red	dab2ipb
ube2v2	4.62721e-05	0.125368	0.437	0.31	0.692138	1_red	ube2v2
eef1b2	4.83101e-05	0.143585	0.879	0.823	0.722622	1_red	eef1b2
sept9a	4.85244e-05	0.106722	0.544	0.399	0.725828	1_red	sept9a
seta	4.89103e-05	0.104818	0.445	0.318	0.7316	1_red	seta
wsb1	6.20438e-05	0.106144	0.248	0.155	0.928051	1_red	wsb1
si:dkey-73n10.1	6.38902e-05	0.110895	0.507	0.358	0.955669	1_red	si:dkey-73n10.1
gmnn	6.39735e-05	0.13163	0.69	0.547	0.956915	1_red	gmnn
ndufb4	6.81323e-05	0.116538	0.338	0.23	1	1_red	ndufb4
eif3m	7.48607e-05	0.166556	0.583	0.462	1	1_red	eif3m
rpl5b	7.48667e-05	0.137966	0.842	0.751	1	1_red	rpl5b
setb	7.57563e-05	0.132163	0.369	0.258	1	1_red	setb
uqcrq	7.689e-05	0.114736	0.361	0.249	1	1_red	uqcrq
RASSF5	7.76064e-05	0.101057	0.299	0.201	1	1_red	RASSF5
ranbp1	9.48365e-05	0.105474	0.423	0.302	1	1_red	ranbp1
eif2s1b	0.000104047	0.110214	0.372	0.259	1	1_red	eif2s1b
bzw1b	0.000120863	0.110189	0.383	0.263	1	1_red	bzw1b
fbl	0.000135397	0.105447	0.251	0.159	1	1_red	fbl
si:dkey-42i9.4	0.000157047	0.101124	0.372	0.262	1	1_red	si:dkey-42i9.4
h3f3d	0.000162053	0.122518	0.803	0.733	1	1_red	h3f3d
rpl29	0.000192468	0.122477	0.848	0.774	1	1_red	rpl29
dkc1	0.00021577	0.100877	0.211	0.13	1	1_red	dkc1
skp1	0.000216258	0.103849	0.487	0.362	1	1_red	skp1
eif2s3	0.000273142	0.114667	0.417	0.306	1	1_red	eif2s3
hspb11	0.00028878	0.181375	0.076	0.033	1	1_red	hspb11
eif3f	0.000291425	0.132836	0.735	0.615	1	1_red	eif3f
h3f3b.1.2	0.000301227	0.101249	0.47	0.351	1	1_red	h3f3b.1.2
trib3	0.000306392	0.119777	0.197	0.123	1	1_red	trib3
hspa8	0.000325521	0.18241	0.673	0.57	1	1_red	hspa8
eif3ba	0.000339018	0.106868	0.392	0.286	1	1_red	eif3ba
ctnnb1	0.000367573	0.104766	0.465	0.353	1	1_red	ctnnb1
map1lc3a	0.000371035	0.103859	0.468	0.346	1	1_red	map1lc3a
hnrnpa1b	0.000376588	0.10321	0.366	0.259	1	1_red	hnrnpa1b
agtr2	0.000399207	0.10808	0.282	0.193	1	1_red	agtr2
rbm8a	0.000436869	0.101775	0.397	0.292	1	1_red	rbm8a
aldh1a2	0.000443508	0.106538	0.71	0.603	1	1_red	aldh1a2
sat1a.2	0.000490913	0.109593	0.617	0.516	1	1_red	sat1a.2
tcp1	0.000575566	0.111672	0.352	0.258	1	1_red	tcp1
hspe1	0.000589085	0.107897	0.786	0.663	1	1_red	hspe1
plk3	0.000674591	0.106236	0.259	0.178	1	1_red	plk3
mgst1.2	0.000677426	0.103793	0.208	0.135	1	1_red	mgst1.2
cirbpa	0.000695989	0.138731	0.496	0.389	1	1_red	cirbpa
hnrnpabb	0.00110181	0.110537	0.346	0.247	1	1_red	hnrnpabb
her6	0.00179572	0.14404	0.594	0.541	1	1_red	her6
rpl4	0.00184864	0.119539	0.639	0.547	1	1_red	rpl4
si:busm1-57f23.1	0.00201493	0.121013	0.313	0.227	1	1_red	si:busm1-57f23.1
rpl6	0.00211845	0.133467	0.637	0.551	1	1_red	rpl6
khdrbs1a	0.00217425	0.125338	0.549	0.448	1	1_red	khdrbs1a
prkab1b	0.00224412	0.100831	0.366	0.274	1	1_red	prkab1b
igf2b	0.00298629	0.178144	0.358	0.288	1	1_red	igf2b

## Sheet: SC1 (yellow)
	p_val	avg_logFC	pct.1	pct.2	p_val_adj	cluster	gene
hsp70.2	7.49717e-87	0.782751	0.997	0.896	1.12143e-82	1_yellow	hsp70.2
hsp70.3	2.44225e-82	0.792797	0.994	0.863	3.65311e-78	1_yellow	hsp70.3
fosab	2.0547e-79	0.604672	1	0.941	3.07342e-75	1_yellow	fosab
mycb1	3.01688e-77	0.924791	0.963	0.777	4.51264e-73	1_yellow	mycb
jun	5.69138e-75	0.595204	1	0.934	8.51317e-71	1_yellow	jun
btg2	1.19688e-73	0.644609	1	0.907	1.79029e-69	1_yellow	btg2
hsp70.1	7.04148e-72	0.746357	0.994	0.88	1.05326e-67	1_yellow	hsp70.1
phlda21	2.20948e-66	0.922736	0.949	0.787	3.30493e-62	1_yellow	phlda2
gadd45ba	4.93355e-59	0.703253	0.98	0.854	7.37961e-55	1_yellow	gadd45ba
junba	2.5692e-54	0.630041	0.986	0.865	3.843e-50	1_yellow	junba
mcl1a	1.78912e-51	0.711867	0.943	0.733	2.67617e-47	1_yellow	mcl1a
socs3a	1.04571e-48	0.56667	0.989	0.916	1.56417e-44	1_yellow	socs3a
f3b	2.08351e-46	0.812197	0.855	0.541	3.11651e-42	1_yellow	f3b
fosl1a	1.036e-45	0.632567	0.889	0.577	1.54965e-41	1_yellow	fosl1a
sdc4	6.18948e-42	0.645919	0.864	0.591	9.25823e-38	1_yellow	sdc4
sat1a.21	1.01176e-39	0.717348	0.764	0.48	1.51339e-35	1_yellow	sat1a.2
atf3	4.5153e-38	0.833589	0.676	0.367	6.75399e-34	1_yellow	atf3
UBB	4.29183e-37	0.708408	0.776	0.539	6.41973e-33	1_yellow	UBB
atf4b	4.451e-37	0.458242	0.898	0.727	6.65781e-33	1_yellow	atf4b
cishb1	2.77306e-34	0.652877	0.423	0.151	4.14795e-30	1_yellow	cishb
glulb1	3.32732e-34	0.450707	0.991	0.854	4.97701e-30	1_yellow	glulb
higd1a	1.3433e-33	0.522165	0.631	0.34	2.00931e-29	1_yellow	higd1a
hsp70l	3.08191e-32	0.683314	0.835	0.633	4.60992e-28	1_yellow	hsp70l
jdp2b	1.74681e-31	0.485124	0.957	0.804	2.61287e-27	1_yellow	jdp2b
hsp90aa1.2	4.68747e-31	0.623762	0.841	0.592	7.01152e-27	1_yellow	hsp90aa1.2
ddit3	1.02295e-30	0.592168	0.798	0.586	1.53013e-26	1_yellow	ddit3
arrdc3a1	8.01002e-30	0.597423	0.656	0.386	1.19814e-25	1_yellow	arrdc3a
prelid3b	1.35227e-29	0.564928	0.534	0.272	2.02272e-25	1_yellow	prelid3b
dnajb1b	3.21349e-29	0.494862	0.861	0.631	4.80673e-25	1_yellow	dnajb1b
ier2b1	5.90202e-29	0.481956	0.906	0.705	8.82825e-25	1_yellow	ier2b
pnp4a1	1.21181e-28	0.525259	0.855	0.61	1.81263e-24	1_yellow	pnp4a
ier2a	2.9022e-28	0.408432	0.875	0.662	4.34112e-24	1_yellow	ier2a
cldn11a1	3.18774e-28	0.359445	0.997	0.955	4.76822e-24	1_yellow	cldn11a
egr1	1.39591e-27	0.405648	0.878	0.618	2.088e-23	1_yellow	egr1
her21	9.54323e-27	0.941854	0.599	0.356	1.42748e-22	1_yellow	her2
junbb	9.05487e-26	0.503592	0.611	0.382	1.35443e-21	1_yellow	junbb
slc25a51	3.67416e-25	0.249077	1	0.997	5.49581e-21	1_yellow	slc25a5
ecm1b1	1.08555e-23	0.354959	0.989	0.835	1.62376e-19	1_yellow	ecm1b
nrarpa1	1.89943e-23	0.411215	0.807	0.593	2.84117e-19	1_yellow	nrarpa
angptl41	1.36234e-21	0.581093	0.642	0.385	2.0378e-17	1_yellow	angptl4
fosb	1.71895e-21	0.281671	0.974	0.807	2.5712e-17	1_yellow	fosb
dusp1	2.42278e-21	0.558546	0.537	0.315	3.624e-17	1_yellow	dusp1
ier5	3.1261e-21	0.37992	0.778	0.537	4.67602e-17	1_yellow	ier5
tsc22d1	3.85598e-21	0.54011	0.432	0.221	5.76778e-17	1_yellow	tsc22d1
egr2b	1.28078e-20	0.622542	0.281	0.102	1.91579e-16	1_yellow	egr2b
pim21	4.71735e-19	0.434827	0.562	0.361	7.05621e-15	1_yellow	pim2
klf6a	5.21834e-19	0.377656	0.923	0.811	7.80559e-15	1_yellow	klf6a
errfi1a1	1.21528e-18	0.342603	0.486	0.267	1.81781e-14	1_yellow	errfi1a
chac11	1.31636e-18	0.504315	0.668	0.498	1.96901e-14	1_yellow	chac1
ctsla1	1.45149e-18	0.459216	0.767	0.604	2.17114e-14	1_yellow	ctsla
actb1	6.75731e-18	0.341998	0.94	0.863	1.01076e-13	1_yellow	actb1
myclb1	2.33334e-17	0.514026	0.511	0.322	3.4902e-13	1_yellow	myclb
appa1	2.52043e-16	0.266318	0.915	0.79	3.77005e-12	1_yellow	appa
pim1	3.0606e-16	0.354186	0.81	0.603	4.57805e-12	1_yellow	pim1
ppargc1b1	6.09733e-16	0.340495	0.545	0.337	9.12039e-12	1_yellow	ppargc1b
nrarpb1	9.67876e-16	0.229955	0.432	0.224	1.44775e-11	1_yellow	nrarpb
jund	1.83429e-15	0.333711	0.685	0.485	2.74373e-11	1_yellow	jund
sdk1a1	4.58901e-15	0.171075	0.307	0.133	6.86424e-11	1_yellow	sdk1a
trib31	5.7488e-15	0.405859	0.259	0.108	8.59906e-11	1_yellow	trib3
hspa81	6.81283e-15	0.377712	0.682	0.568	1.01906e-10	1_yellow	hspa8
her61	4.20562e-14	0.530447	0.679	0.521	6.29076e-10	1_yellow	her6
arg2	5.003e-14	0.137445	0.168	0.051	7.48348e-10	1_yellow	arg2
btbd6a	5.12399e-14	0.1897	0.389	0.203	7.66447e-10	1_yellow	btbd6a
bag3	8.16556e-14	0.219554	0.307	0.138	1.2214e-09	1_yellow	bag3
mef2aa1	8.56695e-14	0.225841	0.497	0.298	1.28144e-09	1_yellow	mef2aa
uck2a1	9.65757e-14	0.305222	0.608	0.393	1.44458e-09	1_yellow	uck2a
bhlhe40	1.41947e-13	0.335055	0.722	0.58	2.12324e-09	1_yellow	bhlhe40
egr2a	1.65186e-13	0.4686	0.338	0.18	2.47085e-09	1_yellow	egr2a
dclk1a	2.19326e-13	0.203734	0.264	0.112	3.28068e-09	1_yellow	dclk1a
zfand5b1	2.28454e-13	0.455919	0.324	0.172	3.41722e-09	1_yellow	zfand5b
dusp2	3.18155e-13	0.387637	0.58	0.393	4.75896e-09	1_yellow	dusp2
eya21	1.63456e-12	0.202249	0.403	0.227	2.44498e-08	1_yellow	eya2
si:dkey-240h12.3	2.12117e-12	0.151177	0.244	0.104	3.17284e-08	1_yellow	si:dkey-240h12.3
maff	4.4423e-12	0.203842	0.463	0.279	6.64479e-08	1_yellow	maff
ubb	5.16769e-12	0.386543	0.747	0.639	7.72983e-08	1_yellow	ubb
ccnl1a	9.40139e-12	0.277493	0.412	0.254	1.40626e-07	1_yellow	ccnl1a
hspb1	1.53016e-11	0.511859	0.685	0.58	2.28881e-07	1_yellow	hspb1
cebpb	1.86564e-11	0.504681	0.67	0.526	2.79062e-07	1_yellow	cebpb
si:dkey-194e6.11	3.98437e-11	0.148207	0.281	0.135	5.95982e-07	1_yellow	si:dkey-194e6.1
btg1	1.07498e-10	0.291475	0.795	0.689	1.60796e-06	1_yellow	btg1
cish	1.14773e-10	0.181542	0.259	0.124	1.71677e-06	1_yellow	cish
dap1b1	1.46212e-10	0.22502	0.991	0.871	2.18704e-06	1_yellow	dap1b
mafba1	1.82051e-10	0.39258	0.341	0.203	2.72312e-06	1_yellow	mafba
serpine11	2.80662e-10	0.538918	0.233	0.113	4.19815e-06	1_yellow	serpine1
srpra1	3.2626e-10	0.227248	0.801	0.659	4.88019e-06	1_yellow	srpra
notch31	4.24591e-10	0.212545	0.991	0.797	6.35103e-06	1_yellow	notch3
egr3	6.20223e-10	0.179887	0.264	0.131	9.2773e-06	1_yellow	egr3
kidins220a1	1.0545e-09	0.208952	0.506	0.342	1.57732e-05	1_yellow	kidins220a
hsd17b11	1.09013e-09	0.189488	0.849	0.668	1.63062e-05	1_yellow	hsd17b1
ptp4a2b1	1.13843e-09	0.252842	0.5	0.344	1.70286e-05	1_yellow	ptp4a2b
cycsb1	1.24139e-09	0.325654	0.361	0.227	1.85687e-05	1_yellow	cycsb
oaz1b1	1.80352e-09	0.205837	0.875	0.799	2.6977e-05	1_yellow	oaz1b
rhoab	3.7961e-09	0.359164	0.412	0.282	5.67821e-05	1_yellow	rhoab
sos11	4.30281e-09	0.146713	0.361	0.215	6.43615e-05	1_yellow	sos1
pnp5a1	5.1081e-09	0.284302	0.591	0.45	7.64069e-05	1_yellow	pnp5a
slc7a111	5.92583e-09	0.157771	0.361	0.212	8.86386e-05	1_yellow	slc7a11
id31	8.42848e-09	0.378381	0.585	0.463	0.000126073	1_yellow	id3
oaz1a1	8.96304e-09	0.170337	0.98	0.915	0.000134069	1_yellow	oaz1a
hprt11	1.16718e-08	0.269554	0.42	0.281	0.000174587	1_yellow	hprt1
celsr1a1	1.69112e-08	0.113831	0.327	0.185	0.000252958	1_yellow	celsr1a
si:ch73-217n20.11	1.87109e-08	0.160961	0.344	0.207	0.000279878	1_yellow	si:ch73-217n20.1
lfng	1.96313e-08	0.186686	0.131	0.05	0.000293645	1_yellow	lfng
gmps1	2.27274e-08	0.192833	0.832	0.685	0.000339956	1_yellow	gmps
pgm21	2.33851e-08	0.166848	0.528	0.356	0.000349795	1_yellow	pgm2
atp5mc3b1	2.4664e-08	0.17215	0.923	0.88	0.000368924	1_yellow	atp5mc3b
mknk2b	2.50426e-08	0.287852	0.656	0.553	0.000374587	1_yellow	mknk2b
colec111	3.01735e-08	0.2365	0.48	0.341	0.000451336	1_yellow	colec11
her4.21	3.4533e-08	0.234849	0.193	0.091	0.000516545	1_yellow	her4.2
hey1	4.05857e-08	0.128778	0.23	0.117	0.00060708	1_yellow	hey1
il4r.1.1	4.21929e-08	0.120157	0.216	0.107	0.000631122	1_yellow	il4r.1.1
mych1	4.53883e-08	0.250003	0.202	0.103	0.000678919	1_yellow	mych
plekho1b	5.8216e-08	0.12153	0.318	0.186	0.000870795	1_yellow	plekho1b
rsrp1	6.54735e-08	0.217463	0.568	0.438	0.000979352	1_yellow	rsrp1
cdh11	1.06012e-07	0.167368	0.886	0.75	0.00158573	1_yellow	cdh1
cry2	1.12666e-07	0.158857	0.384	0.253	0.00168527	1_yellow	cry2
zgc:162730	1.13445e-07	0.387633	0.608	0.49	0.00169691	1_yellow	zgc:162730
cbx4	1.18607e-07	0.153552	0.415	0.272	0.00177412	1_yellow	cbx4
tdh1	1.25228e-07	0.260681	0.503	0.369	0.00187316	1_yellow	tdh
atf4a	1.41374e-07	0.277014	0.5	0.401	0.00211468	1_yellow	atf4a
ptprfb1	1.56028e-07	0.202938	0.625	0.469	0.00233386	1_yellow	ptprfb
eif1b	2.33225e-07	0.192522	0.815	0.776	0.00348857	1_yellow	eif1b
CTBP11	2.37087e-07	0.161348	0.443	0.308	0.00354635	1_yellow	CTBP1
inhbaa1	2.94132e-07	0.235151	0.511	0.382	0.00439963	1_yellow	inhbaa
vegfaa	3.7798e-07	0.126415	0.497	0.342	0.00565382	1_yellow	vegfaa
gmnn1	4.5622e-07	0.21312	0.673	0.551	0.00682414	1_yellow	gmnn
wnt4a1	4.7149e-07	0.234888	0.551	0.42	0.00705255	1_yellow	wnt4a
atp5fa11	4.95086e-07	0.19653	0.727	0.628	0.00740549	1_yellow	atp5fa1
ivns1abpa1	5.24689e-07	0.163982	0.997	0.863	0.0078483	1_yellow	ivns1abpa
fbln51	6.40727e-07	0.292846	0.273	0.164	0.00958399	1_yellow	fbln5
slc20a1b	8.03045e-07	0.170441	0.134	0.059	0.0120119	1_yellow	slc20a1b
prnprs3	9.80708e-07	0.100906	0.27	0.158	0.0146694	1_yellow	prnprs3
jam3b	1.06629e-06	0.122041	0.335	0.214	0.0159496	1_yellow	jam3b
mpped2	1.2369e-06	0.105874	0.213	0.116	0.0185015	1_yellow	mpped2
sort1a1	1.48095e-06	0.132763	0.412	0.282	0.0221521	1_yellow	sort1a
her4.11	1.4932e-06	0.209306	0.227	0.126	0.0223354	1_yellow	her4.1
tp53i11b	1.94925e-06	0.102524	0.344	0.217	0.0291569	1_yellow	tp53i11b
csrnp1b	2.01448e-06	0.162831	0.33	0.218	0.0301327	1_yellow	csrnp1b
depdc7a	2.16276e-06	0.126413	0.156	0.077	0.0323505	1_yellow	depdc7a
si:dkey-73n10.11	3.15479e-06	0.241907	0.474	0.366	0.0471894	1_yellow	si:dkey-73n10.1
arl4ab	3.17283e-06	0.148798	0.349	0.236	0.0474592	1_yellow	arl4ab
srsf5a	3.32325e-06	0.159641	0.71	0.624	0.0497092	1_yellow	srsf5a
dlc1	3.93374e-06	0.11226	0.239	0.14	0.058841	1_yellow	dlc1
rbp51	6.59891e-06	0.216043	0.355	0.25	0.0987065	1_yellow	rbp5
si:dkeyp-113d7.1	6.64265e-06	0.113821	0.358	0.242	0.0993608	1_yellow	si:dkeyp-113d7.1
ppfibp1b1	6.81271e-06	0.132216	0.29	0.186	0.101905	1_yellow	ppfibp1b
si:dkey-31f5.111	7.40798e-06	0.124348	0.429	0.301	0.110809	1_yellow	si:dkey-31f5.11
si:dkey-23i12.7	7.72537e-06	0.15219	0.236	0.139	0.115556	1_yellow	si:dkey-23i12.7
rgcc1	7.81241e-06	0.274027	0.259	0.163	0.116858	1_yellow	rgcc
col28a2b	8.04864e-06	0.101666	0.122	0.056	0.120392	1_yellow	col28a2b
si:ch211-147a11.3	8.81568e-06	0.115918	0.287	0.183	0.131865	1_yellow	si:ch211-147a11.3
cldn11b	1.17355e-05	0.103057	0.466	0.34	0.175539	1_yellow	cldn11b
bhlhe411	1.46534e-05	0.11927	0.264	0.165	0.219185	1_yellow	bhlhe41
atp1a1a.11	1.71111e-05	0.129315	0.841	0.786	0.255947	1_yellow	atp1a1a.1
insig1	1.96062e-05	0.108174	0.256	0.158	0.29327	1_yellow	insig1
her4.2.11	2.22615e-05	0.173861	0.21	0.124	0.332988	1_yellow	her4.2.1
cyp2x12.11	2.24754e-05	0.103428	0.278	0.176	0.336187	1_yellow	cyp2x12.1
ampd2b1	2.2716e-05	0.110087	0.46	0.339	0.339786	1_yellow	ampd2b
dab2ipb1	2.29516e-05	0.118978	0.486	0.367	0.34331	1_yellow	dab2ipb
nupr1b1	2.32888e-05	0.549643	0.46	0.385	0.348354	1_yellow	nupr1b
hmgn3	2.72817e-05	0.130459	0.435	0.318	0.40808	1_yellow	hmgn3
slc38a41	2.93312e-05	0.138928	0.457	0.342	0.438736	1_yellow	slc38a4
cldn7a1	4.1943e-05	0.196382	0.56	0.46	0.627384	1_yellow	cldn7a
nr4a1	4.34696e-05	0.207578	0.131	0.068	0.650218	1_yellow	nr4a1
ccser2a1	4.43195e-05	0.102773	0.418	0.303	0.662931	1_yellow	ccser2a
zgc:152652	6.39968e-05	0.338652	0.125	0.064	0.957265	1_yellow	zgc:152652
her15.11	6.61706e-05	0.651056	0.139	0.075	0.98978	1_yellow	her15.1
rasd11	6.65646e-05	0.19949	0.185	0.108	0.995673	1_yellow	rasd1
il11ra	7.1581e-05	0.106053	0.386	0.279	1	1_yellow	il11ra
plk2b	7.77851e-05	0.105768	0.213	0.13	1	1_yellow	plk2b
tob1b	8.89167e-05	0.145069	0.642	0.557	1	1_yellow	tob1b
h3f3d1	0.00010164	0.124704	0.784	0.737	1	1_yellow	h3f3d
ubc	0.000149545	0.171128	0.716	0.71	1	1_yellow	ubc
agtr21	0.000150868	0.100422	0.281	0.194	1	1_yellow	agtr2
ppl1	0.00015136	0.106883	0.483	0.36	1	1_yellow	ppl
impdh1b1	0.000177489	0.140802	0.384	0.288	1	1_yellow	impdh1b
ccdc3a	0.000227607	0.10464	0.415	0.312	1	1_yellow	ccdc3a
atp5f1b1	0.000228837	0.147836	0.67	0.633	1	1_yellow	atp5f1b
slc38a5b1	0.000262193	0.158642	0.491	0.413	1	1_yellow	slc38a5b
si:dkey-225k4.11	0.000264884	0.143124	0.278	0.196	1	1_yellow	si:dkey-225k4.1
phactr4a	0.000339824	0.102175	0.366	0.275	1	1_yellow	phactr4a
amotl2b	0.000351024	0.171124	0.347	0.258	1	1_yellow	amotl2b
pik3ip11	0.000389295	0.114755	0.56	0.445	1	1_yellow	pik3ip1
cebpd	0.000395826	0.219416	0.602	0.557	1	1_yellow	cebpd
PLEKHH31	0.00043297	0.105112	0.318	0.23	1	1_yellow	PLEKHH3
bzw1b1	0.000433815	0.249102	0.338	0.274	1	1_yellow	bzw1b
klf11a	0.000443438	0.131991	0.261	0.185	1	1_yellow	klf11a
aldoaa1	0.000448837	0.10645	0.909	0.842	1	1_yellow	aldoaa
slc8a4b1	0.000467279	0.10416	0.401	0.308	1	1_yellow	slc8a4b
foxo1a1	0.000473333	0.156322	0.281	0.201	1	1_yellow	foxo1a
ppp1r15a	0.000503362	0.152882	0.321	0.246	1	1_yellow	ppp1r15a
id1	0.000520906	0.253106	0.574	0.519	1	1_yellow	id1
irf2bpl	0.000540972	0.141844	0.375	0.286	1	1_yellow	irf2bpl
slc35f21	0.000629191	0.11962	0.548	0.443	1	1_yellow	slc35f2
slit21	0.000741733	0.127945	0.543	0.447	1	1_yellow	slit2
greb11	0.000975278	0.136178	0.409	0.324	1	1_yellow	greb1
si:ch73-335l21.4	0.00112617	0.136927	0.568	0.467	1	1_yellow	si:ch73-335l21.4
hpgd1	0.00121522	0.120457	0.205	0.139	1	1_yellow	hpgd
prps1a1	0.00124356	0.142733	0.352	0.282	1	1_yellow	prps1a
atrx1	0.00129868	0.123028	0.682	0.638	1	1_yellow	atrx
irf1b	0.00136909	0.151511	0.284	0.21	1	1_yellow	irf1b
pnrc2	0.00136913	0.112082	0.864	0.837	1	1_yellow	pnrc2
odc11	0.00169583	0.135595	0.324	0.252	1	1_yellow	odc1
her4.31	0.002085	0.101196	0.085	0.045	1	1_yellow	her4.3
zgc:171750	0.00233508	0.148229	0.097	0.054	1	1_yellow	zgc:171750
smad21	0.00248472	0.132833	0.352	0.283	1	1_yellow	smad2
histh1l	0.002755	0.28163	0.528	0.479	1	1_yellow	histh1l
timp2b	0.00285761	0.131256	0.364	0.297	1	1_yellow	timp2b
hnrnpa0b1	0.00318407	0.130692	0.452	0.391	1	1_yellow	hnrnpa0b
slc38a2	0.00371262	0.143165	0.452	0.39	1	1_yellow	slc38a2
p4ha1b1	0.00422489	0.109991	0.17	0.115	1	1_yellow	p4ha1b
foxp41	0.00456871	0.169632	0.435	0.378	1	1_yellow	foxp4
tubb4b	0.00469053	0.131152	0.648	0.61	1	1_yellow	tubb4b
clic2	0.0047981	0.130955	0.125	0.08	1	1_yellow	clic2
hspb111	0.00487942	0.244815	0.068	0.035	1	1_yellow	hspb11
BX284696.11	0.0052204	0.177454	0.327	0.261	1	1_yellow	BX284696.1
ncl1	0.00553703	0.161986	0.48	0.451	1	1_yellow	ncl
npm1a1	0.00577969	0.131231	0.304	0.242	1	1_yellow	npm1a
arf5	0.0057951	0.123627	0.264	0.211	1	1_yellow	arf5
dusp5	0.00599077	0.18648	0.097	0.059	1	1_yellow	dusp5
atp5f1e1	0.00617754	0.136367	0.466	0.418	1	1_yellow	atp5f1e
slc25a25a	0.00702021	0.153663	0.148	0.104	1	1_yellow	slc25a25a
COLEC101	0.00781627	0.121455	0.418	0.358	1	1_yellow	COLEC10
sult6b1	0.00845413	0.126714	0.21	0.158	1	1_yellow	sult6b1
sept9a1	0.00931047	0.117285	0.474	0.416	1	1_yellow	sept9a

## Sheet: SC1 (green)
	p_val	avg_logFC	pct.1	pct.2	p_val_adj	cluster	gene
marcksl1a	1.4605e-61	0.614018	1	0.886	2.18462e-57	1_green	marcksl1a
pdgfra1	1.97035e-52	0.592417	0.979	0.747	2.94725e-48	1_green	pdgfra
itm2bb	1.50309e-47	0.450734	1	0.945	2.24832e-43	1_green	itm2bb
fxyd6l	4.47835e-44	0.609327	0.951	0.76	6.69872e-40	1_green	fxyd6l
dap1b2	1.87791e-41	0.501823	0.994	0.872	2.80897e-37	1_green	dap1b
sparc	2.50854e-41	0.421353	1	0.995	3.75228e-37	1_green	sparc
ivns1abpa2	6.44522e-41	0.457323	1	0.865	9.64076e-37	1_green	ivns1abpa
SERP11	3.22671e-36	0.387755	1	0.976	4.82651e-32	1_green	SERP1
marcksl1b	8.84541e-36	0.494445	0.991	0.882	1.3231e-31	1_green	marcksl1b
mt-co11	9.11939e-36	0.227017	1	1	1.36408e-31	1_green	mt-co1
cxcl14	9.55608e-34	0.631379	0.783	0.553	1.4294e-29	1_green	cxcl14
aldoaa2	1.84943e-33	0.375294	0.979	0.827	2.76637e-29	1_green	aldoaa
cd74b	2.49436e-33	0.434202	0.994	0.933	3.73107e-29	1_green	cd74b
psap	1.3013e-32	0.460292	0.887	0.755	1.94648e-28	1_green	psap
htra1b	6.88243e-31	0.504122	0.829	0.569	1.02947e-26	1_green	htra1b
alcama	1.98202e-29	0.319689	0.997	0.98	2.9647e-25	1_green	alcama
notch32	2.85844e-29	0.381216	0.994	0.799	4.27565e-25	1_green	notch3
akap12b	7.21427e-29	0.469813	0.899	0.695	1.07911e-24	1_green	akap12b
oaz1a2	2.02846e-28	0.40199	0.976	0.917	3.03417e-24	1_green	oaz1a
selenop1	2.70332e-28	0.366878	0.966	0.885	4.04362e-24	1_green	selenop
hsd17b12	2.63972e-27	0.43864	0.887	0.663	3.94849e-23	1_green	hsd17b1
ponzr11	4.51598e-27	0.307445	0.997	0.966	6.755e-23	1_green	ponzr1
cad1	4.63272e-27	0.478231	0.801	0.602	6.92963e-23	1_green	cad
cd74a	1.05639e-26	0.367829	0.997	0.916	1.58015e-22	1_green	cd74a
rerglb	1.86906e-26	0.412457	0.679	0.386	2.79574e-22	1_green	rerglb
ifi30	9.7321e-24	0.405909	0.893	0.693	1.45573e-19	1_green	ifi30
atp5mc3b2	2.06282e-23	0.332497	0.936	0.878	3.08556e-19	1_green	atp5mc3b
cdh12	7.96921e-23	0.378359	0.908	0.748	1.19204e-18	1_green	cdh1
agrn	7.38649e-22	0.353672	0.872	0.778	1.10487e-17	1_green	agrn
gmps2	8.83584e-21	0.347306	0.856	0.683	1.32167e-16	1_green	gmps
tp53inp1	1.61865e-20	0.460078	0.703	0.478	2.42118e-16	1_green	tp53inp1
plekhg41	9.33441e-19	0.412229	0.612	0.407	1.39624e-14	1_green	plekhg4
mt-co21	1.15614e-18	0.143288	1	0.999	1.72936e-14	1_green	mt-co2
col4a51	1.93099e-18	0.364303	0.865	0.701	2.88837e-14	1_green	col4a5
mt-cyb1	3.72167e-18	0.169378	1	0.995	5.56687e-14	1_green	mt-cyb
pkma1	4.2482e-18	0.360086	0.752	0.626	6.35446e-14	1_green	pkma
gsdf	9.05259e-18	0.315124	1	0.949	1.35409e-13	1_green	gsdf
ackr4b1	4.49636e-17	0.371256	0.657	0.472	6.72566e-13	1_green	ackr4b
col4a61	6.97874e-17	0.357394	0.777	0.675	1.04388e-12	1_green	col4a6
gstt1b1	1.94216e-16	0.326633	0.893	0.776	2.90508e-12	1_green	gstt1b
hspe11	3.97515e-16	0.350208	0.795	0.663	5.94602e-12	1_green	hspe1
slc25a52	4.78262e-16	0.206452	1	0.997	7.15385e-12	1_green	slc25a5
ramp2	1.14893e-15	0.365279	0.498	0.287	1.71858e-11	1_green	ramp2
CU861453.1	3.10719e-15	0.265728	0.339	0.158	4.64774e-11	1_green	CU861453.1
srpra2	4.81946e-15	0.309618	0.801	0.661	7.20895e-11	1_green	srpra
glulb2	2.32838e-14	0.283803	1	0.855	3.4828e-10	1_green	glulb
lama5	2.74146e-14	0.346093	0.774	0.691	4.10068e-10	1_green	lama5
pik3ip12	9.35549e-14	0.428888	0.59	0.44	1.39939e-09	1_green	pik3ip1
bmpr2a	1.09765e-13	0.283575	0.841	0.706	1.64187e-09	1_green	bmpr2a
mbnl3	1.55817e-13	0.347449	0.685	0.575	2.33071e-09	1_green	mbnl3
plpp1a	2.77307e-13	0.33739	0.547	0.355	4.14796e-09	1_green	plpp1a
nrp2a1	2.97099e-13	0.264908	0.657	0.481	4.44401e-09	1_green	nrp2a
slc35f22	1.19965e-12	0.396399	0.596	0.434	1.79444e-08	1_green	slc35f2
htra1a	1.54008e-12	0.281232	0.664	0.49	2.30365e-08	1_green	htra1a
mhc2b	1.85322e-12	0.285759	0.566	0.374	2.77204e-08	1_green	mhc2b
cygb11	3.16112e-12	0.331106	0.459	0.289	4.72841e-08	1_green	cygb1
bambia1	4.45743e-12	0.347672	0.703	0.57	6.66742e-08	1_green	bambia
itga9	5.11706e-12	0.265943	0.495	0.32	7.65409e-08	1_green	itga9
zgc:1748631	5.8803e-12	0.261292	0.902	0.81	8.79575e-08	1_green	zgc:174863
lamb2l	7.01496e-12	0.276816	0.612	0.434	1.0493e-07	1_green	lamb2l
krt18a.1	9.76875e-12	0.209162	0.988	0.969	1.46121e-07	1_green	krt18a.1
myh10	1.05306e-11	0.267546	0.523	0.348	1.57516e-07	1_green	myh10
tent5ba	2.21485e-11	0.329642	0.492	0.312	3.31298e-07	1_green	tent5ba
rtn4a	4.65015e-11	0.349245	0.627	0.546	6.9557e-07	1_green	rtn4a
cd81a	4.67645e-11	0.268755	0.795	0.753	6.99503e-07	1_green	cd81a
appa2	4.70138e-11	0.250135	0.905	0.795	7.03232e-07	1_green	appa
gapdhs1	1.235e-10	0.234835	0.826	0.758	1.84731e-06	1_green	gapdhs
zgc:92275	1.51086e-10	0.294508	0.453	0.296	2.25994e-06	1_green	zgc:92275
smoc2	1.63789e-10	0.248098	0.786	0.674	2.44995e-06	1_green	smoc2
ppl2	2.28166e-10	0.291797	0.514	0.356	3.41291e-06	1_green	ppl
ecm1b2	2.69591e-10	0.240262	0.954	0.845	4.03255e-06	1_green	ecm1b
gabarapb	2.97129e-10	0.209215	0.844	0.811	4.44446e-06	1_green	gabarapb
si:dkey-97a13.6	3.14989e-10	0.213472	0.443	0.275	4.71161e-06	1_green	si:dkey-97a13.6
rps121	3.39816e-10	0.126417	1	0.999	5.08296e-06	1_green	rps12
cd164	5.07396e-10	0.28666	0.468	0.315	7.58963e-06	1_green	cd164
metrn1	5.31328e-10	0.335795	0.56	0.455	7.9476e-06	1_green	metrn
gstm.1	9.44474e-10	0.322977	0.648	0.603	1.41274e-05	1_green	gstm.1
CABZ01068358.1	1.25791e-09	0.264547	0.74	0.659	1.88157e-05	1_green	CABZ01068358.1
hey21	1.25915e-09	0.248675	0.621	0.485	1.88343e-05	1_green	hey2
slc7a10a1	1.6816e-09	0.370429	0.52	0.402	2.51534e-05	1_green	slc7a10a
CABZ01068367.1	2.94603e-09	0.197825	0.538	0.371	4.40667e-05	1_green	CABZ01068367.1
col12a1a	3.19444e-09	0.198789	0.257	0.13	4.77824e-05	1_green	col12a1a
rps13	3.27e-09	0.10615	1	0.998	4.89126e-05	1_green	rps13
rps3a1	3.48252e-09	0.111928	1	0.998	5.20916e-05	1_green	rps3a
rpl191	4.96508e-09	0.107141	1	0.999	7.42676e-05	1_green	rpl19
si:ch73-1a9.3	6.12323e-09	0.163716	0.899	0.873	9.15913e-05	1_green	si:ch73-1a9.3
pgm22	7.24274e-09	0.253903	0.514	0.362	0.000108337	1_green	pgm2
znf536	7.34661e-09	0.22127	0.676	0.521	0.000109891	1_green	znf536
ptprfb2	7.36301e-09	0.264148	0.602	0.477	0.000110136	1_green	ptprfb
cldn11a2	8.12776e-09	0.163813	0.994	0.956	0.000121575	1_green	cldn11a
rps51	8.51094e-09	0.112333	1	0.997	0.000127307	1_green	rps5
rack11	9.81844e-09	0.139545	0.994	0.986	0.000146864	1_green	rack1
dock9b	1.03939e-08	0.198189	0.477	0.317	0.000155473	1_green	dock9b
si:busm1-57f23.11	1.34427e-08	0.311674	0.364	0.218	0.000201076	1_green	si:busm1-57f23.1
rpl18	1.91604e-08	0.115527	1	0.995	0.000286602	1_green	rpl18
ktn1	2.91226e-08	0.186838	0.453	0.303	0.000435616	1_green	ktn1
cldn11b1	3.37362e-08	0.189617	0.489	0.337	0.000504626	1_green	cldn11b
oaz1b2	3.4e-08	0.197831	0.865	0.802	0.000508573	1_green	oaz1b
si:dkey-7j14.6	3.43627e-08	0.183894	0.795	0.773	0.000513998	1_green	si:dkey-7j14.6
si:ch211-240l19.51	3.46732e-08	0.221376	0.413	0.266	0.000518642	1_green	si:ch211-240l19.5
rpl81	3.97984e-08	0.11558	1	0.997	0.000595304	1_green	rpl8
rpl71	4.17204e-08	0.10975	0.997	0.998	0.000624053	1_green	rpl7
faua1	4.19157e-08	0.118867	0.997	0.988	0.000626975	1_green	faua
rpl27	4.67644e-08	0.11163	0.997	0.994	0.000699502	1_green	rpl27
zgc:1948391	5.00517e-08	0.13983	0.318	0.186	0.000748674	1_green	zgc:194839
enpp6	5.09707e-08	0.188549	0.422	0.281	0.000762419	1_green	enpp6
col16a1	5.11627e-08	0.148033	0.336	0.2	0.000765291	1_green	col16a1
slit22	6.87393e-08	0.203984	0.596	0.437	0.0010282	1_green	slit2
foxl2a	6.94065e-08	0.225129	0.48	0.35	0.00103818	1_green	foxl2a
gas6	7.75299e-08	0.310141	0.523	0.421	0.00115969	1_green	gas6
antxr1c1	9.30911e-08	0.299986	0.502	0.409	0.00139246	1_green	antxr1c
ccdc3a1	1.21032e-07	0.188788	0.446	0.307	0.0018104	1_green	ccdc3a
rps31	1.27171e-07	0.135064	0.991	0.982	0.00190222	1_green	rps3
cfl2	1.29506e-07	0.181872	0.502	0.364	0.00193715	1_green	cfl2
kidins220a2	1.84263e-07	0.211355	0.495	0.347	0.0027562	1_green	kidins220a
atrx2	1.93841e-07	0.238176	0.682	0.639	0.00289948	1_green	atrx
slit3	2.58465e-07	0.175676	0.416	0.285	0.00386612	1_green	slit3
lnx2a	2.93536e-07	0.15062	0.281	0.166	0.00439071	1_green	lnx2a
plekha6	3.01327e-07	0.19637	0.52	0.382	0.00450725	1_green	plekha6
rplp11	3.46525e-07	0.109077	1	0.998	0.00518332	1_green	rplp1
ndufa4l1	3.64717e-07	0.185865	0.789	0.784	0.00545544	1_green	ndufa4l
amh	6.56525e-07	0.299765	0.498	0.386	0.0098203	1_green	amh
rps15a	7.41932e-07	0.105813	1	0.999	0.0110978	1_green	rps15a
PDE3B	1.11454e-06	0.167939	0.401	0.28	0.0166714	1_green	PDE3B
fam120a1	1.12133e-06	0.223127	0.517	0.397	0.0167729	1_green	fam120a
arl8ba	1.23733e-06	0.138408	0.333	0.212	0.018508	1_green	arl8ba
slc25a26	1.23765e-06	0.115178	0.284	0.17	0.0185128	1_green	slc25a26
wu:fj16a03	1.29764e-06	0.208109	0.407	0.28	0.0194102	1_green	wu:fj16a03
tmsb1	1.65546e-06	0.167607	0.838	0.777	0.0247624	1_green	tmsb1
pdlim2	2.18814e-06	0.180633	0.272	0.165	0.0327301	1_green	pdlim2
cox4i11	2.43021e-06	0.189697	0.725	0.736	0.0363511	1_green	cox4i1
kank4	2.51103e-06	0.168235	0.404	0.283	0.0375599	1_green	kank4
mt-atp61	2.78269e-06	0.137859	0.988	0.979	0.0416235	1_green	mt-atp6
dag11	3.39179e-06	0.170091	0.823	0.748	0.0507344	1_green	dag1
mmp14a	3.70314e-06	0.155165	0.352	0.237	0.0553915	1_green	mmp14a
atp1a1a.12	3.95917e-06	0.198508	0.817	0.793	0.0592213	1_green	atp1a1a.1
si:dkey-31f5.112	4.84491e-06	0.142286	0.428	0.303	0.0724702	1_green	si:dkey-31f5.11
aif1l	4.91111e-06	0.241627	0.581	0.53	0.0734604	1_green	aif1l
cldn7a2	5.44572e-06	0.262115	0.554	0.463	0.0814571	1_green	cldn7a
si:busm1-266f07.2	6.73402e-06	0.253154	0.538	0.432	0.100727	1_green	si:busm1-266f07.2
grna	7.1575e-06	0.169025	0.407	0.291	0.107062	1_green	grna
rftn2	9.68083e-06	0.150788	0.388	0.274	0.144806	1_green	rftn2
itm2ba	1.02634e-05	0.175074	0.777	0.782	0.15352	1_green	itm2ba
wu:fc75a09	1.02731e-05	0.212097	0.407	0.309	0.153665	1_green	wu:fc75a09
nid1a	1.06616e-05	0.136343	0.251	0.153	0.159476	1_green	nid1a
ogdha	1.06617e-05	0.132003	0.297	0.192	0.159478	1_green	ogdha
pyroxd2	1.12131e-05	0.117443	0.346	0.229	0.167726	1_green	pyroxd2
eif4ebp3l1	1.26427e-05	0.25224	0.443	0.361	0.189109	1_green	eif4ebp3l
gpt2l	1.28193e-05	0.133944	0.257	0.161	0.191752	1_green	gpt2l
zgc:103700	1.32644e-05	0.195492	0.612	0.527	0.198409	1_green	zgc:103700
hipk3a	1.39974e-05	0.125205	0.373	0.262	0.209374	1_green	hipk3a
lamc1	1.66643e-05	0.1015	0.226	0.134	0.249265	1_green	lamc1
enc1	1.83495e-05	0.211499	0.523	0.446	0.274472	1_green	enc1
rpl35a	2.87559e-05	0.103105	0.994	0.992	0.430131	1_green	rpl35a
slc38a42	4.69242e-05	0.162441	0.456	0.345	0.701893	1_green	slc38a4
si:ch211-250c4.4	5.95608e-05	0.157857	0.459	0.365	0.890911	1_green	si:ch211-250c4.4
fuca2	6.891e-05	0.134661	0.242	0.156	1	1_green	fuca2
slc25a3b1	7.09914e-05	0.186882	0.648	0.646	1	1_green	slc25a3b
spcs2	7.11755e-05	0.133159	0.309	0.213	1	1_green	spcs2
si:ch73-158p21.3	7.19573e-05	0.126306	0.367	0.264	1	1_green	si:ch73-158p21.3
robo1	7.35841e-05	0.145315	0.443	0.35	1	1_green	robo1
znf609b	8.26713e-05	0.154574	0.517	0.428	1	1_green	znf609b
atp5fa12	8.41291e-05	0.172121	0.67	0.642	1	1_green	atp5fa1
edem1	8.88725e-05	0.165393	0.379	0.283	1	1_green	edem1
aqp12	9.44279e-05	0.131035	0.333	0.234	1	1_green	aqp12
rapgef2	9.53524e-05	0.151377	0.373	0.275	1	1_green	rapgef2
foxo3b	9.64154e-05	0.104662	0.281	0.188	1	1_green	foxo3b
pam	0.000118009	0.154384	0.373	0.28	1	1_green	pam
il11ra1	0.000128006	0.11198	0.382	0.282	1	1_green	il11ra
ampd2b2	0.000128149	0.141388	0.446	0.344	1	1_green	ampd2b
gmpr21	0.000153991	0.20601	0.391	0.312	1	1_green	gmpr2
slc38a3b1	0.000234972	0.113067	0.284	0.196	1	1_green	slc38a3b
myl9a1	0.00026082	0.14895	0.725	0.71	1	1_green	myl9a
msna	0.000262417	0.177417	0.691	0.691	1	1_green	msna
timp2b1	0.000274103	0.106164	0.394	0.291	1	1_green	timp2b
sec62	0.000284103	0.106906	0.324	0.235	1	1_green	sec62
slc43a3b	0.000290173	0.204749	0.526	0.494	1	1_green	slc43a3b
nos1apa.1	0.000304973	0.145356	0.434	0.341	1	1_green	nos1apa.1
slc27a1a	0.000331125	0.138156	0.315	0.23	1	1_green	slc27a1a
rhebl1	0.000371994	0.111068	0.208	0.135	1	1_green	rhebl1
naprt1	0.000385466	0.111364	0.361	0.27	1	1_green	naprt
si:dkey-74k8.3	0.000401131	0.112796	0.318	0.229	1	1_green	si:dkey-74k8.3
si:busm1-194e12.11	0.000414831	0.141559	0.486	0.388	1	1_green	si:busm1-194e12.11
fam13b	0.000503994	0.109196	0.321	0.237	1	1_green	fam13b
ppp1cb	0.000514112	0.208881	0.428	0.381	1	1_green	ppp1cb
tln1	0.000574807	0.184135	0.453	0.4	1	1_green	tln1
cnbpa1	0.00059851	0.190338	0.416	0.359	1	1_green	cnbpa
bckdk1	0.000603953	0.191621	0.269	0.201	1	1_green	bckdk
ccser2a2	0.000610103	0.110657	0.401	0.309	1	1_green	ccser2a
lgals3b	0.000646357	0.23477	0.468	0.45	1	1_green	lgals3b
lpar1	0.000666142	0.104139	0.281	0.201	1	1_green	lpar1
rhoq	0.00073138	0.134513	0.367	0.285	1	1_green	rhoq
fam120c	0.000773063	0.1896	0.422	0.364	1	1_green	fam120c
mt-nd11	0.000810026	0.147872	0.786	0.788	1	1_green	mt-nd1
svild	0.000818282	0.178735	0.364	0.298	1	1_green	svild
jcada	0.000822397	0.142136	0.388	0.311	1	1_green	jcada
lygl1	0.000831747	0.120301	0.196	0.131	1	1_green	lygl1
COLEC102	0.000917179	0.175505	0.431	0.356	1	1_green	COLEC10
sema3ab	0.000924209	0.102455	0.266	0.189	1	1_green	sema3ab
calua	0.000930477	0.127199	0.37	0.283	1	1_green	calua
notch1b1	0.00101874	0.125048	0.382	0.298	1	1_green	notch1b
ano5b1	0.00117212	0.128229	0.385	0.295	1	1_green	ano5b
tcf3b	0.00129693	0.110297	0.346	0.269	1	1_green	tcf3b
zgc:162698	0.00137968	0.100207	0.202	0.137	1	1_green	zgc:162698
hmgn31	0.00138331	0.134103	0.41	0.326	1	1_green	hmgn3
mkrn1	0.00144093	0.129419	0.339	0.263	1	1_green	mkrn1
slc38a5b2	0.00151566	0.158954	0.468	0.419	1	1_green	slc38a5b
ctsa	0.00177515	0.185259	0.358	0.308	1	1_green	ctsa
tspan4a	0.00244687	0.149888	0.358	0.29	1	1_green	tspan4a
sult1st6	0.00250369	0.12128	0.251	0.184	1	1_green	sult1st6
eif4ebp31	0.00264906	0.19936	0.312	0.258	1	1_green	eif4ebp3
cx43	0.00269226	0.214371	0.407	0.355	1	1_green	cx43
ptp4a2b2	0.00279572	0.190339	0.41	0.366	1	1_green	ptp4a2b
CR792441.1	0.00283985	0.183184	0.061	0.029	1	1_green	CR792441.1
mrpl361	0.00305648	0.156298	0.214	0.157	1	1_green	mrpl36
cnn3a	0.00312146	0.162009	0.208	0.152	1	1_green	cnn3a
ppib	0.00318388	0.115852	0.722	0.736	1	1_green	ppib
nop10	0.00343313	0.203941	0.226	0.175	1	1_green	nop10
selenof	0.00346473	0.181381	0.517	0.528	1	1_green	selenof
cnbpb	0.00363898	0.191774	0.492	0.507	1	1_green	cnbpb
vegfaa1	0.00385527	0.125767	0.434	0.359	1	1_green	vegfaa
rps6ka1	0.00395509	0.127721	0.284	0.222	1	1_green	rps6ka1
crtap	0.00448109	0.104165	0.373	0.305	1	1_green	crtap
atp1b3b	0.00505891	0.19442	0.33	0.285	1	1_green	atp1b3b
bmp4	0.00509441	0.106585	0.269	0.207	1	1_green	bmp4
atp5f1b2	0.00564839	0.156787	0.633	0.642	1	1_green	atp5f1b
selenow1	0.00592562	0.130445	0.578	0.587	1	1_green	selenow1
capn2a	0.0060175	0.115569	0.385	0.319	1	1_green	capn2a
tmem176l.1	0.00626592	0.169091	0.587	0.621	1	1_green	tmem176l.1
map7d1a	0.00656106	0.101249	0.33	0.265	1	1_green	map7d1a
sept9a2	0.0068899	0.180083	0.45	0.423	1	1_green	sept9a
atp5pb1	0.00785332	0.159152	0.529	0.536	1	1_green	atp5pb
vdac21	0.00786085	0.160146	0.514	0.518	1	1_green	vdac2
aldh1a21	0.00820746	0.14363	0.615	0.626	1	1_green	aldh1a2
adamts2	0.00869412	0.12397	0.385	0.328	1	1_green	adamts2
atp5if1b1	0.00869804	0.167103	0.388	0.362	1	1_green	atp5if1b
cbx3a	0.00908851	0.171575	0.364	0.327	1	1_green	cbx3a
ndrg3b	0.00944098	0.1334	0.18	0.133	1	1_green	ndrg3b
h3f3b.1.11	0.00954649	0.107908	0.679	0.7	1	1_green	h3f3b.1.1

## Sheet: SC1 (teal)
	p_val	avg_logFC	pct.1	pct.2	p_val_adj	cluster	gene
sparc1	1.73125e-69	0.584625	1	0.995	2.5896e-65	1_teal	sparc
cd74b1	3.36307e-64	0.598582	1	0.933	5.03049e-60	1_teal	cd74b
cd74a1	1.58882e-59	0.558666	0.997	0.918	2.37656e-55	1_teal	cd74a
gsdf1	6.90917e-54	0.665817	0.997	0.951	1.03347e-49	1_teal	gsdf
marcksl1a1	8.1233e-53	0.536206	1	0.888	1.21508e-48	1_teal	marcksl1a
itm2bb1	1.70296e-45	0.440318	1	0.946	2.54729e-41	1_teal	itm2bb
ifi301	1.89606e-45	0.627049	0.937	0.687	2.83613e-41	1_teal	ifi30
tent5ba1	1.91031e-34	0.484285	0.631	0.287	2.85743e-30	1_teal	tent5ba
akap12b1	3.43773e-33	0.485363	0.91	0.696	5.14215e-29	1_teal	akap12b
htra1a1	7.92782e-29	0.392436	0.777	0.47	1.18584e-24	1_teal	htra1a
plpp1a1	2.34841e-28	0.523999	0.635	0.341	3.51275e-24	1_teal	plpp1a
gas61	8.24072e-28	0.479311	0.674	0.392	1.23265e-23	1_teal	gas6
marcksl1b1	1.3156e-26	0.450597	0.98	0.886	1.96788e-22	1_teal	marcksl1b
fxyd6l1	9.35796e-24	0.446319	0.934	0.767	1.39976e-19	1_teal	fxyd6l
hsp70.21	8.094e-23	0.400506	0.973	0.904	1.2107e-18	1_teal	hsp70.2
hsp70.11	1.26474e-21	0.398611	0.96	0.891	1.8918e-17	1_teal	hsp70.1
pros1	8.5523e-21	0.360596	0.339	0.13	1.27925e-16	1_teal	pros1
rerglb1	3.45351e-20	0.320134	0.671	0.393	5.16576e-16	1_teal	rerglb
tp53inp11	3.64367e-20	0.418247	0.728	0.477	5.4502e-16	1_teal	tp53inp1
krt18a.11	1.2542e-19	0.272772	0.99	0.969	1.87604e-15	1_teal	krt18a.1
znf609b1	2.58033e-19	0.308008	0.654	0.402	3.85966e-15	1_teal	znf609b
ivns1abpa3	2.17425e-18	0.302414	0.99	0.869	3.25224e-14	1_teal	ivns1abpa
robo3	5.94916e-18	0.167533	0.223	0.066	8.89876e-14	1_teal	robo3
cxcl141	6.92118e-18	0.393604	0.771	0.559	1.03527e-13	1_teal	cxcl14
htra1b1	8.91367e-18	0.337201	0.811	0.577	1.33331e-13	1_teal	htra1b
clu	1.23245e-17	0.254101	0.329	0.131	1.8435e-13	1_teal	clu
psap1	1.99483e-17	0.299948	0.884	0.758	2.98386e-13	1_teal	psap
ccbe1	3.48819e-17	0.243919	0.352	0.153	5.21763e-13	1_teal	ccbe1
alcama1	4.55992e-17	0.233486	1	0.98	6.82073e-13	1_teal	alcama
aldoaa3	8.7541e-17	0.306021	0.957	0.834	1.30944e-12	1_teal	aldoaa
slit31	1.10283e-16	0.233981	0.515	0.267	1.64961e-12	1_teal	slit3
hey22	7.70536e-16	0.347827	0.708	0.47	1.15257e-11	1_teal	hey2
id32	1.86999e-15	0.428919	0.668	0.451	2.79713e-11	1_teal	id3
ecrg4a	8.142e-15	0.325511	0.425	0.216	1.21788e-10	1_teal	ecrg4a
amotl2b1	9.95134e-15	0.512169	0.429	0.244	1.48852e-10	1_teal	amotl2b
grna1	1.41765e-14	0.241456	0.495	0.275	2.12052e-10	1_teal	grna
UBB1	1.85699e-14	0.457227	0.718	0.559	2.77769e-10	1_teal	UBB
hsp70.31	2.23952e-14	0.336839	0.95	0.876	3.34987e-10	1_teal	hsp70.3
cfl21	2.80476e-14	0.259211	0.565	0.354	4.19536e-10	1_teal	cfl2
pdgfra2	5.81071e-14	0.269382	0.953	0.756	8.69166e-10	1_teal	pdgfra
mhc2b1	3.2432e-13	0.301799	0.591	0.372	4.85117e-09	1_teal	mhc2b
si:busm1-194e12.111	5.53425e-13	0.21897	0.601	0.367	8.27813e-09	1_teal	si:busm1-194e12.11
znf5361	7.39996e-13	0.259869	0.724	0.514	1.10689e-08	1_teal	znf536
lamb2l1	9.63968e-13	0.232927	0.631	0.434	1.4419e-08	1_teal	lamb2l
hspe12	3.4693e-12	0.30668	0.791	0.667	5.18937e-08	1_teal	hspe1
phlda22	3.64492e-12	0.295598	0.93	0.796	5.45207e-08	1_teal	phlda2
zgc:922751	3.99385e-12	0.248256	0.495	0.291	5.974e-08	1_teal	zgc:92275
pkma2	1.69639e-11	0.25905	0.791	0.621	2.53746e-07	1_teal	pkma
foxl2a1	2.10946e-11	0.221748	0.525	0.343	3.15534e-07	1_teal	foxl2a
hsp70l1	2.44437e-11	0.398019	0.794	0.648	3.65629e-07	1_teal	hsp70l
wnt4a2	3.08438e-11	0.275603	0.601	0.414	4.61362e-07	1_teal	wnt4a
gstt1b2	6.43287e-11	0.234556	0.904	0.776	9.62229e-07	1_teal	gstt1b
socs3a1	6.86688e-11	0.250221	0.983	0.919	1.02715e-06	1_teal	socs3a
nrg2a	8.73158e-11	0.178119	0.319	0.164	1.30607e-06	1_teal	nrg2a
gmnn2	8.96757e-11	0.31903	0.701	0.55	1.34137e-06	1_teal	gmnn
CABZ01068358.11	9.44981e-11	0.250395	0.804	0.648	1.4135e-06	1_teal	CABZ01068358.1
col4a62	9.75822e-11	0.234762	0.824	0.667	1.45964e-06	1_teal	col4a6
bambia2	1.18535e-10	0.292297	0.734	0.566	1.77304e-06	1_teal	bambia
col4a52	2.75526e-10	0.234708	0.831	0.711	4.12132e-06	1_teal	col4a5
tcf3b1	2.87075e-10	0.187485	0.425	0.254	4.29407e-06	1_teal	tcf3b
klf6a1	2.97513e-10	0.278598	0.907	0.818	4.4502e-06	1_teal	klf6a
lama51	4.34453e-10	0.259194	0.761	0.695	6.49855e-06	1_teal	lama5
cnnm2b	5.03135e-10	0.141625	0.282	0.135	7.52589e-06	1_teal	cnnm2b
oaz1a3	5.04228e-10	0.234503	0.973	0.919	7.54224e-06	1_teal	oaz1a
ptgs2a	5.48579e-10	0.288968	0.365	0.205	8.20564e-06	1_teal	ptgs2a
si:busm1-266f07.21	5.63312e-10	0.422123	0.581	0.426	8.42602e-06	1_teal	si:busm1-266f07.2
slc4a2a	7.30944e-10	0.152567	0.312	0.162	1.09335e-05	1_teal	slc4a2a
vegfaa2	8.2531e-10	0.197486	0.518	0.343	1.2345e-05	1_teal	vegfaa
ctsba	8.25541e-10	0.394873	0.379	0.231	1.23484e-05	1_teal	ctsba
si:dkey-73n10.12	8.94869e-10	0.284739	0.525	0.359	1.33855e-05	1_teal	si:dkey-73n10.1
fkbp1b	1.15643e-09	0.189347	0.635	0.445	1.72979e-05	1_teal	fkbp1b
si:ch73-1a9.31	1.17395e-09	0.168276	0.924	0.868	1.75599e-05	1_teal	si:ch73-1a9.3
rhoq1	1.57586e-09	0.165524	0.445	0.271	2.35717e-05	1_teal	rhoq
eif4ebp3l2	1.92747e-09	0.262559	0.518	0.347	2.88311e-05	1_teal	eif4ebp3l
slc38a21	2.06548e-09	0.27273	0.528	0.377	3.08955e-05	1_teal	slc38a2
nccrp1	2.49585e-09	0.366528	0.422	0.279	3.73329e-05	1_teal	nccrp1
cebpb1	2.51317e-09	0.352488	0.678	0.529	3.7592e-05	1_teal	cebpb
si:ch73-158p21.31	2.59334e-09	0.189432	0.422	0.255	3.87912e-05	1_teal	si:ch73-158p21.3
junba1	2.63976e-09	0.214518	0.967	0.873	3.94856e-05	1_teal	junba
gadd45ba1	3.89683e-09	0.205214	0.944	0.866	5.82888e-05	1_teal	gadd45ba
slc7a10a2	4.66004e-09	0.224192	0.581	0.392	6.97049e-05	1_teal	slc7a10a
chka	4.86358e-09	0.244016	0.771	0.663	7.27494e-05	1_teal	chka
dpp7	5.17802e-09	0.176121	0.458	0.291	7.74528e-05	1_teal	dpp7
zgc:1037001	7.23409e-09	0.287595	0.664	0.518	0.000108207	1_teal	zgc:103700
pim11	8.29184e-09	0.295519	0.744	0.623	0.000124029	1_teal	pim1
sb:cb811	9.16346e-09	0.243789	0.518	0.348	0.000137067	1_teal	sb:cb81
foxo3b1	9.52153e-09	0.148275	0.326	0.181	0.000142423	1_teal	foxo3b
amotl2a	9.9276e-09	0.289342	0.415	0.275	0.000148497	1_teal	amotl2a
ptn	1.11456e-08	0.176704	0.246	0.123	0.000166716	1_teal	ptn
nrp2a2	1.17797e-08	0.172733	0.664	0.483	0.000176201	1_teal	nrp2a
ackr4b2	1.29053e-08	0.24442	0.645	0.478	0.000193037	1_teal	ackr4b
enpp61	1.59658e-08	0.167022	0.445	0.279	0.000238816	1_teal	enpp6
c7a	1.64842e-08	0.134723	0.186	0.081	0.00024657	1_teal	c7a
pabpc1b	1.91053e-08	0.257134	0.565	0.427	0.000285776	1_teal	pabpc1b
aqp121	2.04268e-08	0.180498	0.375	0.227	0.000305544	1_teal	aqp12
plekha61	2.04434e-08	0.188169	0.535	0.381	0.000305792	1_teal	plekha6
bag31	2.20877e-08	0.231505	0.279	0.15	0.000330387	1_teal	bag3
cd81a1	2.48913e-08	0.205944	0.807	0.752	0.000372323	1_teal	cd81a
asph	2.61357e-08	0.121031	0.276	0.144	0.000390938	1_teal	asph
CABZ01049847.1	3.59678e-08	0.115227	0.15	0.059	0.000538007	1_teal	CABZ01049847.1
atp1b1a	3.77528e-08	0.168847	0.997	0.982	0.000564707	1_teal	atp1b1a
emilin2b	3.78797e-08	0.134458	0.233	0.114	0.000566604	1_teal	emilin2b
sync	5.26061e-08	0.101201	0.233	0.114	0.000786883	1_teal	sync
myh101	1.00757e-07	0.206571	0.502	0.355	0.00150712	1_teal	myh10
si:dkeyp-72g9.4	2.02447e-07	0.125594	0.209	0.104	0.0030282	1_teal	si:dkeyp-72g9.4
hdac4	2.19027e-07	0.136088	0.289	0.166	0.00327621	1_teal	hdac4
mycb2	2.43785e-07	0.195087	0.907	0.795	0.00364654	1_teal	mycb
reep5	2.51529e-07	0.235614	0.542	0.42	0.00376237	1_teal	reep5
tgm2b	2.5315e-07	0.104108	0.136	0.055	0.00378661	1_teal	tgm2b
cebpd1	2.6071e-07	0.292739	0.674	0.544	0.0038997	1_teal	cebpd
si:ch211-137i24.10	2.75582e-07	0.232807	0.508	0.355	0.00412216	1_teal	si:ch211-137i24.10
2020-06-01	3.08233e-07	0.180218	1	0.937	0.00461055	1_teal	jun
entpd1	4.23445e-07	0.14646	0.223	0.116	0.00633388	1_teal	entpd1
egr31	4.82202e-07	0.168041	0.252	0.138	0.00721278	1_teal	egr3
ppp1cb1	5.07932e-07	0.188168	0.505	0.367	0.00759765	1_teal	ppp1cb
arrdc2	5.66383e-07	0.22863	0.252	0.141	0.00847195	1_teal	arrdc2
ppp1r14bb	5.9514e-07	0.206123	0.412	0.281	0.0089021	1_teal	ppp1r14bb
npc2	6.2868e-07	0.235146	0.495	0.369	0.00940379	1_teal	npc2
vat1	6.87181e-07	0.222357	0.465	0.342	0.0102788	1_teal	vat1
pcdh10a	7.87531e-07	0.129197	0.259	0.146	0.0117799	1_teal	pcdh10a
il15	7.87796e-07	0.21111	0.203	0.106	0.0117838	1_teal	il15
cldn11b2	8.15154e-07	0.159492	0.485	0.34	0.0121931	1_teal	cldn11b
mbnl31	9.08845e-07	0.212788	0.694	0.575	0.0135945	1_teal	mbnl3
si:dkey-16l2.20	1.04414e-06	0.203239	0.422	0.293	0.0156183	1_teal	si:dkey-16l2.20
smoc21	1.10592e-06	0.165282	0.787	0.675	0.0165423	1_teal	smoc2
col4a3bpa	1.21072e-06	0.120465	0.269	0.155	0.01811	1_teal	col4a3bpa
smarca2	1.28037e-06	0.141106	0.349	0.219	0.0191518	1_teal	smarca2
phldb2b	1.4943e-06	0.138313	0.296	0.178	0.0223517	1_teal	phldb2b
gstm.11	1.5299e-06	0.214794	0.674	0.599	0.0228842	1_teal	gstm.1
tspan4a1	1.81956e-06	0.195049	0.399	0.283	0.027217	1_teal	tspan4a
plekhg42	2.2036e-06	0.181948	0.565	0.42	0.0329614	1_teal	plekhg4
il15ra	2.51167e-06	0.107017	0.259	0.147	0.0375695	1_teal	il15ra
aif1l1	2.65395e-06	0.195415	0.635	0.52	0.0396979	1_teal	aif1l
si:dkey-7j14.61	2.70802e-06	0.165516	0.807	0.771	0.0405066	1_teal	si:dkey-7j14.6
trpm6	3.02585e-06	0.137771	0.243	0.139	0.0452606	1_teal	trpm6
fosab1	3.24107e-06	0.160444	1	0.943	0.0484799	1_teal	fosab
b2m	3.40715e-06	0.197717	0.99	0.989	0.0509641	1_teal	b2m
rtn4a1	3.53525e-06	0.219402	0.635	0.546	0.0528803	1_teal	rtn4a
hmgn32	4.24823e-06	0.137916	0.455	0.318	0.063545	1_teal	hmgn3
klf11a1	4.31759e-06	0.122717	0.296	0.18	0.0645825	1_teal	klf11a
btg21	5.87794e-06	0.152974	0.99	0.912	0.0879222	1_teal	btg2
ptmaa	6.0747e-06	0.182861	0.831	0.755	0.0908653	1_teal	ptmaa
mycn	6.69493e-06	0.15976	0.415	0.278	0.100143	1_teal	mycn
tjp1a	6.75388e-06	0.158758	0.515	0.389	0.101025	1_teal	tjp1a
edem11	8.25134e-06	0.139475	0.409	0.279	0.123423	1_teal	edem1
dnmt3bb.1	8.49978e-06	0.108741	0.296	0.183	0.12714	1_teal	dnmt3bb.1
fkbp14	8.95102e-06	0.110642	0.272	0.166	0.133889	1_teal	fkbp14
bmpr2a1	9.14307e-06	0.157481	0.794	0.718	0.136762	1_teal	bmpr2a
sult1st61	1.00125e-05	0.134526	0.286	0.178	0.149767	1_teal	sult1st6
fndc3ba	1.24888e-05	0.137613	0.432	0.305	0.186808	1_teal	fndc3ba
cnn3a1	1.26232e-05	0.160776	0.246	0.145	0.188818	1_teal	cnn3a
ktn11	1.31495e-05	0.152553	0.435	0.309	0.196691	1_teal	ktn1
slc43a3b1	1.37013e-05	0.229335	0.571	0.486	0.204945	1_teal	slc43a3b
metrn2	1.51702e-05	0.153926	0.591	0.451	0.226916	1_teal	metrn
actb11	1.73294e-05	0.169757	0.92	0.87	0.259214	1_teal	actb1
tmem176l.11	1.83192e-05	0.19609	0.681	0.602	0.274018	1_teal	tmem176l.1
pdlim21	1.95758e-05	0.164273	0.266	0.168	0.292815	1_teal	pdlim2
nos1apa.11	2.39697e-05	0.128202	0.455	0.338	0.358538	1_teal	nos1apa.1
zgc:1748632	2.41431e-05	0.137183	0.904	0.812	0.361133	1_teal	zgc:174863
ccdc80	2.49464e-05	0.157916	0.332	0.228	0.373148	1_teal	ccdc80
si:ch211-79k12.1	2.55288e-05	0.13717	0.419	0.297	0.381859	1_teal	si:ch211-79k12.1
cav2	2.66749e-05	0.155457	0.415	0.302	0.399004	1_teal	cav2
ubb1	2.77903e-05	0.264104	0.734	0.645	0.415688	1_teal	ubb
aldob	3.0588e-05	0.264081	0.419	0.31	0.457536	1_teal	aldob
cd1641	3.09578e-05	0.170147	0.435	0.325	0.463068	1_teal	cd164
tpm4a	3.32422e-05	0.194762	0.664	0.605	0.497237	1_teal	tpm4a
gmps3	3.33207e-05	0.135666	0.831	0.691	0.498411	1_teal	gmps
creb3l3l	3.34726e-05	0.162857	0.488	0.38	0.500683	1_teal	creb3l3l
plk2b1	3.53421e-05	0.103987	0.223	0.131	0.528647	1_teal	plk2b
map7d1a1	3.75032e-05	0.120821	0.369	0.259	0.560973	1_teal	map7d1a
srpra3	3.89793e-05	0.156676	0.784	0.667	0.583053	1_teal	srpra
pim22	3.94624e-05	0.222022	0.485	0.383	0.590279	1_teal	pim2
mhc2dab	3.97626e-05	0.170098	0.336	0.225	0.594769	1_teal	mhc2dab
anxa2a	4.03215e-05	0.269751	0.561	0.457	0.603129	1_teal	anxa2a
hs3st3b1b	4.10837e-05	0.176807	0.449	0.339	0.61453	1_teal	hs3st3b1b
f10	4.202e-05	0.157396	0.455	0.341	0.628536	1_teal	f10
parp12a	4.25964e-05	0.121842	0.279	0.182	0.637158	1_teal	parp12a
sept9a3	4.92742e-05	0.185261	0.518	0.409	0.737044	1_teal	sept9a
srpk1a	4.99589e-05	0.116646	0.415	0.303	0.747284	1_teal	srpk1a
wu:fj16a031	5.05209e-05	0.147787	0.399	0.284	0.755691	1_teal	wu:fj16a03
myl9a2	5.22987e-05	0.140011	0.757	0.704	0.782284	1_teal	myl9a
emp2	5.46265e-05	0.120604	0.462	0.346	0.817104	1_teal	emp2
si:busm1-57f23.12	5.59525e-05	0.179671	0.332	0.226	0.836938	1_teal	si:busm1-57f23.1
itga5	5.78311e-05	0.126619	0.409	0.299	0.865037	1_teal	itga5
tagln2	5.98963e-05	0.258514	0.475	0.4	0.89593	1_teal	tagln2
pnp5a2	6.46638e-05	0.17595	0.571	0.458	0.967241	1_teal	pnp5a
robo11	6.60996e-05	0.125129	0.472	0.346	0.988718	1_teal	robo1
ponzr12	6.67722e-05	0.120585	0.99	0.968	0.998779	1_teal	ponzr1
ppp1r9alb	6.73147e-05	0.130978	0.379	0.274	1	1_teal	ppp1r9alb
slc35f23	6.97642e-05	0.178645	0.565	0.444	1	1_teal	slc35f2
tjap1	7.60774e-05	0.116344	0.282	0.189	1	1_teal	tjap1
svild1	7.91921e-05	0.192006	0.392	0.293	1	1_teal	svild
emx2	8.80878e-05	0.17367	0.691	0.638	1	1_teal	emx2
wbp2nl	8.96289e-05	0.185495	0.362	0.267	1	1_teal	wbp2nl
notch33	9.2396e-05	0.142555	0.953	0.811	1	1_teal	notch3
zgc:114200	9.52659e-05	0.156475	0.302	0.205	1	1_teal	zgc:114200
ampd2b3	9.63068e-05	0.103808	0.468	0.341	1	1_teal	ampd2b
pbxip1a	0.000100063	0.101934	0.292	0.194	1	1_teal	pbxip1a
ppp1r15a1	0.000104129	0.132326	0.352	0.242	1	1_teal	ppp1r15a
rftn21	0.000111763	0.103606	0.389	0.276	1	1_teal	rftn2
cnn2	0.000116179	0.242515	0.468	0.382	1	1_teal	cnn2
adma	0.000117505	0.13322	0.07	0.026	1	1_teal	adma
cx431	0.000133854	0.178841	0.449	0.347	1	1_teal	cx43
slc43a2b	0.000135471	0.103676	0.219	0.135	1	1_teal	slc43a2b
fosb1	0.000145968	0.106914	0.944	0.819	1	1_teal	fosb
kpna4	0.00017014	0.132252	0.213	0.133	1	1_teal	kpna4
msna1	0.000178192	0.145556	0.731	0.683	1	1_teal	msna
coq10b	0.000193096	0.108741	0.286	0.192	1	1_teal	coq10b
adamts21	0.000202827	0.111181	0.429	0.32	1	1_teal	adamts2
hsp90aa1.21	0.000209167	0.212183	0.721	0.625	1	1_teal	hsp90aa1.2
CABZ01068367.11	0.000235309	0.112689	0.498	0.382	1	1_teal	CABZ01068367.1
etnk1	0.000239446	0.109119	0.389	0.282	1	1_teal	etnk1
dnajb1b1	0.000256555	0.158689	0.764	0.658	1	1_teal	dnajb1b
capn2a1	0.000262158	0.101861	0.425	0.312	1	1_teal	capn2a
BX284696.12	0.000271373	0.254413	0.352	0.258	1	1_teal	BX284696.1
si:ch211-178n15.1	0.000280365	0.104193	0.302	0.208	1	1_teal	si:ch211-178n15.1
tln11	0.000289396	0.15535	0.488	0.394	1	1_teal	tln1
jdp2b1	0.000305154	0.13063	0.92	0.816	1	1_teal	jdp2b
ccn1	0.000331883	0.236055	0.359	0.262	1	1_teal	ccn1
lxn	0.00038103	0.137933	0.279	0.194	1	1_teal	lxn
bcam	0.000436618	0.102524	0.887	0.822	1	1_teal	bcam
si:ch211-250c4.41	0.000453969	0.11714	0.468	0.365	1	1_teal	si:ch211-250c4.4
capza1b	0.000478784	0.166317	0.282	0.206	1	1_teal	capza1b
ctdspla	0.000486106	0.11123	0.296	0.206	1	1_teal	ctdspla
agrn1	0.000513779	0.120897	0.837	0.787	1	1_teal	agrn
nrarpa2	0.000536194	0.140591	0.728	0.617	1	1_teal	nrarpa
cox4i2	0.000601753	0.16697	0.488	0.405	1	1_teal	cox4i2
amh1	0.0006207	0.142498	0.488	0.39	1	1_teal	amh
hsd3b7	0.000632399	0.132644	0.173	0.106	1	1_teal	hsd3b7
myl12.1	0.000692975	0.136124	0.787	0.739	1	1_teal	myl12.1
mt2	0.000809818	0.324592	0.173	0.107	1	1_teal	mt2
rhoab1	0.000859609	0.202586	0.372	0.295	1	1_teal	rhoab
rnf19a	0.000879819	0.143956	0.302	0.222	1	1_teal	rnf19a
sdc41	0.000920056	0.163567	0.698	0.633	1	1_teal	sdc4
mcl1a1	0.000953972	0.136787	0.847	0.76	1	1_teal	mcl1a
zbtb16a	0.00101847	0.11837	0.266	0.188	1	1_teal	zbtb16a
id2b	0.0010223	0.226263	0.249	0.17	1	1_teal	id2b
ctsd	0.00121594	0.163512	0.355	0.275	1	1_teal	ctsd
tead1b	0.00123081	0.120186	0.452	0.36	1	1_teal	tead1b
tob1b1	0.00126317	0.18178	0.611	0.566	1	1_teal	tob1b
tuba8l4	0.0014158	0.19851	0.555	0.496	1	1_teal	tuba8l4
si:ch73-189n23.1	0.00144448	0.162606	0.06	0.025	1	1_teal	si:ch73-189n23.1
ier2a1	0.00144528	0.171554	0.754	0.693	1	1_teal	ier2a
ubc1	0.00151764	0.12367	0.754	0.703	1	1_teal	ubc
si:dkey-74k8.31	0.0015515	0.100787	0.316	0.231	1	1_teal	si:dkey-74k8.3
selenow11	0.00196483	0.15282	0.641	0.574	1	1_teal	selenow1
cyb5a	0.00199663	0.147098	0.136	0.083	1	1_teal	cyb5a
fam120a2	0.00200756	0.110042	0.502	0.402	1	1_teal	fam120a
ywhaz	0.00201327	0.113533	0.761	0.733	1	1_teal	ywhaz
sod1	0.00201962	0.165538	0.442	0.375	1	1_teal	sod1
fabp3	0.00208669	0.139024	0.186	0.124	1	1_teal	fabp3
dag12	0.0021913	0.134175	0.774	0.76	1	1_teal	dag1
klf3	0.00229173	0.1003	0.272	0.198	1	1_teal	klf3
gabarapb1	0.00232429	0.101011	0.801	0.82	1	1_teal	gabarapb
si:ch211-195b13.1	0.00237947	0.125823	0.133	0.08	1	1_teal	si:ch211-195b13.1
ctsa1	0.00245264	0.139497	0.385	0.303	1	1_teal	ctsa
tubb4b1	0.00247449	0.152363	0.654	0.61	1	1_teal	tubb4b
nhsl21	0.00254235	0.132673	0.435	0.356	1	1_teal	nhsl2
gapdhs2	0.00257771	0.116891	0.784	0.768	1	1_teal	gapdhs
tjp2b	0.0027158	0.1277	0.246	0.18	1	1_teal	tjp2b
si:ch73-141c7.1	0.00272642	0.118769	0.236	0.17	1	1_teal	si:ch73-141c7.1
tspan36	0.0027318	0.116184	0.183	0.12	1	1_teal	tspan36
fthl27	0.00274065	0.103217	0.92	0.872	1	1_teal	fthl27
pmp22a	0.00290641	0.148291	0.349	0.276	1	1_teal	pmp22a
tdh2	0.00291313	0.207863	0.452	0.384	1	1_teal	tdh
serpinb1	0.00295267	0.122776	0.492	0.415	1	1_teal	serpinb1
appb	0.0029665	0.148512	0.346	0.275	1	1_teal	appb
si:ch211-15b10.6	0.00297347	0.166314	0.316	0.243	1	1_teal	si:ch211-15b10.6
snx6	0.00362779	0.109004	0.156	0.1	1	1_teal	snx6
dusp11	0.00396535	0.215295	0.405	0.349	1	1_teal	dusp1
pgrmc1	0.00404879	0.140942	0.522	0.466	1	1_teal	pgrmc1
serinc1	0.00459732	0.106055	0.435	0.353	1	1_teal	serinc1
map1lc3a1	0.00479529	0.125137	0.429	0.358	1	1_teal	map1lc3a
aldh2.2	0.00494102	0.117787	0.209	0.15	1	1_teal	aldh2.2
pnrc21	0.00556377	0.10578	0.877	0.835	1	1_teal	pnrc2
myl9b	0.00557306	0.143524	0.395	0.332	1	1_teal	myl9b
fscn1a1	0.00577849	0.108174	0.342	0.262	1	1_teal	fscn1a
fosl1a1	0.0065446	0.107076	0.701	0.625	1	1_teal	fosl1a
ctsla2	0.00671626	0.1488	0.664	0.631	1	1_teal	ctsla
uqcrfs11	0.00708574	0.115734	0.359	0.286	1	1_teal	uqcrfs1
2020-09-10	0.00718271	0.116818	0.375	0.306	1	1_teal	2020-09-10
qkia	0.00803054	0.155282	0.452	0.393	1	1_teal	qkia
spry2	0.0094375	0.126292	0.352	0.284	1	1_teal	spry2

## Sheet: SC1 (pink)
	p_val	avg_logFC	pct.1	pct.2	p_val_adj	cluster	gene
si:dkey-79f11.10	6.67366e-157	2.28169	0.778	0.011	9.98247e-153	1_pink	si:dkey-79f11.10
mxc	2.14846e-117	1.09464	0.667	0.012	3.21366e-113	1_pink	mxc
si:ch73-106k19.5	1.21402e-111	0.48666	0.37	0.002	1.81594e-107	1_pink	si:ch73-106k19.5
si:dkey-40g16.6	1.94544e-105	1.0402	0.593	0.011	2.90999e-101	1_pink	si:dkey-40g16.6
zgc:194101	4.5782e-104	2.14473	0.444	0.005	6.84807e-100	1_pink	zgc:194101
si:ch211-183d5.2	7.21645e-93	1.74409	0.704	0.021	1.07944e-88	1_pink	si:ch211-183d5.2
si:ch211-284e13.9	1.13042e-84	0.519901	0.556	0.013	1.69089e-80	1_pink	si:ch211-284e13.9
si:ch211-284e13.12	1.08378e-68	0.362656	0.333	0.005	1.62112e-64	1_pink	si:ch211-284e13.12
si:dkey-31e10.1	2.31625e-59	0.338367	0.259	0.003	3.46464e-55	1_pink	si:dkey-31e10.1
ccl19a.11	1.1132e-55	3.22096	0.63	0.033	1.66512e-51	1_pink	ccl19a.1
cd83	1.83755e-52	0.286553	0.185	0.001	2.7486e-48	1_pink	cd83
CR762483.11	1.78129e-46	1.46206	0.481	0.022	2.66446e-42	1_pink	CR762483.1
neurl1aa	6.70723e-46	0.257819	0.185	0.002	1.00327e-41	1_pink	neurl1aa
gch1	6.70723e-46	0.257819	0.185	0.002	1.00327e-41	1_pink	gch1
zmp:0000001138	6.26373e-45	0.550272	0.481	0.023	9.36929e-41	1_pink	zmp:0000001138
zgc:153631	6.5188e-41	0.484083	0.481	0.025	9.75082e-37	1_pink	zgc:153631
zgc:171506	1.1444e-40	0.590904	0.704	0.058	1.71179e-36	1_pink	zgc:171506
irf7	1.15538e-39	1.17362	0.741	0.072	1.72822e-35	1_pink	irf7
si:dkey-31g6.6	1.61787e-38	0.515452	0.37	0.015	2.42001e-34	1_pink	si:dkey-31g6.6
cox6b1	1.19247e-35	0.851258	0.63	0.054	1.78369e-31	1_pink	cox6b1
etv7	1.7335e-32	0.297173	0.333	0.015	2.59297e-28	1_pink	etv7
si:dkey-192g7.3	1.19443e-30	0.74315	0.63	0.062	1.78662e-26	1_pink	si:dkey-192g7.3
si:dkeyp-1h4.6	4.5259e-29	0.360411	0.222	0.007	6.76985e-25	1_pink	si:dkeyp-1h4.6
rarres3l	1.7086e-27	1.37103	0.741	0.113	2.55572e-23	1_pink	rarres3l
slc16a6b	5.01684e-27	0.104232	0.111	0.001	7.5042e-23	1_pink	slc16a6b
irf10	1.31509e-25	0.647857	0.667	0.086	1.96711e-21	1_pink	irf10
si:ch211-217k17.10	3.18665e-25	0.774518	0.296	0.016	4.76659e-21	1_pink	si:ch211-217k17.10
CT583625.5	4.02247e-25	0.399814	0.444	0.037	6.01682e-21	1_pink	CT583625.5
ftr43	4.12713e-25	0.587961	0.63	0.076	6.17336e-21	1_pink	ftr43
si:dkeyp-9d4.21	6.98722e-25	0.974043	0.778	0.133	1.04515e-20	1_pink	si:dkeyp-9d4.2
zgc:64002	8.11718e-25	0.409366	0.519	0.051	1.21417e-20	1_pink	zgc:64002
gbp1	1.48892e-24	1.42786	0.852	0.18	2.22713e-20	1_pink	gbp1
CABZ01079480.1	1.58421e-24	0.310071	0.407	0.032	2.36966e-20	1_pink	CABZ01079480.1
ehd1b	1.7699e-24	1.43177	0.741	0.13	2.64741e-20	1_pink	ehd1b
fas	2.12492e-24	0.447418	0.444	0.038	3.17846e-20	1_pink	fas
si:dkeyp-13a3.10	6.08131e-24	0.555049	0.444	0.04	9.09643e-20	1_pink	si:dkeyp-13a3.10
CU459094.21	7.45333e-24	0.994645	0.444	0.041	1.11487e-19	1_pink	CU459094.2
glipr2l	1.00153e-23	0.658768	0.222	0.009	1.49809e-19	1_pink	glipr2l
CABZ01073795.12	4.11525e-23	1.54554	0.815	0.17	6.15558e-19	1_pink	CABZ01073795.1
tapbpl	4.16451e-23	0.672415	0.704	0.108	6.22928e-19	1_pink	tapbpl
ccl35.2	1.16609e-22	0.48666	0.111	0.002	1.74423e-18	1_pink	ccl35.2
si:ch211-132p1.3	3.93667e-22	1.76309	0.926	0.273	5.88847e-18	1_pink	si:ch211-132p1.3
si:dkey-58f10.11	6.65149e-22	0.506354	0.444	0.044	9.94931e-18	1_pink	si:dkey-58f10.11
klf1	1.27729e-21	0.461418	0.148	0.004	1.91058e-17	1_pink	klf1
znf710a	2.03297e-21	0.163146	0.185	0.007	3.04092e-17	1_pink	znf710a
il34	3.28574e-20	0.321384	0.444	0.046	4.91481e-16	1_pink	il34
calcoco2	1.03877e-19	0.510205	0.63	0.095	1.5538e-15	1_pink	calcoco2
psma2	1.06843e-19	1.04315	0.741	0.163	1.59815e-15	1_pink	psma2
zgc:1946551	1.36093e-19	0.428094	0.444	0.049	2.03568e-15	1_pink	zgc:194655
si:ch1073-214b20.2	2.63741e-19	0.264795	0.296	0.021	3.94504e-15	1_pink	si:ch1073-214b20.2
banf1	3.58545e-19	1.03115	0.741	0.164	5.36312e-15	1_pink	banf1
psme21	3.69224e-19	1.38551	0.852	0.242	5.52286e-15	1_pink	psme2
ctss2.2	1.04183e-18	0.475871	0.333	0.029	1.55837e-14	1_pink	ctss2.2
si:ch211-245h14.1	1.50019e-18	0.523427	0.63	0.103	2.24398e-14	1_pink	si:ch211-245h14.1
psma5	1.7935e-18	0.866363	0.704	0.139	2.68271e-14	1_pink	psma5
si:dkey-23i12.71	1.81799e-18	1.66016	0.704	0.15	2.71935e-14	1_pink	si:dkey-23i12.7
zgc:171731	1.93082e-18	0.29054	0.296	0.023	2.88812e-14	1_pink	zgc:171731
hps5	2.38765e-18	0.235521	0.296	0.023	3.57145e-14	1_pink	hps5
nacad1	2.92798e-18	0.367951	0.296	0.023	4.37967e-14	1_pink	nacad
ccl35.1	2.98141e-18	0.924252	0.148	0.005	4.4596e-14	1_pink	ccl35.1
tap1	3.31395e-18	0.559655	0.444	0.055	4.95701e-14	1_pink	tap1
tapbp.11	3.35405e-18	1.10403	0.889	0.264	5.01699e-14	1_pink	tapbp.1
pmaip1	1.75642e-17	0.870045	0.407	0.046	2.62726e-13	1_pink	pmaip1
si:ch211-1a19.32	2.10608e-17	1.217	0.889	0.235	3.15028e-13	1_pink	si:ch211-1a19.3
si:dkey-58f10.7.1	2.68136e-17	0.249399	0.185	0.009	4.01078e-13	1_pink	si:dkey-58f10.7.1
BX950187.1	4.16724e-17	0.215949	0.222	0.014	6.23336e-13	1_pink	BX950187.1
psmd10	4.45758e-17	0.749476	0.259	0.019	6.66765e-13	1_pink	psmd10
rnf213a2	5.13429e-17	1.33767	0.963	0.408	7.67988e-13	1_pink	rnf213a
cxcl18a.1	5.61383e-17	0.915797	0.148	0.006	8.39717e-13	1_pink	cxcl18a.1
tnfrsf18	5.85624e-17	0.26204	0.296	0.025	8.75976e-13	1_pink	tnfrsf18
kif20bb	6.42346e-17	0.13252	0.148	0.006	9.60821e-13	1_pink	kif20bb
psme1	7.72776e-17	1.0284	0.815	0.231	1.15592e-12	1_pink	psme1
ube2l3b	9.13249e-17	0.921575	0.593	0.11	1.36604e-12	1_pink	ube2l3b
si:dkey-27p18.3	1.31502e-16	0.534521	0.667	0.13	1.96701e-12	1_pink	si:dkey-27p18.3
p2rx1	1.47336e-16	0.24884	0.185	0.01	2.20385e-12	1_pink	p2rx1
si:dkey-25e12.3	1.54657e-16	0.367628	0.407	0.048	2.31336e-12	1_pink	si:dkey-25e12.3
uba7	1.8489e-16	0.184984	0.222	0.014	2.76558e-12	1_pink	uba7
zgc:162944	2.35517e-16	1.08756	0.926	0.337	3.52287e-12	1_pink	zgc:162944
cbx7a1	2.37448e-16	0.838988	0.63	0.121	3.55175e-12	1_pink	cbx7a
nlrc5	3.52355e-16	0.208741	0.259	0.02	5.27052e-12	1_pink	nlrc5
rarres3	6.11216e-16	0.18554	0.222	0.015	9.14256e-12	1_pink	rarres3
ctsh	6.3987e-16	0.991895	0.852	0.266	9.57117e-12	1_pink	ctsh
si:dkey-31f5.81	6.68116e-16	0.386057	0.296	0.027	9.99368e-12	1_pink	si:dkey-31f5.8
xaf12	1.07133e-15	0.777388	0.741	0.183	1.6025e-11	1_pink	xaf1
b2m2	1.43209e-15	1.23887	1	0.989	2.14213e-11	1_pink	b2m
txn3	1.98236e-15	1.87152	0.481	0.077	2.96521e-11	1_pink	txn
cmtm6	2.7038e-15	0.714562	0.667	0.144	4.04435e-11	1_pink	cmtm6
zgc:101715	3.60391e-15	0.101978	0.111	0.003	5.39072e-11	1_pink	zgc:101715
anxa3b2	4.4118e-15	1.27446	0.667	0.161	6.59917e-11	1_pink	anxa3b
tap2t	5.84258e-15	0.184428	0.222	0.016	8.73933e-11	1_pink	tap2t
il21r.1	6.84365e-15	0.223771	0.148	0.007	1.02367e-10	1_pink	il21r.1
wu:fi04e12	7.16518e-15	0.329069	0.444	0.063	1.07177e-10	1_pink	wu:fi04e12
lima1a	8.35851e-15	0.246608	0.148	0.007	1.25027e-10	1_pink	lima1a
trafd1	1.20193e-14	0.484001	0.444	0.068	1.79785e-10	1_pink	trafd1
grinab	1.4165e-14	0.733929	0.63	0.141	2.1188e-10	1_pink	grinab
nid2a	7.36863e-14	0.156996	0.148	0.007	1.1022e-09	1_pink	nid2a
ifi35	8.5972e-14	0.820093	0.852	0.317	1.28597e-09	1_pink	ifi35
si:dkey-196h17.9	1.09755e-13	0.133081	0.111	0.004	1.64172e-09	1_pink	si:dkey-196h17.9
ftr91	1.15447e-13	0.22674	0.296	0.031	1.72686e-09	1_pink	ftr91
isg152	1.42603e-13	1.64123	0.963	0.465	2.13306e-09	1_pink	isg15
ftr56	1.91823e-13	0.37126	0.556	0.105	2.86928e-09	1_pink	ftr56
CU655842.1	1.98481e-13	0.402377	0.481	0.082	2.96888e-09	1_pink	CU655842.1
slco2b1	2.02122e-13	0.244937	0.185	0.012	3.02335e-09	1_pink	slco2b1
gk5	2.43015e-13	0.157553	0.185	0.012	3.63502e-09	1_pink	gk5
arl5c	3.35689e-13	0.794844	0.444	0.071	5.02124e-09	1_pink	arl5c
chchd6b	4.50053e-13	0.741763	0.667	0.169	6.7319e-09	1_pink	chchd6b
cd82a	5.4842e-13	1.23759	0.593	0.146	8.20326e-09	1_pink	cd82a
CABZ01115113.1	6.48941e-13	0.494583	0.37	0.053	9.70686e-09	1_pink	CABZ01115113.1
cadm41	7.32394e-13	0.674704	0.481	0.092	1.09552e-08	1_pink	cadm4
si:zfos-364h11.2	7.78477e-13	0.156438	0.185	0.013	1.16445e-08	1_pink	si:zfos-364h11.2
cxcl11.1	1.35893e-12	0.461981	0.074	0.002	2.03269e-08	1_pink	cxcl11.1
si:ch211-213a13.1	1.59591e-12	0.901438	0.593	0.146	2.38716e-08	1_pink	si:ch211-213a13.1
zgc:1526581	2.79833e-12	0.370997	0.407	0.064	4.18574e-08	1_pink	zgc:152658
mhc2b3	2.90704e-12	1.13756	0.889	0.401	4.34835e-08	1_pink	mhc2b
dhx58	3.27115e-12	0.35327	0.444	0.076	4.89299e-08	1_pink	dhx58
vamp5	3.46991e-12	0.348629	0.481	0.089	5.19029e-08	1_pink	vamp5
socs1a1	4.19254e-12	1.01455	0.481	0.095	6.2712e-08	1_pink	socs1a
hephl1a	7.9403e-12	0.59717	0.667	0.189	1.18771e-07	1_pink	hephl1a
psmg1	9.39661e-12	0.598457	0.444	0.084	1.40554e-07	1_pink	psmg1
tnfaip2a	1.18227e-11	0.412575	0.333	0.047	1.76844e-07	1_pink	tnfaip2a
irf2	1.41021e-11	0.753966	0.667	0.207	2.10939e-07	1_pink	irf2
ccny	1.9153e-11	0.100292	0.111	0.005	2.86491e-07	1_pink	ccny
si:ch73-27e22.3	1.9153e-11	0.100292	0.111	0.005	2.86491e-07	1_pink	si:ch73-27e22.3
si:ch211-212k18.15	2.19319e-11	0.333861	0.259	0.029	3.28057e-07	1_pink	si:ch211-212k18.15
ifi452	2.20285e-11	1.56771	0.852	0.326	3.29502e-07	1_pink	ifi45
si:cabz01101003.1	2.78741e-11	0.235965	0.333	0.047	4.16941e-07	1_pink	si:cabz01101003.1
lrch1	2.98594e-11	0.433959	0.333	0.049	4.46637e-07	1_pink	lrch1
tyk2	3.24324e-11	0.422791	0.37	0.061	4.85124e-07	1_pink	tyk2
zgc:174906	3.27471e-11	0.237729	0.185	0.015	4.89831e-07	1_pink	zgc:174906
FO744833.21	3.27515e-11	0.558233	0.704	0.206	4.89897e-07	1_pink	FO744833.2
nfkb22	3.45167e-11	0.493584	0.481	0.102	5.16301e-07	1_pink	nfkb2
hmox1a	3.77726e-11	0.32326	0.37	0.059	5.65002e-07	1_pink	hmox1a
lgals3a	4.58482e-11	0.519901	0.444	0.086	6.85797e-07	1_pink	lgals3a
casp7	4.93785e-11	0.477572	0.593	0.15	7.38604e-07	1_pink	casp7
march5l	7.61601e-11	0.573944	0.63	0.177	1.1392e-06	1_pink	march5l
batf3	8.43564e-11	0.152546	0.185	0.016	1.2618e-06	1_pink	batf3
zgc:1037003	1.02488e-10	1.03382	0.926	0.536	1.53302e-06	1_pink	zgc:103700
si:ch211-201o1.1	1.16902e-10	0.256004	0.259	0.032	1.74861e-06	1_pink	si:ch211-201o1.1
si:ch211-71m22.1	1.49412e-10	0.273063	0.296	0.041	2.2349e-06	1_pink	si:ch211-71m22.1
si:ch211-74m13.3	1.91777e-10	0.495104	0.407	0.075	2.8686e-06	1_pink	si:ch211-74m13.3
si:ch73-22o12.1	2.08548e-10	0.618187	0.667	0.219	3.11947e-06	1_pink	si:ch73-22o12.1
tomm34	2.21272e-10	0.29919	0.296	0.042	3.30978e-06	1_pink	tomm34
nub1	2.82781e-10	0.350589	0.37	0.065	4.22984e-06	1_pink	nub1
nansa	2.84609e-10	0.234358	0.259	0.032	4.25718e-06	1_pink	nansa
atg9a	4.18445e-10	0.33904	0.407	0.079	6.2591e-06	1_pink	atg9a
acp6	4.26216e-10	0.382501	0.407	0.08	6.37533e-06	1_pink	acp6
snap23.2	4.28498e-10	0.241342	0.296	0.042	6.40948e-06	1_pink	snap23.2
si:dkey-16l2.201	5.1429e-10	1.11676	0.741	0.308	7.69275e-06	1_pink	si:dkey-16l2.20
si:dkey-58f10.10	5.58283e-10	0.311728	0.333	0.054	8.3508e-06	1_pink	si:dkey-58f10.10
mxa	6.29319e-10	0.508175	0.444	0.092	9.41335e-06	1_pink	mxa
zgc:194443	7.13688e-10	0.151437	0.185	0.018	1.06753e-05	1_pink	zgc:194443
scrn3	7.58974e-10	0.408915	0.444	0.095	1.13527e-05	1_pink	scrn3
ifi303	9.96292e-10	1.0179	0.963	0.726	1.49025e-05	1_pink	ifi30
fmnl32	1.00227e-09	0.415851	0.519	0.126	1.49919e-05	1_pink	fmnl3
ccr8.1	1.0123e-09	0.175028	0.222	0.025	1.5142e-05	1_pink	ccr8.1
si:dkey-111e8.5	1.13443e-09	0.212062	0.185	0.018	1.69688e-05	1_pink	si:dkey-111e8.5
tdrd7b	1.13982e-09	0.182209	0.185	0.018	1.70495e-05	1_pink	tdrd7b
im:7152348	1.17979e-09	0.532805	0.333	0.056	1.76473e-05	1_pink	im:7152348
bida	1.21077e-09	0.422263	0.407	0.081	1.81107e-05	1_pink	bida
tagln	1.26379e-09	0.654526	0.222	0.026	1.89038e-05	1_pink	tagln
ogfrl2	1.32487e-09	0.521354	0.519	0.13	1.98173e-05	1_pink	ogfrl2
si:ch211-219a4.31	1.7107e-09	0.531153	0.556	0.155	2.55887e-05	1_pink	si:ch211-219a4.3
hmga1a1	1.90099e-09	0.857422	0.593	0.175	2.8435e-05	1_pink	hmga1a
gfpt1	2.02071e-09	0.125805	0.148	0.012	3.02259e-05	1_pink	gfpt1
eef1db1	2.14808e-09	0.669014	0.926	0.592	3.2131e-05	1_pink	eef1db
zgc:113314	2.19503e-09	0.678406	0.444	0.108	3.28333e-05	1_pink	zgc:113314
psma3	2.70113e-09	0.569638	0.63	0.192	4.04035e-05	1_pink	psma3
si:dkey-40c23.2.1	2.75673e-09	0.192846	0.259	0.036	4.12352e-05	1_pink	si:dkey-40c23.2.1
ehbp1l1a	3.15402e-09	0.130837	0.111	0.007	4.71779e-05	1_pink	ehbp1l1a
psmb10	3.34106e-09	0.638276	0.63	0.212	4.99755e-05	1_pink	psmb10
c4b	3.58731e-09	0.101978	0.074	0.003	5.3659e-05	1_pink	c4b
ftr11	3.7107e-09	0.19994	0.222	0.027	5.55047e-05	1_pink	ftr11
mhc2dab2	4.42422e-09	1.01889	0.667	0.237	6.61775e-05	1_pink	mhc2dab
srgn	4.61839e-09	0.761713	0.185	0.02	6.90818e-05	1_pink	srgn
ifit8	5.37297e-09	0.120798	0.148	0.012	8.03689e-05	1_pink	ifit8
si:ch211-244b2.4	5.56795e-09	0.314296	0.444	0.099	8.32855e-05	1_pink	si:ch211-244b2.4
mxe	6.4488e-09	0.469383	0.407	0.089	9.64612e-05	1_pink	mxe
g3bp1	6.48532e-09	0.567643	0.37	0.072	9.70074e-05	1_pink	g3bp1
psmb1	7.59372e-09	0.594569	0.63	0.208	0.000113587	1_pink	psmb1
gas2l1	8.7677e-09	0.17228	0.222	0.028	0.000131147	1_pink	gas2l1
btr31	9.38064e-09	0.22636	0.333	0.06	0.000140316	1_pink	btr31
hk2	1.0967e-08	0.160905	0.111	0.007	0.000164045	1_pink	hk2
acp5b	1.14185e-08	0.162025	0.111	0.007	0.000170799	1_pink	acp5b
rsad22	1.43658e-08	0.812435	0.444	0.109	0.000214883	1_pink	rsad2
wu:fj29h112	1.46467e-08	0.651655	0.593	0.194	0.000219086	1_pink	wu:fj29h11
ccl25b	1.7347e-08	0.402049	0.148	0.014	0.000259477	1_pink	ccl25b
ly751	1.98178e-08	0.362943	0.407	0.093	0.000296435	1_pink	ly75
adgrg1	2.08383e-08	0.2435	0.259	0.04	0.0003117	1_pink	adgrg1
CABZ01008730.1	2.14425e-08	0.147564	0.185	0.021	0.000320737	1_pink	CABZ01008730.1
h3f3d2	2.24377e-08	0.660814	0.963	0.743	0.000335623	1_pink	h3f3d
cxcl201	2.67194e-08	0.363453	0.333	0.063	0.000399669	1_pink	cxcl20
BX322530.1	2.85291e-08	0.380424	0.37	0.08	0.000426738	1_pink	BX322530.1
psmb2	2.9029e-08	0.61414	0.593	0.182	0.000434216	1_pink	psmb2
gadd45ab	2.92662e-08	0.30293	0.259	0.04	0.000437763	1_pink	gadd45ab
mov10b.1	3.3905e-08	0.327758	0.444	0.11	0.00050715	1_pink	mov10b.1
trim35-3	3.51963e-08	0.147012	0.185	0.021	0.000526467	1_pink	trim35-3
prdx1	3.72034e-08	0.186096	0.111	0.008	0.000556488	1_pink	prdx1
zgc:123107	3.72429e-08	0.380424	0.333	0.067	0.000557079	1_pink	zgc:123107
si:ch73-158p21.32	4.28538e-08	0.481958	0.741	0.276	0.000641007	1_pink	si:ch73-158p21.3
si:ch73-193i22.11	4.58938e-08	0.380342	0.407	0.095	0.00068648	1_pink	si:ch73-193i22.1
si:dkeyp-27c8.2	4.7613e-08	0.43516	0.519	0.148	0.000712195	1_pink	si:dkeyp-27c8.2
rfxank	4.94635e-08	0.27144	0.407	0.093	0.000739874	1_pink	rfxank
copz2	5.10617e-08	0.354821	0.37	0.08	0.00076378	1_pink	copz2
relb	5.25774e-08	0.560761	0.556	0.174	0.000786453	1_pink	relb
pmm2	5.44669e-08	0.167899	0.222	0.031	0.000814716	1_pink	pmm2
si:ch211-195o20.71	5.52037e-08	0.223179	0.296	0.053	0.000825738	1_pink	si:ch211-195o20.7
CR388143.1	6.33285e-08	0.267856	0.407	0.094	0.000947268	1_pink	CR388143.1
cd40	7.05939e-08	0.154768	0.148	0.015	0.00105594	1_pink	cd40
otulina.1	8.04818e-08	0.21948	0.333	0.066	0.00120385	1_pink	otulina.1
fam53b	8.44728e-08	0.268741	0.222	0.032	0.00126354	1_pink	fam53b
zgc:63863	8.78015e-08	0.197206	0.222	0.032	0.00131334	1_pink	zgc:63863
mavs	8.87591e-08	0.334836	0.407	0.098	0.00132766	1_pink	mavs
h3f3b.1.21	9.24199e-08	0.517372	0.852	0.368	0.00138242	1_pink	h3f3b.1.2
zgc:92107	9.556e-08	0.499487	0.222	0.034	0.00142939	1_pink	zgc:92107
si:dkey-40c23.2	1.04729e-07	0.265815	0.407	0.096	0.00156654	1_pink	si:dkey-40c23.2
si:dkey-33c12.4	1.37039e-07	0.538911	0.593	0.191	0.00204983	1_pink	si:dkey-33c12.4
pdia31	1.43911e-07	0.538593	0.704	0.273	0.00215263	1_pink	pdia3
parp9	1.51219e-07	0.377305	0.407	0.104	0.00226194	1_pink	parp9
gabarapl21	1.52135e-07	0.508273	0.519	0.165	0.00227563	1_pink	gabarapl2
rbp52	1.52964e-07	0.885007	0.667	0.264	0.00228804	1_pink	rbp5
cd632	1.6392e-07	0.715305	0.815	0.444	0.00245192	1_pink	cd63
ncoa4	2.51294e-07	0.393607	0.296	0.06	0.00375885	1_pink	ncoa4
otud4	2.59617e-07	0.288508	0.333	0.072	0.00388335	1_pink	otud4
si:dkey-23k10.5	2.67252e-07	0.302796	0.63	0.206	0.00399756	1_pink	si:dkey-23k10.5
mapk14a	2.71552e-07	0.363453	0.296	0.058	0.00406188	1_pink	mapk14a
erap1b	3.00844e-07	0.275773	0.185	0.025	0.00450002	1_pink	erap1b
eif4a1a	3.06102e-07	0.684964	0.519	0.158	0.00457868	1_pink	eif4a1a
si:ch211-244b2.3	3.46934e-07	0.306688	0.407	0.105	0.00518944	1_pink	si:ch211-244b2.3
stat1a1	3.64242e-07	0.651462	0.926	0.612	0.00544833	1_pink	stat1a
si:dkeyp-82a1.6	3.74147e-07	0.294262	0.333	0.074	0.00559649	1_pink	si:dkeyp-82a1.6
CABZ01020840.1	4.1471e-07	0.3663	0.185	0.025	0.00620324	1_pink	CABZ01020840.1
si:ch211-213a13.2	4.25302e-07	0.121353	0.148	0.016	0.00636167	1_pink	si:ch211-213a13.2
sec61a1l	4.66937e-07	0.35854	0.222	0.036	0.00698444	1_pink	sec61a1l
smx5.1	4.78981e-07	0.291106	0.148	0.016	0.00716459	1_pink	smx5.1
vcp	5.72615e-07	0.411353	0.519	0.161	0.00856517	1_pink	vcp
si:dkey-208m12.2	5.75694e-07	0.143156	0.185	0.025	0.00861123	1_pink	si:dkey-208m12.2
pbdc1	5.83674e-07	0.303245	0.519	0.146	0.0087306	1_pink	pbdc1
si:busm1-194e12.113	5.87965e-07	0.766532	0.741	0.401	0.00879479	1_pink	si:busm1-194e12.11
ly6m3	6.04789e-07	1.21745	0.333	0.078	0.00904643	1_pink	ly6m3
mfn1b	6.08205e-07	0.252153	0.37	0.09	0.00909753	1_pink	mfn1b
si:ch211-212k18.72	7.02546e-07	0.610193	0.667	0.265	0.0105087	1_pink	si:ch211-212k18.7
rdh10a1	7.83755e-07	0.646301	0.444	0.133	0.0117234	1_pink	rdh10a
plecb1	9.57744e-07	0.453108	0.444	0.13	0.0143259	1_pink	plecb
irf91	1.00619e-06	0.347601	0.556	0.189	0.0150505	1_pink	irf9
FO704779.1	1.0067e-06	0.159194	0.222	0.037	0.0150583	1_pink	FO704779.1
CABZ01086029.11	1.0451e-06	0.37998	0.556	0.197	0.0156326	1_pink	CABZ01086029.1
si:ch211-197g15.6.1	1.15226e-06	0.14096	0.185	0.027	0.0172354	1_pink	si:ch211-197g15.6.1
BX000534.11	1.31813e-06	0.49352	0.222	0.038	0.0197166	1_pink	BX000534.1
hspa82	1.44315e-06	0.570738	0.889	0.586	0.0215867	1_pink	hspa8
pomp	1.47341e-06	0.562264	0.593	0.232	0.0220392	1_pink	pomp
psma4	1.52941e-06	0.484546	0.519	0.172	0.0228769	1_pink	psma4
clic21	1.58189e-06	1.19104	0.333	0.085	0.0236618	1_pink	clic2
trim25	1.61768e-06	0.357997	0.556	0.196	0.0241972	1_pink	trim25
stat1b1	1.64303e-06	0.360033	0.444	0.132	0.0245764	1_pink	stat1b
psmb4	1.88584e-06	0.530386	0.481	0.165	0.0282085	1_pink	psmb4
gig2o1	1.88638e-06	0.327049	0.444	0.131	0.0282165	1_pink	gig2o
si:ch211-79k12.12	1.93845e-06	0.574047	0.667	0.312	0.0289953	1_pink	si:ch211-79k12.1
dixdc1a	2.32071e-06	0.171732	0.185	0.028	0.0347131	1_pink	dixdc1a
epsti1	2.46417e-06	0.303447	0.333	0.081	0.0368591	1_pink	epsti1
ube2d3	2.52845e-06	0.32801	0.222	0.04	0.0378205	1_pink	ube2d3
mhc1zba2	2.7047e-06	0.577408	0.963	0.794	0.040457	1_pink	mhc1zba
si:dkey-112a7.42	2.72072e-06	0.504062	0.37	0.104	0.0406965	1_pink	si:dkey-112a7.4
psma1	2.7462e-06	0.529269	0.704	0.331	0.0410776	1_pink	psma1
nemp2	3.08707e-06	0.176664	0.259	0.052	0.0461764	1_pink	nemp2
hexa	3.11443e-06	0.213681	0.37	0.095	0.0465857	1_pink	hexa
usp18	3.13058e-06	0.189047	0.222	0.04	0.0468272	1_pink	usp18
crfb4	3.27889e-06	0.193421	0.296	0.066	0.0490456	1_pink	crfb4
b2ml1	3.80489e-06	0.515016	1	0.941	0.0569136	1_pink	b2ml
zgc:1951732	3.97128e-06	0.453761	0.667	0.289	0.0594023	1_pink	zgc:195173
elavl4	4.41369e-06	0.156438	0.111	0.011	0.0660199	1_pink	elavl4
prdx6	4.93209e-06	0.478323	0.556	0.215	0.0737742	1_pink	prdx6
nfkbie	5.39126e-06	0.417429	0.444	0.151	0.0806425	1_pink	nfkbie
nedd9	5.55116e-06	0.230618	0.259	0.055	0.0830343	1_pink	nedd9
cxcl18b2	5.76993e-06	1.20551	0.63	0.25	0.0863066	1_pink	cxcl18b
irf1b1	6.29796e-06	0.837591	0.556	0.219	0.0942049	1_pink	irf1b
pkz	6.4458e-06	0.137127	0.185	0.03	0.0964163	1_pink	pkz
si:ch211-217k17.7	7.25463e-06	0.409266	0.37	0.104	0.108515	1_pink	si:ch211-217k17.7
nsfl1c	7.89229e-06	0.196067	0.222	0.042	0.118053	1_pink	nsfl1c
taok3a	8.16465e-06	0.137127	0.185	0.03	0.122127	1_pink	taok3a
polr3h	8.16598e-06	0.301899	0.259	0.056	0.122147	1_pink	polr3h
rcn1	8.30056e-06	0.248546	0.333	0.088	0.12416	1_pink	rcn1
tspy	8.42898e-06	0.141509	0.148	0.02	0.126081	1_pink	tspy
psma6l	8.45557e-06	0.401595	0.481	0.179	0.126478	1_pink	psma6l
cptp	8.61832e-06	0.199636	0.333	0.085	0.128913	1_pink	cptp
pdpk1a	8.83145e-06	0.167353	0.185	0.031	0.132101	1_pink	pdpk1a
adgrg1.1	8.97243e-06	0.283512	0.37	0.108	0.13421	1_pink	adgrg1.1
acsbg2	9.11666e-06	0.317867	0.333	0.089	0.136367	1_pink	acsbg2
scpep1	9.22955e-06	0.55362	0.407	0.13	0.138056	1_pink	scpep1
picalmb	9.78124e-06	0.230702	0.37	0.104	0.146308	1_pink	picalmb
gosr2	1.02956e-05	0.402593	0.444	0.163	0.154001	1_pink	gosr2
ciita1	1.11843e-05	0.346765	0.37	0.111	0.167295	1_pink	ciita
GCA1	1.13768e-05	0.451001	0.481	0.173	0.170175	1_pink	GCA
sp100.2	1.14128e-05	0.116368	0.148	0.021	0.170712	1_pink	sp100.2
ube2d1b	1.16744e-05	0.339621	0.37	0.109	0.174626	1_pink	ube2d1b
tnip1	1.21335e-05	0.518969	0.481	0.186	0.181493	1_pink	tnip1
si:ch1073-385f13.3	1.2191e-05	0.222378	0.185	0.032	0.182353	1_pink	si:ch1073-385f13.3
psma6a	1.29009e-05	0.351117	0.222	0.046	0.192972	1_pink	psma6a
zgc:1748633	1.36742e-05	0.529916	0.963	0.825	0.204539	1_pink	zgc:174863
ifit16	1.36964e-05	0.248625	0.37	0.107	0.20487	1_pink	ifit16
cdc42l	1.39738e-05	0.486408	0.593	0.261	0.20902	1_pink	cdc42l
dlg1	1.44777e-05	0.197128	0.259	0.058	0.216557	1_pink	dlg1
exosc8	1.48876e-05	0.11858	0.111	0.012	0.222689	1_pink	exosc8
sema4ba	1.78163e-05	0.223653	0.37	0.107	0.266496	1_pink	sema4ba
gnl1	1.81801e-05	0.32474	0.37	0.113	0.271939	1_pink	gnl1
gng12a	1.92714e-05	0.232725	0.37	0.11	0.288261	1_pink	gng12a
prim2	1.9512e-05	0.137127	0.185	0.033	0.291861	1_pink	prim2
arhgap12b	2.00387e-05	0.136035	0.185	0.033	0.299739	1_pink	arhgap12b
yme1l1a	2.14179e-05	0.114712	0.148	0.022	0.320369	1_pink	yme1l1a
uacab	2.15818e-05	0.165716	0.185	0.033	0.32282	1_pink	uacab
psmd3	2.50142e-05	0.227035	0.259	0.06	0.374162	1_pink	psmd3
parp12b	2.58257e-05	0.336035	0.481	0.177	0.386301	1_pink	parp12b
klf2a	2.69561e-05	0.10265	0.111	0.013	0.40321	1_pink	klf2a
psmc1b	2.72726e-05	0.214744	0.259	0.061	0.407943	1_pink	psmc1b
si:dkey-42i9.6	2.78909e-05	0.461914	0.593	0.261	0.417192	1_pink	si:dkey-42i9.6
kdm7aa	2.83691e-05	0.115263	0.148	0.023	0.424346	1_pink	kdm7aa
ube2d2	2.86418e-05	0.364674	0.481	0.174	0.428424	1_pink	ube2d2
calr3a	3.59873e-05	0.355274	0.407	0.136	0.538298	1_pink	calr3a
tspan361	3.69209e-05	0.678847	0.37	0.127	0.552262	1_pink	tspan36
AL590151.1	3.75683e-05	0.114712	0.148	0.023	0.561947	1_pink	AL590151.1
mhc1uba	3.80258e-05	0.11416	0.148	0.023	0.56879	1_pink	mhc1uba
nfkbiab2	3.86381e-05	1.06523	0.593	0.27	0.577948	1_pink	nfkbiab
atp2b1a	3.93989e-05	0.518071	0.37	0.119	0.589329	1_pink	atp2b1a
psmf11	3.97996e-05	0.361318	0.444	0.16	0.595323	1_pink	psmf1
pitpnaa	4.28785e-05	0.195024	0.148	0.024	0.641376	1_pink	pitpnaa
ftr22	4.34593e-05	0.145909	0.148	0.024	0.650064	1_pink	ftr22
ran1	4.4049e-05	0.519291	0.852	0.614	0.658885	1_pink	ran
adprm	4.45039e-05	0.144807	0.148	0.024	0.66569	1_pink	adprm
mbd2	4.89097e-05	0.212151	0.333	0.097	0.731592	1_pink	mbd2
si:ch73-380l3.2.1	5.10234e-05	0.121908	0.111	0.014	0.763208	1_pink	si:ch73-380l3.2.1
dkc11	5.16958e-05	0.430192	0.407	0.142	0.773265	1_pink	dkc1
ifi462	5.47946e-05	0.507524	0.926	0.698	0.819618	1_pink	ifi46
rbm471	5.61168e-05	0.132221	0.185	0.036	0.839395	1_pink	rbm47
si:ch211-212g7.6	6.04224e-05	0.14949	0.222	0.049	0.903798	1_pink	si:ch211-212g7.6
nr2f2	6.09916e-05	0.228928	0.148	0.025	0.912312	1_pink	nr2f2
bzw1b2	6.69696e-05	0.642943	0.593	0.282	1	1_pink	bzw1b
cirbpb2	7.04123e-05	0.487769	0.852	0.662	1	1_pink	cirbpb
psma8	7.63369e-05	0.372445	0.556	0.234	1	1_pink	psma8
qars	7.65504e-05	0.147564	0.111	0.015	1	1_pink	qars
il15ra2	7.79813e-05	0.252571	0.444	0.161	1	1_pink	il15ra
yars	7.86593e-05	0.132221	0.185	0.037	1	1_pink	yars
traf2b	8.23027e-05	0.112508	0.148	0.025	1	1_pink	traf2b
slc25a44a	8.32343e-05	0.111408	0.148	0.025	1	1_pink	slc25a44a
2020-09-02	8.33477e-05	0.426543	0.333	0.111	1	1_pink	2020-09-02
zgc:1527912	8.35412e-05	0.778898	0.667	0.385	1	1_pink	zgc:152791
morc3a	8.84996e-05	0.173018	0.296	0.082	1	1_pink	morc3a
pargl	9.05089e-05	0.284698	0.37	0.128	1	1_pink	pargl
FP102786.1	9.21646e-05	0.253186	0.296	0.085	1	1_pink	FP102786.1
chkb	9.24723e-05	0.132221	0.185	0.037	1	1_pink	chkb
pprc1	9.31207e-05	0.153791	0.148	0.025	1	1_pink	pprc1
trim35-14	0.000105231	0.380292	0.481	0.195	1	1_pink	trim35-14
bty	0.000105421	0.111408	0.148	0.025	1	1_pink	bty
LO018260.1	0.000110885	0.161906	0.185	0.038	1	1_pink	LO018260.1
sat1b	0.000113294	0.130049	0.185	0.038	1	1_pink	sat1b
kdm2bb	0.000123932	0.243719	0.259	0.07	1	1_pink	kdm2bb
si:dkey-188i13.102	0.000125588	0.365596	0.704	0.342	1	1_pink	si:dkey-188i13.10
ssuh2.2	0.000127188	0.161267	0.259	0.068	1	1_pink	ssuh2.2
nfyc	0.000130438	0.229105	0.222	0.053	1	1_pink	nfyc
ptges3b	0.000132682	0.28149	0.185	0.04	1	1_pink	ptges3b
mxb2	0.000132808	0.270415	0.259	0.068	1	1_pink	mxb
si:ch211-178n15.11	0.000139341	0.293381	0.519	0.22	1	1_pink	si:ch211-178n15.1
CABZ01038521.1	0.000139553	0.127339	0.185	0.038	1	1_pink	CABZ01038521.1
si:dkey-241l7.3	0.000143107	0.395664	0.148	0.027	1	1_pink	si:dkey-241l7.3
hsbp1a2	0.000143309	0.394897	0.519	0.229	1	1_pink	hsbp1a
chfr	0.000144857	0.171861	0.185	0.038	1	1_pink	chfr
RALGDS	0.000148835	0.145742	0.222	0.053	1	1_pink	RALGDS
ddx46	0.000148839	0.176664	0.185	0.039	1	1_pink	ddx46
max	0.000149899	0.444943	0.444	0.181	1	1_pink	max
pdss1	0.000152032	0.161267	0.259	0.069	1	1_pink	pdss1
cdv3	0.000152884	0.293964	0.37	0.122	1	1_pink	cdv3
mrpl27	0.000153105	0.14646	0.111	0.016	1	1_pink	mrpl27
dpt	0.000159209	0.158111	0.185	0.04	1	1_pink	dpt
cst14a.1	0.000161736	0.126258	0.185	0.039	1	1_pink	cst14a.1
lygl11	0.000161953	0.365984	0.37	0.139	1	1_pink	lygl1
vps13a	0.000162168	0.174527	0.222	0.054	1	1_pink	vps13a
aldh1a22	0.000176305	0.549331	0.852	0.621	1	1_pink	aldh1a2
smg1	0.000181915	0.236073	0.111	0.016	1	1_pink	smg1
uqcrc2b1	0.000183701	0.330011	0.333	0.109	1	1_pink	uqcrc2b
psmd7	0.000193762	0.316532	0.333	0.11	1	1_pink	psmd7
nop581	0.000195428	0.418721	0.481	0.204	1	1_pink	nop58
mtdha	0.000197946	0.353592	0.519	0.221	1	1_pink	mtdha
ube2a	0.000197976	0.376284	0.222	0.056	1	1_pink	ube2a
ZNF335	0.000198779	0.110858	0.148	0.027	1	1_pink	ZNF335
cox20	0.000207233	0.16528	0.296	0.087	1	1_pink	cox20
tubb2b1	0.000207555	0.40704	0.259	0.075	1	1_pink	tubb2b
gbp2	0.000216036	0.156012	0.259	0.071	1	1_pink	gbp2
psmb31	0.000231333	0.537578	0.407	0.167	1	1_pink	psmb3
canx	0.000244932	0.385454	0.37	0.136	1	1_pink	canx
zgc:153759	0.000245833	0.108663	0.148	0.028	1	1_pink	zgc:153759
rnf114	0.000249096	0.184723	0.185	0.041	1	1_pink	rnf114
tfr1b	0.000250833	0.108663	0.148	0.028	1	1_pink	tfr1b
acat2	0.000274862	0.120798	0.111	0.017	1	1_pink	acat2
trim35-20	0.000274862	0.120798	0.111	0.017	1	1_pink	trim35-20
CU984600.22	0.000298717	0.239457	0.333	0.112	1	1_pink	CU984600.2
si:rp71-36a1.5.1	0.000314138	0.289377	0.481	0.209	1	1_pink	si:rp71-36a1.5.1
eri1	0.000315783	0.164252	0.296	0.09	1	1_pink	eri1
txnipa2	0.000319018	0.418394	0.481	0.208	1	1_pink	txnipa
c19h1orf109	0.000322391	0.190255	0.222	0.058	1	1_pink	c19h1orf109
eif4g3b	0.000328348	0.138768	0.148	0.029	1	1_pink	eif4g3b
abca1b	0.000329919	0.125717	0.185	0.042	1	1_pink	abca1b
nfkbib1	0.000334141	0.422263	0.444	0.203	1	1_pink	nfkbib
kctd5a	0.0003535	0.425651	0.519	0.243	1	1_pink	kctd5a
sdcbp22	0.000354034	0.418946	0.704	0.423	1	1_pink	sdcbp2
si:ch211-281l24.31	0.000366713	0.337055	0.556	0.26	1	1_pink	si:ch211-281l24.3
marcksl1b2	0.000378399	0.915498	0.926	0.902	1	1_pink	marcksl1b
thrap3b	0.000379808	0.361318	0.333	0.12	1	1_pink	thrap3b
litaf2	0.000403676	0.352933	0.333	0.121	1	1_pink	litaf
dnajb14	0.000411026	0.142008	0.222	0.058	1	1_pink	dnajb14
trim8b	0.00042008	0.336359	0.296	0.098	1	1_pink	trim8b
nlrx1	0.000423774	0.109211	0.148	0.029	1	1_pink	nlrx1
tnfsf10l4	0.000435993	0.107567	0.148	0.029	1	1_pink	tnfsf10l4
ecpas	0.000435993	0.107567	0.148	0.029	1	1_pink	ecpas
cmtm3	0.000450713	0.142008	0.222	0.059	1	1_pink	cmtm3
tnfrsf1a	0.000454319	0.220647	0.333	0.117	1	1_pink	tnfrsf1a
irf81	0.000456991	0.104867	0.185	0.042	1	1_pink	irf8
sec23ip	0.00046015	0.140943	0.222	0.059	1	1_pink	sec23ip
rbp2a	0.000460549	0.156438	0.074	0.008	1	1_pink	rbp2a
ubxn7	0.000475945	0.173608	0.333	0.113	1	1_pink	ubxn7
copz1	0.000504767	0.225339	0.296	0.094	1	1_pink	copz1
dusp16	0.000514359	0.107567	0.148	0.03	1	1_pink	dusp16
si:ch211-11p18.6.1	0.000519152	0.107019	0.148	0.03	1	1_pink	si:ch211-11p18.6.1
glrx	0.00052943	0.298811	0.222	0.062	1	1_pink	glrx
cars	0.000536109	0.125717	0.185	0.044	1	1_pink	cars
tp531	0.000539423	0.246515	0.37	0.137	1	1_pink	tp53
PLEKHH32	0.000564971	0.315183	0.519	0.243	1	1_pink	PLEKHH3
sri2	0.000582019	0.63711	0.407	0.171	1	1_pink	sri
LO017938.1	0.000584817	0.119255	0.185	0.044	1	1_pink	LO017938.1
zgc:114174	0.000606562	0.140412	0.222	0.06	1	1_pink	zgc:114174
dazap1	0.000614491	0.106472	0.148	0.03	1	1_pink	dazap1
cep89	0.000618479	0.124098	0.185	0.045	1	1_pink	cep89
phkg2	0.000618479	0.124098	0.185	0.045	1	1_pink	phkg2
zcchc10	0.000636431	0.122481	0.185	0.045	1	1_pink	zcchc10
ube4b	0.000670031	0.122481	0.148	0.03	1	1_pink	ube4b
psmd14	0.000676773	0.166822	0.222	0.06	1	1_pink	psmd14
chmp7	0.000697304	0.186006	0.333	0.117	1	1_pink	chmp7
atp5mc3a1	0.000700274	0.392801	0.667	0.4	1	1_pink	atp5mc3a
zgc:173570	0.000704186	0.17613	0.259	0.08	1	1_pink	zgc:173570
gramd1c	0.000723225	0.105925	0.148	0.031	1	1_pink	gramd1c
mxd3	0.000729697	0.105379	0.148	0.031	1	1_pink	mxd3
alg13	0.000761162	0.10265	0.111	0.019	1	1_pink	alg13
plscr3b1	0.000767567	0.238489	0.296	0.098	1	1_pink	plscr3b
psmd12	0.00077215	0.239522	0.185	0.047	1	1_pink	psmd12
psmd11b	0.000782114	0.188325	0.296	0.101	1	1_pink	psmd11b
tmsb3	0.000804357	0.126258	0.148	0.032	1	1_pink	tmsb
COX5B1	0.000819282	0.388079	0.778	0.484	1	1_pink	COX5B
tmem167a	0.000824599	0.189984	0.259	0.078	1	1_pink	tmem167a
stat3	0.000831931	0.106472	0.148	0.032	1	1_pink	stat3
cdc42l2	0.000831931	0.106472	0.148	0.032	1	1_pink	cdc42l2
gpr157	0.000839249	0.105925	0.148	0.032	1	1_pink	gpr157
smarce1	0.000857628	0.234567	0.333	0.117	1	1_pink	smarce1
pum3	0.000861322	0.139316	0.111	0.019	1	1_pink	pum3
plekho2	0.000861417	0.234753	0.296	0.103	1	1_pink	plekho2
rabep2	0.000869087	0.103741	0.148	0.032	1	1_pink	rabep2
bicc1a	0.000903751	0.166261	0.148	0.033	1	1_pink	bicc1a
riok1	0.000939253	0.150994	0.296	0.098	1	1_pink	riok1
nfatc2ip	0.000950311	0.16954	0.111	0.02	1	1_pink	nfatc2ip
cd74a3	0.000962544	0.432509	1	0.93	1	1_pink	cd74a
mical3a	0.000969215	0.105925	0.148	0.032	1	1_pink	mical3a
SBNO2	0.000977361	0.145585	0.259	0.081	1	1_pink	SBNO2
srp19	0.000999408	0.267346	0.222	0.067	1	1_pink	srp19
tnfsf101	0.00103149	0.180069	0.333	0.121	1	1_pink	tnfsf10
ezrb	0.00104137	0.217373	0.185	0.049	1	1_pink	ezrb
cish1	0.00108399	0.228007	0.37	0.147	1	1_pink	cish
sap30bp	0.00109435	0.108046	0.185	0.046	1	1_pink	sap30bp
ttc7b	0.00110016	0.121405	0.185	0.047	1	1_pink	ttc7b
si:dkey-28b4.71	0.00113446	0.280228	0.407	0.161	1	1_pink	si:dkey-28b4.7
spryd4	0.00114453	0.105925	0.111	0.02	1	1_pink	spryd4
ikbkg	0.00120614	0.280959	0.185	0.051	1	1_pink	ikbkg
cd248a1	0.00123828	0.115816	0.111	0.02	1	1_pink	cd248a
hrasb	0.00127728	0.244772	0.222	0.067	1	1_pink	hrasb
pphln1	0.0013696	0.146812	0.148	0.033	1	1_pink	pphln1
dad1	0.00137015	0.344507	0.556	0.285	1	1_pink	dad1
zgc:66427	0.00139118	0.204765	0.333	0.128	1	1_pink	zgc:66427
dnaja2b	0.00141579	0.166822	0.259	0.085	1	1_pink	dnaja2b
phpt1	0.00142572	0.144807	0.111	0.021	1	1_pink	phpt1
setx	0.0014302	0.203024	0.296	0.105	1	1_pink	setx
tbk1	0.0014486	0.202015	0.296	0.107	1	1_pink	tbk1
pigb	0.0014698	0.121405	0.185	0.049	1	1_pink	pigb
dock6	0.00150174	0.103741	0.148	0.034	1	1_pink	dock6
fbl1	0.00152182	0.329232	0.407	0.173	1	1_pink	fbl
tspan37	0.00152632	0.10265	0.148	0.034	1	1_pink	tspan37
shrprbck1r	0.00153722	0.225033	0.37	0.154	1	1_pink	shrprbck1r
plxnb2a	0.0015457	0.226945	0.37	0.154	1	1_pink	plxnb2a
zgc:171480	0.00155892	0.150785	0.185	0.049	1	1_pink	zgc:171480
psme4b	0.00157753	0.14403	0.259	0.085	1	1_pink	psme4b
bmp1a	0.00157968	0.174111	0.296	0.106	1	1_pink	bmp1a
kras	0.00158691	0.244964	0.37	0.158	1	1_pink	kras
chaf1a	0.00160116	0.134399	0.111	0.021	1	1_pink	chaf1a
cct5	0.00161739	0.301136	0.519	0.248	1	1_pink	cct5
odc12	0.00166031	0.326888	0.556	0.261	1	1_pink	odc1
grna3	0.0016678	0.22129	0.593	0.308	1	1_pink	grna
ppp1caa	0.00169626	0.244195	0.333	0.124	1	1_pink	ppp1caa
rbm22	0.0016973	0.179343	0.148	0.035	1	1_pink	rbm22
ercc5	0.00172513	0.116575	0.185	0.05	1	1_pink	ercc5
sec31a	0.00172513	0.116575	0.185	0.05	1	1_pink	sec31a
mtif2	0.00175923	0.101017	0.148	0.034	1	1_pink	mtif2
ppm1h	0.00177327	0.101017	0.148	0.034	1	1_pink	ppm1h
recql	0.00178741	0.100473	0.148	0.034	1	1_pink	recql
zeb2a	0.00181633	0.147012	0.111	0.021	1	1_pink	zeb2a
tuba8l41	0.00182111	0.500553	0.704	0.503	1	1_pink	tuba8l4
rps6kb1b	0.00184864	0.213171	0.222	0.069	1	1_pink	rps6kb1b
optn	0.00194358	0.299937	0.333	0.136	1	1_pink	optn
hsp90ab12	0.00194627	0.242187	1	0.984	1	1_pink	hsp90ab1
crfb1	0.00198762	0.101561	0.148	0.035	1	1_pink	crfb1
si:ch211-271e10.2	0.00209445	0.11497	0.185	0.051	1	1_pink	si:ch211-271e10.2
abhd16a	0.00212142	0.13835	0.259	0.087	1	1_pink	abhd16a
dlg3	0.00212247	0.166308	0.259	0.089	1	1_pink	dlg3
hnrnpa0l.1	0.00218313	0.483902	0.704	0.469	1	1_pink	hnrnpa0l.1
birc2	0.00224879	0.259714	0.222	0.072	1	1_pink	birc2
sec11a	0.0022511	0.303875	0.37	0.161	1	1_pink	sec11a
timm23a	0.00226948	0.178152	0.222	0.068	1	1_pink	timm23a
psmd4a	0.00229128	0.211642	0.259	0.092	1	1_pink	psmd4a
ezh2	0.00229856	0.119688	0.074	0.011	1	1_pink	ezh2
lgals171	0.00230454	0.418167	0.37	0.16	1	1_pink	lgals17
gars	0.00231569	0.223151	0.296	0.115	1	1_pink	gars
mrpl38	0.00232523	0.126968	0.259	0.084	1	1_pink	mrpl38
sox4b	0.00232852	0.11989	0.222	0.068	1	1_pink	sox4b
zgc:171446	0.00233734	0.119688	0.074	0.011	1	1_pink	zgc:171446
cyyr1	0.00247908	0.127733	0.222	0.069	1	1_pink	cyyr1
slc35a4	0.0024842	0.173186	0.333	0.132	1	1_pink	slc35a4
tomm22	0.00248541	0.17613	0.222	0.069	1	1_pink	tomm22
hpgd2	0.00250545	0.302951	0.37	0.149	1	1_pink	hpgd
snrpd2	0.00250785	0.329069	0.296	0.118	1	1_pink	snrpd2
rnf213b1	0.00250898	0.526672	0.37	0.16	1	1_pink	rnf213b
si:dkey-256h2.11	0.00251805	0.194479	0.148	0.037	1	1_pink	si:dkey-256h2.1
mt-nd12	0.00255988	0.340025	0.926	0.785	1	1_pink	mt-nd1
psmd1	0.00256562	0.23526	0.222	0.072	1	1_pink	psmd1
abcf2a	0.00257441	0.167353	0.111	0.023	1	1_pink	abcf2a
ndufa12	0.00259417	0.211757	0.296	0.108	1	1_pink	ndufa12
mafba2	0.00262474	0.370665	0.481	0.226	1	1_pink	mafba
zfhx41	0.00264498	0.17613	0.222	0.071	1	1_pink	zfhx4
kars1	0.00271396	0.325309	0.296	0.121	1	1_pink	kars
cmpk	0.00271563	0.135489	0.111	0.023	1	1_pink	cmpk
snrpb	0.00271681	0.365551	0.37	0.161	1	1_pink	snrpb
mfn2	0.00275603	0.146277	0.185	0.054	1	1_pink	mfn2
eif2d	0.00284888	0.112302	0.185	0.053	1	1_pink	eif2d
clic1	0.00286456	0.199459	0.444	0.203	1	1_pink	clic1
slf2	0.00289922	0.116575	0.185	0.053	1	1_pink	slf2
chtopa	0.0029148	0.281102	0.481	0.226	1	1_pink	chtopa
zgc:100829	0.00296727	0.197192	0.444	0.208	1	1_pink	zgc:100829
si:ch73-233k15.21	0.00296788	0.264961	0.296	0.117	1	1_pink	si:ch73-233k15.2
eif4e1c	0.00298057	0.191837	0.148	0.037	1	1_pink	eif4e1c
snw1	0.00303499	0.230702	0.222	0.074	1	1_pink	snw1
gtf2b	0.0030975	0.175061	0.148	0.038	1	1_pink	gtf2b
spag1a	0.00314255	0.161363	0.148	0.038	1	1_pink	spag1a
ap5m1	0.00315231	0.101017	0.148	0.037	1	1_pink	ap5m1
ovca2	0.00317548	0.100473	0.148	0.037	1	1_pink	ovca2
etfb	0.00321604	0.223126	0.296	0.115	1	1_pink	etfb
gtpbp10	0.00323709	0.114436	0.185	0.054	1	1_pink	gtpbp10
nup210	0.00331852	0.124065	0.222	0.072	1	1_pink	nup210
xiap	0.00333052	0.143512	0.185	0.053	1	1_pink	xiap
cdc73	0.00335078	0.147882	0.148	0.038	1	1_pink	cdc73
abcf1	0.00337086	0.28438	0.259	0.095	1	1_pink	abcf1
cnot11	0.00337921	0.136697	0.185	0.054	1	1_pink	cnot11
arhgap10	0.00338174	0.153918	0.222	0.073	1	1_pink	arhgap10
sept7b1	0.00339056	0.154038	0.222	0.071	1	1_pink	sept7b
api5	0.00345139	0.236555	0.259	0.093	1	1_pink	api5
qdprb2	0.00360248	0.16814	0.111	0.023	1	1_pink	qdprb2
hbegfa2	0.0036189	0.323862	0.37	0.16	1	1_pink	hbegfa
si:ch73-27e22.8	0.00362444	0.143073	0.185	0.055	1	1_pink	si:ch73-27e22.8
nuak2	0.00363148	0.113609	0.111	0.024	1	1_pink	nuak2
zgc:153993	0.00364636	0.137835	0.259	0.093	1	1_pink	zgc:153993
si:ch211-59h6.1	0.00377171	0.134239	0.259	0.093	1	1_pink	si:ch211-59h6.1
zgc:77650	0.00387524	0.249628	0.222	0.073	1	1_pink	zgc:77650
mbd3b	0.0039315	0.126159	0.222	0.073	1	1_pink	mbd3b
arpc41	0.00396978	0.206737	0.259	0.095	1	1_pink	arpc4
serhl	0.00406394	0.114436	0.185	0.055	1	1_pink	serhl
si:ch211-213a13.5	0.004125	0.14414	0.185	0.056	1	1_pink	si:ch211-213a13.5
ubl7b	0.00419556	0.14414	0.148	0.039	1	1_pink	ubl7b
si:dkey-241l7.5	0.00422427	0.341454	0.111	0.024	1	1_pink	si:dkey-241l7.5
lgals2a	0.00426154	0.113609	0.074	0.012	1	1_pink	lgals2a
pfn2	0.00431102	0.355997	0.704	0.474	1	1_pink	pfn2
erap2	0.00433018	0.152873	0.222	0.076	1	1_pink	erap2
usp42	0.00433018	0.152873	0.222	0.076	1	1_pink	usp42
mrpl28	0.00438839	0.137835	0.185	0.055	1	1_pink	mrpl28
scamp2	0.00446744	0.24354	0.333	0.146	1	1_pink	scamp2
abhd18	0.00458227	0.123542	0.222	0.075	1	1_pink	abhd18
pkmyt1	0.00463621	0.15235	0.222	0.076	1	1_pink	pkmyt1
ascl1b	0.00464232	0.211187	0.296	0.123	1	1_pink	ascl1b
tomm6	0.00466417	0.17714	0.222	0.073	1	1_pink	tomm6
tsc22d11	0.00467703	0.325698	0.481	0.259	1	1_pink	tsc22d1
nt5c3a	0.00471991	0.150264	0.222	0.076	1	1_pink	nt5c3a
dnase1l1	0.00473289	0.125112	0.222	0.075	1	1_pink	dnase1l1
tram1	0.00473971	0.203262	0.185	0.058	1	1_pink	tram1
ip6k1	0.00474069	0.130591	0.148	0.04	1	1_pink	ip6k1
szrd1	0.0048006	0.27044	0.222	0.077	1	1_pink	szrd1
si:dkey-188i13.92	0.00487623	0.397883	0.296	0.121	1	1_pink	si:dkey-188i13.9
anxa11b	0.00488381	0.423013	0.444	0.261	1	1_pink	anxa11b
jak2a	0.00488749	0.162585	0.296	0.119	1	1_pink	jak2a
nudt2	0.00492731	0.151828	0.222	0.077	1	1_pink	nudt2
clta	0.00494628	0.247623	0.222	0.079	1	1_pink	clta
edem12	0.00502079	0.233374	0.556	0.297	1	1_pink	edem1
dffb	0.00514782	0.112835	0.185	0.057	1	1_pink	dffb
elp2	0.00518514	0.112302	0.185	0.057	1	1_pink	elp2
il10rb	0.00520566	0.186792	0.259	0.101	1	1_pink	il10rb
frs2b	0.00520783	0.171328	0.148	0.041	1	1_pink	frs2b
gpia1	0.0052853	0.155936	0.37	0.152	1	1_pink	gpia
gclm	0.00529847	0.110704	0.185	0.057	1	1_pink	gclm
soga11	0.00535113	0.223179	0.185	0.059	1	1_pink	soga1
pank4	0.00538939	0.102752	0.185	0.056	1	1_pink	pank4
si:dkey-21c1.1	0.00552455	0.121454	0.222	0.076	1	1_pink	si:dkey-21c1.1
pkig	0.00558712	0.404971	0.259	0.104	1	1_pink	pkig
gfm1	0.00559317	0.111769	0.185	0.058	1	1_pink	gfm1
uqcrh	0.00559538	0.298142	0.63	0.35	1	1_pink	uqcrh
si:ch211-246m6.5	0.00566532	0.20482	0.222	0.078	1	1_pink	si:ch211-246m6.5
timm29	0.00585523	0.149743	0.222	0.078	1	1_pink	timm29
HACD4	0.00596075	0.133916	0.296	0.118	1	1_pink	HACD4
phf11	0.00598511	0.278129	0.333	0.151	1	1_pink	phf11
ndufa10	0.0060048	0.161589	0.222	0.076	1	1_pink	ndufa10
brd2a	0.00604856	0.373514	0.407	0.2	1	1_pink	brd2a
tmem131	0.00605335	0.264525	0.407	0.191	1	1_pink	tmem131
hnrnpa0b2	0.00605964	0.336483	0.63	0.399	1	1_pink	hnrnpa0b
prkcea	0.00606739	0.110704	0.185	0.058	1	1_pink	prkcea
gatd3a	0.00615372	0.104286	0.111	0.025	1	1_pink	gatd3a
cox14	0.00620924	0.16708	0.148	0.041	1	1_pink	cox14
si:ch211-167b20.8	0.0065768	0.125717	0.148	0.042	1	1_pink	si:ch211-167b20.8
cyp2x12.12	0.00658974	0.178349	0.407	0.193	1	1_pink	cyp2x12.1
rab5if	0.00668481	0.105925	0.185	0.057	1	1_pink	rab5if
actl6a	0.00669904	0.25214	0.259	0.105	1	1_pink	actl6a
tra2a	0.00670233	0.305195	0.333	0.157	1	1_pink	tra2a
nfe2l3	0.00672521	0.154038	0.259	0.101	1	1_pink	nfe2l3
dnajc8	0.00676446	0.167337	0.185	0.059	1	1_pink	dnajc8
letm1	0.00691398	0.110172	0.185	0.059	1	1_pink	letm1
col18a1a	0.00692161	0.178336	0.074	0.013	1	1_pink	col18a1a
sdf2	0.00699831	0.104286	0.111	0.026	1	1_pink	sdf2
cct41	0.00701726	0.244659	0.556	0.305	1	1_pink	cct4
polr2f1	0.00703993	0.238154	0.222	0.081	1	1_pink	polr2f
gapvd1	0.00713357	0.137757	0.185	0.06	1	1_pink	gapvd1
nupl2	0.00715606	0.107516	0.185	0.059	1	1_pink	nupl2
rhoca	0.00725764	0.308363	0.37	0.178	1	1_pink	rhoca
baxb	0.00731731	0.126067	0.259	0.099	1	1_pink	baxb
ralba	0.00741433	0.118849	0.222	0.079	1	1_pink	ralba
ccz1	0.00744074	0.132765	0.111	0.027	1	1_pink	ccz1
tmed7	0.00764876	0.249239	0.444	0.224	1	1_pink	tmed7
lclat1	0.0076895	0.137006	0.333	0.145	1	1_pink	lclat1
mad1l1	0.0077685	0.125717	0.148	0.043	1	1_pink	mad1l1
mipol1	0.00784437	0.118849	0.222	0.08	1	1_pink	mipol1
tes	0.00787607	0.143606	0.148	0.043	1	1_pink	tes
vcam1b1	0.00789983	0.138818	0.148	0.043	1	1_pink	vcam1b
lrp12	0.00790264	0.197658	0.185	0.062	1	1_pink	lrp12
si:ch211-66k16.27	0.00793711	0.279976	0.259	0.108	1	1_pink	si:ch211-66k16.27
papola	0.00795907	0.147748	0.259	0.099	1	1_pink	papola
ubc3	0.00799098	0.352553	0.852	0.709	1	1_pink	ubc
mibp22	0.00804483	0.379025	0.593	0.391	1	1_pink	mibp2
mrpl362	0.00805834	0.185902	0.37	0.164	1	1_pink	mrpl36
ilf3b	0.00808091	0.175651	0.259	0.101	1	1_pink	ilf3b
zgc:1627303	0.00825129	0.507391	0.667	0.51	1	1_pink	zgc:162730
mov10a	0.00835871	0.174111	0.259	0.105	1	1_pink	mov10a
atp5f1b3	0.00838631	0.318025	0.815	0.637	1	1_pink	atp5f1b
eif1axa	0.00839164	0.13732	0.185	0.06	1	1_pink	eif1axa
mcl1a3	0.00849829	0.493281	0.852	0.773	1	1_pink	mcl1a
bin2b	0.00857037	0.161689	0.222	0.082	1	1_pink	bin2b
hnrnpr	0.00868702	0.218373	0.259	0.103	1	1_pink	hnrnpr
rhocb1	0.0086911	0.290792	0.37	0.181	1	1_pink	rhocb
dap3	0.00877608	0.113142	0.222	0.08	1	1_pink	dap3
eif4a3	0.00884713	0.233447	0.407	0.192	1	1_pink	eif4a3
mvp1	0.00886664	0.318298	0.333	0.164	1	1_pink	mvp
cct71	0.00898652	0.274066	0.593	0.351	1	1_pink	cct7
pcgf5b	0.00903103	0.104338	0.185	0.061	1	1_pink	pcgf5b
napsa1	0.00905718	0.192978	0.259	0.106	1	1_pink	napsa
retsatl	0.00918903	0.259879	0.185	0.06	1	1_pink	retsatl
ppig	0.00925114	0.184243	0.185	0.062	1	1_pink	ppig
cox5aa1	0.00928883	0.3568	0.593	0.393	1	1_pink	cox5aa
si:ch73-252i11.1	0.00961947	0.117289	0.222	0.082	1	1_pink	si:ch73-252i11.1
rer1	0.00972445	0.186006	0.222	0.083	1	1_pink	rer1
zgc:112052	0.00975331	0.14403	0.222	0.084	1	1_pink	zgc:112052
pcsk7	0.00979424	0.162849	0.185	0.064	1	1_pink	pcsk7
top1l	0.00984221	0.16177	0.407	0.188	1	1_pink	top1l
