# Supplementary material for: Single-cell transcriptome reveals insights into the development and function of the zebrafish ovary
Source: eLife. 2022 May 19;11:e76014. doi: 10.7554/eLife.76014 (PMC9191896; doi:10.7554/eLife.76014)
Supplement: Supplementary file 5. [file elife-76014-supp5.xlsx]

## Sheet: All Stromal Cells
	p_val	avg_logFC	pct.1	pct.2	p_val_adj	cluster	gene
tmem88b	0	1.0569	0.804	0.295	0	0	tmem88b
nid1b	1.15467e-289	0.877836	0.777	0.267	1.93626e-285	0	nid1b
plpp1a	1.11959e-264	0.928355	0.837	0.498	1.87744e-260	0	plpp1a
ndnf	1.79467e-206	0.841696	0.595	0.172	3.00947e-202	0	ndnf
cd81a	1.27003e-198	0.574316	0.927	0.766	2.12971e-194	0	cd81a
tfpia	4.65893e-196	0.733873	0.663	0.265	7.81256e-192	0	tfpia
podxl	3.97413e-187	0.865337	0.718	0.363	6.66422e-183	0	podxl
hsp70.2	8.07639e-168	1.05981	0.821	0.598	1.35433e-163	0	hsp70.2
akap12b	1.34854e-161	0.76843	0.574	0.215	2.26137e-157	0	akap12b
hsp70.1	6.42177e-145	1.04533	0.757	0.55	1.07687e-140	0	hsp70.1
il15	8.99862e-144	0.652131	0.508	0.184	1.50898e-139	0	il15
osr2	3.92299e-141	0.634069	0.512	0.185	6.57846e-137	0	osr2
cxcl14	5.05814e-135	0.738704	0.482	0.152	8.48199e-131	0	cxcl14
slc29a1a	9.33877e-131	0.625321	0.453	0.142	1.56602e-126	0	slc29a1a
hsp70.3	1.20694e-124	0.79916	0.801	0.605	2.02392e-120	0	hsp70.3
si:ch211-197h24.9	1.00739e-122	0.587717	0.511	0.218	1.6893e-118	0	si:ch211-197h24.9
cxcl12a	4.0686e-121	0.276142	0.538	0.237	6.82264e-117	0	cxcl12a
CR751602.2	7.4212e-120	0.545845	0.363	0.082	1.24446e-115	0	CR751602.2
ywhaz	5.76639e-110	0.520064	0.576	0.323	9.66966e-106	0	ywhaz
cd151	3.42456e-108	0.521264	0.413	0.14	5.74264e-104	0	cd151
vat1	1.31157e-107	0.655858	0.522	0.246	2.19937e-103	0	vat1
jam2b	1.82332e-107	0.560791	0.49	0.208	3.05753e-103	0	jam2b
fabp11a	5.98783e-104	0.536175	0.575	0.274	1.0041e-99	0	fabp11a
mhc1zba	1.74529e-103	0.41816	0.778	0.612	2.92668e-99	0	mhc1zba
hsp70l	3.08832e-103	1.07255	0.46	0.196	5.1788e-99	0	hsp70l
phc2a	3.82115e-97	0.610004	0.379	0.122	6.40769e-93	0	phc2a
entpd1	5.49335e-94	0.44529	0.421	0.158	9.2118e-90	0	entpd1
adma	1.25731e-93	0.789558	0.365	0.115	2.10839e-89	0	adma
CR383676.1	1.17057e-91	0.180033	1	0.973	1.96294e-87	0	CR383676.1
itm2bb	1.42923e-91	0.582626	0.421	0.174	2.39668e-87	0	itm2bb
nid2a	1.69742e-91	0.538544	0.434	0.187	2.84641e-87	0	nid2a
bmp4	7.02812e-90	0.368999	0.327	0.091	1.17855e-85	0	bmp4
eif4ebp3	1.32562e-88	0.500969	0.526	0.282	2.22294e-84	0	eif4ebp3
marcksl1a	2.4152e-86	0.246868	0.872	0.763	4.05005e-82	0	marcksl1a
col18a1a	1.56324e-84	0.512284	0.411	0.152	2.62139e-80	0	col18a1a
sall1a	3.1774e-80	0.25401	0.294	0.076	5.32818e-76	0	sall1a
nrxn1a	8.32948e-79	0.292231	0.266	0.06	1.39677e-74	0	nrxn1a
dnajb1b	1.00359e-76	0.565735	0.579	0.355	1.68292e-72	0	dnajb1b
si:ch211-222l21.1	1.34653e-76	0.336548	0.828	0.696	2.258e-72	0	si:ch211-222l21.1
axin2	3.18125e-74	0.27787	0.309	0.095	5.33463e-70	0	axin2
lin7a	5.47613e-74	0.252924	0.268	0.068	9.18292e-70	0	lin7a
tmem98	2.76129e-73	0.255612	0.367	0.141	4.6304e-69	0	tmem98
rab5b	2.76274e-73	0.293952	0.291	0.086	4.63284e-69	0	rab5b
cavin2b	1.53297e-72	0.54453	0.591	0.412	2.57064e-68	0	cavin2b
bnc2	1.83866e-72	0.278978	0.415	0.181	3.08325e-68	0	bnc2
ace	3.07957e-72	0.276661	0.286	0.082	5.16414e-68	0	ace
foxl2a	6.60819e-72	0.21431	0.264	0.066	1.10813e-67	0	foxl2a
ubb	2.82244e-71	0.643958	0.482	0.263	4.73295e-67	0	ubb
tspan18b	2.07952e-70	0.433905	0.37	0.165	3.48715e-66	0	tspan18b
pmp22a	3.00989e-70	0.198004	0.815	0.649	5.04729e-66	0	pmp22a
zeb2b	1.438e-69	0.236042	0.254	0.064	2.41138e-65	0	zeb2b
jun	3.6468e-69	0.38551	0.917	0.858	6.11532e-65	0	jun
ntd5	7.92553e-68	0.341375	0.4	0.174	1.32903e-63	0	ntd5
BX569787.1	7.46925e-67	0.444474	0.316	0.119	1.25252e-62	0	BX569787.1
epha4a	1.33409e-66	0.186846	0.216	0.042	2.23714e-62	0	epha4a
rock2b.1	4.76598e-66	0.233599	0.286	0.091	7.99207e-62	0	rock2b.1
itga9	1.49114e-65	0.246152	0.307	0.106	2.50049e-61	0	itga9
notum1b	1.12752e-64	0.371813	0.323	0.116	1.89073e-60	0	notum1b
junba	6.18602e-64	0.386925	0.903	0.848	1.03733e-59	0	junba
col27a1b	1.3108e-62	0.20381	0.269	0.082	2.19808e-58	0	col27a1b
rgmb	1.33776e-61	0.233352	0.304	0.111	2.24329e-57	0	rgmb
gpc4	1.1462e-59	0.26893	0.34	0.141	1.92206e-55	0	gpc4
abl2	6.98411e-59	0.202287	0.231	0.061	1.17117e-54	0	abl2
magi1b	2.36794e-58	0.208584	0.259	0.081	3.9708e-54	0	magi1b
aldh1a2	4.17e-57	0.353917	0.462	0.251	6.99267e-53	0	aldh1a2
ccbe1	4.60379e-57	0.19469	0.271	0.09	7.7201e-53	0	ccbe1
hsp90aa1.2	1.01192e-56	0.745374	0.407	0.215	1.6969e-52	0	hsp90aa1.2
adamts2	1.75836e-55	0.235551	0.337	0.145	2.9486e-51	0	adamts2
mao	1.1626e-54	0.194698	0.277	0.099	1.94956e-50	0	mao
btg1	3.29317e-53	0.323642	0.628	0.485	5.52231e-49	0	btg1
b3gnt5a	4.82651e-52	0.218989	0.277	0.105	8.09358e-48	0	b3gnt5a
ccn2a	7.26369e-52	0.699645	0.277	0.11	1.21805e-47	0	ccn2a
vwde	3.87156e-51	0.202413	0.267	0.096	6.49221e-47	0	vwde
f3b	2.26502e-49	0.6711	0.472	0.318	3.79821e-45	0	f3b
ssuh2rs1	5.15973e-49	0.170636	0.25	0.089	8.65236e-45	0	ssuh2rs1
gulp1a	5.67234e-49	0.268061	0.292	0.124	9.51194e-45	0	gulp1a
fzd2	1.0268e-48	0.188153	0.309	0.133	1.72183e-44	0	fzd2
tnfsf12	1.24507e-48	0.309176	0.375	0.194	2.08785e-44	0	tnfsf12
cd74b	4.01259e-48	0.511645	0.307	0.136	6.72871e-44	0	cd74b
c4	1.75358e-47	0.309795	0.324	0.147	2.94058e-43	0	c4
nr2f2	4.20373e-47	0.313854	0.388	0.217	7.04924e-43	0	nr2f2
nr0b1	6.58832e-47	0.200566	0.282	0.115	1.1048e-42	0	nr0b1
tjp2b	9.07674e-47	0.324939	0.295	0.134	1.52208e-42	0	tjp2b
pgrmc1	1.78181e-45	0.327957	0.427	0.261	2.98792e-41	0	pgrmc1
ftr82	4.28098e-45	0.242896	0.311	0.145	7.17877e-41	0	ftr82
pcdh7a	8.94612e-45	0.158028	0.189	0.053	1.50017e-40	0	pcdh7a
rsrp1	2.12942e-44	0.356188	0.341	0.182	3.57082e-40	0	rsrp1
dag1	2.08323e-43	0.338849	0.252	0.108	3.49338e-39	0	dag1
sik2b	2.46608e-43	0.159977	0.23	0.082	4.13537e-39	0	sik2b
apof	2.89927e-43	0.189754	0.193	0.057	4.86179e-39	0	apof
tnfaip6	1.0329e-42	0.15143	0.232	0.085	1.73208e-38	0	tnfaip6
aebp1	1.52246e-42	0.192012	0.386	0.206	2.55302e-38	0	aebp1
ccdc85ca	1.60743e-42	0.143395	0.182	0.052	2.6955e-38	0	ccdc85ca
gna12a	2.78005e-42	0.191896	0.272	0.116	4.66186e-38	0	gna12a
ccnd2a	6.12976e-42	0.3312	0.288	0.137	1.0279e-37	0	ccnd2a
jcada	7.42832e-42	0.166184	0.234	0.088	1.24566e-37	0	jcada
hspb1	9.50635e-41	0.496961	0.561	0.436	1.59412e-36	0	hspb1
nr2f1a	1.19615e-40	0.307381	0.336	0.185	2.00582e-36	0	nr2f1a
nme2b.1	2.37497e-40	0.202171	0.952	0.904	3.9826e-36	0	nme2b.1
nt5e	9.94859e-40	0.183197	0.202	0.07	1.66828e-35	0	nt5e
cebpd	8.922e-39	0.481941	0.42	0.271	1.49613e-34	0	cebpd
cd74a	9.87552e-39	0.490922	0.29	0.138	1.65603e-34	0	cd74a
ism1	1.53821e-38	0.153882	0.199	0.069	2.57943e-34	0	ism1
wls	1.72016e-38	0.298519	0.334	0.19	2.88454e-34	0	wls
ecm2	1.84948e-38	0.154768	0.241	0.099	3.10139e-34	0	ecm2
si:dkey-184p18.2	3.4648e-38	0.132796	0.118	0.019	5.81013e-34	0	si:dkey-184p18.2
ITLN1 (1 of many).1	1.36573e-37	0.212334	0.43	0.256	2.29019e-33	0	ITLN1 (1 of many).1
pdgfrl	1.74286e-37	0.136203	0.279	0.126	2.92261e-33	0	pdgfrl
sox4a.1	3.80886e-37	0.36444	0.317	0.175	6.38708e-33	0	sox4a.1
adamts9	7.8898e-37	0.148118	0.188	0.065	1.32304e-32	0	adamts9
mxra8a	2.5811e-36	0.246425	0.288	0.147	4.32824e-32	0	mxra8a
marcksl1b	5.43288e-36	0.257756	0.493	0.316	9.1104e-32	0	marcksl1b
vasnb	9.51937e-36	0.198318	0.2	0.075	1.5963e-31	0	vasnb
raver2	1.82646e-35	0.11688	0.167	0.052	3.0628e-31	0	raver2
arxa	2.86868e-35	0.1003	0.119	0.023	4.81049e-31	0	arxa
fibina	3.28503e-35	0.12706	0.163	0.05	5.50866e-31	0	fibina
sparc	4.09309e-35	0.129025	0.926	0.859	6.8637e-31	0	sparc
myca	6.18571e-35	0.260056	0.253	0.121	1.03728e-30	0	myca
bhlhe40	6.80382e-35	0.397649	0.428	0.294	1.14093e-30	0	bhlhe40
col12a1b	7.65032e-35	0.137235	0.191	0.069	1.28288e-30	0	col12a1b
egfra	3.83374e-34	0.271131	0.256	0.124	6.42879e-30	0	egfra
mfap2	4.13589e-34	0.234767	0.45	0.293	6.93548e-30	0	mfap2
si:dkey-56m19.5	8.13537e-34	0.316919	0.341	0.205	1.36422e-29	0	si:dkey-56m19.5
desi1a	2.1245e-33	0.103634	0.142	0.039	3.56258e-29	0	desi1a
cirbpb	2.37754e-33	0.269399	0.854	0.848	3.9869e-29	0	cirbpb
histh1l	2.70265e-33	0.434442	0.347	0.212	4.53207e-29	0	histh1l
wnt11r	8.52788e-33	0.14503	0.162	0.053	1.43004e-28	0	wnt11r
ugt1b5	1.75351e-32	0.154087	0.275	0.135	2.94047e-28	0	ugt1b5
greb1l	1.77864e-32	0.116658	0.165	0.055	2.9826e-28	0	greb1l
si:busm1-266f07.2	3.41674e-32	0.371963	0.152	0.048	5.72954e-28	0	si:busm1-266f07.2
c6.1	9.2826e-32	0.161631	0.575	0.431	1.5566e-27	0	c6.1
sox6	1.17535e-31	0.210679	0.248	0.122	1.97094e-27	0	sox6
dchs1a	2.76982e-31	0.121179	0.176	0.065	4.64471e-27	0	dchs1a
pleca	7.63619e-31	0.190267	0.377	0.23	1.28051e-26	0	pleca
caskin1	1.32532e-30	0.118993	0.15	0.048	2.22243e-26	0	caskin1
ddit3	1.3898e-30	0.40499	0.36	0.235	2.33055e-26	0	ddit3
ahnak	2.15677e-30	0.297323	0.502	0.387	3.61669e-26	0	ahnak
tbx2a	2.44947e-30	0.170927	0.194	0.08	4.10751e-26	0	tbx2a
sdc4	2.46208e-30	0.370707	0.578	0.511	4.12866e-26	0	sdc4
si:ch211-199g17.2	2.60413e-30	0.210443	0.151	0.052	4.36686e-26	0	si:ch211-199g17.2
tmem176l.1	2.90859e-30	0.234943	0.559	0.446	4.87741e-26	0	tmem176l.1
ifi46	5.61934e-30	0.33694	0.373	0.246	9.42308e-26	0	ifi46
antxr2a	6.05916e-30	0.156017	0.345	0.198	1.01606e-25	0	antxr2a
dkk3b	8.04785e-30	0.264983	0.391	0.264	1.34954e-25	0	dkk3b
BX537313.1	1.68183e-29	0.107973	0.096	0.017	2.82026e-25	0	BX537313.1
ptprk	1.81058e-29	0.157944	0.266	0.137	3.03617e-25	0	ptprk
egr1	1.81911e-29	0.309297	0.441	0.306	3.05047e-25	0	egr1
fam168a	4.86701e-29	0.131307	0.277	0.145	8.1615e-25	0	fam168a
hbegfa	8.82521e-29	0.31472	0.235	0.123	1.4799e-24	0	hbegfa
mgst3b	1.29533e-28	0.272701	0.407	0.302	2.17213e-24	0	mgst3b
ywhag1	2.38583e-28	0.140013	0.252	0.128	4.0008e-24	0	ywhag1
fosab	9.34526e-28	0.211891	0.913	0.893	1.56711e-23	0	fosab
colec11	9.36706e-28	0.306668	0.214	0.103	1.57076e-23	0	colec11
b2ml	9.70015e-28	0.196237	0.718	0.639	1.62662e-23	0	b2ml
btg2	1.57122e-27	0.257776	0.834	0.779	2.63477e-23	0	btg2
FRMD1	1.66975e-27	0.106175	0.154	0.056	2.8e-23	0	FRMD1
dpp3	5.66191e-27	0.201424	0.145	0.052	9.49445e-23	0	dpp3
kank2	6.9861e-27	0.122841	0.242	0.122	1.1715e-22	0	kank2
rhoq	1.10487e-26	0.103153	0.141	0.049	1.85276e-22	0	rhoq
cyp19a1a	1.17756e-26	0.387512	0.147	0.052	1.97464e-22	0	cyp19a1a
si:ch211-204c21.1.1	1.53582e-26	0.120576	0.207	0.096	2.57541e-22	0	si:ch211-204c21.1.1
rdh10a	2.16416e-26	0.14661	0.253	0.131	3.62908e-22	0	rdh10a
krt18b	2.73785e-26	0.296906	0.553	0.45	4.5911e-22	0	krt18b
eva1ba	6.15369e-26	0.134844	0.249	0.131	1.03191e-21	0	eva1ba
ngdn	6.2844e-26	0.233758	0.218	0.113	1.05383e-21	0	ngdn
slc43a2b	8.92939e-26	0.121227	0.161	0.064	1.49737e-21	0	slc43a2b
celf2	1.86932e-25	0.129654	0.291	0.165	3.13467e-21	0	celf2
lurap1	3.45699e-25	0.113291	0.199	0.092	5.79703e-21	0	lurap1
cdh2	5.80358e-25	0.204331	0.372	0.251	9.73203e-21	0	cdh2
dap1b	6.4978e-25	0.343167	0.267	0.159	1.08962e-20	0	dap1b
add3b	2.48379e-24	0.107515	0.192	0.09	4.16506e-20	0	add3b
HACD4	3.5187e-24	0.117383	0.241	0.128	5.9005e-20	0	HACD4
si:dkey-188i13.6	3.8215e-24	0.239926	0.192	0.093	6.40827e-20	0	si:dkey-188i13.6
phactr4a	3.12179e-23	0.123738	0.16	0.069	5.23493e-19	0	phactr4a
zgc:152791	3.37461e-23	0.301681	0.377	0.256	5.65888e-19	0	zgc:152791
klf6a	3.49176e-23	0.250881	0.563	0.475	5.85533e-19	0	klf6a
si:dkey-192g7.3	3.90789e-23	0.17088	0.193	0.094	6.55314e-19	0	si:dkey-192g7.3
lxn	6.85402e-23	0.160512	0.708	0.592	1.14935e-18	0	lxn
rhoab	2.13827e-22	0.293157	0.318	0.209	3.58566e-18	0	rhoab
si:ch211-196l7.4	3.55343e-22	0.303622	0.341	0.245	5.95874e-18	0	si:ch211-196l7.4
fibinb	3.76809e-22	0.137348	0.194	0.098	6.31871e-18	0	fibinb
h1f0	9.0769e-22	0.450122	0.48	0.401	1.52211e-17	0	h1f0
cnn2	1.47065e-21	0.248294	0.261	0.163	2.46614e-17	0	cnn2
fbln5	2.41965e-21	0.209182	0.264	0.159	4.05751e-17	0	fbln5
gsta.1	2.483e-21	0.125371	0.255	0.147	4.16374e-17	0	gsta.1
colec12	7.13941e-21	0.117046	0.296	0.18	1.19721e-16	0	colec12
jam3b	1.10129e-20	0.101013	0.262	0.15	1.84675e-16	0	jam3b
serpine3	2.06972e-20	0.102513	0.173	0.083	3.47071e-16	0	serpine3
tspan4a	3.32039e-20	0.172167	0.226	0.13	5.56796e-16	0	tspan4a
tob1b	3.59537e-20	0.334165	0.359	0.272	6.02907e-16	0	tob1b
mxra8b	5.35044e-20	0.118479	0.266	0.158	8.97216e-16	0	mxra8b
tcf12	1.81085e-19	0.195841	0.228	0.136	3.03661e-15	0	tcf12
snx17	2.42852e-19	0.111844	0.193	0.102	4.07239e-15	0	snx17
sorbs1	2.39051e-18	0.106323	0.217	0.123	4.00865e-14	0	sorbs1
h1fx	3.38083e-18	0.532527	0.341	0.251	5.66931e-14	0	h1fx
rsad2	5.74479e-18	0.192271	0.084	0.026	9.63343e-14	0	rsad2
enc1	9.94252e-18	0.174972	0.184	0.103	1.66726e-13	0	enc1
si:ch211-183d5.2	1.00336e-17	0.115787	0.118	0.049	1.68253e-13	0	si:ch211-183d5.2
bsg	1.56506e-17	0.217015	0.424	0.352	2.62444e-13	0	bsg
gas6	7.32781e-17	0.168332	0.207	0.123	1.2288e-12	0	gas6
timp2a	8.76714e-17	0.225586	0.301	0.221	1.47016e-12	0	timp2a
si:ch211-212k18.8	1.0095e-16	0.10748	0.293	0.191	1.69283e-12	0	si:ch211-212k18.8
fblim1	1.04343e-16	0.106738	0.244	0.149	1.74973e-12	0	fblim1
tgm1l1	2.76096e-16	0.105531	0.256	0.16	4.62985e-12	0	tgm1l1
emilin1a	2.94186e-16	0.125645	0.188	0.106	4.9332e-12	0	emilin1a
zgc:103700	2.97018e-16	0.170407	0.115	0.05	4.9807e-12	0	zgc:103700
si:dkey-7j14.6	3.67033e-16	0.184249	0.543	0.483	6.15478e-12	0	si:dkey-7j14.6
cst3	6.30626e-16	0.177594	0.479	0.411	1.0575e-11	0	cst3
xbp1	9.37012e-16	0.249362	0.314	0.23	1.57128e-11	0	xbp1
ier2b	1.08586e-15	0.316323	0.4	0.326	1.82089e-11	0	ier2b
maff	1.33698e-15	0.112486	0.213	0.129	2.24199e-11	0	maff
rpz5	2.03603e-15	0.284915	0.338	0.251	3.41422e-11	0	rpz5
mcl1b	2.44506e-15	0.178952	0.31	0.221	4.10012e-11	0	mcl1b
svild	2.62644e-15	0.175825	0.188	0.114	4.40428e-11	0	svild
tmem176	2.77072e-15	0.138245	0.348	0.252	4.64622e-11	0	tmem176
capns1b	7.12469e-15	0.212063	0.375	0.302	1.19474e-10	0	capns1b
atf4b	1.4934e-14	0.261062	0.368	0.304	2.50428e-10	0	atf4b
zgc:174863	1.67852e-14	0.175043	0.297	0.215	2.8147e-10	0	zgc:174863
dusp2	2.27629e-14	0.174773	0.245	0.157	3.81711e-10	0	dusp2
serpinb1	8.65029e-14	0.163929	0.23	0.156	1.45057e-09	0	serpinb1
antxr1c	1.53619e-13	0.155532	0.17	0.103	2.57604e-09	0	antxr1c
ppfibp1a	5.23267e-13	0.142921	0.131	0.072	8.77467e-09	0	ppfibp1a
boc	6.27673e-13	0.140832	0.358	0.277	1.05254e-08	0	boc
adipor2	1.0617e-12	0.156477	0.123	0.066	1.78037e-08	0	adipor2
cygb1	1.72554e-12	0.194831	0.263	0.182	2.89355e-08	0	cygb1
map2k6	2.25127e-12	0.142159	0.148	0.087	3.77515e-08	0	map2k6
clic4	2.6451e-12	0.143761	0.198	0.131	4.43556e-08	0	clic4
arrdc3b	3.76843e-12	0.215744	0.162	0.101	6.31927e-08	0	arrdc3b
mt-co3	6.59419e-12	0.119326	0.931	0.938	1.10578e-07	0	mt-co3
fstl3	1.20004e-11	0.15123	0.145	0.086	2.01234e-07	0	fstl3
b2m	1.6802e-11	0.189979	0.551	0.524	2.81753e-07	0	b2m
mt-co2	2.61011e-11	0.121963	0.906	0.914	4.3769e-07	0	mt-co2
slc38a5b	7.26585e-11	0.188051	0.287	0.231	1.21841e-06	0	slc38a5b
cd63	1.15378e-10	0.106785	0.518	0.448	1.93477e-06	0	cd63
hspe1	1.38287e-10	0.172521	0.17	0.11	2.31893e-06	0	hspe1
SERP1	1.40072e-10	0.195063	0.481	0.456	2.34886e-06	0	SERP1
CR936442.1	1.93364e-10	0.107072	0.06	0.023	3.24252e-06	0	CR936442.1
pbx4	3.78666e-10	0.137119	0.147	0.094	6.34985e-06	0	pbx4
itm2ba	5.57989e-10	0.140352	0.489	0.452	9.35691e-06	0	itm2ba
mknk2b	7.59635e-10	0.199884	0.209	0.153	1.27383e-05	0	mknk2b
anxa4	2.40476e-09	0.125533	0.394	0.356	4.03254e-05	0	anxa4
isg15	2.48384e-09	0.330577	0.154	0.101	4.16516e-05	0	isg15
actb1	4.44882e-09	0.25752	0.6	0.642	7.46022e-05	0	actb1
ier5	5.0688e-09	0.214561	0.349	0.3	8.49987e-05	0	ier5
zgc:110182	6.54756e-09	0.155649	0.137	0.089	0.000109796	0	zgc:110182
prelid3b	6.84106e-09	0.163498	0.196	0.14	0.000114718	0	prelid3b
s100v2	7.58203e-09	0.130496	0.416	0.355	0.000127143	0	s100v2
pabpc1b	9.42438e-09	0.186669	0.251	0.204	0.000158038	0	pabpc1b
qkia	1.21649e-08	0.167369	0.239	0.19	0.000203993	0	qkia
srsf5a	1.30424e-08	0.160018	0.35	0.305	0.000218709	0	srsf5a
fthl27	3.94499e-08	0.208909	0.356	0.315	0.000661535	0	fthl27
her9	4.53484e-08	0.242575	0.184	0.132	0.000760448	0	her9
f10	4.63879e-08	0.107348	0.226	0.171	0.000777878	0	f10
ccn1	8.72866e-08	0.217066	0.411	0.359	0.00146371	0	ccn1
h2afx1	9.42382e-08	0.303736	0.353	0.324	0.00158028	0	h2afx1
gadd45ga	1.1705e-07	0.118033	0.054	0.024	0.00196281	0	gadd45ga
h3f3b.1	1.30059e-07	0.132379	0.452	0.424	0.00218096	0	h3f3b.1
ecm1b	1.59148e-07	0.122469	0.114	0.071	0.00266876	0	ecm1b
pabpn1	1.79076e-07	0.163538	0.257	0.213	0.00300292	0	pabpn1
ppp1cb	6.09154e-07	0.111566	0.12	0.082	0.0102149	0	ppp1cb
tsc22d3	7.45448e-07	0.146818	0.13	0.09	0.0125004	0	tsc22d3
serpinh1b	1.32193e-06	0.210427	0.141	0.099	0.0221674	0	serpinh1b
cav1	4.83064e-06	0.114219	0.326	0.277	0.081005	0	cav1
hist2h2l	6.84055e-06	0.236666	0.199	0.164	0.114709	0	hist2h2l
si:ch73-46j18.5	7.15914e-06	0.131294	0.285	0.248	0.120052	0	si:ch73-46j18.5
prdx2	1.1045e-05	0.152471	0.404	0.396	0.185213	0	prdx2
ier2a	1.39353e-05	0.166431	0.39	0.365	0.233681	0	ier2a
dedd1	1.57152e-05	0.130458	0.252	0.216	0.263528	0	dedd1
cebpb	7.31793e-05	0.302964	0.291	0.265	1	0	cebpb
rnf213a	9.17882e-05	0.143817	0.18	0.148	1	0	rnf213a
stat1a	0.000222939	0.124676	0.179	0.15	1	0	stat1a
CT027638.1	0.00174981	0.107722	0.094	0.126	1	0	CT027638.1
ubc	0.00199566	0.145505	0.407	0.426	1	0	ubc
acta2	0	2.81417	0.771	0.092	0	1	acta2
csrp1b	0	2.16695	0.661	0.015	0	1	csrp1b
myl6	0	1.62894	0.664	0.09	0	1	myl6
myl9a	0	1.35562	0.666	0.1	0	1	myl9a
fhl1a	0	0.73808	0.442	0.016	0	1	fhl1a
tagln	8.91445e-298	2.85869	0.863	0.326	1.49486e-293	1	tagln
cald1b	2.40465e-288	0.452384	0.282	0.002	4.03236e-284	1	cald1b
kng1	3.47457e-281	0.644687	0.517	0.055	5.8265e-277	1	kng1
fhl2a	1.41153e-255	0.873447	0.62	0.108	2.367e-251	1	fhl2a
tpm2	6.69268e-254	0.780409	0.461	0.049	1.1223e-249	1	tpm2
myh11a	1.01029e-245	1.07941	0.565	0.088	1.69416e-241	1	myh11a
desmb	6.27808e-241	0.735805	0.26	0.005	1.05277e-236	1	desmb
mylkb	2.49166e-239	0.569045	0.421	0.04	4.17826e-235	1	mylkb
ckba	2.36207e-226	0.807391	0.478	0.064	3.96096e-222	1	ckba
krt91	8.76696e-222	1.56854	0.784	0.267	1.47013e-217	1	krt91
CU468917.1	4.81067e-213	0.92408	0.492	0.075	8.06702e-209	1	CU468917.1
tpm1	2.87012e-208	1.11722	0.661	0.157	4.8129e-204	1	tpm1
rims2a	1.23558e-204	0.321231	0.221	0.004	2.07195e-200	1	rims2a
pdlim3a	3.98494e-197	0.245844	0.224	0.006	6.68235e-193	1	pdlim3a
rplp0	2.4341e-187	0.508679	1	0.987	4.08174e-183	1	rplp0
rps2	7.25522e-184	0.45552	1	0.997	1.21663e-179	1	rps2
eef1a1l2	6.28812e-182	0.423662	1	0.998	1.05446e-177	1	eef1a1l2
bhmt	1.01847e-179	0.860702	0.598	0.151	1.70786e-175	1	bhmt
smtna	6.13511e-178	0.228075	0.191	0.003	1.0288e-173	1	smtna
rpl12	2.30271e-176	0.449097	1	0.989	3.86141e-172	1	rpl12
rps7	6.41416e-168	0.455303	1	0.994	1.07559e-163	1	rps7
rpl7a	8.95739e-163	0.451509	1	0.99	1.50206e-158	1	rpl7a
rpl19	4.77597e-162	0.419177	1	0.995	8.00883e-158	1	rpl19
rpl22l1	6.86507e-158	0.879241	0.909	0.585	1.1512e-153	1	rpl22l1
lmod1b	2.08883e-152	0.469688	0.462	0.087	3.50275e-148	1	lmod1b
bves	1.34525e-151	0.184238	0.174	0.004	2.25585e-147	1	bves
slc25a5	3.18987e-151	0.585711	1	0.926	5.3491e-147	1	slc25a5
rps24	1.0529e-150	0.408236	1	0.991	1.76561e-146	1	rps24
rpl17	7.9505e-150	0.431436	1	0.985	1.33322e-145	1	rpl17
rpl7	1.14206e-149	0.428292	1	0.992	1.91512e-145	1	rpl7
myl10	7.82318e-149	0.229501	0.159	0.003	1.31187e-144	1	myl10
rpl3	2.92268e-147	0.46966	0.998	0.961	4.90105e-143	1	rpl3
rplp1	6.79323e-147	0.412293	0.998	0.996	1.13916e-142	1	rplp1
rpl24	1.1936e-145	0.415532	1	0.99	2.00155e-141	1	rpl24
rpl13	1.77023e-144	0.409351	1	0.992	2.9685e-140	1	rpl13
rpl10a	3.4578e-144	0.416513	1	0.993	5.79839e-140	1	rpl10a
rps3a	1.98151e-141	0.401467	1	0.99	3.32279e-137	1	rps3a
tpt1	2.60668e-140	0.463849	1	0.971	4.37115e-136	1	tpt1
fbxl22	7.67731e-140	0.159614	0.148	0.002	1.28741e-135	1	fbxl22
si:dkey-151g10.6	5.29849e-138	0.407191	1	0.997	8.88504e-134	1	si:dkey-151g10.6
rpl9.1	1.47991e-137	0.422404	1	0.985	2.48166e-133	1	rpl9.1
eef1b2	2.46499e-136	0.565345	0.995	0.891	4.13353e-132	1	eef1b2
grem2b	1.75795e-135	0.194221	0.161	0.005	2.94791e-131	1	grem2b
ybx1	6.49956e-135	0.498603	0.998	0.957	1.08991e-130	1	ybx1
rpl18	1.44671e-132	0.403978	0.998	0.987	2.42599e-128	1	rpl18
rpl8	2.84858e-129	0.385718	0.998	0.989	4.77678e-125	1	rpl8
eef1g	3.0031e-128	0.463372	1	0.982	5.03589e-124	1	eef1g
rps6	4.55732e-126	0.464384	0.995	0.954	7.64218e-122	1	rps6
rpl23	4.8092e-126	0.382895	1	0.989	8.06454e-122	1	rpl23
rpl15	5.70419e-126	0.442	0.997	0.97	9.56536e-122	1	rpl15
rps12	2.15948e-124	0.414657	0.998	0.987	3.62124e-120	1	rps12
rps4x	1.96279e-123	0.432337	1	0.972	3.29141e-119	1	rps4x
rps18	1.11457e-122	0.500102	0.994	0.93	1.86901e-118	1	rps18
rpl13a	1.55626e-121	0.371644	1	0.99	2.6097e-117	1	rpl13a
gem	2.37009e-121	0.3968	0.142	0.004	3.9744e-117	1	gem
rps27a	7.83072e-121	0.346356	1	0.993	1.31313e-116	1	rps27a
rps5	6.58161e-120	0.385396	0.997	0.988	1.10367e-115	1	rps5
tpm4a	1.93054e-119	0.851321	0.7	0.316	3.23731e-115	1	tpm4a
rpl11	2.80822e-119	0.393597	1	0.98	4.7091e-115	1	rpl11
rpl18a	1.44517e-118	0.376446	0.998	0.988	2.42341e-114	1	rpl18a
rpl32	3.3621e-117	0.38265	1	0.989	5.6379e-113	1	rpl32
rps14	1.66898e-116	0.340174	1	0.991	2.79871e-112	1	rps14
ntn1a	1.73449e-116	0.190119	0.2	0.016	2.90856e-112	1	ntn1a
flna	3.88862e-116	0.763046	0.502	0.146	6.52083e-112	1	flna
rps8a	1.38675e-115	0.366885	1	0.987	2.32545e-111	1	rps8a
uba52	2.01572e-115	0.369362	1	0.984	3.38016e-111	1	uba52
rpl34	3.05542e-115	0.489906	0.995	0.926	5.12364e-111	1	rpl34
rpsa	3.45962e-115	0.373345	1	0.984	5.80143e-111	1	rpsa
rplp2l	1.23081e-114	0.473448	0.995	0.96	2.06395e-110	1	rplp2l
rps15a	1.56919e-114	0.372212	1	0.983	2.63137e-110	1	rps15a
rpl31	5.94387e-113	0.393907	1	0.983	9.96727e-109	1	rpl31
cox6b1	3.32165e-112	0.274934	0.216	0.021	5.57008e-108	1	cox6b1
rpl5a	3.91074e-112	0.569509	0.984	0.799	6.55793e-108	1	rpl5a
rpl21	4.54428e-112	0.362033	0.998	0.983	7.6203e-108	1	rpl21
rpl35	1.68913e-107	0.376664	0.998	0.984	2.83249e-103	1	rpl35
rps23	4.13124e-106	0.357763	1	0.978	6.92767e-102	1	rps23
naca	6.16547e-106	0.423631	0.997	0.947	1.03389e-101	1	naca
cox7a1	2.20493e-103	0.298208	0.263	0.038	3.69745e-99	1	cox7a1
rps9	5.64203e-103	0.336109	1	0.991	9.46111e-99	1	rps9
lmod1a	2.21407e-102	0.178851	0.159	0.011	3.71278e-98	1	lmod1a
stc2a	2.32692e-100	0.286408	0.218	0.026	3.90201e-96	1	stc2a
ppp1r12a	5.59988e-100	0.264949	0.194	0.02	9.39043e-96	1	ppp1r12a
rps16	4.61561e-98	0.331677	1	0.99	7.73991e-94	1	rps16
rpl30	4.97178e-98	0.371947	1	0.968	8.33718e-94	1	rpl30
rpl28	7.93469e-98	0.318597	0.998	0.992	1.33057e-93	1	rpl28
rps3	1.78892e-97	0.413739	0.994	0.934	2.99984e-93	1	rps3
ppp1r14aa	4.55253e-96	0.238407	0.174	0.015	7.63413e-92	1	ppp1r14aa
smtnb	5.0305e-96	0.159646	0.123	0.005	8.43564e-92	1	smtnb
cap2	1.15687e-95	0.140773	0.144	0.009	1.93995e-91	1	cap2
rps10	6.1247e-95	0.316895	1	0.991	1.02705e-90	1	rps10
rpl36a	6.23502e-95	0.355185	0.998	0.985	1.04555e-90	1	rpl36a
rps15	2.22739e-94	0.326717	1	0.989	3.73511e-90	1	rps15
mibp2	6.58617e-93	0.687034	0.685	0.376	1.10443e-88	1	mibp2
rps26l	9.75331e-93	0.365979	1	0.985	1.63553e-88	1	rps26l
rbm24a	7.4609e-92	0.310257	0.241	0.038	1.25112e-87	1	rbm24a
RPS17	5.20433e-91	0.357061	0.998	0.977	8.72714e-87	1	RPS17
rpl39	6.40451e-90	0.369618	1	0.986	1.07397e-85	1	rpl39
rpl5b	1.41978e-89	0.496246	0.948	0.722	2.38083e-85	1	rpl5b
tmem47	4.40189e-89	0.257601	0.2	0.025	7.38153e-85	1	tmem47
rps13	1.27415e-88	0.325122	0.997	0.988	2.13662e-84	1	rps13
rps11	1.37486e-87	0.298293	0.998	0.989	2.3055e-83	1	rps11
actb2	1.20923e-86	0.388017	1	0.996	2.02775e-82	1	actb2
rbpms2a	5.98306e-86	0.414939	0.38	0.097	1.0033e-81	1	rbpms2a
acta1b	4.38328e-85	0.16875	0.101	0.003	7.35032e-81	1	acta1b
rack1	8.84432e-83	0.373151	0.997	0.943	1.4831e-78	1	rack1
rpl10	3.92486e-79	0.293322	0.997	0.992	6.5816e-75	1	rpl10
rpl27	5.40353e-78	0.333388	0.998	0.965	9.06117e-74	1	rpl27
faua	2.24313e-77	0.322036	0.998	0.976	3.76151e-73	1	faua
rps19	3.23925e-77	0.30596	1	0.983	5.43189e-73	1	rps19
cdh11	7.33297e-77	0.263267	0.308	0.073	1.22967e-72	1	cdh11
pcdh10a	1.21516e-76	0.145916	0.153	0.016	2.03771e-72	1	pcdh10a
rps25	1.85951e-75	0.316921	1	0.973	3.11821e-71	1	rps25
actn1	3.72781e-75	0.311149	0.338	0.091	6.25116e-71	1	actn1
pfn1	2.41044e-73	0.388463	0.391	0.116	4.04207e-69	1	pfn1
trdn	4.94395e-72	0.103299	0.077	0.001	8.29051e-68	1	trdn
jpt1b	1.04558e-70	0.572886	0.637	0.332	1.75333e-66	1	jpt1b
rps28	3.95645e-69	0.347805	0.998	0.98	6.63457e-65	1	rps28
rpl23a	2.10242e-68	0.309528	0.998	0.97	3.52554e-64	1	rpl23a
fth1a	5.40107e-68	0.639881	0.528	0.232	9.05705e-64	1	fth1a
eef2b	1.43382e-66	0.413432	0.954	0.757	2.40437e-62	1	eef2b
mdh2	5.72976e-65	0.449632	0.412	0.141	9.60824e-61	1	mdh2
rpl35a	7.19659e-64	0.331658	0.997	0.963	1.2068e-59	1	rpl35a
rpl14	1.34915e-63	0.292096	1	0.98	2.26239e-59	1	rpl14
ppiaa	3.09895e-62	0.344948	0.992	0.919	5.19663e-58	1	ppiaa
rpl36	6.92202e-62	0.325251	0.994	0.953	1.16075e-57	1	rpl36
mdka	8.30032e-62	0.555222	0.538	0.236	1.39188e-57	1	mdka
RPL37A	1.02453e-60	0.309376	0.998	0.978	1.71803e-56	1	RPL37A
pde9a	2.63917e-60	0.110247	0.114	0.011	4.42562e-56	1	pde9a
glipr2l	1.4696e-59	0.173868	0.129	0.015	2.46438e-55	1	glipr2l
igf2a	1.52123e-58	0.239796	0.181	0.033	2.55094e-54	1	igf2a
rps26	3.17552e-58	0.324119	0.998	0.961	5.32503e-54	1	rps26
rpl37.1	4.95474e-57	0.294822	0.997	0.981	8.30861e-53	1	rpl37.1
rps27.1	1.44359e-56	0.284937	0.995	0.969	2.42076e-52	1	rps27.1
atp5mc3b	2.52428e-55	0.568331	0.521	0.252	4.23297e-51	1	atp5mc3b
rpl22	5.15068e-55	0.290502	0.997	0.958	8.63718e-51	1	rpl22
si:ch211-270g19.5	4.74124e-54	0.161509	0.26	0.067	7.95059e-50	1	si:ch211-270g19.5
rsl24d1	8.66023e-52	0.405082	0.833	0.637	1.45223e-47	1	rsl24d1
rps17	1.34282e-50	0.498364	0.691	0.464	2.25177e-46	1	rps17
cox8b	9.48686e-49	0.190122	0.18	0.038	1.59085e-44	1	cox8b
rpl4	4.66645e-47	0.432761	0.737	0.555	7.82517e-43	1	rpl4
btf3	5.09894e-47	0.33459	0.964	0.823	8.55042e-43	1	btf3
eif3f	2.65226e-46	0.429282	0.697	0.481	4.44757e-42	1	eif3f
hsp90ab1	2.84873e-45	0.242486	0.994	0.987	4.77703e-41	1	hsp90ab1
rpl38	8.53597e-45	0.30867	0.995	0.945	1.4314e-40	1	rpl38
rps29	1.00512e-44	0.281397	1	0.984	1.68549e-40	1	rps29
mdkb	2.49542e-44	0.122248	0.117	0.018	4.18457e-40	1	mdkb
nme2b.2	6.56753e-43	0.190446	0.095	0.011	1.10131e-38	1	nme2b.2
mdh1aa	9.79396e-43	0.14441	0.263	0.082	1.64235e-38	1	mdh1aa
cnot6l	2.56438e-42	0.150873	0.199	0.053	4.30021e-38	1	cnot6l
fn1b	3.48345e-42	0.325027	0.409	0.174	5.8414e-38	1	fn1b
cotl1	4.5046e-42	0.252602	0.358	0.137	7.55377e-38	1	cotl1
BX088707.3	9.92809e-42	0.204707	0.382	0.15	1.66484e-37	1	BX088707.3
eif3ha	2.21714e-41	0.323246	0.47	0.228	3.71793e-37	1	eif3ha
rps27.2	6.82951e-41	0.261692	0.992	0.915	1.14524e-36	1	rps27.2
slc25a3b	1.64848e-40	0.315156	0.382	0.156	2.76434e-36	1	slc25a3b
rpl29	6.60963e-40	0.354311	0.923	0.677	1.10837e-35	1	rpl29
nme3	7.2768e-40	0.185737	0.224	0.066	1.22025e-35	1	nme3
plaub	7.3377e-39	0.186313	0.192	0.053	1.23046e-34	1	plaub
zgc:122979	1.3542e-38	0.110978	0.074	0.007	2.27086e-34	1	zgc:122979
meis2b	3.07099e-38	0.120833	0.147	0.033	5.14974e-34	1	meis2b
adh5	1.50011e-37	0.398912	0.588	0.382	2.51553e-33	1	adh5
ptmaa	3.03128e-37	0.262606	0.532	0.281	5.08315e-33	1	ptmaa
zgc:153867	5.0554e-37	0.419573	0.692	0.468	8.47741e-33	1	zgc:153867
mylka	2.50864e-36	0.169573	0.254	0.089	4.20673e-32	1	mylka
ldhba	1.31815e-35	0.158592	0.186	0.051	2.21041e-31	1	ldhba
eif2s1b	6.05781e-35	0.261613	0.405	0.185	1.01583e-30	1	eif2s1b
eif4a1b	1.34973e-33	0.3923	0.563	0.371	2.26336e-29	1	eif4a1b
daam1a	2.85134e-33	0.192402	0.226	0.078	4.78141e-29	1	daam1a
eef1da	1.31548e-32	0.3546	0.806	0.641	2.20593e-28	1	eef1da
atp5f1b	5.65082e-32	0.312804	0.33	0.139	9.47587e-28	1	atp5f1b
rps21	5.22054e-31	0.251462	0.998	0.972	8.75432e-27	1	rps21
cd82a	2.43954e-30	0.139217	0.183	0.058	4.09086e-26	1	cd82a
fxyd1	7.47064e-30	0.340188	0.382	0.193	1.25275e-25	1	fxyd1
vdac1	7.71187e-30	0.237413	0.295	0.124	1.2932e-25	1	vdac1
idh2	1.0667e-29	0.169243	0.268	0.105	1.78875e-25	1	idh2
eif3i	1.4088e-29	0.212678	0.298	0.126	2.36241e-25	1	eif3i
si:dkey-239h2.3	1.97003e-29	0.226353	0.262	0.104	3.30354e-25	1	si:dkey-239h2.3
si:dkey-51e6.1	3.64049e-29	0.197844	0.285	0.12	6.10473e-25	1	si:dkey-51e6.1
cox6b2	5.97446e-29	0.382798	0.533	0.327	1.00186e-24	1	cox6b2
nsa2	9.43892e-29	0.330508	0.707	0.546	1.58281e-24	1	nsa2
inka1a	5.79886e-28	0.119753	0.3	0.126	9.72411e-24	1	inka1a
tmsb2	1.04924e-27	0.109831	0.101	0.022	1.75947e-23	1	tmsb2
hoxc3a	3.3801e-27	0.111309	0.147	0.043	5.66808e-23	1	hoxc3a
dnpep	3.56224e-27	0.108896	0.137	0.038	5.97353e-23	1	dnpep
boka	3.65482e-27	0.136137	0.15	0.045	6.12876e-23	1	boka
iscub	2.19819e-26	0.12691	0.128	0.034	3.68615e-22	1	iscub
vdac3	7.56205e-26	0.156541	0.273	0.115	1.26808e-21	1	vdac3
tmem119b	1.08482e-25	0.117685	0.226	0.088	1.81914e-21	1	tmem119b
CABZ01092746.1	1.15553e-25	0.116776	0.292	0.125	1.9377e-21	1	CABZ01092746.1
vdac2	3.62658e-25	0.332386	0.506	0.319	6.08142e-21	1	vdac2
atp5f1e	3.72344e-25	0.202423	0.256	0.106	6.24384e-21	1	atp5f1e
tpm4b	4.56489e-25	0.158607	0.24	0.101	7.65487e-21	1	tpm4b
ola1	5.25961e-25	0.253874	0.432	0.237	8.81983e-21	1	ola1
sorbs3	5.8388e-25	0.118339	0.134	0.039	9.79109e-21	1	sorbs3
pno1	1.01021e-24	0.198435	0.339	0.164	1.69402e-20	1	pno1
fhl3a	1.99692e-24	0.110441	0.158	0.052	3.34864e-20	1	fhl3a
cfl1	2.24214e-24	0.37697	0.503	0.314	3.75984e-20	1	cfl1
eef1db	2.96596e-24	0.311122	0.595	0.412	4.97361e-20	1	eef1db
rpl6	4.0292e-24	0.351075	0.628	0.454	6.75656e-20	1	rpl6
ppiab	5.83184e-24	0.34783	0.639	0.428	9.77941e-20	1	ppiab
pbxip1b	7.4279e-24	0.142817	0.197	0.074	1.24559e-19	1	pbxip1b
cct5	7.78768e-24	0.239159	0.315	0.153	1.30592e-19	1	cct5
eif3s6ip	1.12315e-23	0.196057	0.371	0.188	1.88341e-19	1	eif3s6ip
eif5a	1.4838e-23	0.269566	0.522	0.312	2.48819e-19	1	eif5a
cct8	1.57927e-23	0.135188	0.233	0.095	2.64828e-19	1	cct8
capza1b	4.09313e-23	0.12069	0.205	0.079	6.86376e-19	1	capza1b
rpl26	9.39227e-23	0.131137	0.192	0.073	1.57499e-18	1	rpl26
rplp2	1.15374e-22	0.208042	0.995	0.906	1.9347e-18	1	rplp2
vbp1	1.79236e-22	0.108008	0.137	0.043	3.00562e-18	1	vbp1
cct7	2.86146e-22	0.20937	0.273	0.127	4.79838e-18	1	cct7
COX5B	5.19959e-22	0.198225	0.265	0.118	8.7192e-18	1	COX5B
cavin1b	8.63071e-22	0.155697	0.233	0.1	1.44728e-17	1	cavin1b
cox5aa	7.39367e-20	0.137568	0.169	0.063	1.23984e-15	1	cox5aa
myo1ca	1.72883e-19	0.162222	0.224	0.105	2.89907e-15	1	myo1ca
cox4i1	3.5569e-19	0.268943	0.555	0.36	5.96457e-15	1	cox4i1
tmsb4x	5.14669e-19	0.195994	0.998	0.992	8.63049e-15	1	tmsb4x
cdc42ep3	7.38565e-19	0.11054	0.167	0.067	1.2385e-14	1	cdc42ep3
eif3c	7.57483e-19	0.141697	0.248	0.116	1.27022e-14	1	eif3c
atp5l	4.00983e-18	0.1697	0.298	0.15	6.72409e-14	1	atp5l
mprip	1.57881e-17	0.114561	0.134	0.05	2.6475e-13	1	mprip
ak1	1.82002e-17	0.102374	0.155	0.061	3.05198e-13	1	ak1
tomm5	3.37214e-17	0.182885	0.383	0.218	5.65474e-13	1	tomm5
eif2s3	8.7168e-17	0.238306	0.416	0.259	1.46172e-12	1	eif2s3
cct6a	1.57384e-16	0.227794	0.396	0.239	2.63917e-12	1	cct6a
atp5po	8.69437e-16	0.157655	0.257	0.133	1.45796e-11	1	atp5po
atp5f1c	1.30885e-15	0.115872	0.202	0.094	2.1948e-11	1	atp5f1c
naa10	2.09822e-15	0.124797	0.26	0.133	3.51851e-11	1	naa10
eno3	2.2924e-15	0.131394	0.189	0.085	3.84412e-11	1	eno3
gtpbp4	6.16156e-15	0.23016	0.388	0.248	1.03323e-10	1	gtpbp4
eif3g	1.47061e-14	0.233308	0.532	0.384	2.46606e-10	1	eif3g
ndufa4l	7.83134e-14	0.234823	0.527	0.372	1.31324e-09	1	ndufa4l
rsl1d1	1.87854e-13	0.138594	0.347	0.205	3.15013e-09	1	rsl1d1
zgc:193541	2.3821e-13	0.157377	0.281	0.157	3.99454e-09	1	zgc:193541
romo1	2.6327e-13	0.223968	0.683	0.546	4.41477e-09	1	romo1
eif3ea	4.82401e-13	0.220239	0.491	0.356	8.08939e-09	1	eif3ea
gyg1a	3.40376e-12	0.134796	0.096	0.036	5.70776e-08	1	gyg1a
eif3k	6.18829e-12	0.144162	0.344	0.212	1.03771e-07	1	eif3k
lxn1	8.86128e-12	0.246483	0.744	0.656	1.48595e-07	1	lxn
atp5fa1	8.938e-12	0.103001	0.205	0.106	1.49881e-07	1	atp5fa1
cox7b	4.33198e-11	0.142055	0.185	0.097	7.26429e-07	1	cox7b
irs2b	5.64722e-11	0.112617	0.166	0.085	9.46983e-07	1	irs2b
atp5pb	5.76598e-11	0.120533	0.26	0.147	9.66897e-07	1	atp5pb
cct2.1	8.36695e-11	0.138187	0.328	0.206	1.40305e-06	1	cct2.1
cox6c	9.68289e-11	0.132038	0.167	0.086	1.62372e-06	1	cox6c
eif3m	2.28895e-10	0.196269	0.569	0.423	3.83834e-06	1	eif3m
cct3	8.08402e-10	0.107554	0.235	0.137	1.35561e-05	1	cct3
gapdhs	2.2757e-09	0.112962	0.379	0.252	3.81613e-05	1	gapdhs
nop53	2.36718e-09	0.13056	0.434	0.296	3.96953e-05	1	nop53
atp6v0e1	1.28314e-08	0.137054	0.437	0.314	0.000215171	1	atp6v0e1
fabp3	5.52389e-08	0.107368	0.459	0.324	0.000926301	1	fabp3
pabpc1a	1.54659e-07	0.192667	0.598	0.48	0.00259348	1	pabpc1a
nme2b.11	4.15657e-07	0.134526	0.975	0.93	0.00697016	1	nme2b.1
lgals2a	1.10424e-06	0.189844	0.107	0.058	0.018517	1	lgals2a
ran	5.48941e-06	0.14349	0.517	0.384	0.092052	1	ran
sec61g	5.97944e-06	0.148385	0.678	0.57	0.100269	1	sec61g
h1m	6.05496e-06	0.200404	0.065	0.03	0.101536	1	h1m
myl9b	1.87119e-05	0.101471	0.45	0.344	0.313781	1	myl9b
cldnd	2.39434e-05	0.278401	0.117	0.071	0.401507	1	cldnd
rgs5a	0	1.58345	0.624	0.048	0	2	rgs5a
notch3	0	1.164	0.498	0.026	0	2	notch3
si:ch211-270g19.51	0	0.980739	0.559	0.045	0	2	si:ch211-270g19.5
rasl12	0	0.917611	0.429	0.003	0	2	rasl12
eva1bb	0	0.63029	0.468	0.014	0	2	eva1bb
tbx2b	0	0.603592	0.387	0.01	0	2	tbx2b
plp1b	0	0.60217	0.328	0.002	0	2	plp1b
mcamb	0	0.510001	0.353	0.007	0	2	mcamb
slc20a1a	2.61121e-286	0.403323	0.298	0.004	4.37874e-282	2	slc20a1a
rbpms2b	3.18056e-285	1.07886	0.458	0.031	5.33348e-281	2	rbpms2b
ndufa4l2a	6.64742e-274	0.682454	0.313	0.008	1.11471e-269	2	ndufa4l2a
epas1a	4.62075e-269	0.336413	0.279	0.004	7.74853e-265	2	epas1a
mef2cb	2.28807e-256	0.42127	0.321	0.011	3.83687e-252	2	mef2cb
AL954322.2	3.02779e-237	0.370666	0.284	0.008	5.0773e-233	2	AL954322.2
atp1a1b	2.29022e-236	0.429928	0.33	0.015	3.84048e-232	2	atp1a1b
sh3d21	9.75196e-233	0.447554	0.33	0.016	1.63531e-228	2	sh3d21
si:ch73-193i22.1	6.94466e-228	0.425174	0.286	0.01	1.16455e-223	2	si:ch73-193i22.1
rgs4	7.40683e-212	0.43693	0.324	0.018	1.24205e-207	2	rgs4
tspan18a	1.10876e-201	0.42455	0.273	0.011	1.85929e-197	2	tspan18a
rgs5b	9.09185e-196	1.65637	0.403	0.04	1.52461e-191	2	rgs5b
pcdh1b	9.35294e-194	0.23896	0.212	0.004	1.56839e-189	2	pcdh1b
prx	1.31765e-181	0.285636	0.185	0.002	2.20956e-177	2	prx
pcdh18a	4.59461e-176	0.730215	0.391	0.045	7.7047e-172	2	pcdh18a
tcf15	4.6128e-157	0.253422	0.212	0.009	7.73521e-153	2	tcf15
BX088707.31	4.63156e-157	1.08891	0.586	0.138	7.76667e-153	2	BX088707.3
BX901920.1	3.36036e-151	0.465719	0.158	0.002	5.63499e-147	2	BX901920.1
sorbs2b	7.53732e-149	0.225404	0.155	0.002	1.26393e-144	2	sorbs2b
tpm11	1.68882e-144	1.41954	0.616	0.177	2.83198e-140	2	tpm1
inka1a1	1.95473e-144	0.787663	0.519	0.11	3.27788e-140	2	inka1a
eva1a	1.74933e-141	0.213262	0.166	0.004	2.93345e-137	2	eva1a
ncaldb	2.54122e-141	0.226645	0.202	0.009	4.26138e-137	2	ncaldb
pgfb	1.71534e-140	0.217114	0.162	0.004	2.87646e-136	2	pgfb
ifitm1	2.99077e-138	0.626927	0.319	0.034	5.01522e-134	2	ifitm1
atp2a3	1.23136e-137	0.242764	0.204	0.01	2.06487e-133	2	atp2a3
crip1	4.07706e-134	0.953387	0.38	0.057	6.83683e-130	2	crip1
npr1b	4.1837e-134	0.152165	0.134	0.001	7.01564e-130	2	npr1b
TCIM (1 of many)	4.70493e-132	1.18486	0.181	0.008	7.88969e-128	2	TCIM (1 of many)
vegfc	2.06065e-130	0.238891	0.139	0.002	3.4555e-126	2	vegfc
htra3a	7.56155e-130	0.302554	0.206	0.012	1.268e-125	2	htra3a
kcne4	1.10227e-127	0.540229	0.223	0.016	1.84839e-123	2	kcne4
BX322618.1	3.26747e-127	0.339003	0.149	0.004	5.47923e-123	2	BX322618.1
si:dkey-27i16.2	5.20559e-124	0.382867	0.164	0.006	8.72925e-120	2	si:dkey-27i16.2
oaz2a	3.48808e-120	0.526678	0.374	0.065	5.84915e-116	2	oaz2a
adora2aa	1.24348e-117	0.149148	0.111	0.001	2.08519e-113	2	adora2aa
atp1b4	4.6758e-114	0.327455	0.252	0.026	7.84085e-110	2	atp1b4
ptmaa1	2.20506e-113	1.2692	0.666	0.276	3.69766e-109	2	ptmaa
zeb2a	5.80414e-113	0.661263	0.481	0.122	9.73296e-109	2	zeb2a
cxcl12b	1.04087e-112	1.25845	0.244	0.026	1.74543e-108	2	cxcl12b
pabpc4	5.94914e-111	0.220478	0.16	0.008	9.97612e-107	2	pabpc4
pkib	2.83294e-108	0.140066	0.105	0.001	4.75056e-104	2	pkib
ednraa	6.89722e-108	0.43008	0.359	0.065	1.15659e-103	2	ednraa
prr15la	1.207e-106	0.195885	0.095	0	2.02403e-102	2	prr15la
cldnb	1.3921e-105	0.828414	0.118	0.002	2.33442e-101	2	cldnb
agtr2	1.23123e-104	0.590007	0.382	0.079	2.06465e-100	2	agtr2
pklr	5.07463e-104	0.362418	0.107	0.001	8.50964e-100	2	pklr
pln	1.50984e-102	0.444139	0.187	0.014	2.53184e-98	2	pln
cldnh	5.40619e-102	0.747734	0.107	0.002	9.06565e-98	2	cldnh
si:dkey-33i11.9	1.3418e-101	0.294625	0.105	0.001	2.25006e-97	2	si:dkey-33i11.9
camk2d1	5.10569e-101	0.159176	0.145	0.007	8.56173e-97	2	camk2d1
arhgap36	3.9114e-100	0.16312	0.128	0.004	6.55903e-96	2	arhgap36
bik	2.74522e-99	0.230803	0.103	0.001	4.60345e-95	2	bik
BX248082.1	2.93006e-99	0.159947	0.113	0.003	4.91342e-95	2	BX248082.1
adra1bb	6.76587e-99	0.111718	0.099	0.001	1.13457e-94	2	adra1bb
jam3a	8.10619e-99	0.188148	0.155	0.009	1.35933e-94	2	jam3a
spdya	1.35661e-98	0.215232	0.118	0.003	2.2749e-94	2	spdya
arl4aa	4.13607e-95	0.220772	0.111	0.003	6.93578e-91	2	arl4aa
col4a1	8.5564e-93	0.718167	0.517	0.168	1.43482e-88	2	col4a1
myo1b	1.5323e-91	0.260312	0.225	0.027	2.56952e-87	2	myo1b
cdc42ep4a	1.89677e-91	0.127344	0.12	0.004	3.1807e-87	2	cdc42ep4a
camk2n1a	2.16495e-91	0.272711	0.176	0.015	3.6304e-87	2	camk2n1a
ebf3a	5.45348e-91	0.143032	0.132	0.006	9.14495e-87	2	ebf3a
rassf4	9.65859e-90	0.232868	0.185	0.017	1.61965e-85	2	rassf4
2020-09-15	2.00384e-89	0.377775	0.214	0.025	3.36023e-85	2	2020-09-15
en1b	8.86761e-89	0.134827	0.099	0.002	1.48701e-84	2	en1b
sgk2a	1.31887e-87	0.275944	0.101	0.002	2.21161e-83	2	sgk2a
pdlim2	1.41486e-86	0.267499	0.187	0.019	2.37258e-82	2	pdlim2
cdh17	6.35634e-86	0.46855	0.092	0.002	1.06589e-81	2	cdh17
si:ch211-139a5.9	2.36397e-84	1.0428	0.101	0.003	3.96414e-80	2	si:ch211-139a5.9
si:ch211-195b13.1	6.7731e-84	0.321517	0.162	0.014	1.13578e-79	2	si:ch211-195b13.1
prss35	2.64956e-83	0.552908	0.355	0.082	4.44305e-79	2	prss35
arhgap42a	3.95392e-83	0.202043	0.183	0.019	6.63033e-79	2	arhgap42a
rnd2	6.85733e-83	0.107761	0.086	0.001	1.14991e-78	2	rnd2
epas1b	4.49797e-82	0.430258	0.355	0.083	7.54265e-78	2	epas1b
fbp1b	2.12571e-81	0.415024	0.088	0.002	3.56461e-77	2	fbp1b
nck2b	4.59248e-81	0.34198	0.309	0.062	7.70113e-77	2	nck2b
nrarpa	6.44779e-80	0.341213	0.158	0.014	1.08123e-75	2	nrarpa
pag1	6.5671e-80	0.183841	0.153	0.013	1.10124e-75	2	pag1
atp1a1a.4	6.79458e-80	0.669093	0.09	0.002	1.13938e-75	2	atp1a1a.4
spint1a	1.09621e-78	0.215734	0.103	0.004	1.83823e-74	2	spint1a
ucp1	1.75075e-78	1.41044	0.082	0.001	2.93583e-74	2	ucp1
fhl3b	2.62741e-77	0.402844	0.359	0.088	4.4059e-73	2	fhl3b
stk17al	4.15271e-77	0.488438	0.242	0.04	6.96367e-73	2	stk17al
alkbh3.1	2.92135e-76	0.581932	0.261	0.046	4.89882e-72	2	alkbh3.1
lgals2b	4.68033e-76	1.44378	0.095	0.003	7.84845e-72	2	lgals2b
tmem45b	1.06393e-75	0.113988	0.076	0.001	1.7841e-71	2	tmem45b
agxta	2.1659e-75	0.179993	0.086	0.002	3.63199e-71	2	agxta
pdgfrb	1.21488e-74	0.933313	0.609	0.314	2.03723e-70	2	pdgfrb
snai1a	7.56474e-73	0.411724	0.231	0.038	1.26853e-68	2	snai1a
tmem119b1	3.34669e-72	0.430488	0.334	0.082	5.61206e-68	2	tmem119b
stard13a	8.88222e-71	0.12439	0.116	0.007	1.48946e-66	2	stard13a
pde5ab	1.41211e-70	0.105016	0.116	0.007	2.36796e-66	2	pde5ab
elf3	2.24424e-70	0.401137	0.086	0.003	3.76336e-66	2	elf3
mylka1	6.32034e-70	0.385938	0.338	0.086	1.05986e-65	2	mylka
arr3b	1.67508e-69	0.113186	0.097	0.004	2.80893e-65	2	arr3b
col4a2	3.8567e-69	0.541109	0.433	0.143	6.4673e-65	2	col4a2
rem1	4.0025e-69	0.3173	0.214	0.033	6.7118e-65	2	rem1
malb	9.54561e-69	0.333973	0.065	0	1.6007e-64	2	malb
flrt3	1.66644e-68	0.227784	0.191	0.027	2.79445e-64	2	flrt3
angptl2b	1.83528e-66	0.230391	0.197	0.029	3.07758e-62	2	angptl2b
pdzk1	1.94985e-66	0.378098	0.063	0	3.2697e-62	2	pdzk1
g6pca.2	2.02932e-66	0.207308	0.065	0.001	3.40297e-62	2	g6pca.2
epcam	5.92654e-64	0.817613	0.172	0.023	9.93821e-60	2	epcam
spint2	4.96014e-63	0.257589	0.116	0.009	8.31766e-59	2	spint2
kctd12.2	1.9359e-62	0.513336	0.284	0.067	3.24631e-58	2	kctd12.2
CU682777.2	4.58974e-62	0.207628	0.074	0.002	7.69654e-58	2	CU682777.2
SMIM22	1.17487e-61	0.219591	0.103	0.007	1.97014e-57	2	SMIM22
s1pr1	1.95579e-61	0.150043	0.101	0.006	3.27966e-57	2	s1pr1
fxyd6l	3.8448e-61	0.929281	0.487	0.212	6.44735e-57	2	fxyd6l
pdzk1ip1	5.30414e-61	0.286426	0.069	0.002	8.89452e-57	2	pdzk1ip1
cables2b	8.23363e-61	0.137836	0.111	0.009	1.3807e-56	2	cables2b
pvalb9	1.3233e-60	1.08737	0.067	0.001	2.21905e-56	2	pvalb9
gapdh	1.86401e-60	0.940474	0.16	0.021	3.12575e-56	2	gapdh
ppp1r3cb	5.15328e-60	0.228168	0.181	0.027	8.64154e-56	2	ppp1r3cb
gadd45ab	6.25815e-60	0.531753	0.231	0.046	1.04943e-55	2	gadd45ab
pnp6	1.40454e-59	0.308275	0.055	0	2.35527e-55	2	pnp6
tm4sf4	1.9953e-59	0.213715	0.057	0	3.34592e-55	2	tm4sf4
hpca	1.21605e-58	0.153156	0.143	0.017	2.03919e-54	2	hpca
si:dkey-194e6.1	2.53351e-58	0.622503	0.071	0.002	4.24844e-54	2	si:dkey-194e6.1
myh11a1	7.94484e-58	0.563421	0.384	0.12	1.33227e-53	2	myh11a
tmem176l.4	2.6293e-57	0.132739	0.059	0.001	4.40907e-53	2	tmem176l.4
c1qtnf5	3.339e-57	0.323593	0.33	0.092	5.59916e-53	2	c1qtnf5
pkp3a	1.58355e-56	0.129381	0.082	0.004	2.65545e-52	2	pkp3a
hey2	5.40091e-56	0.145035	0.078	0.003	9.05678e-52	2	hey2
zgc:92630	3.48283e-55	0.23903	0.084	0.005	5.84036e-51	2	zgc:92630
agxtb	7.12648e-55	0.292326	0.055	0.001	1.19504e-50	2	agxtb
grhprb	7.24802e-55	0.220867	0.055	0.001	1.21542e-50	2	grhprb
si:dkey-61f9.1.1	8.1751e-55	0.210437	0.055	0.001	1.37088e-50	2	si:dkey-61f9.1.1
si:ch211-195m9.3	3.70839e-53	0.376464	0.212	0.044	6.2186e-49	2	si:ch211-195m9.3
sorbs31	7.3901e-53	0.214526	0.195	0.036	1.23925e-48	2	sorbs3
ftcd	9.44997e-53	0.215606	0.055	0.001	1.58467e-48	2	ftcd
rida	6.48882e-52	0.579505	0.097	0.008	1.08811e-47	2	rida
rbpms2a1	3.24828e-49	0.539228	0.332	0.111	5.44704e-45	2	rbpms2a
upb1	6.41907e-49	0.1017	0.061	0.002	1.07641e-44	2	upb1
cnnm2b	7.07721e-49	0.127935	0.12	0.014	1.18678e-44	2	cnnm2b
cox5b2	9.81897e-49	0.199949	0.097	0.009	1.64654e-44	2	cox5b2
agr2	2.68696e-48	0.398016	0.076	0.004	4.50577e-44	2	agr2
col18a1b	3.16235e-48	0.139364	0.059	0.002	5.30294e-44	2	col18a1b
eps8l3a	1.10719e-47	0.102095	0.057	0.002	1.85665e-43	2	eps8l3a
ahcyl1	1.6689e-47	0.22791	0.101	0.01	2.79857e-43	2	ahcyl1
cnn3a	1.00256e-46	0.403968	0.296	0.092	1.6812e-42	2	cnn3a
gpd1b	1.93993e-46	0.18421	0.074	0.004	3.25307e-42	2	gpd1b
mt2	3.24281e-46	1.16028	0.158	0.028	5.43786e-42	2	mt2
tnks1bp1	9.64497e-46	0.205564	0.099	0.01	1.61736e-41	2	tnks1bp1
cxcl12a1	1.13297e-45	0.722706	0.116	0.459	1.89988e-41	2	cxcl12a
anks1b	1.53181e-45	0.161409	0.155	0.027	2.56869e-41	2	anks1b
krt97	1.64192e-45	0.90313	0.055	0.002	2.75334e-41	2	krt97
krt5	1.78578e-45	1.97003	0.076	0.005	2.99457e-41	2	krt5
si:dkey-87o1.2	1.79206e-45	0.117193	0.069	0.004	3.0051e-41	2	si:dkey-87o1.2
dusp1	1.87005e-45	0.579347	0.303	0.098	3.13589e-41	2	dusp1
im:7152348	3.16574e-45	0.311063	0.227	0.056	5.30863e-41	2	im:7152348
aplnra	6.78006e-45	0.200553	0.124	0.017	1.13695e-40	2	aplnra
s1pr5a	8.27391e-45	0.240079	0.216	0.052	1.38745e-40	2	s1pr5a
vegfaa	2.57135e-44	0.388503	0.313	0.101	4.31189e-40	2	vegfaa
st3gal7	3.27117e-44	0.15127	0.09	0.008	5.48542e-40	2	st3gal7
her6	5.69079e-44	1.30682	0.521	0.273	9.54288e-40	2	her6
si:ch211-79k12.1	6.69591e-44	0.230485	0.113	0.014	1.12284e-39	2	si:ch211-79k12.1
calm2a	1.62426e-43	0.712519	0.389	0.17	2.72372e-39	2	calm2a
ppp1r14aa1	2.51317e-43	0.241327	0.141	0.023	4.21433e-39	2	ppp1r14aa
anpepb	2.59846e-43	0.13175	0.053	0.002	4.35736e-39	2	anpepb
prr13	1.13606e-42	0.182737	0.113	0.015	1.90506e-38	2	prr13
pah	1.3819e-42	0.248367	0.059	0.003	2.3173e-38	2	pah
ugt1a7	4.0875e-42	0.131122	0.103	0.012	6.85432e-38	2	ugt1a7
zgc:162989	8.15351e-42	0.140547	0.065	0.004	1.36726e-37	2	zgc:162989
btbd6a	1.7992e-41	0.124286	0.107	0.013	3.01707e-37	2	btbd6a
CABZ01044746.1	1.83289e-41	0.200453	0.141	0.024	3.07357e-37	2	CABZ01044746.1
si:dkey-193p11.2	1.31041e-40	1.27463	0.057	0.003	2.19743e-36	2	si:dkey-193p11.2
idh1	3.48314e-40	0.228062	0.092	0.01	5.84087e-36	2	idh1
acy3.2	7.91298e-40	0.242053	0.065	0.004	1.32693e-35	2	acy3.2
aldob	1.08089e-39	1.75393	0.216	0.061	1.81255e-35	2	aldob
si:ch211-201h21.5	4.96915e-39	0.171	0.053	0.002	8.33278e-35	2	si:ch211-201h21.5
si:dkey-262k9.2	9.47745e-39	0.140196	0.065	0.004	1.58927e-34	2	si:dkey-262k9.2
oclna	9.64826e-39	0.133134	0.078	0.007	1.61792e-34	2	oclna
ptbp1b	4.70704e-38	0.194089	0.145	0.028	7.89323e-34	2	ptbp1b
sgk1	1.09129e-37	0.180249	0.116	0.018	1.82998e-33	2	sgk1
rassf1	1.95406e-37	0.228597	0.212	0.058	3.27677e-33	2	rassf1
sept8a	2.66409e-37	0.230329	0.164	0.036	4.46742e-33	2	sept8a
il13ra1	3.4538e-37	0.196105	0.185	0.045	5.79168e-33	2	il13ra1
tnfrsf11b	3.73238e-37	0.412478	0.057	0.003	6.25883e-33	2	tnfrsf11b
zak	8.48027e-37	0.122022	0.116	0.018	1.42206e-32	2	zak
hnf1bb	4.88803e-36	0.148808	0.059	0.004	8.19674e-32	2	hnf1bb
cd9b	6.00631e-36	0.162758	0.084	0.009	1.0072e-31	2	cd9b
zgc:165573	1.16499e-35	0.110629	0.069	0.006	1.95357e-31	2	zgc:165573
slc11a2	1.18371e-35	0.133161	0.095	0.012	1.98497e-31	2	slc11a2
sost	3.52644e-35	0.326813	0.193	0.051	5.91348e-31	2	sost
sephs2	3.65647e-35	0.11921	0.071	0.007	6.13154e-31	2	sephs2
cyp4t8	3.6968e-35	0.31275	0.061	0.004	6.19916e-31	2	cyp4t8
rasl11a	1.08429e-34	0.193221	0.197	0.053	1.81824e-30	2	rasl11a
cd248a	1.31014e-34	0.543489	0.532	0.327	2.19697e-30	2	cd248a
sox13	1.42209e-34	0.10165	0.071	0.007	2.3847e-30	2	sox13
CR753876.1	2.21469e-34	0.150679	0.084	0.01	3.71382e-30	2	CR753876.1
bgnb	8.26666e-34	0.124306	0.107	0.017	1.38624e-29	2	bgnb
sik1	2.31058e-33	0.357373	0.214	0.064	3.8746e-29	2	sik1
fosb	3.32483e-33	0.793037	0.681	0.45	5.57541e-29	2	fosb
gdpd2	1.15758e-30	0.132434	0.076	0.009	1.94115e-26	2	gdpd2
dhrs3b	1.46186e-30	0.297134	0.275	0.102	2.45139e-26	2	dhrs3b
cfap45	4.09663e-30	0.115756	0.101	0.017	6.86964e-26	2	cfap45
pear1	4.69487e-30	0.120165	0.13	0.028	7.87283e-26	2	pear1
htatip2	8.85173e-30	0.133969	0.141	0.032	1.48435e-25	2	htatip2
vcam1b	1.17317e-29	0.401811	0.345	0.159	1.96728e-25	2	vcam1b
zgc:153284	1.28759e-29	0.110039	0.055	0.004	2.15916e-25	2	zgc:153284
gclc	9.55396e-29	0.116775	0.071	0.009	1.6021e-24	2	gclc
lnx2b	1.00875e-28	0.112569	0.082	0.012	1.69157e-24	2	lnx2b
gcshb	2.24277e-28	0.152077	0.076	0.01	3.76091e-24	2	gcshb
prnprs3	2.41976e-28	0.122011	0.124	0.027	4.0577e-24	2	prnprs3
lama4	3.52864e-28	0.388338	0.363	0.18	5.91717e-24	2	lama4
dnase1l4.2	8.69015e-28	0.102661	0.074	0.01	1.45725e-23	2	dnase1l4.2
zgc:153911	1.98966e-27	0.265686	0.065	0.008	3.33646e-23	2	zgc:153911
tdh	6.25956e-27	0.374113	0.147	0.039	1.04967e-22	2	tdh
tril	2.88042e-26	0.165217	0.183	0.056	4.83017e-22	2	tril
ebf1b	3.9351e-26	0.143378	0.164	0.047	6.59877e-22	2	ebf1b
iscub1	6.9831e-26	0.202604	0.139	0.036	1.171e-21	2	iscub
dusp6	1.15068e-25	0.129131	0.128	0.031	1.92957e-21	2	dusp6
nr4a1	1.21127e-25	0.254116	0.09	0.016	2.03118e-21	2	nr4a1
ldhba1	2.87521e-25	0.428963	0.176	0.056	4.82144e-21	2	ldhba
slc25a51	5.62696e-25	0.375391	0.977	0.93	9.43585e-21	2	slc25a5
ak11	6.71542e-25	0.238839	0.185	0.061	1.12611e-20	2	ak1
vasna	1.40526e-24	0.154454	0.174	0.055	2.35647e-20	2	vasna
uqcrc2b	2.1746e-24	0.101082	0.084	0.015	3.64658e-20	2	uqcrc2b
nav3	2.6633e-24	0.100228	0.105	0.023	4.46609e-20	2	nav3
wu:fj16a03	4.62459e-24	0.46674	0.109	0.025	7.75498e-20	2	wu:fj16a03
ptenb	1.09842e-23	0.266561	0.298	0.138	1.84193e-19	2	ptenb
glud1b	1.80053e-23	0.180414	0.092	0.019	3.01931e-19	2	glud1b
mcl1a	2.56585e-23	0.704011	0.489	0.297	4.30268e-19	2	mcl1a
selenop	4.97688e-23	0.629721	0.641	0.492	8.34573e-19	2	selenop
phc2b	6.59801e-23	0.207921	0.176	0.059	1.10642e-18	2	phc2b
pxna	6.6886e-23	0.140636	0.095	0.02	1.12161e-18	2	pxna
jdp2b	9.03972e-23	0.71044	0.7	0.462	1.51587e-18	2	jdp2b
fetub	9.37413e-23	0.707861	0.053	0.006	1.57195e-18	2	fetub
hmgn3	2.27194e-22	0.126038	0.128	0.034	3.80981e-18	2	hmgn3
zgc:153317	2.32631e-22	0.435626	0.065	0.01	3.90099e-18	2	zgc:153317
ndrg1a	2.6175e-22	0.233677	0.092	0.019	4.38928e-18	2	ndrg1a
slc16a9a	3.47219e-22	0.196732	0.059	0.008	5.82252e-18	2	slc16a9a
pdgfab	3.55429e-22	0.129509	0.147	0.044	5.96019e-18	2	pdgfab
pim1	4.12309e-22	0.449452	0.363	0.188	6.91401e-18	2	pim1
LO018188.1	4.73747e-22	0.133895	0.128	0.035	7.94426e-18	2	LO018188.1
ccl25b	6.54299e-22	0.518426	0.328	0.163	1.09719e-17	2	ccl25b
msrb1a	1.08319e-21	0.122154	0.057	0.008	1.8164e-17	2	msrb1a
cox5aa1	1.21882e-21	0.315335	0.183	0.065	2.04384e-17	2	cox5aa
ppiab1	1.62839e-21	0.403865	0.595	0.439	2.73065e-17	2	ppiab
uqcrc2a	1.64126e-21	0.105972	0.082	0.016	2.75223e-17	2	uqcrc2a
si:ch211-198c19.3	2.44615e-21	0.414371	0.263	0.119	4.10194e-17	2	si:ch211-198c19.3
serpine1	3.08934e-21	0.164494	0.071	0.012	5.18052e-17	2	serpine1
cldnd1	3.64318e-21	0.692342	0.181	0.066	6.10924e-17	2	cldnd
cldn7b	6.46956e-21	0.11101	0.069	0.012	1.08488e-16	2	cldn7b
afap1l2	7.35083e-21	0.155497	0.189	0.069	1.23266e-16	2	afap1l2
rbm47	9.13791e-21	0.144391	0.076	0.014	1.53234e-16	2	rbm47
cyb5a	2.74023e-20	0.119411	0.103	0.025	4.59509e-16	2	cyb5a
slc3a2a	3.04991e-20	0.226057	0.055	0.008	5.11439e-16	2	slc3a2a
lmo4a	4.39863e-20	0.108232	0.126	0.036	7.37607e-16	2	lmo4a
phlda2	7.63224e-20	0.500329	0.092	0.021	1.27985e-15	2	phlda2
sh3bgrl3	8.02712e-20	0.15833	0.162	0.055	1.34607e-15	2	sh3bgrl3
gstt1a	1.14059e-19	0.604094	0.092	0.022	1.91265e-15	2	gstt1a
apoeb	1.25065e-19	0.81051	0.057	0.009	2.09722e-15	2	apoeb
slc20a1b	1.26392e-19	0.185558	0.092	0.022	2.11947e-15	2	slc20a1b
eps8a	2.03937e-19	0.108423	0.126	0.037	3.41982e-15	2	eps8a
sod1	3.21716e-19	0.352299	0.206	0.084	5.39486e-15	2	sod1
fam107b	3.37779e-19	0.117211	0.147	0.047	5.66421e-15	2	fam107b
atp5mc1	3.86744e-19	0.221645	0.113	0.031	6.48531e-15	2	atp5mc1
sqstm1	5.97709e-19	0.213631	0.16	0.056	1.0023e-14	2	sqstm1
tpi1b	6.46853e-19	0.23623	0.128	0.039	1.08471e-14	2	tpi1b
id2a	7.97805e-19	0.342575	0.193	0.077	1.33784e-14	2	id2a
thy1	9.4064e-19	0.431432	0.086	0.02	1.57736e-14	2	thy1
cdh1	1.20058e-18	0.111099	0.076	0.015	2.01325e-14	2	cdh1
suclg1	2.31226e-18	0.242208	0.113	0.033	3.87743e-14	2	suclg1
selenou1a	3.75009e-18	0.10269	0.097	0.025	6.28853e-14	2	selenou1a
rtn1a	5.14541e-18	0.167374	0.195	0.08	8.62833e-14	2	rtn1a
zgc:173856	5.29729e-18	0.281541	0.084	0.02	8.88302e-14	2	zgc:173856
inhbb	5.98876e-18	0.133352	0.099	0.026	1.00425e-13	2	inhbb
fosab1	1.38227e-17	0.489847	0.952	0.901	2.31794e-13	2	fosab
mt-co1	2.0517e-17	0.323611	0.954	0.851	3.4405e-13	2	mt-co1
parvab	3.23391e-17	0.163621	0.25	0.117	5.42294e-13	2	parvab
cyp1c2	3.76943e-17	0.16525	0.088	0.022	6.32096e-13	2	cyp1c2
sult6b1	5.4638e-17	0.162301	0.164	0.062	9.16225e-13	2	sult6b1
mprip1	6.07827e-17	0.132332	0.145	0.051	1.01926e-12	2	mprip
lamb1b	9.52151e-17	0.261276	0.309	0.172	1.59666e-12	2	lamb1b
slc7a2	1.00083e-16	0.10193	0.12	0.038	1.67829e-12	2	slc7a2
capgb	1.14169e-16	0.135534	0.059	0.011	1.9145e-12	2	capgb
zp2.5	1.46073e-16	0.403866	0.095	0.026	2.44949e-12	2	zp2.5
ckbb	1.73805e-16	0.207964	0.076	0.017	2.91453e-12	2	ckbb
zfhx3	1.88429e-16	0.146921	0.158	0.059	3.15977e-12	2	zfhx3
dhrs11b	2.21465e-16	0.153465	0.099	0.028	3.71375e-12	2	dhrs11b
calm1b	2.35156e-16	0.110329	0.137	0.048	3.94333e-12	2	calm1b
gchfr	2.74284e-16	0.132518	0.143	0.052	4.59947e-12	2	gchfr
neurl1b	2.79427e-16	0.104469	0.105	0.031	4.68571e-12	2	neurl1b
ctsz	3.7469e-16	0.181381	0.065	0.013	6.28318e-12	2	ctsz
slc12a2	4.36356e-16	0.158139	0.147	0.055	7.31726e-12	2	slc12a2
sdha	4.55195e-16	0.104852	0.084	0.021	7.63317e-12	2	sdha
h3f3b.1.2	4.96596e-16	0.171584	0.168	0.066	8.32742e-12	2	h3f3b.1.2
msra	5.05565e-16	0.115929	0.074	0.017	8.47782e-12	2	msra
pgk1	7.11614e-16	0.158911	0.124	0.042	1.1933e-11	2	pgk1
cth	7.17942e-16	0.158041	0.067	0.015	1.20392e-11	2	cth
si:dkey-241l7.2	7.71489e-16	0.56575	0.071	0.016	1.29371e-11	2	si:dkey-241l7.2
kyat1	1.44103e-15	0.123628	0.063	0.013	2.41647e-11	2	kyat1
zgc:101744	1.55128e-15	0.119737	0.065	0.014	2.60134e-11	2	zgc:101744
tuba8l2	1.55582e-15	0.220636	0.164	0.069	2.60895e-11	2	tuba8l2
zgc:172121	1.57213e-15	0.132491	0.059	0.012	2.63631e-11	2	zgc:172121
dclk1a	1.82455e-15	0.178505	0.214	0.098	3.05959e-11	2	dclk1a
tspan35	2.16584e-15	0.168348	0.08	0.02	3.6319e-11	2	tspan35
sema6d	2.79802e-15	0.149425	0.16	0.064	4.692e-11	2	sema6d
gamt	2.85475e-15	1.06418	0.122	0.043	4.78712e-11	2	gamt
si:dkey-112a7.4	3.47799e-15	0.173089	0.101	0.031	5.83224e-11	2	si:dkey-112a7.4
CABZ01068358.1	9.89218e-15	0.20403	0.166	0.069	1.65882e-10	2	CABZ01068358.1
ddt	1.01705e-14	0.105811	0.078	0.02	1.70549e-10	2	ddt
ehbp1l1a	1.17948e-14	0.110048	0.132	0.049	1.97788e-10	2	ehbp1l1a
slc22a2	1.21701e-14	0.550922	0.069	0.017	2.04081e-10	2	slc22a2
pnrc2	1.99388e-14	0.354354	0.664	0.541	3.34353e-10	2	pnrc2
mid1ip1l	2.08219e-14	0.160563	0.067	0.016	3.49163e-10	2	mid1ip1l
atp1b1a	2.76395e-14	1.07399	0.168	0.073	4.63487e-10	2	atp1b1a
higd1a	2.91387e-14	0.340061	0.284	0.16	4.88627e-10	2	higd1a
chmp5b	5.76761e-14	0.121257	0.132	0.049	9.67171e-10	2	chmp5b
actn11	5.77434e-14	0.167371	0.223	0.109	9.68298e-10	2	actn1
mgst3a	5.81881e-14	0.217438	0.132	0.05	9.75756e-10	2	mgst3a
irf2bp2b	7.06942e-14	0.254984	0.206	0.101	1.18547e-09	2	irf2bp2b
mdh1aa1	7.08293e-14	0.589964	0.193	0.094	1.18774e-09	2	mdh1aa
ptgr1	1.47936e-13	0.119624	0.069	0.018	2.48074e-09	2	ptgr1
selenot1a	1.90456e-13	0.146208	0.082	0.024	3.19376e-09	2	selenot1a
csrnp1b	3.40413e-13	0.149573	0.164	0.071	5.70838e-09	2	csrnp1b
zp3	4.44962e-13	0.32124	0.078	0.022	7.46158e-09	2	zp3
cyc1	4.62174e-13	0.12221	0.099	0.033	7.7502e-09	2	cyc1
myh9a	5.37268e-13	0.130776	0.053	0.011	9.00945e-09	2	myh9a
chka	5.60706e-13	0.126652	0.069	0.018	9.40247e-09	2	chka
si:dkey-37o8.1	1.16355e-12	0.244125	0.078	0.023	1.95115e-08	2	si:dkey-37o8.1
uqcr10	1.61657e-12	0.127192	0.084	0.026	2.71082e-08	2	uqcr10
chp1	2.31309e-12	0.162418	0.124	0.049	3.87882e-08	2	chp1
pax2a	2.68276e-12	0.117893	0.059	0.014	4.49873e-08	2	pax2a
si:ch73-335l21.4	2.70133e-12	0.620063	0.487	0.33	4.52987e-08	2	si:ch73-335l21.4
emc2	2.77976e-12	0.107679	0.101	0.035	4.66138e-08	2	emc2
eno31	2.78199e-12	0.44855	0.181	0.09	4.66512e-08	2	eno3
sh2d3cb	2.7859e-12	0.101002	0.132	0.054	4.67168e-08	2	sh2d3cb
klf12a	3.14244e-12	0.102584	0.118	0.045	5.26956e-08	2	klf12a
zgc:66433	4.29072e-12	0.137369	0.107	0.039	7.1951e-08	2	zgc:66433
fahd1	6.2583e-12	0.100385	0.069	0.02	1.04945e-07	2	fahd1
CABZ01061591.1	6.60239e-12	0.11218	0.149	0.066	1.10716e-07	2	CABZ01061591.1
f11r.1	7.48585e-12	0.153124	0.105	0.038	1.2553e-07	2	f11r.1
rhoca	8.10371e-12	0.125953	0.137	0.057	1.35891e-07	2	rhoca
zar1	8.50944e-12	0.215587	0.053	0.012	1.42695e-07	2	zar1
lims1	9.60818e-12	0.211164	0.25	0.145	1.6112e-07	2	lims1
klf3	1.09996e-11	0.115979	0.155	0.07	1.84452e-07	2	klf3
gpx4a	1.14554e-11	0.384974	0.179	0.088	1.92095e-07	2	gpx4a
cldng	1.32783e-11	0.272693	0.067	0.019	2.22664e-07	2	cldng
cox7c	1.38193e-11	0.196013	0.139	0.06	2.31736e-07	2	cox7c
si:ch1073-406l10.2	1.88157e-11	0.114802	0.059	0.015	3.1552e-07	2	si:ch1073-406l10.2
ucp2	1.94313e-11	0.105947	0.069	0.02	3.25843e-07	2	ucp2
slc25a3b1	2.15832e-11	0.325574	0.282	0.173	3.61928e-07	2	slc25a3b
spry2	2.20276e-11	0.311826	0.21	0.112	3.69382e-07	2	spry2
pde4ba	2.45238e-11	0.133103	0.097	0.034	4.11239e-07	2	pde4ba
aldh7a1	3.18296e-11	0.101598	0.074	0.022	5.33751e-07	2	aldh7a1
nfil3-6	3.30551e-11	0.194921	0.09	0.031	5.543e-07	2	nfil3-6
ip6k2b	3.77472e-11	0.172271	0.174	0.084	6.32983e-07	2	ip6k2b
si:dkey-90l23.1	4.88704e-11	0.176705	0.057	0.015	8.19508e-07	2	si:dkey-90l23.1
zp3.2.1	1.29341e-10	0.29492	0.086	0.03	2.16893e-06	2	zp3.2.1
jund	1.32934e-10	0.368974	0.366	0.256	2.22917e-06	2	jund
socs3a	1.45734e-10	0.298809	0.851	0.706	2.44381e-06	2	socs3a
spry4	1.57648e-10	0.155427	0.197	0.103	2.6436e-06	2	spry4
sept7b	2.61164e-10	0.103947	0.092	0.034	4.37945e-06	2	sept7b
gnai2a	3.37746e-10	0.12744	0.101	0.039	5.66365e-06	2	gnai2a
mat1a	4.39423e-10	0.252129	0.086	0.032	7.36868e-06	2	mat1a
cyp3c1	6.59154e-10	0.208819	0.267	0.17	1.10533e-05	2	cyp3c1
mt-cyb	7.51207e-10	0.251677	0.884	0.734	1.2597e-05	2	mt-cyb
mcl1b1	8.59689e-10	0.433459	0.368	0.269	1.44161e-05	2	mcl1b
eif4ebp2	1.36161e-09	0.122905	0.147	0.07	2.28328e-05	2	eif4ebp2
zgc:110339	1.48075e-09	0.24529	0.109	0.047	2.48307e-05	2	zgc:110339
adh8b	1.4841e-09	0.259517	0.153	0.078	2.48868e-05	2	adh8b
btg21	2.03843e-09	0.351078	0.901	0.806	3.41825e-05	2	btg2
cox6b11	3.14864e-09	0.100137	0.097	0.039	5.27995e-05	2	cox6b1
si:dkey-229d11.3	3.33626e-09	0.222623	0.074	0.026	5.59458e-05	2	si:dkey-229d11.3
acadm	3.83801e-09	0.197394	0.145	0.072	6.43596e-05	2	acadm
rhocb	4.10511e-09	0.128976	0.109	0.048	6.88385e-05	2	rhocb
sept7a	4.31005e-09	0.150664	0.145	0.071	7.22752e-05	2	sept7a
tln1	5.19217e-09	0.193777	0.258	0.163	8.70675e-05	2	tln1
etnk1	5.21468e-09	0.103631	0.097	0.039	8.7445e-05	2	etnk1
pbxip1b1	5.45788e-09	0.120537	0.16	0.082	9.15233e-05	2	pbxip1b
zgc:162730	5.8941e-09	0.197032	0.84	0.632	9.88381e-05	2	zgc:162730
ddx5	6.9718e-09	0.24043	0.187	0.105	0.00011691	2	ddx5
gstz1	7.41475e-09	0.127366	0.086	0.034	0.000124338	2	gstz1
ppt1	7.94514e-09	0.140008	0.164	0.086	0.000133232	2	ppt1
glud1a	8.5772e-09	0.137568	0.141	0.069	0.000143831	2	glud1a
si:ch73-160p18.3	8.62489e-09	0.359143	0.143	0.072	0.000144631	2	si:ch73-160p18.3
cox8b1	9.43162e-09	0.191876	0.109	0.05	0.000158159	2	cox8b
tpm4b1	9.44905e-09	0.228559	0.191	0.11	0.000158451	2	tpm4b
cox7a2a	9.4714e-09	0.105581	0.095	0.039	0.000158826	2	cox7a2a
egr2b	9.78861e-09	0.158462	0.055	0.016	0.000164145	2	egr2b
atp5mf	1.14293e-08	0.142565	0.139	0.068	0.000191657	2	atp5mf
grk4	1.32892e-08	0.131373	0.197	0.114	0.000222847	2	grk4
uqcrfs1	1.56468e-08	0.121799	0.12	0.056	0.000262382	2	uqcrfs1
atp5mc3b1	1.75107e-08	0.527978	0.359	0.275	0.000293638	2	atp5mc3b
egr2a	2.30188e-08	0.225997	0.099	0.043	0.000386003	2	egr2a
h1m1	2.38547e-08	0.313794	0.078	0.03	0.00040002	2	h1m
s100w	2.48422e-08	0.125523	0.061	0.02	0.000416578	2	s100w
hgd	2.64188e-08	0.181235	0.059	0.02	0.000443016	2	hgd
cth1	2.88298e-08	0.164853	0.057	0.018	0.000483447	2	cth1
nit2	3.90854e-08	0.166387	0.097	0.043	0.000655424	2	nit2
cox5ab	4.97025e-08	0.116469	0.105	0.048	0.000833461	2	cox5ab
cycsb	5.52828e-08	0.100172	0.09	0.038	0.000927038	2	cycsb
aldh6a1	6.30737e-08	0.266448	0.137	0.071	0.00105768	2	aldh6a1
btg4	6.725e-08	0.223366	0.086	0.036	0.00112771	2	btg4
adh8a	7.65709e-08	0.339527	0.097	0.042	0.00128402	2	adh8a
spink2.1	9.6206e-08	0.125762	0.076	0.03	0.00161328	2	spink2.1
si:dkey-19b23.11	9.76827e-08	0.194803	0.067	0.025	0.00163804	2	si:dkey-19b23.11
dusp21	1.25085e-07	0.441261	0.288	0.206	0.00209755	2	dusp2
psap	1.26469e-07	0.103825	0.092	0.04	0.00212075	2	psap
mpc1	1.39404e-07	0.142177	0.128	0.066	0.00233767	2	mpc1
adka	1.39766e-07	0.109863	0.107	0.051	0.00234373	2	adka
org	1.53802e-07	0.229271	0.063	0.023	0.0025791	2	org
pycard	1.75424e-07	0.111299	0.063	0.023	0.00294169	2	pycard
atp5md	2.00988e-07	0.1206	0.109	0.052	0.00337036	2	atp5md
zgc:162396	2.23876e-07	0.108429	0.09	0.04	0.00375418	2	zgc:162396
acp5a	2.29717e-07	0.223726	0.071	0.029	0.00385212	2	acp5a
kpna7	2.34381e-07	0.135521	0.055	0.019	0.00393034	2	kpna7
daam1a1	2.39157e-07	0.106792	0.16	0.089	0.00401042	2	daam1a
lsm14b	2.40885e-07	0.147792	0.057	0.02	0.0040394	2	lsm14b
tspan3a	2.91804e-07	0.127768	0.181	0.105	0.00489326	2	tspan3a
cyp1d1	3.42373e-07	0.10397	0.116	0.058	0.00574126	2	cyp1d1
cox7b1	3.49435e-07	0.197642	0.172	0.1	0.00585968	2	cox7b
crfb4	3.56394e-07	0.106056	0.151	0.085	0.00597637	2	crfb4
zgc:158343	4.52892e-07	0.408849	0.237	0.155	0.00759454	2	zgc:158343
gyg1a1	5.28556e-07	0.205811	0.086	0.038	0.00886336	2	gyg1a
cox7a11	5.32197e-07	0.188465	0.116	0.059	0.0089244	2	cox7a1
cyp2ad3	7.97694e-07	0.19332	0.288	0.208	0.0133765	2	cyp2ad3
atp5f1c1	8.20177e-07	0.136478	0.17	0.1	0.0137536	2	atp5f1c
tuba8l3	8.75326e-07	0.121261	0.206	0.13	0.0146783	2	tuba8l3
rasgef1ba	8.83763e-07	0.186038	0.233	0.157	0.0148198	2	rasgef1ba
2020-09-02	1.33065e-06	0.241986	0.214	0.147	0.0223137	2	2020-09-02
CABZ01068367.1	1.35416e-06	0.134179	0.181	0.112	0.0227079	2	CABZ01068367.1
zgc:77439	1.36507e-06	0.242721	0.084	0.039	0.0228908	2	zgc:77439
mid1ip1b	1.55682e-06	0.196288	0.057	0.022	0.0261063	2	mid1ip1b
gstp1	1.84994e-06	0.310385	0.147	0.085	0.0310217	2	gstp1
susd6	1.87095e-06	0.105381	0.162	0.096	0.031374	2	susd6
uqcrq	2.39737e-06	0.147247	0.145	0.084	0.0402014	2	uqcrq
pfn2	2.72147e-06	0.319267	0.267	0.189	0.0456363	2	pfn2
cfl11	2.96477e-06	0.238448	0.405	0.329	0.0497162	2	cfl1
tuba8l4	3.04908e-06	0.216215	0.246	0.166	0.05113	2	tuba8l4
itgb4	3.14543e-06	0.167171	0.061	0.025	0.0527458	2	itgb4
zgc:171977	3.26191e-06	0.174357	0.055	0.021	0.054699	2	zgc:171977
gstk1	3.36623e-06	0.109128	0.195	0.124	0.0564483	2	gstk1
srgn	3.39561e-06	0.614312	0.065	0.028	0.0569411	2	srgn
id3	3.94959e-06	0.146831	0.105	0.054	0.0662307	2	id3
junba1	4.33041e-06	0.304671	0.929	0.879	0.0726166	2	junba
ctss2.1	5.18423e-06	0.186159	0.08	0.037	0.0869343	2	ctss2.1
2020-06-01	7.11012e-06	0.31624	0.926	0.893	0.11923	2	jun
marcksl1b1	7.93489e-06	0.41525	0.462	0.426	0.13306	2	marcksl1b
si:ch211-286b5.5	7.97307e-06	0.116613	0.164	0.1	0.1337	2	si:ch211-286b5.5
cox7a2l	8.29945e-06	0.115395	0.107	0.057	0.139174	2	cox7a2l
COX5B1	9.0275e-06	0.17187	0.197	0.129	0.151382	2	COX5B
cox8a	9.36031e-06	0.139298	0.193	0.126	0.156963	2	cox8a
nfe2l2a	1.04465e-05	0.115951	0.164	0.1	0.175177	2	nfe2l2a
zgc:152652	1.13863e-05	0.338639	0.097	0.051	0.190936	2	zgc:152652
ier5l	1.27323e-05	0.160841	0.202	0.131	0.213507	2	ier5l
atp5f1b1	1.27635e-05	0.260721	0.223	0.155	0.214032	2	atp5f1b
tob1a	1.32036e-05	0.156804	0.162	0.101	0.221411	2	tob1a
atp5pd	1.66133e-05	0.149651	0.187	0.123	0.278588	2	atp5pd
pmp22b	1.73062e-05	0.221144	0.172	0.111	0.290207	2	pmp22b
lamp2	2.02265e-05	0.173827	0.057	0.024	0.339178	2	lamp2
CR792441.1	2.09996e-05	0.167115	0.061	0.027	0.352142	2	CR792441.1
atp5if1b	2.15053e-05	0.139166	0.164	0.103	0.360622	2	atp5if1b
zp3.2	2.55901e-05	0.286823	0.057	0.024	0.42912	2	zp3.2
znf395b	2.80717e-05	0.114074	0.158	0.099	0.470735	2	znf395b
si:dkey-112e7.2	3.00898e-05	0.122505	0.212	0.143	0.504576	2	si:dkey-112e7.2
aqp3a	3.05259e-05	0.206015	0.063	0.029	0.511889	2	aqp3a
sat1a.2	3.73089e-05	0.275079	0.292	0.215	0.625633	2	sat1a.2
si:ch211-146l10.8	5.47322e-05	0.156236	0.057	0.025	0.917804	2	si:ch211-146l10.8
gstr	5.85261e-05	0.421668	0.277	0.226	0.981425	2	gstr
2020-09-10	6.60631e-05	0.175903	0.248	0.185	1	2	2020-09-10
ccnb1	6.98081e-05	0.134466	0.057	0.026	1	2	ccnb1
dhrs3a	7.32766e-05	0.121519	0.17	0.113	1	2	dhrs3a
idh21	7.47498e-05	0.178744	0.176	0.118	1	2	idh2
CABZ01059627.3	8.04459e-05	0.10195	0.055	0.024	1	2	CABZ01059627.3
inhbaa	9.44271e-05	0.116467	0.092	0.051	1	2	inhbaa
junbb	0.000126128	0.269562	0.345	0.295	1	2	junbb
hmgb2a	0.000136131	0.106413	0.16	0.103	1	2	hmgb2a
sertad4	0.000157264	0.125925	0.21	0.152	1	2	sertad4
ahcy	0.000168584	0.645573	0.164	0.117	1	2	ahcy
krt18a.1	0.000230084	0.195803	0.366	0.303	1	2	krt18a.1
dhrs1	0.000250183	0.130221	0.225	0.169	1	2	dhrs1
atp5if1a	0.000261678	0.134088	0.103	0.061	1	2	atp5if1a
acvrl1	0.000287019	0.114673	0.225	0.168	1	2	acvrl1
ctsba	0.000300012	0.103237	0.099	0.057	1	2	ctsba
tnrc6c1	0.000301337	0.157179	0.229	0.172	1	2	tnrc6c1
ier2a1	0.000318668	0.302823	0.429	0.377	1	2	ier2a
si:dkeyp-50f7.2	0.000376067	0.229545	0.063	0.032	1	2	si:dkeyp-50f7.2
cirbpa	0.000398569	0.18111	0.237	0.174	1	2	cirbpa
slc25a25a	0.00041682	0.102265	0.061	0.031	1	2	slc25a25a
chac1	0.000478571	0.129227	0.149	0.098	1	2	chac1
bzw1b	0.000485041	0.12373	0.099	0.059	1	2	bzw1b
ier51	0.000493316	0.1948	0.389	0.326	1	2	ier5
prss23	0.000497842	0.107154	0.212	0.156	1	2	prss23
actb11	0.000554377	0.14023	0.754	0.602	1	2	actb1
khdrbs1a	0.000596209	0.150118	0.229	0.167	1	2	khdrbs1a
nfkbiaa	0.000626462	0.103166	0.099	0.059	1	2	nfkbiaa
tns1b	0.000652434	0.124006	0.206	0.158	1	2	tns1b
atp5fa11	0.000655024	0.167757	0.162	0.113	1	2	atp5fa1
gtf2a1	0.000682472	0.101317	0.055	0.027	1	2	gtf2a1
sdc41	0.000793793	0.162071	0.653	0.544	1	2	sdc4
si:ch211-146l10.7	0.00088156	0.135104	0.055	0.028	1	2	si:ch211-146l10.7
scp2a	0.000903314	0.152952	0.084	0.05	1	2	scp2a
cox6c1	0.000912988	0.108561	0.137	0.092	1	2	cox6c
ankrd12	0.000994783	0.102506	0.193	0.144	1	2	ankrd12
cox6a2	0.00104393	0.15531	0.09	0.055	1	2	cox6a2
zgc:1538671	0.00111158	0.257783	0.525	0.49	1	2	zgc:153867
aoc2	0.00143772	0.332063	0.158	0.115	1	2	aoc2
ptmab	0.00154793	0.113417	0.319	0.258	1	2	ptmab
si:ch1073-263o8.2	0.00162886	0.105639	0.057	0.03	1	2	si:ch1073-263o8.2
atp5l1	0.00169438	0.218993	0.208	0.163	1	2	atp5l
xbp11	0.00174296	0.173842	0.336	0.279	1	2	xbp1
ddx6	0.0021754	0.105096	0.099	0.063	1	2	ddx6
slc9a3r1a	0.0024064	0.101795	0.099	0.065	1	2	slc9a3r1a
angptl4	0.002438	0.213093	0.099	0.064	1	2	angptl4
pfn11	0.00262135	0.814873	0.183	0.144	1	2	pfn1
gadd45ba	0.00312528	0.101369	0.628	0.502	1	2	gadd45ba
h3f3b.1.1	0.00322418	0.161575	0.305	0.259	1	2	h3f3b.1.1
si:dkey-229d11.5	0.00395281	0.135961	0.059	0.034	1	2	si:dkey-229d11.5
mdka1	0.00457602	0.141466	0.317	0.267	1	2	mdka
ehd2b	0.00477453	0.106885	0.21	0.166	1	2	ehd2b
krt911	0.00500882	0.358562	0.256	0.333	1	2	krt91
acy1.1	0.00568056	0.100635	0.071	0.045	1	2	acy1.1
hspa8	0.00658835	0.159415	0.397	0.34	1	2	hspa8
hnrnpa0l.1	0.00832677	0.209654	0.282	0.241	1	2	hnrnpa0l.1
atp5pf	0.00869689	0.124809	0.174	0.134	1	2	atp5pf
igfbp5b	0	3.07665	0.705	0.044	0	3	igfbp5b
spon2b	0	1.79833	0.311	0.002	0	3	spon2b
CABZ01092746.11	0	1.66083	0.872	0.102	0	3	CABZ01092746.1
pcolcea	0	1.4811	0.725	0.049	0	3	pcolcea
osr1	0	1.07596	0.646	0.034	0	3	osr1
htra1a	0	0.890244	0.482	0.011	0	3	htra1a
crabp2a	0	0.782346	0.354	0.003	0	3	crabp2a
neu3.5	0	0.687492	0.387	0.002	0	3	neu3.5
scara3	0	0.653871	0.505	0.02	0	3	scara3
thbs3a	0	0.640994	0.403	0.001	0	3	thbs3a
fgl2b	0	0.562485	0.341	0.004	0	3	fgl2b
slit3	2.48438e-306	0.947706	0.626	0.048	4.16605e-302	3	slit3
endouc	4.50539e-302	1.80367	0.672	0.059	7.55509e-298	3	endouc
plpp3	2.45902e-300	1.19975	0.728	0.076	4.12353e-296	3	plpp3
neu3.4	4.18393e-292	0.66561	0.259	0	7.01603e-288	3	neu3.4
si:ch211-227m13.1	7.62989e-280	0.350245	0.279	0.002	1.27946e-275	3	si:ch211-227m13.1
dpt	4.77548e-264	0.843287	0.436	0.021	8.008e-260	3	dpt
si:ch211-67e16.11	8.42755e-264	0.633309	0.259	0.002	1.41322e-259	3	si:ch211-67e16.11
itih5	1.52671e-261	0.3617	0.246	0.001	2.56013e-257	3	itih5
wnt9a	7.48224e-258	0.292255	0.239	0.001	1.2547e-253	3	wnt9a
gpc6a	1.29354e-254	0.328335	0.272	0.003	2.16913e-250	3	gpc6a
twist1b	2.54597e-254	0.460281	0.338	0.01	4.26934e-250	3	twist1b
vcanb	1.65813e-249	0.358457	0.289	0.005	2.78052e-245	3	vcanb
htra1b	1.76584e-246	0.809858	0.285	0.005	2.96114e-242	3	htra1b
rbp4	4.00579e-239	2.4112	0.875	0.178	6.71732e-235	3	rbp4
fn1a	8.65431e-236	0.697113	0.446	0.027	1.45124e-231	3	fn1a
si:dkey-261h17.1	6.16421e-231	0.69466	0.439	0.027	1.03368e-226	3	si:dkey-261h17.1
ca10b	5.87946e-223	0.313926	0.239	0.003	9.85927e-219	3	ca10b
prrx1a	4.44058e-219	0.464518	0.338	0.014	7.44641e-215	3	prrx1a
ifitm11	4.2971e-208	1.90174	0.452	0.035	7.20581e-204	3	ifitm1
dio2	7.0186e-206	0.418813	0.275	0.008	1.17695e-201	3	dio2
vim	3.64307e-205	0.853721	0.639	0.082	6.10906e-201	3	vim
mfge8b	1.61769e-204	0.926292	0.292	0.01	2.7127e-200	3	mfge8b
nova2	9.28897e-203	0.526924	0.416	0.029	1.55767e-198	3	nova2
crabp1b	1.73138e-192	0.361275	0.256	0.007	2.90335e-188	3	crabp1b
crhbp	2.51243e-192	0.71209	0.197	0.002	4.21309e-188	3	crhbp
slit2	5.21966e-192	0.322473	0.223	0.004	8.75284e-188	3	slit2
nptx1l	2.68261e-186	0.358274	0.197	0.002	4.49846e-182	3	nptx1l
hapln3	7.0609e-185	0.409592	0.246	0.007	1.18404e-180	3	hapln3
emilin2a	1.40815e-182	0.197433	0.177	0.001	2.36132e-178	3	emilin2a
fbln2	4.00979e-182	0.384399	0.305	0.015	6.72402e-178	3	fbln2
cpz	5.54649e-178	0.251891	0.223	0.005	9.3009e-174	3	cpz
plvapb	4.80926e-174	0.555739	0.2	0.003	8.06464e-170	3	plvapb
sostdc1a	4.91977e-168	1.01095	0.213	0.005	8.24997e-164	3	sostdc1a
asip2b	1.58797e-163	1.116	0.308	0.018	2.66287e-159	3	asip2b
ackr3b	2.08551e-163	0.635982	0.305	0.018	3.4972e-159	3	ackr3b
gata2a	1.2621e-160	0.326002	0.279	0.014	2.11641e-156	3	gata2a
mgp	2.26462e-159	0.512048	0.223	0.007	3.79754e-155	3	mgp
cdh6	3.77838e-158	0.346791	0.282	0.015	6.33596e-154	3	cdh6
icn	2.72764e-157	0.960584	0.698	0.126	4.57398e-153	3	icn
cbln2b	2.01559e-155	0.285467	0.138	0	3.37995e-151	3	cbln2b
si:ch211-105c13.3	3.18138e-155	1.11693	0.649	0.125	5.33486e-151	3	si:ch211-105c13.3
tspan351	3.19737e-151	0.271433	0.256	0.012	5.36167e-147	3	tspan35
tcf21	6.43907e-150	0.41962	0.262	0.013	1.07977e-145	3	tcf21
cx43	1.1069e-141	0.745275	0.239	0.011	1.85617e-137	3	cx43
aqp3a1	1.56079e-140	1.34415	0.275	0.017	2.61729e-136	3	aqp3a
fstb	4.55162e-140	0.782181	0.407	0.046	7.63261e-136	3	fstb
sost1	1.00931e-138	0.668892	0.4	0.043	1.69251e-134	3	sost
tsku	1.07033e-135	0.506123	0.452	0.061	1.79484e-131	3	tsku
vmo1a	2.9502e-132	0.513676	0.348	0.034	4.9472e-128	3	vmo1a
si:ch211-251b21.1	4.8175e-131	0.223838	0.154	0.003	8.07846e-127	3	si:ch211-251b21.1
gpr78a	9.0874e-128	0.269296	0.223	0.011	1.52387e-123	3	gpr78a
CR383676.11	1.49422e-127	0.727683	0.997	0.99	2.50566e-123	3	CR383676.1
adrb3a	4.52837e-126	0.209805	0.167	0.005	7.59362e-122	3	adrb3a
s100w1	1.59478e-121	0.386806	0.223	0.012	2.67428e-117	3	s100w
crabp2b	1.51858e-120	0.155128	0.128	0.002	2.54651e-116	3	crabp2b
galr1b	6.14103e-120	0.169992	0.125	0.001	1.02979e-115	3	galr1b
wnt7bb	7.00811e-120	0.216608	0.148	0.003	1.17519e-115	3	wnt7bb
c1qtnf2	2.34021e-117	0.345818	0.348	0.039	3.9243e-113	3	c1qtnf2
BX663503.3	4.01368e-116	0.358871	0.341	0.037	6.73054e-112	3	BX663503.3
adgrg6	3.54204e-110	0.160714	0.128	0.002	5.93965e-106	3	adgrg6
id2b	6.04996e-108	1.21044	0.351	0.044	1.01452e-103	3	id2b
FP102783.1	1.84418e-107	0.179319	0.151	0.005	3.0925e-103	3	FP102783.1
tril1	5.02346e-105	0.483869	0.364	0.05	8.42383e-101	3	tril
myoc	3.15199e-104	0.480708	0.151	0.005	5.28557e-100	3	myoc
col1a2	6.76133e-104	1.37322	0.882	0.449	1.13381e-99	3	col1a2
emp2	3.52444e-103	0.80985	0.679	0.204	5.91014e-99	3	emp2
dub	1.69643e-102	0.306546	0.203	0.013	2.84475e-98	3	dub
fpr1	6.53561e-102	0.159568	0.125	0.003	1.09596e-97	3	fpr1
mfap5	1.0607e-97	0.988776	0.748	0.28	1.77869e-93	3	mfap5
alkal2b	7.51474e-96	0.361768	0.161	0.007	1.26015e-91	3	alkal2b
sema3d	3.04034e-95	0.281172	0.21	0.016	5.09834e-91	3	sema3d
rgcc	2.37961e-94	0.550485	0.223	0.018	3.99037e-90	3	rgcc
sfrp1b	2.70315e-93	0.453958	0.249	0.024	4.53292e-89	3	sfrp1b
hapln1b	6.47047e-93	0.175396	0.144	0.006	1.08503e-88	3	hapln1b
si:ch211-160j14.3	1.12283e-92	0.193403	0.105	0.002	1.88287e-88	3	si:ch211-160j14.3
vasna1	1.69485e-92	0.381093	0.341	0.049	2.84209e-88	3	vasna
lgals2a1	3.82423e-92	0.595981	0.338	0.048	6.41285e-88	3	lgals2a
tmsb1	7.5522e-90	0.48213	0.38	0.057	1.26643e-85	3	tmsb1
ccl25b1	8.10789e-90	1.45276	0.577	0.154	1.35961e-85	3	ccl25b
fam107b1	4.28554e-88	0.511219	0.305	0.041	7.18641e-84	3	fam107b
srgn1	5.65625e-86	0.699707	0.22	0.02	9.48497e-82	3	srgn
cebpa	2.18384e-85	0.526876	0.387	0.069	3.66209e-81	3	cebpa
hsd17b1	1.26099e-82	0.287895	0.089	0.001	2.11455e-78	3	hsd17b1
rem11	2.14184e-82	0.403179	0.279	0.036	3.59165e-78	3	rem1
col1a1b	2.55541e-82	1.17719	0.895	0.65	4.28517e-78	3	col1a1b
rspo3	2.95913e-82	0.299721	0.197	0.016	4.96217e-78	3	rspo3
lmx1bb	7.70676e-82	0.144207	0.121	0.004	1.29235e-77	3	lmx1bb
clic2	1.04168e-80	0.945333	0.315	0.049	1.74679e-76	3	clic2
im:7151449	2.97129e-80	0.339658	0.239	0.027	4.98255e-76	3	im:7151449
ppfibp2b	2.50023e-78	0.178048	0.151	0.009	4.19264e-74	3	ppfibp2b
fstl1a	4.1188e-77	0.416508	0.285	0.041	6.90681e-73	3	fstl1a
mustn1a	4.40156e-77	0.195634	0.203	0.019	7.38098e-73	3	mustn1a
ugt5g1	9.55201e-75	0.131703	0.134	0.007	1.60178e-70	3	ugt5g1
angptl1a	1.02948e-74	0.524404	0.321	0.054	1.72633e-70	3	angptl1a
dcn	2.71892e-74	0.80351	0.82	0.461	4.55936e-70	3	dcn
abhd15a	8.36608e-74	0.379795	0.22	0.025	1.40291e-69	3	abhd15a
cldn11a	1.39013e-73	0.987557	0.295	0.047	2.33111e-69	3	cldn11a
zcchc24	1.58277e-73	0.46785	0.436	0.103	2.65415e-69	3	zcchc24
foxp4	6.10912e-73	0.340435	0.269	0.037	1.02444e-68	3	foxp4
prelp	2.22601e-72	0.175207	0.154	0.011	3.73279e-68	3	prelp
dhrs3b1	8.84041e-72	0.686153	0.426	0.099	1.48245e-67	3	dhrs3b
arsj	9.53516e-71	0.113595	0.105	0.004	1.59895e-66	3	arsj
ebf3a.1	1.73055e-70	0.103201	0.089	0.002	2.90197e-66	3	ebf3a.1
loxl1	1.43034e-69	0.215347	0.21	0.023	2.39854e-65	3	loxl1
c1qtnf51	2.63272e-68	0.624449	0.41	0.095	4.41481e-64	3	c1qtnf5
pmp22a1	4.68466e-68	0.917102	0.934	0.744	7.85571e-64	3	pmp22a
si:dkey-7j14.5	8.09265e-67	0.188391	0.164	0.014	1.35706e-62	3	si:dkey-7j14.5
sema3fa	5.83068e-66	0.211731	0.17	0.016	9.77747e-62	3	sema3fa
sfrp5	1.44519e-65	0.219044	0.125	0.007	2.42343e-61	3	sfrp5
nfixb	2.00577e-65	0.279153	0.298	0.052	3.36348e-61	3	nfixb
zgc:195173	2.74186e-65	0.627085	0.443	0.119	4.59782e-61	3	zgc:195173
loxa	1.97878e-64	0.133416	0.092	0.003	3.31822e-60	3	loxa
hapln1a	2.73263e-64	0.67907	0.121	0.007	4.58235e-60	3	hapln1a
si:ch211-198c19.31	3.4582e-64	0.719677	0.436	0.114	5.79905e-60	3	si:ch211-198c19.3
ehd1b	6.0482e-63	0.402496	0.282	0.049	1.01422e-58	3	ehd1b
lhfpl6	3.38157e-62	0.320044	0.348	0.074	5.67055e-58	3	lhfpl6
abi3bpb	2.10311e-61	0.234649	0.161	0.015	3.5267e-57	3	abi3bpb
dhrs3a1	4.40388e-61	0.613729	0.397	0.102	7.38487e-57	3	dhrs3a
klf2a	5.54836e-61	0.981214	0.518	0.171	9.30405e-57	3	klf2a
hpgd	6.21432e-61	0.226116	0.111	0.006	1.04208e-56	3	hpgd
kalrnb	1.22185e-59	0.208033	0.148	0.013	2.04892e-55	3	kalrnb
si:ch73-173h19.3	1.85861e-59	0.121159	0.102	0.005	3.11671e-55	3	si:ch73-173h19.3
itgb2	3.09689e-59	0.199015	0.2	0.025	5.19318e-55	3	itgb2
ablim1b	3.76932e-59	0.418644	0.42	0.111	6.32078e-55	3	ablim1b
nhsl2	6.89318e-59	0.153417	0.128	0.009	1.15592e-54	3	nhsl2
crip11	1.07847e-58	0.871408	0.331	0.07	1.80849e-54	3	crip1
pdcd6	6.41178e-58	0.385806	0.364	0.086	1.07519e-53	3	pdcd6
fhl1b	1.09866e-57	0.192111	0.19	0.023	1.84234e-53	3	fhl1b
plekho2	1.8091e-57	0.329348	0.334	0.074	3.03368e-53	3	plekho2
pnp4a	1.65282e-56	0.463701	0.085	0.003	2.77162e-52	3	pnp4a
agmo	3.48292e-56	0.168218	0.19	0.024	5.84051e-52	3	agmo
adh8a1	1.41361e-55	1.09955	0.233	0.036	2.37049e-51	3	adh8a
thbs2a	2.03535e-55	0.137779	0.098	0.005	3.41308e-51	3	thbs2a
edil3a	2.37786e-55	0.28499	0.262	0.047	3.98743e-51	3	edil3a
isl2b	2.81955e-55	0.110103	0.089	0.004	4.7281e-51	3	isl2b
prrx1b	2.95601e-55	0.105459	0.098	0.005	4.95693e-51	3	prrx1b
meis2b1	1.39953e-54	0.217984	0.226	0.035	2.34688e-50	3	meis2b
serpinf1	4.00663e-52	0.648847	0.466	0.161	6.71871e-48	3	serpinf1
bcl2b	1.9863e-51	0.177353	0.131	0.012	3.33082e-47	3	bcl2b
syt11a	1.64629e-50	0.141809	0.144	0.015	2.76066e-46	3	syt11a
krt94	1.77877e-50	1.50226	0.721	0.459	2.98281e-46	3	krt94
loxl2b	1.79326e-50	0.285964	0.262	0.052	3.00711e-46	3	loxl2b
zgc:153704	2.03055e-50	0.221993	0.079	0.003	3.40503e-46	3	zgc:153704
col1a1a	3.37594e-50	1.04316	0.836	0.615	5.66111e-46	3	col1a1a
fgfr1a	6.10786e-49	0.156857	0.167	0.021	1.02423e-44	3	fgfr1a
si:ch211-246m6.5	6.72206e-49	0.101	0.102	0.007	1.12722e-44	3	si:ch211-246m6.5
s100a10b	9.2163e-49	0.63302	0.751	0.371	1.54548e-44	3	s100a10b
ptgs1	1.08115e-48	0.158242	0.148	0.016	1.81297e-44	3	ptgs1
emid1	1.59423e-48	0.192625	0.17	0.023	2.67337e-44	3	emid1
klf31	2.59831e-48	0.284921	0.292	0.065	4.3571e-44	3	klf3
phlda3	2.94212e-48	0.234076	0.177	0.025	4.93365e-44	3	phlda3
ivns1abpa	1.10518e-46	0.395999	0.095	0.006	1.85327e-42	3	ivns1abpa
alx4a	2.24867e-46	0.1137	0.095	0.006	3.7708e-42	3	alx4a
prss231	2.5903e-46	0.487	0.436	0.144	4.34368e-42	3	prss23
dock9b	4.53239e-46	0.230565	0.22	0.039	7.60036e-42	3	dock9b
hoxc3a1	4.17002e-45	0.201066	0.233	0.044	6.99271e-41	3	hoxc3a
sult1st6	5.19854e-45	0.216517	0.22	0.04	8.71743e-41	3	sult1st6
cad	7.10389e-45	0.210302	0.095	0.007	1.19125e-40	3	cad
fbxo34	7.89155e-45	0.201824	0.121	0.012	1.32333e-40	3	fbxo34
ehbp1l1b	2.4859e-44	0.160294	0.177	0.026	4.1686e-40	3	ehbp1l1b
ccdc3b	2.50907e-44	0.221212	0.184	0.029	4.20746e-40	3	ccdc3b
lrp1aa	4.71386e-44	0.42346	0.393	0.119	7.90467e-40	3	lrp1aa
sesn1	6.30414e-44	0.56068	0.41	0.134	1.05714e-39	3	sesn1
srpra	2.20258e-43	0.18719	0.102	0.008	3.69351e-39	3	srpra
igf2a1	2.5338e-43	0.333482	0.216	0.04	4.24893e-39	3	igf2a
clu	8.80068e-43	0.668668	0.37	0.111	1.47579e-38	3	clu
hspb8	5.49835e-42	0.148745	0.157	0.022	9.22017e-38	3	hspb8
tnfsf10l	1.15255e-41	0.369352	0.393	0.128	1.93272e-37	3	tnfsf10l
rbp5	2.6209e-41	0.294769	0.17	0.026	4.39499e-37	3	rbp5
prickle1b	3.65636e-41	0.141782	0.144	0.019	6.13134e-37	3	prickle1b
rnd3b	1.39788e-40	0.525723	0.469	0.189	2.34411e-36	3	rnd3b
gpr146	2.03505e-40	0.148463	0.144	0.019	3.41257e-36	3	gpr146
rnd3a	2.91299e-39	0.346898	0.426	0.151	4.88479e-35	3	rnd3a
rbpjb	3.20376e-39	0.222011	0.282	0.071	5.37239e-35	3	rbpjb
flnb	5.70019e-38	0.239109	0.246	0.057	9.55864e-34	3	flnb
hic1	7.02207e-38	0.319825	0.377	0.124	1.17753e-33	3	hic1
arl4ab	8.49132e-38	0.10372	0.108	0.011	1.42391e-33	3	arl4ab
col5a1	1.16017e-37	0.713842	0.672	0.375	1.94548e-33	3	col5a1
tgfbi	1.60339e-37	0.162473	0.095	0.009	2.68872e-33	3	tgfbi
ada	3.2097e-37	0.153991	0.167	0.028	5.38234e-33	3	ada
fgfr2	8.78847e-37	0.288597	0.292	0.081	1.47374e-32	3	fgfr2
crabp1a	4.12909e-36	0.126382	0.089	0.008	6.92406e-32	3	crabp1a
marcksl1a1	6.34183e-36	0.802227	0.948	0.826	1.06346e-31	3	marcksl1a
anxa5b	8.29063e-36	0.53809	0.403	0.15	1.39026e-31	3	anxa5b
col5a2a	1.47299e-35	0.505772	0.593	0.295	2.47005e-31	3	col5a2a
alcama	2.55393e-35	0.351101	0.105	0.012	4.28269e-31	3	alcama
si:dkey-238i5.2	3.81377e-35	0.131514	0.125	0.017	6.39531e-31	3	si:dkey-238i5.2
sulf2b	4.05174e-35	0.212483	0.095	0.009	6.79436e-31	3	sulf2b
neu3.2	4.89284e-35	0.165239	0.17	0.031	8.20481e-31	3	neu3.2
dpysl3	5.07662e-35	0.157554	0.184	0.035	8.51299e-31	3	dpysl3
tgfbr2b	1.20779e-34	0.175123	0.167	0.03	2.02535e-30	3	tgfbr2b
mef2aa	1.29125e-34	0.210236	0.226	0.053	2.16529e-30	3	mef2aa
pcolce2b	2.04143e-34	0.332515	0.341	0.113	3.42328e-30	3	pcolce2b
hsd11b2	3.48713e-34	0.787754	0.475	0.21	5.84757e-30	3	hsd11b2
col16a1	3.74961e-34	0.199063	0.216	0.049	6.28771e-30	3	col16a1
lum	4.54529e-34	0.43783	0.079	0.006	7.62201e-30	3	lum
fstl1b	9.76905e-34	0.506839	0.652	0.371	1.63817e-29	3	fstl1b
si:dkey-16l2.20	1.19386e-33	0.46269	0.377	0.135	2.00199e-29	3	si:dkey-16l2.20
lmo4b	1.30968e-33	0.180311	0.164	0.03	2.19619e-29	3	lmo4b
slc7a3a	1.93967e-33	0.114409	0.062	0.004	3.25264e-29	3	slc7a3a
CT030188.1	2.30614e-33	0.177962	0.2	0.043	3.86716e-29	3	CT030188.1
ackr4b	3.26935e-33	0.137884	0.102	0.011	5.48237e-29	3	ackr4b
il13ra2	8.76029e-33	0.461182	0.108	0.014	1.46901e-28	3	il13ra2
uap1	2.09492e-32	0.154488	0.134	0.021	3.51297e-28	3	uap1
lpar1	8.00968e-32	0.30482	0.37	0.134	1.34314e-27	3	lpar1
kirrel1a	1.63636e-31	0.27433	0.37	0.135	2.74401e-27	3	kirrel1a
angptl41	2.71176e-31	0.44451	0.226	0.058	4.54735e-27	3	angptl4
ctsla	4.29896e-31	0.64862	0.285	0.085	7.20892e-27	3	ctsla
igf2b	5.63032e-31	0.522533	0.433	0.172	9.44148e-27	3	igf2b
iqsec1b	1.17272e-30	0.19477	0.236	0.062	1.96654e-26	3	iqsec1b
sort1a	1.47356e-30	0.261642	0.262	0.076	2.47102e-26	3	sort1a
mmp14b	2.69507e-30	0.291284	0.374	0.141	4.51937e-26	3	mmp14b
zgc:154093	3.52903e-30	0.143952	0.174	0.036	5.91783e-26	3	zgc:154093
hoxa3a	1.0472e-29	0.144204	0.164	0.033	1.75605e-25	3	hoxa3a
metrnla	1.72209e-29	0.230475	0.21	0.052	2.88777e-25	3	metrnla
tnfaip2a	2.79904e-29	0.138953	0.138	0.024	4.69372e-25	3	tnfaip2a
fzd7b	2.90124e-29	0.377801	0.367	0.143	4.86509e-25	3	fzd7b
pamr1	3.3858e-29	0.161825	0.177	0.039	5.67764e-25	3	pamr1
si:ch1073-459j12.1	3.46199e-29	0.491244	0.518	0.265	5.80542e-25	3	si:ch1073-459j12.1
arl6ip5b	3.68423e-29	0.359854	0.367	0.142	6.17808e-25	3	arl6ip5b
sult2st1	4.16075e-29	0.137306	0.128	0.021	6.97716e-25	3	sult2st1
bicc1a	5.28922e-29	0.109473	0.121	0.019	8.86949e-25	3	bicc1a
gmps	1.90208e-28	0.197319	0.095	0.012	3.1896e-24	3	gmps
bag2	2.70508e-28	0.124012	0.134	0.024	4.53615e-24	3	bag2
ptprfb	2.81789e-28	0.133217	0.072	0.007	4.72532e-24	3	ptprfb
hoxa10b	3.44694e-28	0.105309	0.095	0.012	5.78018e-24	3	hoxa10b
col4a5	5.85847e-28	0.19453	0.095	0.012	9.82407e-24	3	col4a5
wfdc1	5.863e-28	0.107009	0.095	0.012	9.83167e-24	3	wfdc1
htra3a1	7.10961e-28	0.116283	0.131	0.023	1.19221e-23	3	htra3a
pbx3b	1.58328e-27	0.127955	0.125	0.021	2.655e-23	3	pbx3b
si:ch211-243a20.3	3.12663e-27	0.300905	0.056	0.004	5.24305e-23	3	si:ch211-243a20.3
meis1a	3.30522e-27	0.205292	0.256	0.078	5.54252e-23	3	meis1a
cemip	6.53304e-27	0.157909	0.121	0.021	1.09553e-22	3	cemip
s100v21	9.97907e-27	0.472097	0.633	0.38	1.67339e-22	3	s100v2
chka1	1.58437e-26	0.145165	0.111	0.018	2.65682e-22	3	chka
c6.11	5.9768e-26	0.698969	0.695	0.513	1.00225e-21	3	c6.1
ccl19a.1	7.17068e-26	0.124384	0.098	0.014	1.20245e-21	3	ccl19a.1
fkbp1ab	1.28306e-25	0.108768	0.052	0.004	2.15156e-21	3	fkbp1ab
itpkcb	2.2018e-25	0.136124	0.161	0.036	3.69221e-21	3	itpkcb
tlr5b	4.13665e-25	0.185591	0.226	0.067	6.93675e-21	3	tlr5b
srpx	5.57319e-25	0.144272	0.134	0.027	9.34569e-21	3	srpx
sesn3	1.01271e-24	0.16067	0.18	0.046	1.69821e-20	3	sesn3
mgst1.2	3.08811e-24	0.264857	0.193	0.052	5.17845e-20	3	mgst1.2
cd631	5.11992e-24	0.43817	0.692	0.481	8.5856e-20	3	cd63
cxcl8b.1	7.39426e-24	0.472878	0.128	0.026	1.23994e-19	3	cxcl8b.1
adam19a	8.7942e-24	0.113209	0.121	0.023	1.4747e-19	3	adam19a
skia	1.8262e-23	0.180308	0.262	0.089	3.06236e-19	3	skia
phlda21	1.94102e-23	0.49111	0.118	0.022	3.2549e-19	3	phlda2
col6a4a	4.26629e-23	0.145754	0.151	0.035	7.15414e-19	3	col6a4a
col6a3	4.49516e-23	0.607668	0.62	0.409	7.53793e-19	3	col6a3
itga5	5.79376e-23	0.171969	0.223	0.069	9.71555e-19	3	itga5
fxyd6l1	8.81407e-23	0.435773	0.452	0.223	1.47803e-18	3	fxyd6l
specc1la	9.96969e-23	0.14432	0.161	0.04	1.67182e-18	3	specc1la
ip6k2b1	1.01434e-22	0.305418	0.246	0.083	1.70094e-18	3	ip6k2b
boc1	1.03936e-22	0.380281	0.561	0.315	1.7429e-18	3	boc
id31	2.50904e-22	0.358347	0.184	0.051	4.2074e-18	3	id3
hoxb3a	3.26375e-22	0.115408	0.131	0.028	5.47297e-18	3	hoxb3a
uck2a	4.74785e-22	0.187591	0.095	0.016	7.96166e-18	3	uck2a
mdka2	1.22558e-21	0.466818	0.502	0.257	2.05517e-17	3	mdka
twist1a	1.2456e-21	0.187948	0.193	0.057	2.08875e-17	3	twist1a
cldn5a	1.65837e-21	0.558038	0.423	0.213	2.78092e-17	3	cldn5a
cish	4.9608e-21	0.236228	0.216	0.07	8.31877e-17	3	cish
ppap2d	4.98555e-21	0.257731	0.397	0.187	8.36027e-17	3	ppap2d
pmp22b1	9.56971e-21	0.391644	0.275	0.107	1.60474e-16	3	pmp22b
glud1a1	1.14964e-20	0.240593	0.21	0.067	1.92783e-16	3	glud1a
glula	2.03194e-20	0.197055	0.118	0.025	3.40735e-16	3	glula
nudt17	2.37826e-20	0.118609	0.157	0.041	3.9881e-16	3	nudt17
ITLN1 (1 of many).11	3.60923e-20	0.323886	0.597	0.353	6.05232e-16	3	ITLN1 (1 of many).1
dusp8a	4.03644e-20	0.263988	0.216	0.073	6.7687e-16	3	dusp8a
fgfr4	4.2972e-20	0.10979	0.141	0.034	7.20598e-16	3	fgfr4
sash1a	6.6656e-20	0.138766	0.092	0.016	1.11775e-15	3	sash1a
pdgfra	6.82652e-20	0.330718	0.302	0.12	1.14474e-15	3	pdgfra
bco2a	8.3161e-20	0.100957	0.125	0.028	1.39453e-15	3	bco2a
inhbaa1	2.01299e-19	0.303224	0.167	0.048	3.37558e-15	3	inhbaa
si:dkey-42i9.6	2.06153e-19	0.208174	0.177	0.052	3.45697e-15	3	si:dkey-42i9.6
pkp3b	2.79303e-19	0.175796	0.148	0.039	4.68364e-15	3	pkp3b
mfap21	2.91462e-19	0.435263	0.59	0.382	4.88752e-15	3	mfap2
etnk11	3.18843e-19	0.120024	0.148	0.038	5.34668e-15	3	etnk1
col11a1b	3.48962e-19	0.111225	0.095	0.018	5.85174e-15	3	col11a1b
c7a	4.09023e-19	0.274345	0.318	0.139	6.85891e-15	3	c7a
bckdhbl	8.108e-19	0.118609	0.154	0.042	1.35963e-14	3	bckdhbl
pdk2a	9.00056e-19	0.131347	0.174	0.052	1.5093e-14	3	pdk2a
bhlhe41	9.33262e-19	0.209506	0.239	0.089	1.56499e-14	3	bhlhe41
abca1a	1.01911e-18	0.221553	0.216	0.076	1.70895e-14	3	abca1a
cd28	1.11527e-18	0.176373	0.256	0.098	1.87019e-14	3	cd28
emx2	1.39786e-18	0.121516	0.102	0.02	2.34407e-14	3	emx2
fgl2a	1.41782e-18	0.239177	0.289	0.118	2.37755e-14	3	fgl2a
cyth1a.1	1.66386e-18	0.105723	0.095	0.018	2.79013e-14	3	cyth1a.1
hprt1	2.10424e-18	0.103639	0.056	0.007	3.52859e-14	3	hprt1
sept9a	3.19471e-18	0.124614	0.092	0.017	5.35722e-14	3	sept9a
serpina10a	3.83375e-18	0.223968	0.338	0.154	6.42881e-14	3	serpina10a
zgc:1539111	8.15157e-18	0.223932	0.066	0.009	1.36694e-13	3	zgc:153911
arrdc3a	1.28464e-17	0.262919	0.157	0.047	2.15421e-13	3	arrdc3a
cyp2p7	1.30986e-17	0.244848	0.325	0.148	2.1965e-13	3	cyp2p7
spry41	1.55708e-17	0.197879	0.262	0.102	2.61107e-13	3	spry4
zfp36l1b	1.90082e-17	0.603661	0.423	0.239	3.18748e-13	3	zfp36l1b
ramp2	2.13261e-17	0.352025	0.167	0.052	3.57617e-13	3	ramp2
gpc1b	3.14798e-17	0.136794	0.138	0.037	5.27885e-13	3	gpc1b
nck1a	3.71485e-17	0.173332	0.252	0.1	6.22943e-13	3	nck1a
rab40b	3.76884e-17	0.164561	0.22	0.081	6.31997e-13	3	rab40b
ghra	7.10675e-17	0.161656	0.223	0.084	1.19173e-12	3	ghra
jam3b1	7.48537e-17	0.257454	0.397	0.212	1.25522e-12	3	jam3b
glulb	8.41148e-17	0.618793	0.144	0.043	1.41052e-12	3	glulb
arrdc2	1.06799e-16	0.143303	0.148	0.043	1.79091e-12	3	arrdc2
ccnd1	1.09907e-16	0.140808	0.21	0.076	1.84303e-12	3	ccnd1
tnfrsf19	1.60757e-16	0.139167	0.184	0.061	2.69574e-12	3	tnfrsf19
sdc2	1.64464e-16	0.120542	0.177	0.058	2.7579e-12	3	sdc2
cdh12	1.69573e-16	0.178343	0.085	0.017	2.84358e-12	3	cdh1
nrp1a	1.73559e-16	0.185732	0.177	0.059	2.91042e-12	3	nrp1a
serinc5	1.91191e-16	0.204822	0.187	0.064	3.20608e-12	3	serinc5
prss351	3.23089e-16	0.204405	0.246	0.097	5.41788e-12	3	prss35
socs3b	4.51139e-16	0.481897	0.341	0.167	7.56515e-12	3	socs3b
ckap4	5.07593e-16	0.170039	0.295	0.132	8.51183e-12	3	ckap4
ctdspla	7.92366e-16	0.200396	0.279	0.121	1.32872e-11	3	ctdspla
si:ch1073-291c23.2	1.09588e-15	0.333269	0.518	0.311	1.83769e-11	3	si:ch1073-291c23.2
tmem106ba	1.13278e-15	0.133853	0.18	0.062	1.89956e-11	3	tmem106ba
add3a	1.34272e-15	0.257374	0.364	0.183	2.2516e-11	3	add3a
mych	1.58428e-15	0.256444	0.193	0.07	2.65668e-11	3	mych
gnsa	1.69422e-15	0.137986	0.226	0.089	2.84103e-11	3	gnsa
eif4ebp3l	1.83641e-15	0.374419	0.311	0.149	3.07947e-11	3	eif4ebp3l
cldn7a	2.18313e-15	0.191321	0.111	0.028	3.66089e-11	3	cldn7a
CU468917.11	2.25677e-15	0.204284	0.272	0.115	3.78439e-11	3	CU468917.1
fbln51	3.16868e-15	0.350064	0.397	0.216	5.31356e-11	3	fbln5
tcima	5.09868e-15	0.301026	0.089	0.019	8.54998e-11	3	tcima
grk41	5.73616e-15	0.173456	0.259	0.113	9.61896e-11	3	grk4
rab10	2.53571e-14	0.179599	0.275	0.125	4.25214e-10	3	rab10
map3k14a	2.55738e-14	0.127733	0.167	0.058	4.28847e-10	3	map3k14a
gsdf	3.81013e-14	0.610306	0.098	0.025	6.38921e-10	3	gsdf
tns2b	4.30286e-14	0.128473	0.17	0.061	7.21547e-10	3	tns2b
c6	4.5389e-14	0.196044	0.272	0.126	7.61128e-10	3	c6
pnrc21	9.53329e-14	0.415843	0.685	0.544	1.59864e-09	3	pnrc2
lama41	1.23689e-13	0.194425	0.361	0.186	2.07414e-09	3	lama4
slc39a13	1.51965e-13	0.133357	0.098	0.025	2.5483e-09	3	slc39a13
cyp1c21	1.73014e-13	0.175954	0.095	0.024	2.90127e-09	3	cyp1c2
colec121	1.7402e-13	0.230821	0.423	0.244	2.91814e-09	3	colec12
map1lc3a	3.4558e-13	0.185135	0.226	0.095	5.79503e-09	3	map1lc3a
smu1b	4.13382e-13	0.103746	0.095	0.025	6.932e-09	3	smu1b
fn1b1	5.19255e-13	0.420103	0.351	0.192	8.70739e-09	3	fn1b
tenm3	5.23525e-13	0.142886	0.17	0.064	8.77899e-09	3	tenm3
napsa	6.62501e-13	0.10888	0.128	0.04	1.11095e-08	3	napsa
tuba8l31	7.62665e-13	0.138613	0.275	0.128	1.27891e-08	3	tuba8l3
tmem198b	8.87801e-13	0.1017	0.092	0.024	1.48875e-08	3	tmem198b
gmnn	1.55314e-12	0.1462	0.066	0.013	2.60446e-08	3	gmnn
si:ch211-133n4.4	1.60442e-12	0.146351	0.262	0.123	2.69045e-08	3	si:ch211-133n4.4
ccn11	1.91603e-12	0.631224	0.554	0.383	3.213e-08	3	ccn1
psap1	2.05651e-12	0.190183	0.125	0.04	3.44856e-08	3	psap
cxcl8b.3	2.56071e-12	0.123522	0.062	0.012	4.29405e-08	3	cxcl8b.3
sparc1	2.61982e-12	0.461453	0.905	0.902	4.39317e-08	3	sparc
anxa2a	2.78233e-12	0.346746	0.318	0.164	4.66569e-08	3	anxa2a
meis1b	4.10848e-12	0.202686	0.37	0.208	6.8895e-08	3	meis1b
pon3.2.1	4.13107e-12	0.123279	0.138	0.047	6.9274e-08	3	pon3.2.1
raraa	4.21538e-12	0.110845	0.203	0.085	7.06877e-08	3	raraa
si:ch211-195m9.31	5.1007e-12	0.144754	0.148	0.053	8.55336e-08	3	si:ch211-195m9.3
anxa13	6.92729e-12	0.241358	0.292	0.149	1.16164e-07	3	anxa13
serpinh2	8.21906e-12	0.130698	0.239	0.111	1.37825e-07	3	serpinh2
il11ra	8.27432e-12	0.146144	0.22	0.099	1.38752e-07	3	il11ra
cd164	1.04899e-11	0.122103	0.128	0.043	1.75906e-07	3	cd164
tent5c	1.05122e-11	0.108722	0.059	0.012	1.76279e-07	3	tent5c
cxcl8a	1.05448e-11	0.156997	0.052	0.009	1.76825e-07	3	cxcl8a
kcne41	1.28106e-11	0.202296	0.102	0.03	2.14821e-07	3	kcne4
fxyd11	1.30343e-11	0.270705	0.361	0.207	2.18572e-07	3	fxyd1
spon1b	1.58668e-11	0.247558	0.321	0.181	2.66071e-07	3	spon1b
rhogb	1.62087e-11	0.139855	0.243	0.115	2.71803e-07	3	rhogb
lrrc17	1.66853e-11	0.283273	0.285	0.154	2.79796e-07	3	lrrc17
rdh10b	1.76602e-11	0.160852	0.059	0.012	2.96144e-07	3	rdh10b
nrarpa1	2.24819e-11	0.148471	0.085	0.023	3.76998e-07	3	nrarpa
creb3l3l	2.82044e-11	0.167045	0.249	0.122	4.72959e-07	3	creb3l3l
smad7	3.41095e-11	0.110205	0.18	0.074	5.71982e-07	3	smad7
cyp2ad31	3.42916e-11	0.259525	0.354	0.207	5.75036e-07	3	cyp2ad3
rab5aa	3.51261e-11	0.125299	0.138	0.049	5.8903e-07	3	rab5aa
zfp36l2	5.15828e-11	0.228593	0.21	0.095	8.64992e-07	3	zfp36l2
zgc:1583431	7.51245e-11	0.432281	0.289	0.155	1.25976e-06	3	zgc:158343
agtr21	9.17372e-11	0.118118	0.216	0.099	1.53834e-06	3	agtr2
proza	9.61262e-11	0.174081	0.334	0.184	1.61194e-06	3	proza
cst31	1.08536e-10	0.327088	0.587	0.447	1.82004e-06	3	cst3
mbnl3	1.61347e-10	0.104207	0.118	0.04	2.70563e-06	3	mbnl3
arl4d	1.6798e-10	0.120411	0.085	0.024	2.81686e-06	3	arl4d
capn2a	1.70829e-10	0.193932	0.315	0.173	2.86463e-06	3	capn2a
creb3l2	1.92837e-10	0.12837	0.226	0.107	3.23368e-06	3	creb3l2
zgc:158564	2.22735e-10	0.101925	0.17	0.071	3.73504e-06	3	zgc:158564
dusp11	2.25461e-10	0.276617	0.226	0.109	3.78075e-06	3	dusp1
FP102018.1	2.8713e-10	0.103073	0.138	0.052	4.81489e-06	3	FP102018.1
tpst1	3.68361e-10	0.112566	0.174	0.075	6.17704e-06	3	tpst1
glipr2l1	3.7789e-10	0.155583	0.085	0.025	6.33683e-06	3	glipr2l
degs1	4.62462e-10	0.125332	0.193	0.087	7.75503e-06	3	degs1
tagln2	5.0523e-10	0.295924	0.348	0.209	8.47221e-06	3	tagln2
cyp2n13	5.89195e-10	0.113697	0.174	0.075	9.88022e-06	3	cyp2n13
gnaia	7.47683e-10	0.100283	0.115	0.04	1.25379e-05	3	gnaia
synm	1.74501e-09	0.113022	0.144	0.059	2.92621e-05	3	synm
notch31	2.41731e-09	0.164873	0.151	0.062	4.05358e-05	3	notch3
c41	2.48381e-09	0.286204	0.4	0.252	4.16511e-05	3	c4
nfil3-61	2.68536e-09	0.106545	0.098	0.033	4.50308e-05	3	nfil3-6
cxcl18b	3.12609e-09	0.542711	0.42	0.285	5.24215e-05	3	cxcl18b
aoc21	3.25713e-09	0.320402	0.22	0.113	5.46188e-05	3	aoc2
anxa11a	4.38878e-09	0.158785	0.18	0.084	7.35954e-05	3	anxa11a
zfyve21	4.82934e-09	0.1195	0.167	0.074	8.09831e-05	3	zfyve21
txnipa	4.90931e-09	0.29221	0.449	0.311	8.23242e-05	3	txnipa
gstt1b	6.77082e-09	0.157444	0.157	0.069	0.00011354	3	gstt1b
cdkn1bb	9.00698e-09	0.136941	0.164	0.073	0.000151038	3	cdkn1bb
si:ch73-335l21.41	1.03042e-08	0.542049	0.472	0.336	0.000172791	3	si:ch73-335l21.4
aplp1	1.19732e-08	0.119717	0.197	0.097	0.000200778	3	aplp1
si:ch211-212k18.81	1.60803e-08	0.209198	0.38	0.249	0.00026965	3	si:ch211-212k18.8
sdf4	1.9463e-08	0.106031	0.17	0.08	0.000326375	3	sdf4
nid1a	4.12088e-08	0.175215	0.305	0.179	0.00069103	3	nid1a
cyp2p6	4.3388e-08	0.198024	0.279	0.167	0.000727573	3	cyp2p6
col4a11	5.61017e-08	0.198385	0.315	0.191	0.000940769	3	col4a1
nccrp1	6.05705e-08	0.109797	0.134	0.058	0.00101571	3	nccrp1
plecb	6.48502e-08	0.171002	0.266	0.152	0.00108747	3	plecb
cavin2a	6.86914e-08	0.144331	0.279	0.163	0.00115189	3	cavin2a
mdkb1	7.6978e-08	0.112548	0.079	0.026	0.00129084	3	mdkb
anxa3b	8.18991e-08	0.180358	0.2	0.104	0.00137337	3	anxa3b
si:dkey-177p2.6	9.03984e-08	0.110893	0.256	0.143	0.00151589	3	si:dkey-177p2.6
klf11b	9.13918e-08	0.226102	0.21	0.112	0.00153255	3	klf11b
zfhx31	9.47091e-08	0.125769	0.141	0.063	0.00158818	3	zfhx3
reep5	1.23926e-07	0.193223	0.269	0.158	0.00207811	3	reep5
gbp	1.29254e-07	0.144407	0.154	0.071	0.00216746	3	gbp
pttg1ipb	1.30215e-07	0.128258	0.164	0.078	0.00218358	3	pttg1ipb
pbx1a	1.73845e-07	0.226099	0.344	0.232	0.0029152	3	pbx1a
TCIM (1 of many)1	1.85746e-07	0.198552	0.066	0.02	0.00311477	3	TCIM (1 of many)
ahr2	2.43865e-07	0.105441	0.239	0.134	0.00408937	3	ahr2
dedd11	2.67685e-07	0.190089	0.361	0.232	0.00448882	3	dedd1
dusp5	2.77766e-07	0.114489	0.052	0.014	0.00465786	3	dusp5
tmem59	3.16935e-07	0.104151	0.115	0.048	0.00531468	3	tmem59
col4a6	3.223e-07	0.133136	0.098	0.039	0.00540465	3	col4a6
nfia	3.97482e-07	0.138564	0.298	0.187	0.00666538	3	nfia
CU459056.1	4.6408e-07	0.109096	0.17	0.086	0.00778216	3	CU459056.1
ece1	5.91825e-07	0.101925	0.154	0.076	0.00992431	3	ece1
ywhah	6.28563e-07	0.114893	0.19	0.102	0.0105404	3	ywhah
mmp14a	8.1274e-07	0.156121	0.246	0.142	0.0136288	3	mmp14a
tmem1761	8.31258e-07	0.169671	0.439	0.306	0.0139394	3	tmem176
lipf	8.3786e-07	0.153828	0.243	0.143	0.0140501	3	lipf
ginm1	9.32491e-07	0.101991	0.148	0.07	0.0156369	3	ginm1
tspan7	9.93593e-07	0.136004	0.174	0.091	0.0166616	3	tspan7
atp1a1a.1	1.06085e-06	0.144597	0.118	0.052	0.0177893	3	atp1a1a.1
antxr2a1	1.10165e-06	0.148291	0.407	0.285	0.0184736	3	antxr2a
slco2b1	1.20984e-06	0.209213	0.243	0.146	0.0202878	3	slco2b1
arf2a	1.40347e-06	0.104567	0.095	0.039	0.0235348	3	arf2a
si:ch211-1a19.3	1.68242e-06	0.11637	0.207	0.113	0.0282125	3	si:ch211-1a19.3
DDX17	1.78383e-06	0.117294	0.174	0.091	0.029913	3	DDX17
col4a21	1.84176e-06	0.126752	0.269	0.162	0.0308845	3	col4a2
CABZ01068358.11	1.98989e-06	0.138747	0.148	0.073	0.0333684	3	CABZ01068358.1
cdon	2.34726e-06	0.112869	0.298	0.189	0.0393612	3	cdon
sdcbp2	2.62101e-06	0.178911	0.305	0.2	0.0439517	3	sdcbp2
zfand5a	2.73857e-06	0.127947	0.161	0.084	0.045923	3	zfand5a
sqstm11	3.70364e-06	0.111849	0.128	0.061	0.0621063	3	sqstm1
rab2a	4.40382e-06	0.139594	0.19	0.107	0.0738477	3	rab2a
pim11	4.47182e-06	0.198213	0.311	0.197	0.0749879	3	pim1
soul5	4.65177e-06	0.125423	0.243	0.148	0.0780056	3	soul5
hspb11	5.25845e-06	0.471924	0.58	0.512	0.0881789	3	hspb1
cdc42l	5.7023e-06	0.109636	0.164	0.087	0.0956219	3	cdc42l
perp	7.12656e-06	0.14492	0.174	0.096	0.119505	3	perp
ctsk	8.40291e-06	0.103528	0.203	0.118	0.140908	3	ctsk
gnb1a	1.61437e-05	0.149194	0.272	0.178	0.270713	3	gnb1a
jund1	1.73188e-05	0.190267	0.364	0.26	0.29042	3	jund
b2ml1	2.00769e-05	0.162802	0.731	0.687	0.336669	3	b2ml
ppt11	2.35523e-05	0.104478	0.161	0.088	0.394948	3	ppt1
gabarapb	2.81208e-05	0.162856	0.311	0.216	0.471558	3	gabarapb
pho	3.26994e-05	0.138393	0.187	0.109	0.548336	3	pho
gas1a	3.56513e-05	0.115287	0.302	0.206	0.597837	3	gas1a
gstp11	3.73045e-05	0.109189	0.157	0.087	0.625559	3	gstp1
dnajb1b1	5.2011e-05	0.250631	0.603	0.492	0.872173	3	dnajb1b
tnrc6c11	5.57215e-05	0.110668	0.266	0.171	0.934393	3	tnrc6c1
nr4a11	5.63036e-05	0.130442	0.056	0.021	0.944155	3	nr4a1
h3f3d	6.50466e-05	0.176157	0.289	0.193	1	3	h3f3d
sntb2	6.55654e-05	0.11779	0.321	0.225	1	3	sntb2
bccip	7.1969e-05	0.116922	0.148	0.084	1	3	bccip
amotl2a	8.21439e-05	0.112704	0.118	0.061	1	3	amotl2a
il15ra	8.69553e-05	0.126977	0.223	0.146	1	3	il15ra
nupr1b	0.00010269	0.294037	0.069	0.029	1	3	nupr1b
ier2b1	0.000112198	0.281941	0.472	0.368	1	3	ier2b
cpxm1a	0.000126096	0.129577	0.2	0.128	1	3	cpxm1a
tgm1l11	0.000145481	0.183658	0.295	0.217	1	3	tgm1l1
si:dkey-7j14.61	0.000165807	0.128478	0.626	0.516	1	3	si:dkey-7j14.6
appa	0.000230228	0.207639	0.148	0.09	1	3	appa
tmem200b	0.000234589	0.109357	0.2	0.13	1	3	tmem200b
id1	0.00024454	0.423054	0.344	0.253	1	3	id1
selenop1	0.000246005	0.156443	0.574	0.501	1	3	selenop
tob1a1	0.00027043	0.141215	0.167	0.102	1	3	tob1a
anxa11b	0.000293154	0.12363	0.213	0.14	1	3	anxa11b
ddx51	0.000341989	0.14433	0.174	0.108	1	3	ddx5
olfml3b	0.000517942	0.167179	0.269	0.199	1	3	olfml3b
btg22	0.000588735	0.224194	0.862	0.811	1	3	btg2
rgs5b1	0.00109499	0.44104	0.118	0.069	1	3	rgs5b
higd1a1	0.00116265	0.133136	0.236	0.167	1	3	higd1a
cst14a.2	0.00153656	0.113383	0.128	0.079	1	3	cst14a.2
gadd45ba1	0.00159293	0.34975	0.577	0.509	1	3	gadd45ba
hsd3b7	0.00165527	0.139096	0.089	0.049	1	3	hsd3b7
gabarapa	0.00170107	0.101935	0.161	0.105	1	3	gabarapa
vcam1b1	0.00178195	0.140259	0.236	0.171	1	3	vcam1b
nfkbiab	0.00191707	0.153576	0.216	0.15	1	3	nfkbiab
col6a2	0.0032762	0.265307	0.374	0.328	1	3	col6a2
egr11	0.0033823	0.177222	0.472	0.388	1	3	egr1
lgals3b	0.00346964	0.168804	0.243	0.183	1	3	lgals3b
nupr1a	0.00354881	0.124779	0.197	0.139	1	3	nupr1a
mt21	0.00557716	0.121833	0.069	0.037	1	3	mt2
oaz1a	0.00613357	0.161872	0.164	0.116	1	3	oaz1a
cfd	0.0077194	0.728948	0.111	0.072	1	3	cfd
col6a1	0.00858274	0.301924	0.387	0.358	1	3	col6a1
socs3a1	0.00891371	0.205356	0.757	0.716	1	3	socs3a
tmem176l.11	0.0092941	0.117324	0.58	0.514	1	3	tmem176l.1
pcna	0	1.84004	0.752	0.026	0	4	pcna
stmn1a	0	1.59519	0.647	0.027	0	4	stmn1a
hmgb2b	0	1.38541	0.719	0.063	0	4	hmgb2b
tubb2b	0	1.12756	0.508	0.022	0	4	tubb2b
mcm6	0	0.895729	0.703	0.036	0	4	mcm6
mcm5	0	0.842119	0.528	0.021	0	4	mcm5
mcm4	0	0.766003	0.508	0.023	0	4	mcm4
mcm3	0	0.682958	0.591	0.031	0	4	mcm3
rpa2	0	0.625392	0.393	0.008	0	4	rpa2
fen1	0	0.60332	0.386	0.008	0	4	fen1
si:ch211-156b7.4	2.11241e-267	0.503402	0.343	0.009	3.5423e-263	4	si:ch211-156b7.4
chaf1a	3.24346e-258	0.50727	0.356	0.011	5.43896e-254	4	chaf1a
mcm2	4.64509e-247	0.795103	0.528	0.039	7.78935e-243	4	mcm2
hmgb2a1	3.89102e-239	1.34673	0.663	0.075	6.52486e-235	4	hmgb2a
cdca7a	2.76898e-236	0.70099	0.426	0.023	4.64331e-232	4	cdca7a
selenoh	6.63318e-217	0.863459	0.545	0.051	1.11232e-212	4	selenoh
hells	8.14496e-216	0.528287	0.333	0.013	1.36583e-211	4	hells
zgc:110540	5.32551e-215	0.454325	0.261	0.006	8.93035e-211	4	zgc:110540
dnajc9	8.87737e-214	0.418206	0.261	0.006	1.48865e-209	4	dnajc9
h2afvb	4.07054e-211	1.17649	0.607	0.071	6.82589e-207	4	h2afvb
FP101861.1	8.30922e-210	0.291022	0.284	0.008	1.39337e-205	4	FP101861.1
banf1	1.2789e-198	0.664415	0.475	0.041	2.14459e-194	4	banf1
rbbp4	1.20614e-192	0.462804	0.287	0.011	2.02258e-188	4	rbbp4
cbx5	1.4558e-188	0.661507	0.541	0.06	2.44124e-184	4	cbx5
dut	1.1932e-180	0.586988	0.251	0.008	2.00087e-176	4	dut
seta	4.99943e-178	0.801114	0.597	0.081	8.38354e-174	4	seta
dnph1	8.58344e-177	0.285156	0.29	0.013	1.43936e-172	4	dnph1
hmga1a	1.35654e-171	0.890025	0.475	0.05	2.27478e-167	4	hmga1a
rpa1	1.68554e-167	0.393041	0.267	0.011	2.82647e-163	4	rpa1
si:ch211-288g17.3	1.01692e-166	0.871461	0.604	0.089	1.70528e-162	4	si:ch211-288g17.3
hmgn2	6.23504e-159	1.99789	0.911	0.279	1.04555e-154	4	hmgn2
CABZ01005379.1	1.4697e-154	0.320053	0.337	0.025	2.46454e-150	4	CABZ01005379.1
tuba8l41	8.58994e-150	1.1881	0.693	0.142	1.44045e-145	4	tuba8l4
si:ch211-161h7.4	5.64499e-147	0.243931	0.271	0.015	9.46609e-143	4	si:ch211-161h7.4
tuba8l	2.10932e-144	0.863177	0.386	0.038	3.53713e-140	4	tuba8l
lig1	4.03574e-143	0.394774	0.254	0.013	6.76754e-139	4	lig1
si:dkey-6i22.5	4.43518e-139	0.273022	0.228	0.01	7.43735e-135	4	si:dkey-6i22.5
rrm1	3.18249e-137	0.342556	0.208	0.008	5.33672e-133	4	rrm1
si:ch73-281n10.2	1.00641e-135	1.15746	0.653	0.135	1.68765e-131	4	si:ch73-281n10.2
prim2	1.78145e-135	0.286785	0.317	0.025	2.98731e-131	4	prim2
gins4	3.18455e-134	0.235703	0.261	0.016	5.34018e-130	4	gins4
parp1	1.21637e-132	0.288431	0.327	0.028	2.03973e-128	4	parp1
mis12	1.79901e-131	0.203664	0.211	0.009	3.01675e-127	4	mis12
sumo3b	1.95067e-130	0.400411	0.284	0.02	3.27108e-126	4	sumo3b
rpa3	2.32125e-124	0.434457	0.274	0.02	3.8925e-120	4	rpa3
asf1ba	1.49306e-121	0.314419	0.165	0.005	2.50371e-117	4	asf1ba
anp32b	2.26606e-119	0.413617	0.314	0.029	3.79995e-115	4	anp32b
nudt1	1.72769e-116	0.250452	0.274	0.022	2.89716e-112	4	nudt1
pola1	1.22997e-111	0.257009	0.267	0.022	2.06254e-107	4	pola1
sub1a	1.31162e-111	0.566557	0.538	0.103	2.19946e-107	4	sub1a
h3f3a	2.93928e-111	0.889643	0.333	0.038	4.92888e-107	4	h3f3a
dhfr	8.26586e-111	0.315206	0.188	0.009	1.3861e-106	4	dhfr
setb	1.12234e-110	0.591344	0.449	0.07	1.88205e-106	4	setb
ubr7	3.11467e-110	0.342261	0.234	0.016	5.22299e-106	4	ubr7
npm1a	6.65336e-110	0.681892	0.426	0.065	1.1157e-105	4	npm1a
hnrnpa0b	9.17486e-108	0.620351	0.508	0.094	1.53853e-103	4	hnrnpa0b
dek	7.12375e-106	0.39611	0.439	0.071	1.19458e-101	4	dek
rnaseh2a	4.34174e-104	0.254933	0.178	0.009	7.28066e-100	4	rnaseh2a
orc4	4.16722e-103	0.191949	0.145	0.005	6.98801e-99	4	orc4
atad2	4.08152e-101	0.20652	0.188	0.011	6.8443e-97	4	atad2
orc5	6.06982e-101	0.213471	0.228	0.017	1.01785e-96	4	orc5
msh6	2.61897e-98	0.237058	0.221	0.017	4.39175e-94	4	msh6
gins2	3.46466e-98	0.213312	0.155	0.006	5.80988e-94	4	gins2
uhrf1	2.37434e-95	0.233004	0.231	0.019	3.98152e-91	4	uhrf1
baz1b	6.99794e-95	0.283053	0.32	0.04	1.17348e-90	4	baz1b
tyms	2.76383e-94	0.219568	0.125	0.003	4.63466e-90	4	tyms
rfc5	3.55575e-93	0.254332	0.231	0.02	5.96264e-89	4	rfc5
ranbp1	7.58376e-91	0.558095	0.604	0.151	1.27172e-86	4	ranbp1
rfc4	7.12167e-90	0.213501	0.152	0.007	1.19423e-85	4	rfc4
chtf8	3.29272e-88	0.200804	0.145	0.007	5.52157e-84	4	chtf8
hspd1	2.99496e-87	0.410838	0.271	0.031	5.02225e-83	4	hspd1
lmnb2	4.57719e-87	0.241723	0.29	0.036	7.67549e-83	4	lmnb2
spc25	1.30554e-86	0.177584	0.152	0.008	2.18927e-82	4	spc25
mki67	2.57555e-86	0.345202	0.139	0.006	4.31894e-82	4	mki67
cbx1a	2.6471e-86	0.391675	0.353	0.054	4.43893e-82	4	cbx1a
cnbpa	1.40988e-84	0.438864	0.419	0.079	2.36422e-80	4	cnbpa
dctd	1.52846e-82	0.16784	0.188	0.014	2.56308e-78	4	dctd
gins1	8.63282e-82	0.17124	0.168	0.011	1.44764e-77	4	gins1
rfc3	1.69171e-81	0.226384	0.158	0.01	2.83682e-77	4	rfc3
hnrnpabb	4.42971e-80	0.67292	0.373	0.064	7.42818e-76	4	hnrnpabb
hmgb1b	7.24402e-78	0.585796	0.535	0.136	1.21475e-73	4	hmgb1b
pole	1.46828e-77	0.171904	0.175	0.013	2.46216e-73	4	pole
snrpg	2.16698e-77	0.247943	0.178	0.014	3.63381e-73	4	snrpg
cks2	1.52892e-76	0.241456	0.139	0.007	2.56385e-72	4	cks2
hmgn7	1.68055e-76	0.626556	0.785	0.302	2.81811e-72	4	hmgn7
si:dkey-30c15.10	9.06889e-76	0.183812	0.182	0.015	1.52076e-71	4	si:dkey-30c15.10
slc38a5a	1.66984e-75	0.159187	0.182	0.015	2.80016e-71	4	slc38a5a
lrwd1	9.23203e-75	0.155896	0.168	0.013	1.54812e-70	4	lrwd1
snrpd2	5.66747e-74	0.350111	0.277	0.039	9.50379e-70	4	snrpd2
sp100.1	4.12055e-73	0.13162	0.149	0.01	6.90974e-69	4	sp100.1
ptmab1	2.31248e-72	0.919913	0.673	0.24	3.8778e-68	4	ptmab
arpp19b	2.71168e-72	0.284546	0.195	0.019	4.54722e-68	4	arpp19b
hnrnpaba	2.85202e-72	0.543884	0.498	0.123	4.78256e-68	4	hnrnpaba
msna	4.4075e-72	0.59184	0.627	0.197	7.39094e-68	4	msna
si:ch211-222l21.11	8.97841e-72	0.636676	0.974	0.769	1.50559e-67	4	si:ch211-222l21.1
rnaseh2c	1.21884e-71	0.213486	0.158	0.012	2.04387e-67	4	rnaseh2c
unga	3.62488e-71	0.169901	0.109	0.004	6.07857e-67	4	unga
calm3a	6.34518e-71	0.584258	0.578	0.168	1.06402e-66	4	calm3a
cirbpa1	7.50861e-71	0.71397	0.551	0.158	1.25912e-66	4	cirbpa
zgc:171506	6.47612e-69	0.149177	0.168	0.014	1.08598e-64	4	zgc:171506
cenpw	9.37029e-69	0.13638	0.122	0.006	1.5713e-64	4	cenpw
ube2t	1.23827e-68	0.127898	0.076	0.001	2.07646e-64	4	ube2t
cbx3a	3.47223e-67	0.398178	0.413	0.09	5.82259e-63	4	cbx3a
calm3b	4.16394e-67	0.382062	0.343	0.065	6.98251e-63	4	calm3b
tuba1b	3.41868e-66	0.404556	0.257	0.038	5.73278e-62	4	tuba1b
snrpd1	1.06133e-65	0.331545	0.182	0.018	1.77974e-61	4	snrpd1
ywhaqb	2.16672e-64	0.400582	0.436	0.106	3.63337e-60	4	ywhaqb
rrm2.1	2.63149e-64	0.734986	0.165	0.015	4.41275e-60	4	rrm2.1
adssl	5.80442e-64	0.225723	0.145	0.011	9.73343e-60	4	adssl
cnot9	1.85037e-63	0.179154	0.211	0.026	3.10288e-59	4	cnot9
chaf1b	4.09127e-63	0.144535	0.116	0.006	6.86064e-59	4	chaf1b
atrx	1.41443e-60	0.37016	0.333	0.068	2.37185e-56	4	atrx
nucks1b	1.79011e-59	0.347261	0.376	0.084	3.00184e-55	4	nucks1b
dbf4	4.19311e-59	0.126099	0.142	0.012	7.03143e-55	4	dbf4
mybl2b	6.58899e-59	0.123978	0.139	0.011	1.10491e-54	4	mybl2b
pole3	1.40084e-58	0.209707	0.182	0.021	2.34906e-54	4	pole3
eif4a1a	3.80215e-58	0.407867	0.274	0.047	6.37582e-54	4	eif4a1a
suv39h1b	3.98269e-58	0.140183	0.099	0.005	6.67857e-54	4	suv39h1b
CABZ01058261.1	3.71241e-57	0.176825	0.125	0.009	6.22534e-53	4	CABZ01058261.1
h2afva	3.99562e-57	0.348324	0.188	0.023	6.70026e-53	4	h2afva
nop58	7.86707e-57	0.337762	0.34	0.073	1.31923e-52	4	nop58
rfc2	1.06796e-56	0.142068	0.106	0.006	1.79086e-52	4	rfc2
cdca7b	1.08979e-56	0.215979	0.162	0.016	1.82747e-52	4	cdca7b
fbl	1.12403e-56	0.318416	0.231	0.035	1.88488e-52	4	fbl
snrpf	4.30619e-56	0.378996	0.413	0.105	7.22106e-52	4	snrpf
pole4	1.43832e-55	0.187132	0.132	0.011	2.41192e-51	4	pole4
pbk	2.48048e-55	0.134861	0.122	0.009	4.15952e-51	4	pbk
hspe11	4.90679e-55	0.527856	0.465	0.13	8.2282e-51	4	hspe1
dnmt1	1.83902e-54	0.250846	0.175	0.02	3.08385e-50	4	dnmt1
rad21a	4.96996e-53	0.34068	0.284	0.056	8.33413e-49	4	rad21a
hirip3	5.20087e-53	0.220749	0.165	0.019	8.72134e-49	4	hirip3
si:ch211-153a8.4	1.36488e-52	0.118577	0.129	0.011	2.28877e-48	4	si:ch211-153a8.4
eif3ba	1.46402e-52	0.423697	0.535	0.18	2.45501e-48	4	eif3ba
rad50	2.98822e-52	0.150213	0.175	0.022	5.01095e-48	4	rad50
syncripl	1.25013e-51	0.186387	0.248	0.044	2.09634e-47	4	syncripl
lbr	1.73825e-51	0.331024	0.251	0.046	2.91487e-47	4	lbr
TXN	7.01078e-51	0.5458	0.713	0.305	1.17564e-46	4	TXN
nop10	1.94321e-50	0.266969	0.244	0.043	3.25856e-46	4	nop10
hdac1	8.58097e-50	0.325208	0.3	0.065	1.43894e-45	4	hdac1
zgc:165515	1.29259e-49	0.137539	0.162	0.019	2.16754e-45	4	zgc:165515
pola2	1.48785e-49	0.124587	0.135	0.013	2.49498e-45	4	pola2
pclaf	2.87234e-49	0.190005	0.112	0.009	4.81662e-45	4	pclaf
zgc:112496	2.96675e-49	0.213816	0.254	0.048	4.97494e-45	4	zgc:112496
rpl9	5.4595e-49	0.159093	0.188	0.027	9.15503e-45	4	rpl9
cks1b	5.61243e-49	0.171041	0.086	0.004	9.41149e-45	4	cks1b
cdk1	1.42454e-48	0.28347	0.089	0.005	2.38881e-44	4	cdk1
cenpf	2.36053e-48	0.29249	0.122	0.011	3.95838e-44	4	cenpf
cenpn	5.00408e-48	0.124776	0.132	0.013	8.39134e-44	4	cenpn
srsf3b	3.96528e-47	0.282803	0.297	0.065	6.64938e-43	4	srsf3b
gid8a	5.26869e-47	0.157236	0.198	0.031	8.83507e-43	4	gid8a
khdrbs1a1	8.20419e-47	0.561384	0.482	0.155	1.37576e-42	4	khdrbs1a
nucks1a	2.42155e-46	0.338037	0.32	0.077	4.0607e-42	4	nucks1a
nusap1	3.1201e-46	0.267218	0.083	0.004	5.2321e-42	4	nusap1
etf1b	7.26005e-46	0.300358	0.281	0.06	1.21744e-41	4	etf1b
paxip1	7.49262e-45	0.127928	0.158	0.021	1.25644e-40	4	paxip1
hspa5	8.02683e-45	0.415588	0.234	0.044	1.34602e-40	4	hspa5
parp2	9.3776e-45	0.130366	0.149	0.018	1.57253e-40	4	parp2
ivns1abpb	1.84417e-44	0.184129	0.135	0.015	3.09248e-40	4	ivns1abpb
spc24	2.95906e-44	0.10549	0.066	0.002	4.96206e-40	4	spc24
srsf11	3.43082e-43	0.274185	0.241	0.049	5.75314e-39	4	srsf11
swi5	3.75828e-43	0.101601	0.112	0.01	6.30225e-39	4	swi5
polr2d	4.25268e-43	0.173311	0.152	0.02	7.13131e-39	4	polr2d
uprt	1.48834e-42	0.167024	0.195	0.033	2.49579e-38	4	uprt
syncrip	1.87188e-42	0.359492	0.462	0.154	3.13896e-38	4	syncrip
ppm1g	3.13416e-42	0.218798	0.201	0.035	5.25567e-38	4	ppm1g
atf4a	3.19839e-42	0.390652	0.31	0.079	5.36339e-38	4	atf4a
phb2b	3.43219e-42	0.138478	0.152	0.02	5.75545e-38	4	phb2b
nsmce2	5.08687e-42	0.133437	0.162	0.023	8.53018e-38	4	nsmce2
hint1	8.02746e-42	0.284832	0.297	0.072	1.34612e-37	4	hint1
txnrd3	8.4082e-42	0.172475	0.139	0.017	1.40997e-37	4	txnrd3
eif2s2	5.86571e-41	0.321094	0.366	0.106	9.83621e-37	4	eif2s2
prps1b	8.62015e-41	0.122837	0.155	0.022	1.44551e-36	4	prps1b
emilin1a1	1.78993e-40	0.322026	0.432	0.143	3.00153e-36	4	emilin1a
api5	2.68341e-40	0.177954	0.165	0.025	4.49981e-36	4	api5
snrpb	3.39735e-40	0.332968	0.205	0.038	5.69702e-36	4	snrpb
ppp2cb	7.49309e-40	0.284297	0.31	0.081	1.25652e-35	4	ppp2cb
arhgef39	1.0088e-39	0.119524	0.102	0.009	1.69166e-35	4	arhgef39
myclb	1.71315e-39	0.30337	0.337	0.092	2.87278e-35	4	myclb
pa2g4a	1.95682e-39	0.209122	0.175	0.029	3.2814e-35	4	pa2g4a
rtn4a	2.21706e-39	0.272282	0.337	0.092	3.71779e-35	4	rtn4a
dkc1	2.66215e-39	0.238936	0.208	0.04	4.46415e-35	4	dkc1
cdkn1a	3.44424e-39	0.25456	0.241	0.053	5.77565e-35	4	cdkn1a
sephs1	3.8684e-39	0.169112	0.234	0.05	6.48693e-35	4	sephs1
h3f3d1	1.13853e-38	0.475227	0.502	0.181	1.90921e-34	4	h3f3d
calr3b	1.16418e-38	0.220151	0.251	0.057	1.95222e-34	4	calr3b
nop2	1.19514e-38	0.189645	0.205	0.039	2.00413e-34	4	nop2
sumo3a	2.00033e-38	0.377826	0.287	0.074	3.35436e-34	4	sumo3a
btg3	2.02948e-38	0.247602	0.205	0.04	3.40323e-34	4	btg3
rbm8a	2.24349e-38	0.224885	0.287	0.071	3.76212e-34	4	rbm8a
hnrnpr	3.0114e-38	0.186234	0.139	0.019	5.04981e-34	4	hnrnpr
hnrnpa0l.11	3.85833e-38	0.537967	0.564	0.226	6.47004e-34	4	hnrnpa0l.1
si:ch1073-228h2.2	3.87507e-38	0.100275	0.109	0.011	6.4981e-34	4	si:ch1073-228h2.2
dck	4.07335e-38	0.125265	0.069	0.004	6.83061e-34	4	dck
hnrnpa1b	4.78595e-38	0.358624	0.287	0.073	8.02556e-34	4	hnrnpa1b
pgrmc11	5.51345e-38	0.495872	0.71	0.347	9.2455e-34	4	pgrmc1
shmt1	1.79488e-37	0.145204	0.112	0.012	3.00983e-33	4	shmt1
tert	1.88389e-37	0.113665	0.122	0.015	3.15909e-33	4	tert
mcmbp	2.2509e-37	0.124736	0.079	0.006	3.77453e-33	4	mcmbp
tfam	2.43562e-37	0.175978	0.172	0.029	4.08429e-33	4	tfam
psmb1	2.4982e-37	0.250687	0.215	0.044	4.18923e-33	4	psmb1
zrsr2	3.35427e-37	0.131555	0.158	0.025	5.62477e-33	4	zrsr2
prxl2b	4.79474e-37	0.119634	0.122	0.015	8.0403e-33	4	prxl2b
pold2	6.96092e-37	0.102169	0.099	0.01	1.16728e-32	4	pold2
col18a1a1	1.0208e-36	0.519835	0.66	0.298	1.71179e-32	4	col18a1a
colec111	1.224e-36	0.456467	0.446	0.158	2.05253e-32	4	colec11
srsf2a	1.79003e-36	0.290028	0.182	0.033	3.00169e-32	4	srsf2a
prmt1	1.91384e-36	0.256577	0.178	0.032	3.20932e-32	4	prmt1
eif4a3	2.07782e-36	0.218026	0.228	0.05	3.4843e-32	4	eif4a3
asf1bb	2.23088e-36	0.123221	0.089	0.008	3.74097e-32	4	asf1bb
tma7	2.24814e-36	0.311999	0.238	0.055	3.76991e-32	4	tma7
denr	2.50071e-36	0.188586	0.162	0.027	4.19344e-32	4	denr
larp4ab	2.7515e-36	0.18298	0.201	0.04	4.61399e-32	4	larp4ab
rimkla	3.44357e-36	0.165373	0.228	0.051	5.77453e-32	4	rimkla
casp8ap2	5.09741e-36	0.153084	0.195	0.038	8.54785e-32	4	casp8ap2
h2afx	5.38908e-36	0.181435	0.135	0.019	9.03696e-32	4	h2afx
tubg1	8.49573e-36	0.134023	0.175	0.031	1.42465e-31	4	tubg1
thbs1b	9.67125e-36	0.157667	0.178	0.032	1.62177e-31	4	thbs1b
mt-nd1	2.61222e-35	0.537124	0.554	0.228	4.38043e-31	4	mt-nd1
atp5mc3a	2.89628e-35	0.205863	0.198	0.04	4.85677e-31	4	atp5mc3a
ncaph2	5.13056e-35	0.110467	0.132	0.019	8.60344e-31	4	ncaph2
e2f3	9.35756e-35	0.121244	0.132	0.019	1.56917e-30	4	e2f3
smc2	1.89017e-34	0.154474	0.079	0.006	3.16962e-30	4	smc2
ostc	1.94844e-34	0.169792	0.139	0.021	3.26734e-30	4	ostc
ran1	2.45321e-34	0.47539	0.733	0.38	4.11379e-30	4	ran
cdk2	3.88302e-34	0.107672	0.086	0.008	6.51143e-30	4	cdk2
BX663503.1	4.65256e-34	0.129108	0.142	0.022	7.80188e-30	4	BX663503.1
ggt5a	4.98227e-34	0.154967	0.168	0.031	8.35477e-30	4	ggt5a
zgc:163080	6.05045e-34	0.199289	0.211	0.046	1.0146e-29	4	zgc:163080
smc1al	9.58137e-34	0.227747	0.191	0.039	1.6067e-29	4	smc1al
ndufb8	2.12503e-33	0.220353	0.294	0.081	3.56346e-29	4	ndufb8
pagr1	2.77359e-33	0.134579	0.162	0.029	4.65104e-29	4	pagr1
pold3	4.26509e-33	0.11306	0.139	0.022	7.15214e-29	4	pold3
snu13b	4.70172e-33	0.259624	0.149	0.025	7.88431e-29	4	snu13b
ptges3a	5.37206e-33	0.128577	0.152	0.026	9.0084e-29	4	ptges3a
nap1l1	5.98806e-33	0.257616	0.208	0.046	1.00414e-28	4	nap1l1
yeats4	6.4094e-33	0.113621	0.129	0.019	1.07479e-28	4	yeats4
trmt112	8.19913e-33	0.17764	0.139	0.022	1.37491e-28	4	trmt112
znf207b	8.34369e-33	0.132928	0.168	0.031	1.39915e-28	4	znf207b
slc43a1a	9.65884e-33	0.127928	0.129	0.019	1.61969e-28	4	slc43a1a
morf4l1	1.18402e-32	0.246832	0.271	0.073	1.98549e-28	4	morf4l1
atic	1.38886e-32	0.168242	0.099	0.011	2.32898e-28	4	atic
mt-atp6	1.71802e-32	0.553896	0.792	0.454	2.88095e-28	4	mt-atp6
tmem107.1	2.15869e-32	0.110361	0.135	0.021	3.61991e-28	4	tmem107.1
cd99l2	5.58892e-32	0.136285	0.191	0.041	9.37207e-28	4	cd99l2
uck2b	9.66867e-32	0.106063	0.073	0.006	1.62134e-27	4	uck2b
hdgfl2	1.29308e-31	0.164552	0.234	0.059	2.16837e-27	4	hdgfl2
BX511111.1	1.38156e-31	0.176279	0.271	0.076	2.31674e-27	4	BX511111.1
cdc6	1.59806e-31	0.11656	0.086	0.008	2.67979e-27	4	cdc6
nasp	1.80447e-31	0.29091	0.139	0.022	3.02591e-27	4	nasp
magoh	1.91935e-31	0.16813	0.135	0.022	3.21856e-27	4	magoh
hypk	2.14424e-31	0.215988	0.231	0.057	3.59568e-27	4	hypk
taf15	5.13546e-31	0.245553	0.158	0.029	8.61166e-27	4	taf15
manf	5.33921e-31	0.129915	0.073	0.006	8.95333e-27	4	manf
ewsr1a	5.55217e-31	0.153189	0.188	0.041	9.31043e-27	4	ewsr1a
selenot2	6.27318e-31	0.151147	0.205	0.047	1.05195e-26	4	selenot2
atp5f1b2	6.92552e-31	0.376942	0.406	0.147	1.16134e-26	4	atp5f1b
lsm7	1.14911e-30	0.223064	0.172	0.035	1.92694e-26	4	lsm7
mdc1	1.23384e-30	0.182285	0.238	0.063	2.06903e-26	4	mdc1
UTP14C	1.35592e-30	0.129481	0.132	0.021	2.27374e-26	4	UTP14C
lin37	1.64457e-30	0.10389	0.102	0.013	2.75779e-26	4	lin37
smc3	1.89036e-30	0.118619	0.106	0.014	3.16995e-26	4	smc3
myl12.1	2.31732e-30	0.342212	0.581	0.254	3.88592e-26	4	myl12.1
psmb7	4.29365e-30	0.179201	0.155	0.029	7.20002e-26	4	psmb7
dynll1	5.04625e-30	0.454816	0.323	0.105	8.46206e-26	4	dynll1
prdx4	5.71613e-30	0.233924	0.224	0.057	9.58539e-26	4	prdx4
zgc:194627	6.28702e-30	0.164478	0.092	0.011	1.05427e-25	4	zgc:194627
nhp2	7.87963e-30	0.183344	0.155	0.029	1.32134e-25	4	nhp2
si:ch211-266i6.3	8.59113e-30	0.176737	0.152	0.029	1.44065e-25	4	si:ch211-266i6.3
supt16h	1.17009e-29	0.155197	0.125	0.02	1.96213e-25	4	supt16h
abce1	1.73789e-29	0.122183	0.092	0.011	2.91426e-25	4	abce1
hat1	1.74944e-29	0.113289	0.089	0.01	2.93363e-25	4	hat1
pa2g4b	2.01022e-29	0.207668	0.205	0.049	3.37094e-25	4	pa2g4b
ddost	2.55617e-29	0.16821	0.132	0.022	4.28644e-25	4	ddost
cox6a1	4.19968e-29	0.286793	0.281	0.085	7.04244e-25	4	cox6a1
zgc:56304	4.96005e-29	0.194315	0.162	0.033	8.31751e-25	4	zgc:56304
ssb	5.71596e-29	0.152164	0.112	0.016	9.5851e-25	4	ssb
sub1b	5.90224e-29	0.176593	0.182	0.04	9.89747e-25	4	sub1b
MZT1	6.83996e-29	0.128294	0.165	0.034	1.14699e-24	4	MZT1
cyp19a1a1	7.24282e-29	0.656476	0.31	0.101	1.21455e-24	4	cyp19a1a
crk	9.92305e-29	0.142119	0.188	0.043	1.664e-24	4	crk
aurkb	1.36603e-28	0.148903	0.092	0.011	2.2907e-24	4	aurkb
psmd1	1.37524e-28	0.132115	0.109	0.016	2.30613e-24	4	psmd1
pfn2l	1.61498e-28	0.264334	0.37	0.132	2.70815e-24	4	pfn2l
orc6	2.01911e-28	0.120441	0.086	0.01	3.38585e-24	4	orc6
cfl12	2.08671e-28	0.45819	0.647	0.318	3.4992e-24	4	cfl1
top2a	3.30865e-28	0.281196	0.069	0.006	5.54827e-24	4	top2a
ywhabb	3.39331e-28	0.265992	0.396	0.149	5.69024e-24	4	ywhabb
ddx39ab	3.73494e-28	0.237574	0.145	0.027	6.26312e-24	4	ddx39ab
emd	9.05324e-28	0.208331	0.393	0.151	1.51814e-23	4	emd
tmpob	1.49204e-27	0.108017	0.142	0.027	2.50199e-23	4	tmpob
aspm	1.90547e-27	0.236645	0.102	0.015	3.19528e-23	4	aspm
psmb3	2.10163e-27	0.189099	0.149	0.029	3.52422e-23	4	psmb3
dclre1b	2.19645e-27	0.113764	0.142	0.027	3.68322e-23	4	dclre1b
gng5	3.0743e-27	0.240468	0.297	0.096	5.1553e-23	4	gng5
si:dkey-230p4.1	3.39392e-27	0.128606	0.145	0.028	5.69127e-23	4	si:dkey-230p4.1
reep51	3.82415e-27	0.258549	0.399	0.151	6.41271e-23	4	reep5
abcf1	4.05916e-27	0.157792	0.119	0.02	6.80681e-23	4	abcf1
twnk	4.45774e-27	0.103728	0.135	0.025	7.47519e-23	4	twnk
rnaseh2b	5.25198e-27	0.101411	0.066	0.006	8.80704e-23	4	rnaseh2b
clic41	6.2275e-27	0.240516	0.416	0.16	1.04429e-22	4	clic4
psma5	6.31427e-27	0.187694	0.191	0.046	1.05884e-22	4	psma5
hnrnpul1	7.11505e-27	0.139213	0.218	0.058	1.19312e-22	4	hnrnpul1
h3f3b.1.11	8.03822e-27	0.3003	0.545	0.247	1.34793e-22	4	h3f3b.1.1
srsf1a	1.21887e-26	0.144469	0.145	0.028	2.04393e-22	4	srsf1a
atp5pd1	1.36645e-26	0.255157	0.33	0.117	2.2914e-22	4	atp5pd
jam2b1	1.44639e-26	0.379175	0.7	0.37	2.42544e-22	4	jam2b
ssr3	1.73285e-26	0.26864	0.449	0.181	2.90581e-22	4	ssr3
si:ch211-51e12.7	1.82344e-26	0.179319	0.178	0.041	3.05772e-22	4	si:ch211-51e12.7
tcp1	7.48606e-26	0.239641	0.38	0.143	1.25534e-21	4	tcp1
pdia6	1.08315e-25	0.19738	0.135	0.026	1.81633e-21	4	pdia6
rbx1	1.39769e-25	0.193626	0.195	0.049	2.34379e-21	4	rbx1
ncapd2	1.62859e-25	0.127866	0.076	0.008	2.73099e-21	4	ncapd2
ncl	2.07984e-25	0.341872	0.416	0.173	3.48769e-21	4	ncl
marcksb	2.69538e-25	0.20694	0.116	0.02	4.51988e-21	4	marcksb
ube2nb	2.73799e-25	0.175175	0.168	0.039	4.59133e-21	4	ube2nb
mibp	3.20428e-25	0.236348	0.079	0.009	5.37325e-21	4	mibp
gnl3	3.55864e-25	0.109118	0.129	0.024	5.96748e-21	4	gnl3
aldh1a21	3.77541e-25	0.380104	0.706	0.367	6.33098e-21	4	aldh1a2
ndnf1	4.80408e-25	0.358944	0.772	0.423	8.05596e-21	4	ndnf
fstl31	5.83068e-25	0.312634	0.317	0.112	9.77747e-21	4	fstl3
phf20b	6.21212e-25	0.160103	0.264	0.085	1.04171e-20	4	phf20b
tspan2a	6.75145e-25	0.1069	0.132	0.026	1.13215e-20	4	tspan2a
mtpn	7.62495e-25	0.232289	0.221	0.064	1.27863e-20	4	mtpn
anos1b	9.27501e-25	0.163571	0.231	0.069	1.55533e-20	4	anos1b
ube2f	9.3036e-25	0.150056	0.221	0.064	1.56012e-20	4	ube2f
alyref	1.06959e-24	0.300477	0.185	0.046	1.7936e-20	4	alyref
hist1h4l.12	1.09864e-24	0.103307	0.076	0.009	1.8423e-20	4	hist1h4l.12
mlh1	1.14538e-24	0.100452	0.132	0.026	1.92068e-20	4	mlh1
rangap1a	1.16024e-24	0.123544	0.191	0.049	1.94561e-20	4	rangap1a
bcl7bb	1.55164e-24	0.15566	0.271	0.089	2.60194e-20	4	bcl7bb
ddx52	1.58384e-24	0.27834	0.297	0.101	2.65594e-20	4	ddx5
snrpc	1.74128e-24	0.143952	0.139	0.028	2.91995e-20	4	snrpc
calr	1.7527e-24	0.177922	0.211	0.06	2.93911e-20	4	calr
slc29a1a1	1.77734e-24	0.277081	0.67	0.321	2.98042e-20	4	slc29a1a
zgc:91910	1.83888e-24	0.183408	0.241	0.072	3.08362e-20	4	zgc:91910
ipo9	1.89102e-24	0.100934	0.135	0.027	3.17106e-20	4	ipo9
irf10	1.93989e-24	0.109406	0.132	0.026	3.253e-20	4	irf10
gnb1b	2.31377e-24	0.261359	0.492	0.219	3.87996e-20	4	gnb1b
si:ch73-308l14.2	2.91489e-24	0.163473	0.254	0.081	4.88797e-20	4	si:ch73-308l14.2
rbm4.2	3.75781e-24	0.138118	0.125	0.024	6.30147e-20	4	rbm4.2
rwdd1	4.05203e-24	0.201406	0.178	0.045	6.79485e-20	4	rwdd1
llph	4.06174e-24	0.108832	0.142	0.03	6.81113e-20	4	llph
hnrnpa0a	4.79683e-24	0.20852	0.264	0.086	8.0438e-20	4	hnrnpa0a
prpf19	4.8212e-24	0.110174	0.092	0.013	8.08467e-20	4	prpf19
nid1b1	6.59637e-24	0.353488	0.891	0.575	1.10615e-19	4	nid1b
BX649250.1	9.35351e-24	0.104759	0.129	0.025	1.56849e-19	4	BX649250.1
BX511111.2	1.34366e-23	0.123823	0.185	0.048	2.25319e-19	4	BX511111.2
ifi30	1.4284e-23	0.253552	0.333	0.121	2.39529e-19	4	ifi30
fam3a	1.69351e-23	0.144629	0.251	0.08	2.83984e-19	4	fam3a
ywhabl	1.80872e-23	0.224999	0.416	0.172	3.03304e-19	4	ywhabl
polr2f	2.08593e-23	0.191428	0.185	0.049	3.4979e-19	4	polr2f
ywhae2	2.44596e-23	0.127651	0.175	0.045	4.10163e-19	4	ywhae2
oaz1a1	2.48526e-23	0.249373	0.307	0.107	4.16754e-19	4	oaz1a
selenof	3.02385e-23	0.230686	0.281	0.097	5.07069e-19	4	selenof
ilf2	3.87878e-23	0.18479	0.149	0.033	6.50432e-19	4	ilf2
nop56	5.01678e-23	0.251245	0.333	0.128	8.41263e-19	4	nop56
emg1	6.30914e-23	0.105786	0.149	0.034	1.05798e-18	4	emg1
pabpn11	6.61188e-23	0.280235	0.498	0.226	1.10875e-18	4	pabpn1
camlg	8.04835e-23	0.11113	0.145	0.033	1.34963e-18	4	camlg
tmed2	1.84064e-22	0.195689	0.281	0.096	3.08657e-18	4	tmed2
nutf2l	1.88476e-22	0.189368	0.106	0.019	3.16055e-18	4	nutf2l
gars	2.16335e-22	0.133358	0.172	0.045	3.62773e-18	4	gars
cox7a2a1	2.42556e-22	0.168071	0.155	0.037	4.06743e-18	4	cox7a2a
neil1	3.00715e-22	0.127743	0.191	0.054	5.04269e-18	4	neil1
cnbpb	3.15241e-22	0.283418	0.541	0.266	5.28627e-18	4	cnbpb
asph	3.22077e-22	0.136117	0.178	0.048	5.40091e-18	4	asph
phf6	3.9821e-22	0.113227	0.175	0.046	6.67758e-18	4	phf6
phc2a1	4.05674e-22	0.289302	0.568	0.27	6.80275e-18	4	phc2a
bud31	4.44755e-22	0.142405	0.162	0.04	7.4581e-18	4	bud31
psma6l	4.59381e-22	0.140988	0.224	0.07	7.70336e-18	4	psma6l
usp10	6.15168e-22	0.147878	0.135	0.029	1.03158e-17	4	usp10
skp1	6.15171e-22	0.19316	0.383	0.153	1.03158e-17	4	skp1
sap18	6.28552e-22	0.166488	0.158	0.039	1.05402e-17	4	sap18
myh10	6.28835e-22	0.110867	0.129	0.027	1.05449e-17	4	myh10
actb12	9.28855e-22	0.486955	0.805	0.604	1.5576e-17	4	actb1
snrpe	9.58533e-22	0.229035	0.116	0.023	1.60736e-17	4	snrpe
kmt2bb	9.88752e-22	0.152344	0.271	0.094	1.65804e-17	4	kmt2bb
thap12a	1.09166e-21	0.105786	0.145	0.034	1.8306e-17	4	thap12a
ywhaqa	1.3587e-21	0.224153	0.274	0.097	2.27841e-17	4	ywhaqa
tomm6	2.04682e-21	0.107929	0.096	0.016	3.43232e-17	4	tomm6
ddx24	2.13353e-21	0.10112	0.112	0.022	3.57772e-17	4	ddx24
fabp11a1	2.47387e-21	0.43654	0.736	0.45	4.14843e-17	4	fabp11a
atp5f1d	2.80177e-21	0.171724	0.31	0.115	4.69828e-17	4	atp5f1d
kctd5a	2.80835e-21	0.170915	0.29	0.106	4.70932e-17	4	kctd5a
kpnb3	3.17672e-21	0.135786	0.139	0.031	5.32704e-17	4	kpnb3
snrpd3l	3.49306e-21	0.137397	0.129	0.028	5.85751e-17	4	snrpd3l
polr3glb	3.73651e-21	0.14985	0.248	0.085	6.26575e-17	4	polr3glb
zw10	4.6387e-21	0.105136	0.139	0.032	7.77864e-17	4	zw10
rhoaa	4.8795e-21	0.193541	0.373	0.151	8.18244e-17	4	rhoaa
eci2	5.40385e-21	0.134538	0.208	0.064	9.06172e-17	4	eci2
mydgf	6.07173e-21	0.121195	0.191	0.056	1.01817e-16	4	mydgf
ss18	6.60291e-21	0.122231	0.106	0.02	1.10724e-16	4	ss18
sem1	7.2477e-21	0.181295	0.317	0.12	1.21537e-16	4	sem1
anp32a	1.00273e-20	0.243578	0.287	0.107	1.68149e-16	4	anp32a
arl6ip1	1.05242e-20	0.219353	0.234	0.076	1.76481e-16	4	arl6ip1
npm1b	1.14326e-20	0.107609	0.168	0.045	1.91713e-16	4	npm1b
prelid3b1	1.25943e-20	0.233284	0.389	0.164	2.11194e-16	4	prelid3b
ccnd2a1	1.32357e-20	0.279136	0.465	0.22	2.21949e-16	4	ccnd2a
degs11	1.40141e-20	0.13782	0.248	0.084	2.35002e-16	4	degs1
lrpap1	1.7288e-20	0.138677	0.215	0.068	2.89902e-16	4	lrpap1
fundc2	1.88855e-20	0.154112	0.221	0.072	3.1669e-16	4	fundc2
si:ch211-198a12.6	1.93565e-20	0.159509	0.142	0.034	3.2459e-16	4	si:ch211-198a12.6
emc1	1.97557e-20	0.102119	0.158	0.041	3.31283e-16	4	emc1
uqcrh	2.13218e-20	0.217847	0.274	0.101	3.57545e-16	4	uqcrh
hhip	2.27572e-20	0.179744	0.205	0.063	3.81616e-16	4	hhip
notum1b1	2.53499e-20	0.346713	0.472	0.235	4.25093e-16	4	notum1b
atp5fa12	2.60548e-20	0.273697	0.284	0.107	4.36914e-16	4	atp5fa1
psme2	2.6594e-20	0.214765	0.162	0.043	4.45955e-16	4	psme2
rbm4.3	2.97086e-20	0.227187	0.188	0.054	4.98183e-16	4	rbm4.3
tmed10	3.31948e-20	0.177789	0.228	0.074	5.56643e-16	4	tmed10
ctsh	3.32991e-20	0.136218	0.224	0.074	5.58392e-16	4	ctsh
si:ch211-136a13.1	3.45143e-20	0.112279	0.149	0.037	5.7877e-16	4	si:ch211-136a13.1
tuba1a	3.61755e-20	0.133015	0.092	0.016	6.06627e-16	4	tuba1a
dcp2	4.67249e-20	0.147617	0.228	0.077	7.8353e-16	4	dcp2
NUMA1	4.80571e-20	0.128431	0.089	0.015	8.05869e-16	4	NUMA1
psmb2	6.71659e-20	0.187904	0.261	0.093	1.12631e-15	4	psmb2
cmtr1	6.84723e-20	0.102851	0.152	0.039	1.14821e-15	4	cmtr1
prkcsh	7.57671e-20	0.101734	0.076	0.011	1.27054e-15	4	prkcsh
polr2l	1.02884e-19	0.160269	0.172	0.048	1.72527e-15	4	polr2l
canx	1.11155e-19	0.165736	0.142	0.036	1.86396e-15	4	canx
pin1	1.12296e-19	0.191299	0.221	0.074	1.88308e-15	4	pin1
tmem258	1.3275e-19	0.211315	0.376	0.161	2.22609e-15	4	tmem258
pwp1	1.7221e-19	0.108816	0.145	0.037	2.88779e-15	4	pwp1
atp5pf1	2.47778e-19	0.180012	0.32	0.127	4.15499e-15	4	atp5pf
[truncated: 824 more rows]

## Sheet: Interstitial I (SC0)
	p_val	avg_logFC	pct.1	pct.2	p_val_adj	cluster	gene
tmem88b	0	1.0569	0.804	0.295	0	0	tmem88b
nid1b	1.15467e-289	0.877836	0.777	0.267	1.93626e-285	0	nid1b
plpp1a	1.11959e-264	0.928355	0.837	0.498	1.87744e-260	0	plpp1a
ndnf	1.79467e-206	0.841696	0.595	0.172	3.00947e-202	0	ndnf
cd81a	1.27003e-198	0.574316	0.927	0.766	2.12971e-194	0	cd81a
tfpia	4.65893e-196	0.733873	0.663	0.265	7.81256e-192	0	tfpia
podxl	3.97413e-187	0.865337	0.718	0.363	6.66422e-183	0	podxl
hsp70.2	8.07639e-168	1.05981	0.821	0.598	1.35433e-163	0	hsp70.2
akap12b	1.34854e-161	0.76843	0.574	0.215	2.26137e-157	0	akap12b
hsp70.1	6.42177e-145	1.04533	0.757	0.55	1.07687e-140	0	hsp70.1
il15	8.99862e-144	0.652131	0.508	0.184	1.50898e-139	0	il15
osr2	3.92299e-141	0.634069	0.512	0.185	6.57846e-137	0	osr2
cxcl14	5.05814e-135	0.738704	0.482	0.152	8.48199e-131	0	cxcl14
slc29a1a	9.33877e-131	0.625321	0.453	0.142	1.56602e-126	0	slc29a1a
hsp70.3	1.20694e-124	0.79916	0.801	0.605	2.02392e-120	0	hsp70.3
si:ch211-197h24.9	1.00739e-122	0.587717	0.511	0.218	1.6893e-118	0	si:ch211-197h24.9
cxcl12a	4.0686e-121	0.276142	0.538	0.237	6.82264e-117	0	cxcl12a
CR751602.2	7.4212e-120	0.545845	0.363	0.082	1.24446e-115	0	CR751602.2
ywhaz	5.76639e-110	0.520064	0.576	0.323	9.66966e-106	0	ywhaz
cd151	3.42456e-108	0.521264	0.413	0.14	5.74264e-104	0	cd151
vat1	1.31157e-107	0.655858	0.522	0.246	2.19937e-103	0	vat1
jam2b	1.82332e-107	0.560791	0.49	0.208	3.05753e-103	0	jam2b
fabp11a	5.98783e-104	0.536175	0.575	0.274	1.0041e-99	0	fabp11a
mhc1zba	1.74529e-103	0.41816	0.778	0.612	2.92668e-99	0	mhc1zba
hsp70l	3.08832e-103	1.07255	0.46	0.196	5.1788e-99	0	hsp70l
phc2a	3.82115e-97	0.610004	0.379	0.122	6.40769e-93	0	phc2a
entpd1	5.49335e-94	0.44529	0.421	0.158	9.2118e-90	0	entpd1
adma	1.25731e-93	0.789558	0.365	0.115	2.10839e-89	0	adma
CR383676.1	1.17057e-91	0.180033	1	0.973	1.96294e-87	0	CR383676.1
itm2bb	1.42923e-91	0.582626	0.421	0.174	2.39668e-87	0	itm2bb
nid2a	1.69742e-91	0.538544	0.434	0.187	2.84641e-87	0	nid2a
bmp4	7.02812e-90	0.368999	0.327	0.091	1.17855e-85	0	bmp4
eif4ebp3	1.32562e-88	0.500969	0.526	0.282	2.22294e-84	0	eif4ebp3
marcksl1a	2.4152e-86	0.246868	0.872	0.763	4.05005e-82	0	marcksl1a
col18a1a	1.56324e-84	0.512284	0.411	0.152	2.62139e-80	0	col18a1a
sall1a	3.1774e-80	0.25401	0.294	0.076	5.32818e-76	0	sall1a
nrxn1a	8.32948e-79	0.292231	0.266	0.06	1.39677e-74	0	nrxn1a
dnajb1b	1.00359e-76	0.565735	0.579	0.355	1.68292e-72	0	dnajb1b
si:ch211-222l21.1	1.34653e-76	0.336548	0.828	0.696	2.258e-72	0	si:ch211-222l21.1
axin2	3.18125e-74	0.27787	0.309	0.095	5.33463e-70	0	axin2
lin7a	5.47613e-74	0.252924	0.268	0.068	9.18292e-70	0	lin7a
tmem98	2.76129e-73	0.255612	0.367	0.141	4.6304e-69	0	tmem98
rab5b	2.76274e-73	0.293952	0.291	0.086	4.63284e-69	0	rab5b
cavin2b	1.53297e-72	0.54453	0.591	0.412	2.57064e-68	0	cavin2b
bnc2	1.83866e-72	0.278978	0.415	0.181	3.08325e-68	0	bnc2
ace	3.07957e-72	0.276661	0.286	0.082	5.16414e-68	0	ace
foxl2a	6.60819e-72	0.21431	0.264	0.066	1.10813e-67	0	foxl2a
ubb	2.82244e-71	0.643958	0.482	0.263	4.73295e-67	0	ubb
tspan18b	2.07952e-70	0.433905	0.37	0.165	3.48715e-66	0	tspan18b
pmp22a	3.00989e-70	0.198004	0.815	0.649	5.04729e-66	0	pmp22a
zeb2b	1.438e-69	0.236042	0.254	0.064	2.41138e-65	0	zeb2b
jun	3.6468e-69	0.38551	0.917	0.858	6.11532e-65	0	jun
ntd5	7.92553e-68	0.341375	0.4	0.174	1.32903e-63	0	ntd5
BX569787.1	7.46925e-67	0.444474	0.316	0.119	1.25252e-62	0	BX569787.1
epha4a	1.33409e-66	0.186846	0.216	0.042	2.23714e-62	0	epha4a
rock2b.1	4.76598e-66	0.233599	0.286	0.091	7.99207e-62	0	rock2b.1
itga9	1.49114e-65	0.246152	0.307	0.106	2.50049e-61	0	itga9
notum1b	1.12752e-64	0.371813	0.323	0.116	1.89073e-60	0	notum1b
junba	6.18602e-64	0.386925	0.903	0.848	1.03733e-59	0	junba
col27a1b	1.3108e-62	0.20381	0.269	0.082	2.19808e-58	0	col27a1b
rgmb	1.33776e-61	0.233352	0.304	0.111	2.24329e-57	0	rgmb
gpc4	1.1462e-59	0.26893	0.34	0.141	1.92206e-55	0	gpc4
abl2	6.98411e-59	0.202287	0.231	0.061	1.17117e-54	0	abl2
magi1b	2.36794e-58	0.208584	0.259	0.081	3.9708e-54	0	magi1b
aldh1a2	4.17e-57	0.353917	0.462	0.251	6.99267e-53	0	aldh1a2
ccbe1	4.60379e-57	0.19469	0.271	0.09	7.7201e-53	0	ccbe1
hsp90aa1.2	1.01192e-56	0.745374	0.407	0.215	1.6969e-52	0	hsp90aa1.2
adamts2	1.75836e-55	0.235551	0.337	0.145	2.9486e-51	0	adamts2
mao	1.1626e-54	0.194698	0.277	0.099	1.94956e-50	0	mao
btg1	3.29317e-53	0.323642	0.628	0.485	5.52231e-49	0	btg1
b3gnt5a	4.82651e-52	0.218989	0.277	0.105	8.09358e-48	0	b3gnt5a
ccn2a	7.26369e-52	0.699645	0.277	0.11	1.21805e-47	0	ccn2a
vwde	3.87156e-51	0.202413	0.267	0.096	6.49221e-47	0	vwde
f3b	2.26502e-49	0.6711	0.472	0.318	3.79821e-45	0	f3b
ssuh2rs1	5.15973e-49	0.170636	0.25	0.089	8.65236e-45	0	ssuh2rs1
gulp1a	5.67234e-49	0.268061	0.292	0.124	9.51194e-45	0	gulp1a
fzd2	1.0268e-48	0.188153	0.309	0.133	1.72183e-44	0	fzd2
tnfsf12	1.24507e-48	0.309176	0.375	0.194	2.08785e-44	0	tnfsf12
cd74b	4.01259e-48	0.511645	0.307	0.136	6.72871e-44	0	cd74b
c4	1.75358e-47	0.309795	0.324	0.147	2.94058e-43	0	c4
nr2f2	4.20373e-47	0.313854	0.388	0.217	7.04924e-43	0	nr2f2
nr0b1	6.58832e-47	0.200566	0.282	0.115	1.1048e-42	0	nr0b1
tjp2b	9.07674e-47	0.324939	0.295	0.134	1.52208e-42	0	tjp2b
pgrmc1	1.78181e-45	0.327957	0.427	0.261	2.98792e-41	0	pgrmc1
ftr82	4.28098e-45	0.242896	0.311	0.145	7.17877e-41	0	ftr82
pcdh7a	8.94612e-45	0.158028	0.189	0.053	1.50017e-40	0	pcdh7a
rsrp1	2.12942e-44	0.356188	0.341	0.182	3.57082e-40	0	rsrp1
dag1	2.08323e-43	0.338849	0.252	0.108	3.49338e-39	0	dag1
sik2b	2.46608e-43	0.159977	0.23	0.082	4.13537e-39	0	sik2b
apof	2.89927e-43	0.189754	0.193	0.057	4.86179e-39	0	apof
tnfaip6	1.0329e-42	0.15143	0.232	0.085	1.73208e-38	0	tnfaip6
aebp1	1.52246e-42	0.192012	0.386	0.206	2.55302e-38	0	aebp1
ccdc85ca	1.60743e-42	0.143395	0.182	0.052	2.6955e-38	0	ccdc85ca
gna12a	2.78005e-42	0.191896	0.272	0.116	4.66186e-38	0	gna12a
ccnd2a	6.12976e-42	0.3312	0.288	0.137	1.0279e-37	0	ccnd2a
jcada	7.42832e-42	0.166184	0.234	0.088	1.24566e-37	0	jcada
hspb1	9.50635e-41	0.496961	0.561	0.436	1.59412e-36	0	hspb1
nr2f1a	1.19615e-40	0.307381	0.336	0.185	2.00582e-36	0	nr2f1a
nme2b.1	2.37497e-40	0.202171	0.952	0.904	3.9826e-36	0	nme2b.1
nt5e	9.94859e-40	0.183197	0.202	0.07	1.66828e-35	0	nt5e
cebpd	8.922e-39	0.481941	0.42	0.271	1.49613e-34	0	cebpd
cd74a	9.87552e-39	0.490922	0.29	0.138	1.65603e-34	0	cd74a
ism1	1.53821e-38	0.153882	0.199	0.069	2.57943e-34	0	ism1
wls	1.72016e-38	0.298519	0.334	0.19	2.88454e-34	0	wls
ecm2	1.84948e-38	0.154768	0.241	0.099	3.10139e-34	0	ecm2
si:dkey-184p18.2	3.4648e-38	0.132796	0.118	0.019	5.81013e-34	0	si:dkey-184p18.2
ITLN1 (1 of many).1	1.36573e-37	0.212334	0.43	0.256	2.29019e-33	0	ITLN1 (1 of many).1
pdgfrl	1.74286e-37	0.136203	0.279	0.126	2.92261e-33	0	pdgfrl
sox4a.1	3.80886e-37	0.36444	0.317	0.175	6.38708e-33	0	sox4a.1
adamts9	7.8898e-37	0.148118	0.188	0.065	1.32304e-32	0	adamts9
mxra8a	2.5811e-36	0.246425	0.288	0.147	4.32824e-32	0	mxra8a
marcksl1b	5.43288e-36	0.257756	0.493	0.316	9.1104e-32	0	marcksl1b
vasnb	9.51937e-36	0.198318	0.2	0.075	1.5963e-31	0	vasnb
raver2	1.82646e-35	0.11688	0.167	0.052	3.0628e-31	0	raver2
arxa	2.86868e-35	0.1003	0.119	0.023	4.81049e-31	0	arxa
fibina	3.28503e-35	0.12706	0.163	0.05	5.50866e-31	0	fibina
sparc	4.09309e-35	0.129025	0.926	0.859	6.8637e-31	0	sparc
myca	6.18571e-35	0.260056	0.253	0.121	1.03728e-30	0	myca
bhlhe40	6.80382e-35	0.397649	0.428	0.294	1.14093e-30	0	bhlhe40
col12a1b	7.65032e-35	0.137235	0.191	0.069	1.28288e-30	0	col12a1b
egfra	3.83374e-34	0.271131	0.256	0.124	6.42879e-30	0	egfra
mfap2	4.13589e-34	0.234767	0.45	0.293	6.93548e-30	0	mfap2
si:dkey-56m19.5	8.13537e-34	0.316919	0.341	0.205	1.36422e-29	0	si:dkey-56m19.5
desi1a	2.1245e-33	0.103634	0.142	0.039	3.56258e-29	0	desi1a
cirbpb	2.37754e-33	0.269399	0.854	0.848	3.9869e-29	0	cirbpb
histh1l	2.70265e-33	0.434442	0.347	0.212	4.53207e-29	0	histh1l
wnt11r	8.52788e-33	0.14503	0.162	0.053	1.43004e-28	0	wnt11r
ugt1b5	1.75351e-32	0.154087	0.275	0.135	2.94047e-28	0	ugt1b5
greb1l	1.77864e-32	0.116658	0.165	0.055	2.9826e-28	0	greb1l
si:busm1-266f07.2	3.41674e-32	0.371963	0.152	0.048	5.72954e-28	0	si:busm1-266f07.2
c6.1	9.2826e-32	0.161631	0.575	0.431	1.5566e-27	0	c6.1
sox6	1.17535e-31	0.210679	0.248	0.122	1.97094e-27	0	sox6
dchs1a	2.76982e-31	0.121179	0.176	0.065	4.64471e-27	0	dchs1a
pleca	7.63619e-31	0.190267	0.377	0.23	1.28051e-26	0	pleca
caskin1	1.32532e-30	0.118993	0.15	0.048	2.22243e-26	0	caskin1
ddit3	1.3898e-30	0.40499	0.36	0.235	2.33055e-26	0	ddit3
ahnak	2.15677e-30	0.297323	0.502	0.387	3.61669e-26	0	ahnak
tbx2a	2.44947e-30	0.170927	0.194	0.08	4.10751e-26	0	tbx2a
sdc4	2.46208e-30	0.370707	0.578	0.511	4.12866e-26	0	sdc4
si:ch211-199g17.2	2.60413e-30	0.210443	0.151	0.052	4.36686e-26	0	si:ch211-199g17.2
tmem176l.1	2.90859e-30	0.234943	0.559	0.446	4.87741e-26	0	tmem176l.1
ifi46	5.61934e-30	0.33694	0.373	0.246	9.42308e-26	0	ifi46
antxr2a	6.05916e-30	0.156017	0.345	0.198	1.01606e-25	0	antxr2a
dkk3b	8.04785e-30	0.264983	0.391	0.264	1.34954e-25	0	dkk3b
BX537313.1	1.68183e-29	0.107973	0.096	0.017	2.82026e-25	0	BX537313.1
ptprk	1.81058e-29	0.157944	0.266	0.137	3.03617e-25	0	ptprk
egr1	1.81911e-29	0.309297	0.441	0.306	3.05047e-25	0	egr1
fam168a	4.86701e-29	0.131307	0.277	0.145	8.1615e-25	0	fam168a
hbegfa	8.82521e-29	0.31472	0.235	0.123	1.4799e-24	0	hbegfa
mgst3b	1.29533e-28	0.272701	0.407	0.302	2.17213e-24	0	mgst3b
ywhag1	2.38583e-28	0.140013	0.252	0.128	4.0008e-24	0	ywhag1
fosab	9.34526e-28	0.211891	0.913	0.893	1.56711e-23	0	fosab
colec11	9.36706e-28	0.306668	0.214	0.103	1.57076e-23	0	colec11
b2ml	9.70015e-28	0.196237	0.718	0.639	1.62662e-23	0	b2ml
btg2	1.57122e-27	0.257776	0.834	0.779	2.63477e-23	0	btg2
FRMD1	1.66975e-27	0.106175	0.154	0.056	2.8e-23	0	FRMD1
dpp3	5.66191e-27	0.201424	0.145	0.052	9.49445e-23	0	dpp3
kank2	6.9861e-27	0.122841	0.242	0.122	1.1715e-22	0	kank2
rhoq	1.10487e-26	0.103153	0.141	0.049	1.85276e-22	0	rhoq
cyp19a1a	1.17756e-26	0.387512	0.147	0.052	1.97464e-22	0	cyp19a1a
si:ch211-204c21.1.1	1.53582e-26	0.120576	0.207	0.096	2.57541e-22	0	si:ch211-204c21.1.1
rdh10a	2.16416e-26	0.14661	0.253	0.131	3.62908e-22	0	rdh10a
krt18b	2.73785e-26	0.296906	0.553	0.45	4.5911e-22	0	krt18b
eva1ba	6.15369e-26	0.134844	0.249	0.131	1.03191e-21	0	eva1ba
ngdn	6.2844e-26	0.233758	0.218	0.113	1.05383e-21	0	ngdn
slc43a2b	8.92939e-26	0.121227	0.161	0.064	1.49737e-21	0	slc43a2b
celf2	1.86932e-25	0.129654	0.291	0.165	3.13467e-21	0	celf2
lurap1	3.45699e-25	0.113291	0.199	0.092	5.79703e-21	0	lurap1
cdh2	5.80358e-25	0.204331	0.372	0.251	9.73203e-21	0	cdh2
dap1b	6.4978e-25	0.343167	0.267	0.159	1.08962e-20	0	dap1b
add3b	2.48379e-24	0.107515	0.192	0.09	4.16506e-20	0	add3b
HACD4	3.5187e-24	0.117383	0.241	0.128	5.9005e-20	0	HACD4
si:dkey-188i13.6	3.8215e-24	0.239926	0.192	0.093	6.40827e-20	0	si:dkey-188i13.6
phactr4a	3.12179e-23	0.123738	0.16	0.069	5.23493e-19	0	phactr4a
zgc:152791	3.37461e-23	0.301681	0.377	0.256	5.65888e-19	0	zgc:152791
klf6a	3.49176e-23	0.250881	0.563	0.475	5.85533e-19	0	klf6a
si:dkey-192g7.3	3.90789e-23	0.17088	0.193	0.094	6.55314e-19	0	si:dkey-192g7.3
lxn	6.85402e-23	0.160512	0.708	0.592	1.14935e-18	0	lxn
rhoab	2.13827e-22	0.293157	0.318	0.209	3.58566e-18	0	rhoab
si:ch211-196l7.4	3.55343e-22	0.303622	0.341	0.245	5.95874e-18	0	si:ch211-196l7.4
fibinb	3.76809e-22	0.137348	0.194	0.098	6.31871e-18	0	fibinb
h1f0	9.0769e-22	0.450122	0.48	0.401	1.52211e-17	0	h1f0
cnn2	1.47065e-21	0.248294	0.261	0.163	2.46614e-17	0	cnn2
fbln5	2.41965e-21	0.209182	0.264	0.159	4.05751e-17	0	fbln5
gsta.1	2.483e-21	0.125371	0.255	0.147	4.16374e-17	0	gsta.1
colec12	7.13941e-21	0.117046	0.296	0.18	1.19721e-16	0	colec12
jam3b	1.10129e-20	0.101013	0.262	0.15	1.84675e-16	0	jam3b
serpine3	2.06972e-20	0.102513	0.173	0.083	3.47071e-16	0	serpine3
tspan4a	3.32039e-20	0.172167	0.226	0.13	5.56796e-16	0	tspan4a
tob1b	3.59537e-20	0.334165	0.359	0.272	6.02907e-16	0	tob1b
mxra8b	5.35044e-20	0.118479	0.266	0.158	8.97216e-16	0	mxra8b
tcf12	1.81085e-19	0.195841	0.228	0.136	3.03661e-15	0	tcf12
snx17	2.42852e-19	0.111844	0.193	0.102	4.07239e-15	0	snx17
sorbs1	2.39051e-18	0.106323	0.217	0.123	4.00865e-14	0	sorbs1
h1fx	3.38083e-18	0.532527	0.341	0.251	5.66931e-14	0	h1fx
rsad2	5.74479e-18	0.192271	0.084	0.026	9.63343e-14	0	rsad2
enc1	9.94252e-18	0.174972	0.184	0.103	1.66726e-13	0	enc1
si:ch211-183d5.2	1.00336e-17	0.115787	0.118	0.049	1.68253e-13	0	si:ch211-183d5.2
bsg	1.56506e-17	0.217015	0.424	0.352	2.62444e-13	0	bsg
gas6	7.32781e-17	0.168332	0.207	0.123	1.2288e-12	0	gas6
timp2a	8.76714e-17	0.225586	0.301	0.221	1.47016e-12	0	timp2a
si:ch211-212k18.8	1.0095e-16	0.10748	0.293	0.191	1.69283e-12	0	si:ch211-212k18.8
fblim1	1.04343e-16	0.106738	0.244	0.149	1.74973e-12	0	fblim1
tgm1l1	2.76096e-16	0.105531	0.256	0.16	4.62985e-12	0	tgm1l1
emilin1a	2.94186e-16	0.125645	0.188	0.106	4.9332e-12	0	emilin1a
zgc:103700	2.97018e-16	0.170407	0.115	0.05	4.9807e-12	0	zgc:103700
si:dkey-7j14.6	3.67033e-16	0.184249	0.543	0.483	6.15478e-12	0	si:dkey-7j14.6
cst3	6.30626e-16	0.177594	0.479	0.411	1.0575e-11	0	cst3
xbp1	9.37012e-16	0.249362	0.314	0.23	1.57128e-11	0	xbp1
ier2b	1.08586e-15	0.316323	0.4	0.326	1.82089e-11	0	ier2b
maff	1.33698e-15	0.112486	0.213	0.129	2.24199e-11	0	maff
rpz5	2.03603e-15	0.284915	0.338	0.251	3.41422e-11	0	rpz5
mcl1b	2.44506e-15	0.178952	0.31	0.221	4.10012e-11	0	mcl1b
svild	2.62644e-15	0.175825	0.188	0.114	4.40428e-11	0	svild
tmem176	2.77072e-15	0.138245	0.348	0.252	4.64622e-11	0	tmem176
capns1b	7.12469e-15	0.212063	0.375	0.302	1.19474e-10	0	capns1b
atf4b	1.4934e-14	0.261062	0.368	0.304	2.50428e-10	0	atf4b
zgc:174863	1.67852e-14	0.175043	0.297	0.215	2.8147e-10	0	zgc:174863
dusp2	2.27629e-14	0.174773	0.245	0.157	3.81711e-10	0	dusp2
serpinb1	8.65029e-14	0.163929	0.23	0.156	1.45057e-09	0	serpinb1
antxr1c	1.53619e-13	0.155532	0.17	0.103	2.57604e-09	0	antxr1c
ppfibp1a	5.23267e-13	0.142921	0.131	0.072	8.77467e-09	0	ppfibp1a
boc	6.27673e-13	0.140832	0.358	0.277	1.05254e-08	0	boc
adipor2	1.0617e-12	0.156477	0.123	0.066	1.78037e-08	0	adipor2
cygb1	1.72554e-12	0.194831	0.263	0.182	2.89355e-08	0	cygb1
map2k6	2.25127e-12	0.142159	0.148	0.087	3.77515e-08	0	map2k6
clic4	2.6451e-12	0.143761	0.198	0.131	4.43556e-08	0	clic4
arrdc3b	3.76843e-12	0.215744	0.162	0.101	6.31927e-08	0	arrdc3b
mt-co3	6.59419e-12	0.119326	0.931	0.938	1.10578e-07	0	mt-co3
fstl3	1.20004e-11	0.15123	0.145	0.086	2.01234e-07	0	fstl3
b2m	1.6802e-11	0.189979	0.551	0.524	2.81753e-07	0	b2m
mt-co2	2.61011e-11	0.121963	0.906	0.914	4.3769e-07	0	mt-co2
slc38a5b	7.26585e-11	0.188051	0.287	0.231	1.21841e-06	0	slc38a5b
cd63	1.15378e-10	0.106785	0.518	0.448	1.93477e-06	0	cd63
hspe1	1.38287e-10	0.172521	0.17	0.11	2.31893e-06	0	hspe1
SERP1	1.40072e-10	0.195063	0.481	0.456	2.34886e-06	0	SERP1
CR936442.1	1.93364e-10	0.107072	0.06	0.023	3.24252e-06	0	CR936442.1
pbx4	3.78666e-10	0.137119	0.147	0.094	6.34985e-06	0	pbx4
itm2ba	5.57989e-10	0.140352	0.489	0.452	9.35691e-06	0	itm2ba
mknk2b	7.59635e-10	0.199884	0.209	0.153	1.27383e-05	0	mknk2b
anxa4	2.40476e-09	0.125533	0.394	0.356	4.03254e-05	0	anxa4
isg15	2.48384e-09	0.330577	0.154	0.101	4.16516e-05	0	isg15
actb1	4.44882e-09	0.25752	0.6	0.642	7.46022e-05	0	actb1
ier5	5.0688e-09	0.214561	0.349	0.3	8.49987e-05	0	ier5
zgc:110182	6.54756e-09	0.155649	0.137	0.089	0.000109796	0	zgc:110182
prelid3b	6.84106e-09	0.163498	0.196	0.14	0.000114718	0	prelid3b
s100v2	7.58203e-09	0.130496	0.416	0.355	0.000127143	0	s100v2
pabpc1b	9.42438e-09	0.186669	0.251	0.204	0.000158038	0	pabpc1b
qkia	1.21649e-08	0.167369	0.239	0.19	0.000203993	0	qkia
srsf5a	1.30424e-08	0.160018	0.35	0.305	0.000218709	0	srsf5a
fthl27	3.94499e-08	0.208909	0.356	0.315	0.000661535	0	fthl27
her9	4.53484e-08	0.242575	0.184	0.132	0.000760448	0	her9
f10	4.63879e-08	0.107348	0.226	0.171	0.000777878	0	f10
ccn1	8.72866e-08	0.217066	0.411	0.359	0.00146371	0	ccn1
h2afx1	9.42382e-08	0.303736	0.353	0.324	0.00158028	0	h2afx1
gadd45ga	1.1705e-07	0.118033	0.054	0.024	0.00196281	0	gadd45ga
h3f3b.1	1.30059e-07	0.132379	0.452	0.424	0.00218096	0	h3f3b.1
ecm1b	1.59148e-07	0.122469	0.114	0.071	0.00266876	0	ecm1b
pabpn1	1.79076e-07	0.163538	0.257	0.213	0.00300292	0	pabpn1
ppp1cb	6.09154e-07	0.111566	0.12	0.082	0.0102149	0	ppp1cb
tsc22d3	7.45448e-07	0.146818	0.13	0.09	0.0125004	0	tsc22d3
serpinh1b	1.32193e-06	0.210427	0.141	0.099	0.0221674	0	serpinh1b
cav1	4.83064e-06	0.114219	0.326	0.277	0.081005	0	cav1
hist2h2l	6.84055e-06	0.236666	0.199	0.164	0.114709	0	hist2h2l
si:ch73-46j18.5	7.15914e-06	0.131294	0.285	0.248	0.120052	0	si:ch73-46j18.5
prdx2	1.1045e-05	0.152471	0.404	0.396	0.185213	0	prdx2
ier2a	1.39353e-05	0.166431	0.39	0.365	0.233681	0	ier2a
dedd1	1.57152e-05	0.130458	0.252	0.216	0.263528	0	dedd1
cebpb	7.31793e-05	0.302964	0.291	0.265	1	0	cebpb
rnf213a	9.17882e-05	0.143817	0.18	0.148	1	0	rnf213a
stat1a	0.000222939	0.124676	0.179	0.15	1	0	stat1a
CT027638.1	0.00174981	0.107722	0.094	0.126	1	0	CT027638.1
ubc	0.00199566	0.145505	0.407	0.426	1	0	ubc

## Sheet: Interstitial II (SC4)
	p_val	avg_logFC	pct.1	pct.2	p_val_adj	cluster	gene
pcna	0	1.84004	0.752	0.026	0	4	pcna
stmn1a	0	1.59519	0.647	0.027	0	4	stmn1a
hmgb2b	0	1.38541	0.719	0.063	0	4	hmgb2b
tubb2b	0	1.12756	0.508	0.022	0	4	tubb2b
mcm6	0	0.895729	0.703	0.036	0	4	mcm6
mcm5	0	0.842119	0.528	0.021	0	4	mcm5
mcm4	0	0.766003	0.508	0.023	0	4	mcm4
mcm3	0	0.682958	0.591	0.031	0	4	mcm3
rpa2	0	0.625392	0.393	0.008	0	4	rpa2
fen1	0	0.60332	0.386	0.008	0	4	fen1
si:ch211-156b7.4	2.11241e-267	0.503402	0.343	0.009	3.5423e-263	4	si:ch211-156b7.4
chaf1a	3.24346e-258	0.50727	0.356	0.011	5.43896e-254	4	chaf1a
mcm2	4.64509e-247	0.795103	0.528	0.039	7.78935e-243	4	mcm2
hmgb2a1	3.89102e-239	1.34673	0.663	0.075	6.52486e-235	4	hmgb2a
cdca7a	2.76898e-236	0.70099	0.426	0.023	4.64331e-232	4	cdca7a
selenoh	6.63318e-217	0.863459	0.545	0.051	1.11232e-212	4	selenoh
hells	8.14496e-216	0.528287	0.333	0.013	1.36583e-211	4	hells
zgc:110540	5.32551e-215	0.454325	0.261	0.006	8.93035e-211	4	zgc:110540
dnajc9	8.87737e-214	0.418206	0.261	0.006	1.48865e-209	4	dnajc9
h2afvb	4.07054e-211	1.17649	0.607	0.071	6.82589e-207	4	h2afvb
FP101861.1	8.30922e-210	0.291022	0.284	0.008	1.39337e-205	4	FP101861.1
banf1	1.2789e-198	0.664415	0.475	0.041	2.14459e-194	4	banf1
rbbp4	1.20614e-192	0.462804	0.287	0.011	2.02258e-188	4	rbbp4
cbx5	1.4558e-188	0.661507	0.541	0.06	2.44124e-184	4	cbx5
dut	1.1932e-180	0.586988	0.251	0.008	2.00087e-176	4	dut
seta	4.99943e-178	0.801114	0.597	0.081	8.38354e-174	4	seta
dnph1	8.58344e-177	0.285156	0.29	0.013	1.43936e-172	4	dnph1
hmga1a	1.35654e-171	0.890025	0.475	0.05	2.27478e-167	4	hmga1a
rpa1	1.68554e-167	0.393041	0.267	0.011	2.82647e-163	4	rpa1
si:ch211-288g17.3	1.01692e-166	0.871461	0.604	0.089	1.70528e-162	4	si:ch211-288g17.3
hmgn2	6.23504e-159	1.99789	0.911	0.279	1.04555e-154	4	hmgn2
CABZ01005379.1	1.4697e-154	0.320053	0.337	0.025	2.46454e-150	4	CABZ01005379.1
tuba8l41	8.58994e-150	1.1881	0.693	0.142	1.44045e-145	4	tuba8l4
si:ch211-161h7.4	5.64499e-147	0.243931	0.271	0.015	9.46609e-143	4	si:ch211-161h7.4
tuba8l	2.10932e-144	0.863177	0.386	0.038	3.53713e-140	4	tuba8l
lig1	4.03574e-143	0.394774	0.254	0.013	6.76754e-139	4	lig1
si:dkey-6i22.5	4.43518e-139	0.273022	0.228	0.01	7.43735e-135	4	si:dkey-6i22.5
rrm1	3.18249e-137	0.342556	0.208	0.008	5.33672e-133	4	rrm1
si:ch73-281n10.2	1.00641e-135	1.15746	0.653	0.135	1.68765e-131	4	si:ch73-281n10.2
prim2	1.78145e-135	0.286785	0.317	0.025	2.98731e-131	4	prim2
gins4	3.18455e-134	0.235703	0.261	0.016	5.34018e-130	4	gins4
parp1	1.21637e-132	0.288431	0.327	0.028	2.03973e-128	4	parp1
mis12	1.79901e-131	0.203664	0.211	0.009	3.01675e-127	4	mis12
sumo3b	1.95067e-130	0.400411	0.284	0.02	3.27108e-126	4	sumo3b
rpa3	2.32125e-124	0.434457	0.274	0.02	3.8925e-120	4	rpa3
asf1ba	1.49306e-121	0.314419	0.165	0.005	2.50371e-117	4	asf1ba
anp32b	2.26606e-119	0.413617	0.314	0.029	3.79995e-115	4	anp32b
nudt1	1.72769e-116	0.250452	0.274	0.022	2.89716e-112	4	nudt1
pola1	1.22997e-111	0.257009	0.267	0.022	2.06254e-107	4	pola1
sub1a	1.31162e-111	0.566557	0.538	0.103	2.19946e-107	4	sub1a
h3f3a	2.93928e-111	0.889643	0.333	0.038	4.92888e-107	4	h3f3a
dhfr	8.26586e-111	0.315206	0.188	0.009	1.3861e-106	4	dhfr
setb	1.12234e-110	0.591344	0.449	0.07	1.88205e-106	4	setb
ubr7	3.11467e-110	0.342261	0.234	0.016	5.22299e-106	4	ubr7
npm1a	6.65336e-110	0.681892	0.426	0.065	1.1157e-105	4	npm1a
hnrnpa0b	9.17486e-108	0.620351	0.508	0.094	1.53853e-103	4	hnrnpa0b
dek	7.12375e-106	0.39611	0.439	0.071	1.19458e-101	4	dek
rnaseh2a	4.34174e-104	0.254933	0.178	0.009	7.28066e-100	4	rnaseh2a
orc4	4.16722e-103	0.191949	0.145	0.005	6.98801e-99	4	orc4
atad2	4.08152e-101	0.20652	0.188	0.011	6.8443e-97	4	atad2
orc5	6.06982e-101	0.213471	0.228	0.017	1.01785e-96	4	orc5
msh6	2.61897e-98	0.237058	0.221	0.017	4.39175e-94	4	msh6
gins2	3.46466e-98	0.213312	0.155	0.006	5.80988e-94	4	gins2
uhrf1	2.37434e-95	0.233004	0.231	0.019	3.98152e-91	4	uhrf1
baz1b	6.99794e-95	0.283053	0.32	0.04	1.17348e-90	4	baz1b
tyms	2.76383e-94	0.219568	0.125	0.003	4.63466e-90	4	tyms
rfc5	3.55575e-93	0.254332	0.231	0.02	5.96264e-89	4	rfc5
ranbp1	7.58376e-91	0.558095	0.604	0.151	1.27172e-86	4	ranbp1
rfc4	7.12167e-90	0.213501	0.152	0.007	1.19423e-85	4	rfc4
chtf8	3.29272e-88	0.200804	0.145	0.007	5.52157e-84	4	chtf8
hspd1	2.99496e-87	0.410838	0.271	0.031	5.02225e-83	4	hspd1
lmnb2	4.57719e-87	0.241723	0.29	0.036	7.67549e-83	4	lmnb2
spc25	1.30554e-86	0.177584	0.152	0.008	2.18927e-82	4	spc25
mki67	2.57555e-86	0.345202	0.139	0.006	4.31894e-82	4	mki67
cbx1a	2.6471e-86	0.391675	0.353	0.054	4.43893e-82	4	cbx1a
cnbpa	1.40988e-84	0.438864	0.419	0.079	2.36422e-80	4	cnbpa
dctd	1.52846e-82	0.16784	0.188	0.014	2.56308e-78	4	dctd
gins1	8.63282e-82	0.17124	0.168	0.011	1.44764e-77	4	gins1
rfc3	1.69171e-81	0.226384	0.158	0.01	2.83682e-77	4	rfc3
hnrnpabb	4.42971e-80	0.67292	0.373	0.064	7.42818e-76	4	hnrnpabb
hmgb1b	7.24402e-78	0.585796	0.535	0.136	1.21475e-73	4	hmgb1b
pole	1.46828e-77	0.171904	0.175	0.013	2.46216e-73	4	pole
snrpg	2.16698e-77	0.247943	0.178	0.014	3.63381e-73	4	snrpg
cks2	1.52892e-76	0.241456	0.139	0.007	2.56385e-72	4	cks2
hmgn7	1.68055e-76	0.626556	0.785	0.302	2.81811e-72	4	hmgn7
si:dkey-30c15.10	9.06889e-76	0.183812	0.182	0.015	1.52076e-71	4	si:dkey-30c15.10
slc38a5a	1.66984e-75	0.159187	0.182	0.015	2.80016e-71	4	slc38a5a
lrwd1	9.23203e-75	0.155896	0.168	0.013	1.54812e-70	4	lrwd1
snrpd2	5.66747e-74	0.350111	0.277	0.039	9.50379e-70	4	snrpd2
sp100.1	4.12055e-73	0.13162	0.149	0.01	6.90974e-69	4	sp100.1
ptmab1	2.31248e-72	0.919913	0.673	0.24	3.8778e-68	4	ptmab
arpp19b	2.71168e-72	0.284546	0.195	0.019	4.54722e-68	4	arpp19b
hnrnpaba	2.85202e-72	0.543884	0.498	0.123	4.78256e-68	4	hnrnpaba
msna	4.4075e-72	0.59184	0.627	0.197	7.39094e-68	4	msna
si:ch211-222l21.11	8.97841e-72	0.636676	0.974	0.769	1.50559e-67	4	si:ch211-222l21.1
rnaseh2c	1.21884e-71	0.213486	0.158	0.012	2.04387e-67	4	rnaseh2c
unga	3.62488e-71	0.169901	0.109	0.004	6.07857e-67	4	unga
calm3a	6.34518e-71	0.584258	0.578	0.168	1.06402e-66	4	calm3a
cirbpa1	7.50861e-71	0.71397	0.551	0.158	1.25912e-66	4	cirbpa
zgc:171506	6.47612e-69	0.149177	0.168	0.014	1.08598e-64	4	zgc:171506
cenpw	9.37029e-69	0.13638	0.122	0.006	1.5713e-64	4	cenpw
ube2t	1.23827e-68	0.127898	0.076	0.001	2.07646e-64	4	ube2t
cbx3a	3.47223e-67	0.398178	0.413	0.09	5.82259e-63	4	cbx3a
calm3b	4.16394e-67	0.382062	0.343	0.065	6.98251e-63	4	calm3b
tuba1b	3.41868e-66	0.404556	0.257	0.038	5.73278e-62	4	tuba1b
snrpd1	1.06133e-65	0.331545	0.182	0.018	1.77974e-61	4	snrpd1
ywhaqb	2.16672e-64	0.400582	0.436	0.106	3.63337e-60	4	ywhaqb
rrm2.1	2.63149e-64	0.734986	0.165	0.015	4.41275e-60	4	rrm2.1
adssl	5.80442e-64	0.225723	0.145	0.011	9.73343e-60	4	adssl
cnot9	1.85037e-63	0.179154	0.211	0.026	3.10288e-59	4	cnot9
chaf1b	4.09127e-63	0.144535	0.116	0.006	6.86064e-59	4	chaf1b
atrx	1.41443e-60	0.37016	0.333	0.068	2.37185e-56	4	atrx
nucks1b	1.79011e-59	0.347261	0.376	0.084	3.00184e-55	4	nucks1b
dbf4	4.19311e-59	0.126099	0.142	0.012	7.03143e-55	4	dbf4
mybl2b	6.58899e-59	0.123978	0.139	0.011	1.10491e-54	4	mybl2b
pole3	1.40084e-58	0.209707	0.182	0.021	2.34906e-54	4	pole3
eif4a1a	3.80215e-58	0.407867	0.274	0.047	6.37582e-54	4	eif4a1a
suv39h1b	3.98269e-58	0.140183	0.099	0.005	6.67857e-54	4	suv39h1b
CABZ01058261.1	3.71241e-57	0.176825	0.125	0.009	6.22534e-53	4	CABZ01058261.1
h2afva	3.99562e-57	0.348324	0.188	0.023	6.70026e-53	4	h2afva
nop58	7.86707e-57	0.337762	0.34	0.073	1.31923e-52	4	nop58
rfc2	1.06796e-56	0.142068	0.106	0.006	1.79086e-52	4	rfc2
cdca7b	1.08979e-56	0.215979	0.162	0.016	1.82747e-52	4	cdca7b
fbl	1.12403e-56	0.318416	0.231	0.035	1.88488e-52	4	fbl
snrpf	4.30619e-56	0.378996	0.413	0.105	7.22106e-52	4	snrpf
pole4	1.43832e-55	0.187132	0.132	0.011	2.41192e-51	4	pole4
pbk	2.48048e-55	0.134861	0.122	0.009	4.15952e-51	4	pbk
hspe11	4.90679e-55	0.527856	0.465	0.13	8.2282e-51	4	hspe1
dnmt1	1.83902e-54	0.250846	0.175	0.02	3.08385e-50	4	dnmt1
rad21a	4.96996e-53	0.34068	0.284	0.056	8.33413e-49	4	rad21a
hirip3	5.20087e-53	0.220749	0.165	0.019	8.72134e-49	4	hirip3
si:ch211-153a8.4	1.36488e-52	0.118577	0.129	0.011	2.28877e-48	4	si:ch211-153a8.4
eif3ba	1.46402e-52	0.423697	0.535	0.18	2.45501e-48	4	eif3ba
rad50	2.98822e-52	0.150213	0.175	0.022	5.01095e-48	4	rad50
syncripl	1.25013e-51	0.186387	0.248	0.044	2.09634e-47	4	syncripl
lbr	1.73825e-51	0.331024	0.251	0.046	2.91487e-47	4	lbr
TXN	7.01078e-51	0.5458	0.713	0.305	1.17564e-46	4	TXN
nop10	1.94321e-50	0.266969	0.244	0.043	3.25856e-46	4	nop10
hdac1	8.58097e-50	0.325208	0.3	0.065	1.43894e-45	4	hdac1
zgc:165515	1.29259e-49	0.137539	0.162	0.019	2.16754e-45	4	zgc:165515
pola2	1.48785e-49	0.124587	0.135	0.013	2.49498e-45	4	pola2
pclaf	2.87234e-49	0.190005	0.112	0.009	4.81662e-45	4	pclaf
zgc:112496	2.96675e-49	0.213816	0.254	0.048	4.97494e-45	4	zgc:112496
rpl9	5.4595e-49	0.159093	0.188	0.027	9.15503e-45	4	rpl9
cks1b	5.61243e-49	0.171041	0.086	0.004	9.41149e-45	4	cks1b
cdk1	1.42454e-48	0.28347	0.089	0.005	2.38881e-44	4	cdk1
cenpf	2.36053e-48	0.29249	0.122	0.011	3.95838e-44	4	cenpf
cenpn	5.00408e-48	0.124776	0.132	0.013	8.39134e-44	4	cenpn
srsf3b	3.96528e-47	0.282803	0.297	0.065	6.64938e-43	4	srsf3b
gid8a	5.26869e-47	0.157236	0.198	0.031	8.83507e-43	4	gid8a
khdrbs1a1	8.20419e-47	0.561384	0.482	0.155	1.37576e-42	4	khdrbs1a
nucks1a	2.42155e-46	0.338037	0.32	0.077	4.0607e-42	4	nucks1a
nusap1	3.1201e-46	0.267218	0.083	0.004	5.2321e-42	4	nusap1
etf1b	7.26005e-46	0.300358	0.281	0.06	1.21744e-41	4	etf1b
paxip1	7.49262e-45	0.127928	0.158	0.021	1.25644e-40	4	paxip1
hspa5	8.02683e-45	0.415588	0.234	0.044	1.34602e-40	4	hspa5
parp2	9.3776e-45	0.130366	0.149	0.018	1.57253e-40	4	parp2
ivns1abpb	1.84417e-44	0.184129	0.135	0.015	3.09248e-40	4	ivns1abpb
spc24	2.95906e-44	0.10549	0.066	0.002	4.96206e-40	4	spc24
srsf11	3.43082e-43	0.274185	0.241	0.049	5.75314e-39	4	srsf11
swi5	3.75828e-43	0.101601	0.112	0.01	6.30225e-39	4	swi5
polr2d	4.25268e-43	0.173311	0.152	0.02	7.13131e-39	4	polr2d
uprt	1.48834e-42	0.167024	0.195	0.033	2.49579e-38	4	uprt
syncrip	1.87188e-42	0.359492	0.462	0.154	3.13896e-38	4	syncrip
ppm1g	3.13416e-42	0.218798	0.201	0.035	5.25567e-38	4	ppm1g
atf4a	3.19839e-42	0.390652	0.31	0.079	5.36339e-38	4	atf4a
phb2b	3.43219e-42	0.138478	0.152	0.02	5.75545e-38	4	phb2b
nsmce2	5.08687e-42	0.133437	0.162	0.023	8.53018e-38	4	nsmce2
hint1	8.02746e-42	0.284832	0.297	0.072	1.34612e-37	4	hint1
txnrd3	8.4082e-42	0.172475	0.139	0.017	1.40997e-37	4	txnrd3
eif2s2	5.86571e-41	0.321094	0.366	0.106	9.83621e-37	4	eif2s2
prps1b	8.62015e-41	0.122837	0.155	0.022	1.44551e-36	4	prps1b
emilin1a1	1.78993e-40	0.322026	0.432	0.143	3.00153e-36	4	emilin1a
api5	2.68341e-40	0.177954	0.165	0.025	4.49981e-36	4	api5
snrpb	3.39735e-40	0.332968	0.205	0.038	5.69702e-36	4	snrpb
ppp2cb	7.49309e-40	0.284297	0.31	0.081	1.25652e-35	4	ppp2cb
arhgef39	1.0088e-39	0.119524	0.102	0.009	1.69166e-35	4	arhgef39
myclb	1.71315e-39	0.30337	0.337	0.092	2.87278e-35	4	myclb
pa2g4a	1.95682e-39	0.209122	0.175	0.029	3.2814e-35	4	pa2g4a
rtn4a	2.21706e-39	0.272282	0.337	0.092	3.71779e-35	4	rtn4a
dkc1	2.66215e-39	0.238936	0.208	0.04	4.46415e-35	4	dkc1
cdkn1a	3.44424e-39	0.25456	0.241	0.053	5.77565e-35	4	cdkn1a
sephs1	3.8684e-39	0.169112	0.234	0.05	6.48693e-35	4	sephs1
h3f3d1	1.13853e-38	0.475227	0.502	0.181	1.90921e-34	4	h3f3d
calr3b	1.16418e-38	0.220151	0.251	0.057	1.95222e-34	4	calr3b
nop2	1.19514e-38	0.189645	0.205	0.039	2.00413e-34	4	nop2
sumo3a	2.00033e-38	0.377826	0.287	0.074	3.35436e-34	4	sumo3a
btg3	2.02948e-38	0.247602	0.205	0.04	3.40323e-34	4	btg3
rbm8a	2.24349e-38	0.224885	0.287	0.071	3.76212e-34	4	rbm8a
hnrnpr	3.0114e-38	0.186234	0.139	0.019	5.04981e-34	4	hnrnpr
hnrnpa0l.11	3.85833e-38	0.537967	0.564	0.226	6.47004e-34	4	hnrnpa0l.1
si:ch1073-228h2.2	3.87507e-38	0.100275	0.109	0.011	6.4981e-34	4	si:ch1073-228h2.2
dck	4.07335e-38	0.125265	0.069	0.004	6.83061e-34	4	dck
hnrnpa1b	4.78595e-38	0.358624	0.287	0.073	8.02556e-34	4	hnrnpa1b
pgrmc11	5.51345e-38	0.495872	0.71	0.347	9.2455e-34	4	pgrmc1
shmt1	1.79488e-37	0.145204	0.112	0.012	3.00983e-33	4	shmt1
tert	1.88389e-37	0.113665	0.122	0.015	3.15909e-33	4	tert
mcmbp	2.2509e-37	0.124736	0.079	0.006	3.77453e-33	4	mcmbp
tfam	2.43562e-37	0.175978	0.172	0.029	4.08429e-33	4	tfam
psmb1	2.4982e-37	0.250687	0.215	0.044	4.18923e-33	4	psmb1
zrsr2	3.35427e-37	0.131555	0.158	0.025	5.62477e-33	4	zrsr2
prxl2b	4.79474e-37	0.119634	0.122	0.015	8.0403e-33	4	prxl2b
pold2	6.96092e-37	0.102169	0.099	0.01	1.16728e-32	4	pold2
col18a1a1	1.0208e-36	0.519835	0.66	0.298	1.71179e-32	4	col18a1a
colec111	1.224e-36	0.456467	0.446	0.158	2.05253e-32	4	colec11
srsf2a	1.79003e-36	0.290028	0.182	0.033	3.00169e-32	4	srsf2a
prmt1	1.91384e-36	0.256577	0.178	0.032	3.20932e-32	4	prmt1
eif4a3	2.07782e-36	0.218026	0.228	0.05	3.4843e-32	4	eif4a3
asf1bb	2.23088e-36	0.123221	0.089	0.008	3.74097e-32	4	asf1bb
tma7	2.24814e-36	0.311999	0.238	0.055	3.76991e-32	4	tma7
denr	2.50071e-36	0.188586	0.162	0.027	4.19344e-32	4	denr
larp4ab	2.7515e-36	0.18298	0.201	0.04	4.61399e-32	4	larp4ab
rimkla	3.44357e-36	0.165373	0.228	0.051	5.77453e-32	4	rimkla
casp8ap2	5.09741e-36	0.153084	0.195	0.038	8.54785e-32	4	casp8ap2
h2afx	5.38908e-36	0.181435	0.135	0.019	9.03696e-32	4	h2afx
tubg1	8.49573e-36	0.134023	0.175	0.031	1.42465e-31	4	tubg1
thbs1b	9.67125e-36	0.157667	0.178	0.032	1.62177e-31	4	thbs1b
mt-nd1	2.61222e-35	0.537124	0.554	0.228	4.38043e-31	4	mt-nd1
atp5mc3a	2.89628e-35	0.205863	0.198	0.04	4.85677e-31	4	atp5mc3a
ncaph2	5.13056e-35	0.110467	0.132	0.019	8.60344e-31	4	ncaph2
e2f3	9.35756e-35	0.121244	0.132	0.019	1.56917e-30	4	e2f3
smc2	1.89017e-34	0.154474	0.079	0.006	3.16962e-30	4	smc2
ostc	1.94844e-34	0.169792	0.139	0.021	3.26734e-30	4	ostc
ran1	2.45321e-34	0.47539	0.733	0.38	4.11379e-30	4	ran
cdk2	3.88302e-34	0.107672	0.086	0.008	6.51143e-30	4	cdk2
BX663503.1	4.65256e-34	0.129108	0.142	0.022	7.80188e-30	4	BX663503.1
ggt5a	4.98227e-34	0.154967	0.168	0.031	8.35477e-30	4	ggt5a
zgc:163080	6.05045e-34	0.199289	0.211	0.046	1.0146e-29	4	zgc:163080
smc1al	9.58137e-34	0.227747	0.191	0.039	1.6067e-29	4	smc1al
ndufb8	2.12503e-33	0.220353	0.294	0.081	3.56346e-29	4	ndufb8
pagr1	2.77359e-33	0.134579	0.162	0.029	4.65104e-29	4	pagr1
pold3	4.26509e-33	0.11306	0.139	0.022	7.15214e-29	4	pold3
snu13b	4.70172e-33	0.259624	0.149	0.025	7.88431e-29	4	snu13b
ptges3a	5.37206e-33	0.128577	0.152	0.026	9.0084e-29	4	ptges3a
nap1l1	5.98806e-33	0.257616	0.208	0.046	1.00414e-28	4	nap1l1
yeats4	6.4094e-33	0.113621	0.129	0.019	1.07479e-28	4	yeats4
trmt112	8.19913e-33	0.17764	0.139	0.022	1.37491e-28	4	trmt112
znf207b	8.34369e-33	0.132928	0.168	0.031	1.39915e-28	4	znf207b
slc43a1a	9.65884e-33	0.127928	0.129	0.019	1.61969e-28	4	slc43a1a
morf4l1	1.18402e-32	0.246832	0.271	0.073	1.98549e-28	4	morf4l1
atic	1.38886e-32	0.168242	0.099	0.011	2.32898e-28	4	atic
mt-atp6	1.71802e-32	0.553896	0.792	0.454	2.88095e-28	4	mt-atp6
tmem107.1	2.15869e-32	0.110361	0.135	0.021	3.61991e-28	4	tmem107.1
cd99l2	5.58892e-32	0.136285	0.191	0.041	9.37207e-28	4	cd99l2
uck2b	9.66867e-32	0.106063	0.073	0.006	1.62134e-27	4	uck2b
hdgfl2	1.29308e-31	0.164552	0.234	0.059	2.16837e-27	4	hdgfl2
BX511111.1	1.38156e-31	0.176279	0.271	0.076	2.31674e-27	4	BX511111.1
cdc6	1.59806e-31	0.11656	0.086	0.008	2.67979e-27	4	cdc6
nasp	1.80447e-31	0.29091	0.139	0.022	3.02591e-27	4	nasp
magoh	1.91935e-31	0.16813	0.135	0.022	3.21856e-27	4	magoh
hypk	2.14424e-31	0.215988	0.231	0.057	3.59568e-27	4	hypk
taf15	5.13546e-31	0.245553	0.158	0.029	8.61166e-27	4	taf15
manf	5.33921e-31	0.129915	0.073	0.006	8.95333e-27	4	manf
ewsr1a	5.55217e-31	0.153189	0.188	0.041	9.31043e-27	4	ewsr1a
selenot2	6.27318e-31	0.151147	0.205	0.047	1.05195e-26	4	selenot2
atp5f1b2	6.92552e-31	0.376942	0.406	0.147	1.16134e-26	4	atp5f1b
lsm7	1.14911e-30	0.223064	0.172	0.035	1.92694e-26	4	lsm7
mdc1	1.23384e-30	0.182285	0.238	0.063	2.06903e-26	4	mdc1
UTP14C	1.35592e-30	0.129481	0.132	0.021	2.27374e-26	4	UTP14C
lin37	1.64457e-30	0.10389	0.102	0.013	2.75779e-26	4	lin37
smc3	1.89036e-30	0.118619	0.106	0.014	3.16995e-26	4	smc3
myl12.1	2.31732e-30	0.342212	0.581	0.254	3.88592e-26	4	myl12.1
psmb7	4.29365e-30	0.179201	0.155	0.029	7.20002e-26	4	psmb7
dynll1	5.04625e-30	0.454816	0.323	0.105	8.46206e-26	4	dynll1
prdx4	5.71613e-30	0.233924	0.224	0.057	9.58539e-26	4	prdx4
zgc:194627	6.28702e-30	0.164478	0.092	0.011	1.05427e-25	4	zgc:194627
nhp2	7.87963e-30	0.183344	0.155	0.029	1.32134e-25	4	nhp2
si:ch211-266i6.3	8.59113e-30	0.176737	0.152	0.029	1.44065e-25	4	si:ch211-266i6.3
supt16h	1.17009e-29	0.155197	0.125	0.02	1.96213e-25	4	supt16h
abce1	1.73789e-29	0.122183	0.092	0.011	2.91426e-25	4	abce1
hat1	1.74944e-29	0.113289	0.089	0.01	2.93363e-25	4	hat1
pa2g4b	2.01022e-29	0.207668	0.205	0.049	3.37094e-25	4	pa2g4b
ddost	2.55617e-29	0.16821	0.132	0.022	4.28644e-25	4	ddost
cox6a1	4.19968e-29	0.286793	0.281	0.085	7.04244e-25	4	cox6a1
zgc:56304	4.96005e-29	0.194315	0.162	0.033	8.31751e-25	4	zgc:56304
ssb	5.71596e-29	0.152164	0.112	0.016	9.5851e-25	4	ssb
sub1b	5.90224e-29	0.176593	0.182	0.04	9.89747e-25	4	sub1b
MZT1	6.83996e-29	0.128294	0.165	0.034	1.14699e-24	4	MZT1
cyp19a1a1	7.24282e-29	0.656476	0.31	0.101	1.21455e-24	4	cyp19a1a
crk	9.92305e-29	0.142119	0.188	0.043	1.664e-24	4	crk
aurkb	1.36603e-28	0.148903	0.092	0.011	2.2907e-24	4	aurkb
psmd1	1.37524e-28	0.132115	0.109	0.016	2.30613e-24	4	psmd1
pfn2l	1.61498e-28	0.264334	0.37	0.132	2.70815e-24	4	pfn2l
orc6	2.01911e-28	0.120441	0.086	0.01	3.38585e-24	4	orc6
cfl12	2.08671e-28	0.45819	0.647	0.318	3.4992e-24	4	cfl1
top2a	3.30865e-28	0.281196	0.069	0.006	5.54827e-24	4	top2a
ywhabb	3.39331e-28	0.265992	0.396	0.149	5.69024e-24	4	ywhabb
ddx39ab	3.73494e-28	0.237574	0.145	0.027	6.26312e-24	4	ddx39ab
emd	9.05324e-28	0.208331	0.393	0.151	1.51814e-23	4	emd
tmpob	1.49204e-27	0.108017	0.142	0.027	2.50199e-23	4	tmpob
aspm	1.90547e-27	0.236645	0.102	0.015	3.19528e-23	4	aspm
psmb3	2.10163e-27	0.189099	0.149	0.029	3.52422e-23	4	psmb3
dclre1b	2.19645e-27	0.113764	0.142	0.027	3.68322e-23	4	dclre1b
gng5	3.0743e-27	0.240468	0.297	0.096	5.1553e-23	4	gng5
si:dkey-230p4.1	3.39392e-27	0.128606	0.145	0.028	5.69127e-23	4	si:dkey-230p4.1
reep51	3.82415e-27	0.258549	0.399	0.151	6.41271e-23	4	reep5
abcf1	4.05916e-27	0.157792	0.119	0.02	6.80681e-23	4	abcf1
twnk	4.45774e-27	0.103728	0.135	0.025	7.47519e-23	4	twnk
rnaseh2b	5.25198e-27	0.101411	0.066	0.006	8.80704e-23	4	rnaseh2b
clic41	6.2275e-27	0.240516	0.416	0.16	1.04429e-22	4	clic4
psma5	6.31427e-27	0.187694	0.191	0.046	1.05884e-22	4	psma5
hnrnpul1	7.11505e-27	0.139213	0.218	0.058	1.19312e-22	4	hnrnpul1
h3f3b.1.11	8.03822e-27	0.3003	0.545	0.247	1.34793e-22	4	h3f3b.1.1
srsf1a	1.21887e-26	0.144469	0.145	0.028	2.04393e-22	4	srsf1a
atp5pd1	1.36645e-26	0.255157	0.33	0.117	2.2914e-22	4	atp5pd
jam2b1	1.44639e-26	0.379175	0.7	0.37	2.42544e-22	4	jam2b
ssr3	1.73285e-26	0.26864	0.449	0.181	2.90581e-22	4	ssr3
si:ch211-51e12.7	1.82344e-26	0.179319	0.178	0.041	3.05772e-22	4	si:ch211-51e12.7
tcp1	7.48606e-26	0.239641	0.38	0.143	1.25534e-21	4	tcp1
pdia6	1.08315e-25	0.19738	0.135	0.026	1.81633e-21	4	pdia6
rbx1	1.39769e-25	0.193626	0.195	0.049	2.34379e-21	4	rbx1
ncapd2	1.62859e-25	0.127866	0.076	0.008	2.73099e-21	4	ncapd2
ncl	2.07984e-25	0.341872	0.416	0.173	3.48769e-21	4	ncl
marcksb	2.69538e-25	0.20694	0.116	0.02	4.51988e-21	4	marcksb
ube2nb	2.73799e-25	0.175175	0.168	0.039	4.59133e-21	4	ube2nb
mibp	3.20428e-25	0.236348	0.079	0.009	5.37325e-21	4	mibp
gnl3	3.55864e-25	0.109118	0.129	0.024	5.96748e-21	4	gnl3
aldh1a21	3.77541e-25	0.380104	0.706	0.367	6.33098e-21	4	aldh1a2
ndnf1	4.80408e-25	0.358944	0.772	0.423	8.05596e-21	4	ndnf
fstl31	5.83068e-25	0.312634	0.317	0.112	9.77747e-21	4	fstl3
phf20b	6.21212e-25	0.160103	0.264	0.085	1.04171e-20	4	phf20b
tspan2a	6.75145e-25	0.1069	0.132	0.026	1.13215e-20	4	tspan2a
mtpn	7.62495e-25	0.232289	0.221	0.064	1.27863e-20	4	mtpn
anos1b	9.27501e-25	0.163571	0.231	0.069	1.55533e-20	4	anos1b
ube2f	9.3036e-25	0.150056	0.221	0.064	1.56012e-20	4	ube2f
alyref	1.06959e-24	0.300477	0.185	0.046	1.7936e-20	4	alyref
hist1h4l.12	1.09864e-24	0.103307	0.076	0.009	1.8423e-20	4	hist1h4l.12
mlh1	1.14538e-24	0.100452	0.132	0.026	1.92068e-20	4	mlh1
rangap1a	1.16024e-24	0.123544	0.191	0.049	1.94561e-20	4	rangap1a
bcl7bb	1.55164e-24	0.15566	0.271	0.089	2.60194e-20	4	bcl7bb
ddx52	1.58384e-24	0.27834	0.297	0.101	2.65594e-20	4	ddx5
snrpc	1.74128e-24	0.143952	0.139	0.028	2.91995e-20	4	snrpc
calr	1.7527e-24	0.177922	0.211	0.06	2.93911e-20	4	calr
slc29a1a1	1.77734e-24	0.277081	0.67	0.321	2.98042e-20	4	slc29a1a
zgc:91910	1.83888e-24	0.183408	0.241	0.072	3.08362e-20	4	zgc:91910
ipo9	1.89102e-24	0.100934	0.135	0.027	3.17106e-20	4	ipo9
irf10	1.93989e-24	0.109406	0.132	0.026	3.253e-20	4	irf10
gnb1b	2.31377e-24	0.261359	0.492	0.219	3.87996e-20	4	gnb1b
si:ch73-308l14.2	2.91489e-24	0.163473	0.254	0.081	4.88797e-20	4	si:ch73-308l14.2
rbm4.2	3.75781e-24	0.138118	0.125	0.024	6.30147e-20	4	rbm4.2
rwdd1	4.05203e-24	0.201406	0.178	0.045	6.79485e-20	4	rwdd1
llph	4.06174e-24	0.108832	0.142	0.03	6.81113e-20	4	llph
hnrnpa0a	4.79683e-24	0.20852	0.264	0.086	8.0438e-20	4	hnrnpa0a
prpf19	4.8212e-24	0.110174	0.092	0.013	8.08467e-20	4	prpf19
nid1b1	6.59637e-24	0.353488	0.891	0.575	1.10615e-19	4	nid1b
BX649250.1	9.35351e-24	0.104759	0.129	0.025	1.56849e-19	4	BX649250.1
BX511111.2	1.34366e-23	0.123823	0.185	0.048	2.25319e-19	4	BX511111.2
ifi30	1.4284e-23	0.253552	0.333	0.121	2.39529e-19	4	ifi30
fam3a	1.69351e-23	0.144629	0.251	0.08	2.83984e-19	4	fam3a
ywhabl	1.80872e-23	0.224999	0.416	0.172	3.03304e-19	4	ywhabl
polr2f	2.08593e-23	0.191428	0.185	0.049	3.4979e-19	4	polr2f
ywhae2	2.44596e-23	0.127651	0.175	0.045	4.10163e-19	4	ywhae2
oaz1a1	2.48526e-23	0.249373	0.307	0.107	4.16754e-19	4	oaz1a
selenof	3.02385e-23	0.230686	0.281	0.097	5.07069e-19	4	selenof
ilf2	3.87878e-23	0.18479	0.149	0.033	6.50432e-19	4	ilf2
nop56	5.01678e-23	0.251245	0.333	0.128	8.41263e-19	4	nop56
emg1	6.30914e-23	0.105786	0.149	0.034	1.05798e-18	4	emg1
pabpn11	6.61188e-23	0.280235	0.498	0.226	1.10875e-18	4	pabpn1
camlg	8.04835e-23	0.11113	0.145	0.033	1.34963e-18	4	camlg
tmed2	1.84064e-22	0.195689	0.281	0.096	3.08657e-18	4	tmed2
nutf2l	1.88476e-22	0.189368	0.106	0.019	3.16055e-18	4	nutf2l
gars	2.16335e-22	0.133358	0.172	0.045	3.62773e-18	4	gars
cox7a2a1	2.42556e-22	0.168071	0.155	0.037	4.06743e-18	4	cox7a2a
neil1	3.00715e-22	0.127743	0.191	0.054	5.04269e-18	4	neil1
cnbpb	3.15241e-22	0.283418	0.541	0.266	5.28627e-18	4	cnbpb
asph	3.22077e-22	0.136117	0.178	0.048	5.40091e-18	4	asph
phf6	3.9821e-22	0.113227	0.175	0.046	6.67758e-18	4	phf6
phc2a1	4.05674e-22	0.289302	0.568	0.27	6.80275e-18	4	phc2a
bud31	4.44755e-22	0.142405	0.162	0.04	7.4581e-18	4	bud31
psma6l	4.59381e-22	0.140988	0.224	0.07	7.70336e-18	4	psma6l
usp10	6.15168e-22	0.147878	0.135	0.029	1.03158e-17	4	usp10
skp1	6.15171e-22	0.19316	0.383	0.153	1.03158e-17	4	skp1
sap18	6.28552e-22	0.166488	0.158	0.039	1.05402e-17	4	sap18
myh10	6.28835e-22	0.110867	0.129	0.027	1.05449e-17	4	myh10
actb12	9.28855e-22	0.486955	0.805	0.604	1.5576e-17	4	actb1
snrpe	9.58533e-22	0.229035	0.116	0.023	1.60736e-17	4	snrpe
kmt2bb	9.88752e-22	0.152344	0.271	0.094	1.65804e-17	4	kmt2bb
thap12a	1.09166e-21	0.105786	0.145	0.034	1.8306e-17	4	thap12a
ywhaqa	1.3587e-21	0.224153	0.274	0.097	2.27841e-17	4	ywhaqa
tomm6	2.04682e-21	0.107929	0.096	0.016	3.43232e-17	4	tomm6
ddx24	2.13353e-21	0.10112	0.112	0.022	3.57772e-17	4	ddx24
fabp11a1	2.47387e-21	0.43654	0.736	0.45	4.14843e-17	4	fabp11a
atp5f1d	2.80177e-21	0.171724	0.31	0.115	4.69828e-17	4	atp5f1d
kctd5a	2.80835e-21	0.170915	0.29	0.106	4.70932e-17	4	kctd5a
kpnb3	3.17672e-21	0.135786	0.139	0.031	5.32704e-17	4	kpnb3
snrpd3l	3.49306e-21	0.137397	0.129	0.028	5.85751e-17	4	snrpd3l
polr3glb	3.73651e-21	0.14985	0.248	0.085	6.26575e-17	4	polr3glb
zw10	4.6387e-21	0.105136	0.139	0.032	7.77864e-17	4	zw10
rhoaa	4.8795e-21	0.193541	0.373	0.151	8.18244e-17	4	rhoaa
eci2	5.40385e-21	0.134538	0.208	0.064	9.06172e-17	4	eci2
mydgf	6.07173e-21	0.121195	0.191	0.056	1.01817e-16	4	mydgf
ss18	6.60291e-21	0.122231	0.106	0.02	1.10724e-16	4	ss18
sem1	7.2477e-21	0.181295	0.317	0.12	1.21537e-16	4	sem1
anp32a	1.00273e-20	0.243578	0.287	0.107	1.68149e-16	4	anp32a
arl6ip1	1.05242e-20	0.219353	0.234	0.076	1.76481e-16	4	arl6ip1
npm1b	1.14326e-20	0.107609	0.168	0.045	1.91713e-16	4	npm1b
prelid3b1	1.25943e-20	0.233284	0.389	0.164	2.11194e-16	4	prelid3b
ccnd2a1	1.32357e-20	0.279136	0.465	0.22	2.21949e-16	4	ccnd2a
degs11	1.40141e-20	0.13782	0.248	0.084	2.35002e-16	4	degs1
lrpap1	1.7288e-20	0.138677	0.215	0.068	2.89902e-16	4	lrpap1
fundc2	1.88855e-20	0.154112	0.221	0.072	3.1669e-16	4	fundc2
si:ch211-198a12.6	1.93565e-20	0.159509	0.142	0.034	3.2459e-16	4	si:ch211-198a12.6
emc1	1.97557e-20	0.102119	0.158	0.041	3.31283e-16	4	emc1
uqcrh	2.13218e-20	0.217847	0.274	0.101	3.57545e-16	4	uqcrh
hhip	2.27572e-20	0.179744	0.205	0.063	3.81616e-16	4	hhip
notum1b1	2.53499e-20	0.346713	0.472	0.235	4.25093e-16	4	notum1b
atp5fa12	2.60548e-20	0.273697	0.284	0.107	4.36914e-16	4	atp5fa1
psme2	2.6594e-20	0.214765	0.162	0.043	4.45955e-16	4	psme2
rbm4.3	2.97086e-20	0.227187	0.188	0.054	4.98183e-16	4	rbm4.3
tmed10	3.31948e-20	0.177789	0.228	0.074	5.56643e-16	4	tmed10
ctsh	3.32991e-20	0.136218	0.224	0.074	5.58392e-16	4	ctsh
si:ch211-136a13.1	3.45143e-20	0.112279	0.149	0.037	5.7877e-16	4	si:ch211-136a13.1
tuba1a	3.61755e-20	0.133015	0.092	0.016	6.06627e-16	4	tuba1a
dcp2	4.67249e-20	0.147617	0.228	0.077	7.8353e-16	4	dcp2
NUMA1	4.80571e-20	0.128431	0.089	0.015	8.05869e-16	4	NUMA1
psmb2	6.71659e-20	0.187904	0.261	0.093	1.12631e-15	4	psmb2
cmtr1	6.84723e-20	0.102851	0.152	0.039	1.14821e-15	4	cmtr1
prkcsh	7.57671e-20	0.101734	0.076	0.011	1.27054e-15	4	prkcsh
polr2l	1.02884e-19	0.160269	0.172	0.048	1.72527e-15	4	polr2l
canx	1.11155e-19	0.165736	0.142	0.036	1.86396e-15	4	canx
pin1	1.12296e-19	0.191299	0.221	0.074	1.88308e-15	4	pin1
tmem258	1.3275e-19	0.211315	0.376	0.161	2.22609e-15	4	tmem258
pwp1	1.7221e-19	0.108816	0.145	0.037	2.88779e-15	4	pwp1
atp5pf1	2.47778e-19	0.180012	0.32	0.127	4.15499e-15	4	atp5pf
hspa81	2.66224e-19	0.401868	0.604	0.33	4.46432e-15	4	hspa8
cyyr1	3.16074e-19	0.136538	0.215	0.071	5.30024e-15	4	cyyr1
zmp:0000000735	3.1793e-19	0.112426	0.162	0.045	5.33137e-15	4	zmp:0000000735
ntmt1	3.33586e-19	0.125325	0.215	0.071	5.5939e-15	4	ntmt1
khsrp	3.97297e-19	0.149936	0.125	0.029	6.66227e-15	4	khsrp
atp5f1c2	4.13113e-19	0.179313	0.264	0.097	6.9275e-15	4	atp5f1c
spcs1	5.29674e-19	0.158625	0.211	0.069	8.8821e-15	4	spcs1
smarce1	5.53434e-19	0.174192	0.149	0.039	9.28054e-15	4	smarce1
rbm28	6.83741e-19	0.141267	0.221	0.074	1.14657e-14	4	rbm28
ywhaba	7.91307e-19	0.194332	0.366	0.158	1.32694e-14	4	ywhaba
pfn21	9.61384e-19	0.292058	0.406	0.184	1.61215e-14	4	pfn2
dnmt3bb.1	1.00054e-18	0.105322	0.132	0.033	1.67781e-14	4	dnmt3bb.1
lman2	1.44185e-18	0.141365	0.149	0.039	2.41784e-14	4	lman2
mad2l1	1.52794e-18	0.139797	0.053	0.006	2.56221e-14	4	mad2l1
apcdd1l	1.7615e-18	0.179401	0.241	0.089	2.95386e-14	4	apcdd1l
csnk2b	1.778e-18	0.174814	0.257	0.096	2.98152e-14	4	csnk2b
ddx39aa	2.14317e-18	0.170759	0.178	0.054	3.59388e-14	4	ddx39aa
pef1	2.27744e-18	0.134115	0.231	0.082	3.81904e-14	4	pef1
glrx5	2.50117e-18	0.133298	0.149	0.039	4.19422e-14	4	glrx5
slc39a7	2.57798e-18	0.116874	0.175	0.053	4.32301e-14	4	slc39a7
kpnb1	2.60028e-18	0.137428	0.145	0.038	4.36042e-14	4	kpnb1
cct4	3.02526e-18	0.186613	0.353	0.153	5.07306e-14	4	cct4
ndc1	3.87168e-18	0.112572	0.099	0.02	6.49243e-14	4	ndc1
psmb10	4.07393e-18	0.138312	0.172	0.052	6.83158e-14	4	psmb10
arf6a	4.20598e-18	0.13004	0.083	0.014	7.053e-14	4	arf6a
fndc3ba	4.28061e-18	0.138678	0.221	0.077	7.17815e-14	4	fndc3ba
mt-nd2	4.37511e-18	0.30268	0.508	0.254	7.33662e-14	4	mt-nd2
eif1axb	5.54015e-18	0.174032	0.195	0.063	9.29028e-14	4	eif1axb
pip4k2ca	5.76593e-18	0.11893	0.241	0.086	9.66889e-14	4	pip4k2ca
cycsb1	6.84533e-18	0.183297	0.139	0.037	1.14789e-13	4	cycsb
ptbp1a	7.20782e-18	0.149939	0.205	0.069	1.20868e-13	4	ptbp1a
poglut1	7.21601e-18	0.104781	0.155	0.044	1.21005e-13	4	poglut1
copz1	8.94133e-18	0.152456	0.139	0.037	1.49937e-13	4	copz1
psip1b	1.10877e-17	0.13409	0.191	0.062	1.8593e-13	4	psip1b
sec11a	1.44446e-17	0.158624	0.142	0.038	2.42221e-13	4	sec11a
si:ch211-66k16.27	1.44534e-17	0.169386	0.327	0.143	2.42369e-13	4	si:ch211-66k16.27
hnrnpl2	1.47589e-17	0.113634	0.116	0.027	2.47492e-13	4	hnrnpl2
clta	2.19871e-17	0.144784	0.132	0.034	3.68702e-13	4	clta
si:dkey-67c22.2	2.46901e-17	0.140922	0.205	0.069	4.14028e-13	4	si:dkey-67c22.2
psmd7	2.63961e-17	0.101888	0.099	0.021	4.42637e-13	4	psmd7
psma3	2.91068e-17	0.202218	0.168	0.052	4.88092e-13	4	psma3
bptf	3.35694e-17	0.106423	0.172	0.053	5.62925e-13	4	bptf
mpc11	3.50269e-17	0.11363	0.195	0.065	5.87365e-13	4	mpc1
arhgdia	3.93406e-17	0.182762	0.241	0.091	6.59702e-13	4	arhgdia
hnrpkl	4.06056e-17	0.121063	0.165	0.05	6.80915e-13	4	hnrpkl
vamp3	4.64287e-17	0.163659	0.373	0.165	7.78563e-13	4	vamp3
vwde1	4.6723e-17	0.212422	0.396	0.194	7.83498e-13	4	vwde
cd1511	5.87025e-17	0.220139	0.574	0.299	9.84382e-13	4	cd151
fkbp2	6.1094e-17	0.138497	0.155	0.045	1.02448e-12	4	fkbp2
srsf6b	6.25342e-17	0.128095	0.165	0.049	1.04864e-12	4	srsf6b
nop16	7.3862e-17	0.112386	0.083	0.015	1.23859e-12	4	nop16
hsp90b1	8.29791e-17	0.25716	0.125	0.032	1.39148e-12	4	hsp90b1
hexb	1.00713e-16	0.115014	0.158	0.047	1.68886e-12	4	hexb
tp53inp2	1.01086e-16	0.175774	0.073	0.012	1.69511e-12	4	tp53inp2
oaz1b	1.0874e-16	0.203868	0.248	0.094	1.82346e-12	4	oaz1b
tubb4b	1.16964e-16	0.433615	0.611	0.346	1.96137e-12	4	tubb4b
zgc:110425	1.19831e-16	0.164007	0.089	0.018	2.00945e-12	4	zgc:110425
ccna2	1.23023e-16	0.158907	0.066	0.01	2.06297e-12	4	ccna2
calua	1.49256e-16	0.130378	0.218	0.08	2.50287e-12	4	calua
CABZ01086029.1	1.50357e-16	0.123489	0.182	0.06	2.52133e-12	4	CABZ01086029.1
slc16a10	1.54308e-16	0.127803	0.168	0.053	2.58759e-12	4	slc16a10
bccip1	1.60934e-16	0.172161	0.218	0.08	2.6987e-12	4	bccip
ppiab2	1.62774e-16	0.312071	0.739	0.436	2.72955e-12	4	ppiab
khdrbs1b	1.64158e-16	0.159895	0.198	0.068	2.75276e-12	4	khdrbs1b
slc43a2b1	1.73768e-16	0.178667	0.281	0.117	2.91392e-12	4	slc43a2b
iqgap1	1.81125e-16	0.132715	0.201	0.07	3.03729e-12	4	iqgap1
ebna1bp2	1.99293e-16	0.120818	0.112	0.027	3.34194e-12	4	ebna1bp2
cct31	2.10196e-16	0.175866	0.32	0.138	3.52478e-12	4	cct3
rbmx	2.79174e-16	0.129044	0.152	0.045	4.68147e-12	4	rbmx
gnb1a1	2.84328e-16	0.165058	0.376	0.172	4.7679e-12	4	gnb1a
timp2b	2.88238e-16	0.100915	0.135	0.037	4.83346e-12	4	timp2b
si:ch73-1a9.3	2.99089e-16	0.629557	0.7	0.46	5.01542e-12	4	si:ch73-1a9.3
calr3a	3.02792e-16	0.14832	0.129	0.034	5.07751e-12	4	calr3a
dolpp1	3.37289e-16	0.115114	0.155	0.047	5.656e-12	4	dolpp1
entpd11	3.88461e-16	0.217902	0.571	0.312	6.5141e-12	4	entpd1
cox5ab1	4.33936e-16	0.133519	0.155	0.047	7.27667e-12	4	cox5ab
eif4h	4.96918e-16	0.111024	0.102	0.023	8.33282e-12	4	eif4h
rrp1	5.02999e-16	0.105152	0.145	0.042	8.4348e-12	4	rrp1
gmfb	5.46699e-16	0.148346	0.162	0.05	9.16759e-12	4	gmfb
atp5l2	5.92543e-16	0.230454	0.343	0.156	9.93636e-12	4	atp5l
mif	6.83647e-16	0.127188	0.172	0.055	1.14641e-11	4	mif
krtcap2	7.24354e-16	0.162278	0.215	0.078	1.21467e-11	4	krtcap2
psmb6	7.4646e-16	0.156768	0.198	0.069	1.25174e-11	4	psmb6
rasgef1ba1	9.80508e-16	0.141462	0.34	0.153	1.64421e-11	4	rasgef1ba
prps1a	1.26897e-15	0.104951	0.092	0.02	2.12793e-11	4	prps1a
sox61	1.34398e-15	0.176387	0.396	0.191	2.25371e-11	4	sox6
ccdc25	1.35041e-15	0.118873	0.205	0.074	2.2645e-11	4	ccdc25
psma2	3.07178e-15	0.143307	0.198	0.071	5.15108e-11	4	psma2
vcp	3.21679e-15	0.110343	0.109	0.027	5.39424e-11	4	vcp
uqcrfs11	3.67277e-15	0.131648	0.168	0.055	6.15887e-11	4	uqcrfs1
si:ch211-286b5.51	3.89722e-15	0.154053	0.244	0.097	6.53524e-11	4	si:ch211-286b5.5
fam120c	4.24319e-15	0.143891	0.224	0.086	7.1154e-11	4	fam120c
aldh2.2	4.48266e-15	0.158382	0.257	0.105	7.51697e-11	4	aldh2.2
tp53	4.56048e-15	0.125571	0.119	0.032	7.64747e-11	4	tp53
myo18ab	4.66297e-15	0.111188	0.198	0.072	7.81934e-11	4	myo18ab
lsm4	5.63864e-15	0.117404	0.149	0.045	9.45543e-11	4	lsm4
slc9a3r1a1	5.87193e-15	0.105172	0.178	0.061	9.84665e-11	4	slc9a3r1a
uqcrc1	6.06433e-15	0.101912	0.102	0.025	1.01693e-10	4	uqcrc1
zgc:1527911	6.08463e-15	0.312162	0.558	0.32	1.02033e-10	4	zgc:152791
fkbp1b	7.38023e-15	0.135857	0.277	0.12	1.23759e-10	4	fkbp1b
pdgfd	7.53171e-15	0.15717	0.221	0.088	1.26299e-10	4	pdgfd
slc20a1b1	7.5953e-15	0.129894	0.099	0.024	1.27366e-10	4	slc20a1b
cct2.11	8.14087e-15	0.171884	0.422	0.208	1.36514e-10	4	cct2.1
pomp	8.42474e-15	0.182859	0.211	0.081	1.41274e-10	4	pomp
spcs2	8.57992e-15	0.126949	0.182	0.064	1.43877e-10	4	spcs2
phyhd1	8.72232e-15	0.111262	0.195	0.071	1.46265e-10	4	phyhd1
pho1	1.09123e-14	0.193723	0.254	0.105	1.82988e-10	4	pho
arpc3	1.30683e-14	0.194675	0.241	0.1	2.19142e-10	4	arpc3
ifi461	1.46877e-14	0.258329	0.558	0.314	2.46297e-10	4	ifi46
erlin1	1.48114e-14	0.121103	0.221	0.087	2.48373e-10	4	erlin1
hnrnpub	1.51715e-14	0.123946	0.122	0.034	2.54411e-10	4	hnrnpub
eif3jb	1.58406e-14	0.109436	0.175	0.061	2.65631e-10	4	eif3jb
ndufs7	1.83344e-14	0.105611	0.129	0.037	3.0745e-10	4	ndufs7
gpx4b	1.9512e-14	0.165777	0.172	0.06	3.27196e-10	4	gpx4b
u2af2b	1.96071e-14	0.115699	0.152	0.048	3.28791e-10	4	u2af2b
lsm3	2.36052e-14	0.102344	0.112	0.029	3.95836e-10	4	lsm3
atp5if1a1	2.5515e-14	0.172671	0.172	0.059	4.27862e-10	4	atp5if1a
cdc14b	2.67642e-14	0.135497	0.076	0.015	4.48809e-10	4	cdc14b
calm1b1	3.04885e-14	0.228077	0.152	0.05	5.11261e-10	4	calm1b
col12a1a	3.1849e-14	0.12984	0.264	0.113	5.34076e-10	4	col12a1a
slbp	3.97673e-14	0.117121	0.063	0.011	6.66857e-10	4	slbp
c1qbp	6.28187e-14	0.153625	0.175	0.063	1.05341e-09	4	c1qbp
stag2b	7.28632e-14	0.119984	0.224	0.091	1.22184e-09	4	stag2b
palm1b	7.30329e-14	0.158942	0.241	0.1	1.22469e-09	4	palm1b
crebzf	7.34588e-14	0.116297	0.182	0.065	1.23183e-09	4	crebzf
fubp1	7.88728e-14	0.107389	0.145	0.046	1.32262e-09	4	fubp1
rac1a	8.5239e-14	0.141212	0.191	0.071	1.42937e-09	4	rac1a
itgb5	8.9017e-14	0.12185	0.205	0.078	1.49273e-09	4	itgb5
atp5mc11	9.04435e-14	0.177041	0.119	0.034	1.51665e-09	4	atp5mc1
eif5	9.04797e-14	0.18602	0.211	0.083	1.51725e-09	4	eif5
nono	1.06446e-13	0.10661	0.109	0.029	1.78499e-09	4	nono
serpinh1b1	1.15181e-13	0.303822	0.267	0.117	1.93148e-09	4	serpinh1b
col12a1b1	1.18472e-13	0.170393	0.294	0.138	1.98666e-09	4	col12a1b
txndc12	1.20931e-13	0.10085	0.175	0.063	2.0279e-09	4	txndc12
g3bp1	1.25337e-13	0.125462	0.089	0.021	2.10177e-09	4	g3bp1
CT573344.1	1.39696e-13	0.115718	0.221	0.09	2.34257e-09	4	CT573344.1
dad1	1.56981e-13	0.193628	0.182	0.067	2.63242e-09	4	dad1
si:rp71-36a1.5.1	1.94194e-13	0.10401	0.185	0.07	3.25645e-09	4	si:rp71-36a1.5.1
si:dkeyp-113d7.1	2.21407e-13	0.107789	0.218	0.088	3.71278e-09	4	si:dkeyp-113d7.1
si:ch211-214j24.10	2.53071e-13	0.147094	0.201	0.079	4.24375e-09	4	si:ch211-214j24.10
prdx6	3.40431e-13	0.12877	0.155	0.053	5.7087e-09	4	prdx6
hm13	3.56853e-13	0.100701	0.086	0.02	5.98407e-09	4	hm13
nolc1	3.57891e-13	0.110287	0.092	0.023	6.00148e-09	4	nolc1
STMP1	3.92437e-13	0.112605	0.162	0.056	6.58078e-09	4	STMP1
asah1b	4.39999e-13	0.144546	0.277	0.128	7.37834e-09	4	asah1b
mt-cyb1	4.5504e-13	0.319499	0.888	0.738	7.63057e-09	4	mt-cyb
ifi45	4.6917e-13	0.365169	0.231	0.099	7.86752e-09	4	ifi45
bcas2	6.17478e-13	0.113672	0.142	0.047	1.03545e-08	4	bcas2
ube2d2	6.73222e-13	0.117107	0.158	0.055	1.12893e-08	4	ube2d2
sept7a1	6.97236e-13	0.121985	0.188	0.071	1.16919e-08	4	sept7a
ddx61	7.26654e-13	0.138853	0.172	0.063	1.21853e-08	4	ddx61
hp1bp3	7.29101e-13	0.140521	0.208	0.083	1.22263e-08	4	hp1bp3
mibp21	7.29643e-13	0.169418	0.696	0.394	1.22354e-08	4	mibp2
si:dkey-19e4.5	8.34836e-13	0.115044	0.191	0.076	1.39994e-08	4	si:dkey-19e4.5
wls1	9.85507e-13	0.139088	0.508	0.268	1.6526e-08	4	wls
il15ra1	9.9458e-13	0.159906	0.29	0.142	1.66781e-08	4	il15ra
gnai1	1.04435e-12	0.109673	0.182	0.07	1.75126e-08	4	gnai1
mt-nd4	1.2066e-12	0.250959	0.62	0.363	2.02335e-08	4	mt-nd4
fkbp1aa	1.48333e-12	0.192738	0.37	0.188	2.4874e-08	4	fkbp1aa
ccnb3	1.49444e-12	0.103512	0.066	0.013	2.50603e-08	4	ccnb3
tpm3	1.73754e-12	0.16834	0.426	0.228	2.91368e-08	4	tpm3
psma1	2.16276e-12	0.129632	0.307	0.145	3.62674e-08	4	psma1
si:dkey-159f12.2	2.74228e-12	0.114616	0.201	0.082	4.59853e-08	4	si:dkey-159f12.2
hbegfa1	2.87268e-12	0.122355	0.373	0.184	4.81719e-08	4	hbegfa
ube2na	3.02604e-12	0.104781	0.096	0.026	5.07436e-08	4	ube2na
itm2bb1	3.16147e-12	0.198497	0.578	0.317	5.30148e-08	4	itm2bb
luzp1	3.21153e-12	0.100263	0.191	0.076	5.38542e-08	4	luzp1
eif5a2	3.23121e-12	0.196475	0.178	0.069	5.41842e-08	4	eif5a2
akap12b1	3.54074e-12	0.182409	0.7	0.429	5.93747e-08	4	akap12b
hs3st3b1b	3.72489e-12	0.117471	0.122	0.038	6.24626e-08	4	hs3st3b1b
ddx42	3.88856e-12	0.105064	0.139	0.047	6.52073e-08	4	ddx42
psma8	5.31681e-12	0.162398	0.238	0.106	8.91576e-08	4	psma8
ewsr1b	5.89562e-12	0.106336	0.099	0.028	9.88636e-08	4	ewsr1b
eif6	6.23786e-12	0.106517	0.106	0.031	1.04603e-07	4	eif6
robo1	6.61223e-12	0.10456	0.241	0.106	1.1088e-07	4	robo1
ost4	6.89144e-12	0.113824	0.119	0.037	1.15562e-07	4	ost4
kdelr2b	7.11708e-12	0.113441	0.155	0.056	1.19346e-07	4	kdelr2b
gapdhs1	7.37194e-12	0.168795	0.459	0.255	1.2362e-07	4	gapdhs
tgif1	8.8423e-12	0.126699	0.198	0.08	1.48276e-07	4	tgif1
txn	1.31483e-11	0.26563	0.132	0.045	2.20484e-07	4	txn
kars	1.5879e-11	0.12085	0.132	0.045	2.66275e-07	4	kars
zgc:77086	1.59365e-11	0.101414	0.145	0.052	2.67239e-07	4	zgc:77086
srprb	1.80122e-11	0.111188	0.139	0.048	3.02047e-07	4	srprb
dido1	1.86177e-11	0.128812	0.211	0.089	3.122e-07	4	dido1
tmed7	1.99128e-11	0.110897	0.195	0.079	3.33919e-07	4	tmed7
acsbg2	2.07447e-11	0.111741	0.215	0.095	3.47867e-07	4	acsbg2
srsf5a1	2.19582e-11	0.134588	0.571	0.32	3.68217e-07	4	srsf5a
plxna4	2.4219e-11	0.151743	0.244	0.115	4.06129e-07	4	plxna4
crtap	2.46473e-11	0.108138	0.267	0.128	4.13311e-07	4	crtap
ccl19a.11	2.6425e-11	0.923458	0.069	0.016	4.43122e-07	4	ccl19a.1
atp5mf1	3.45598e-11	0.155121	0.172	0.068	5.79534e-07	4	atp5mf
adma1	3.55247e-11	0.26736	0.455	0.264	5.95714e-07	4	adma
cbx1b	3.81893e-11	0.110584	0.224	0.102	6.40397e-07	4	cbx1b
ponzr1	3.8822e-11	0.237464	0.254	0.12	6.51007e-07	4	ponzr1
puf60a	4.00129e-11	0.105973	0.109	0.034	6.70976e-07	4	puf60a
eif3ea1	4.10569e-11	0.164247	0.601	0.358	6.88484e-07	4	eif3ea
cd151l	4.43765e-11	0.141029	0.106	0.033	7.44149e-07	4	cd151l
zgc:114181	5.07481e-11	0.123182	0.251	0.119	8.50995e-07	4	zgc:114181
nr2f1a1	5.22699e-11	0.177378	0.475	0.27	8.76514e-07	4	nr2f1a
ube2v2	5.27277e-11	0.15301	0.314	0.16	8.8419e-07	4	ube2v2
tktb	6.65423e-11	0.105795	0.125	0.043	1.11585e-06	4	tktb
cnn21	6.74722e-11	0.152452	0.403	0.215	1.13144e-06	4	cnn2
cxcl141	6.81188e-11	0.220943	0.571	0.351	1.14228e-06	4	cxcl14
rab2a1	7.21604e-11	0.118053	0.231	0.104	1.21006e-06	4	rab2a
tapbp.1	8.65306e-11	0.126849	0.198	0.085	1.45103e-06	4	tapbp.1
vat11	9.01967e-11	0.154549	0.66	0.408	1.51251e-06	4	vat1
podxl1	1.06084e-10	0.182969	0.842	0.575	1.77892e-06	4	podxl
ndufb9	1.13184e-10	0.111124	0.168	0.067	1.89798e-06	4	ndufb9
rab101	1.19637e-10	0.113812	0.261	0.126	2.0062e-06	4	rab10
ipo7	1.23104e-10	0.120035	0.142	0.053	2.06433e-06	4	ipo7
idh22	1.2357e-10	0.13695	0.244	0.116	2.07215e-06	4	idh2
hmgn6	1.35433e-10	0.19291	0.634	0.419	2.27108e-06	4	hmgn6
apof1	1.3725e-10	0.159916	0.271	0.136	2.30155e-06	4	apof
dnaja2a	1.49792e-10	0.11414	0.248	0.116	2.51187e-06	4	dnaja2a
cmc1	1.53717e-10	0.102426	0.178	0.075	2.57769e-06	4	cmc1
cnp	1.58729e-10	0.16937	0.168	0.068	2.66173e-06	4	cnp
ndufc2	1.59809e-10	0.107744	0.135	0.049	2.67984e-06	4	ndufc2
si:ch211-183d5.21	1.61515e-10	0.136183	0.198	0.087	2.70845e-06	4	si:ch211-183d5.2
si:ch211-217k17.7	1.68741e-10	0.147535	0.195	0.086	2.82961e-06	4	si:ch211-217k17.7
dkk3b1	1.7418e-10	0.175354	0.551	0.333	2.92083e-06	4	dkk3b
paip2b	1.7916e-10	0.119286	0.244	0.114	3.00434e-06	4	paip2b
aplp2	1.81544e-10	0.106547	0.218	0.097	3.04431e-06	4	aplp2
atp5meb	1.85276e-10	0.112192	0.386	0.206	3.10689e-06	4	atp5meb
si:dkey-188i13.61	2.09303e-10	0.144703	0.294	0.148	3.50979e-06	4	si:dkey-188i13.6
eif3c1	2.38181e-10	0.110886	0.257	0.124	3.99406e-06	4	eif3c
nrxn1a1	2.42359e-10	0.122944	0.34	0.183	4.06413e-06	4	nrxn1a
zgc:162944	2.44423e-10	0.141307	0.211	0.096	4.09873e-06	4	zgc:162944
tbcb	2.92265e-10	0.103071	0.165	0.068	4.90099e-06	4	tbcb
ripply1	3.06191e-10	0.120834	0.129	0.047	5.13452e-06	4	ripply1
si:dkey-40g16.6	3.16104e-10	0.166169	0.096	0.029	5.30074e-06	4	si:dkey-40g16.6
spcs3	3.21869e-10	0.114349	0.175	0.072	5.39742e-06	4	spcs3
nkd1	3.54598e-10	0.11414	0.267	0.135	5.94626e-06	4	nkd1
hmgb3a	3.62429e-10	0.131675	0.343	0.19	6.07757e-06	4	hmgb3a
ube2c	4.34093e-10	0.150862	0.063	0.015	7.27931e-06	4	ube2c
anp32e	4.44366e-10	0.105883	0.106	0.034	7.45157e-06	4	anp32e
mt-nd3	5.51268e-10	0.124415	0.201	0.09	9.24421e-06	4	mt-nd3
agrn	5.86776e-10	0.122206	0.238	0.113	9.83965e-06	4	agrn
tnfaip61	6.11384e-10	0.122362	0.314	0.171	1.02523e-05	4	tnfaip6
ssr4	6.24537e-10	0.1875	0.33	0.181	1.04729e-05	4	ssr4
gpc41	6.91894e-10	0.11091	0.442	0.258	1.16024e-05	4	gpc4
cct71	7.31797e-10	0.119639	0.274	0.136	1.22715e-05	4	cct7
chtopa	7.68695e-10	0.114203	0.158	0.064	1.28902e-05	4	chtopa
isg151	8.71038e-10	0.320865	0.254	0.128	1.46064e-05	4	isg15
tspan18b1	8.86604e-10	0.109228	0.505	0.284	1.48675e-05	4	tspan18b
anxa11b1	9.78226e-10	0.120724	0.274	0.137	1.64039e-05	4	anxa11b
axin21	1.01987e-09	0.11645	0.393	0.222	1.71022e-05	4	axin2
fbln52	1.54624e-09	0.142631	0.393	0.216	2.59288e-05	4	fbln5
fabp31	1.63276e-09	0.161714	0.528	0.329	2.73798e-05	4	fabp3
ndufa6	1.98368e-09	0.122496	0.152	0.063	3.32643e-05	4	ndufa6
prdx21	2.07984e-09	0.160758	0.624	0.388	3.48768e-05	4	prdx2
psme1	2.40233e-09	0.120309	0.139	0.055	4.02847e-05	4	psme1
tbca	2.86032e-09	0.104609	0.165	0.07	4.79647e-05	4	tbca
lhfpl2a	2.90773e-09	0.10224	0.215	0.104	4.87598e-05	4	lhfpl2a
sri	2.92779e-09	0.117947	0.165	0.07	4.90962e-05	4	sri
top1l	3.19058e-09	0.110038	0.139	0.055	5.35028e-05	4	top1l
ndufa8	3.90419e-09	0.100591	0.198	0.091	6.54694e-05	4	ndufa8
cox8a1	4.53229e-09	0.145401	0.244	0.125	7.60019e-05	4	cox8a
rnf213a1	4.63894e-09	0.180913	0.297	0.161	7.77903e-05	4	rnf213a
pdia3	5.21379e-09	0.138159	0.482	0.284	8.743e-05	4	pdia3
tmem981	5.76769e-09	0.113832	0.446	0.276	9.67184e-05	4	tmem98
atp5pb1	5.93747e-09	0.126958	0.29	0.153	9.95655e-05	4	atp5pb
tomm20a	6.10613e-09	0.129836	0.086	0.027	0.000102394	4	tomm20a
tpi1b1	7.63928e-09	0.103761	0.116	0.043	0.000128103	4	tpi1b
fkbp9	7.64536e-09	0.107258	0.218	0.109	0.000128205	4	fkbp9
COX5B2	7.74965e-09	0.163075	0.248	0.128	0.000129954	4	COX5B
srrm1	7.88999e-09	0.117462	0.215	0.104	0.000132307	4	srrm1
plpp1a1	9.28807e-09	0.170633	0.865	0.706	0.000155752	4	plpp1a
pcf11	9.59941e-09	0.11416	0.142	0.058	0.000160973	4	pcf11
prkab1b	9.67838e-09	0.110754	0.185	0.085	0.000162297	4	prkab1b
atp5md1	1.01028e-08	0.103008	0.132	0.053	0.000169413	4	atp5md
tjp2b1	1.25417e-08	0.120422	0.396	0.227	0.000210312	4	tjp2b
gtpbp41	1.3018e-08	0.113264	0.439	0.254	0.0002183	4	gtpbp4
eif5a1	1.38346e-08	0.16364	0.525	0.325	0.000231992	4	eif5a
cdh21	1.50889e-08	0.119353	0.518	0.317	0.000253025	4	cdh2
ctnnb1	1.53021e-08	0.115567	0.198	0.094	0.000256601	4	ctnnb1
add3a1	1.63817e-08	0.100453	0.333	0.185	0.000274705	4	add3a
eif3d	1.65528e-08	0.110603	0.535	0.327	0.000277574	4	eif3d
h3f3b.1.21	1.80742e-08	0.122494	0.158	0.07	0.000303087	4	h3f3b.1.2
ndufb10	1.89948e-08	0.125301	0.162	0.072	0.000318523	4	ndufb10
sod11	1.95505e-08	0.159149	0.188	0.089	0.000327842	4	sod1
cst14a.21	2.40549e-08	0.106567	0.168	0.076	0.000403377	4	cst14a.2
CABZ01073795.1	2.65146e-08	0.107347	0.073	0.022	0.000444623	4	CABZ01073795.1
phc2b1	2.69715e-08	0.14272	0.149	0.065	0.000452285	4	phc2b
mt-nd5	2.99394e-08	0.117536	0.248	0.129	0.000502054	4	mt-nd5
GCA	3.11017e-08	0.110229	0.182	0.085	0.000521544	4	GCA
cct51	3.51709e-08	0.107393	0.3	0.164	0.000589781	4	cct5
egr2b1	3.57068e-08	0.131793	0.063	0.017	0.000598767	4	egr2b
hsbp1b	4.7557e-08	0.107408	0.172	0.08	0.000797484	4	hsbp1b
cox7b2	4.90339e-08	0.129747	0.205	0.101	0.000822249	4	cox7b
eif4bb	5.16228e-08	0.105354	0.125	0.052	0.000865663	4	eif4bb
serbp1a	5.77321e-08	0.191621	0.858	0.665	0.000968109	4	serbp1a
pi4kb	5.85043e-08	0.101252	0.244	0.133	0.000981058	4	pi4kb
svild1	6.37893e-08	0.116969	0.284	0.154	0.00106968	4	svild
cpne1	6.45293e-08	0.101857	0.208	0.104	0.00108209	4	cpne1
lasp1	6.61206e-08	0.122323	0.248	0.131	0.00110878	4	lasp1
psma4	6.62832e-08	0.10149	0.145	0.064	0.0011115	4	psma4
colec122	7.38732e-08	0.106634	0.393	0.246	0.00123878	4	colec12
abl21	8.20557e-08	0.111038	0.284	0.163	0.00137599	4	abl2
ngdn1	8.76886e-08	0.108633	0.307	0.172	0.00147045	4	ngdn
eef2b1	8.99435e-08	0.180024	0.884	0.774	0.00150826	4	eef2b
psmb4	9.39303e-08	0.105346	0.109	0.043	0.00157512	4	psmb4
ywhaz1	9.96404e-08	0.122663	0.7	0.472	0.00167087	4	ywhaz
ace1	1.255e-07	0.140284	0.337	0.205	0.0021045	4	ace
zgc:1748631	1.32334e-07	0.100901	0.429	0.258	0.00221911	4	zgc:174863
cox6c2	1.41943e-07	0.108076	0.185	0.09	0.00238024	4	cox6c
ntd51	1.98596e-07	0.163098	0.472	0.31	0.00333026	4	ntd5
srsf7a	2.05942e-07	0.126242	0.139	0.061	0.00345345	4	srsf7a
magi1b1	2.72415e-07	0.103702	0.314	0.188	0.00456813	4	magi1b
ndufa4l1	3.90637e-07	0.127639	0.601	0.377	0.00655059	4	ndufa4l
cdon1	6.5511e-07	0.104761	0.307	0.188	0.0109855	4	cdon
wnt11r1	6.84134e-07	0.102089	0.215	0.117	0.0114722	4	wnt11r
rsl1d11	8.35652e-07	0.121475	0.347	0.214	0.014013	4	rsl1d1
net1	8.56689e-07	0.101815	0.162	0.079	0.0143658	4	net1
si:dkeyp-9d4.2	8.6537e-07	0.123178	0.168	0.086	0.0145114	4	si:dkeyp-9d4.2
pim12	9.18966e-07	0.103907	0.33	0.196	0.0154101	4	pim1
antxr1c1	1.07135e-06	0.102584	0.251	0.14	0.0179654	4	antxr1c
slc25a3b2	1.1577e-06	0.125896	0.297	0.175	0.0194135	4	slc25a3b
bsg1	1.1631e-06	0.130033	0.591	0.387	0.0195039	4	bsg
tpx2	1.17539e-06	0.127494	0.056	0.017	0.0197101	4	tpx2
hsp90aa1.21	1.26319e-06	0.106313	0.498	0.328	0.0211825	4	hsp90aa1.2
rpl41	1.86707e-06	0.160353	0.799	0.563	0.0313089	4	rpl4
si:ch211-212k18.7	3.67373e-06	0.113404	0.201	0.111	0.0616047	4	si:ch211-212k18.7
gsdf1	4.738e-06	0.115867	0.073	0.027	0.0794514	4	gsdf
cd81a1	5.55707e-06	0.1193	0.941	0.865	0.0931865	4	cd81a
b2m1	5.9532e-06	0.205688	0.719	0.531	0.0998293	4	b2m
ccng1	9.6822e-06	0.112886	0.314	0.194	0.162361	4	ccng1
grna	1.16187e-05	0.132261	0.132	0.066	0.194834	4	grna
tmem88b1	1.23852e-05	0.104922	0.832	0.608	0.207687	4	tmem88b
hist1h4l.10	2.1876e-05	0.115606	0.172	0.096	0.366838	4	hist1h4l.10
kpna2	2.52115e-05	0.145597	0.053	0.018	0.422771	4	kpna2
p4hb	3.42697e-05	0.128126	0.135	0.071	0.574669	4	p4hb
hsd3b71	4.39736e-05	0.107093	0.102	0.048	0.737394	4	hsd3b7
hsp70.31	4.86341e-05	0.112157	0.805	0.726	0.815545	4	hsp70.3
rps171	6.06071e-05	0.110919	0.706	0.477	1	4	rps17
hmgb1a	7.52943e-05	0.13211	0.353	0.243	1	4	hmgb1a
eif3f1	0.000109005	0.102583	0.716	0.493	1	4	eif3f
ctsba1	0.000147167	0.12434	0.112	0.058	1	4	ctsba
nme2b.12	0.000169558	0.116258	0.977	0.932	1	4	nme2b.1
cox4i11	0.000172451	0.103758	0.531	0.374	1	4	cox4i1
cbx7a	0.000497543	0.103355	0.208	0.134	1	4	cbx7a
cotl11	0.000913947	0.103187	0.238	0.158	1	4	cotl1
cxcl18b1	0.00160773	0.18588	0.393	0.286	1	4	cxcl18b

## Sheet: vSMC (SC1)
	p_val	avg_logFC	pct.1	pct.2	p_val_adj	cluster	gene
csrp1b	0	2.16695	0.661	0.015	0	1	csrp1b
fhl1a	0	0.73808	0.442	0.016	0	1	fhl1a
myl6	0	1.62894	0.664	0.09	0	1	myl6
acta2	0	2.81417	0.771	0.092	0	1	acta2
myl9a	0	1.35562	0.666	0.1	0	1	myl9a
tagln	8.91445e-298	2.85869	0.863	0.326	1.49486e-293	1	tagln
cald1b	2.40465e-288	0.452384	0.282	0.002	4.03236e-284	1	cald1b
kng1	3.47457e-281	0.644687	0.517	0.055	5.8265e-277	1	kng1
fhl2a	1.41153e-255	0.873447	0.62	0.108	2.367e-251	1	fhl2a
tpm2	6.69268e-254	0.780409	0.461	0.049	1.1223e-249	1	tpm2
myh11a	1.01029e-245	1.07941	0.565	0.088	1.69416e-241	1	myh11a
desmb	6.27808e-241	0.735805	0.26	0.005	1.05277e-236	1	desmb
mylkb	2.49166e-239	0.569045	0.421	0.04	4.17826e-235	1	mylkb
ckba	2.36207e-226	0.807391	0.478	0.064	3.96096e-222	1	ckba
krt91	8.76696e-222	1.56854	0.784	0.267	1.47013e-217	1	krt91
CU468917.1	4.81067e-213	0.92408	0.492	0.075	8.06702e-209	1	CU468917.1
tpm1	2.87012e-208	1.11722	0.661	0.157	4.8129e-204	1	tpm1
rims2a	1.23558e-204	0.321231	0.221	0.004	2.07195e-200	1	rims2a
pdlim3a	3.98494e-197	0.245844	0.224	0.006	6.68235e-193	1	pdlim3a
rplp0	2.4341e-187	0.508679	1	0.987	4.08174e-183	1	rplp0
rps2	7.25522e-184	0.45552	1	0.997	1.21663e-179	1	rps2
eef1a1l2	6.28812e-182	0.423662	1	0.998	1.05446e-177	1	eef1a1l2
bhmt	1.01847e-179	0.860702	0.598	0.151	1.70786e-175	1	bhmt
smtna	6.13511e-178	0.228075	0.191	0.003	1.0288e-173	1	smtna
rpl12	2.30271e-176	0.449097	1	0.989	3.86141e-172	1	rpl12
rps7	6.41416e-168	0.455303	1	0.994	1.07559e-163	1	rps7
rpl7a	8.95739e-163	0.451509	1	0.99	1.50206e-158	1	rpl7a
rpl19	4.77597e-162	0.419177	1	0.995	8.00883e-158	1	rpl19
rpl22l1	6.86507e-158	0.879241	0.909	0.585	1.1512e-153	1	rpl22l1
lmod1b	2.08883e-152	0.469688	0.462	0.087	3.50275e-148	1	lmod1b
bves	1.34525e-151	0.184238	0.174	0.004	2.25585e-147	1	bves
slc25a5	3.18987e-151	0.585711	1	0.926	5.3491e-147	1	slc25a5
rps24	1.0529e-150	0.408236	1	0.991	1.76561e-146	1	rps24
rpl17	7.9505e-150	0.431436	1	0.985	1.33322e-145	1	rpl17
rpl7	1.14206e-149	0.428292	1	0.992	1.91512e-145	1	rpl7
myl10	7.82318e-149	0.229501	0.159	0.003	1.31187e-144	1	myl10
rpl3	2.92268e-147	0.46966	0.998	0.961	4.90105e-143	1	rpl3
rplp1	6.79323e-147	0.412293	0.998	0.996	1.13916e-142	1	rplp1
rpl24	1.1936e-145	0.415532	1	0.99	2.00155e-141	1	rpl24
rpl13	1.77023e-144	0.409351	1	0.992	2.9685e-140	1	rpl13
rpl10a	3.4578e-144	0.416513	1	0.993	5.79839e-140	1	rpl10a
rps3a	1.98151e-141	0.401467	1	0.99	3.32279e-137	1	rps3a
tpt1	2.60668e-140	0.463849	1	0.971	4.37115e-136	1	tpt1
fbxl22	7.67731e-140	0.159614	0.148	0.002	1.28741e-135	1	fbxl22
si:dkey-151g10.6	5.29849e-138	0.407191	1	0.997	8.88504e-134	1	si:dkey-151g10.6
rpl9.1	1.47991e-137	0.422404	1	0.985	2.48166e-133	1	rpl9.1
eef1b2	2.46499e-136	0.565345	0.995	0.891	4.13353e-132	1	eef1b2
grem2b	1.75795e-135	0.194221	0.161	0.005	2.94791e-131	1	grem2b
ybx1	6.49956e-135	0.498603	0.998	0.957	1.08991e-130	1	ybx1
rpl18	1.44671e-132	0.403978	0.998	0.987	2.42599e-128	1	rpl18
rpl8	2.84858e-129	0.385718	0.998	0.989	4.77678e-125	1	rpl8
eef1g	3.0031e-128	0.463372	1	0.982	5.03589e-124	1	eef1g
rps6	4.55732e-126	0.464384	0.995	0.954	7.64218e-122	1	rps6
rpl23	4.8092e-126	0.382895	1	0.989	8.06454e-122	1	rpl23
rpl15	5.70419e-126	0.442	0.997	0.97	9.56536e-122	1	rpl15
rps12	2.15948e-124	0.414657	0.998	0.987	3.62124e-120	1	rps12
rps4x	1.96279e-123	0.432337	1	0.972	3.29141e-119	1	rps4x
rps18	1.11457e-122	0.500102	0.994	0.93	1.86901e-118	1	rps18
rpl13a	1.55626e-121	0.371644	1	0.99	2.6097e-117	1	rpl13a
gem	2.37009e-121	0.3968	0.142	0.004	3.9744e-117	1	gem
rps27a	7.83072e-121	0.346356	1	0.993	1.31313e-116	1	rps27a
rps5	6.58161e-120	0.385396	0.997	0.988	1.10367e-115	1	rps5
tpm4a	1.93054e-119	0.851321	0.7	0.316	3.23731e-115	1	tpm4a
rpl11	2.80822e-119	0.393597	1	0.98	4.7091e-115	1	rpl11
rpl18a	1.44517e-118	0.376446	0.998	0.988	2.42341e-114	1	rpl18a
rpl32	3.3621e-117	0.38265	1	0.989	5.6379e-113	1	rpl32
rps14	1.66898e-116	0.340174	1	0.991	2.79871e-112	1	rps14
ntn1a	1.73449e-116	0.190119	0.2	0.016	2.90856e-112	1	ntn1a
flna	3.88862e-116	0.763046	0.502	0.146	6.52083e-112	1	flna
rps8a	1.38675e-115	0.366885	1	0.987	2.32545e-111	1	rps8a
uba52	2.01572e-115	0.369362	1	0.984	3.38016e-111	1	uba52
rpl34	3.05542e-115	0.489906	0.995	0.926	5.12364e-111	1	rpl34
rpsa	3.45962e-115	0.373345	1	0.984	5.80143e-111	1	rpsa
rplp2l	1.23081e-114	0.473448	0.995	0.96	2.06395e-110	1	rplp2l
rps15a	1.56919e-114	0.372212	1	0.983	2.63137e-110	1	rps15a
rpl31	5.94387e-113	0.393907	1	0.983	9.96727e-109	1	rpl31
cox6b1	3.32165e-112	0.274934	0.216	0.021	5.57008e-108	1	cox6b1
rpl5a	3.91074e-112	0.569509	0.984	0.799	6.55793e-108	1	rpl5a
rpl21	4.54428e-112	0.362033	0.998	0.983	7.6203e-108	1	rpl21
rpl35	1.68913e-107	0.376664	0.998	0.984	2.83249e-103	1	rpl35
rps23	4.13124e-106	0.357763	1	0.978	6.92767e-102	1	rps23
naca	6.16547e-106	0.423631	0.997	0.947	1.03389e-101	1	naca
cox7a1	2.20493e-103	0.298208	0.263	0.038	3.69745e-99	1	cox7a1
rps9	5.64203e-103	0.336109	1	0.991	9.46111e-99	1	rps9
lmod1a	2.21407e-102	0.178851	0.159	0.011	3.71278e-98	1	lmod1a
stc2a	2.32692e-100	0.286408	0.218	0.026	3.90201e-96	1	stc2a
ppp1r12a	5.59988e-100	0.264949	0.194	0.02	9.39043e-96	1	ppp1r12a
rps16	4.61561e-98	0.331677	1	0.99	7.73991e-94	1	rps16
rpl30	4.97178e-98	0.371947	1	0.968	8.33718e-94	1	rpl30
rpl28	7.93469e-98	0.318597	0.998	0.992	1.33057e-93	1	rpl28
rps3	1.78892e-97	0.413739	0.994	0.934	2.99984e-93	1	rps3
ppp1r14aa	4.55253e-96	0.238407	0.174	0.015	7.63413e-92	1	ppp1r14aa
smtnb	5.0305e-96	0.159646	0.123	0.005	8.43564e-92	1	smtnb
cap2	1.15687e-95	0.140773	0.144	0.009	1.93995e-91	1	cap2
rps10	6.1247e-95	0.316895	1	0.991	1.02705e-90	1	rps10
rpl36a	6.23502e-95	0.355185	0.998	0.985	1.04555e-90	1	rpl36a
rps15	2.22739e-94	0.326717	1	0.989	3.73511e-90	1	rps15
mibp2	6.58617e-93	0.687034	0.685	0.376	1.10443e-88	1	mibp2
rps26l	9.75331e-93	0.365979	1	0.985	1.63553e-88	1	rps26l
rbm24a	7.4609e-92	0.310257	0.241	0.038	1.25112e-87	1	rbm24a
RPS17	5.20433e-91	0.357061	0.998	0.977	8.72714e-87	1	RPS17
rpl39	6.40451e-90	0.369618	1	0.986	1.07397e-85	1	rpl39
rpl5b	1.41978e-89	0.496246	0.948	0.722	2.38083e-85	1	rpl5b
tmem47	4.40189e-89	0.257601	0.2	0.025	7.38153e-85	1	tmem47
rps13	1.27415e-88	0.325122	0.997	0.988	2.13662e-84	1	rps13
rps11	1.37486e-87	0.298293	0.998	0.989	2.3055e-83	1	rps11
actb2	1.20923e-86	0.388017	1	0.996	2.02775e-82	1	actb2
rbpms2a	5.98306e-86	0.414939	0.38	0.097	1.0033e-81	1	rbpms2a
acta1b	4.38328e-85	0.16875	0.101	0.003	7.35032e-81	1	acta1b
rack1	8.84432e-83	0.373151	0.997	0.943	1.4831e-78	1	rack1
rpl10	3.92486e-79	0.293322	0.997	0.992	6.5816e-75	1	rpl10
rpl27	5.40353e-78	0.333388	0.998	0.965	9.06117e-74	1	rpl27
faua	2.24313e-77	0.322036	0.998	0.976	3.76151e-73	1	faua
rps19	3.23925e-77	0.30596	1	0.983	5.43189e-73	1	rps19
cdh11	7.33297e-77	0.263267	0.308	0.073	1.22967e-72	1	cdh11
pcdh10a	1.21516e-76	0.145916	0.153	0.016	2.03771e-72	1	pcdh10a
rps25	1.85951e-75	0.316921	1	0.973	3.11821e-71	1	rps25
actn1	3.72781e-75	0.311149	0.338	0.091	6.25116e-71	1	actn1
pfn1	2.41044e-73	0.388463	0.391	0.116	4.04207e-69	1	pfn1
trdn	4.94395e-72	0.103299	0.077	0.001	8.29051e-68	1	trdn
jpt1b	1.04558e-70	0.572886	0.637	0.332	1.75333e-66	1	jpt1b
rps28	3.95645e-69	0.347805	0.998	0.98	6.63457e-65	1	rps28
rpl23a	2.10242e-68	0.309528	0.998	0.97	3.52554e-64	1	rpl23a
fth1a	5.40107e-68	0.639881	0.528	0.232	9.05705e-64	1	fth1a
eef2b	1.43382e-66	0.413432	0.954	0.757	2.40437e-62	1	eef2b
mdh2	5.72976e-65	0.449632	0.412	0.141	9.60824e-61	1	mdh2
rpl35a	7.19659e-64	0.331658	0.997	0.963	1.2068e-59	1	rpl35a
rpl14	1.34915e-63	0.292096	1	0.98	2.26239e-59	1	rpl14
ppiaa	3.09895e-62	0.344948	0.992	0.919	5.19663e-58	1	ppiaa
rpl36	6.92202e-62	0.325251	0.994	0.953	1.16075e-57	1	rpl36
mdka	8.30032e-62	0.555222	0.538	0.236	1.39188e-57	1	mdka
RPL37A	1.02453e-60	0.309376	0.998	0.978	1.71803e-56	1	RPL37A
pde9a	2.63917e-60	0.110247	0.114	0.011	4.42562e-56	1	pde9a
glipr2l	1.4696e-59	0.173868	0.129	0.015	2.46438e-55	1	glipr2l
igf2a	1.52123e-58	0.239796	0.181	0.033	2.55094e-54	1	igf2a
rps26	3.17552e-58	0.324119	0.998	0.961	5.32503e-54	1	rps26
rpl37.1	4.95474e-57	0.294822	0.997	0.981	8.30861e-53	1	rpl37.1
rps27.1	1.44359e-56	0.284937	0.995	0.969	2.42076e-52	1	rps27.1
atp5mc3b	2.52428e-55	0.568331	0.521	0.252	4.23297e-51	1	atp5mc3b
rpl22	5.15068e-55	0.290502	0.997	0.958	8.63718e-51	1	rpl22
si:ch211-270g19.5	4.74124e-54	0.161509	0.26	0.067	7.95059e-50	1	si:ch211-270g19.5
rsl24d1	8.66023e-52	0.405082	0.833	0.637	1.45223e-47	1	rsl24d1
rps17	1.34282e-50	0.498364	0.691	0.464	2.25177e-46	1	rps17
cox8b	9.48686e-49	0.190122	0.18	0.038	1.59085e-44	1	cox8b
rpl4	4.66645e-47	0.432761	0.737	0.555	7.82517e-43	1	rpl4
btf3	5.09894e-47	0.33459	0.964	0.823	8.55042e-43	1	btf3
eif3f	2.65226e-46	0.429282	0.697	0.481	4.44757e-42	1	eif3f
hsp90ab1	2.84873e-45	0.242486	0.994	0.987	4.77703e-41	1	hsp90ab1
rpl38	8.53597e-45	0.30867	0.995	0.945	1.4314e-40	1	rpl38
rps29	1.00512e-44	0.281397	1	0.984	1.68549e-40	1	rps29
mdkb	2.49542e-44	0.122248	0.117	0.018	4.18457e-40	1	mdkb
nme2b.2	6.56753e-43	0.190446	0.095	0.011	1.10131e-38	1	nme2b.2
mdh1aa	9.79396e-43	0.14441	0.263	0.082	1.64235e-38	1	mdh1aa
cnot6l	2.56438e-42	0.150873	0.199	0.053	4.30021e-38	1	cnot6l
fn1b	3.48345e-42	0.325027	0.409	0.174	5.8414e-38	1	fn1b
cotl1	4.5046e-42	0.252602	0.358	0.137	7.55377e-38	1	cotl1
BX088707.3	9.92809e-42	0.204707	0.382	0.15	1.66484e-37	1	BX088707.3
eif3ha	2.21714e-41	0.323246	0.47	0.228	3.71793e-37	1	eif3ha
rps27.2	6.82951e-41	0.261692	0.992	0.915	1.14524e-36	1	rps27.2
slc25a3b	1.64848e-40	0.315156	0.382	0.156	2.76434e-36	1	slc25a3b
rpl29	6.60963e-40	0.354311	0.923	0.677	1.10837e-35	1	rpl29
nme3	7.2768e-40	0.185737	0.224	0.066	1.22025e-35	1	nme3
plaub	7.3377e-39	0.186313	0.192	0.053	1.23046e-34	1	plaub
zgc:122979	1.3542e-38	0.110978	0.074	0.007	2.27086e-34	1	zgc:122979
meis2b	3.07099e-38	0.120833	0.147	0.033	5.14974e-34	1	meis2b
adh5	1.50011e-37	0.398912	0.588	0.382	2.51553e-33	1	adh5
ptmaa	3.03128e-37	0.262606	0.532	0.281	5.08315e-33	1	ptmaa
zgc:153867	5.0554e-37	0.419573	0.692	0.468	8.47741e-33	1	zgc:153867
mylka	2.50864e-36	0.169573	0.254	0.089	4.20673e-32	1	mylka
ldhba	1.31815e-35	0.158592	0.186	0.051	2.21041e-31	1	ldhba
eif2s1b	6.05781e-35	0.261613	0.405	0.185	1.01583e-30	1	eif2s1b
eif4a1b	1.34973e-33	0.3923	0.563	0.371	2.26336e-29	1	eif4a1b
daam1a	2.85134e-33	0.192402	0.226	0.078	4.78141e-29	1	daam1a
eef1da	1.31548e-32	0.3546	0.806	0.641	2.20593e-28	1	eef1da
atp5f1b	5.65082e-32	0.312804	0.33	0.139	9.47587e-28	1	atp5f1b
rps21	5.22054e-31	0.251462	0.998	0.972	8.75432e-27	1	rps21
cd82a	2.43954e-30	0.139217	0.183	0.058	4.09086e-26	1	cd82a
fxyd1	7.47064e-30	0.340188	0.382	0.193	1.25275e-25	1	fxyd1
vdac1	7.71187e-30	0.237413	0.295	0.124	1.2932e-25	1	vdac1
idh2	1.0667e-29	0.169243	0.268	0.105	1.78875e-25	1	idh2
eif3i	1.4088e-29	0.212678	0.298	0.126	2.36241e-25	1	eif3i
si:dkey-239h2.3	1.97003e-29	0.226353	0.262	0.104	3.30354e-25	1	si:dkey-239h2.3
si:dkey-51e6.1	3.64049e-29	0.197844	0.285	0.12	6.10473e-25	1	si:dkey-51e6.1
cox6b2	5.97446e-29	0.382798	0.533	0.327	1.00186e-24	1	cox6b2
nsa2	9.43892e-29	0.330508	0.707	0.546	1.58281e-24	1	nsa2
inka1a	5.79886e-28	0.119753	0.3	0.126	9.72411e-24	1	inka1a
tmsb2	1.04924e-27	0.109831	0.101	0.022	1.75947e-23	1	tmsb2
hoxc3a	3.3801e-27	0.111309	0.147	0.043	5.66808e-23	1	hoxc3a
dnpep	3.56224e-27	0.108896	0.137	0.038	5.97353e-23	1	dnpep
boka	3.65482e-27	0.136137	0.15	0.045	6.12876e-23	1	boka
iscub	2.19819e-26	0.12691	0.128	0.034	3.68615e-22	1	iscub
vdac3	7.56205e-26	0.156541	0.273	0.115	1.26808e-21	1	vdac3
tmem119b	1.08482e-25	0.117685	0.226	0.088	1.81914e-21	1	tmem119b
CABZ01092746.1	1.15553e-25	0.116776	0.292	0.125	1.9377e-21	1	CABZ01092746.1
vdac2	3.62658e-25	0.332386	0.506	0.319	6.08142e-21	1	vdac2
atp5f1e	3.72344e-25	0.202423	0.256	0.106	6.24384e-21	1	atp5f1e
tpm4b	4.56489e-25	0.158607	0.24	0.101	7.65487e-21	1	tpm4b
ola1	5.25961e-25	0.253874	0.432	0.237	8.81983e-21	1	ola1
sorbs3	5.8388e-25	0.118339	0.134	0.039	9.79109e-21	1	sorbs3
pno1	1.01021e-24	0.198435	0.339	0.164	1.69402e-20	1	pno1
fhl3a	1.99692e-24	0.110441	0.158	0.052	3.34864e-20	1	fhl3a
cfl1	2.24214e-24	0.37697	0.503	0.314	3.75984e-20	1	cfl1
eef1db	2.96596e-24	0.311122	0.595	0.412	4.97361e-20	1	eef1db
rpl6	4.0292e-24	0.351075	0.628	0.454	6.75656e-20	1	rpl6
ppiab	5.83184e-24	0.34783	0.639	0.428	9.77941e-20	1	ppiab
pbxip1b	7.4279e-24	0.142817	0.197	0.074	1.24559e-19	1	pbxip1b
cct5	7.78768e-24	0.239159	0.315	0.153	1.30592e-19	1	cct5
eif3s6ip	1.12315e-23	0.196057	0.371	0.188	1.88341e-19	1	eif3s6ip
eif5a	1.4838e-23	0.269566	0.522	0.312	2.48819e-19	1	eif5a
cct8	1.57927e-23	0.135188	0.233	0.095	2.64828e-19	1	cct8
capza1b	4.09313e-23	0.12069	0.205	0.079	6.86376e-19	1	capza1b
rpl26	9.39227e-23	0.131137	0.192	0.073	1.57499e-18	1	rpl26
rplp2	1.15374e-22	0.208042	0.995	0.906	1.9347e-18	1	rplp2
vbp1	1.79236e-22	0.108008	0.137	0.043	3.00562e-18	1	vbp1
cct7	2.86146e-22	0.20937	0.273	0.127	4.79838e-18	1	cct7
COX5B	5.19959e-22	0.198225	0.265	0.118	8.7192e-18	1	COX5B
cavin1b	8.63071e-22	0.155697	0.233	0.1	1.44728e-17	1	cavin1b
cox5aa	7.39367e-20	0.137568	0.169	0.063	1.23984e-15	1	cox5aa
myo1ca	1.72883e-19	0.162222	0.224	0.105	2.89907e-15	1	myo1ca
cox4i1	3.5569e-19	0.268943	0.555	0.36	5.96457e-15	1	cox4i1
tmsb4x	5.14669e-19	0.195994	0.998	0.992	8.63049e-15	1	tmsb4x
cdc42ep3	7.38565e-19	0.11054	0.167	0.067	1.2385e-14	1	cdc42ep3
eif3c	7.57483e-19	0.141697	0.248	0.116	1.27022e-14	1	eif3c
atp5l	4.00983e-18	0.1697	0.298	0.15	6.72409e-14	1	atp5l
mprip	1.57881e-17	0.114561	0.134	0.05	2.6475e-13	1	mprip
ak1	1.82002e-17	0.102374	0.155	0.061	3.05198e-13	1	ak1
tomm5	3.37214e-17	0.182885	0.383	0.218	5.65474e-13	1	tomm5
eif2s3	8.7168e-17	0.238306	0.416	0.259	1.46172e-12	1	eif2s3
cct6a	1.57384e-16	0.227794	0.396	0.239	2.63917e-12	1	cct6a
atp5po	8.69437e-16	0.157655	0.257	0.133	1.45796e-11	1	atp5po
atp5f1c	1.30885e-15	0.115872	0.202	0.094	2.1948e-11	1	atp5f1c
naa10	2.09822e-15	0.124797	0.26	0.133	3.51851e-11	1	naa10
eno3	2.2924e-15	0.131394	0.189	0.085	3.84412e-11	1	eno3
gtpbp4	6.16156e-15	0.23016	0.388	0.248	1.03323e-10	1	gtpbp4
eif3g	1.47061e-14	0.233308	0.532	0.384	2.46606e-10	1	eif3g
ndufa4l	7.83134e-14	0.234823	0.527	0.372	1.31324e-09	1	ndufa4l
rsl1d1	1.87854e-13	0.138594	0.347	0.205	3.15013e-09	1	rsl1d1
zgc:193541	2.3821e-13	0.157377	0.281	0.157	3.99454e-09	1	zgc:193541
romo1	2.6327e-13	0.223968	0.683	0.546	4.41477e-09	1	romo1
eif3ea	4.82401e-13	0.220239	0.491	0.356	8.08939e-09	1	eif3ea
gyg1a	3.40376e-12	0.134796	0.096	0.036	5.70776e-08	1	gyg1a
eif3k	6.18829e-12	0.144162	0.344	0.212	1.03771e-07	1	eif3k
lxn1	8.86128e-12	0.246483	0.744	0.656	1.48595e-07	1	lxn
atp5fa1	8.938e-12	0.103001	0.205	0.106	1.49881e-07	1	atp5fa1
cox7b	4.33198e-11	0.142055	0.185	0.097	7.26429e-07	1	cox7b
irs2b	5.64722e-11	0.112617	0.166	0.085	9.46983e-07	1	irs2b
atp5pb	5.76598e-11	0.120533	0.26	0.147	9.66897e-07	1	atp5pb
cct2.1	8.36695e-11	0.138187	0.328	0.206	1.40305e-06	1	cct2.1
cox6c	9.68289e-11	0.132038	0.167	0.086	1.62372e-06	1	cox6c
eif3m	2.28895e-10	0.196269	0.569	0.423	3.83834e-06	1	eif3m
cct3	8.08402e-10	0.107554	0.235	0.137	1.35561e-05	1	cct3
gapdhs	2.2757e-09	0.112962	0.379	0.252	3.81613e-05	1	gapdhs
nop53	2.36718e-09	0.13056	0.434	0.296	3.96953e-05	1	nop53
atp6v0e1	1.28314e-08	0.137054	0.437	0.314	0.000215171	1	atp6v0e1
fabp3	5.52389e-08	0.107368	0.459	0.324	0.000926301	1	fabp3
pabpc1a	1.54659e-07	0.192667	0.598	0.48	0.00259348	1	pabpc1a
nme2b.11	4.15657e-07	0.134526	0.975	0.93	0.00697016	1	nme2b.1
lgals2a	1.10424e-06	0.189844	0.107	0.058	0.018517	1	lgals2a
ran	5.48941e-06	0.14349	0.517	0.384	0.092052	1	ran
sec61g	5.97944e-06	0.148385	0.678	0.57	0.100269	1	sec61g
h1m	6.05496e-06	0.200404	0.065	0.03	0.101536	1	h1m
myl9b	1.87119e-05	0.101471	0.45	0.344	0.313781	1	myl9b
cldnd	2.39434e-05	0.278401	0.117	0.071	0.401507	1	cldnd

## Sheet: Pericytes (SC2)
	p_val	avg_logFC	pct.1	pct.2	p_val_adj	cluster	gene
rgs5a	0	1.58345	0.624	0.048	0	2	rgs5a
notch3	0	1.164	0.498	0.026	0	2	notch3
si:ch211-270g19.51	0	0.980739	0.559	0.045	0	2	si:ch211-270g19.5
rasl12	0	0.917611	0.429	0.003	0	2	rasl12
eva1bb	0	0.63029	0.468	0.014	0	2	eva1bb
tbx2b	0	0.603592	0.387	0.01	0	2	tbx2b
plp1b	0	0.60217	0.328	0.002	0	2	plp1b
mcamb	0	0.510001	0.353	0.007	0	2	mcamb
slc20a1a	2.61121e-286	0.403323	0.298	0.004	4.37874e-282	2	slc20a1a
rbpms2b	3.18056e-285	1.07886	0.458	0.031	5.33348e-281	2	rbpms2b
ndufa4l2a	6.64742e-274	0.682454	0.313	0.008	1.11471e-269	2	ndufa4l2a
epas1a	4.62075e-269	0.336413	0.279	0.004	7.74853e-265	2	epas1a
mef2cb	2.28807e-256	0.42127	0.321	0.011	3.83687e-252	2	mef2cb
AL954322.2	3.02779e-237	0.370666	0.284	0.008	5.0773e-233	2	AL954322.2
atp1a1b	2.29022e-236	0.429928	0.33	0.015	3.84048e-232	2	atp1a1b
sh3d21	9.75196e-233	0.447554	0.33	0.016	1.63531e-228	2	sh3d21
si:ch73-193i22.1	6.94466e-228	0.425174	0.286	0.01	1.16455e-223	2	si:ch73-193i22.1
rgs4	7.40683e-212	0.43693	0.324	0.018	1.24205e-207	2	rgs4
tspan18a	1.10876e-201	0.42455	0.273	0.011	1.85929e-197	2	tspan18a
rgs5b	9.09185e-196	1.65637	0.403	0.04	1.52461e-191	2	rgs5b
pcdh1b	9.35294e-194	0.23896	0.212	0.004	1.56839e-189	2	pcdh1b
prx	1.31765e-181	0.285636	0.185	0.002	2.20956e-177	2	prx
pcdh18a	4.59461e-176	0.730215	0.391	0.045	7.7047e-172	2	pcdh18a
tcf15	4.6128e-157	0.253422	0.212	0.009	7.73521e-153	2	tcf15
BX088707.31	4.63156e-157	1.08891	0.586	0.138	7.76667e-153	2	BX088707.3
BX901920.1	3.36036e-151	0.465719	0.158	0.002	5.63499e-147	2	BX901920.1
sorbs2b	7.53732e-149	0.225404	0.155	0.002	1.26393e-144	2	sorbs2b
tpm11	1.68882e-144	1.41954	0.616	0.177	2.83198e-140	2	tpm1
inka1a1	1.95473e-144	0.787663	0.519	0.11	3.27788e-140	2	inka1a
eva1a	1.74933e-141	0.213262	0.166	0.004	2.93345e-137	2	eva1a
ncaldb	2.54122e-141	0.226645	0.202	0.009	4.26138e-137	2	ncaldb
pgfb	1.71534e-140	0.217114	0.162	0.004	2.87646e-136	2	pgfb
ifitm1	2.99077e-138	0.626927	0.319	0.034	5.01522e-134	2	ifitm1
atp2a3	1.23136e-137	0.242764	0.204	0.01	2.06487e-133	2	atp2a3
crip1	4.07706e-134	0.953387	0.38	0.057	6.83683e-130	2	crip1
npr1b	4.1837e-134	0.152165	0.134	0.001	7.01564e-130	2	npr1b
TCIM (1 of many)	4.70493e-132	1.18486	0.181	0.008	7.88969e-128	2	TCIM (1 of many)
vegfc	2.06065e-130	0.238891	0.139	0.002	3.4555e-126	2	vegfc
htra3a	7.56155e-130	0.302554	0.206	0.012	1.268e-125	2	htra3a
kcne4	1.10227e-127	0.540229	0.223	0.016	1.84839e-123	2	kcne4
BX322618.1	3.26747e-127	0.339003	0.149	0.004	5.47923e-123	2	BX322618.1
si:dkey-27i16.2	5.20559e-124	0.382867	0.164	0.006	8.72925e-120	2	si:dkey-27i16.2
oaz2a	3.48808e-120	0.526678	0.374	0.065	5.84915e-116	2	oaz2a
adora2aa	1.24348e-117	0.149148	0.111	0.001	2.08519e-113	2	adora2aa
atp1b4	4.6758e-114	0.327455	0.252	0.026	7.84085e-110	2	atp1b4
ptmaa1	2.20506e-113	1.2692	0.666	0.276	3.69766e-109	2	ptmaa
zeb2a	5.80414e-113	0.661263	0.481	0.122	9.73296e-109	2	zeb2a
cxcl12b	1.04087e-112	1.25845	0.244	0.026	1.74543e-108	2	cxcl12b
pabpc4	5.94914e-111	0.220478	0.16	0.008	9.97612e-107	2	pabpc4
pkib	2.83294e-108	0.140066	0.105	0.001	4.75056e-104	2	pkib
ednraa	6.89722e-108	0.43008	0.359	0.065	1.15659e-103	2	ednraa
prr15la	1.207e-106	0.195885	0.095	0	2.02403e-102	2	prr15la
cldnb	1.3921e-105	0.828414	0.118	0.002	2.33442e-101	2	cldnb
agtr2	1.23123e-104	0.590007	0.382	0.079	2.06465e-100	2	agtr2
pklr	5.07463e-104	0.362418	0.107	0.001	8.50964e-100	2	pklr
pln	1.50984e-102	0.444139	0.187	0.014	2.53184e-98	2	pln
cldnh	5.40619e-102	0.747734	0.107	0.002	9.06565e-98	2	cldnh
si:dkey-33i11.9	1.3418e-101	0.294625	0.105	0.001	2.25006e-97	2	si:dkey-33i11.9
camk2d1	5.10569e-101	0.159176	0.145	0.007	8.56173e-97	2	camk2d1
arhgap36	3.9114e-100	0.16312	0.128	0.004	6.55903e-96	2	arhgap36
bik	2.74522e-99	0.230803	0.103	0.001	4.60345e-95	2	bik
BX248082.1	2.93006e-99	0.159947	0.113	0.003	4.91342e-95	2	BX248082.1
adra1bb	6.76587e-99	0.111718	0.099	0.001	1.13457e-94	2	adra1bb
jam3a	8.10619e-99	0.188148	0.155	0.009	1.35933e-94	2	jam3a
spdya	1.35661e-98	0.215232	0.118	0.003	2.2749e-94	2	spdya
arl4aa	4.13607e-95	0.220772	0.111	0.003	6.93578e-91	2	arl4aa
col4a1	8.5564e-93	0.718167	0.517	0.168	1.43482e-88	2	col4a1
myo1b	1.5323e-91	0.260312	0.225	0.027	2.56952e-87	2	myo1b
cdc42ep4a	1.89677e-91	0.127344	0.12	0.004	3.1807e-87	2	cdc42ep4a
camk2n1a	2.16495e-91	0.272711	0.176	0.015	3.6304e-87	2	camk2n1a
ebf3a	5.45348e-91	0.143032	0.132	0.006	9.14495e-87	2	ebf3a
rassf4	9.65859e-90	0.232868	0.185	0.017	1.61965e-85	2	rassf4
2020-09-15	2.00384e-89	0.377775	0.214	0.025	3.36023e-85	2	2020-09-15
en1b	8.86761e-89	0.134827	0.099	0.002	1.48701e-84	2	en1b
sgk2a	1.31887e-87	0.275944	0.101	0.002	2.21161e-83	2	sgk2a
pdlim2	1.41486e-86	0.267499	0.187	0.019	2.37258e-82	2	pdlim2
cdh17	6.35634e-86	0.46855	0.092	0.002	1.06589e-81	2	cdh17
si:ch211-139a5.9	2.36397e-84	1.0428	0.101	0.003	3.96414e-80	2	si:ch211-139a5.9
si:ch211-195b13.1	6.7731e-84	0.321517	0.162	0.014	1.13578e-79	2	si:ch211-195b13.1
prss35	2.64956e-83	0.552908	0.355	0.082	4.44305e-79	2	prss35
arhgap42a	3.95392e-83	0.202043	0.183	0.019	6.63033e-79	2	arhgap42a
rnd2	6.85733e-83	0.107761	0.086	0.001	1.14991e-78	2	rnd2
epas1b	4.49797e-82	0.430258	0.355	0.083	7.54265e-78	2	epas1b
fbp1b	2.12571e-81	0.415024	0.088	0.002	3.56461e-77	2	fbp1b
nck2b	4.59248e-81	0.34198	0.309	0.062	7.70113e-77	2	nck2b
nrarpa	6.44779e-80	0.341213	0.158	0.014	1.08123e-75	2	nrarpa
pag1	6.5671e-80	0.183841	0.153	0.013	1.10124e-75	2	pag1
atp1a1a.4	6.79458e-80	0.669093	0.09	0.002	1.13938e-75	2	atp1a1a.4
spint1a	1.09621e-78	0.215734	0.103	0.004	1.83823e-74	2	spint1a
ucp1	1.75075e-78	1.41044	0.082	0.001	2.93583e-74	2	ucp1
fhl3b	2.62741e-77	0.402844	0.359	0.088	4.4059e-73	2	fhl3b
stk17al	4.15271e-77	0.488438	0.242	0.04	6.96367e-73	2	stk17al
alkbh3.1	2.92135e-76	0.581932	0.261	0.046	4.89882e-72	2	alkbh3.1
lgals2b	4.68033e-76	1.44378	0.095	0.003	7.84845e-72	2	lgals2b
tmem45b	1.06393e-75	0.113988	0.076	0.001	1.7841e-71	2	tmem45b
agxta	2.1659e-75	0.179993	0.086	0.002	3.63199e-71	2	agxta
pdgfrb	1.21488e-74	0.933313	0.609	0.314	2.03723e-70	2	pdgfrb
snai1a	7.56474e-73	0.411724	0.231	0.038	1.26853e-68	2	snai1a
tmem119b1	3.34669e-72	0.430488	0.334	0.082	5.61206e-68	2	tmem119b
stard13a	8.88222e-71	0.12439	0.116	0.007	1.48946e-66	2	stard13a
pde5ab	1.41211e-70	0.105016	0.116	0.007	2.36796e-66	2	pde5ab
elf3	2.24424e-70	0.401137	0.086	0.003	3.76336e-66	2	elf3
mylka1	6.32034e-70	0.385938	0.338	0.086	1.05986e-65	2	mylka
arr3b	1.67508e-69	0.113186	0.097	0.004	2.80893e-65	2	arr3b
col4a2	3.8567e-69	0.541109	0.433	0.143	6.4673e-65	2	col4a2
rem1	4.0025e-69	0.3173	0.214	0.033	6.7118e-65	2	rem1
malb	9.54561e-69	0.333973	0.065	0	1.6007e-64	2	malb
flrt3	1.66644e-68	0.227784	0.191	0.027	2.79445e-64	2	flrt3
angptl2b	1.83528e-66	0.230391	0.197	0.029	3.07758e-62	2	angptl2b
pdzk1	1.94985e-66	0.378098	0.063	0	3.2697e-62	2	pdzk1
g6pca.2	2.02932e-66	0.207308	0.065	0.001	3.40297e-62	2	g6pca.2
epcam	5.92654e-64	0.817613	0.172	0.023	9.93821e-60	2	epcam
spint2	4.96014e-63	0.257589	0.116	0.009	8.31766e-59	2	spint2
kctd12.2	1.9359e-62	0.513336	0.284	0.067	3.24631e-58	2	kctd12.2
CU682777.2	4.58974e-62	0.207628	0.074	0.002	7.69654e-58	2	CU682777.2
SMIM22	1.17487e-61	0.219591	0.103	0.007	1.97014e-57	2	SMIM22
s1pr1	1.95579e-61	0.150043	0.101	0.006	3.27966e-57	2	s1pr1
fxyd6l	3.8448e-61	0.929281	0.487	0.212	6.44735e-57	2	fxyd6l
pdzk1ip1	5.30414e-61	0.286426	0.069	0.002	8.89452e-57	2	pdzk1ip1
cables2b	8.23363e-61	0.137836	0.111	0.009	1.3807e-56	2	cables2b
pvalb9	1.3233e-60	1.08737	0.067	0.001	2.21905e-56	2	pvalb9
gapdh	1.86401e-60	0.940474	0.16	0.021	3.12575e-56	2	gapdh
ppp1r3cb	5.15328e-60	0.228168	0.181	0.027	8.64154e-56	2	ppp1r3cb
gadd45ab	6.25815e-60	0.531753	0.231	0.046	1.04943e-55	2	gadd45ab
pnp6	1.40454e-59	0.308275	0.055	0	2.35527e-55	2	pnp6
tm4sf4	1.9953e-59	0.213715	0.057	0	3.34592e-55	2	tm4sf4
hpca	1.21605e-58	0.153156	0.143	0.017	2.03919e-54	2	hpca
si:dkey-194e6.1	2.53351e-58	0.622503	0.071	0.002	4.24844e-54	2	si:dkey-194e6.1
myh11a1	7.94484e-58	0.563421	0.384	0.12	1.33227e-53	2	myh11a
tmem176l.4	2.6293e-57	0.132739	0.059	0.001	4.40907e-53	2	tmem176l.4
c1qtnf5	3.339e-57	0.323593	0.33	0.092	5.59916e-53	2	c1qtnf5
pkp3a	1.58355e-56	0.129381	0.082	0.004	2.65545e-52	2	pkp3a
hey2	5.40091e-56	0.145035	0.078	0.003	9.05678e-52	2	hey2
zgc:92630	3.48283e-55	0.23903	0.084	0.005	5.84036e-51	2	zgc:92630
agxtb	7.12648e-55	0.292326	0.055	0.001	1.19504e-50	2	agxtb
grhprb	7.24802e-55	0.220867	0.055	0.001	1.21542e-50	2	grhprb
si:dkey-61f9.1.1	8.1751e-55	0.210437	0.055	0.001	1.37088e-50	2	si:dkey-61f9.1.1
si:ch211-195m9.3	3.70839e-53	0.376464	0.212	0.044	6.2186e-49	2	si:ch211-195m9.3
sorbs31	7.3901e-53	0.214526	0.195	0.036	1.23925e-48	2	sorbs3
ftcd	9.44997e-53	0.215606	0.055	0.001	1.58467e-48	2	ftcd
rida	6.48882e-52	0.579505	0.097	0.008	1.08811e-47	2	rida
rbpms2a1	3.24828e-49	0.539228	0.332	0.111	5.44704e-45	2	rbpms2a
upb1	6.41907e-49	0.1017	0.061	0.002	1.07641e-44	2	upb1
cnnm2b	7.07721e-49	0.127935	0.12	0.014	1.18678e-44	2	cnnm2b
cox5b2	9.81897e-49	0.199949	0.097	0.009	1.64654e-44	2	cox5b2
agr2	2.68696e-48	0.398016	0.076	0.004	4.50577e-44	2	agr2
col18a1b	3.16235e-48	0.139364	0.059	0.002	5.30294e-44	2	col18a1b
eps8l3a	1.10719e-47	0.102095	0.057	0.002	1.85665e-43	2	eps8l3a
ahcyl1	1.6689e-47	0.22791	0.101	0.01	2.79857e-43	2	ahcyl1
cnn3a	1.00256e-46	0.403968	0.296	0.092	1.6812e-42	2	cnn3a
gpd1b	1.93993e-46	0.18421	0.074	0.004	3.25307e-42	2	gpd1b
mt2	3.24281e-46	1.16028	0.158	0.028	5.43786e-42	2	mt2
tnks1bp1	9.64497e-46	0.205564	0.099	0.01	1.61736e-41	2	tnks1bp1
cxcl12a1	1.13297e-45	0.722706	0.116	0.459	1.89988e-41	2	cxcl12a
anks1b	1.53181e-45	0.161409	0.155	0.027	2.56869e-41	2	anks1b
krt97	1.64192e-45	0.90313	0.055	0.002	2.75334e-41	2	krt97
krt5	1.78578e-45	1.97003	0.076	0.005	2.99457e-41	2	krt5
si:dkey-87o1.2	1.79206e-45	0.117193	0.069	0.004	3.0051e-41	2	si:dkey-87o1.2
dusp1	1.87005e-45	0.579347	0.303	0.098	3.13589e-41	2	dusp1
im:7152348	3.16574e-45	0.311063	0.227	0.056	5.30863e-41	2	im:7152348
aplnra	6.78006e-45	0.200553	0.124	0.017	1.13695e-40	2	aplnra
s1pr5a	8.27391e-45	0.240079	0.216	0.052	1.38745e-40	2	s1pr5a
vegfaa	2.57135e-44	0.388503	0.313	0.101	4.31189e-40	2	vegfaa
st3gal7	3.27117e-44	0.15127	0.09	0.008	5.48542e-40	2	st3gal7
her6	5.69079e-44	1.30682	0.521	0.273	9.54288e-40	2	her6
si:ch211-79k12.1	6.69591e-44	0.230485	0.113	0.014	1.12284e-39	2	si:ch211-79k12.1
calm2a	1.62426e-43	0.712519	0.389	0.17	2.72372e-39	2	calm2a
ppp1r14aa1	2.51317e-43	0.241327	0.141	0.023	4.21433e-39	2	ppp1r14aa
anpepb	2.59846e-43	0.13175	0.053	0.002	4.35736e-39	2	anpepb
prr13	1.13606e-42	0.182737	0.113	0.015	1.90506e-38	2	prr13
pah	1.3819e-42	0.248367	0.059	0.003	2.3173e-38	2	pah
ugt1a7	4.0875e-42	0.131122	0.103	0.012	6.85432e-38	2	ugt1a7
zgc:162989	8.15351e-42	0.140547	0.065	0.004	1.36726e-37	2	zgc:162989
btbd6a	1.7992e-41	0.124286	0.107	0.013	3.01707e-37	2	btbd6a
CABZ01044746.1	1.83289e-41	0.200453	0.141	0.024	3.07357e-37	2	CABZ01044746.1
si:dkey-193p11.2	1.31041e-40	1.27463	0.057	0.003	2.19743e-36	2	si:dkey-193p11.2
idh1	3.48314e-40	0.228062	0.092	0.01	5.84087e-36	2	idh1
acy3.2	7.91298e-40	0.242053	0.065	0.004	1.32693e-35	2	acy3.2
aldob	1.08089e-39	1.75393	0.216	0.061	1.81255e-35	2	aldob
si:ch211-201h21.5	4.96915e-39	0.171	0.053	0.002	8.33278e-35	2	si:ch211-201h21.5
si:dkey-262k9.2	9.47745e-39	0.140196	0.065	0.004	1.58927e-34	2	si:dkey-262k9.2
oclna	9.64826e-39	0.133134	0.078	0.007	1.61792e-34	2	oclna
ptbp1b	4.70704e-38	0.194089	0.145	0.028	7.89323e-34	2	ptbp1b
sgk1	1.09129e-37	0.180249	0.116	0.018	1.82998e-33	2	sgk1
rassf1	1.95406e-37	0.228597	0.212	0.058	3.27677e-33	2	rassf1
sept8a	2.66409e-37	0.230329	0.164	0.036	4.46742e-33	2	sept8a
il13ra1	3.4538e-37	0.196105	0.185	0.045	5.79168e-33	2	il13ra1
tnfrsf11b	3.73238e-37	0.412478	0.057	0.003	6.25883e-33	2	tnfrsf11b
zak	8.48027e-37	0.122022	0.116	0.018	1.42206e-32	2	zak
hnf1bb	4.88803e-36	0.148808	0.059	0.004	8.19674e-32	2	hnf1bb
cd9b	6.00631e-36	0.162758	0.084	0.009	1.0072e-31	2	cd9b
zgc:165573	1.16499e-35	0.110629	0.069	0.006	1.95357e-31	2	zgc:165573
slc11a2	1.18371e-35	0.133161	0.095	0.012	1.98497e-31	2	slc11a2
sost	3.52644e-35	0.326813	0.193	0.051	5.91348e-31	2	sost
sephs2	3.65647e-35	0.11921	0.071	0.007	6.13154e-31	2	sephs2
cyp4t8	3.6968e-35	0.31275	0.061	0.004	6.19916e-31	2	cyp4t8
rasl11a	1.08429e-34	0.193221	0.197	0.053	1.81824e-30	2	rasl11a
cd248a	1.31014e-34	0.543489	0.532	0.327	2.19697e-30	2	cd248a
sox13	1.42209e-34	0.10165	0.071	0.007	2.3847e-30	2	sox13
CR753876.1	2.21469e-34	0.150679	0.084	0.01	3.71382e-30	2	CR753876.1
bgnb	8.26666e-34	0.124306	0.107	0.017	1.38624e-29	2	bgnb
sik1	2.31058e-33	0.357373	0.214	0.064	3.8746e-29	2	sik1
fosb	3.32483e-33	0.793037	0.681	0.45	5.57541e-29	2	fosb
gdpd2	1.15758e-30	0.132434	0.076	0.009	1.94115e-26	2	gdpd2
dhrs3b	1.46186e-30	0.297134	0.275	0.102	2.45139e-26	2	dhrs3b
cfap45	4.09663e-30	0.115756	0.101	0.017	6.86964e-26	2	cfap45
pear1	4.69487e-30	0.120165	0.13	0.028	7.87283e-26	2	pear1
htatip2	8.85173e-30	0.133969	0.141	0.032	1.48435e-25	2	htatip2
vcam1b	1.17317e-29	0.401811	0.345	0.159	1.96728e-25	2	vcam1b
zgc:153284	1.28759e-29	0.110039	0.055	0.004	2.15916e-25	2	zgc:153284
gclc	9.55396e-29	0.116775	0.071	0.009	1.6021e-24	2	gclc
lnx2b	1.00875e-28	0.112569	0.082	0.012	1.69157e-24	2	lnx2b
gcshb	2.24277e-28	0.152077	0.076	0.01	3.76091e-24	2	gcshb
prnprs3	2.41976e-28	0.122011	0.124	0.027	4.0577e-24	2	prnprs3
lama4	3.52864e-28	0.388338	0.363	0.18	5.91717e-24	2	lama4
dnase1l4.2	8.69015e-28	0.102661	0.074	0.01	1.45725e-23	2	dnase1l4.2
zgc:153911	1.98966e-27	0.265686	0.065	0.008	3.33646e-23	2	zgc:153911
tdh	6.25956e-27	0.374113	0.147	0.039	1.04967e-22	2	tdh
tril	2.88042e-26	0.165217	0.183	0.056	4.83017e-22	2	tril
ebf1b	3.9351e-26	0.143378	0.164	0.047	6.59877e-22	2	ebf1b
iscub1	6.9831e-26	0.202604	0.139	0.036	1.171e-21	2	iscub
dusp6	1.15068e-25	0.129131	0.128	0.031	1.92957e-21	2	dusp6
nr4a1	1.21127e-25	0.254116	0.09	0.016	2.03118e-21	2	nr4a1
ldhba1	2.87521e-25	0.428963	0.176	0.056	4.82144e-21	2	ldhba
slc25a51	5.62696e-25	0.375391	0.977	0.93	9.43585e-21	2	slc25a5
ak11	6.71542e-25	0.238839	0.185	0.061	1.12611e-20	2	ak1
vasna	1.40526e-24	0.154454	0.174	0.055	2.35647e-20	2	vasna
uqcrc2b	2.1746e-24	0.101082	0.084	0.015	3.64658e-20	2	uqcrc2b
nav3	2.6633e-24	0.100228	0.105	0.023	4.46609e-20	2	nav3
wu:fj16a03	4.62459e-24	0.46674	0.109	0.025	7.75498e-20	2	wu:fj16a03
ptenb	1.09842e-23	0.266561	0.298	0.138	1.84193e-19	2	ptenb
glud1b	1.80053e-23	0.180414	0.092	0.019	3.01931e-19	2	glud1b
mcl1a	2.56585e-23	0.704011	0.489	0.297	4.30268e-19	2	mcl1a
selenop	4.97688e-23	0.629721	0.641	0.492	8.34573e-19	2	selenop
phc2b	6.59801e-23	0.207921	0.176	0.059	1.10642e-18	2	phc2b
pxna	6.6886e-23	0.140636	0.095	0.02	1.12161e-18	2	pxna
jdp2b	9.03972e-23	0.71044	0.7	0.462	1.51587e-18	2	jdp2b
fetub	9.37413e-23	0.707861	0.053	0.006	1.57195e-18	2	fetub
hmgn3	2.27194e-22	0.126038	0.128	0.034	3.80981e-18	2	hmgn3
zgc:153317	2.32631e-22	0.435626	0.065	0.01	3.90099e-18	2	zgc:153317
ndrg1a	2.6175e-22	0.233677	0.092	0.019	4.38928e-18	2	ndrg1a
slc16a9a	3.47219e-22	0.196732	0.059	0.008	5.82252e-18	2	slc16a9a
pdgfab	3.55429e-22	0.129509	0.147	0.044	5.96019e-18	2	pdgfab
pim1	4.12309e-22	0.449452	0.363	0.188	6.91401e-18	2	pim1
LO018188.1	4.73747e-22	0.133895	0.128	0.035	7.94426e-18	2	LO018188.1
ccl25b	6.54299e-22	0.518426	0.328	0.163	1.09719e-17	2	ccl25b
msrb1a	1.08319e-21	0.122154	0.057	0.008	1.8164e-17	2	msrb1a
cox5aa1	1.21882e-21	0.315335	0.183	0.065	2.04384e-17	2	cox5aa
ppiab1	1.62839e-21	0.403865	0.595	0.439	2.73065e-17	2	ppiab
uqcrc2a	1.64126e-21	0.105972	0.082	0.016	2.75223e-17	2	uqcrc2a
si:ch211-198c19.3	2.44615e-21	0.414371	0.263	0.119	4.10194e-17	2	si:ch211-198c19.3
serpine1	3.08934e-21	0.164494	0.071	0.012	5.18052e-17	2	serpine1
cldnd1	3.64318e-21	0.692342	0.181	0.066	6.10924e-17	2	cldnd
cldn7b	6.46956e-21	0.11101	0.069	0.012	1.08488e-16	2	cldn7b
afap1l2	7.35083e-21	0.155497	0.189	0.069	1.23266e-16	2	afap1l2
rbm47	9.13791e-21	0.144391	0.076	0.014	1.53234e-16	2	rbm47
cyb5a	2.74023e-20	0.119411	0.103	0.025	4.59509e-16	2	cyb5a
slc3a2a	3.04991e-20	0.226057	0.055	0.008	5.11439e-16	2	slc3a2a
lmo4a	4.39863e-20	0.108232	0.126	0.036	7.37607e-16	2	lmo4a
phlda2	7.63224e-20	0.500329	0.092	0.021	1.27985e-15	2	phlda2
sh3bgrl3	8.02712e-20	0.15833	0.162	0.055	1.34607e-15	2	sh3bgrl3
gstt1a	1.14059e-19	0.604094	0.092	0.022	1.91265e-15	2	gstt1a
apoeb	1.25065e-19	0.81051	0.057	0.009	2.09722e-15	2	apoeb
slc20a1b	1.26392e-19	0.185558	0.092	0.022	2.11947e-15	2	slc20a1b
eps8a	2.03937e-19	0.108423	0.126	0.037	3.41982e-15	2	eps8a
sod1	3.21716e-19	0.352299	0.206	0.084	5.39486e-15	2	sod1
fam107b	3.37779e-19	0.117211	0.147	0.047	5.66421e-15	2	fam107b
atp5mc1	3.86744e-19	0.221645	0.113	0.031	6.48531e-15	2	atp5mc1
sqstm1	5.97709e-19	0.213631	0.16	0.056	1.0023e-14	2	sqstm1
tpi1b	6.46853e-19	0.23623	0.128	0.039	1.08471e-14	2	tpi1b
id2a	7.97805e-19	0.342575	0.193	0.077	1.33784e-14	2	id2a
thy1	9.4064e-19	0.431432	0.086	0.02	1.57736e-14	2	thy1
cdh1	1.20058e-18	0.111099	0.076	0.015	2.01325e-14	2	cdh1
suclg1	2.31226e-18	0.242208	0.113	0.033	3.87743e-14	2	suclg1
selenou1a	3.75009e-18	0.10269	0.097	0.025	6.28853e-14	2	selenou1a
rtn1a	5.14541e-18	0.167374	0.195	0.08	8.62833e-14	2	rtn1a
zgc:173856	5.29729e-18	0.281541	0.084	0.02	8.88302e-14	2	zgc:173856
inhbb	5.98876e-18	0.133352	0.099	0.026	1.00425e-13	2	inhbb
fosab1	1.38227e-17	0.489847	0.952	0.901	2.31794e-13	2	fosab
mt-co1	2.0517e-17	0.323611	0.954	0.851	3.4405e-13	2	mt-co1
parvab	3.23391e-17	0.163621	0.25	0.117	5.42294e-13	2	parvab
cyp1c2	3.76943e-17	0.16525	0.088	0.022	6.32096e-13	2	cyp1c2
sult6b1	5.4638e-17	0.162301	0.164	0.062	9.16225e-13	2	sult6b1
mprip1	6.07827e-17	0.132332	0.145	0.051	1.01926e-12	2	mprip
lamb1b	9.52151e-17	0.261276	0.309	0.172	1.59666e-12	2	lamb1b
slc7a2	1.00083e-16	0.10193	0.12	0.038	1.67829e-12	2	slc7a2
capgb	1.14169e-16	0.135534	0.059	0.011	1.9145e-12	2	capgb
zp2.5	1.46073e-16	0.403866	0.095	0.026	2.44949e-12	2	zp2.5
ckbb	1.73805e-16	0.207964	0.076	0.017	2.91453e-12	2	ckbb
zfhx3	1.88429e-16	0.146921	0.158	0.059	3.15977e-12	2	zfhx3
dhrs11b	2.21465e-16	0.153465	0.099	0.028	3.71375e-12	2	dhrs11b
calm1b	2.35156e-16	0.110329	0.137	0.048	3.94333e-12	2	calm1b
gchfr	2.74284e-16	0.132518	0.143	0.052	4.59947e-12	2	gchfr
neurl1b	2.79427e-16	0.104469	0.105	0.031	4.68571e-12	2	neurl1b
ctsz	3.7469e-16	0.181381	0.065	0.013	6.28318e-12	2	ctsz
slc12a2	4.36356e-16	0.158139	0.147	0.055	7.31726e-12	2	slc12a2
sdha	4.55195e-16	0.104852	0.084	0.021	7.63317e-12	2	sdha
h3f3b.1.2	4.96596e-16	0.171584	0.168	0.066	8.32742e-12	2	h3f3b.1.2
msra	5.05565e-16	0.115929	0.074	0.017	8.47782e-12	2	msra
pgk1	7.11614e-16	0.158911	0.124	0.042	1.1933e-11	2	pgk1
cth	7.17942e-16	0.158041	0.067	0.015	1.20392e-11	2	cth
si:dkey-241l7.2	7.71489e-16	0.56575	0.071	0.016	1.29371e-11	2	si:dkey-241l7.2
kyat1	1.44103e-15	0.123628	0.063	0.013	2.41647e-11	2	kyat1
zgc:101744	1.55128e-15	0.119737	0.065	0.014	2.60134e-11	2	zgc:101744
tuba8l2	1.55582e-15	0.220636	0.164	0.069	2.60895e-11	2	tuba8l2
zgc:172121	1.57213e-15	0.132491	0.059	0.012	2.63631e-11	2	zgc:172121
dclk1a	1.82455e-15	0.178505	0.214	0.098	3.05959e-11	2	dclk1a
tspan35	2.16584e-15	0.168348	0.08	0.02	3.6319e-11	2	tspan35
sema6d	2.79802e-15	0.149425	0.16	0.064	4.692e-11	2	sema6d
gamt	2.85475e-15	1.06418	0.122	0.043	4.78712e-11	2	gamt
si:dkey-112a7.4	3.47799e-15	0.173089	0.101	0.031	5.83224e-11	2	si:dkey-112a7.4
CABZ01068358.1	9.89218e-15	0.20403	0.166	0.069	1.65882e-10	2	CABZ01068358.1
ddt	1.01705e-14	0.105811	0.078	0.02	1.70549e-10	2	ddt
ehbp1l1a	1.17948e-14	0.110048	0.132	0.049	1.97788e-10	2	ehbp1l1a
slc22a2	1.21701e-14	0.550922	0.069	0.017	2.04081e-10	2	slc22a2
pnrc2	1.99388e-14	0.354354	0.664	0.541	3.34353e-10	2	pnrc2
mid1ip1l	2.08219e-14	0.160563	0.067	0.016	3.49163e-10	2	mid1ip1l
atp1b1a	2.76395e-14	1.07399	0.168	0.073	4.63487e-10	2	atp1b1a
higd1a	2.91387e-14	0.340061	0.284	0.16	4.88627e-10	2	higd1a
chmp5b	5.76761e-14	0.121257	0.132	0.049	9.67171e-10	2	chmp5b
actn11	5.77434e-14	0.167371	0.223	0.109	9.68298e-10	2	actn1
mgst3a	5.81881e-14	0.217438	0.132	0.05	9.75756e-10	2	mgst3a
irf2bp2b	7.06942e-14	0.254984	0.206	0.101	1.18547e-09	2	irf2bp2b
mdh1aa1	7.08293e-14	0.589964	0.193	0.094	1.18774e-09	2	mdh1aa
ptgr1	1.47936e-13	0.119624	0.069	0.018	2.48074e-09	2	ptgr1
selenot1a	1.90456e-13	0.146208	0.082	0.024	3.19376e-09	2	selenot1a
csrnp1b	3.40413e-13	0.149573	0.164	0.071	5.70838e-09	2	csrnp1b
zp3	4.44962e-13	0.32124	0.078	0.022	7.46158e-09	2	zp3
cyc1	4.62174e-13	0.12221	0.099	0.033	7.7502e-09	2	cyc1
myh9a	5.37268e-13	0.130776	0.053	0.011	9.00945e-09	2	myh9a
chka	5.60706e-13	0.126652	0.069	0.018	9.40247e-09	2	chka
si:dkey-37o8.1	1.16355e-12	0.244125	0.078	0.023	1.95115e-08	2	si:dkey-37o8.1
uqcr10	1.61657e-12	0.127192	0.084	0.026	2.71082e-08	2	uqcr10
chp1	2.31309e-12	0.162418	0.124	0.049	3.87882e-08	2	chp1
pax2a	2.68276e-12	0.117893	0.059	0.014	4.49873e-08	2	pax2a
si:ch73-335l21.4	2.70133e-12	0.620063	0.487	0.33	4.52987e-08	2	si:ch73-335l21.4
emc2	2.77976e-12	0.107679	0.101	0.035	4.66138e-08	2	emc2
eno31	2.78199e-12	0.44855	0.181	0.09	4.66512e-08	2	eno3
sh2d3cb	2.7859e-12	0.101002	0.132	0.054	4.67168e-08	2	sh2d3cb
klf12a	3.14244e-12	0.102584	0.118	0.045	5.26956e-08	2	klf12a
zgc:66433	4.29072e-12	0.137369	0.107	0.039	7.1951e-08	2	zgc:66433
fahd1	6.2583e-12	0.100385	0.069	0.02	1.04945e-07	2	fahd1
CABZ01061591.1	6.60239e-12	0.11218	0.149	0.066	1.10716e-07	2	CABZ01061591.1
f11r.1	7.48585e-12	0.153124	0.105	0.038	1.2553e-07	2	f11r.1
rhoca	8.10371e-12	0.125953	0.137	0.057	1.35891e-07	2	rhoca
zar1	8.50944e-12	0.215587	0.053	0.012	1.42695e-07	2	zar1
lims1	9.60818e-12	0.211164	0.25	0.145	1.6112e-07	2	lims1
klf3	1.09996e-11	0.115979	0.155	0.07	1.84452e-07	2	klf3
gpx4a	1.14554e-11	0.384974	0.179	0.088	1.92095e-07	2	gpx4a
cldng	1.32783e-11	0.272693	0.067	0.019	2.22664e-07	2	cldng
cox7c	1.38193e-11	0.196013	0.139	0.06	2.31736e-07	2	cox7c
si:ch1073-406l10.2	1.88157e-11	0.114802	0.059	0.015	3.1552e-07	2	si:ch1073-406l10.2
ucp2	1.94313e-11	0.105947	0.069	0.02	3.25843e-07	2	ucp2
slc25a3b1	2.15832e-11	0.325574	0.282	0.173	3.61928e-07	2	slc25a3b
spry2	2.20276e-11	0.311826	0.21	0.112	3.69382e-07	2	spry2
pde4ba	2.45238e-11	0.133103	0.097	0.034	4.11239e-07	2	pde4ba
aldh7a1	3.18296e-11	0.101598	0.074	0.022	5.33751e-07	2	aldh7a1
nfil3-6	3.30551e-11	0.194921	0.09	0.031	5.543e-07	2	nfil3-6
ip6k2b	3.77472e-11	0.172271	0.174	0.084	6.32983e-07	2	ip6k2b
si:dkey-90l23.1	4.88704e-11	0.176705	0.057	0.015	8.19508e-07	2	si:dkey-90l23.1
zp3.2.1	1.29341e-10	0.29492	0.086	0.03	2.16893e-06	2	zp3.2.1
jund	1.32934e-10	0.368974	0.366	0.256	2.22917e-06	2	jund
socs3a	1.45734e-10	0.298809	0.851	0.706	2.44381e-06	2	socs3a
spry4	1.57648e-10	0.155427	0.197	0.103	2.6436e-06	2	spry4
sept7b	2.61164e-10	0.103947	0.092	0.034	4.37945e-06	2	sept7b
gnai2a	3.37746e-10	0.12744	0.101	0.039	5.66365e-06	2	gnai2a
mat1a	4.39423e-10	0.252129	0.086	0.032	7.36868e-06	2	mat1a
cyp3c1	6.59154e-10	0.208819	0.267	0.17	1.10533e-05	2	cyp3c1
mt-cyb	7.51207e-10	0.251677	0.884	0.734	1.2597e-05	2	mt-cyb
mcl1b1	8.59689e-10	0.433459	0.368	0.269	1.44161e-05	2	mcl1b
eif4ebp2	1.36161e-09	0.122905	0.147	0.07	2.28328e-05	2	eif4ebp2
zgc:110339	1.48075e-09	0.24529	0.109	0.047	2.48307e-05	2	zgc:110339
adh8b	1.4841e-09	0.259517	0.153	0.078	2.48868e-05	2	adh8b
btg21	2.03843e-09	0.351078	0.901	0.806	3.41825e-05	2	btg2
cox6b11	3.14864e-09	0.100137	0.097	0.039	5.27995e-05	2	cox6b1
si:dkey-229d11.3	3.33626e-09	0.222623	0.074	0.026	5.59458e-05	2	si:dkey-229d11.3
acadm	3.83801e-09	0.197394	0.145	0.072	6.43596e-05	2	acadm
rhocb	4.10511e-09	0.128976	0.109	0.048	6.88385e-05	2	rhocb
sept7a	4.31005e-09	0.150664	0.145	0.071	7.22752e-05	2	sept7a
tln1	5.19217e-09	0.193777	0.258	0.163	8.70675e-05	2	tln1
etnk1	5.21468e-09	0.103631	0.097	0.039	8.7445e-05	2	etnk1
pbxip1b1	5.45788e-09	0.120537	0.16	0.082	9.15233e-05	2	pbxip1b
zgc:162730	5.8941e-09	0.197032	0.84	0.632	9.88381e-05	2	zgc:162730
ddx5	6.9718e-09	0.24043	0.187	0.105	0.00011691	2	ddx5
gstz1	7.41475e-09	0.127366	0.086	0.034	0.000124338	2	gstz1
ppt1	7.94514e-09	0.140008	0.164	0.086	0.000133232	2	ppt1
glud1a	8.5772e-09	0.137568	0.141	0.069	0.000143831	2	glud1a
si:ch73-160p18.3	8.62489e-09	0.359143	0.143	0.072	0.000144631	2	si:ch73-160p18.3
cox8b1	9.43162e-09	0.191876	0.109	0.05	0.000158159	2	cox8b
tpm4b1	9.44905e-09	0.228559	0.191	0.11	0.000158451	2	tpm4b
cox7a2a	9.4714e-09	0.105581	0.095	0.039	0.000158826	2	cox7a2a
egr2b	9.78861e-09	0.158462	0.055	0.016	0.000164145	2	egr2b
atp5mf	1.14293e-08	0.142565	0.139	0.068	0.000191657	2	atp5mf
grk4	1.32892e-08	0.131373	0.197	0.114	0.000222847	2	grk4
uqcrfs1	1.56468e-08	0.121799	0.12	0.056	0.000262382	2	uqcrfs1
atp5mc3b1	1.75107e-08	0.527978	0.359	0.275	0.000293638	2	atp5mc3b
egr2a	2.30188e-08	0.225997	0.099	0.043	0.000386003	2	egr2a
h1m1	2.38547e-08	0.313794	0.078	0.03	0.00040002	2	h1m
s100w	2.48422e-08	0.125523	0.061	0.02	0.000416578	2	s100w
hgd	2.64188e-08	0.181235	0.059	0.02	0.000443016	2	hgd
cth1	2.88298e-08	0.164853	0.057	0.018	0.000483447	2	cth1
nit2	3.90854e-08	0.166387	0.097	0.043	0.000655424	2	nit2
cox5ab	4.97025e-08	0.116469	0.105	0.048	0.000833461	2	cox5ab
cycsb	5.52828e-08	0.100172	0.09	0.038	0.000927038	2	cycsb
aldh6a1	6.30737e-08	0.266448	0.137	0.071	0.00105768	2	aldh6a1
btg4	6.725e-08	0.223366	0.086	0.036	0.00112771	2	btg4
adh8a	7.65709e-08	0.339527	0.097	0.042	0.00128402	2	adh8a
spink2.1	9.6206e-08	0.125762	0.076	0.03	0.00161328	2	spink2.1
si:dkey-19b23.11	9.76827e-08	0.194803	0.067	0.025	0.00163804	2	si:dkey-19b23.11
dusp21	1.25085e-07	0.441261	0.288	0.206	0.00209755	2	dusp2
psap	1.26469e-07	0.103825	0.092	0.04	0.00212075	2	psap
mpc1	1.39404e-07	0.142177	0.128	0.066	0.00233767	2	mpc1
adka	1.39766e-07	0.109863	0.107	0.051	0.00234373	2	adka
org	1.53802e-07	0.229271	0.063	0.023	0.0025791	2	org
pycard	1.75424e-07	0.111299	0.063	0.023	0.00294169	2	pycard
atp5md	2.00988e-07	0.1206	0.109	0.052	0.00337036	2	atp5md
zgc:162396	2.23876e-07	0.108429	0.09	0.04	0.00375418	2	zgc:162396
acp5a	2.29717e-07	0.223726	0.071	0.029	0.00385212	2	acp5a
kpna7	2.34381e-07	0.135521	0.055	0.019	0.00393034	2	kpna7
daam1a1	2.39157e-07	0.106792	0.16	0.089	0.00401042	2	daam1a
lsm14b	2.40885e-07	0.147792	0.057	0.02	0.0040394	2	lsm14b
tspan3a	2.91804e-07	0.127768	0.181	0.105	0.00489326	2	tspan3a
cyp1d1	3.42373e-07	0.10397	0.116	0.058	0.00574126	2	cyp1d1
cox7b1	3.49435e-07	0.197642	0.172	0.1	0.00585968	2	cox7b
crfb4	3.56394e-07	0.106056	0.151	0.085	0.00597637	2	crfb4
zgc:158343	4.52892e-07	0.408849	0.237	0.155	0.00759454	2	zgc:158343
gyg1a1	5.28556e-07	0.205811	0.086	0.038	0.00886336	2	gyg1a
cox7a11	5.32197e-07	0.188465	0.116	0.059	0.0089244	2	cox7a1
cyp2ad3	7.97694e-07	0.19332	0.288	0.208	0.0133765	2	cyp2ad3
atp5f1c1	8.20177e-07	0.136478	0.17	0.1	0.0137536	2	atp5f1c
tuba8l3	8.75326e-07	0.121261	0.206	0.13	0.0146783	2	tuba8l3
rasgef1ba	8.83763e-07	0.186038	0.233	0.157	0.0148198	2	rasgef1ba
2020-09-02	1.33065e-06	0.241986	0.214	0.147	0.0223137	2	2020-09-02
CABZ01068367.1	1.35416e-06	0.134179	0.181	0.112	0.0227079	2	CABZ01068367.1
zgc:77439	1.36507e-06	0.242721	0.084	0.039	0.0228908	2	zgc:77439
mid1ip1b	1.55682e-06	0.196288	0.057	0.022	0.0261063	2	mid1ip1b
gstp1	1.84994e-06	0.310385	0.147	0.085	0.0310217	2	gstp1
susd6	1.87095e-06	0.105381	0.162	0.096	0.031374	2	susd6
uqcrq	2.39737e-06	0.147247	0.145	0.084	0.0402014	2	uqcrq
pfn2	2.72147e-06	0.319267	0.267	0.189	0.0456363	2	pfn2
cfl11	2.96477e-06	0.238448	0.405	0.329	0.0497162	2	cfl1
tuba8l4	3.04908e-06	0.216215	0.246	0.166	0.05113	2	tuba8l4
itgb4	3.14543e-06	0.167171	0.061	0.025	0.0527458	2	itgb4
zgc:171977	3.26191e-06	0.174357	0.055	0.021	0.054699	2	zgc:171977
gstk1	3.36623e-06	0.109128	0.195	0.124	0.0564483	2	gstk1
srgn	3.39561e-06	0.614312	0.065	0.028	0.0569411	2	srgn
id3	3.94959e-06	0.146831	0.105	0.054	0.0662307	2	id3
junba1	4.33041e-06	0.304671	0.929	0.879	0.0726166	2	junba
ctss2.1	5.18423e-06	0.186159	0.08	0.037	0.0869343	2	ctss2.1
2020-06-01	7.11012e-06	0.31624	0.926	0.893	0.11923	2	jun
marcksl1b1	7.93489e-06	0.41525	0.462	0.426	0.13306	2	marcksl1b
si:ch211-286b5.5	7.97307e-06	0.116613	0.164	0.1	0.1337	2	si:ch211-286b5.5
cox7a2l	8.29945e-06	0.115395	0.107	0.057	0.139174	2	cox7a2l
COX5B1	9.0275e-06	0.17187	0.197	0.129	0.151382	2	COX5B
cox8a	9.36031e-06	0.139298	0.193	0.126	0.156963	2	cox8a
nfe2l2a	1.04465e-05	0.115951	0.164	0.1	0.175177	2	nfe2l2a
zgc:152652	1.13863e-05	0.338639	0.097	0.051	0.190936	2	zgc:152652
ier5l	1.27323e-05	0.160841	0.202	0.131	0.213507	2	ier5l
atp5f1b1	1.27635e-05	0.260721	0.223	0.155	0.214032	2	atp5f1b
tob1a	1.32036e-05	0.156804	0.162	0.101	0.221411	2	tob1a
atp5pd	1.66133e-05	0.149651	0.187	0.123	0.278588	2	atp5pd
pmp22b	1.73062e-05	0.221144	0.172	0.111	0.290207	2	pmp22b
lamp2	2.02265e-05	0.173827	0.057	0.024	0.339178	2	lamp2
CR792441.1	2.09996e-05	0.167115	0.061	0.027	0.352142	2	CR792441.1
atp5if1b	2.15053e-05	0.139166	0.164	0.103	0.360622	2	atp5if1b
zp3.2	2.55901e-05	0.286823	0.057	0.024	0.42912	2	zp3.2
znf395b	2.80717e-05	0.114074	0.158	0.099	0.470735	2	znf395b
si:dkey-112e7.2	3.00898e-05	0.122505	0.212	0.143	0.504576	2	si:dkey-112e7.2
aqp3a	3.05259e-05	0.206015	0.063	0.029	0.511889	2	aqp3a
sat1a.2	3.73089e-05	0.275079	0.292	0.215	0.625633	2	sat1a.2
si:ch211-146l10.8	5.47322e-05	0.156236	0.057	0.025	0.917804	2	si:ch211-146l10.8
gstr	5.85261e-05	0.421668	0.277	0.226	0.981425	2	gstr
2020-09-10	6.60631e-05	0.175903	0.248	0.185	1	2	2020-09-10
ccnb1	6.98081e-05	0.134466	0.057	0.026	1	2	ccnb1
dhrs3a	7.32766e-05	0.121519	0.17	0.113	1	2	dhrs3a
idh21	7.47498e-05	0.178744	0.176	0.118	1	2	idh2
CABZ01059627.3	8.04459e-05	0.10195	0.055	0.024	1	2	CABZ01059627.3
inhbaa	9.44271e-05	0.116467	0.092	0.051	1	2	inhbaa
junbb	0.000126128	0.269562	0.345	0.295	1	2	junbb
hmgb2a	0.000136131	0.106413	0.16	0.103	1	2	hmgb2a
sertad4	0.000157264	0.125925	0.21	0.152	1	2	sertad4
ahcy	0.000168584	0.645573	0.164	0.117	1	2	ahcy
krt18a.1	0.000230084	0.195803	0.366	0.303	1	2	krt18a.1
dhrs1	0.000250183	0.130221	0.225	0.169	1	2	dhrs1
atp5if1a	0.000261678	0.134088	0.103	0.061	1	2	atp5if1a
acvrl1	0.000287019	0.114673	0.225	0.168	1	2	acvrl1
ctsba	0.000300012	0.103237	0.099	0.057	1	2	ctsba
tnrc6c1	0.000301337	0.157179	0.229	0.172	1	2	tnrc6c1
ier2a1	0.000318668	0.302823	0.429	0.377	1	2	ier2a
si:dkeyp-50f7.2	0.000376067	0.229545	0.063	0.032	1	2	si:dkeyp-50f7.2
cirbpa	0.000398569	0.18111	0.237	0.174	1	2	cirbpa
slc25a25a	0.00041682	0.102265	0.061	0.031	1	2	slc25a25a
chac1	0.000478571	0.129227	0.149	0.098	1	2	chac1
bzw1b	0.000485041	0.12373	0.099	0.059	1	2	bzw1b
ier51	0.000493316	0.1948	0.389	0.326	1	2	ier5
prss23	0.000497842	0.107154	0.212	0.156	1	2	prss23
actb11	0.000554377	0.14023	0.754	0.602	1	2	actb1
khdrbs1a	0.000596209	0.150118	0.229	0.167	1	2	khdrbs1a
nfkbiaa	0.000626462	0.103166	0.099	0.059	1	2	nfkbiaa
tns1b	0.000652434	0.124006	0.206	0.158	1	2	tns1b
atp5fa11	0.000655024	0.167757	0.162	0.113	1	2	atp5fa1
gtf2a1	0.000682472	0.101317	0.055	0.027	1	2	gtf2a1
sdc41	0.000793793	0.162071	0.653	0.544	1	2	sdc4
si:ch211-146l10.7	0.00088156	0.135104	0.055	0.028	1	2	si:ch211-146l10.7
scp2a	0.000903314	0.152952	0.084	0.05	1	2	scp2a
cox6c1	0.000912988	0.108561	0.137	0.092	1	2	cox6c
ankrd12	0.000994783	0.102506	0.193	0.144	1	2	ankrd12
cox6a2	0.00104393	0.15531	0.09	0.055	1	2	cox6a2
zgc:1538671	0.00111158	0.257783	0.525	0.49	1	2	zgc:153867
aoc2	0.00143772	0.332063	0.158	0.115	1	2	aoc2
ptmab	0.00154793	0.113417	0.319	0.258	1	2	ptmab
si:ch1073-263o8.2	0.00162886	0.105639	0.057	0.03	1	2	si:ch1073-263o8.2
atp5l1	0.00169438	0.218993	0.208	0.163	1	2	atp5l
xbp11	0.00174296	0.173842	0.336	0.279	1	2	xbp1
ddx6	0.0021754	0.105096	0.099	0.063	1	2	ddx6
slc9a3r1a	0.0024064	0.101795	0.099	0.065	1	2	slc9a3r1a
angptl4	0.002438	0.213093	0.099	0.064	1	2	angptl4
pfn11	0.00262135	0.814873	0.183	0.144	1	2	pfn1
gadd45ba	0.00312528	0.101369	0.628	0.502	1	2	gadd45ba
h3f3b.1.1	0.00322418	0.161575	0.305	0.259	1	2	h3f3b.1.1
si:dkey-229d11.5	0.00395281	0.135961	0.059	0.034	1	2	si:dkey-229d11.5
mdka1	0.00457602	0.141466	0.317	0.267	1	2	mdka
ehd2b	0.00477453	0.106885	0.21	0.166	1	2	ehd2b
krt911	0.00500882	0.358562	0.256	0.333	1	2	krt91
acy1.1	0.00568056	0.100635	0.071	0.045	1	2	acy1.1
hspa8	0.00658835	0.159415	0.397	0.34	1	2	hspa8
hnrnpa0l.1	0.00832677	0.209654	0.282	0.241	1	2	hnrnpa0l.1
atp5pf	0.00869689	0.124809	0.174	0.134	1	2	atp5pf

## Sheet: Progenitor (SC3)
	p_val	avg_logFC	pct.1	pct.2	p_val_adj	cluster	gene
igfbp5b	0	3.07665	0.705	0.044	0	3	igfbp5b
spon2b	0	1.79833	0.311	0.002	0	3	spon2b
CABZ01092746.11	0	1.66083	0.872	0.102	0	3	CABZ01092746.1
pcolcea	0	1.4811	0.725	0.049	0	3	pcolcea
osr1	0	1.07596	0.646	0.034	0	3	osr1
htra1a	0	0.890244	0.482	0.011	0	3	htra1a
crabp2a	0	0.782346	0.354	0.003	0	3	crabp2a
neu3.5	0	0.687492	0.387	0.002	0	3	neu3.5
scara3	0	0.653871	0.505	0.02	0	3	scara3
thbs3a	0	0.640994	0.403	0.001	0	3	thbs3a
fgl2b	0	0.562485	0.341	0.004	0	3	fgl2b
slit3	2.48438e-306	0.947706	0.626	0.048	4.16605e-302	3	slit3
endouc	4.50539e-302	1.80367	0.672	0.059	7.55509e-298	3	endouc
plpp3	2.45902e-300	1.19975	0.728	0.076	4.12353e-296	3	plpp3
neu3.4	4.18393e-292	0.66561	0.259	0	7.01603e-288	3	neu3.4
si:ch211-227m13.1	7.62989e-280	0.350245	0.279	0.002	1.27946e-275	3	si:ch211-227m13.1
dpt	4.77548e-264	0.843287	0.436	0.021	8.008e-260	3	dpt
si:ch211-67e16.11	8.42755e-264	0.633309	0.259	0.002	1.41322e-259	3	si:ch211-67e16.11
itih5	1.52671e-261	0.3617	0.246	0.001	2.56013e-257	3	itih5
wnt9a	7.48224e-258	0.292255	0.239	0.001	1.2547e-253	3	wnt9a
gpc6a	1.29354e-254	0.328335	0.272	0.003	2.16913e-250	3	gpc6a
twist1b	2.54597e-254	0.460281	0.338	0.01	4.26934e-250	3	twist1b
vcanb	1.65813e-249	0.358457	0.289	0.005	2.78052e-245	3	vcanb
htra1b	1.76584e-246	0.809858	0.285	0.005	2.96114e-242	3	htra1b
rbp4	4.00579e-239	2.4112	0.875	0.178	6.71732e-235	3	rbp4
fn1a	8.65431e-236	0.697113	0.446	0.027	1.45124e-231	3	fn1a
si:dkey-261h17.1	6.16421e-231	0.69466	0.439	0.027	1.03368e-226	3	si:dkey-261h17.1	cd34
ca10b	5.87946e-223	0.313926	0.239	0.003	9.85927e-219	3	ca10b
prrx1a	4.44058e-219	0.464518	0.338	0.014	7.44641e-215	3	prrx1a
ifitm11	4.2971e-208	1.90174	0.452	0.035	7.20581e-204	3	ifitm1
dio2	7.0186e-206	0.418813	0.275	0.008	1.17695e-201	3	dio2
vim	3.64307e-205	0.853721	0.639	0.082	6.10906e-201	3	vim
mfge8b	1.61769e-204	0.926292	0.292	0.01	2.7127e-200	3	mfge8b
nova2	9.28897e-203	0.526924	0.416	0.029	1.55767e-198	3	nova2
crabp1b	1.73138e-192	0.361275	0.256	0.007	2.90335e-188	3	crabp1b
crhbp	2.51243e-192	0.71209	0.197	0.002	4.21309e-188	3	crhbp
slit2	5.21966e-192	0.322473	0.223	0.004	8.75284e-188	3	slit2
nptx1l	2.68261e-186	0.358274	0.197	0.002	4.49846e-182	3	nptx1l
hapln3	7.0609e-185	0.409592	0.246	0.007	1.18404e-180	3	hapln3
emilin2a	1.40815e-182	0.197433	0.177	0.001	2.36132e-178	3	emilin2a
fbln2	4.00979e-182	0.384399	0.305	0.015	6.72402e-178	3	fbln2
cpz	5.54649e-178	0.251891	0.223	0.005	9.3009e-174	3	cpz
plvapb	4.80926e-174	0.555739	0.2	0.003	8.06464e-170	3	plvapb
sostdc1a	4.91977e-168	1.01095	0.213	0.005	8.24997e-164	3	sostdc1a
asip2b	1.58797e-163	1.116	0.308	0.018	2.66287e-159	3	asip2b
ackr3b	2.08551e-163	0.635982	0.305	0.018	3.4972e-159	3	ackr3b
gata2a	1.2621e-160	0.326002	0.279	0.014	2.11641e-156	3	gata2a
mgp	2.26462e-159	0.512048	0.223	0.007	3.79754e-155	3	mgp
cdh6	3.77838e-158	0.346791	0.282	0.015	6.33596e-154	3	cdh6
icn	2.72764e-157	0.960584	0.698	0.126	4.57398e-153	3	icn
cbln2b	2.01559e-155	0.285467	0.138	0	3.37995e-151	3	cbln2b
si:ch211-105c13.3	3.18138e-155	1.11693	0.649	0.125	5.33486e-151	3	si:ch211-105c13.3
tspan351	3.19737e-151	0.271433	0.256	0.012	5.36167e-147	3	tspan35
tcf21	6.43907e-150	0.41962	0.262	0.013	1.07977e-145	3	tcf21
cx43	1.1069e-141	0.745275	0.239	0.011	1.85617e-137	3	cx43
aqp3a1	1.56079e-140	1.34415	0.275	0.017	2.61729e-136	3	aqp3a
fstb	4.55162e-140	0.782181	0.407	0.046	7.63261e-136	3	fstb
sost1	1.00931e-138	0.668892	0.4	0.043	1.69251e-134	3	sost
tsku	1.07033e-135	0.506123	0.452	0.061	1.79484e-131	3	tsku
vmo1a	2.9502e-132	0.513676	0.348	0.034	4.9472e-128	3	vmo1a
si:ch211-251b21.1	4.8175e-131	0.223838	0.154	0.003	8.07846e-127	3	si:ch211-251b21.1
gpr78a	9.0874e-128	0.269296	0.223	0.011	1.52387e-123	3	gpr78a
CR383676.11	1.49422e-127	0.727683	0.997	0.99	2.50566e-123	3	CR383676.1
adrb3a	4.52837e-126	0.209805	0.167	0.005	7.59362e-122	3	adrb3a
s100w1	1.59478e-121	0.386806	0.223	0.012	2.67428e-117	3	s100w
crabp2b	1.51858e-120	0.155128	0.128	0.002	2.54651e-116	3	crabp2b
galr1b	6.14103e-120	0.169992	0.125	0.001	1.02979e-115	3	galr1b
wnt7bb	7.00811e-120	0.216608	0.148	0.003	1.17519e-115	3	wnt7bb
c1qtnf2	2.34021e-117	0.345818	0.348	0.039	3.9243e-113	3	c1qtnf2
BX663503.3	4.01368e-116	0.358871	0.341	0.037	6.73054e-112	3	BX663503.3
adgrg6	3.54204e-110	0.160714	0.128	0.002	5.93965e-106	3	adgrg6
id2b	6.04996e-108	1.21044	0.351	0.044	1.01452e-103	3	id2b
FP102783.1	1.84418e-107	0.179319	0.151	0.005	3.0925e-103	3	FP102783.1
tril1	5.02346e-105	0.483869	0.364	0.05	8.42383e-101	3	tril
myoc	3.15199e-104	0.480708	0.151	0.005	5.28557e-100	3	myoc
col1a2	6.76133e-104	1.37322	0.882	0.449	1.13381e-99	3	col1a2
emp2	3.52444e-103	0.80985	0.679	0.204	5.91014e-99	3	emp2
dub	1.69643e-102	0.306546	0.203	0.013	2.84475e-98	3	dub
fpr1	6.53561e-102	0.159568	0.125	0.003	1.09596e-97	3	fpr1
mfap5	1.0607e-97	0.988776	0.748	0.28	1.77869e-93	3	mfap5
alkal2b	7.51474e-96	0.361768	0.161	0.007	1.26015e-91	3	alkal2b
sema3d	3.04034e-95	0.281172	0.21	0.016	5.09834e-91	3	sema3d
rgcc	2.37961e-94	0.550485	0.223	0.018	3.99037e-90	3	rgcc
sfrp1b	2.70315e-93	0.453958	0.249	0.024	4.53292e-89	3	sfrp1b
hapln1b	6.47047e-93	0.175396	0.144	0.006	1.08503e-88	3	hapln1b
si:ch211-160j14.3	1.12283e-92	0.193403	0.105	0.002	1.88287e-88	3	si:ch211-160j14.3
vasna1	1.69485e-92	0.381093	0.341	0.049	2.84209e-88	3	vasna
lgals2a1	3.82423e-92	0.595981	0.338	0.048	6.41285e-88	3	lgals2a
tmsb1	7.5522e-90	0.48213	0.38	0.057	1.26643e-85	3	tmsb1
ccl25b1	8.10789e-90	1.45276	0.577	0.154	1.35961e-85	3	ccl25b
fam107b1	4.28554e-88	0.511219	0.305	0.041	7.18641e-84	3	fam107b
srgn1	5.65625e-86	0.699707	0.22	0.02	9.48497e-82	3	srgn
cebpa	2.18384e-85	0.526876	0.387	0.069	3.66209e-81	3	cebpa
hsd17b1	1.26099e-82	0.287895	0.089	0.001	2.11455e-78	3	hsd17b1
rem11	2.14184e-82	0.403179	0.279	0.036	3.59165e-78	3	rem1
col1a1b	2.55541e-82	1.17719	0.895	0.65	4.28517e-78	3	col1a1b
rspo3	2.95913e-82	0.299721	0.197	0.016	4.96217e-78	3	rspo3
lmx1bb	7.70676e-82	0.144207	0.121	0.004	1.29235e-77	3	lmx1bb
clic2	1.04168e-80	0.945333	0.315	0.049	1.74679e-76	3	clic2
im:7151449	2.97129e-80	0.339658	0.239	0.027	4.98255e-76	3	im:7151449
ppfibp2b	2.50023e-78	0.178048	0.151	0.009	4.19264e-74	3	ppfibp2b
fstl1a	4.1188e-77	0.416508	0.285	0.041	6.90681e-73	3	fstl1a
mustn1a	4.40156e-77	0.195634	0.203	0.019	7.38098e-73	3	mustn1a
ugt5g1	9.55201e-75	0.131703	0.134	0.007	1.60178e-70	3	ugt5g1
angptl1a	1.02948e-74	0.524404	0.321	0.054	1.72633e-70	3	angptl1a
dcn	2.71892e-74	0.80351	0.82	0.461	4.55936e-70	3	dcn
abhd15a	8.36608e-74	0.379795	0.22	0.025	1.40291e-69	3	abhd15a
cldn11a	1.39013e-73	0.987557	0.295	0.047	2.33111e-69	3	cldn11a
zcchc24	1.58277e-73	0.46785	0.436	0.103	2.65415e-69	3	zcchc24
foxp4	6.10912e-73	0.340435	0.269	0.037	1.02444e-68	3	foxp4
prelp	2.22601e-72	0.175207	0.154	0.011	3.73279e-68	3	prelp
dhrs3b1	8.84041e-72	0.686153	0.426	0.099	1.48245e-67	3	dhrs3b
arsj	9.53516e-71	0.113595	0.105	0.004	1.59895e-66	3	arsj
ebf3a.1	1.73055e-70	0.103201	0.089	0.002	2.90197e-66	3	ebf3a.1
loxl1	1.43034e-69	0.215347	0.21	0.023	2.39854e-65	3	loxl1
c1qtnf51	2.63272e-68	0.624449	0.41	0.095	4.41481e-64	3	c1qtnf5
pmp22a1	4.68466e-68	0.917102	0.934	0.744	7.85571e-64	3	pmp22a
si:dkey-7j14.5	8.09265e-67	0.188391	0.164	0.014	1.35706e-62	3	si:dkey-7j14.5
sema3fa	5.83068e-66	0.211731	0.17	0.016	9.77747e-62	3	sema3fa
sfrp5	1.44519e-65	0.219044	0.125	0.007	2.42343e-61	3	sfrp5
nfixb	2.00577e-65	0.279153	0.298	0.052	3.36348e-61	3	nfixb
zgc:195173	2.74186e-65	0.627085	0.443	0.119	4.59782e-61	3	zgc:195173
loxa	1.97878e-64	0.133416	0.092	0.003	3.31822e-60	3	loxa
hapln1a	2.73263e-64	0.67907	0.121	0.007	4.58235e-60	3	hapln1a
si:ch211-198c19.31	3.4582e-64	0.719677	0.436	0.114	5.79905e-60	3	si:ch211-198c19.3
ehd1b	6.0482e-63	0.402496	0.282	0.049	1.01422e-58	3	ehd1b
lhfpl6	3.38157e-62	0.320044	0.348	0.074	5.67055e-58	3	lhfpl6
abi3bpb	2.10311e-61	0.234649	0.161	0.015	3.5267e-57	3	abi3bpb
dhrs3a1	4.40388e-61	0.613729	0.397	0.102	7.38487e-57	3	dhrs3a
klf2a	5.54836e-61	0.981214	0.518	0.171	9.30405e-57	3	klf2a
hpgd	6.21432e-61	0.226116	0.111	0.006	1.04208e-56	3	hpgd
kalrnb	1.22185e-59	0.208033	0.148	0.013	2.04892e-55	3	kalrnb
si:ch73-173h19.3	1.85861e-59	0.121159	0.102	0.005	3.11671e-55	3	si:ch73-173h19.3
itgb2	3.09689e-59	0.199015	0.2	0.025	5.19318e-55	3	itgb2
ablim1b	3.76932e-59	0.418644	0.42	0.111	6.32078e-55	3	ablim1b
nhsl2	6.89318e-59	0.153417	0.128	0.009	1.15592e-54	3	nhsl2
crip11	1.07847e-58	0.871408	0.331	0.07	1.80849e-54	3	crip1
pdcd6	6.41178e-58	0.385806	0.364	0.086	1.07519e-53	3	pdcd6
fhl1b	1.09866e-57	0.192111	0.19	0.023	1.84234e-53	3	fhl1b
plekho2	1.8091e-57	0.329348	0.334	0.074	3.03368e-53	3	plekho2
pnp4a	1.65282e-56	0.463701	0.085	0.003	2.77162e-52	3	pnp4a
agmo	3.48292e-56	0.168218	0.19	0.024	5.84051e-52	3	agmo
adh8a1	1.41361e-55	1.09955	0.233	0.036	2.37049e-51	3	adh8a
thbs2a	2.03535e-55	0.137779	0.098	0.005	3.41308e-51	3	thbs2a
edil3a	2.37786e-55	0.28499	0.262	0.047	3.98743e-51	3	edil3a
isl2b	2.81955e-55	0.110103	0.089	0.004	4.7281e-51	3	isl2b
prrx1b	2.95601e-55	0.105459	0.098	0.005	4.95693e-51	3	prrx1b
meis2b1	1.39953e-54	0.217984	0.226	0.035	2.34688e-50	3	meis2b
serpinf1	4.00663e-52	0.648847	0.466	0.161	6.71871e-48	3	serpinf1
bcl2b	1.9863e-51	0.177353	0.131	0.012	3.33082e-47	3	bcl2b
syt11a	1.64629e-50	0.141809	0.144	0.015	2.76066e-46	3	syt11a
krt94	1.77877e-50	1.50226	0.721	0.459	2.98281e-46	3	krt94
loxl2b	1.79326e-50	0.285964	0.262	0.052	3.00711e-46	3	loxl2b
zgc:153704	2.03055e-50	0.221993	0.079	0.003	3.40503e-46	3	zgc:153704
col1a1a	3.37594e-50	1.04316	0.836	0.615	5.66111e-46	3	col1a1a
fgfr1a	6.10786e-49	0.156857	0.167	0.021	1.02423e-44	3	fgfr1a
si:ch211-246m6.5	6.72206e-49	0.101	0.102	0.007	1.12722e-44	3	si:ch211-246m6.5
s100a10b	9.2163e-49	0.63302	0.751	0.371	1.54548e-44	3	s100a10b
ptgs1	1.08115e-48	0.158242	0.148	0.016	1.81297e-44	3	ptgs1
emid1	1.59423e-48	0.192625	0.17	0.023	2.67337e-44	3	emid1
klf31	2.59831e-48	0.284921	0.292	0.065	4.3571e-44	3	klf3
phlda3	2.94212e-48	0.234076	0.177	0.025	4.93365e-44	3	phlda3
ivns1abpa	1.10518e-46	0.395999	0.095	0.006	1.85327e-42	3	ivns1abpa
alx4a	2.24867e-46	0.1137	0.095	0.006	3.7708e-42	3	alx4a
prss231	2.5903e-46	0.487	0.436	0.144	4.34368e-42	3	prss23
dock9b	4.53239e-46	0.230565	0.22	0.039	7.60036e-42	3	dock9b
hoxc3a1	4.17002e-45	0.201066	0.233	0.044	6.99271e-41	3	hoxc3a
sult1st6	5.19854e-45	0.216517	0.22	0.04	8.71743e-41	3	sult1st6
cad	7.10389e-45	0.210302	0.095	0.007	1.19125e-40	3	cad
fbxo34	7.89155e-45	0.201824	0.121	0.012	1.32333e-40	3	fbxo34
ehbp1l1b	2.4859e-44	0.160294	0.177	0.026	4.1686e-40	3	ehbp1l1b
ccdc3b	2.50907e-44	0.221212	0.184	0.029	4.20746e-40	3	ccdc3b
lrp1aa	4.71386e-44	0.42346	0.393	0.119	7.90467e-40	3	lrp1aa
sesn1	6.30414e-44	0.56068	0.41	0.134	1.05714e-39	3	sesn1
srpra	2.20258e-43	0.18719	0.102	0.008	3.69351e-39	3	srpra
igf2a1	2.5338e-43	0.333482	0.216	0.04	4.24893e-39	3	igf2a
clu	8.80068e-43	0.668668	0.37	0.111	1.47579e-38	3	clu
hspb8	5.49835e-42	0.148745	0.157	0.022	9.22017e-38	3	hspb8
tnfsf10l	1.15255e-41	0.369352	0.393	0.128	1.93272e-37	3	tnfsf10l
rbp5	2.6209e-41	0.294769	0.17	0.026	4.39499e-37	3	rbp5
prickle1b	3.65636e-41	0.141782	0.144	0.019	6.13134e-37	3	prickle1b
rnd3b	1.39788e-40	0.525723	0.469	0.189	2.34411e-36	3	rnd3b
gpr146	2.03505e-40	0.148463	0.144	0.019	3.41257e-36	3	gpr146
rnd3a	2.91299e-39	0.346898	0.426	0.151	4.88479e-35	3	rnd3a
rbpjb	3.20376e-39	0.222011	0.282	0.071	5.37239e-35	3	rbpjb
flnb	5.70019e-38	0.239109	0.246	0.057	9.55864e-34	3	flnb
hic1	7.02207e-38	0.319825	0.377	0.124	1.17753e-33	3	hic1
arl4ab	8.49132e-38	0.10372	0.108	0.011	1.42391e-33	3	arl4ab
col5a1	1.16017e-37	0.713842	0.672	0.375	1.94548e-33	3	col5a1
tgfbi	1.60339e-37	0.162473	0.095	0.009	2.68872e-33	3	tgfbi
ada	3.2097e-37	0.153991	0.167	0.028	5.38234e-33	3	ada
fgfr2	8.78847e-37	0.288597	0.292	0.081	1.47374e-32	3	fgfr2
crabp1a	4.12909e-36	0.126382	0.089	0.008	6.92406e-32	3	crabp1a
marcksl1a1	6.34183e-36	0.802227	0.948	0.826	1.06346e-31	3	marcksl1a
anxa5b	8.29063e-36	0.53809	0.403	0.15	1.39026e-31	3	anxa5b
col5a2a	1.47299e-35	0.505772	0.593	0.295	2.47005e-31	3	col5a2a
alcama	2.55393e-35	0.351101	0.105	0.012	4.28269e-31	3	alcama
si:dkey-238i5.2	3.81377e-35	0.131514	0.125	0.017	6.39531e-31	3	si:dkey-238i5.2
sulf2b	4.05174e-35	0.212483	0.095	0.009	6.79436e-31	3	sulf2b
neu3.2	4.89284e-35	0.165239	0.17	0.031	8.20481e-31	3	neu3.2
dpysl3	5.07662e-35	0.157554	0.184	0.035	8.51299e-31	3	dpysl3
tgfbr2b	1.20779e-34	0.175123	0.167	0.03	2.02535e-30	3	tgfbr2b
mef2aa	1.29125e-34	0.210236	0.226	0.053	2.16529e-30	3	mef2aa
pcolce2b	2.04143e-34	0.332515	0.341	0.113	3.42328e-30	3	pcolce2b
hsd11b2	3.48713e-34	0.787754	0.475	0.21	5.84757e-30	3	hsd11b2
col16a1	3.74961e-34	0.199063	0.216	0.049	6.28771e-30	3	col16a1
lum	4.54529e-34	0.43783	0.079	0.006	7.62201e-30	3	lum
fstl1b	9.76905e-34	0.506839	0.652	0.371	1.63817e-29	3	fstl1b
si:dkey-16l2.20	1.19386e-33	0.46269	0.377	0.135	2.00199e-29	3	si:dkey-16l2.20
lmo4b	1.30968e-33	0.180311	0.164	0.03	2.19619e-29	3	lmo4b
slc7a3a	1.93967e-33	0.114409	0.062	0.004	3.25264e-29	3	slc7a3a
CT030188.1	2.30614e-33	0.177962	0.2	0.043	3.86716e-29	3	CT030188.1
ackr4b	3.26935e-33	0.137884	0.102	0.011	5.48237e-29	3	ackr4b
il13ra2	8.76029e-33	0.461182	0.108	0.014	1.46901e-28	3	il13ra2
uap1	2.09492e-32	0.154488	0.134	0.021	3.51297e-28	3	uap1
lpar1	8.00968e-32	0.30482	0.37	0.134	1.34314e-27	3	lpar1
kirrel1a	1.63636e-31	0.27433	0.37	0.135	2.74401e-27	3	kirrel1a
angptl41	2.71176e-31	0.44451	0.226	0.058	4.54735e-27	3	angptl4
ctsla	4.29896e-31	0.64862	0.285	0.085	7.20892e-27	3	ctsla
igf2b	5.63032e-31	0.522533	0.433	0.172	9.44148e-27	3	igf2b
iqsec1b	1.17272e-30	0.19477	0.236	0.062	1.96654e-26	3	iqsec1b
sort1a	1.47356e-30	0.261642	0.262	0.076	2.47102e-26	3	sort1a
mmp14b	2.69507e-30	0.291284	0.374	0.141	4.51937e-26	3	mmp14b
zgc:154093	3.52903e-30	0.143952	0.174	0.036	5.91783e-26	3	zgc:154093
hoxa3a	1.0472e-29	0.144204	0.164	0.033	1.75605e-25	3	hoxa3a
metrnla	1.72209e-29	0.230475	0.21	0.052	2.88777e-25	3	metrnla
tnfaip2a	2.79904e-29	0.138953	0.138	0.024	4.69372e-25	3	tnfaip2a
fzd7b	2.90124e-29	0.377801	0.367	0.143	4.86509e-25	3	fzd7b
pamr1	3.3858e-29	0.161825	0.177	0.039	5.67764e-25	3	pamr1
si:ch1073-459j12.1	3.46199e-29	0.491244	0.518	0.265	5.80542e-25	3	si:ch1073-459j12.1
arl6ip5b	3.68423e-29	0.359854	0.367	0.142	6.17808e-25	3	arl6ip5b
sult2st1	4.16075e-29	0.137306	0.128	0.021	6.97716e-25	3	sult2st1
bicc1a	5.28922e-29	0.109473	0.121	0.019	8.86949e-25	3	bicc1a
gmps	1.90208e-28	0.197319	0.095	0.012	3.1896e-24	3	gmps
bag2	2.70508e-28	0.124012	0.134	0.024	4.53615e-24	3	bag2
ptprfb	2.81789e-28	0.133217	0.072	0.007	4.72532e-24	3	ptprfb
hoxa10b	3.44694e-28	0.105309	0.095	0.012	5.78018e-24	3	hoxa10b
col4a5	5.85847e-28	0.19453	0.095	0.012	9.82407e-24	3	col4a5
wfdc1	5.863e-28	0.107009	0.095	0.012	9.83167e-24	3	wfdc1
htra3a1	7.10961e-28	0.116283	0.131	0.023	1.19221e-23	3	htra3a
pbx3b	1.58328e-27	0.127955	0.125	0.021	2.655e-23	3	pbx3b
si:ch211-243a20.3	3.12663e-27	0.300905	0.056	0.004	5.24305e-23	3	si:ch211-243a20.3
meis1a	3.30522e-27	0.205292	0.256	0.078	5.54252e-23	3	meis1a
cemip	6.53304e-27	0.157909	0.121	0.021	1.09553e-22	3	cemip
s100v21	9.97907e-27	0.472097	0.633	0.38	1.67339e-22	3	s100v2
chka1	1.58437e-26	0.145165	0.111	0.018	2.65682e-22	3	chka
c6.11	5.9768e-26	0.698969	0.695	0.513	1.00225e-21	3	c6.1
ccl19a.1	7.17068e-26	0.124384	0.098	0.014	1.20245e-21	3	ccl19a.1
fkbp1ab	1.28306e-25	0.108768	0.052	0.004	2.15156e-21	3	fkbp1ab
itpkcb	2.2018e-25	0.136124	0.161	0.036	3.69221e-21	3	itpkcb
tlr5b	4.13665e-25	0.185591	0.226	0.067	6.93675e-21	3	tlr5b
srpx	5.57319e-25	0.144272	0.134	0.027	9.34569e-21	3	srpx
sesn3	1.01271e-24	0.16067	0.18	0.046	1.69821e-20	3	sesn3
mgst1.2	3.08811e-24	0.264857	0.193	0.052	5.17845e-20	3	mgst1.2
cd631	5.11992e-24	0.43817	0.692	0.481	8.5856e-20	3	cd63
cxcl8b.1	7.39426e-24	0.472878	0.128	0.026	1.23994e-19	3	cxcl8b.1
adam19a	8.7942e-24	0.113209	0.121	0.023	1.4747e-19	3	adam19a
skia	1.8262e-23	0.180308	0.262	0.089	3.06236e-19	3	skia
phlda21	1.94102e-23	0.49111	0.118	0.022	3.2549e-19	3	phlda2
col6a4a	4.26629e-23	0.145754	0.151	0.035	7.15414e-19	3	col6a4a
col6a3	4.49516e-23	0.607668	0.62	0.409	7.53793e-19	3	col6a3
itga5	5.79376e-23	0.171969	0.223	0.069	9.71555e-19	3	itga5
fxyd6l1	8.81407e-23	0.435773	0.452	0.223	1.47803e-18	3	fxyd6l
specc1la	9.96969e-23	0.14432	0.161	0.04	1.67182e-18	3	specc1la
ip6k2b1	1.01434e-22	0.305418	0.246	0.083	1.70094e-18	3	ip6k2b
boc1	1.03936e-22	0.380281	0.561	0.315	1.7429e-18	3	boc
id31	2.50904e-22	0.358347	0.184	0.051	4.2074e-18	3	id3
hoxb3a	3.26375e-22	0.115408	0.131	0.028	5.47297e-18	3	hoxb3a
uck2a	4.74785e-22	0.187591	0.095	0.016	7.96166e-18	3	uck2a
mdka2	1.22558e-21	0.466818	0.502	0.257	2.05517e-17	3	mdka
twist1a	1.2456e-21	0.187948	0.193	0.057	2.08875e-17	3	twist1a
cldn5a	1.65837e-21	0.558038	0.423	0.213	2.78092e-17	3	cldn5a
cish	4.9608e-21	0.236228	0.216	0.07	8.31877e-17	3	cish
ppap2d	4.98555e-21	0.257731	0.397	0.187	8.36027e-17	3	ppap2d
pmp22b1	9.56971e-21	0.391644	0.275	0.107	1.60474e-16	3	pmp22b
glud1a1	1.14964e-20	0.240593	0.21	0.067	1.92783e-16	3	glud1a
glula	2.03194e-20	0.197055	0.118	0.025	3.40735e-16	3	glula
nudt17	2.37826e-20	0.118609	0.157	0.041	3.9881e-16	3	nudt17
ITLN1 (1 of many).11	3.60923e-20	0.323886	0.597	0.353	6.05232e-16	3	ITLN1 (1 of many).1
dusp8a	4.03644e-20	0.263988	0.216	0.073	6.7687e-16	3	dusp8a
fgfr4	4.2972e-20	0.10979	0.141	0.034	7.20598e-16	3	fgfr4
sash1a	6.6656e-20	0.138766	0.092	0.016	1.11775e-15	3	sash1a
pdgfra	6.82652e-20	0.330718	0.302	0.12	1.14474e-15	3	pdgfra
bco2a	8.3161e-20	0.100957	0.125	0.028	1.39453e-15	3	bco2a
inhbaa1	2.01299e-19	0.303224	0.167	0.048	3.37558e-15	3	inhbaa
si:dkey-42i9.6	2.06153e-19	0.208174	0.177	0.052	3.45697e-15	3	si:dkey-42i9.6
pkp3b	2.79303e-19	0.175796	0.148	0.039	4.68364e-15	3	pkp3b
mfap21	2.91462e-19	0.435263	0.59	0.382	4.88752e-15	3	mfap2
etnk11	3.18843e-19	0.120024	0.148	0.038	5.34668e-15	3	etnk1
col11a1b	3.48962e-19	0.111225	0.095	0.018	5.85174e-15	3	col11a1b
c7a	4.09023e-19	0.274345	0.318	0.139	6.85891e-15	3	c7a
bckdhbl	8.108e-19	0.118609	0.154	0.042	1.35963e-14	3	bckdhbl
pdk2a	9.00056e-19	0.131347	0.174	0.052	1.5093e-14	3	pdk2a
bhlhe41	9.33262e-19	0.209506	0.239	0.089	1.56499e-14	3	bhlhe41
abca1a	1.01911e-18	0.221553	0.216	0.076	1.70895e-14	3	abca1a
cd28	1.11527e-18	0.176373	0.256	0.098	1.87019e-14	3	cd28
emx2	1.39786e-18	0.121516	0.102	0.02	2.34407e-14	3	emx2
fgl2a	1.41782e-18	0.239177	0.289	0.118	2.37755e-14	3	fgl2a
cyth1a.1	1.66386e-18	0.105723	0.095	0.018	2.79013e-14	3	cyth1a.1
hprt1	2.10424e-18	0.103639	0.056	0.007	3.52859e-14	3	hprt1
sept9a	3.19471e-18	0.124614	0.092	0.017	5.35722e-14	3	sept9a
serpina10a	3.83375e-18	0.223968	0.338	0.154	6.42881e-14	3	serpina10a
zgc:1539111	8.15157e-18	0.223932	0.066	0.009	1.36694e-13	3	zgc:153911
arrdc3a	1.28464e-17	0.262919	0.157	0.047	2.15421e-13	3	arrdc3a
cyp2p7	1.30986e-17	0.244848	0.325	0.148	2.1965e-13	3	cyp2p7
spry41	1.55708e-17	0.197879	0.262	0.102	2.61107e-13	3	spry4
zfp36l1b	1.90082e-17	0.603661	0.423	0.239	3.18748e-13	3	zfp36l1b
ramp2	2.13261e-17	0.352025	0.167	0.052	3.57617e-13	3	ramp2
gpc1b	3.14798e-17	0.136794	0.138	0.037	5.27885e-13	3	gpc1b
nck1a	3.71485e-17	0.173332	0.252	0.1	6.22943e-13	3	nck1a
rab40b	3.76884e-17	0.164561	0.22	0.081	6.31997e-13	3	rab40b
ghra	7.10675e-17	0.161656	0.223	0.084	1.19173e-12	3	ghra
jam3b1	7.48537e-17	0.257454	0.397	0.212	1.25522e-12	3	jam3b
glulb	8.41148e-17	0.618793	0.144	0.043	1.41052e-12	3	glulb
arrdc2	1.06799e-16	0.143303	0.148	0.043	1.79091e-12	3	arrdc2
ccnd1	1.09907e-16	0.140808	0.21	0.076	1.84303e-12	3	ccnd1
tnfrsf19	1.60757e-16	0.139167	0.184	0.061	2.69574e-12	3	tnfrsf19
sdc2	1.64464e-16	0.120542	0.177	0.058	2.7579e-12	3	sdc2
cdh12	1.69573e-16	0.178343	0.085	0.017	2.84358e-12	3	cdh1
nrp1a	1.73559e-16	0.185732	0.177	0.059	2.91042e-12	3	nrp1a
serinc5	1.91191e-16	0.204822	0.187	0.064	3.20608e-12	3	serinc5
prss351	3.23089e-16	0.204405	0.246	0.097	5.41788e-12	3	prss35
socs3b	4.51139e-16	0.481897	0.341	0.167	7.56515e-12	3	socs3b
ckap4	5.07593e-16	0.170039	0.295	0.132	8.51183e-12	3	ckap4
ctdspla	7.92366e-16	0.200396	0.279	0.121	1.32872e-11	3	ctdspla
si:ch1073-291c23.2	1.09588e-15	0.333269	0.518	0.311	1.83769e-11	3	si:ch1073-291c23.2
tmem106ba	1.13278e-15	0.133853	0.18	0.062	1.89956e-11	3	tmem106ba
add3a	1.34272e-15	0.257374	0.364	0.183	2.2516e-11	3	add3a
mych	1.58428e-15	0.256444	0.193	0.07	2.65668e-11	3	mych
gnsa	1.69422e-15	0.137986	0.226	0.089	2.84103e-11	3	gnsa
eif4ebp3l	1.83641e-15	0.374419	0.311	0.149	3.07947e-11	3	eif4ebp3l
cldn7a	2.18313e-15	0.191321	0.111	0.028	3.66089e-11	3	cldn7a
CU468917.11	2.25677e-15	0.204284	0.272	0.115	3.78439e-11	3	CU468917.1
fbln51	3.16868e-15	0.350064	0.397	0.216	5.31356e-11	3	fbln5
tcima	5.09868e-15	0.301026	0.089	0.019	8.54998e-11	3	tcima
grk41	5.73616e-15	0.173456	0.259	0.113	9.61896e-11	3	grk4
rab10	2.53571e-14	0.179599	0.275	0.125	4.25214e-10	3	rab10
map3k14a	2.55738e-14	0.127733	0.167	0.058	4.28847e-10	3	map3k14a
gsdf	3.81013e-14	0.610306	0.098	0.025	6.38921e-10	3	gsdf
tns2b	4.30286e-14	0.128473	0.17	0.061	7.21547e-10	3	tns2b
c6	4.5389e-14	0.196044	0.272	0.126	7.61128e-10	3	c6
pnrc21	9.53329e-14	0.415843	0.685	0.544	1.59864e-09	3	pnrc2
lama41	1.23689e-13	0.194425	0.361	0.186	2.07414e-09	3	lama4
slc39a13	1.51965e-13	0.133357	0.098	0.025	2.5483e-09	3	slc39a13
cyp1c21	1.73014e-13	0.175954	0.095	0.024	2.90127e-09	3	cyp1c2
colec121	1.7402e-13	0.230821	0.423	0.244	2.91814e-09	3	colec12
map1lc3a	3.4558e-13	0.185135	0.226	0.095	5.79503e-09	3	map1lc3a
smu1b	4.13382e-13	0.103746	0.095	0.025	6.932e-09	3	smu1b
fn1b1	5.19255e-13	0.420103	0.351	0.192	8.70739e-09	3	fn1b
tenm3	5.23525e-13	0.142886	0.17	0.064	8.77899e-09	3	tenm3
napsa	6.62501e-13	0.10888	0.128	0.04	1.11095e-08	3	napsa
tuba8l31	7.62665e-13	0.138613	0.275	0.128	1.27891e-08	3	tuba8l3
tmem198b	8.87801e-13	0.1017	0.092	0.024	1.48875e-08	3	tmem198b
gmnn	1.55314e-12	0.1462	0.066	0.013	2.60446e-08	3	gmnn
si:ch211-133n4.4	1.60442e-12	0.146351	0.262	0.123	2.69045e-08	3	si:ch211-133n4.4
ccn11	1.91603e-12	0.631224	0.554	0.383	3.213e-08	3	ccn1
psap1	2.05651e-12	0.190183	0.125	0.04	3.44856e-08	3	psap
cxcl8b.3	2.56071e-12	0.123522	0.062	0.012	4.29405e-08	3	cxcl8b.3
sparc1	2.61982e-12	0.461453	0.905	0.902	4.39317e-08	3	sparc
anxa2a	2.78233e-12	0.346746	0.318	0.164	4.66569e-08	3	anxa2a
meis1b	4.10848e-12	0.202686	0.37	0.208	6.8895e-08	3	meis1b
pon3.2.1	4.13107e-12	0.123279	0.138	0.047	6.9274e-08	3	pon3.2.1
raraa	4.21538e-12	0.110845	0.203	0.085	7.06877e-08	3	raraa
si:ch211-195m9.31	5.1007e-12	0.144754	0.148	0.053	8.55336e-08	3	si:ch211-195m9.3
anxa13	6.92729e-12	0.241358	0.292	0.149	1.16164e-07	3	anxa13
serpinh2	8.21906e-12	0.130698	0.239	0.111	1.37825e-07	3	serpinh2
il11ra	8.27432e-12	0.146144	0.22	0.099	1.38752e-07	3	il11ra
cd164	1.04899e-11	0.122103	0.128	0.043	1.75906e-07	3	cd164
tent5c	1.05122e-11	0.108722	0.059	0.012	1.76279e-07	3	tent5c
cxcl8a	1.05448e-11	0.156997	0.052	0.009	1.76825e-07	3	cxcl8a
kcne41	1.28106e-11	0.202296	0.102	0.03	2.14821e-07	3	kcne4
fxyd11	1.30343e-11	0.270705	0.361	0.207	2.18572e-07	3	fxyd1
spon1b	1.58668e-11	0.247558	0.321	0.181	2.66071e-07	3	spon1b
rhogb	1.62087e-11	0.139855	0.243	0.115	2.71803e-07	3	rhogb
lrrc17	1.66853e-11	0.283273	0.285	0.154	2.79796e-07	3	lrrc17
rdh10b	1.76602e-11	0.160852	0.059	0.012	2.96144e-07	3	rdh10b
nrarpa1	2.24819e-11	0.148471	0.085	0.023	3.76998e-07	3	nrarpa
creb3l3l	2.82044e-11	0.167045	0.249	0.122	4.72959e-07	3	creb3l3l
smad7	3.41095e-11	0.110205	0.18	0.074	5.71982e-07	3	smad7
cyp2ad31	3.42916e-11	0.259525	0.354	0.207	5.75036e-07	3	cyp2ad3
rab5aa	3.51261e-11	0.125299	0.138	0.049	5.8903e-07	3	rab5aa
zfp36l2	5.15828e-11	0.228593	0.21	0.095	8.64992e-07	3	zfp36l2
zgc:1583431	7.51245e-11	0.432281	0.289	0.155	1.25976e-06	3	zgc:158343
agtr21	9.17372e-11	0.118118	0.216	0.099	1.53834e-06	3	agtr2
proza	9.61262e-11	0.174081	0.334	0.184	1.61194e-06	3	proza
cst31	1.08536e-10	0.327088	0.587	0.447	1.82004e-06	3	cst3
mbnl3	1.61347e-10	0.104207	0.118	0.04	2.70563e-06	3	mbnl3
arl4d	1.6798e-10	0.120411	0.085	0.024	2.81686e-06	3	arl4d
capn2a	1.70829e-10	0.193932	0.315	0.173	2.86463e-06	3	capn2a
creb3l2	1.92837e-10	0.12837	0.226	0.107	3.23368e-06	3	creb3l2
zgc:158564	2.22735e-10	0.101925	0.17	0.071	3.73504e-06	3	zgc:158564
dusp11	2.25461e-10	0.276617	0.226	0.109	3.78075e-06	3	dusp1
FP102018.1	2.8713e-10	0.103073	0.138	0.052	4.81489e-06	3	FP102018.1
tpst1	3.68361e-10	0.112566	0.174	0.075	6.17704e-06	3	tpst1
glipr2l1	3.7789e-10	0.155583	0.085	0.025	6.33683e-06	3	glipr2l
degs1	4.62462e-10	0.125332	0.193	0.087	7.75503e-06	3	degs1
tagln2	5.0523e-10	0.295924	0.348	0.209	8.47221e-06	3	tagln2
cyp2n13	5.89195e-10	0.113697	0.174	0.075	9.88022e-06	3	cyp2n13
gnaia	7.47683e-10	0.100283	0.115	0.04	1.25379e-05	3	gnaia
synm	1.74501e-09	0.113022	0.144	0.059	2.92621e-05	3	synm
notch31	2.41731e-09	0.164873	0.151	0.062	4.05358e-05	3	notch3
c41	2.48381e-09	0.286204	0.4	0.252	4.16511e-05	3	c4
nfil3-61	2.68536e-09	0.106545	0.098	0.033	4.50308e-05	3	nfil3-6
cxcl18b	3.12609e-09	0.542711	0.42	0.285	5.24215e-05	3	cxcl18b
aoc21	3.25713e-09	0.320402	0.22	0.113	5.46188e-05	3	aoc2
anxa11a	4.38878e-09	0.158785	0.18	0.084	7.35954e-05	3	anxa11a
zfyve21	4.82934e-09	0.1195	0.167	0.074	8.09831e-05	3	zfyve21
txnipa	4.90931e-09	0.29221	0.449	0.311	8.23242e-05	3	txnipa
gstt1b	6.77082e-09	0.157444	0.157	0.069	0.00011354	3	gstt1b
cdkn1bb	9.00698e-09	0.136941	0.164	0.073	0.000151038	3	cdkn1bb
si:ch73-335l21.41	1.03042e-08	0.542049	0.472	0.336	0.000172791	3	si:ch73-335l21.4
aplp1	1.19732e-08	0.119717	0.197	0.097	0.000200778	3	aplp1
si:ch211-212k18.81	1.60803e-08	0.209198	0.38	0.249	0.00026965	3	si:ch211-212k18.8
sdf4	1.9463e-08	0.106031	0.17	0.08	0.000326375	3	sdf4
nid1a	4.12088e-08	0.175215	0.305	0.179	0.00069103	3	nid1a
cyp2p6	4.3388e-08	0.198024	0.279	0.167	0.000727573	3	cyp2p6
col4a11	5.61017e-08	0.198385	0.315	0.191	0.000940769	3	col4a1
nccrp1	6.05705e-08	0.109797	0.134	0.058	0.00101571	3	nccrp1
plecb	6.48502e-08	0.171002	0.266	0.152	0.00108747	3	plecb
cavin2a	6.86914e-08	0.144331	0.279	0.163	0.00115189	3	cavin2a
mdkb1	7.6978e-08	0.112548	0.079	0.026	0.00129084	3	mdkb
anxa3b	8.18991e-08	0.180358	0.2	0.104	0.00137337	3	anxa3b
si:dkey-177p2.6	9.03984e-08	0.110893	0.256	0.143	0.00151589	3	si:dkey-177p2.6
klf11b	9.13918e-08	0.226102	0.21	0.112	0.00153255	3	klf11b
zfhx31	9.47091e-08	0.125769	0.141	0.063	0.00158818	3	zfhx3
reep5	1.23926e-07	0.193223	0.269	0.158	0.00207811	3	reep5
gbp	1.29254e-07	0.144407	0.154	0.071	0.00216746	3	gbp
pttg1ipb	1.30215e-07	0.128258	0.164	0.078	0.00218358	3	pttg1ipb
pbx1a	1.73845e-07	0.226099	0.344	0.232	0.0029152	3	pbx1a
TCIM (1 of many)1	1.85746e-07	0.198552	0.066	0.02	0.00311477	3	TCIM (1 of many)
ahr2	2.43865e-07	0.105441	0.239	0.134	0.00408937	3	ahr2
dedd11	2.67685e-07	0.190089	0.361	0.232	0.00448882	3	dedd1
dusp5	2.77766e-07	0.114489	0.052	0.014	0.00465786	3	dusp5
tmem59	3.16935e-07	0.104151	0.115	0.048	0.00531468	3	tmem59
col4a6	3.223e-07	0.133136	0.098	0.039	0.00540465	3	col4a6
nfia	3.97482e-07	0.138564	0.298	0.187	0.00666538	3	nfia
CU459056.1	4.6408e-07	0.109096	0.17	0.086	0.00778216	3	CU459056.1
ece1	5.91825e-07	0.101925	0.154	0.076	0.00992431	3	ece1
ywhah	6.28563e-07	0.114893	0.19	0.102	0.0105404	3	ywhah
mmp14a	8.1274e-07	0.156121	0.246	0.142	0.0136288	3	mmp14a
tmem1761	8.31258e-07	0.169671	0.439	0.306	0.0139394	3	tmem176
lipf	8.3786e-07	0.153828	0.243	0.143	0.0140501	3	lipf
ginm1	9.32491e-07	0.101991	0.148	0.07	0.0156369	3	ginm1
tspan7	9.93593e-07	0.136004	0.174	0.091	0.0166616	3	tspan7
atp1a1a.1	1.06085e-06	0.144597	0.118	0.052	0.0177893	3	atp1a1a.1
antxr2a1	1.10165e-06	0.148291	0.407	0.285	0.0184736	3	antxr2a
slco2b1	1.20984e-06	0.209213	0.243	0.146	0.0202878	3	slco2b1
arf2a	1.40347e-06	0.104567	0.095	0.039	0.0235348	3	arf2a
si:ch211-1a19.3	1.68242e-06	0.11637	0.207	0.113	0.0282125	3	si:ch211-1a19.3
DDX17	1.78383e-06	0.117294	0.174	0.091	0.029913	3	DDX17
col4a21	1.84176e-06	0.126752	0.269	0.162	0.0308845	3	col4a2
CABZ01068358.11	1.98989e-06	0.138747	0.148	0.073	0.0333684	3	CABZ01068358.1
cdon	2.34726e-06	0.112869	0.298	0.189	0.0393612	3	cdon
sdcbp2	2.62101e-06	0.178911	0.305	0.2	0.0439517	3	sdcbp2
zfand5a	2.73857e-06	0.127947	0.161	0.084	0.045923	3	zfand5a
sqstm11	3.70364e-06	0.111849	0.128	0.061	0.0621063	3	sqstm1
rab2a	4.40382e-06	0.139594	0.19	0.107	0.0738477	3	rab2a
pim11	4.47182e-06	0.198213	0.311	0.197	0.0749879	3	pim1
soul5	4.65177e-06	0.125423	0.243	0.148	0.0780056	3	soul5
hspb11	5.25845e-06	0.471924	0.58	0.512	0.0881789	3	hspb1
cdc42l	5.7023e-06	0.109636	0.164	0.087	0.0956219	3	cdc42l
perp	7.12656e-06	0.14492	0.174	0.096	0.119505	3	perp
ctsk	8.40291e-06	0.103528	0.203	0.118	0.140908	3	ctsk
gnb1a	1.61437e-05	0.149194	0.272	0.178	0.270713	3	gnb1a
jund1	1.73188e-05	0.190267	0.364	0.26	0.29042	3	jund
b2ml1	2.00769e-05	0.162802	0.731	0.687	0.336669	3	b2ml
ppt11	2.35523e-05	0.104478	0.161	0.088	0.394948	3	ppt1
gabarapb	2.81208e-05	0.162856	0.311	0.216	0.471558	3	gabarapb
pho	3.26994e-05	0.138393	0.187	0.109	0.548336	3	pho
gas1a	3.56513e-05	0.115287	0.302	0.206	0.597837	3	gas1a
gstp11	3.73045e-05	0.109189	0.157	0.087	0.625559	3	gstp1
dnajb1b1	5.2011e-05	0.250631	0.603	0.492	0.872173	3	dnajb1b
tnrc6c11	5.57215e-05	0.110668	0.266	0.171	0.934393	3	tnrc6c1
nr4a11	5.63036e-05	0.130442	0.056	0.021	0.944155	3	nr4a1
h3f3d	6.50466e-05	0.176157	0.289	0.193	1	3	h3f3d
sntb2	6.55654e-05	0.11779	0.321	0.225	1	3	sntb2
bccip	7.1969e-05	0.116922	0.148	0.084	1	3	bccip
amotl2a	8.21439e-05	0.112704	0.118	0.061	1	3	amotl2a
il15ra	8.69553e-05	0.126977	0.223	0.146	1	3	il15ra
nupr1b	0.00010269	0.294037	0.069	0.029	1	3	nupr1b
ier2b1	0.000112198	0.281941	0.472	0.368	1	3	ier2b
cpxm1a	0.000126096	0.129577	0.2	0.128	1	3	cpxm1a
tgm1l11	0.000145481	0.183658	0.295	0.217	1	3	tgm1l1
si:dkey-7j14.61	0.000165807	0.128478	0.626	0.516	1	3	si:dkey-7j14.6
appa	0.000230228	0.207639	0.148	0.09	1	3	appa
tmem200b	0.000234589	0.109357	0.2	0.13	1	3	tmem200b
id1	0.00024454	0.423054	0.344	0.253	1	3	id1
selenop1	0.000246005	0.156443	0.574	0.501	1	3	selenop
tob1a1	0.00027043	0.141215	0.167	0.102	1	3	tob1a
anxa11b	0.000293154	0.12363	0.213	0.14	1	3	anxa11b
ddx51	0.000341989	0.14433	0.174	0.108	1	3	ddx5
olfml3b	0.000517942	0.167179	0.269	0.199	1	3	olfml3b
btg22	0.000588735	0.224194	0.862	0.811	1	3	btg2
rgs5b1	0.00109499	0.44104	0.118	0.069	1	3	rgs5b
higd1a1	0.00116265	0.133136	0.236	0.167	1	3	higd1a
cst14a.2	0.00153656	0.113383	0.128	0.079	1	3	cst14a.2
gadd45ba1	0.00159293	0.34975	0.577	0.509	1	3	gadd45ba
hsd3b7	0.00165527	0.139096	0.089	0.049	1	3	hsd3b7
gabarapa	0.00170107	0.101935	0.161	0.105	1	3	gabarapa
vcam1b1	0.00178195	0.140259	0.236	0.171	1	3	vcam1b
nfkbiab	0.00191707	0.153576	0.216	0.15	1	3	nfkbiab
col6a2	0.0032762	0.265307	0.374	0.328	1	3	col6a2
egr11	0.0033823	0.177222	0.472	0.388	1	3	egr1
lgals3b	0.00346964	0.168804	0.243	0.183	1	3	lgals3b
nupr1a	0.00354881	0.124779	0.197	0.139	1	3	nupr1a
mt21	0.00557716	0.121833	0.069	0.037	1	3	mt2
oaz1a	0.00613357	0.161872	0.164	0.116	1	3	oaz1a
cfd	0.0077194	0.728948	0.111	0.072	1	3	cfd
col6a1	0.00858274	0.301924	0.387	0.358	1	3	col6a1
socs3a1	0.00891371	0.205356	0.757	0.716	1	3	socs3a
tmem176l.11	0.0092941	0.117324	0.58	0.514	1	3	tmem176l.1

## Sheet: OCE (SC5)
	p_val	avg_logFC	pct.1	pct.2	p_val_adj	cluster	gene
gstm.3	0	2.33155	0.928	0.059	0	5	gstm.3
krt4	0	2.19587	0.842	0.053	0	5	krt4
tmsb11	0	2.04192	0.737	0.039	0	5	tmsb1
cldnc	0	1.55779	0.669	0.009	0	5	cldnc
gcga	0	1.16435	0.36	0.004	0	5	gcga
ucmaa	0	0.84016	0.486	0.008	0	5	ucmaa
si:ch211-137i24.10	5.85357e-283	0.83189	0.511	0.027	9.81585e-279	5	si:ch211-137i24.10
slc29a1b	6.82274e-277	0.707456	0.385	0.012	1.14411e-272	5	slc29a1b
s100a10a	1.94554e-266	2.2345	0.525	0.033	3.26248e-262	5	s100a10a
icn1	9.83929e-244	1.81924	0.827	0.122	1.64995e-239	5	icn
stm	9.98844e-232	1.12515	0.227	0.002	1.67496e-227	5	stm
CABZ01085139.1	3.29516e-228	0.445541	0.342	0.012	5.52565e-224	5	CABZ01085139.1
sccpdha	3.39023e-228	0.396736	0.299	0.007	5.68508e-224	5	sccpdha
si:ch211-66e2.3	2.88692e-221	0.589782	0.353	0.014	4.84107e-217	5	si:ch211-66e2.3
adh8a2	4.14309e-208	1.6568	0.428	0.027	6.94754e-204	5	adh8a
itgb41	3.35202e-187	0.320672	0.309	0.013	5.621e-183	5	itgb4
cfd1	4.96825e-185	1.51582	0.514	0.051	8.33126e-181	5	cfd
s100a10b1	1.52755e-182	1.97886	0.968	0.362	2.56155e-178	5	s100a10b
si:ch211-105c13.31	7.09873e-180	0.826629	0.745	0.123	1.19039e-175	5	si:ch211-105c13.3
krt15	5.57741e-167	2.14578	0.982	0.46	9.35275e-163	5	krt15
spaca4l	1.13453e-160	0.293579	0.245	0.009	1.9025e-156	5	spaca4l
fgf24	1.04369e-159	0.214634	0.194	0.004	1.75016e-155	5	fgf24
wnt7aa	3.2429e-157	0.195714	0.173	0.002	5.43801e-153	5	wnt7aa
sox7	8.39245e-149	0.639898	0.223	0.008	1.40733e-144	5	sox7
tmod4	1.80599e-148	0.199611	0.151	0.001	3.02847e-144	5	tmod4
pax2a1	3.12194e-147	0.390666	0.219	0.007	5.23519e-143	5	pax2a
fgf18b	2.81268e-146	0.134049	0.133	0	4.71659e-142	5	fgf18b
cavin1b1	3.08258e-146	0.795845	0.579	0.091	5.16917e-142	5	cavin1b
si:ch211-156j16.1	5.80792e-142	0.838636	0.55	0.081	9.73929e-138	5	si:ch211-156j16.1
emx21	1.01326e-124	0.39058	0.241	0.014	1.69914e-120	5	emx2
anxa1a	5.49628e-119	1.46168	0.95	0.554	9.21671e-115	5	anxa1a
krt8	1.11568e-117	1.2457	0.996	0.773	1.87089e-113	5	krt8
anxa2a1	1.53345e-112	0.995824	0.662	0.147	2.57144e-108	5	anxa2a
mstnb	7.68894e-110	0.25734	0.108	0.001	1.28936e-105	5	mstnb
slc43a3b	1.3322e-108	0.701726	0.565	0.109	2.23397e-104	5	slc43a3b
si:ch211-63p21.1	1.36666e-108	0.193457	0.191	0.009	2.29176e-104	5	si:ch211-63p21.1
si:ch211-170d8.8	6.57722e-107	0.171055	0.165	0.006	1.10293e-102	5	si:ch211-170d8.8
si:dkey-183k8.2	4.53536e-105	0.115382	0.09	0	7.60535e-101	5	si:dkey-183k8.2
BX005305.2	9.40314e-101	0.105149	0.094	0	1.57681e-96	5	BX005305.2
kitlga	2.061e-97	0.224075	0.194	0.011	3.45609e-93	5	kitlga
lgals3b1	3.14018e-97	0.64355	0.647	0.162	5.26576e-93	5	lgals3b
tent5bb	1.5092e-96	0.156448	0.126	0.003	2.53078e-92	5	tent5bb
tmeff2a	2.39463e-96	0.189913	0.147	0.005	4.01555e-92	5	tmeff2a
vim1	3.77389e-96	0.723309	0.486	0.093	6.32844e-92	5	vim
c1qtnf12	1.43587e-94	0.153799	0.151	0.006	2.40781e-90	5	c1qtnf12
hoxb3a1	1.56467e-94	0.228252	0.252	0.022	2.6238e-90	5	hoxb3a
pdlim5a	1.85812e-90	0.174951	0.176	0.01	3.11587e-86	5	pdlim5a
tnfsf14	2.16362e-89	0.111219	0.09	0.001	3.62817e-85	5	tnfsf14
slc43a1b	5.30165e-89	0.294733	0.342	0.047	8.89033e-85	5	slc43a1b
krt941	1.4993e-87	1.08852	0.903	0.451	2.51418e-83	5	krt94
nccrp11	1.82233e-87	0.579585	0.338	0.047	3.05586e-83	5	nccrp1
cygb2	2.83445e-87	0.188706	0.165	0.009	4.7531e-83	5	cygb2
ptgs11	2.35405e-85	0.195826	0.198	0.014	3.9475e-81	5	ptgs1
ehd2b1	2.96237e-82	0.533423	0.586	0.148	4.96759e-78	5	ehd2b
ccdc173	9.44566e-82	0.1478	0.119	0.004	1.58394e-77	5	ccdc173
aldh9a1a.1	1.12109e-80	0.852764	0.896	0.488	1.87996e-76	5	aldh9a1a.1
s100v1	2.62486e-80	0.16029	0.151	0.008	4.40163e-76	5	s100v1
ak2	4.13492e-79	0.94404	0.507	0.115	6.93384e-75	5	ak2
si:dkey-16p21.8	2.59041e-77	0.203349	0.162	0.01	4.34386e-73	5	si:dkey-16p21.8
fsta	1.16526e-76	0.244315	0.201	0.018	1.95402e-72	5	fsta
cxcl20	9.70507e-76	0.18024	0.122	0.005	1.62744e-71	5	cxcl20
si:dkey-7j14.51	1.08889e-74	0.203386	0.18	0.014	1.82597e-70	5	si:dkey-7j14.5
crip12	2.85555e-73	0.534393	0.385	0.069	4.78848e-69	5	crip1
sema3d1	5.78617e-72	0.198249	0.194	0.017	9.70283e-68	5	sema3d
si:dkey-180p18.9	4.12745e-71	0.433214	0.493	0.116	6.92132e-67	5	si:dkey-180p18.9
zgc:92360	2.60062e-70	0.141564	0.151	0.01	4.36098e-66	5	zgc:92360
lmo1	6.21784e-70	0.323453	0.198	0.019	1.04267e-65	5	lmo1
eppk1	2.9401e-67	0.7194	0.525	0.152	4.93026e-63	5	eppk1
pkp3b1	2.08981e-66	0.314274	0.252	0.034	3.5044e-62	5	pkp3b
rspo31	2.50011e-66	0.244789	0.187	0.018	4.19244e-62	5	rspo3
itga6b	6.83232e-66	0.424941	0.27	0.04	1.14571e-61	5	itga6b
tgm2b	6.27033e-65	0.711268	0.457	0.121	1.05147e-60	5	tgm2b
bcam	2.38932e-64	0.578829	0.201	0.022	4.00665e-60	5	bcam
zgc:112437	1.40656e-62	0.163893	0.147	0.011	2.35865e-58	5	zgc:112437
ngfb	4.49507e-62	0.107039	0.104	0.005	7.53779e-58	5	ngfb
slc12a7b	6.50889e-62	0.256332	0.27	0.042	1.09148e-57	5	slc12a7b
gstm.1	3.53187e-61	0.61632	0.64	0.216	5.92259e-57	5	gstm.1
fn1b2	8.55041e-60	0.808687	0.547	0.182	1.43382e-55	5	fn1b
celsr1a	2.84683e-59	0.13528	0.126	0.008	4.77385e-55	5	celsr1a
wdr93	3.6443e-59	0.121797	0.129	0.009	6.11112e-55	5	wdr93
tmem238a	5.44646e-59	0.109853	0.122	0.008	9.13317e-55	5	tmem238a
mgst3a1	3.0607e-58	0.301181	0.277	0.046	5.13248e-54	5	mgst3a
si:dkey-16l2.201	3.68964e-58	0.426979	0.489	0.131	6.18716e-54	5	si:dkey-16l2.20
cfl1l	1.52794e-57	0.93196	0.353	0.079	2.5622e-53	5	cfl1l
znf395a	5.79501e-57	0.25779	0.205	0.026	9.71766e-53	5	znf395a
cd59	2.37875e-56	0.1116	0.058	0.001	3.98892e-52	5	cd59
si:ch211-198c19.32	1.1548e-55	0.44265	0.442	0.115	1.93648e-51	5	si:ch211-198c19.3
gchfr1	1.52925e-55	0.247535	0.277	0.048	2.56441e-51	5	gchfr
timp4.3	1.64656e-55	0.152516	0.133	0.01	2.76112e-51	5	timp4.3
cd99	1.78235e-53	0.306531	0.331	0.068	2.98882e-49	5	cd99
slco2b11	2.3494e-53	0.454136	0.464	0.135	3.93971e-49	5	slco2b1
tfa	4.93776e-52	0.212316	0.122	0.009	8.28014e-48	5	tfa
krt18a.11	1.50953e-51	1.0982	0.662	0.29	2.53132e-47	5	krt18a.1
frya	6.11976e-51	0.17767	0.212	0.031	1.02622e-46	5	frya
luzp2	8.14487e-51	0.113421	0.112	0.008	1.36581e-46	5	luzp2
si:ch211-207i1.2	1.16346e-50	0.178077	0.194	0.026	1.95101e-46	5	si:ch211-207i1.2
tmem79b	2.128e-50	0.132738	0.14	0.013	3.56844e-46	5	tmem79b
hoxa3a1	3.63323e-50	0.16336	0.212	0.031	6.09256e-46	5	hoxa3a
mycbp	1.2604e-49	0.291215	0.281	0.054	2.11356e-45	5	mycbp
id11	1.95436e-49	0.630937	0.647	0.238	3.27727e-45	5	id1
tjp1a	3.74062e-49	0.281255	0.291	0.06	6.27264e-45	5	tjp1a
hoxc3a2	4.6672e-49	0.187039	0.252	0.044	7.82644e-45	5	hoxc3a
f11r.11	1.37874e-48	0.217207	0.223	0.035	2.31201e-44	5	f11r.1
krt912	2.44671e-48	1.19303	0.698	0.307	4.10288e-44	5	krt91
pik3ip1	4.96555e-48	0.296155	0.288	0.058	8.32672e-44	5	pik3ip1
alkal2b1	6.43427e-48	0.281914	0.122	0.01	1.07896e-43	5	alkal2b
elovl1b	8.31488e-48	0.356108	0.486	0.144	1.39432e-43	5	elovl1b
cdh61	8.9746e-48	0.256806	0.173	0.022	1.50495e-43	5	cdh6
endouc1	1.70602e-47	0.864808	0.331	0.08	2.86083e-43	5	endouc
sult1st61	4.32292e-47	0.200582	0.234	0.04	7.2491e-43	5	sult1st6
spata4	4.56362e-47	0.121094	0.094	0.006	7.65274e-43	5	spata4
cldn7a1	5.07691e-47	0.30268	0.183	0.025	8.51347e-43	5	cldn7a
foxj1a	6.46234e-47	0.105337	0.065	0.002	1.08367e-42	5	foxj1a
ndrg1a1	2.34974e-46	0.246866	0.158	0.019	3.94028e-42	5	ndrg1a
rspo1	5.86331e-45	0.101211	0.097	0.006	9.83219e-41	5	rspo1
hdlbpa	1.73529e-44	0.533538	0.622	0.248	2.9099e-40	5	hdlbpa
edil3a1	4.42597e-42	0.237175	0.245	0.049	7.42191e-38	5	edil3a
mmp2	6.92076e-42	0.395412	0.633	0.245	1.16054e-37	5	mmp2
igf2b1	1.2309e-41	0.45586	0.496	0.17	2.0641e-37	5	igf2b
flnb1	1.33273e-41	0.23518	0.266	0.057	2.23485e-37	5	flnb
prpf6	2.86727e-41	0.248972	0.133	0.015	4.80813e-37	5	prpf6
sost2	3.32636e-41	0.360883	0.255	0.053	5.57797e-37	5	sost
foxp41	1.38158e-40	0.27944	0.219	0.041	2.31677e-36	5	foxp4
cfap451	2.38304e-40	0.139726	0.144	0.018	3.99612e-36	5	cfap45
cyp1c22	2.14037e-39	0.20157	0.155	0.021	3.58918e-35	5	cyp1c2
eno1a	4.12827e-39	0.316922	0.299	0.074	6.92269e-35	5	eno1a
akt1s1	4.27625e-39	0.208823	0.23	0.045	7.17084e-35	5	akt1s1
rtn3	5.60161e-39	0.205249	0.198	0.034	9.39333e-35	5	rtn3
cxcl18a.1	9.94962e-39	0.105143	0.086	0.006	1.66845e-34	5	cxcl18a.1
zfp36l1b1	1.29132e-38	0.499897	0.579	0.232	2.16541e-34	5	zfp36l1b
gstt1b1	1.65578e-38	0.236395	0.277	0.063	2.77658e-34	5	gstt1b
pfn12	1.79463e-38	0.248187	0.435	0.132	3.00941e-34	5	pfn1
vamp31	2.8947e-38	0.277151	0.489	0.16	4.85412e-34	5	vamp3
ube2e3	9.68027e-38	0.324486	0.536	0.193	1.62328e-33	5	ube2e3
enkur	1.04534e-37	0.106471	0.076	0.005	1.75293e-33	5	enkur
hoxb7a	1.38108e-37	0.133033	0.151	0.021	2.31593e-33	5	hoxb7a
nfia1	1.69883e-37	0.282516	0.489	0.178	2.84876e-33	5	nfia
gipc2	1.84621e-37	0.14882	0.173	0.028	3.09591e-33	5	gipc2
prss352	2.53466e-37	0.255777	0.338	0.093	4.25037e-33	5	prss35
aldoaa	1.24443e-36	0.336783	0.417	0.131	2.08679e-32	5	aldoaa
pxna1	4.42085e-36	0.152265	0.144	0.02	7.41333e-32	5	pxna
cxcl8b.31	4.73715e-36	0.247938	0.104	0.01	7.94372e-32	5	cxcl8b.3
cebpa1	5.48474e-36	0.324276	0.291	0.076	9.19736e-32	5	cebpa
nxn	9.8743e-36	0.152449	0.194	0.036	1.65582e-31	5	nxn
ptmaa2	1.2305e-35	0.307167	0.687	0.29	2.06343e-31	5	ptmaa
actb21	1.67363e-35	0.305223	1	0.996	2.80651e-31	5	actb2
AL954191.1	1.47062e-34	0.304429	0.252	0.061	2.46609e-30	5	AL954191.1
im:71514491	3.08976e-34	0.149378	0.176	0.031	5.18121e-30	5	im:7151449
tlr5b1	2.45068e-33	0.178242	0.263	0.066	4.10955e-29	5	tlr5b
neu3.21	2.93414e-33	0.201438	0.173	0.031	4.92027e-29	5	neu3.2
efna1b	3.1158e-33	0.24945	0.241	0.058	5.22488e-29	5	efna1b
prr131	1.21107e-32	0.110827	0.129	0.018	2.03084e-28	5	prr13
ppp1r13l	1.21267e-32	0.191467	0.201	0.043	2.03353e-28	5	ppp1r13l
cadm4	3.0345e-32	0.233524	0.36	0.116	5.08856e-28	5	cadm4
vdac31	4.51152e-32	0.259626	0.374	0.12	7.56538e-28	5	vdac3
prss232	6.47524e-32	0.372534	0.403	0.148	1.08583e-27	5	prss23
c4b	1.34531e-31	0.217676	0.169	0.031	2.25596e-27	5	c4b
cygb11	1.50271e-31	0.844625	0.5	0.22	2.5199e-27	5	cygb1
si:dkey-51e6.11	1.98067e-31	0.295263	0.378	0.127	3.32138e-27	5	si:dkey-51e6.1
tagln21	2.82236e-31	0.27452	0.529	0.2	4.73281e-27	5	tagln2
pcdh10b	3.21759e-31	0.289823	0.302	0.091	5.39558e-27	5	pcdh10b
aoc22	3.35818e-31	0.462512	0.335	0.107	5.63132e-27	5	aoc2
arpc1a	6.01325e-31	0.194731	0.212	0.047	1.00836e-26	5	arpc1a
palm3	1.45071e-30	0.109973	0.133	0.02	2.43269e-26	5	palm3
col1a21	1.4522e-30	0.531431	0.694	0.461	2.43519e-26	5	col1a2
cotl12	1.68255e-30	0.304932	0.417	0.149	2.82147e-26	5	cotl1
fhl1b1	2.00873e-30	0.143231	0.151	0.026	3.36844e-26	5	fhl1b
s100v22	2.06507e-30	0.376441	0.748	0.375	3.46291e-26	5	s100v2
zgc:158463	2.99226e-30	0.474336	0.396	0.139	5.01772e-26	5	zgc:158463
cemip1	3.63634e-30	0.116189	0.133	0.021	6.09777e-26	5	cemip
sfrp1b1	4.2692e-30	0.21761	0.162	0.03	7.15902e-26	5	sfrp1b
CU468917.12	6.57148e-30	0.274211	0.349	0.111	1.10197e-25	5	CU468917.1
fgl2a1	1.97128e-29	0.371391	0.338	0.116	3.30565e-25	5	fgl2a
mapk12a	3.5685e-29	0.102893	0.122	0.018	5.98402e-25	5	mapk12a
tpm31	4.30591e-29	0.283172	0.543	0.223	7.22059e-25	5	tpm3
atp5if1b1	6.68849e-29	0.216753	0.32	0.097	1.12159e-24	5	atp5if1b
si:ch211-253b8.5	6.71485e-29	0.103644	0.129	0.02	1.12601e-24	5	si:ch211-253b8.5
tuba8l21	1.36092e-28	0.204611	0.248	0.068	2.28213e-24	5	tuba8l2
ndufa4l2	2.23135e-28	0.421041	0.719	0.372	3.74174e-24	5	ndufa4l
rbp41	2.82587e-28	0.225068	0.5	0.202	4.73871e-24	5	rbp4
map1lc3a1	1.00254e-27	0.208787	0.306	0.092	1.68115e-23	5	map1lc3a
rbbp9	1.01366e-27	0.156544	0.176	0.037	1.6998e-23	5	rbbp9
tdh1	1.68603e-27	0.166405	0.187	0.041	2.8273e-23	5	tdh
glud1a2	1.93819e-27	0.22376	0.245	0.066	3.25014e-23	5	glud1a
dsc2l	1.97817e-27	0.227274	0.255	0.075	3.31719e-23	5	dsc2l
stau2	2.42888e-27	0.236087	0.313	0.099	4.07298e-23	5	stau2
cox8b2	2.59324e-27	0.152148	0.201	0.047	4.34861e-23	5	cox8b
eif4ebp3l1	2.87794e-27	0.288233	0.406	0.145	4.82603e-23	5	eif4ebp3l
caska	4.20242e-27	0.101013	0.115	0.017	7.04704e-23	5	caska
cav11	4.80756e-27	0.459193	0.576	0.294	8.0618e-23	5	cav1
nrp1a1	5.90696e-27	0.150896	0.223	0.058	9.90539e-23	5	nrp1a
zfp36l21	1.10579e-26	0.226563	0.299	0.091	1.8543e-22	5	zfp36l2
tefa	1.48234e-26	0.189799	0.291	0.087	2.48573e-22	5	tefa
glo1	2.21941e-26	0.261527	0.504	0.208	3.72173e-22	5	glo1
tpd52l2b	2.63484e-26	0.155484	0.201	0.048	4.41836e-22	5	tpd52l2b
gpx4a1	8.15327e-26	0.174445	0.284	0.086	1.36722e-21	5	gpx4a
pbx3b1	1.3699e-25	0.112166	0.126	0.022	2.29718e-21	5	pbx3b
bloc1s6	1.86643e-25	0.135526	0.14	0.026	3.12982e-21	5	bloc1s6
cast	2.5594e-25	0.21305	0.302	0.096	4.29186e-21	5	cast
sypl2a	4.58427e-25	0.190587	0.266	0.079	7.68737e-21	5	sypl2a
sfrp1a	5.24217e-25	0.115144	0.119	0.02	8.7906e-21	5	sfrp1a
hoxb8a	7.73106e-25	0.123201	0.119	0.02	1.29642e-20	5	hoxb8a
rhpn2	1.95846e-24	0.153788	0.198	0.051	3.28415e-20	5	rhpn2
p4hb1	2.15674e-24	0.26007	0.234	0.066	3.61664e-20	5	p4hb
syt11a1	9.19308e-24	0.140023	0.108	0.018	1.54159e-19	5	syt11a
si:ch211-214j24.101	3.57036e-23	0.188666	0.252	0.077	5.98713e-19	5	si:ch211-214j24.10
arl6ip11	3.70074e-23	0.204966	0.252	0.076	6.20577e-19	5	arl6ip1
nupr1a1	3.94636e-23	0.215319	0.356	0.131	6.61765e-19	5	nupr1a
arpc1b	4.50717e-23	0.112072	0.122	0.022	7.55808e-19	5	arpc1b
si:dkey-112e7.21	5.58124e-23	0.20192	0.367	0.138	9.35918e-19	5	si:dkey-112e7.2
lsm12b	6.42773e-23	0.18765	0.309	0.105	1.07787e-18	5	lsm12b
nfkbiaa1	6.93908e-23	0.426233	0.201	0.055	1.16361e-18	5	nfkbiaa
tomm51	1.31386e-22	0.252612	0.5	0.223	2.20321e-18	5	tomm5
CABZ01092746.12	1.52414e-22	0.22161	0.356	0.133	2.55584e-18	5	CABZ01092746.1
eif3s10	1.73504e-22	0.186638	0.291	0.098	2.90949e-18	5	eif3s10
traf4a	2.09132e-22	0.147267	0.158	0.037	3.50693e-18	5	traf4a
gpm6ab	2.40522e-22	0.141145	0.086	0.012	4.03332e-18	5	gpm6ab
rps27.21	2.85566e-22	0.26214	0.996	0.92	4.78866e-18	5	rps27.2
romo11	4.29778e-22	0.337376	0.831	0.548	7.20695e-18	5	romo1
cdc26	6.26842e-22	0.142324	0.169	0.041	1.05115e-17	5	cdc26
adh8b1	6.33665e-22	0.16604	0.245	0.076	1.06259e-17	5	adh8b
gsto2	8.02e-22	0.12145	0.151	0.034	1.34487e-17	5	gsto2
zgc:1101821	9.18099e-22	0.206307	0.313	0.11	1.53956e-17	5	zgc:110182
hopx	1.5414e-21	0.198813	0.302	0.104	2.58477e-17	5	hopx
csf1a	1.92687e-21	0.255165	0.259	0.09	3.23117e-17	5	csf1a
capns1a	2.68372e-21	0.208906	0.464	0.199	4.50034e-17	5	capns1a
tagapa	3.22696e-21	0.112828	0.065	0.007	5.41128e-17	5	tagapa
cyp27c1	5.00866e-21	0.14495	0.14	0.032	8.39902e-17	5	cyp27c1
rplp21	1.03849e-20	0.254931	0.986	0.912	1.74144e-16	5	rplp2
fth1a1	1.24948e-20	0.32593	0.543	0.251	2.09525e-16	5	fth1a
ube2e1	2.82944e-20	0.110102	0.162	0.04	4.74469e-16	5	ube2e1
sec61g1	3.87284e-20	0.340611	0.871	0.567	6.49437e-16	5	sec61g
fxyd12	5.33221e-20	0.247873	0.45	0.203	8.94158e-16	5	fxyd1
txn1	6.59223e-20	0.240856	0.165	0.044	1.10545e-15	5	txn
olfml3b1	1.06376e-19	0.21628	0.414	0.192	1.78381e-15	5	olfml3b
postnb	1.27459e-19	0.658503	0.475	0.273	2.13736e-15	5	postnb
capns1b1	1.62417e-19	0.261802	0.644	0.333	2.72357e-15	5	capns1b
id2a1	3.08285e-19	0.234236	0.237	0.079	5.16964e-15	5	id2a
sulf1	3.11302e-19	0.121001	0.133	0.031	5.22023e-15	5	sulf1
erh	3.65262e-19	0.196436	0.338	0.131	6.12507e-15	5	erh
si:ch211-217k17.71	4.36967e-19	0.149906	0.248	0.083	7.3275e-15	5	si:ch211-217k17.7
serpine31	6.85604e-19	0.215486	0.32	0.131	1.14969e-14	5	serpine3
chka2	7.68736e-19	0.102735	0.101	0.019	1.28909e-14	5	chka
eif3k1	7.76719e-19	0.177944	0.475	0.214	1.30248e-14	5	eif3k
smim15	1.43881e-18	0.107486	0.129	0.03	2.41275e-14	5	smim15
cxcl12b1	2.13769e-18	0.157919	0.151	0.039	3.58469e-14	5	cxcl12b
gpx1a	4.14531e-18	0.187062	0.252	0.088	6.95128e-14	5	gpx1a
gabarapa1	5.73416e-18	0.153491	0.273	0.099	9.61562e-14	5	gabarapa
si:dkey-188i13.10	7.1781e-18	0.154489	0.349	0.141	1.2037e-13	5	si:dkey-188i13.10
cavin2b1	7.59873e-18	0.278023	0.791	0.512	1.27423e-13	5	cavin2b
slc39a131	8.22611e-18	0.107486	0.115	0.025	1.37944e-13	5	slc39a13
csde1	9.88565e-18	0.171421	0.223	0.075	1.65772e-13	5	csde1
cgnl1	1.12035e-17	0.151692	0.263	0.099	1.87871e-13	5	cgnl1
efnb2a	1.59715e-17	0.131148	0.201	0.065	2.67827e-13	5	efnb2a
eno32	2.50733e-17	0.15655	0.252	0.089	4.20453e-13	5	eno3
anos1a	2.81298e-17	0.120265	0.133	0.034	4.71709e-13	5	anos1a
eif5a3	3.32252e-17	0.309045	0.597	0.322	5.57153e-13	5	eif5a
agrn1	3.41081e-17	0.147346	0.291	0.11	5.71959e-13	5	agrn
mtap	4.01091e-17	0.126679	0.129	0.032	6.72589e-13	5	mtap
dnmbp	4.30704e-17	0.132376	0.191	0.061	7.22247e-13	5	dnmbp
ybx11	4.36453e-17	0.231803	0.996	0.96	7.31888e-13	5	ybx1
mgp1	4.41768e-17	0.107678	0.086	0.015	7.40802e-13	5	mgp
afap1l1a	4.46541e-17	0.128753	0.147	0.04	7.48805e-13	5	afap1l1a
wbp2nl	4.69169e-17	0.126231	0.183	0.055	7.86749e-13	5	wbp2nl
selenow1	6.36954e-17	0.343939	0.568	0.329	1.06811e-12	5	selenow1
lxn2	9.31093e-17	0.299041	0.871	0.655	1.56135e-12	5	lxn
spink2.11	1.23439e-16	0.150521	0.122	0.029	2.06994e-12	5	spink2.1
slc15a2	1.24222e-16	0.147114	0.151	0.043	2.08308e-12	5	slc15a2
si:rp71-36a1.1	1.50873e-16	0.169075	0.338	0.151	2.52999e-12	5	si:rp71-36a1.1
si:ch73-46j18.51	1.59935e-16	0.236623	0.507	0.259	2.68195e-12	5	si:ch73-46j18.5
eif4ebp1	1.72559e-16	0.187441	0.263	0.101	2.89364e-12	5	eif4ebp1
golga7	2.39059e-16	0.125005	0.201	0.066	4.00878e-12	5	golga7
neil11	2.46707e-16	0.117635	0.176	0.055	4.13704e-12	5	neil1
zgc:153372	2.63259e-16	0.140932	0.212	0.075	4.41459e-12	5	zgc:153372
adam10a	3.02159e-16	0.140474	0.176	0.055	5.0669e-12	5	adam10a
adh51	3.08747e-16	0.264442	0.665	0.392	5.17738e-12	5	adh5
aldh1a22	3.19196e-16	0.397267	0.619	0.373	5.35259e-12	5	aldh1a2
rab3db	3.38003e-16	0.102557	0.137	0.037	5.66797e-12	5	rab3db
dnaja2a1	4.16039e-16	0.157636	0.288	0.114	6.97656e-12	5	dnaja2a
flot1b	4.75506e-16	0.117755	0.187	0.059	7.97376e-12	5	flot1b
anxa3b1	6.46731e-16	0.191161	0.263	0.101	1.0845e-11	5	anxa3b
rpl61	7.64764e-16	0.335132	0.745	0.46	1.28243e-11	5	rpl6
frzb	7.68238e-16	0.324598	0.248	0.099	1.28826e-11	5	frzb
klf11b1	9.549e-16	0.139632	0.281	0.109	1.60127e-11	5	klf11b
appa1	1.14916e-15	0.124325	0.237	0.086	1.92703e-11	5	appa
col1a1b1	1.28618e-15	0.422354	0.766	0.658	2.1568e-11	5	col1a1b
caprin1b	1.35594e-15	0.139562	0.241	0.089	2.27378e-11	5	caprin1b
pa2g4b1	1.35856e-15	0.120575	0.169	0.052	2.27817e-11	5	pa2g4b
cmbl	2.29942e-15	0.105114	0.144	0.04	3.8559e-11	5	cmbl
znf706	2.49191e-15	0.107706	0.173	0.054	4.17868e-11	5	znf706
ctdsp2	3.70317e-15	0.117162	0.284	0.112	6.20984e-11	5	ctdsp2
ywhaqa1	3.87402e-15	0.118789	0.259	0.099	6.49635e-11	5	ywhaqa
tenm31	4.01626e-15	0.11864	0.187	0.063	6.73486e-11	5	tenm3
rnf10	6.64822e-15	0.115406	0.223	0.081	1.11484e-10	5	rnf10
reep3a	7.77044e-15	0.135195	0.263	0.108	1.30303e-10	5	reep3a
akap8l	8.01782e-15	0.10797	0.133	0.036	1.34451e-10	5	akap8l
slc25a55a	9.84508e-15	0.123898	0.119	0.031	1.65092e-10	5	slc25a55a
sdad1	9.84931e-15	0.122977	0.162	0.05	1.65163e-10	5	sdad1
sap30l	1.08735e-14	0.103686	0.147	0.043	1.82338e-10	5	sap30l
tpt11	1.18012e-14	0.189324	1	0.973	1.97894e-10	5	tpt1
st13	1.28289e-14	0.111015	0.137	0.039	2.15127e-10	5	st13
elocb	1.37227e-14	0.121129	0.18	0.06	2.30115e-10	5	elocb
cldn5a1	1.5871e-14	0.397296	0.392	0.215	2.66141e-10	5	cldn5a
zgc:1583432	3.65406e-14	0.33487	0.331	0.154	6.1275e-10	5	zgc:158343
ccnd11	3.7293e-14	0.151836	0.205	0.077	6.25366e-10	5	ccnd1
rpl5a1	4.16566e-14	0.232416	0.932	0.814	6.9854e-10	5	rpl5a
si:dkey-239h2.31	4.25727e-14	0.10891	0.281	0.114	7.13901e-10	5	si:dkey-239h2.3
ppiab3	4.45769e-14	0.283191	0.737	0.437	7.47509e-10	5	ppiab
pfdn5	4.86306e-14	0.13098	0.27	0.111	8.15487e-10	5	pfdn5
cxcl18b2	5.62422e-14	0.316048	0.5	0.281	9.43126e-10	5	cxcl18b
psap2	5.68525e-14	0.138571	0.137	0.039	9.5336e-10	5	psap
angptl1a1	5.86224e-14	0.139862	0.18	0.063	9.8304e-10	5	angptl1a
si:ch211-140m22.7	6.00676e-14	0.126598	0.165	0.054	1.00727e-09	5	si:ch211-140m22.7
txndc9	6.62747e-14	0.128687	0.227	0.087	1.11136e-09	5	txndc9
epcam1	6.79094e-14	0.304413	0.119	0.032	1.13877e-09	5	epcam
atp5mc3b2	6.84931e-14	0.184958	0.54	0.269	1.14856e-09	5	atp5mc3b
ppib	6.98017e-14	0.263127	0.77	0.522	1.17051e-09	5	ppib
snrpf1	8.39343e-14	0.1699	0.273	0.114	1.40749e-09	5	snrpf
eif4a1b1	1.07679e-13	0.209504	0.651	0.38	1.80567e-09	5	eif4a1b
zgc:111986	1.29902e-13	0.12706	0.385	0.18	2.17833e-09	5	zgc:111986
b2m2	1.37237e-13	0.269397	0.788	0.528	2.30133e-09	5	b2m
cdc42	1.87755e-13	0.105929	0.324	0.14	3.14847e-09	5	cdc42
csrp1a	1.96899e-13	0.134749	0.255	0.105	3.30179e-09	5	csrp1a
reep52	2.08678e-13	0.139578	0.342	0.155	3.49933e-09	5	reep5
eif3ba1	2.1566e-13	0.153799	0.392	0.19	3.61641e-09	5	eif3ba
sparc2	2.23572e-13	0.216934	0.971	0.898	3.74908e-09	5	sparc
ghra1	2.87684e-13	0.113936	0.216	0.085	4.82417e-09	5	ghra
pdia31	3.16439e-13	0.214135	0.511	0.283	5.30636e-09	5	pdia3
ahnak1	3.18381e-13	0.225881	0.734	0.446	5.33893e-09	5	ahnak
syf2	3.51434e-13	0.108982	0.194	0.07	5.89319e-09	5	syf2
tmem2581	3.60397e-13	0.14463	0.349	0.164	6.0435e-09	5	tmem258
pinx1	3.78582e-13	0.100347	0.151	0.048	6.34844e-09	5	pinx1
F7 (1 of many)	3.8976e-13	0.115086	0.169	0.059	6.53588e-09	5	F7 (1 of many)
arpc2	4.16999e-13	0.158066	0.471	0.246	6.99266e-09	5	arpc2
ube2ib	4.33312e-13	0.125797	0.187	0.067	7.26621e-09	5	ube2ib
atp5if1a2	4.51709e-13	0.152182	0.173	0.059	7.57471e-09	5	atp5if1a
ssr41	4.98108e-13	0.144158	0.374	0.18	8.35277e-09	5	ssr4
scarb2a	5.08192e-13	0.178533	0.284	0.132	8.52187e-09	5	scarb2a
dkk3b2	9.46524e-13	0.174067	0.597	0.332	1.58723e-08	5	dkk3b
rpl191	1.12656e-12	0.133295	1	0.995	1.88912e-08	5	rpl19
cav2	1.38972e-12	0.180195	0.335	0.166	2.33042e-08	5	cav2
dhrs3a2	1.52095e-12	0.197272	0.248	0.111	2.55048e-08	5	dhrs3a
ptgs2a	1.56343e-12	0.165571	0.086	0.02	2.62172e-08	5	ptgs2a
rpl301	1.64765e-12	0.173388	0.996	0.97	2.76295e-08	5	rpl30
gabarapb1	1.65468e-12	0.138391	0.421	0.21	2.77473e-08	5	gabarapb
edf1	1.74457e-12	0.144748	0.496	0.259	2.92547e-08	5	edf1
CT027638.11	1.82799e-12	0.16197	0.241	0.099	3.06536e-08	5	CT027638.1
lasp11	1.84024e-12	0.125243	0.291	0.13	3.08589e-08	5	lasp1
ssr2	1.91761e-12	0.159176	0.511	0.274	3.21564e-08	5	ssr2
arhgef18a	2.18442e-12	0.13547	0.212	0.087	3.66306e-08	5	arhgef18a
anxa11a1	2.3116e-12	0.10224	0.212	0.083	3.87632e-08	5	anxa11a
cebpd1	2.61891e-12	0.128111	0.608	0.353	4.39165e-08	5	cebpd
tnfsf10	2.65711e-12	0.14905	0.295	0.141	4.4557e-08	5	tnfsf10
bccip2	2.67332e-12	0.102563	0.209	0.081	4.48289e-08	5	bccip
pik3r2	3.21897e-12	0.11304	0.198	0.076	5.39789e-08	5	pik3r2
psmb21	3.58391e-12	0.103756	0.234	0.096	6.00986e-08	5	psmb2
zgc:1935411	3.80929e-12	0.142422	0.342	0.162	6.3878e-08	5	zgc:193541
mdh21	4.24497e-12	0.113149	0.349	0.162	7.11839e-08	5	mdh2
ppdpfa	5.07118e-12	0.2041	0.284	0.139	8.50386e-08	5	ppdpfa
eif3ha1	5.20981e-12	0.132695	0.468	0.245	8.73633e-08	5	eif3ha
rps181	9.54734e-12	0.187503	0.975	0.935	1.60099e-07	5	rps18
cnbpb1	1.15635e-11	0.144663	0.5	0.269	1.93908e-07	5	cnbpb
atp1b1a1	1.23153e-11	0.121622	0.191	0.076	2.06515e-07	5	atp1b1a
kdelr2b1	1.23621e-11	0.118352	0.158	0.056	2.073e-07	5	kdelr2b
rplp01	1.25257e-11	0.150443	0.996	0.988	2.10044e-07	5	rplp0
lgals2a2	1.53999e-11	0.170652	0.162	0.058	2.5824e-07	5	lgals2a
eif3g1	1.94978e-11	0.214598	0.622	0.389	3.26959e-07	5	eif3g
stxbp6	2.01252e-11	0.141847	0.212	0.09	3.3748e-07	5	stxbp6
eif2s1b1	2.92956e-11	0.106251	0.396	0.201	4.91257e-07	5	eif2s1b
mtdha	6.20595e-11	0.123464	0.241	0.107	1.04068e-06	5	mtdha
mt-nd41	7.51343e-11	0.23204	0.629	0.364	1.25993e-06	5	mt-nd4
hephl1a	8.35981e-11	0.112795	0.216	0.095	1.40186e-06	5	hephl1a
ube2v21	1.4988e-10	0.105889	0.327	0.16	2.51334e-06	5	ube2v2
rpl13a1	1.58041e-10	0.138319	1	0.99	2.65019e-06	5	rpl13a
serpinb11	1.62929e-10	0.135963	0.374	0.194	2.73216e-06	5	serpinb1
jupa	1.71241e-10	0.134767	0.23	0.106	2.87154e-06	5	jupa
rab6ba	1.84106e-10	0.141955	0.299	0.154	3.08727e-06	5	rab6ba
gstr1	1.91286e-10	0.105343	0.414	0.22	3.20767e-06	5	gstr
si:ch211-250c4.4	2.12901e-10	0.161117	0.306	0.159	3.57014e-06	5	si:ch211-250c4.4
rps172	2.18389e-10	0.232591	0.745	0.476	3.66217e-06	5	rps17
pno11	2.63615e-10	0.112355	0.345	0.176	4.42056e-06	5	pno1
cox6b21	2.88234e-10	0.209212	0.586	0.338	4.8334e-06	5	cox6b2
rps261	3.19e-10	0.162815	0.978	0.965	5.34932e-06	5	rps26
atp5meb1	3.3781e-10	0.136075	0.388	0.206	5.66473e-06	5	atp5meb
rps27a1	4.7558e-10	0.12036	1	0.994	7.97499e-06	5	rps27a
rpl5b1	8.89929e-10	0.213297	0.903	0.739	1.49232e-05	5	rpl5b
tubb4b1	9.00492e-10	0.251354	0.583	0.348	1.51003e-05	5	tubb4b
srsf7a1	9.03851e-10	0.109381	0.158	0.061	1.51567e-05	5	srsf7a
sumo2b	9.10399e-10	0.109927	0.399	0.214	1.52665e-05	5	sumo2b
zgc:1103391	9.10743e-10	0.115614	0.133	0.048	1.52722e-05	5	zgc:110339
ube2v1	9.75748e-10	0.107967	0.23	0.105	1.63623e-05	5	ube2v1
selenof1	1.06043e-09	0.119514	0.223	0.101	1.77823e-05	5	selenof
serpinb1l1	1.15372e-09	0.114458	0.219	0.103	1.93467e-05	5	serpinb1l1
si:ch211-166a6.5	1.16153e-09	0.133165	0.227	0.109	1.94777e-05	5	si:ch211-166a6.5
btf31	1.55339e-09	0.183134	0.957	0.833	2.60487e-05	5	btf3
rpl42	1.97525e-09	0.228132	0.799	0.564	3.3123e-05	5	rpl4
aldh2.21	2.05707e-09	0.118636	0.23	0.107	3.44949e-05	5	aldh2.2
frmd8	2.22024e-09	0.165202	0.212	0.103	3.72313e-05	5	frmd8
si:ch73-138n13.1	2.40581e-09	0.126443	0.23	0.112	4.0343e-05	5	si:ch73-138n13.1
tmsb	2.64764e-09	0.200782	0.209	0.099	4.43983e-05	5	tmsb
rpsa1	2.76517e-09	0.14987	1	0.986	4.63691e-05	5	rpsa
txnipa1	3.00973e-09	0.146819	0.514	0.308	5.04702e-05	5	txnipa
gapdhs2	3.17768e-09	0.125344	0.45	0.257	5.32866e-05	5	gapdhs
eif3m1	3.43216e-09	0.183583	0.691	0.427	5.75538e-05	5	eif3m
rps151	4.78946e-09	0.136428	1	0.989	8.03145e-05	5	rps15
eef1a1l21	6.14289e-09	0.108935	1	0.998	0.00010301	5	eef1a1l2
si:ch1073-459j12.11	7.46025e-09	0.239105	0.414	0.272	0.000125101	5	si:ch1073-459j12.1
mt-nd51	7.58122e-09	0.149545	0.259	0.129	0.00012713	5	mt-nd5
rtn4a1	9.50215e-09	0.120356	0.216	0.1	0.000159342	5	rtn4a
ccl25b2	1.0163e-08	0.286552	0.295	0.171	0.000170424	5	ccl25b
rpl351	1.03113e-08	0.143229	0.989	0.986	0.000172911	5	rpl35
bnc21	1.41414e-08	0.129435	0.5	0.322	0.000237138	5	bnc2
podxl2	1.43387e-08	0.152299	0.874	0.575	0.000240446	5	podxl
eef1db1	1.47023e-08	0.177143	0.647	0.422	0.000246543	5	eef1db
fthl271	1.61508e-08	0.183628	0.547	0.33	0.000270833	5	fthl27
zgc:194659	1.62343e-08	0.133934	0.216	0.107	0.000272233	5	zgc:194659
cct72	1.65838e-08	0.107575	0.27	0.137	0.000278094	5	cct7
rpl23a1	1.68524e-08	0.147945	0.996	0.972	0.000282597	5	rpl23a
lama5	1.70153e-08	0.112126	0.151	0.062	0.00028533	5	lama5
zgc:1141811	1.76702e-08	0.154051	0.234	0.121	0.000296311	5	zgc:114181
rpl271	1.96224e-08	0.150012	0.993	0.967	0.000329047	5	rpl27
fbp1a	2.67226e-08	0.10424	0.23	0.118	0.000448111	5	fbp1a
rbms2b	2.87917e-08	0.104577	0.23	0.118	0.000482808	5	rbms2b
rpl181	3.09459e-08	0.1274	0.996	0.988	0.000518933	5	rpl18
si:dkey-151g10.61	3.30401e-08	0.128882	1	0.997	0.00055405	5	si:dkey-151g10.6
fam120c1	3.60089e-08	0.110243	0.191	0.088	0.000603833	5	fam120c
cct81	4.15882e-08	0.103278	0.216	0.106	0.000697393	5	cct8
ppiaa1	4.24939e-08	0.167735	0.982	0.924	0.00071258	5	ppiaa
sec61b	4.54973e-08	0.11583	0.223	0.109	0.000762944	5	sec61b
pabpc1a1	5.32244e-08	0.18789	0.705	0.482	0.000892519	5	pabpc1a
rpl121	6.61435e-08	0.115034	0.996	0.99	0.00110916	5	rpl12
rtn4b	6.76025e-08	0.104922	0.165	0.075	0.00113363	5	rtn4b
rps71	7.94993e-08	0.113401	0.996	0.995	0.00133312	5	rps7
si:ch73-234b20.5	1.7853e-07	0.123986	0.205	0.107	0.00299377	5	si:ch73-234b20.5
TXN1	2.62967e-07	0.109325	0.532	0.317	0.00440969	5	TXN
rpl341	3.29066e-07	0.148856	0.989	0.931	0.00551811	5	rpl34
rpl141	3.33629e-07	0.136423	0.996	0.982	0.00559463	5	rpl14
prdx5	3.41639e-07	0.108686	0.313	0.179	0.00572895	5	prdx5
ndrg2	4.03166e-07	0.129392	0.205	0.108	0.00676069	5	ndrg2
cebpb1	5.19091e-07	0.183246	0.435	0.274	0.00870463	5	cebpb
ch25h	5.27588e-07	0.154362	0.094	0.034	0.00884712	5	ch25h
ctsk1	1.19734e-06	0.10674	0.216	0.118	0.0200783	5	ctsk
tnfsf10l1	1.82625e-06	0.134754	0.237	0.138	0.0306244	5	tnfsf10l
nfkbiab1	1.90877e-06	0.102102	0.266	0.148	0.0320081	5	nfkbiab
rps281	2.31258e-06	0.127282	0.993	0.981	0.0387797	5	rps28
tmsb4x1	3.0702e-06	0.103981	1	0.992	0.0514843	5	tmsb4x
pnrc22	3.08897e-06	0.207295	0.705	0.544	0.051799	5	pnrc2
cyp2ad2	3.10728e-06	0.122346	0.09	0.036	0.052106	5	cyp2ad2
col12a1a1	3.17296e-06	0.133212	0.209	0.117	0.0532074	5	col12a1a
rpl361	3.28666e-06	0.131191	0.993	0.956	0.0551139	5	rpl36
ran2	3.53052e-06	0.149957	0.601	0.388	0.0592033	5	ran
pleca1	3.83667e-06	0.183185	0.446	0.318	0.0643371	5	pleca
serbp1a1	4.02662e-06	0.157756	0.888	0.664	0.0675224	5	serbp1a
cox4i12	4.13328e-06	0.112757	0.594	0.371	0.069311	5	cox4i1
naca1	5.00011e-06	0.12272	0.986	0.951	0.0838468	5	naca
rps15a1	1.04221e-05	0.10959	0.996	0.985	0.174768	5	rps15a
rpl81	1.14968e-05	0.103817	0.996	0.99	0.19279	5	rpl8
rpl291	1.24542e-05	0.152528	0.888	0.696	0.208844	5	rpl29
pim13	1.37631e-05	0.129026	0.317	0.197	0.230793	5	pim1
rps4x1	1.44256e-05	0.10883	0.993	0.974	0.241903	5	rps4x
rps8a1	1.59825e-05	0.109162	1	0.987	0.26801	5	rps8a
rpl381	1.70494e-05	0.12698	0.993	0.949	0.285902	5	rpl38
col6a31	1.7274e-05	0.128106	0.561	0.413	0.289668	5	col6a3
rpl221	2.05073e-05	0.114154	0.986	0.961	0.343887	5	rpl22
rps161	2.47065e-05	0.102457	1	0.99	0.414303	5	rps16
eif3f2	2.49872e-05	0.142748	0.712	0.495	0.419011	5	eif3f
cyp2p61	2.74705e-05	0.10128	0.266	0.168	0.460652	5	cyp2p6
rsl24d11	2.96687e-05	0.138513	0.831	0.65	0.497514	5	rsl24d1
rps241	4.5896e-05	0.101118	0.996	0.992	0.76963	5	rps24
rps27.11	4.85141e-05	0.100807	0.996	0.97	0.813533	5	rps27.1
col1a1a1	6.65111e-05	0.159306	0.665	0.625	1	5	col1a1a
plecb1	8.0949e-05	0.106456	0.241	0.154	1	5	plecb
si:ch211-15b10.6	0.000156138	0.121122	0.173	0.101	1	5	si:ch211-15b10.6
CR383676.12	0.000160549	0.137014	0.996	0.99	1	5	CR383676.1
rps61	0.000190924	0.104493	0.982	0.957	1	5	rps6
rpl36a1	0.000266705	0.103565	0.993	0.986	1	5	rpl36a
nme2b.13	0.000269474	0.122498	0.982	0.932	1	5	nme2b.1
ugt1b51	0.000494821	0.140769	0.302	0.221	1	5	ugt1b5
clu1	0.000847827	0.237904	0.187	0.122	1	5	clu
nsa21	0.00153267	0.103723	0.737	0.555	1	5	nsa2
eef1da1	0.00419414	0.104486	0.86	0.65	1	5	eef1da
mdka3	0.00563145	0.379025	0.32	0.268	1	5	mdka
