# Supplementary material for: Single-cell transcriptome reveals insights into the development and function of the zebrafish ovary
Source: eLife. 2022 May 19;11:e76014. doi: 10.7554/eLife.76014 (PMC9191896; doi:10.7554/eLife.76014)
Supplement: Supplementary file 6. [file elife-76014-supp6.xlsx]

## Sheet: All Theca Cells
	p_val	avg_logFC	pct.1	pct.2	p_val_adj	cluster	gene
pnp4a	2.06368e-182	2.16715	0.933	0	2.42358e-178	4	pnp4a
hsd17b1	4.86759e-173	1.43167	1	0.002	5.7165e-169	4	hsd17b1
notch3	3.33009e-163	1.79146	1	0.003	3.91086e-159	4	notch3
sb:cb81	2.80546e-143	0.659246	0.733	0	3.29474e-139	4	sb:cb81
slit2	2.81245e-143	0.757686	0.733	0	3.30295e-139	4	slit2
cdh1	2.0343e-140	1.48304	1	0.007	2.38908e-136	4	cdh1
myl9a	1.60152e-137	1.13641	0.867	0.003	1.88083e-133	4	myl9a
nrarpa	3.35766e-134	1.11831	0.8	0.002	3.94324e-130	4	nrarpa
bmpr2a	2.28277e-127	0.838207	0.933	0.007	2.68089e-123	4	bmpr2a
phlda2	2.08496e-125	2.38429	0.8	0.003	2.44858e-121	4	phlda2
htra1b	3.19571e-125	0.87205	0.8	0.003	3.75305e-121	4	htra1b
eya2	3.60516e-121	0.621874	0.733	0.002	4.2339e-117	4	eya2
smoc2	2.52896e-117	0.693147	0.6	0	2.97001e-113	4	smoc2
si:dkey-31f5.11	1.28498e-112	0.689728	0.733	0.003	1.50908e-108	4	si:dkey-31f5.11
emx2	2.85153e-105	0.75313	0.6	0.001	3.34884e-101	4	emx2
her2	2.18979e-104	1.58241	0.533	0	2.57169e-100	4	her2
si:dkey-225k4.1	2.18979e-104	0.725937	0.533	0	2.57169e-100	4	si:dkey-225k4.1
rbp5	2.19274e-104	0.929536	0.533	0	2.57516e-100	4	rbp5
cad	7.51531e-103	1.32982	0.933	0.013	8.82598e-99	4	cad
slc8a4b	3.936e-100	0.584368	0.667	0.003	4.62244e-96	4	slc8a4b
bambia	4.50047e-98	0.990791	0.733	0.006	5.28535e-94	4	bambia
gmnn	5.53804e-96	1.21695	0.6	0.002	6.50387e-92	4	gmnn
sept9a	1.08928e-92	0.723657	0.533	0.001	1.27925e-88	4	sept9a
sulf2b	1.7868e-91	0.81831	0.467	0	2.09842e-87	4	sulf2b
slc7a10a	1.78734e-91	0.659246	0.467	0	2.09905e-87	4	slc7a10a
wnt4a	1.78774e-91	0.725937	0.467	0	2.09952e-87	4	wnt4a
gstt1b	1.37956e-89	1.16567	0.8	0.01	1.62015e-85	4	gstt1b
col4a5	4.74041e-86	1.29802	0.933	0.018	5.56714e-82	4	col4a5
nid1b	1.08689e-83	1.37262	0.612	0.03	1.27645e-79	3	nid1b
lamb2l	2.00503e-83	0.467723	0.533	0.002	2.35471e-79	4	lamb2l
ano5b	2.20848e-81	0.617328	0.667	0.007	2.59364e-77	4	ano5b
nhsl2	4.6454e-80	0.548905	0.467	0.001	5.45556e-76	4	nhsl2
cyp2x12.1	1.37601e-78	0.382992	0.4	0	1.61599e-74	4	cyp2x12.1
si:ch73-217n20.1	1.37601e-78	0.382992	0.4	0	1.61599e-74	4	si:ch73-217n20.1
rerglb	1.37694e-78	0.427444	0.4	0	1.61707e-74	4	rerglb
slc7a11	1.37694e-78	0.427444	0.4	0	1.61707e-74	4	slc7a11
plekhg4	6.4268e-78	0.981832	0.8	0.014	7.54764e-74	4	plekhg4
srpra	1.84568e-73	1.11197	1	0.029	2.16757e-69	4	srpra
marcksl1b1	3.28165e-72	1.91661	0.8	0.016	3.85397e-68	4	marcksl1b
si:dkey-73n10.1	4.13893e-71	0.722518	0.467	0.002	4.86076e-67	4	si:dkey-73n10.1
COLEC10	4.83931e-71	0.65469	0.467	0.002	5.68329e-67	4	COLEC10
trib3	8.15973e-71	0.685188	0.467	0.002	9.58279e-67	4	trib3
bcam	4.33247e-69	0.713458	0.533	0.005	5.08806e-65	4	bcam
gmps	9.90716e-69	1.30339	0.933	0.027	1.1635e-64	4	gmps
star	1.98726e-67	1.58944	0.778	0.19	2.33384e-63	1	star
rdh8a	2.371e-67	0.381851	0.4	0.001	2.7845e-63	4	rdh8a
cyp19a1a	2.86338e-67	2.89754	0.871	0.209	3.36275e-63	3	cyp19a1a
dap1b	1.49311e-66	2.24598	1	0.035	1.75351e-62	4	dap1b
notch1b	1.00704e-65	0.336472	0.333	0	1.18267e-61	4	notch1b
her4.2.1	1.00765e-65	0.510826	0.333	0	1.18338e-61	4	her4.2.1
gsdf	1.97119e-65	2.70993	1	0.037	2.31497e-61	4	gsdf
slit3	5.66612e-64	0.421752	0.533	0.006	6.65429e-60	4	slit3
metrn	6.78162e-64	0.665008	0.667	0.011	7.96433e-60	4	metrn
slc43a3b	9.36512e-64	0.610549	0.533	0.006	1.09984e-59	4	slc43a3b
hs3st3b1b	1.15778e-63	0.578696	0.467	0.003	1.35969e-59	4	hs3st3b1b
sparc	2.19823e-62	1.43079	0.759	0.129	2.58161e-58	3	sparc
mt-co1	1.96033e-59	0.55186	1	1	2.30221e-55	1	mt-co1
ccdc3a	6.39676e-59	0.425164	0.4	0.002	7.51236e-55	4	ccdc3a
efna1b	7.08408e-59	0.507407	0.4	0.002	8.31954e-55	4	efna1b
tmsb1	9.1436e-59	0.634442	0.533	0.007	1.07382e-54	4	tmsb1
si:ch211-156j16.1	1.21501e-57	0.608299	0.467	0.005	1.42691e-53	4	si:ch211-156j16.1
si:ch211-222l21.1	1.59915e-57	1.46314	0.75	0.145	1.87804e-53	3	si:ch211-222l21.1
ivns1abpa	3.93338e-57	1.95022	1	0.046	4.61936e-53	4	ivns1abpa
col1a1b	2.05464e-56	0.967361	0.517	0.043	2.41297e-52	3	col1a1b
mt-co2	4.55376e-55	0.414288	1	1	5.34794e-51	1	mt-co2
smad1	5.4226e-55	0.49722	0.6	0.011	6.3683e-51	4	smad1
si:busm1-57f23.1	8.11447e-55	0.548905	0.333	0.001	9.52963e-51	4	si:busm1-57f23.1
tmem88b	8.12791e-53	0.881912	0.431	0.026	9.54541e-49	3	tmem88b
fbln5	2.03796e-52	0.810351	0.4	0.003	2.39338e-48	4	fbln5
hey2	2.32884e-52	0.465448	0.4	0.003	2.73499e-48	4	hey2
limch1b	2.65483e-52	0.333053	0.4	0.003	3.11784e-48	4	limch1b
col4a6	5.55324e-49	0.736228	0.533	0.01	6.52172e-45	4	col4a6
tagln2	7.42225e-47	0.422888	0.333	0.002	8.7167e-43	4	tagln2
ponzr1	1.11111e-46	1.62637	1	0.056	1.30489e-42	4	ponzr1
fxyd6l	2.57617e-45	1.25245	0.667	0.022	3.02546e-41	4	fxyd6l
impdh1b	2.73533e-45	0.487136	0.533	0.011	3.21237e-41	4	impdh1b
vwde	5.24539e-44	0.542249	0.397	0.03	6.16019e-40	3	vwde
glulb	7.31538e-44	2.31281	1	0.065	8.59119e-40	4	glulb
ramp2	6.85699e-43	0.421752	0.4	0.006	8.05285e-39	4	ramp2
slc35f2	8.54115e-43	0.646767	0.4	0.006	1.00307e-38	4	slc35f2
timp2b	8.54115e-43	0.420618	0.4	0.006	1.00307e-38	4	timp2b
foxp4	9.09272e-43	0.711206	0.467	0.009	1.06785e-38	4	foxp4
mt-cyb	1.37167e-42	0.465719	1	0.994	1.61089e-38	1	mt-cyb
ptprfb	1.49858e-42	0.676169	0.467	0.009	1.75994e-38	4	ptprfb
ppargc1b	1.86122e-42	0.64339	0.467	0.009	2.18581e-38	4	ppargc1b
zgc:194839	2.11997e-42	0.335331	0.267	0.001	2.48969e-38	4	zgc:194839
her4.2	2.12007e-42	0.468863	0.267	0.001	2.48981e-38	4	her4.2
enpp6	2.23625e-42	0.286541	0.267	0.001	2.62625e-38	4	enpp6
ptn	2.35831e-42	0.235248	0.267	0.001	2.7696e-38	4	ptn
frmd4bb	2.35831e-42	0.235248	0.267	0.001	2.7696e-38	4	frmd4bb
si:ch211-250c4.4	2.61687e-42	0.414965	0.467	0.009	3.07325e-38	4	si:ch211-250c4.4
sult1st6	2.92341e-42	0.234108	0.267	0.001	3.43325e-38	4	sult1st6
gatm	5.34091e-42	0.950441	0.7	0.262	6.27237e-38	1	gatm
chka	3.28435e-41	1.01069	0.667	0.025	3.85714e-37	4	chka
rgcc	4.06829e-41	0.837076	0.333	0.003	4.7778e-37	4	rgcc
hpgd	6.71417e-41	0.571931	0.333	0.003	7.88512e-37	4	hpgd
CU861453.1	9.95927e-40	0.414965	0.467	0.01	1.16962e-35	4	CU861453.1
dag1	1.55244e-39	1.17904	0.8	0.041	1.82319e-35	4	dag1
ston2	3.84209e-39	0.329646	0.4	0.007	4.51214e-35	4	ston2
emilin1a	8.99822e-39	0.430417	0.319	0.018	1.05675e-34	3	emilin1a
tnfrsf19	1.4763e-38	0.359659	0.371	0.031	1.73376e-34	3	tnfrsf19
mxra8a	1.96749e-38	0.872085	0.578	0.115	2.31062e-34	3	mxra8a
SERP1	3.95533e-38	0.400469	1	1	4.64514e-34	1	SERP1
colec11	2.95715e-37	0.765657	0.328	0.023	3.47288e-33	3	colec11
wnt9b	1.28106e-36	0.378436	0.333	0.005	1.50447e-32	4	wnt9b
sdk1a	1.48527e-36	0.378436	0.333	0.005	1.74431e-32	4	sdk1a
si:dkey-194e6.1	1.79054e-36	0.419485	0.333	0.005	2.10281e-32	4	si:dkey-194e6.1
uck2a	3.05398e-36	0.860403	0.6	0.023	3.5866e-32	4	uck2a
serpinh1a	8.50216e-36	0.450783	0.533	0.017	9.98494e-32	4	serpinh1a
tspan18a	2.08654e-35	0.380712	0.267	0.002	2.45044e-31	4	tspan18a
si:ch211-137i24.10	2.28057e-35	0.285402	0.267	0.002	2.6783e-31	4	si:ch211-137i24.10
tnika	2.98067e-35	0.331916	0.267	0.002	3.5005e-31	4	tnika
fosb1	4.37908e-33	0.669396	0.952	0.801	5.14279e-29	1	fosb
hprt1	5.69855e-33	0.558538	0.467	0.014	6.69238e-29	4	hprt1
atp1a1a.1	7.8553e-33	1.26605	0.667	0.034	9.22527e-29	4	atp1a1a.1
angptl4	7.89433e-33	1.3675	0.6	0.026	9.2711e-29	4	angptl4
col5a1	1.77929e-32	0.663527	0.388	0.048	2.0896e-28	3	col5a1
pnp5a1	1.87376e-32	0.868643	0.6	0.026	2.20054e-28	4	pnp5a
pdgfra1	3.05442e-32	1.22486	0.733	0.043	3.58711e-28	4	pdgfra
nrp2a	4.53596e-31	0.54861	0.667	0.035	5.32703e-27	4	nrp2a
pmp22a	8.86055e-31	1.04511	0.853	0.489	1.04058e-26	3	pmp22a
podxl	1.13442e-30	0.737088	0.302	0.027	1.33226e-26	3	podxl
klhl41b	2.62198e-30	0.23297	0.267	0.003	3.07925e-26	4	klhl41b
rpl19	3.00129e-30	0.177707	1	1	3.52471e-26	0	rpl19
tmem204	3.05532e-30	0.231833	0.267	0.003	3.58817e-26	4	tmem204
celsr1a	7.82643e-30	0.280856	0.333	0.007	9.19136e-26	4	celsr1a
sort1a	2.48731e-29	0.600503	0.733	0.047	2.9211e-25	4	sort1a
zmp:0000000711	2.74021e-29	0.4452	0.533	0.023	3.2181e-25	4	zmp:0000000711
krt18a.11	5.41621e-29	1.2675	1	0.091	6.3608e-25	4	krt18a.1
aqp12	7.56433e-29	0.593064	0.879	0.608	8.88355e-25	1	aqp12
tnfaip6	8.31801e-29	0.618777	0.56	0.145	9.76867e-25	3	tnfaip6
tob1b	9.05274e-29	0.708083	0.85	0.615	1.06315e-24	1	tob1b
hsp70.3	1.20819e-28	0.526053	0.981	0.95	1.4189e-24	1	hsp70.3
slc7a3a	1.98484e-28	0.660757	0.667	0.039	2.33099e-24	4	slc7a3a
gch1	2.84122e-28	0.362999	0.382	0.076	3.33673e-24	1	gch1
fstl3	6.77801e-28	0.642264	0.276	0.025	7.9601e-24	3	fstl3
ubb	1.31494e-27	0.692573	0.894	0.664	1.54426e-23	1	ubb
zfhx3	1.99998e-27	0.589378	0.467	0.018	2.34877e-23	4	zfhx3
cygb1	2.2167e-27	0.530826	0.333	0.008	2.60329e-23	4	cygb1
gramd1a	4.69419e-27	0.679108	0.778	0.459	5.51286e-23	1	gramd1a
mycb	7.47592e-27	0.682603	0.814	0.654	8.77971e-23	0	mycb
mt-co3	7.71477e-27	0.347979	1	1	9.06023e-23	1	mt-co3
si:ch73-193i22.1	1.35267e-26	0.283126	0.267	0.005	1.58857e-22	4	si:ch73-193i22.1
gstt1a	1.35267e-26	0.283126	0.267	0.005	1.58857e-22	4	gstt1a
btr16	1.54471e-26	0.231833	0.267	0.005	1.81411e-22	4	btr16
insig1	1.82641e-26	0.278591	0.267	0.005	2.14494e-22	4	insig1
glula	1.95561e-26	0.580102	0.537	0.201	2.29667e-22	0	glula
hsp70.2	2.85197e-26	0.654815	0.976	0.863	3.34935e-22	1	hsp70.2
lama51	4.19538e-26	0.85849	0.8	0.064	4.92705e-22	4	lama5
hsp70.1	5.75148e-26	0.671587	0.932	0.797	6.75453e-22	1	hsp70.1
bsg	6.70133e-26	0.890826	0.569	0.164	7.87004e-22	3	bsg
znf536	1.09039e-25	0.669248	0.733	0.054	1.28055e-21	4	znf536
CR751602.2	1.38248e-25	0.696901	0.302	0.037	1.62359e-21	3	CR751602.2
c6.1	1.64525e-25	0.48614	0.207	0.012	1.93218e-21	3	c6.1
marcksl1a1	2.30981e-25	1.11562	0.867	0.075	2.71264e-21	4	marcksl1a
nrp2b	4.45247e-25	0.263099	0.259	0.025	5.22898e-21	3	nrp2b
junba1	5.09047e-25	0.825247	0.966	0.852	5.97825e-21	3	junba
zgc:123010	8.29914e-25	0.478257	0.533	0.029	9.74651e-21	4	zgc:123010
hsp90aa1.2	1.01132e-24	0.904929	0.821	0.553	1.1877e-20	1	hsp90aa1.2
ngdn	1.28052e-24	0.602324	0.345	0.057	1.50384e-20	3	ngdn
ampd2b	1.63645e-24	0.320617	0.4	0.015	1.92184e-20	4	ampd2b
slc29a1a	2.12783e-24	0.486115	0.293	0.037	2.49892e-20	3	slc29a1a
phkg1a	2.91499e-24	0.234108	0.2	0.002	3.42336e-20	4	phkg1a
zgc:92275	2.91499e-24	0.234108	0.2	0.002	3.42336e-20	4	zgc:92275
adarb1a	2.91499e-24	0.234108	0.2	0.002	3.42336e-20	4	adarb1a
lmbrd2a	3.15756e-24	0.180041	0.2	0.002	3.70824e-20	4	lmbrd2a
tuft1a	3.15756e-24	0.180041	0.2	0.002	3.70824e-20	4	tuft1a
slc7a2	3.15756e-24	0.180041	0.2	0.002	3.70824e-20	4	slc7a2
notum1b	3.28921e-24	0.366843	0.181	0.008	3.86285e-20	3	notum1b
rps13	3.53354e-24	0.177698	1	1	4.1498e-20	2	rps13
dcn	6.96392e-24	0.256413	0.216	0.015	8.17842e-20	3	dcn
kidins220a1	7.82055e-24	0.632254	0.6	0.039	9.18445e-20	4	kidins220a
appa1	1.03286e-23	1.32022	1	0.137	1.21299e-19	4	appa
atad2	1.49821e-23	0.229563	0.267	0.006	1.75949e-19	4	atad2
bean1	1.88497e-23	0.314643	0.338	0.072	2.2137e-19	1	bean1
cyth1a.1	2.21247e-23	0.368261	0.333	0.01	2.59832e-19	4	cyth1a.1
cd81a	2.63022e-23	0.771149	0.552	0.181	3.08892e-19	3	cd81a
gnl3	3.13936e-23	0.382794	0.533	0.03	3.68686e-19	4	gnl3
col18a1a	3.94504e-23	0.947936	0.802	0.523	4.63305e-19	3	col18a1a
aif1l	1.08108e-22	0.558974	0.533	0.031	1.26962e-18	4	aif1l
hsd11b2	2.47386e-22	0.488414	0.155	0.005	2.9053e-18	3	hsd11b2
rps121	3.09429e-22	0.180857	1	1	3.63393e-18	2	rps12
rpl181	3.39143e-22	0.169862	1	1	3.9829e-18	2	rpl18
egfra1	4.19182e-22	0.526893	0.6	0.042	4.92288e-18	4	egfra
sos1	4.39051e-22	0.316133	0.4	0.017	5.15622e-18	4	sos1
socs3b	4.40773e-22	0.874059	0.353	0.068	5.17643e-18	3	socs3b
hsd3b7	4.76146e-22	0.484209	0.198	0.014	5.59186e-18	3	hsd3b7
hsp90ab1	4.8553e-22	0.207309	1	1	5.70207e-18	0	hsp90ab1
rps15a	4.98646e-22	0.173677	1	1	5.8561e-18	2	rps15a
enc1	5.20661e-22	0.514086	0.6	0.041	6.11464e-18	4	enc1
krt81	6.27212e-22	0.679002	0.778	0.472	7.36597e-18	1	krt8
rplp0	9.53442e-22	0.169452	1	1	1.11972e-17	0	rplp0
aebp1	1.08897e-21	0.19832	0.207	0.017	1.27889e-17	3	aebp1
tpm4a	1.397e-21	0.667194	0.533	0.033	1.64064e-17	4	tpm4a
rps2	1.62222e-21	0.144924	1	1	1.90514e-17	0	rps2
ybx11	1.71606e-21	0.35015	1	0.994	2.01535e-17	3	ybx1
tp53i11b	2.16975e-21	0.329646	0.267	0.007	2.54815e-17	4	tp53i11b
CABZ01084501.3	2.61826e-21	0.896211	0.531	0.221	3.07489e-17	1	CABZ01084501.3
myh10	2.6643e-21	0.389366	0.467	0.025	3.12895e-17	4	myh10
id3	2.90815e-21	0.89723	0.6	0.045	3.41533e-17	4	id3
jpt1b	3.83663e-21	0.635497	0.328	0.058	4.50574e-17	3	jpt1b
lxn	5.4665e-21	0.64707	0.336	0.065	6.41986e-17	3	lxn
antxr1c1	6.89037e-21	0.624007	0.6	0.043	8.09206e-17	4	antxr1c
rpl10a	7.13552e-21	0.136328	1	1	8.37996e-17	0	rpl10a
fndc3ba	7.21076e-21	0.418824	0.6	0.045	8.46831e-17	4	fndc3ba
slc51a	8.6348e-21	0.287566	0.353	0.091	1.01407e-16	1	slc51a
higd1a	1.01952e-20	0.838326	0.672	0.338	1.19733e-16	3	higd1a
fibina	1.16798e-20	0.269784	0.25	0.031	1.37167e-16	3	fibina
rps14	1.22269e-20	0.15616	1	1	1.43592e-16	2	rps14
mat1a	1.8061e-20	0.253379	0.246	0.039	2.12109e-16	1	mat1a
polr1c	2.27091e-20	0.319494	0.333	0.013	2.66695e-16	4	polr1c
rpl12	2.46478e-20	0.145911	1	1	2.89464e-16	2	rpl12
ccdc80	2.64918e-20	0.23297	0.2	0.003	3.11119e-16	4	ccdc80
hey1	2.64918e-20	0.23297	0.2	0.003	3.11119e-16	4	hey1
igf2b	2.64918e-20	0.23297	0.2	0.003	3.11119e-16	4	igf2b
gmds	2.64995e-20	0.463178	0.2	0.003	3.1121e-16	4	gmds
kank4	2.71468e-20	0.362653	0.4	0.019	3.18812e-16	4	kank4
slc4a4a	2.7623e-20	0.500794	0.783	0.52	3.24404e-16	1	slc4a4a
znf1137.1	2.92698e-20	0.178903	0.2	0.003	3.43745e-16	4	znf1137.1
trpm6	2.92698e-20	0.178903	0.2	0.003	3.43745e-16	4	trpm6
abca1b	2.92698e-20	0.178903	0.2	0.003	3.43745e-16	4	abca1b
ptk2aa	2.92698e-20	0.178903	0.2	0.003	3.43745e-16	4	ptk2aa
arhgef1a	2.92698e-20	0.178903	0.2	0.003	3.43745e-16	4	arhgef1a
itga2.3	2.92698e-20	0.178903	0.2	0.003	3.43745e-16	4	itga2.3
eif4ebp1	3.78865e-20	0.381899	0.966	0.893	4.4494e-16	1	eif4ebp1
rpl27	3.96286e-20	0.164326	1	1	4.65399e-16	2	rpl27
rps3a	3.96954e-20	0.135403	1	1	4.66183e-16	0	rps3a
rplp2l	1.0829e-19	0.19593	1	1	1.27175e-15	2	rplp2l
smad2	1.29825e-19	0.449932	0.533	0.037	1.52467e-15	4	smad2
plcg2	1.32451e-19	0.370395	0.377	0.115	1.5555e-15	1	plcg2
rpl13a	1.34599e-19	0.138201	1	1	1.58073e-15	2	rpl13a
ets2	1.38249e-19	0.615421	0.628	0.323	1.6236e-15	1	ets2
zgc:162730	1.47869e-19	1.37325	0.353	0.08	1.73657e-15	3	zgc:162730
rpl31	1.78494e-19	0.165952	1	1	2.09623e-15	2	rpl31
dock9b	2.39412e-19	0.325121	0.267	0.008	2.81165e-15	4	dock9b
aste1a	2.51559e-19	0.644093	0.42	0.139	2.95431e-15	1	aste1a
cavin2b1	2.57036e-19	0.463701	0.533	0.037	3.01863e-15	4	cavin2b
akap12b1	2.66524e-19	0.822772	0.733	0.074	3.13006e-15	4	akap12b
plpp1a	3.00517e-19	0.635673	0.25	0.036	3.52927e-15	3	plpp1a
midn	3.1041e-19	0.776004	0.623	0.335	3.64546e-15	1	midn
ccnd2a	3.99162e-19	0.36006	0.233	0.03	4.68776e-15	3	ccnd2a
prdx2	4.50618e-19	0.55378	0.758	0.577	5.29206e-15	1	prdx2
timp2a	5.02088e-19	0.447177	0.653	0.369	5.89652e-15	0	timp2a
fbxo25	5.44017e-19	0.312782	0.333	0.014	6.38894e-15	4	fbxo25
zgc:162608	6.06734e-19	0.620953	0.353	0.101	7.12549e-15	1	zgc:162608
f101	7.63376e-19	0.41774	0.533	0.039	8.96509e-15	4	f10
rps16	1.02747e-18	0.152323	1	1	1.20666e-14	2	rps16
fdx1b	1.08044e-18	0.424214	0.986	0.966	1.26887e-14	1	fdx1b
rps5	1.11281e-18	0.125289	1	1	1.30688e-14	0	rps5
rpl8	1.31985e-18	0.136911	1	1	1.55004e-14	0	rpl8
tbx2a	1.49529e-18	0.21847	0.164	0.012	1.75607e-14	3	tbx2a
tspan31	1.54839e-18	0.444576	0.667	0.064	1.81843e-14	4	tspan31
tjp2b	1.56142e-18	0.501102	0.488	0.197	1.83373e-14	1	tjp2b
vasnb	1.63508e-18	0.313898	0.4	0.022	1.92024e-14	4	vasnb
btg1	1.66251e-18	0.487703	0.889	0.727	1.95245e-14	1	btg1
ivns1abpb	1.84587e-18	0.552293	0.233	0.032	2.16779e-14	3	ivns1abpb
rpl18a1	1.98743e-18	0.148958	1	1	2.33404e-14	2	rpl18a
gtf2b	2.09452e-18	0.354747	0.304	0.073	2.45981e-14	1	gtf2b
eef1g	2.4211e-18	0.176867	1	1	2.84334e-14	0	eef1g
ndrg3a	3.13413e-18	0.450573	0.328	0.072	3.68072e-14	3	ndrg3a
rps7	3.54474e-18	0.132351	1	1	4.16294e-14	0	rps7
srgap3	3.57381e-18	0.26883	0.29	0.067	4.19708e-14	1	srgap3
rpl33	3.86329e-18	0.194218	1	0.999	4.53705e-14	2	rpl3
cd63	4.91726e-18	0.472935	0.531	0.237	5.77482e-14	1	cd63
krt91	5.03965e-18	0.730043	0.894	0.842	5.91857e-14	1	krt91
jam2a	5.91908e-18	0.328565	0.4	0.022	6.95136e-14	4	jam2a
slc12a2	6.57879e-18	0.341622	0.467	0.031	7.72613e-14	4	slc12a2
jdp2b	7.26536e-18	0.485074	0.853	0.706	8.53243e-14	0	jdp2b
hsp70l	7.50739e-18	0.783948	0.787	0.531	8.81668e-14	1	hsp70l
col12a1a	7.60346e-18	0.500604	0.267	0.009	8.9295e-14	4	col12a1a
tmem176	7.95486e-18	0.239469	0.19	0.019	9.34219e-14	3	tmem176
rpl35	8.06822e-18	0.172502	1	1	9.47532e-14	2	rpl35
rpl7a1	8.37939e-18	0.141959	1	1	9.84076e-14	2	rpl7a
lpar1	8.81776e-18	0.312782	0.4	0.023	1.03556e-13	4	lpar1
nrxn1a	8.92592e-18	0.293592	0.198	0.022	1.04826e-13	3	nrxn1a
tdh	8.93616e-18	0.573679	0.507	0.227	1.04946e-13	1	tdh
ADGRL3	9.80362e-18	0.350423	0.467	0.032	1.15134e-13	4	ADGRL3
rps8a1	1.0049e-17	0.159558	1	1	1.18016e-13	2	rps8a
faua	1.13335e-17	0.129631	1	1	1.33101e-13	0	faua
calr	1.1782e-17	0.319336	0.319	0.068	1.38368e-13	3	calr
cited4a	1.28528e-17	0.820272	0.633	0.387	1.50943e-13	1	cited4a
rpl30	1.34315e-17	0.161996	1	1	1.57739e-13	2	rpl30
rpl231	1.44041e-17	0.143402	1	1	1.69161e-13	2	rpl23
zgc:1748631	1.44142e-17	1.03217	0.8	0.103	1.69281e-13	4	zgc:174863
cct5	1.52718e-17	0.585404	0.491	0.16	1.79352e-13	3	cct5
myo1ea	1.96238e-17	0.230697	0.2	0.005	2.30462e-13	4	myo1ea
BX511111.3	2.01814e-17	0.177766	0.2	0.005	2.37011e-13	4	BX511111.3
si:ch211-268b14.2	2.19864e-17	0.17663	0.2	0.005	2.58208e-13	4	si:ch211-268b14.2
2020-06-01	2.43704e-17	0.381618	1	0.952	2.86206e-13	1	jun
plxnc1	2.92818e-17	0.226342	0.242	0.048	3.43886e-13	1	plxnc1
greb1	3.13142e-17	0.580257	0.533	0.043	3.67753e-13	4	greb1
cdh11	4.09604e-17	0.162118	0.138	0.008	4.81039e-13	3	cdh11
rpl11	4.80967e-17	0.13976	1	1	5.64848e-13	2	rpl11
UBB	4.94026e-17	0.569003	0.715	0.462	5.80184e-13	1	UBB
frya	6.29706e-17	0.350786	0.42	0.158	7.39527e-13	1	frya
rpl7a	6.4383e-17	0.120862	1	1	7.56114e-13	0	rpl7a
btg2	8.59471e-17	0.328401	0.975	0.849	1.00936e-12	0	btg2
rpl23	1.01252e-16	0.110004	1	1	1.18911e-12	0	rpl23
rpl17	1.45712e-16	0.137127	1	1	1.71124e-12	2	rpl17
rps10	1.60525e-16	0.13005	1	1	1.88521e-12	2	rps10
gdpd5b	1.79032e-16	0.310555	0.4	0.025	2.10255e-12	4	gdpd5b
myl9b	1.889e-16	0.650486	0.431	0.141	2.21844e-12	3	myl9b
krt94	2.03308e-16	0.273513	0.121	0.005	2.38765e-12	3	krt94
tln1	2.06736e-16	0.650614	0.6	0.059	2.42791e-12	4	tln1
rhbdf1a	2.0947e-16	0.276331	0.267	0.01	2.46002e-12	4	rhbdf1a
cahz	2.4344e-16	0.386192	0.112	0.004	2.85897e-12	3	cahz
rps25	2.44619e-16	0.167934	1	1	2.87281e-12	2	rps25
ism1	2.69866e-16	0.155201	0.112	0.004	3.16931e-12	3	ism1
tanc1b	2.72608e-16	0.22391	0.267	0.01	3.2015e-12	4	tanc1b
si:ch211-114c12.2	2.95817e-16	0.317252	0.267	0.01	3.47408e-12	4	si:ch211-114c12.2
rps9	3.30562e-16	0.137213	1	1	3.88212e-12	2	rps9
sdc4	3.61827e-16	1.09689	0.603	0.328	4.24929e-12	3	sdc4
CABZ01030107.1	3.79288e-16	0.191306	0.103	0.003	4.45436e-12	3	CABZ01030107.1
rrp15	4.08466e-16	0.217168	0.267	0.01	4.79702e-12	4	rrp15
eif4ebp3l	4.34857e-16	0.404823	0.467	0.034	5.10696e-12	4	eif4ebp3l
btf3	4.77626e-16	0.179134	1	0.996	5.60924e-12	0	btf3
wls	4.99498e-16	0.476907	0.293	0.065	5.8661e-12	3	wls
si:ch211-200p22.4	5.23864e-16	0.495619	0.533	0.049	6.15226e-12	4	si:ch211-200p22.4
rpl7	5.2655e-16	0.143015	1	1	6.1838e-12	2	rpl7
man1b1b	6.90919e-16	0.309444	0.4	0.026	8.11415e-12	4	man1b1b
rmdn1	7.18423e-16	0.333985	0.467	0.035	8.43716e-12	4	rmdn1
zfp36l1b	7.47535e-16	0.568835	0.536	0.266	8.77905e-12	1	zfp36l1b
rarres3l	8.26891e-16	0.266062	0.246	0.056	9.71101e-12	1	rarres3l
cyba	8.28797e-16	0.338204	0.459	0.197	9.7334e-12	1	cyba
rpl35a	8.49027e-16	0.165732	1	1	9.97097e-12	2	rpl35a
gstm.1	8.52192e-16	0.843236	0.8	0.107	1.00081e-11	4	gstm.1
rpl24	1.16545e-15	0.108972	1	1	1.36871e-11	0	rpl24
aoc2	1.27023e-15	0.489245	0.31	0.071	1.49176e-11	3	aoc2
rps71	1.34945e-15	0.141721	1	1	1.58479e-11	2	rps7
rpl9.1	1.45003e-15	0.135276	1	1	1.70291e-11	2	rpl9.1
magi1b	1.49077e-15	0.245547	0.302	0.067	1.75076e-11	3	magi1b
foxo1a	1.59849e-15	0.378436	0.4	0.026	1.87727e-11	4	foxo1a
igfbp1a	1.72756e-15	0.408632	0.689	0.426	2.02885e-11	0	igfbp1a
foxp1a	1.87744e-15	0.331813	0.4	0.026	2.20486e-11	4	foxp1a
rps24	2.18564e-15	0.130075	1	1	2.56682e-11	2	rps24
rps4x	2.22033e-15	0.127243	1	1	2.60756e-11	0	rps4x
rpl22l1	2.25928e-15	0.249898	0.989	0.95	2.6533e-11	0	rpl22l1
ywhabb	2.73429e-15	0.487834	0.319	0.083	3.21115e-11	3	ywhabb
nrarpb	2.73838e-15	0.17663	0.2	0.006	3.21596e-11	4	nrarpb
chrna1	2.73838e-15	0.17663	0.2	0.006	3.21596e-11	4	chrna1
cblc	2.73838e-15	0.17663	0.2	0.006	3.21596e-11	4	cblc
tgfb5	2.73838e-15	0.17663	0.2	0.006	3.21596e-11	4	tgfb5
wtip	2.73838e-15	0.17663	0.2	0.006	3.21596e-11	4	wtip
rpl241	2.83833e-15	0.131526	1	1	3.33334e-11	2	rpl24
asap2a	2.95103e-15	0.175496	0.2	0.006	3.46569e-11	4	asap2a
bhlhe40	3.0147e-15	0.611547	0.671	0.434	3.54047e-11	1	bhlhe40
cirbpb	3.18242e-15	0.615526	0.948	0.89	3.73744e-11	3	cirbpb
ddx31	3.34051e-15	0.272951	0.267	0.011	3.9231e-11	4	ddx31
xrcc1	3.42555e-15	0.170971	0.2	0.006	4.02296e-11	4	xrcc1
RPS17	3.53282e-15	0.152416	1	1	4.14894e-11	2	RPS17
plekhj1	3.72612e-15	0.380613	0.4	0.027	4.37596e-11	4	plekhj1
pmp22b	4.03354e-15	0.355964	0.267	0.011	4.73699e-11	4	pmp22b
CABZ01074994.1	4.24168e-15	0.357113	0.671	0.379	4.98143e-11	1	CABZ01074994.1
cadm4	4.82957e-15	0.310742	0.31	0.075	5.67185e-11	3	cadm4
pnrc2	4.88918e-15	0.312262	0.977	0.922	5.74186e-11	0	pnrc2
ppfibp1b	5.0241e-15	0.343815	0.467	0.039	5.90031e-11	4	ppfibp1b
rras	5.04808e-15	0.476346	0.467	0.038	5.92846e-11	4	rras
ccng2	5.14075e-15	0.460606	0.522	0.244	6.03729e-11	1	ccng2
fam13b	5.33966e-15	0.294008	0.4	0.027	6.27089e-11	4	fam13b
c2cd4a	6.19162e-15	0.489122	0.29	0.088	7.27144e-11	1	c2cd4a
rps19	6.2646e-15	0.125635	1	1	7.35715e-11	2	rps19
cd248a	6.3167e-15	0.228658	0.155	0.015	7.41833e-11	3	cd248a
rpia	6.33888e-15	0.462422	0.6	0.061	7.44438e-11	4	rpia
fgg	6.57255e-15	0.359184	0.893	0.767	7.7188e-11	0	fgg
rpl36a	6.82513e-15	0.15126	1	1	8.01543e-11	2	rpl36a
egr11	7.18587e-15	0.462092	0.855	0.671	8.43909e-11	1	egr1
dbi1	7.41017e-15	0.590187	0.533	0.05	8.7025e-11	4	dbi
cep131	7.4945e-15	0.316784	0.31	0.077	8.80155e-11	3	cep131
ackr4b	7.50692e-15	0.620919	0.533	0.051	8.81613e-11	4	ackr4b
gnl3l	8.87494e-15	0.311668	0.333	0.019	1.04227e-10	4	gnl3l
rpl32	8.9859e-15	0.128413	1	1	1.0553e-10	2	rpl32
rpl21	9.48783e-15	0.103825	1	1	1.11425e-10	0	rpl21
cmasa	1.0778e-14	0.430827	0.333	0.019	1.26577e-10	4	cmasa
cxcl14	1.08208e-14	0.719478	0.467	0.04	1.2708e-10	4	cxcl14
atf3	1.13321e-14	0.639004	0.498	0.249	1.33084e-10	1	atf3
col6a2	1.15293e-14	0.112655	0.086	0.001	1.354e-10	3	col6a2
rsrp1	1.15961e-14	0.416697	0.71	0.488	1.36185e-10	1	rsrp1
mfap2	1.17223e-14	0.178306	0.086	0.001	1.37667e-10	3	mfap2
junba	1.25056e-14	0.254139	0.952	0.81	1.46866e-10	0	junba
hs3st4	1.35808e-14	0.110974	0.13	0.012	1.59493e-10	1	hs3st4
krt18a.1	1.36476e-14	0.566202	0.251	0.063	1.60278e-10	1	krt18a.1
nr5a1b	1.6605e-14	0.341868	0.657	0.387	1.95009e-10	1	nr5a1b
rpl81	1.68499e-14	0.145917	1	1	1.97885e-10	2	rpl8
rps11	1.75492e-14	0.112882	1	1	2.06098e-10	2	rps11
rps12	1.7724e-14	0.114174	1	1	2.0815e-10	0	rps12
gabarapa	1.81284e-14	0.364471	0.449	0.194	2.129e-10	1	gabarapa
vegfd	2.38374e-14	0.171417	0.155	0.017	2.79946e-10	3	vegfd
hspe1	2.4597e-14	0.444174	0.983	0.95	2.88867e-10	3	hspe1
itm2bb2	2.53122e-14	1.56179	1	0.318	2.97266e-10	4	itm2bb
si:dkey-12j5.1	2.56781e-14	0.327484	0.467	0.04	3.01563e-10	4	si:dkey-12j5.1
sec61g	3.5533e-14	0.26637	0.952	0.921	4.173e-10	1	sec61g
si:ch73-335l21.41	3.73621e-14	0.590318	0.744	0.512	4.38781e-10	1	si:ch73-335l21.4
mctp1b	3.99842e-14	0.324411	0.551	0.282	4.69574e-10	1	mctp1b
rps61	4.07118e-14	0.149192	1	1	4.7812e-10	2	rps6
ppp1r1c	4.70903e-14	0.380796	0.56	0.314	5.53029e-10	1	ppp1r1c
yes1	5.23073e-14	0.263992	0.267	0.013	6.14296e-10	4	yes1
hgfa	5.50049e-14	0.122883	0.133	0.002	6.45977e-10	4	hgfa
rps4x1	5.63311e-14	0.158618	1	1	6.61552e-10	2	rps4x
rps23	5.93118e-14	0.13604	1	1	6.96557e-10	2	rps23
krt18b	6.06793e-14	0.230692	0.112	0.006	7.12618e-10	3	krt18b
rpl18	6.27921e-14	0.105367	1	1	7.37431e-10	0	rpl18
pygo2	6.31721e-14	0.306116	0.4	0.031	7.41893e-10	4	pygo2
prpsap2	6.76862e-14	0.343815	0.333	0.021	7.94906e-10	4	prpsap2
hmgn6	6.99652e-14	0.586991	0.664	0.395	8.21671e-10	3	hmgn6
rftn2	7.83552e-14	0.302799	0.4	0.031	9.20203e-10	4	rftn2
rps26l1	8.15564e-14	0.153761	1	1	9.57799e-10	2	rps26l
btbd6a	9.24093e-14	0.18882	0.164	0.021	1.08525e-09	3	btbd6a
ddit3	9.27864e-14	0.516463	0.614	0.368	1.08968e-09	1	ddit3
cyp17a1	9.37094e-14	0.406435	0.947	0.942	1.10052e-09	1	cyp17a1
ptgdsa	1.05078e-13	0.175383	0.246	0.069	1.23404e-09	0	ptgdsa
col6a3	1.07906e-13	0.191967	0.103	0.005	1.26724e-09	3	col6a3
fstl1a	1.12349e-13	0.20742	0.216	0.039	1.31942e-09	3	fstl1a
ptp4a2b1	1.149e-13	0.439762	0.8	0.111	1.34939e-09	4	ptp4a2b
rack1	1.20776e-13	0.156568	1	1	1.41839e-09	2	rack1
pld1a	1.24974e-13	0.313898	0.333	0.022	1.46769e-09	4	pld1a
atp2b1a	1.25683e-13	0.322867	0.2	0.007	1.47602e-09	4	atp2b1a
mibp2	1.42468e-13	0.240632	0.949	0.927	1.67314e-09	0	mibp2
pof1b	1.55126e-13	0.154977	0.14	0.018	1.82179e-09	1	pof1b
id2b	1.56734e-13	0.712211	0.498	0.25	1.84068e-09	1	id2b
cd74a	1.57021e-13	1.10178	0.6	0.071	1.84406e-09	4	cd74a
mcm5	1.60074e-13	0.266224	0.2	0.007	1.87991e-09	4	mcm5
si:ch211-76m11.8	1.61628e-13	0.265108	0.333	0.022	1.89815e-09	4	si:ch211-76m11.8
surf1	1.63609e-13	0.169843	0.2	0.007	1.92142e-09	4	surf1
rpl28	1.82048e-13	0.113229	1	1	2.13798e-09	2	rpl28
ccnl1a1	1.94311e-13	0.384706	0.533	0.056	2.28199e-09	4	ccnl1a
mhc1zba	2.01481e-13	0.430935	0.862	0.695	2.36619e-09	3	mhc1zba
ccdc47	2.01872e-13	0.233003	0.208	0.045	2.37079e-09	1	ccdc47
spock3	2.03471e-13	0.224408	0.28	0.085	2.38956e-09	1	spock3
actb2	2.43368e-13	0.435305	0.923	0.867	2.85812e-09	1	actb2
colec12	2.5963e-13	0.174245	0.181	0.027	3.0491e-09	3	colec12
mycn	2.68946e-13	0.222783	0.267	0.014	3.15851e-09	4	mycn
rps6ka1	2.69397e-13	0.270704	0.267	0.014	3.1638e-09	4	rps6ka1
nkd1	2.94095e-13	0.260093	0.241	0.052	3.45385e-09	3	nkd1
jam2b	2.96918e-13	0.205391	0.086	0.003	3.487e-09	3	jam2b
rpl5a	3.09706e-13	0.174466	1	0.993	3.63718e-09	0	rpl5a
si:dkey-151g10.6	3.29975e-13	0.152546	1	1	3.87522e-09	2	si:dkey-151g10.6
brd3a	3.54131e-13	0.295102	0.333	0.022	4.15891e-09	4	brd3a
gas6	3.54132e-13	0.294008	0.333	0.022	4.15892e-09	4	gas6
sars	3.70318e-13	0.431837	0.467	0.043	4.34902e-09	4	sars
hgh1	3.73457e-13	0.217168	0.267	0.014	4.38588e-09	4	hgh1
si:dkey-42i9.6	4.03698e-13	0.329646	0.4	0.032	4.74103e-09	4	si:dkey-42i9.6
tfpia	4.33974e-13	0.291078	0.147	0.017	5.09659e-09	3	tfpia
epb41l5	4.53717e-13	0.261765	0.267	0.014	5.32845e-09	4	epb41l5
cs	4.56164e-13	0.392071	0.467	0.043	5.35719e-09	4	cs
lama5	4.6886e-13	0.253665	0.193	0.041	5.50629e-09	1	lama5
fosab2	4.6887e-13	0.443552	0.991	0.951	5.50641e-09	3	fosab
rpl211	4.7374e-13	0.113333	1	1	5.5636e-09	2	rpl21
slc39a13	5.51421e-13	0.20714	0.267	0.014	6.47589e-09	4	slc39a13
il15	6.88304e-13	0.228257	0.121	0.01	8.08345e-09	3	il15
fabp3	7.23389e-13	0.514686	0.491	0.209	8.49548e-09	3	fabp3
rpl22	8.04402e-13	0.134209	1	1	9.4469e-09	2	rpl22
rpl10a1	8.09408e-13	0.134342	1	1	9.50569e-09	2	rpl10a
cldn12	8.24338e-13	0.330729	0.4	0.033	9.68102e-09	4	cldn12
dusp5	8.57078e-13	0.489751	0.444	0.193	1.00655e-08	1	dusp5
lpl	8.72418e-13	0.310855	0.387	0.181	1.02457e-08	0	lpl
b3gnt5a	8.92031e-13	0.270966	0.31	0.086	1.0476e-08	3	b3gnt5a
cldn11a	9.25907e-13	0.59505	0.478	0.235	1.08739e-08	1	cldn11a
rpsa	9.51883e-13	0.128289	1	1	1.11789e-08	2	rpsa
rpl22l11	9.90433e-13	0.305241	1	0.955	1.16316e-08	2	rpl22l1
prdx3	1.03356e-12	0.38514	0.652	0.449	1.21381e-08	1	prdx3
gpx1a	1.05798e-12	0.364088	0.899	0.833	1.24249e-08	1	gpx1a
klf6a1	1.09947e-12	0.572039	0.643	0.418	1.29121e-08	1	klf6a
nfybb	1.15083e-12	0.362264	0.467	0.046	1.35153e-08	4	nfybb
ppp6c	1.16032e-12	0.352684	0.467	0.045	1.36268e-08	4	ppp6c
si:dkey-56m19.5	1.26693e-12	0.268808	0.19	0.032	1.48788e-08	3	si:dkey-56m19.5
olfml3b	1.32055e-12	0.162573	0.164	0.023	1.55085e-08	3	olfml3b
rpl3	1.33289e-12	0.118606	1	0.998	1.56535e-08	0	rpl3
map1aa	1.41284e-12	0.222336	0.275	0.088	1.65924e-08	1	map1aa
eef1g1	1.46349e-12	0.189095	1	1	1.71872e-08	2	eef1g
med10	1.77817e-12	0.387856	0.467	0.046	2.08828e-08	4	med10
rpl18a	1.79541e-12	0.108303	1	1	2.10852e-08	0	rpl18a
igfbp5b	2.08756e-12	0.419642	0.271	0.095	2.45163e-08	0	igfbp5b
MTERF4	2.0877e-12	0.217168	0.267	0.015	2.45179e-08	4	MTERF4
tuba8l2	2.23788e-12	0.253141	0.314	0.115	2.62817e-08	1	tuba8l2
frmd6	2.35627e-12	0.380613	0.4	0.035	2.76721e-08	4	frmd6
trmt112	2.37316e-12	0.365477	0.4	0.034	2.78704e-08	4	trmt112
robo11	2.54514e-12	0.350568	0.533	0.062	2.98902e-08	4	robo1
faua1	2.55896e-12	0.13065	1	1	3.00525e-08	2	faua
si:dkey-240h12.3	2.6935e-12	0.174362	0.2	0.008	3.16325e-08	4	si:dkey-240h12.3
nxn	2.6935e-12	0.174362	0.2	0.008	3.16325e-08	4	nxn
gstz1	2.69674e-12	0.334467	0.275	0.091	3.16705e-08	1	gstz1
tcf12	2.7292e-12	0.578513	0.397	0.154	3.20518e-08	3	tcf12
fscn1a	2.7968e-12	0.413416	0.333	0.024	3.28457e-08	4	fscn1a
ier2b	2.80542e-12	0.341159	0.862	0.734	3.29468e-08	0	ier2b
snx5	2.82501e-12	0.298394	0.4	0.035	3.3177e-08	4	snx5
marcksl1a	2.84557e-12	0.574854	0.259	0.063	3.34183e-08	3	marcksl1a
uhrf1	2.85881e-12	0.173231	0.2	0.008	3.35739e-08	4	uhrf1
rbm14a	3.01291e-12	0.20714	0.267	0.015	3.53836e-08	4	rbm14a
psmd10	3.22001e-12	0.358188	0.2	0.008	3.78158e-08	4	psmd10
vapal	3.2623e-12	0.316743	0.4	0.034	3.83124e-08	4	vapal
org	3.34959e-12	0.600503	0.2	0.008	3.93376e-08	4	org
rplp01	3.38946e-12	0.148907	1	1	3.98059e-08	2	rplp0
prps1a	3.54521e-12	0.477407	0.4	0.035	4.16349e-08	4	prps1a
ier5	4.35798e-12	0.331261	0.743	0.533	5.11801e-08	0	ier5
rps17	4.55089e-12	0.205911	0.975	0.968	5.34456e-08	0	rps17
dkk3b	4.93813e-12	0.181621	0.086	0.004	5.79934e-08	3	dkk3b
pgrmc11	5.38691e-12	0.370253	1	0.973	6.32639e-08	3	pgrmc1
tmem98	5.39974e-12	0.101124	0.121	0.012	6.34146e-08	3	tmem98
rgl1	5.43877e-12	0.298394	0.4	0.037	6.38729e-08	4	rgl1
CABZ01068358.1	5.69706e-12	0.762486	0.733	0.115	6.69063e-08	4	CABZ01068358.1
cox7a1	6.08086e-12	0.30429	0.874	0.746	7.14136e-08	1	cox7a1
adma	6.5471e-12	1.00281	0.595	0.342	7.68892e-08	3	adma
h3f3d	7.14097e-12	0.423051	0.696	0.513	8.38635e-08	1	h3f3d
RPL37A	7.16952e-12	0.14858	1	1	8.41989e-08	2	RPL37A
atp5if1b	7.28094e-12	0.320718	0.488	0.24	8.55074e-08	1	atp5if1b
ctnnd2a	7.64836e-12	0.223084	0.193	0.047	8.98224e-08	1	ctnnd2a
psap	8.02774e-12	0.863554	0.733	0.123	9.42777e-08	4	psap
tmem79b	8.10457e-12	0.220533	0.267	0.016	9.51801e-08	4	tmem79b
sema4ab	8.10457e-12	0.220533	0.267	0.016	9.51801e-08	4	sema4ab
waca	8.342e-12	0.379524	0.333	0.025	9.79685e-08	4	waca
slc43a1b	9.02114e-12	0.162555	0.193	0.047	1.05944e-07	1	slc43a1b
si:ch73-22o12.1	9.34809e-12	0.322099	0.467	0.05	1.09784e-07	4	si:ch73-22o12.1
tmem106ba	9.46178e-12	0.287465	0.4	0.037	1.11119e-07	4	tmem106ba
rpl10	9.6415e-12	0.102093	1	1	1.1323e-07	2	rpl10
basp1	1.00898e-11	0.348216	0.267	0.016	1.18495e-07	4	basp1
oaz1a1	1.07509e-11	1.30703	1	0.373	1.26258e-07	4	oaz1a
cd82a	1.17354e-11	0.189056	0.342	0.143	1.37821e-07	0	cd82a
tmem131	1.20785e-11	0.289641	0.333	0.025	1.4185e-07	4	tmem131
ppiaa1	1.27352e-11	0.320867	1	0.921	1.49562e-07	3	ppiaa
mdh1aa	1.35946e-11	0.432556	0.647	0.442	1.59655e-07	1	mdh1aa
ak1	1.3651e-11	0.20825	0.267	0.016	1.60318e-07	4	ak1
CTBP1	1.37611e-11	0.331813	0.4	0.038	1.61611e-07	4	CTBP1
cemip2	1.44013e-11	0.261765	0.333	0.026	1.69129e-07	4	cemip2
slc38a5b1	1.4962e-11	0.71784	0.8	0.15	1.75714e-07	4	slc38a5b
slc4a2a	1.5269e-11	0.260653	0.333	0.026	1.79319e-07	4	slc4a2a
klf3	1.53731e-11	0.35693	0.533	0.067	1.80542e-07	4	klf3
tpd52l2a	1.54403e-11	0.291822	0.4	0.038	1.81331e-07	4	tpd52l2a
tmsb	1.54785e-11	0.234799	0.172	0.03	1.81779e-07	3	tmsb
rpl5b1	1.62686e-11	0.179563	1	0.993	1.91059e-07	2	rpl5b
fstl1b	1.69e-11	0.17221	0.147	0.021	1.98474e-07	3	fstl1b
mao	1.81384e-11	0.112219	0.14	0.023	2.13018e-07	1	mao
aldh2.2	1.83984e-11	0.356845	0.401	0.18	2.16071e-07	1	aldh2.2
wif1	1.93227e-11	0.182518	0.147	0.021	2.26926e-07	3	wif1
b2ml	1.98633e-11	0.34643	0.821	0.693	2.33274e-07	1	b2ml
robo1	2.04402e-11	0.217514	0.216	0.048	2.4005e-07	3	robo1
zgc:63882	2.07879e-11	0.286378	0.4	0.038	2.44133e-07	4	zgc:63882
cox5b2	2.0859e-11	0.236071	0.343	0.136	2.44968e-07	1	cox5b2
aldob	2.2168e-11	0.405845	0.454	0.227	2.60341e-07	1	aldob
socs3a	2.29867e-11	0.502144	0.681	0.525	2.69955e-07	0	socs3a
axin2	2.41024e-11	0.324302	0.328	0.11	2.83059e-07	3	axin2
si:dkey-51d8.6	2.54504e-11	0.121744	0.133	0.003	2.9889e-07	4	si:dkey-51d8.6
si:dkey-238k10.2	2.54504e-11	0.121744	0.133	0.003	2.9889e-07	4	si:dkey-238k10.2
bbox1	2.54504e-11	0.121744	0.133	0.003	2.9889e-07	4	bbox1
il21r.1	2.54504e-11	0.121744	0.133	0.003	2.9889e-07	4	il21r.1
bmpr2b	2.54504e-11	0.121744	0.133	0.003	2.9889e-07	4	bmpr2b
slc50a1	2.54504e-11	0.121744	0.133	0.003	2.9889e-07	4	slc50a1
CU655820.1	2.54504e-11	0.121744	0.133	0.003	2.9889e-07	4	CU655820.1
zgc:114081	2.54504e-11	0.121744	0.133	0.003	2.9889e-07	4	zgc:114081
dhrs3a	2.54504e-11	0.121744	0.133	0.003	2.9889e-07	4	dhrs3a
abtb2b	2.54504e-11	0.121744	0.133	0.003	2.9889e-07	4	abtb2b
crip2	2.54551e-11	0.175496	0.133	0.003	2.98945e-07	4	crip2
serpinb1	2.58974e-11	0.455359	0.467	0.051	3.04139e-07	4	serpinb1
si:zfos-943e10.1	2.61141e-11	0.245826	0.193	0.048	3.06684e-07	1	si:zfos-943e10.1
brf2	2.6142e-11	0.17663	0.133	0.003	3.07012e-07	4	brf2
gramd4a	2.68458e-11	0.120607	0.133	0.003	3.15277e-07	4	gramd4a
ly6m3	2.68458e-11	0.120607	0.133	0.003	3.15277e-07	4	ly6m3
CKS2	2.68483e-11	0.174362	0.133	0.003	3.15306e-07	4	CKS2
zgc:175135.2	2.75697e-11	0.175496	0.133	0.003	3.23779e-07	4	zgc:175135.2
oaz1a	2.83096e-11	0.44527	0.551	0.333	3.32468e-07	1	oaz1a
usp14	2.83144e-11	0.119472	0.133	0.003	3.32524e-07	4	usp14
ppp1r9alb	3.20735e-11	0.225038	0.2	0.009	3.76671e-07	4	ppp1r9alb
mcm3	3.20787e-11	0.322867	0.2	0.009	3.76732e-07	4	mcm3
rpl14	3.29579e-11	0.11252	1	1	3.87057e-07	2	rpl14
rpl15	3.36308e-11	0.106043	1	1	3.94961e-07	0	rpl15
aldoaa	3.41108e-11	0.834972	1	0.236	4.00597e-07	4	aldoaa
mt-atp6	3.48856e-11	0.327044	0.894	0.795	4.09696e-07	1	mt-atp6
cip2a	3.5066e-11	0.1721	0.2	0.009	4.11815e-07	4	cip2a
rplp1	3.57285e-11	0.136549	1	1	4.19595e-07	2	rplp1
uxs1	3.80163e-11	0.302799	0.333	0.027	4.46463e-07	4	uxs1
ptbp3	3.84468e-11	0.222121	0.404	0.205	4.51519e-07	0	ptbp3
rhoq	3.90533e-11	0.169843	0.2	0.009	4.58642e-07	4	rhoq
pdia2	3.90595e-11	0.267342	0.2	0.009	4.58715e-07	4	pdia2
pnrc21	4.02555e-11	0.305702	0.976	0.934	4.72761e-07	1	pnrc2
amd1	4.12139e-11	0.218289	0.2	0.009	4.84016e-07	4	amd1
amh	4.19286e-11	0.348216	0.267	0.017	4.9241e-07	4	amh
cldn11b	4.43501e-11	0.386074	0.4	0.041	5.20848e-07	4	cldn11b
dus2	4.58593e-11	0.166466	0.2	0.009	5.38571e-07	4	dus2
tpt1	4.65263e-11	0.130927	1	1	5.46405e-07	0	tpt1
sparc1	4.84371e-11	0.866197	0.933	0.199	5.68845e-07	4	sparc
slc25a5	4.8823e-11	0.113916	1	1	5.73377e-07	0	slc25a5
naa15a	5.14195e-11	0.298394	0.267	0.017	6.03871e-07	4	naa15a
plpp3	5.18188e-11	0.117666	0.103	0.009	6.0856e-07	3	plpp3
si:dkeyp-121d4.3	5.26422e-11	0.365477	0.467	0.055	6.1823e-07	4	si:dkeyp-121d4.3
scaf4b	5.43082e-11	0.328565	0.467	0.055	6.37795e-07	4	scaf4b
cyb5a	5.61038e-11	0.37513	0.7	0.522	6.58883e-07	1	cyb5a
ppp1cb	5.82431e-11	0.571786	0.6	0.089	6.84007e-07	4	ppp1cb
cyp2p7	5.84516e-11	0.115176	0.086	0.005	6.86456e-07	3	cyp2p7
map7d1a	6.10351e-11	0.326405	0.467	0.055	7.16797e-07	4	map7d1a
mknk2b	6.21024e-11	0.398981	0.478	0.246	7.2933e-07	1	mknk2b
rps8a	6.42488e-11	0.101693	1	1	7.54538e-07	0	rps8a
serpinf1	6.48306e-11	0.303991	0.449	0.23	7.61371e-07	1	serpinf1
gstm.2	6.6418e-11	0.314608	0.467	0.054	7.80013e-07	4	gstm.2
cd151	6.72431e-11	0.203974	0.129	0.017	7.89703e-07	3	cd151
hmgn2	7.22037e-11	1.77804	0.414	0.181	8.47961e-07	3	hmgn2
rpl191	7.43707e-11	0.116976	1	1	8.7341e-07	2	rpl19
nupr1b	7.57218e-11	0.3918	0.876	0.844	8.89277e-07	0	nupr1b
dhrs9	7.73059e-11	0.148278	0.116	0.016	9.07881e-07	1	dhrs9
grb2b	7.76157e-11	0.19156	0.15	0.029	9.11519e-07	1	grb2b
lsp1	7.8031e-11	0.117589	0.138	0.019	9.16396e-07	3	lsp1
rpl13	8.00158e-11	0.110595	1	1	9.39706e-07	2	rpl13
ghra	8.12265e-11	0.296198	0.4	0.041	9.53924e-07	4	ghra
luzp1	9.1759e-11	0.300594	0.333	0.029	1.07762e-06	4	luzp1
mpp3a	9.77645e-11	0.127615	0.121	0.014	1.14815e-06	3	mpp3a
wsb1	9.80576e-11	0.424682	0.533	0.068	1.15159e-06	4	wsb1
got2b	1.03269e-10	0.441376	0.4	0.041	1.21279e-06	4	got2b
dnajb1b	1.32241e-10	0.422372	0.812	0.684	1.55303e-06	1	dnajb1b
rpl151	1.39868e-10	0.124066	1	1	1.64261e-06	2	rpl15
cst3	1.47221e-10	0.350197	0.647	0.442	1.72896e-06	1	cst3
si:ch211-212k18.9	1.48578e-10	0.231566	0.276	0.083	1.7449e-06	3	si:ch211-212k18.9
aldh6a1	1.49053e-10	0.32636	0.657	0.453	1.75048e-06	1	aldh6a1
rps29	1.50643e-10	0.156011	1	1	1.76916e-06	2	rps29
col1a1a	1.52889e-10	0.260402	0.095	0.008	1.79553e-06	3	col1a1a
ewsr1a	1.55798e-10	0.189049	0.224	0.055	1.82969e-06	3	ewsr1a
tspan18b	1.59532e-10	0.15957	0.095	0.008	1.87354e-06	3	tspan18b
elf2b	1.61188e-10	0.212699	0.267	0.018	1.89299e-06	4	elf2b
cpn1.1	1.62546e-10	0.287363	0.407	0.209	1.90894e-06	0	cpn1.1
fabp11a	1.64762e-10	0.257883	0.095	0.008	1.93496e-06	3	fabp11a
fundc1	1.74315e-10	0.286378	0.333	0.029	2.04715e-06	4	fundc1
clic41	1.75406e-10	0.348675	0.533	0.07	2.05997e-06	4	clic4
sik2b	1.78002e-10	0.232534	0.233	0.061	2.09046e-06	3	sik2b
plekha6	1.78449e-10	0.169458	0.198	0.056	2.0957e-06	1	plekha6
serbp1a	1.84817e-10	0.305817	0.991	0.917	2.17049e-06	3	serbp1a
lrpap1	1.88711e-10	0.169485	0.207	0.046	2.21622e-06	3	lrpap1
pim2	1.91475e-10	0.411196	0.259	0.076	2.24869e-06	3	pim2
rpz51	2.25089e-10	1.03806	0.733	0.15	2.64345e-06	4	rpz5
tnfsf12	2.42915e-10	0.184474	0.138	0.021	2.8528e-06	3	tnfsf12
zdhhc9	2.53793e-10	0.116181	0.155	0.034	2.98055e-06	1	zdhhc9
hmgn7	2.55641e-10	0.519465	0.56	0.308	3.00225e-06	3	hmgn7
stmn1a	2.69561e-10	0.352684	0.267	0.018	3.16573e-06	4	stmn1a
vwa1	2.70493e-10	0.1721	0.2	0.01	3.17667e-06	4	vwa1
flrt3	2.77697e-10	0.159185	0.129	0.018	3.26128e-06	3	flrt3
cldn11a1	2.91294e-10	1.22729	0.933	0.281	3.42095e-06	4	cldn11a
fxyd1	2.98682e-10	0.220533	0.2	0.01	3.50772e-06	4	fxyd1
ccdc1871	3.02513e-10	0.710164	0.733	0.143	3.55271e-06	4	ccdc187
mcm4	3.18828e-10	0.263992	0.2	0.01	3.74432e-06	4	mcm4
phldb2b	3.45948e-10	0.163101	0.2	0.01	4.06282e-06	4	phldb2b
pik3ip1	3.56023e-10	0.436772	0.733	0.126	4.18113e-06	4	pik3ip1
CABZ01077217.1	3.73842e-10	0.206628	0.28	0.107	4.39041e-06	1	CABZ01077217.1
myl12.11	3.83107e-10	0.717054	0.933	0.224	4.49921e-06	4	myl12.1
rps28	3.86701e-10	0.157214	1	1	4.54141e-06	2	rps28
rpl36	4.26609e-10	0.139028	1	1	5.01009e-06	2	rpl36
actb11	4.31671e-10	0.717687	0.733	0.6	5.06954e-06	3	actb1
mgat4b	4.42508e-10	0.214931	0.267	0.019	5.19681e-06	4	mgat4b
p4ha1b	4.59743e-10	0.21441	0.155	0.035	5.39922e-06	1	p4ha1b
mmp14a	4.61448e-10	0.392541	0.319	0.112	5.41925e-06	3	mmp14a
nme2b.1	4.69423e-10	0.135674	1	1	5.51291e-06	2	nme2b.1
zeb1b	4.71205e-10	0.213349	0.267	0.08	5.53383e-06	3	zeb1b
rps6	4.89176e-10	0.113175	1	1	5.74489e-06	0	rps6
prkag2a	5.06023e-10	0.382459	0.459	0.254	5.94273e-06	1	prkag2a
rpl34	5.36949e-10	0.144779	1	1	6.30593e-06	2	rpl34
swap70b	5.39612e-10	0.256219	0.267	0.019	6.3372e-06	4	swap70b
si:ch211-139a5.9	5.47136e-10	0.203599	0.227	0.076	6.42557e-06	1	si:ch211-139a5.9
hnrnpa0b	5.50685e-10	0.560083	0.5	0.268	6.46725e-06	3	hnrnpa0b
pcdh7a	5.52052e-10	0.123146	0.145	0.031	6.4833e-06	1	pcdh7a
snrpb1	5.80521e-10	0.591806	0.6	0.091	6.81764e-06	4	snrpb
2020-06-02	6.57439e-10	0.340765	0.991	0.959	7.72097e-06	3	jun
nr0b1	7.19052e-10	0.221493	0.241	0.065	8.44455e-06	3	nr0b1
mt-nd4	7.37756e-10	0.318069	0.841	0.718	8.6642e-06	1	mt-nd4
cbx7a	7.38678e-10	0.401509	0.536	0.31	8.67504e-06	1	cbx7a
slc38a2	7.51924e-10	0.422388	0.4	0.045	8.83059e-06	4	slc38a2
rps3a1	7.81114e-10	0.108127	1	1	9.1734e-06	2	rps3a
atrx1	8.34211e-10	0.614483	0.867	0.185	9.79697e-06	4	atrx
FP102018.1	9.63201e-10	0.254009	0.333	0.032	1.13118e-05	4	FP102018.1
ndufa4l	9.80047e-10	0.240255	0.894	0.865	1.15097e-05	1	ndufa4l
znf395b	1.04277e-09	0.381566	0.4	0.045	1.22463e-05	4	znf395b
mertka	1.05411e-09	0.168978	0.28	0.108	1.23795e-05	1	mertka
fkbp1b	1.06272e-09	0.251804	0.333	0.032	1.24806e-05	4	fkbp1b
pmaip1	1.15513e-09	0.268196	0.155	0.037	1.35658e-05	1	pmaip1
add3b	1.16841e-09	0.129986	0.121	0.017	1.37218e-05	3	add3b
mapk14a	1.17752e-09	0.270223	0.333	0.031	1.38288e-05	4	mapk14a
antxr2a	1.18467e-09	0.260334	0.284	0.095	1.39128e-05	3	antxr2a
ntd5	1.19197e-09	0.116459	0.078	0.005	1.39985e-05	3	ntd5
hipk2	1.23057e-09	0.249604	0.333	0.032	1.44518e-05	4	hipk2
selenof	1.25375e-09	0.511968	0.8	0.161	1.47241e-05	4	selenof
add3a	1.25709e-09	0.348378	0.328	0.12	1.47632e-05	3	add3a
ier2a	1.28528e-09	0.309764	0.669	0.495	1.50944e-05	0	ier2a
mgat2	1.29193e-09	0.248505	0.333	0.032	1.51724e-05	4	mgat2
rsl24d1	1.418e-09	0.137156	1	0.998	1.6653e-05	0	rsl24d1
si:ch211-246m6.5	1.48017e-09	0.17663	0.133	0.005	1.73831e-05	4	si:ch211-246m6.5
slc38a4	1.49624e-09	0.283126	0.333	0.032	1.75719e-05	4	slc38a4
adgrg1.1	1.5469e-09	0.120607	0.133	0.005	1.81668e-05	4	adgrg1.1
ciz1a	1.5469e-09	0.120607	0.133	0.005	1.81668e-05	4	ciz1a
si:dkey-68o6.6	1.5469e-09	0.120607	0.133	0.005	1.81668e-05	4	si:dkey-68o6.6
ackr3b	1.5469e-09	0.120607	0.133	0.005	1.81668e-05	4	ackr3b
asb5b	1.5469e-09	0.120607	0.133	0.005	1.81668e-05	4	asb5b
zgc:165656	1.5469e-09	0.120607	0.133	0.005	1.81668e-05	4	zgc:165656
cx30.3	1.5469e-09	0.120607	0.133	0.005	1.81668e-05	4	cx30.3
gypc	1.5469e-09	0.120607	0.133	0.005	1.81668e-05	4	gypc
sorbs3	1.5469e-09	0.120607	0.133	0.005	1.81668e-05	4	sorbs3
syne1b	1.5469e-09	0.120607	0.133	0.005	1.81668e-05	4	syne1b
prss23	1.5469e-09	0.120607	0.133	0.005	1.81668e-05	4	prss23
col16a1	1.5469e-09	0.120607	0.133	0.005	1.81668e-05	4	col16a1
zgc:85858	1.5469e-09	0.120607	0.133	0.005	1.81668e-05	4	zgc:85858
AL844518.1	1.5469e-09	0.120607	0.133	0.005	1.81668e-05	4	AL844518.1
ccdc120	1.5469e-09	0.120607	0.133	0.005	1.81668e-05	4	ccdc120
mak	1.5469e-09	0.120607	0.133	0.005	1.81668e-05	4	mak
CR381618.1	1.5469e-09	0.120607	0.133	0.005	1.81668e-05	4	CR381618.1
amotl2b	1.54732e-09	0.370513	0.133	0.005	1.81717e-05	4	amotl2b
erh1	1.56073e-09	0.549908	0.6	0.097	1.83292e-05	4	erh
spata2l	1.59963e-09	0.170971	0.2	0.011	1.8786e-05	4	spata2l
rps21	1.60741e-09	0.153779	1	1	1.88774e-05	2	rps21
dnmbp	1.62892e-09	0.286378	0.4	0.047	1.91301e-05	4	dnmbp
alcama	1.63101e-09	0.967431	1	0.438	1.91546e-05	4	alcama
chchd1	1.65339e-09	0.173231	0.133	0.005	1.94175e-05	4	chchd1
pin4	1.65619e-09	0.296198	0.267	0.021	1.94503e-05	4	pin4
gmpr2	1.65633e-09	0.498305	0.4	0.047	1.9452e-05	4	gmpr2
kctd10	1.6741e-09	0.169843	0.2	0.011	1.96607e-05	4	kctd10
nr1d1	1.6741e-09	0.169843	0.2	0.011	1.96607e-05	4	nr1d1
bcl2a	1.6741e-09	0.169843	0.2	0.011	1.96607e-05	4	bcl2a
wipf1b	1.69012e-09	0.173231	0.133	0.005	1.98488e-05	4	wipf1b
ttll12	1.69024e-09	0.118337	0.133	0.005	1.98502e-05	4	ttll12
zgc:110796	1.69024e-09	0.118337	0.133	0.005	1.98502e-05	4	zgc:110796
stag1b	1.69024e-09	0.118337	0.133	0.005	1.98502e-05	4	stag1b
nipa2	1.69497e-09	0.20714	0.267	0.021	1.99058e-05	4	nipa2
fosab	1.70631e-09	0.211606	0.997	0.929	2.00389e-05	0	fosab
smo	1.73951e-09	0.304949	0.448	0.208	2.04288e-05	3	smo
cdon	1.74058e-09	0.431437	0.724	0.563	2.04414e-05	3	cdon
si:ch211-79k12.1	1.75187e-09	0.168716	0.2	0.011	2.0574e-05	4	si:ch211-79k12.1
tars	1.76656e-09	0.117204	0.133	0.005	2.07465e-05	4	tars
si:dkey-16p21.8	1.7666e-09	0.116072	0.133	0.005	2.0747e-05	4	si:dkey-16p21.8
amotl2a	1.80599e-09	0.169843	0.133	0.005	2.12096e-05	4	amotl2a
nelfa	1.84615e-09	0.116072	0.133	0.005	2.16812e-05	4	nelfa
her62	1.88137e-09	1.00795	0.867	0.202	2.20948e-05	4	her6
lims11	2.00102e-09	0.367043	0.533	0.081	2.34999e-05	4	lims1
ddx52	2.0064e-09	0.214931	0.2	0.011	2.35632e-05	4	ddx52
si:ch73-376l24.2	2.09869e-09	0.164222	0.2	0.011	2.4647e-05	4	si:ch73-376l24.2
xiap	2.19525e-09	0.161982	0.2	0.011	2.5781e-05	4	xiap
tnfrsf21	2.25588e-09	0.116181	0.14	0.031	2.64931e-05	1	tnfrsf21
cd74b1	2.36423e-09	1.0402	0.6	0.106	2.77655e-05	4	cd74b
nrip1b	2.38428e-09	0.2309	0.372	0.18	2.8001e-05	1	nrip1b
rps51	2.39002e-09	0.105893	1	1	2.80685e-05	2	rps5
hsd3b1	2.61414e-09	0.205289	0.924	0.816	3.07005e-05	0	hsd3b1
cox6a1	2.70589e-09	0.450675	0.319	0.12	3.1778e-05	3	cox6a1
pabpc1a	2.72936e-09	0.290854	0.931	0.898	3.20535e-05	3	pabpc1a
cd81a1	2.78842e-09	0.558322	0.933	0.217	3.27472e-05	4	cd81a
ndufb5	2.87981e-09	0.382014	0.733	0.13	3.38205e-05	4	ndufb5
pcnt	2.88354e-09	0.261765	0.267	0.022	3.38643e-05	4	pcnt
stat2	2.8947e-09	0.453399	0.467	0.063	3.39954e-05	4	stat2
xbp1	3.00493e-09	0.580545	0.534	0.32	3.52899e-05	3	xbp1
park7	3.02134e-09	0.211782	0.203	0.064	3.54826e-05	1	park7
gata61	3.04194e-09	0.59152	0.667	0.124	3.57245e-05	4	gata6
tgif1	3.1721e-09	0.397855	0.533	0.079	3.72531e-05	4	tgif1
il4r.1.1	3.26213e-09	0.136501	0.198	0.049	3.83104e-05	3	il4r.1.1
rps22	3.39564e-09	0.114841	1	1	3.98784e-05	2	rps2
sptlc2a	3.47203e-09	0.254009	0.333	0.034	4.07755e-05	4	sptlc2a
cebpd	3.50757e-09	0.412335	0.498	0.273	4.11929e-05	1	cebpd
seta	3.54258e-09	0.383942	0.293	0.102	4.16041e-05	3	seta
nop10	3.64673e-09	0.425409	0.328	0.128	4.28272e-05	3	nop10
ints1	3.68881e-09	0.210472	0.267	0.022	4.33214e-05	4	ints1
psme1	3.79543e-09	0.428756	0.533	0.081	4.45736e-05	4	psme1
hspd1	4.0206e-09	0.460256	0.879	0.821	4.72179e-05	3	hspd1
gcdha	4.06329e-09	0.179433	0.372	0.178	4.77193e-05	1	gcdha
nr0b2a	4.08692e-09	0.152845	0.111	0.019	4.79968e-05	1	nr0b2a
ccdc187	4.10772e-09	0.298978	0.28	0.114	4.82411e-05	1	ccdc187
egfra	4.2274e-09	0.199451	0.164	0.035	4.96466e-05	3	egfra
mcm6	4.29739e-09	0.136319	0.103	0.013	5.04685e-05	3	mcm6
tnpo2	4.31715e-09	0.249604	0.267	0.022	5.07006e-05	4	tnpo2
rpl37.1	4.56655e-09	0.13865	1	1	5.36296e-05	2	rpl37.1
btbd6a1	4.57924e-09	0.245218	0.333	0.034	5.37785e-05	4	btbd6a
rpl38	4.59868e-09	0.149878	1	1	5.40069e-05	2	rpl38
dazap2	4.63811e-09	0.272362	0.333	0.033	5.44699e-05	4	dazap2
rpl39	4.71027e-09	0.126548	1	1	5.53174e-05	2	rpl39
mrpl28	4.87884e-09	0.245218	0.267	0.022	5.72971e-05	4	mrpl28
rdh10b	4.96196e-09	0.327076	0.15	0.037	5.82732e-05	1	rdh10b
tubgcp3	5.01761e-09	0.244124	0.333	0.034	5.89268e-05	4	tubgcp3
otofa	5.27494e-09	0.153446	0.353	0.171	6.19489e-05	0	otofa
fosab1	5.38224e-09	0.251674	1	0.943	6.3209e-05	1	fosab
ktn1	5.90687e-09	0.361195	0.4	0.05	6.93703e-05	4	ktn1
gstp1	5.96344e-09	0.502948	0.474	0.232	7.00347e-05	3	gstp1
CR848833.1	6.09211e-09	0.128724	0.129	0.022	7.15458e-05	3	CR848833.1
rrp12	6.40259e-09	0.270704	0.2	0.013	7.5192e-05	4	rrp12
ctnnb11	6.4857e-09	0.321111	0.6	0.096	7.61681e-05	4	ctnnb1
rps26l	6.54643e-09	0.10718	1	1	7.68813e-05	0	rps26l
prpf6	6.58108e-09	0.222783	0.2	0.013	7.72882e-05	4	prpf6
tmsb4x1	6.65454e-09	1.12915	1	0.443	7.81509e-05	4	tmsb4x
tasp1	6.68945e-09	0.251804	0.333	0.035	7.85609e-05	4	tasp1
txn	6.7212e-09	0.259272	0.224	0.065	7.89338e-05	3	txn
pttg1ipb	6.89482e-09	0.312478	0.333	0.034	8.09727e-05	4	pttg1ipb
elocb	6.94098e-09	0.229373	0.246	0.094	8.15149e-05	1	elocb
dhodh	6.99694e-09	0.249604	0.333	0.035	8.2172e-05	4	dhodh
tex2	7.35641e-09	0.169843	0.2	0.013	8.63937e-05	4	tex2
ran	7.57771e-09	0.479706	0.707	0.592	8.89926e-05	3	ran
asnsd1	7.59113e-09	0.27773	0.4	0.05	8.91502e-05	4	asnsd1
rasd1	7.6233e-09	0.414179	0.607	0.439	8.95281e-05	0	rasd1
si:dkeyp-118h3.6	7.6732e-09	0.168716	0.2	0.013	9.0114e-05	4	si:dkeyp-118h3.6
inhbab	7.73128e-09	0.14689	0.305	0.14	9.07962e-05	0	inhbab
gbf1	7.85614e-09	0.212699	0.267	0.023	9.22625e-05	4	gbf1
arl5a	8.00287e-09	0.16759	0.2	0.013	9.39858e-05	4	arl5a
g3bp1	8.00813e-09	0.308333	0.2	0.013	9.40475e-05	4	g3bp1
rps6ka3a	8.11958e-09	0.217168	0.2	0.013	9.53564e-05	4	rps6ka3a
fnip1	8.20357e-09	0.211585	0.267	0.023	9.63427e-05	4	fnip1
cyp2ad3	8.34602e-09	0.163101	0.2	0.013	9.80156e-05	4	cyp2ad3
hmgn3	9.01453e-09	0.174657	0.159	0.044	0.000105867	1	hmgn3
rad23b	9.07429e-09	0.164222	0.2	0.013	0.000106568	4	rad23b
lsm7	9.4196e-09	0.220365	0.333	0.034	0.000110624	4	lsm7
jag1b	9.67209e-09	0.317042	0.534	0.297	0.000113589	3	jag1b
id1	1.0233e-08	1.02818	0.467	0.07	0.000120176	4	id1
nasp	1.11726e-08	0.288552	0.2	0.013	0.000131211	4	nasp
cxcl12a	1.2531e-08	0.427456	0.086	0.009	0.000147164	3	cxcl12a
dcun1d2b	1.26457e-08	0.141651	0.251	0.098	0.000148511	1	dcun1d2b
copb1	1.27383e-08	0.275579	0.4	0.051	0.000149598	4	copb1
her91	1.28095e-08	0.635635	0.533	0.087	0.000150435	4	her9
tuba8l4	1.28969e-08	0.457703	0.449	0.265	0.000151461	1	tuba8l4
prdx1	1.29141e-08	0.215346	0.112	0.017	0.000151663	3	prdx1
ccnd2a1	1.36278e-08	0.288305	0.4	0.05	0.000160045	4	ccnd2a
dennd5b	1.36726e-08	0.155352	0.222	0.08	0.000160572	1	dennd5b
pygmb	1.38e-08	0.141809	0.155	0.042	0.000162068	1	pygmb
pik3r3b	1.43638e-08	0.234104	0.782	0.609	0.000168688	0	pik3r3b
magoh	1.4374e-08	0.290384	0.4	0.049	0.000168809	4	magoh
rpl5b	1.45246e-08	0.128867	0.997	0.993	0.000170577	0	rpl5b
commd4	1.45408e-08	0.30295	0.467	0.07	0.000170767	4	commd4
os9	1.47238e-08	0.239762	0.267	0.023	0.000172917	4	os9
slc25a39	1.55187e-08	0.166715	0.13	0.029	0.000182252	1	slc25a39
ndufaf2	1.66261e-08	0.115118	0.095	0.012	0.000195257	3	ndufaf2
canx1	1.67218e-08	0.238674	0.4	0.049	0.000196381	4	canx
eva1ba	1.71855e-08	0.140184	0.181	0.045	0.000201826	3	eva1ba
fzd2	1.8234e-08	0.279543	0.31	0.123	0.00021414	3	fzd2
mpzl2b	1.84436e-08	0.441376	0.333	0.038	0.000216602	4	mpzl2b
hspa81	1.90371e-08	0.495354	0.75	0.612	0.000223572	3	hspa8
taf15	1.96899e-08	0.41096	0.333	0.037	0.000231238	4	taf15
slc9a7	2.02099e-08	0.20825	0.267	0.024	0.000237346	4	slc9a7
CU468917.1	2.10598e-08	0.20714	0.267	0.024	0.000247327	4	CU468917.1
trmt61b	2.14639e-08	0.248505	0.333	0.038	0.000252072	4	trmt61b
jdp2b1	2.35945e-08	0.358703	0.879	0.73	0.000277094	1	jdp2b
stk17a	2.38606e-08	0.139017	0.203	0.07	0.000280219	1	stk17a
sqstm1	2.38754e-08	0.317094	0.246	0.099	0.000280392	1	sqstm1
jund1	2.42649e-08	0.331782	0.647	0.463	0.000284967	1	jund
ier51	2.53956e-08	0.353869	0.744	0.577	0.000298245	1	ier5
brd2a	2.60121e-08	0.299547	0.391	0.209	0.000305486	1	brd2a
mcl1a1	2.6161e-08	0.443367	0.734	0.585	0.000307234	1	mcl1a
ranbp1	2.63794e-08	0.387569	0.933	0.211	0.000309799	4	ranbp1
si:dkey-93n13.1	2.67539e-08	0.17663	0.133	0.006	0.000314197	4	si:dkey-93n13.1
stxbp5a	2.67539e-08	0.17663	0.133	0.006	0.000314197	4	stxbp5a
lgmn	2.6893e-08	0.340052	0.4	0.053	0.000315831	4	lgmn
lin7a	2.77605e-08	0.172493	0.241	0.077	0.00032602	3	lin7a
kras	2.79166e-08	0.309292	0.467	0.073	0.000327852	4	kras
gabarapb	2.80753e-08	0.295478	0.633	0.478	0.000329716	1	gabarapb
calr3b	2.86876e-08	0.245168	0.25	0.085	0.000336907	3	calr3b
znf1050	2.94069e-08	0.119472	0.133	0.006	0.000345355	4	znf1050
inpp4ab	2.94069e-08	0.119472	0.133	0.006	0.000345355	4	inpp4ab
si:ch211-214p13.9	2.94069e-08	0.119472	0.133	0.006	0.000345355	4	si:ch211-214p13.9
efna5b	2.94069e-08	0.119472	0.133	0.006	0.000345355	4	efna5b
mier3b	2.94069e-08	0.119472	0.133	0.006	0.000345355	4	mier3b
irf2bp2a	2.94069e-08	0.119472	0.133	0.006	0.000345355	4	irf2bp2a
tmem106bb	2.94069e-08	0.119472	0.133	0.006	0.000345355	4	tmem106bb
cav2	2.94069e-08	0.119472	0.133	0.006	0.000345355	4	cav2
prmt1	2.9602e-08	0.367376	0.207	0.061	0.000347646	3	prmt1
zgc:1717501	3.03315e-08	0.462906	0.2	0.014	0.000356213	4	zgc:171750
vasna	3.11099e-08	0.165343	0.2	0.014	0.000365355	4	vasna
xab2	3.1128e-08	0.1721	0.133	0.006	0.000365567	4	xab2
mid1ip1b	3.22914e-08	0.212497	0.353	0.19	0.000379231	0	mid1ip1b
gtf2h3	3.23223e-08	0.170971	0.133	0.006	0.000379593	4	gtf2h3
sgf29	3.23223e-08	0.170971	0.133	0.006	0.000379593	4	sgf29
rnf144b	3.24535e-08	0.317812	0.4	0.055	0.000381134	4	rnf144b
id2a	3.31947e-08	0.356939	0.59	0.443	0.000389838	0	id2a
dhx37	3.42057e-08	0.114942	0.133	0.006	0.000401712	4	dhx37
ino80e	3.49645e-08	0.158632	0.2	0.014	0.000410623	4	ino80e
arl4ab1	3.54737e-08	0.228939	0.333	0.038	0.000416604	4	arl4ab
rpl23a	3.68446e-08	0.101763	1	1	0.000432703	2	rpl23a
got2a	3.74231e-08	0.307173	0.467	0.074	0.000439496	4	got2a
slc26a5	3.7536e-08	0.246312	0.333	0.039	0.000440823	4	slc26a5
h2afvb	3.87849e-08	0.69494	0.216	0.067	0.00045549	3	h2afvb
im:7147486	3.9649e-08	0.20936	0.267	0.025	0.000465638	4	im:7147486
CABZ01086293.1	3.9649e-08	0.20936	0.267	0.025	0.000465638	4	CABZ01086293.1
tent5ba	3.96491e-08	0.20825	0.267	0.025	0.000465639	4	tent5ba
gtpbp4	4.17571e-08	0.17581	0.921	0.844	0.000490396	0	gtpbp4
ciapin1	4.24534e-08	0.243032	0.333	0.039	0.000498572	4	ciapin1
pbdc1	4.30827e-08	0.323002	0.6	0.104	0.000505964	4	pbdc1
oxa1l	4.46541e-08	0.206032	0.267	0.025	0.000524418	4	oxa1l
ecm1b1	4.50629e-08	1.00427	1	0.461	0.000529218	4	ecm1b
hnrnpabb1	4.70719e-08	0.604491	0.6	0.106	0.000552812	4	hnrnpabb
gstr	4.71666e-08	0.308773	0.411	0.225	0.000553924	1	gstr
eif2b4	4.86799e-08	0.276654	0.4	0.056	0.000571697	4	eif2b4
si:dkey-23i12.7	4.89406e-08	0.144971	0.078	0.008	0.000574759	3	si:dkey-23i12.7
snrpf1	4.93506e-08	0.377544	0.667	0.128	0.000579574	4	snrpf
khdrbs1a	4.97327e-08	0.51503	0.534	0.339	0.000584061	3	khdrbs1a
tspan7	5.00483e-08	0.245547	0.155	0.036	0.000587767	3	tspan7
svild	5.0772e-08	0.254007	0.147	0.032	0.000596266	3	svild
mmadhc	5.13236e-08	0.264895	0.4	0.055	0.000602745	4	mmadhc
anxa1a	5.23558e-08	0.218143	0.095	0.013	0.000614867	3	anxa1a
mrpl34	5.33881e-08	0.220365	0.333	0.038	0.00062699	4	mrpl34
naca	5.35969e-08	0.103629	1	1	0.000629443	2	naca
CABZ01080568.1	5.43975e-08	0.130947	0.15	0.042	0.000638844	1	CABZ01080568.1
eef1b2	5.69599e-08	0.186735	1	0.975	0.000668937	2	eef1b2
rnf7	5.81858e-08	0.301421	0.478	0.282	0.000683334	1	rnf7
vdac2	5.83894e-08	0.382977	0.664	0.495	0.000685725	3	vdac2
cldn5a	5.9029e-08	0.236938	0.25	0.086	0.000693237	3	cldn5a
mbnl31	6.10298e-08	0.563906	0.667	0.144	0.000716734	4	mbnl3
rsl24d11	6.59238e-08	0.143451	1	0.999	0.000774209	2	rsl24d1
zgc:152791	6.68505e-08	0.422007	0.319	0.126	0.000785092	3	zgc:152791
tmsb4x	6.73915e-08	0.719	0.586	0.432	0.000791446	3	tmsb4x
hagh	6.94604e-08	0.128758	0.198	0.07	0.000815743	1	hagh
cox7c1	7.22197e-08	0.540202	0.8	0.187	0.000848148	4	cox7c
prmt5	7.28817e-08	0.107513	0.06	0.004	0.000855922	3	prmt5
ecm1b	7.80436e-08	0.339256	0.571	0.404	0.000916544	0	ecm1b
ptprea	7.82153e-08	0.220533	0.2	0.015	0.00091856	4	ptprea
ppp3r1b	7.86779e-08	0.332757	0.467	0.076	0.000923993	4	ppp3r1b
tmem258	8.04175e-08	0.366101	0.284	0.112	0.000944423	3	tmem258
per31	8.18652e-08	0.370138	0.4	0.056	0.000961425	4	per3
retreg3	8.30391e-08	0.20714	0.267	0.026	0.000975212	4	retreg3
l3mbtl2	8.30391e-08	0.20714	0.267	0.026	0.000975212	4	l3mbtl2
si:ch211-212k18.8	8.78335e-08	0.171901	0.198	0.058	0.00103152	3	si:ch211-212k18.8
rnd3a	8.80099e-08	0.121187	0.129	0.026	0.00103359	3	rnd3a
nup155	8.82956e-08	0.16759	0.2	0.015	0.00103694	4	nup155
rps18	8.85474e-08	0.122784	1	1	0.0010399	2	rps18
stx2a	8.99958e-08	0.144962	0.291	0.142	0.00105691	0	stx2a
hipk3a	9.08997e-08	0.168491	0.251	0.107	0.00106753	1	hipk3a
dhrs3b	9.1598e-08	0.166466	0.2	0.015	0.00107573	4	dhrs3b
lrrc17	9.18291e-08	0.101267	0.129	0.026	0.00107844	3	lrrc17
mt-nd2	9.38185e-08	0.351674	0.652	0.528	0.0011018	1	mt-nd2
noc2l	9.41026e-08	0.245218	0.333	0.041	0.00110514	4	noc2l
pgm2	9.43358e-08	0.420996	0.6	0.126	0.00110788	4	pgm2
nrxn2b	9.50165e-08	0.164222	0.2	0.015	0.00111587	4	nrxn2b
per3	9.52744e-08	0.16014	0.14	0.038	0.0011189	1	per3
atp5md	9.73647e-08	0.43633	0.533	0.095	0.00114345	4	atp5md
atf4b1	9.94324e-08	0.484289	0.69	0.601	0.00116773	3	atf4b
plxna3	1.01463e-07	0.133203	0.164	0.041	0.00119158	3	plxna3
pabpn1	1.01947e-07	0.345599	0.397	0.19	0.00119727	3	pabpn1
cox6a11	1.02539e-07	0.518337	0.667	0.137	0.00120422	4	cox6a1
sik1	1.02838e-07	0.238929	0.15	0.044	0.00120773	1	sik1
pnp5a	1.03858e-07	0.144222	0.097	0.018	0.00121971	1	pnp5a
cox6b2	1.03883e-07	0.181628	0.971	0.953	0.00122	1	cox6b2
pcdh20.1	1.05012e-07	0.164144	0.373	0.209	0.00123326	0	pcdh20.1
rnd1b	1.11057e-07	0.132482	0.251	0.104	0.00130426	1	rnd1b
f3b	1.11072e-07	0.941461	0.448	0.257	0.00130443	3	f3b
prkcdb	1.14437e-07	0.260653	0.267	0.027	0.00134394	4	prkcdb
pgrmc2	1.21084e-07	0.238674	0.267	0.026	0.00142202	4	pgrmc2
znf3301	1.23514e-07	0.232174	0.333	0.041	0.00145054	4	znf330
maff	1.25511e-07	0.261664	0.414	0.206	0.001474	3	maff
inhbaa1	1.26198e-07	0.460501	0.6	0.116	0.00148207	4	inhbaa
iscub	1.27169e-07	0.287541	0.343	0.173	0.00149348	1	iscub
tjp1a1	1.27284e-07	0.316401	0.6	0.113	0.00149482	4	tjp1a
rrp1	1.30047e-07	0.312478	0.4	0.059	0.00152727	4	rrp1
fndc3a	1.31705e-07	0.145973	0.242	0.099	0.00154674	1	fndc3a
isg15	1.32151e-07	0.488437	0.533	0.098	0.00155198	4	isg15
marveld2a	1.35147e-07	0.254009	0.267	0.027	0.00158717	4	marveld2a
waplb	1.35218e-07	0.267023	0.4	0.058	0.001588	4	waplb
si:ch211-136a13.1	1.36066e-07	0.153952	0.452	0.276	0.00159795	0	si:ch211-136a13.1
mych	1.40667e-07	0.15314	0.103	0.017	0.00165199	3	mych
arl6ip1	1.46952e-07	0.288294	0.382	0.2	0.00172581	1	arl6ip1
adgrb1a	1.47792e-07	0.20825	0.267	0.027	0.00173567	4	adgrb1a
ppifb	1.48286e-07	0.158423	0.164	0.051	0.00174147	1	ppifb
si:dkey-74k8.3	1.53337e-07	0.20714	0.267	0.027	0.00180079	4	si:dkey-74k8.3
caskin1	1.57979e-07	0.257942	0.415	0.243	0.0018553	1	caskin1
colec111	1.58193e-07	0.40756	0.4	0.057	0.00185782	4	colec11
aldh1a2	1.59901e-07	0.387067	0.867	0.205	0.00187788	4	aldh1a2
dohh	1.67826e-07	0.263833	0.333	0.041	0.00197095	4	dohh
fbl	1.69093e-07	0.305601	0.19	0.055	0.00198583	3	fbl
znf207b	1.71166e-07	0.20382	0.267	0.027	0.00201017	4	znf207b
si:ch1073-385f13.3	1.72962e-07	0.171428	0.13	0.035	0.00203126	1	si:ch1073-385f13.3
p4ha1b1	1.74868e-07	0.3173	0.4	0.057	0.00205365	4	p4ha1b
pbxip1b	1.76047e-07	0.230556	0.333	0.161	0.0020675	1	pbxip1b
h3f3a1	1.81059e-07	0.46883	0.6	0.112	0.00212636	4	h3f3a
degs1	1.85462e-07	0.310353	0.4	0.061	0.00217807	4	degs1
commd2	1.90934e-07	0.19941	0.267	0.027	0.00224233	4	commd2
mt-nd6	1.92368e-07	0.122328	0.147	0.035	0.00225916	3	mt-nd6
rpl5a1	1.93958e-07	0.151081	0.995	0.996	0.00227785	2	rpl5a
pgrmc1	2.00352e-07	0.17737	0.976	0.977	0.00235293	1	pgrmc1
hspb11	2.05221e-07	0.812592	0.276	0.103	0.00241011	3	hspb1
atp2b4	2.12897e-07	0.279885	0.267	0.027	0.00250026	4	atp2b4
cyp11a2	2.15292e-07	0.168627	0.99	0.997	0.00252839	1	cyp11a2
emc10	2.19411e-07	0.274896	0.4	0.057	0.00257677	4	emc10
sod2	2.24942e-07	0.264086	0.357	0.193	0.00264172	1	sod2
dusp2	2.32574e-07	0.345092	0.421	0.263	0.00273135	0	dusp2
slc25a55a	2.34929e-07	0.234336	0.267	0.027	0.002759	4	slc25a55a
zgc:77086	2.36549e-07	0.265958	0.333	0.042	0.00277803	4	zgc:77086
nlrx1	2.4626e-07	0.166466	0.2	0.016	0.00289207	4	nlrx1
ube2l3b	2.47706e-07	0.316278	0.4	0.058	0.00290906	4	ube2l3b
hmgb2b	2.52711e-07	0.634966	0.267	0.105	0.00296783	3	hmgb2b
hmgb1a	2.53808e-07	0.582113	0.5	0.32	0.00298072	3	hmgb1a
nvl	2.54899e-07	0.165343	0.2	0.016	0.00299353	4	nvl
eif4g1a	2.55848e-07	0.331632	0.467	0.078	0.00300468	4	eif4g1a
arid4a	2.61888e-07	0.276654	0.333	0.043	0.00307562	4	arid4a
tsc22d31	2.62023e-07	0.309259	0.575	0.374	0.0030772	1	tsc22d3
prpf18	2.62069e-07	0.20825	0.267	0.029	0.00307773	4	prpf18
si:rp71-68n21.9	2.69958e-07	0.118337	0.133	0.007	0.00317039	4	si:rp71-68n21.9
sash1b	2.69958e-07	0.118337	0.133	0.007	0.00317039	4	sash1b
fancl	2.69958e-07	0.118337	0.133	0.007	0.00317039	4	fancl
si:dkey-30c15.10	2.69958e-07	0.118337	0.133	0.007	0.00317039	4	si:dkey-30c15.10
igf1ra	2.69958e-07	0.118337	0.133	0.007	0.00317039	4	igf1ra
trpm4b.2	2.69958e-07	0.118337	0.133	0.007	0.00317039	4	trpm4b.2
CABZ01038524.1	2.7156e-07	0.206032	0.267	0.029	0.0031892	4	CABZ01038524.1
si:ch211-212o1.2	2.7156e-07	0.206032	0.267	0.029	0.0031892	4	si:ch211-212o1.2
npm1a	2.72121e-07	0.536115	0.371	0.19	0.00319579	3	npm1a
pdgfra	2.77623e-07	0.279364	0.155	0.04	0.0032604	3	pdgfra
n4bp1	2.78393e-07	0.220942	0.213	0.086	0.00326944	1	n4bp1
ssh1b	2.79038e-07	0.117204	0.133	0.007	0.00327703	4	ssh1b
tmx4	2.79038e-07	0.117204	0.133	0.007	0.00327703	4	tmx4
svild1	2.80148e-07	0.290384	0.333	0.042	0.00329006	4	svild
actb1	2.82893e-07	0.26985	0.695	0.566	0.00332229	0	actb1
glmp	2.87406e-07	0.286378	0.333	0.045	0.00337529	4	glmp
ncoa4	2.9748e-07	0.140053	0.121	0.031	0.0034936	1	ncoa4
plod3	2.98019e-07	0.168716	0.133	0.007	0.00349994	4	plod3
drg1	2.98061e-07	0.114942	0.133	0.007	0.00350042	4	drg1
nup37	2.98076e-07	0.16759	0.133	0.007	0.00350061	4	nup37
mdm4	3.04423e-07	0.175496	0.267	0.027	0.00357515	4	mdm4
hnrnpr	3.04449e-07	0.205534	0.333	0.041	0.00357544	4	hnrnpr
fasn	3.05309e-07	0.12652	0.116	0.028	0.00358555	1	fasn
carm1	3.09537e-07	0.204926	0.2	0.016	0.0036352	4	carm1
CR589944.1	3.14894e-07	0.18521	0.267	0.027	0.00369811	4	CR589944.1
cldn7b	3.18314e-07	0.105943	0.133	0.007	0.00373828	4	cldn7b
zgc:195173	3.19393e-07	0.114948	0.121	0.025	0.00375095	3	zgc:195173
vps26c	3.23809e-07	0.156405	0.2	0.016	0.00380281	4	vps26c
tshz3b	3.25777e-07	0.243032	0.333	0.045	0.00382592	4	tshz3b
si:dkey-241l7.6	3.28921e-07	0.243032	0.133	0.007	0.00386285	4	si:dkey-241l7.6
emp3b	3.30387e-07	0.141714	0.161	0.058	0.00388007	0	emp3b
cyp1b11	3.4972e-07	0.321974	0.405	0.2	0.00410711	3	cyp1b1
si:dkey-192g7.3	3.62119e-07	0.161776	0.138	0.032	0.00425272	3	si:dkey-192g7.3
eef1b21	3.73761e-07	0.196601	0.991	0.979	0.00438945	3	eef1b2
stag2b	3.76314e-07	0.184729	0.267	0.103	0.00441943	3	stag2b
atp1b3a	3.90437e-07	0.235419	0.333	0.045	0.00458529	4	atp1b3a
capns1a	3.9324e-07	0.246611	0.467	0.076	0.00461821	4	capns1a
slc38a3b1	4.0438e-07	0.265958	0.4	0.063	0.00474903	4	slc38a3b
snrpg	4.17325e-07	0.21362	0.112	0.022	0.00490106	3	snrpg
plekha7b	4.17581e-07	0.130796	0.213	0.085	0.00490407	1	plekha7b
ergic2	4.19789e-07	0.151861	0.198	0.062	0.00493	3	ergic2
zgc:113054	4.27816e-07	0.150377	0.155	0.04	0.00502427	3	zgc:113054
cavin1b	4.35875e-07	0.224643	0.267	0.029	0.00511891	4	cavin1b
aifm2	4.50112e-07	0.139488	0.207	0.067	0.00528611	3	aifm2
tefa	4.62829e-07	0.319775	0.467	0.079	0.00543547	4	tefa
cox8b	4.64399e-07	0.217355	0.3	0.145	0.0054539	1	cox8b
golph3	4.74707e-07	0.189557	0.267	0.029	0.00557496	4	golph3
laptm4a	4.79283e-07	0.283403	0.314	0.167	0.00562869	1	laptm4a
slmapb	4.85931e-07	0.189542	0.164	0.056	0.00570677	1	slmapb
jcada	4.96053e-07	0.204926	0.267	0.03	0.00582564	4	jcada
srgap2	4.96053e-07	0.204926	0.267	0.03	0.00582564	4	srgap2
BX957362.1	4.96053e-07	0.20382	0.267	0.03	0.00582565	4	BX957362.1
BX927333.1	4.96053e-07	0.20382	0.267	0.03	0.00582565	4	BX927333.1
pcolceb	5.1685e-07	0.135258	0.06	0.005	0.00606988	3	pcolceb
gpatch11	5.31105e-07	0.201612	0.267	0.03	0.00623729	4	gpatch11
clstn1	5.31105e-07	0.201612	0.267	0.03	0.00623729	4	clstn1
arpp19b	5.4442e-07	0.183043	0.267	0.029	0.00639367	4	arpp19b
sfxn5b	5.4948e-07	0.201612	0.267	0.03	0.0064531	4	sfxn5b
fuca2	5.56013e-07	0.116263	0.097	0.02	0.00652982	1	fuca2
ctdsp2	5.62581e-07	0.296856	0.6	0.119	0.00660695	4	ctdsp2
atp5if1a	5.7343e-07	0.452677	0.467	0.081	0.00673437	4	atp5if1a
pagr1	5.88057e-07	0.197212	0.267	0.03	0.00690615	4	pagr1
polr2f	5.98523e-07	0.22414	0.19	0.059	0.00702905	3	polr2f
utp3	6.02412e-07	0.297695	0.333	0.045	0.00707473	4	utp3
si:dkey-209n16.2	6.13693e-07	0.165343	0.2	0.017	0.00720721	4	si:dkey-209n16.2
rab11fip1b	6.13693e-07	0.165343	0.2	0.017	0.00720721	4	rab11fip1b
mettl7a	6.15835e-07	0.122502	0.242	0.105	0.00723236	1	mettl7a
pik3r2	6.15957e-07	0.191153	0.324	0.161	0.00723379	1	pik3r2
mt-nd51	6.27323e-07	0.546711	0.867	0.251	0.00736728	4	mt-nd5
tpt11	6.34622e-07	0.119085	1	1	0.007453	2	tpt1
snip1	6.60087e-07	0.231095	0.333	0.046	0.00775207	4	snip1
f10	6.70839e-07	0.139185	0.138	0.034	0.00787833	3	f10
pim1	6.71209e-07	0.382815	0.28	0.139	0.00788267	1	pim1
s100a10b1	6.76972e-07	0.363334	0.2	0.017	0.00795035	4	s100a10b
eef1db	6.79716e-07	0.162616	0.921	0.845	0.00798259	0	eef1db
smim7	6.83981e-07	0.255113	0.2	0.017	0.00803267	4	smim7
eif1b1	6.84134e-07	0.363405	0.862	0.77	0.00803447	3	eif1b
gpc4	7.01594e-07	0.307173	0.4	0.066	0.00823951	4	gpc4
man2a2	7.04666e-07	0.174245	0.103	0.019	0.0082756	3	man2a2
slmapa	7.22986e-07	0.252906	0.267	0.031	0.00849074	4	slmapa
atp5l	7.32169e-07	0.279348	0.744	0.636	0.0085986	1	atp5l
ip6k2b	7.44024e-07	0.264895	0.267	0.03	0.00873782	4	ip6k2b
arl4ab	7.46259e-07	0.128258	0.129	0.03	0.00876406	3	arl4ab
gtf2h5	7.53046e-07	0.204926	0.2	0.017	0.00884377	4	gtf2h5
snrpb2	7.85848e-07	0.20382	0.2	0.017	0.00922899	4	snrpb2
sft2d3	7.8939e-07	0.206032	0.267	0.031	0.0092706	4	sft2d3
mknk2a	8.03382e-07	0.210531	0.203	0.091	0.00943492	0	mknk2a
lsp11	8.16005e-07	0.204926	0.267	0.031	0.00958316	4	lsp1
rhoab	8.18449e-07	0.329676	0.242	0.11	0.00961187	1	rhoab
g6pc3	8.43454e-07	0.20382	0.267	0.031	0.00990552	4	g6pc3
zgc:114104	8.43454e-07	0.20382	0.267	0.031	0.00990552	4	zgc:114104
retsatl	8.46833e-07	0.351625	0.2	0.017	0.00994521	4	retsatl
egr2a	8.47349e-07	0.206618	0.37	0.212	0.00995126	0	egr2a
abhd17b	8.71764e-07	0.20051	0.267	0.031	0.010238	4	abhd17b
nid1a	9.00953e-07	0.201612	0.267	0.031	0.0105808	4	nid1a
mrpl13	9.02029e-07	0.151965	0.2	0.017	0.0105934	4	mrpl13
sart1	9.0748e-07	0.183043	0.267	0.03	0.0106574	4	sart1
gys1	9.35749e-07	0.261712	0.4	0.066	0.0109894	4	gys1
per1b	9.63894e-07	0.209422	0.217	0.092	0.01132	1	per1b
cbr1l	9.78997e-07	0.219305	0.147	0.039	0.0114973	3	cbr1l
pkma	9.86454e-07	0.452801	0.6	0.135	0.0115849	4	pkma
snrpe	9.89751e-07	0.226103	0.112	0.023	0.0116236	3	snrpe
eif3ba	9.94427e-07	0.179174	0.743	0.629	0.0116786	0	eif3ba
hspa9	1.00701e-06	0.280166	0.467	0.082	0.0118263	4	hspa9
cnp	1.08311e-06	0.338615	0.333	0.046	0.0127201	4	cnp
sub1b	1.12566e-06	0.266732	0.4	0.064	0.0132197	4	sub1b
atp5mc3a	1.13378e-06	0.457217	0.733	0.188	0.0133152	4	atp5mc3a
fam120a	1.13483e-06	0.415659	0.467	0.09	0.0133274	4	fam120a
pleca	1.14002e-06	0.303121	0.353	0.175	0.0133884	3	pleca
npm31	1.15697e-06	0.248035	0.333	0.046	0.0135874	4	npm3
atf4b	1.18193e-06	0.221215	0.701	0.555	0.0138805	0	atf4b
tuba1b	1.20055e-06	0.122551	0.095	0.017	0.0140992	3	tuba1b
fosl1a	1.24027e-06	0.212361	0.381	0.223	0.0145657	0	fosl1a
fthl27	1.24685e-06	0.270242	0.899	0.848	0.014643	1	fthl27
gorasp1a	1.25739e-06	0.216049	0.2	0.018	0.0147667	4	gorasp1a
si:zfos-464b6.2	1.2578e-06	0.230016	0.267	0.031	0.0147716	4	si:zfos-464b6.2
rbm4.3	1.266e-06	0.437399	0.533	0.105	0.0148679	4	rbm4.3
her9	1.28e-06	0.409244	0.153	0.056	0.0150324	0	her9
tcp1	1.28051e-06	0.354585	0.414	0.225	0.0150384	3	tcp1
ptk2ab	1.30175e-06	0.204926	0.267	0.032	0.0152878	4	ptk2ab
caap1	1.31378e-06	0.134053	0.164	0.048	0.0154291	3	caap1
itga9	1.35267e-06	0.242153	0.31	0.138	0.0158857	3	itga9
tpd52	1.3909e-06	0.164222	0.2	0.018	0.0163347	4	tpd52
cavin2b	1.41744e-06	0.286161	0.129	0.032	0.0166464	3	cavin2b
CR383676.1	1.41831e-06	0.117878	1	1	0.0166566	1	CR383676.1
mapre3b	1.4436e-06	0.326545	0.467	0.092	0.0169537	4	mapre3b
nid2a	1.44461e-06	0.122781	0.052	0.004	0.0169656	3	nid2a
adnpb	1.45172e-06	0.236503	0.333	0.049	0.017049	4	adnpb
ptbp1a1	1.45362e-06	0.237687	0.467	0.083	0.0170713	4	ptbp1a
nedd1	1.47889e-06	0.161982	0.2	0.018	0.0173681	4	nedd1
gemin4	1.47889e-06	0.160864	0.2	0.018	0.0173681	4	gemin4
piga	1.47926e-06	0.19831	0.267	0.032	0.0173725	4	piga
gas1a	1.50479e-06	0.322014	0.517	0.335	0.0176722	3	gas1a
tra2b	1.51038e-06	0.250703	0.2	0.018	0.0177379	4	tra2b
si:dkey-26m3.3	1.52387e-06	0.117204	0.133	0.008	0.0178964	4	si:dkey-26m3.3
arhgef40	1.52387e-06	0.117204	0.133	0.008	0.0178964	4	arhgef40
neurl1b	1.52387e-06	0.117204	0.133	0.008	0.0178964	4	neurl1b
p2rx4a	1.52387e-06	0.117204	0.133	0.008	0.0178964	4	p2rx4a
mrps9	1.52701e-06	0.19941	0.267	0.032	0.0179332	4	mrps9
krt15	1.55357e-06	0.438385	0.052	0.004	0.0182451	3	krt15
ifnphi1	1.56922e-06	0.116072	0.133	0.008	0.0184289	4	ifnphi1
cebpb	1.57163e-06	0.777638	0.259	0.111	0.0184573	3	cebpb
thbs4b	1.57203e-06	0.158632	0.2	0.018	0.018462	4	thbs4b
clic4	1.59905e-06	0.180457	0.19	0.061	0.0187792	3	clic4
tmem238a	1.61581e-06	0.114942	0.133	0.008	0.0189761	4	tmem238a
polr3h	1.6637e-06	0.166466	0.133	0.008	0.0195385	4	polr3h
cdc14b	1.6709e-06	0.204926	0.2	0.018	0.019623	4	cdc14b
itm2bb1	1.67529e-06	0.402275	0.5	0.305	0.0196745	3	itm2bb
mrpl20	1.70455e-06	0.204926	0.2	0.018	0.0200183	4	mrpl20
mob1ba	1.71286e-06	0.112684	0.133	0.008	0.0201158	4	mob1ba
hars	1.73289e-06	0.191739	0.267	0.032	0.0203511	4	hars
gpn2	1.76344e-06	0.110432	0.133	0.008	0.0207098	4	gpn2
ptmab	1.76675e-06	0.680186	0.552	0.404	0.0207487	3	ptmab
drap1	1.81878e-06	0.314766	0.667	0.15	0.0213597	4	drap1
stk17al	1.81971e-06	0.108039	0.068	0.01	0.0213706	1	stk17al
mrps25	1.82864e-06	0.19941	0.2	0.018	0.0214756	4	mrps25
sucla2	1.84512e-06	0.191739	0.267	0.032	0.0216691	4	sucla2
chac1	1.84944e-06	0.358974	0.308	0.177	0.0217199	0	chac1
kdelr2a	1.86622e-06	0.195019	0.2	0.018	0.0219169	4	kdelr2a
zranb2	1.8724e-06	0.257852	0.138	0.037	0.0219894	3	zranb2
zgc:77056	1.87857e-06	0.259596	0.4	0.07	0.0220619	4	zgc:77056
itm2bb	1.8819e-06	0.270467	0.459	0.291	0.0221011	1	itm2bb
ctsla	1.93879e-06	0.391069	0.418	0.287	0.0227691	0	ctsla
arrdc3a	1.95424e-06	0.656091	0.667	0.185	0.0229506	4	arrdc3a
si:ch1073-392o20.2	1.98638e-06	0.122439	0.112	0.025	0.023328	3	si:ch1073-392o20.2
washc2c	2.00216e-06	0.147545	0.2	0.018	0.0235133	4	washc2c
nop58	2.043e-06	0.293803	0.302	0.135	0.023993	3	nop58
porb	2.05592e-06	0.233828	0.502	0.341	0.0241447	1	porb
sox4a.1	2.06241e-06	0.230116	0.112	0.025	0.024221	3	sox4a.1
leo1	2.06305e-06	0.144243	0.2	0.018	0.0242285	4	leo1
dusp1	2.07111e-06	0.311338	0.367	0.208	0.0243232	1	dusp1
ppdpfb	2.14388e-06	0.751253	0.686	0.617	0.0251777	1	ppdpfb
arhgef4	2.14965e-06	0.251175	0.4	0.07	0.0252454	4	arhgef4
prelid3b	2.1599e-06	0.272545	0.425	0.268	0.0253659	1	prelid3b
abl2	2.16496e-06	0.141663	0.138	0.036	0.0254253	3	abl2
acbd3	2.2194e-06	0.233254	0.333	0.05	0.0260646	4	acbd3
gpx4a	2.2304e-06	0.178713	0.261	0.12	0.0261938	1	gpx4a
tjp1a	2.23279e-06	0.205131	0.213	0.094	0.0262219	1	tjp1a
rnaseka	2.23477e-06	0.146375	0.145	0.048	0.0262452	1	rnaseka
mcl1b1	2.2495e-06	0.417586	0.467	0.089	0.0264181	4	mcl1b
ints2	2.28608e-06	0.20051	0.267	0.033	0.0268478	4	ints2
slc27a1a	2.30415e-06	0.336615	0.467	0.091	0.02706	4	slc27a1a
farsb	2.30595e-06	0.305059	0.4	0.072	0.0270811	4	farsb
letm2	2.36309e-06	0.28623	0.4	0.07	0.0277521	4	letm2
FAT4	2.39216e-06	0.139817	0.271	0.133	0.0280936	1	FAT4
eef2b1	2.44701e-06	0.154392	1	0.994	0.0287377	3	eef2b
cxcl18b1	2.46264e-06	0.478731	0.31	0.138	0.0289212	3	cxcl18b
pomp	2.46329e-06	0.311341	0.241	0.098	0.0289289	3	pomp
irf2bp2b	2.47345e-06	0.186685	0.458	0.298	0.0290482	0	irf2bp2b
boc	2.49962e-06	0.117439	0.121	0.028	0.0293555	3	boc
snrpb	2.5067e-06	0.435045	0.216	0.083	0.0294387	3	snrpb
rhov	2.52993e-06	0.281229	0.488	0.341	0.0297114	1	rhov
hnrnpa0l.1	2.56755e-06	0.533958	0.509	0.361	0.0301533	3	hnrnpa0l.1
bhmt	2.58833e-06	0.246273	0.121	0.037	0.0303973	1	bhmt
pbx4	2.63847e-06	0.238674	0.333	0.048	0.0309862	4	pbx4
wu:fc75a09	2.66222e-06	0.26162	0.467	0.088	0.0312652	4	wu:fc75a09
cdkn2aip	2.67329e-06	0.236503	0.333	0.051	0.0313951	4	cdkn2aip
rpl37	2.67329e-06	0.236503	0.333	0.051	0.0313951	4	rpl37
plxna4	2.69802e-06	0.236477	0.464	0.308	0.0316855	1	plxna4
hsp90ab11	2.88222e-06	0.106565	1	1	0.0338488	2	hsp90ab1
si:ch211-214j24.10	2.91699e-06	0.259444	0.216	0.08	0.0342572	3	si:ch211-214j24.10
si:ch73-248e21.1	2.91984e-06	0.191739	0.267	0.033	0.0342906	4	si:ch73-248e21.1
ntmt1	2.97977e-06	0.156993	0.19	0.065	0.0349945	3	ntmt1
tcf3b	2.99518e-06	0.157297	0.241	0.095	0.0351754	3	tcf3b
rabac1	3.02603e-06	0.20936	0.2	0.019	0.0355377	4	rabac1
dad1	3.0496e-06	0.370863	0.207	0.076	0.0358145	3	dad1
cops7a	3.08486e-06	0.252906	0.2	0.019	0.0362286	4	cops7a
coq8a	3.09631e-06	0.213606	0.251	0.121	0.036363	1	coq8a
tp53inp11	3.12916e-06	0.38961	0.533	0.12	0.0367488	4	tp53inp1
zgc:174863	3.13604e-06	0.234876	0.241	0.095	0.0368296	3	zgc:174863
ptges3a	3.24889e-06	0.204483	0.333	0.049	0.038155	4	ptges3a
si:ch211-133n4.4	3.31639e-06	0.148288	0.207	0.075	0.0389477	3	si:ch211-133n4.4
rpl4	3.32803e-06	0.123791	0.986	0.966	0.0390844	0	rpl4
ctdsplb	3.34312e-06	0.201612	0.267	0.034	0.0392615	4	ctdsplb
ddx55	3.34312e-06	0.201612	0.267	0.034	0.0392615	4	ddx55
mef2aa	3.34499e-06	0.296647	0.4	0.073	0.0392836	4	mef2aa
dldh	3.44801e-06	0.216335	0.42	0.246	0.0404934	1	dldh
2020-09-02	3.59516e-06	0.20051	0.2	0.019	0.0422215	4	2020-09-02
tjap1	3.61979e-06	0.235419	0.333	0.053	0.0425109	4	tjap1
psip1b	3.6706e-06	0.162739	0.19	0.063	0.0431075	3	psip1b
sh3gl3b	3.69917e-06	0.19941	0.2	0.019	0.0434431	4	sh3gl3b
gtpbp41	3.74006e-06	0.216266	0.94	0.855	0.0439233	2	gtpbp4
smarca4a	3.76955e-06	0.19941	0.2	0.019	0.0442696	4	smarca4a
clpxa	3.81462e-06	0.134084	0.266	0.13	0.0447989	1	clpxa
arrdc3b	3.84291e-06	0.275128	0.329	0.178	0.0451311	1	arrdc3b
cnot9	3.88156e-06	0.195019	0.267	0.034	0.045585	4	cnot9
socs3a1	3.89186e-06	0.580746	0.707	0.569	0.045706	3	socs3a
rpz5	3.92642e-06	0.223998	0.266	0.127	0.0461119	1	rpz5
eif4bb	4.02716e-06	0.264526	0.467	0.088	0.047295	4	eif4bb
arih2	4.06469e-06	0.264573	0.43	0.263	0.0477357	1	arih2
mycb1	4.14311e-06	0.424034	0.879	0.693	0.0486567	3	mycb
eef2b	4.29601e-06	0.111563	0.997	0.993	0.0504524	0	eef2b
nanos1	4.31039e-06	0.111308	0.086	0.015	0.0506212	3	nanos1
psma1	4.43184e-06	0.319688	0.414	0.23	0.0520476	3	psma1
igf1rb	4.45284e-06	0.233991	0.454	0.298	0.0522942	1	igf1rb
sugt1	4.47198e-06	0.139857	0.2	0.019	0.0525189	4	sugt1
ier2b1	4.7101e-06	0.244382	0.889	0.753	0.0553154	1	ier2b
mt-nd11	4.73042e-06	0.758819	1	0.418	0.055554	4	mt-nd1
si:dkey-7j14.6	4.81108e-06	0.449949	0.526	0.387	0.0565013	3	si:dkey-7j14.6
aldh7a1	4.8904e-06	0.258166	0.386	0.238	0.0574329	1	aldh7a1
schip1	4.95148e-06	0.245616	0.467	0.092	0.0581501	4	schip1
bysl	5.02109e-06	0.32425	0.267	0.035	0.0589676	4	bysl
znf1007	5.07269e-06	0.20051	0.267	0.035	0.0595737	4	znf1007
tra2a1	5.07308e-06	0.305147	0.467	0.091	0.0595783	4	tra2a
eif4a1b	5.15293e-06	0.146701	0.904	0.801	0.0605161	0	eif4a1b
sox9b	5.20875e-06	0.180968	0.198	0.086	0.0611715	1	sox9b
agfg1b	5.22241e-06	0.19941	0.267	0.035	0.061332	4	agfg1b
ndufb3	5.2995e-06	0.136097	0.164	0.061	0.0622374	1	ndufb3
hspa5	5.3428e-06	0.371899	0.324	0.181	0.0627458	1	hspa5
edem1	5.3762e-06	0.197212	0.267	0.035	0.0631381	4	edem1
slc35a4	5.40781e-06	0.274896	0.467	0.098	0.0635093	4	slc35a4
CABZ01061894.1	5.47002e-06	0.227864	0.333	0.054	0.0642399	4	CABZ01061894.1
aebp2	5.50666e-06	0.173231	0.133	0.009	0.0646702	4	aebp2
kng1	5.50666e-06	0.173231	0.133	0.009	0.0646702	4	kng1
tomm22	5.51377e-06	0.224643	0.267	0.034	0.0647537	4	tomm22
pdcd10b	5.51945e-06	0.178723	0.267	0.034	0.0648204	4	pdcd10b
tapbpl	5.53414e-06	0.197212	0.267	0.035	0.064993	4	tapbpl
si:dkey-239h2.3	5.54587e-06	0.281062	0.333	0.051	0.0651307	4	si:dkey-239h2.3
zgc:85789	5.63747e-06	0.227864	0.333	0.054	0.0662064	4	zgc:85789
si:ch73-109d9.1	5.67252e-06	0.161982	0.2	0.021	0.0666181	4	si:ch73-109d9.1
ahcyl1	5.67252e-06	0.161982	0.2	0.021	0.0666181	4	ahcyl1
hexdc	5.67252e-06	0.161982	0.2	0.021	0.0666181	4	hexdc
mtmr11	5.83153e-06	0.160864	0.2	0.021	0.0684855	4	mtmr11
rel	5.99464e-06	0.159747	0.2	0.021	0.0704011	4	rel
nrp1a	5.99464e-06	0.159747	0.2	0.021	0.0704011	4	nrp1a
si:ch211-196h24.1	6.11594e-06	0.116072	0.133	0.009	0.0718256	4	si:ch211-196h24.1
igfbp2a	6.11594e-06	0.116072	0.133	0.009	0.0718256	4	igfbp2a
cobll1b	6.11594e-06	0.116072	0.133	0.009	0.0718256	4	cobll1b
si:ch211-269k10.2	6.11594e-06	0.116072	0.133	0.009	0.0718256	4	si:ch211-269k10.2
BX547930.4	6.11594e-06	0.116072	0.133	0.009	0.0718256	4	BX547930.4
arhgap12b	6.11594e-06	0.116072	0.133	0.009	0.0718256	4	arhgap12b
zgc:112083	6.11594e-06	0.116072	0.133	0.009	0.0718256	4	zgc:112083
ndufa3	6.12458e-06	0.278765	0.667	0.16	0.0719271	4	ndufa3
znf609b	6.13549e-06	0.204051	0.267	0.117	0.0720552	3	znf609b
timm17a	6.19449e-06	0.174422	0.267	0.034	0.0727481	4	timm17a
slc29a4	6.23549e-06	0.285473	0.31	0.155	0.0732296	3	slc29a4
map3k7	6.26711e-06	0.208694	0.333	0.053	0.0736009	4	map3k7
si:ch211-256e16.11	6.27901e-06	0.114942	0.133	0.009	0.0737407	4	si:ch211-256e16.11
si:dkey-83k24.5	6.27901e-06	0.114942	0.133	0.009	0.0737407	4	si:dkey-83k24.5
zgc:101016	6.28008e-06	0.217168	0.133	0.009	0.0737533	4	zgc:101016
vamp3	6.36928e-06	0.415846	0.733	0.209	0.0748009	4	vamp3
manea	6.60921e-06	0.232174	0.333	0.055	0.0776186	4	manea
adsl	6.70419e-06	0.164222	0.133	0.009	0.078734	4	adsl
si:dkeyp-98a7.3	6.79262e-06	0.258434	0.133	0.009	0.0797725	4	si:dkeyp-98a7.3
cracr2b	6.94598e-06	0.220061	0.652	0.504	0.0815736	1	cracr2b
cdc34a	6.97198e-06	0.110432	0.133	0.009	0.0818789	4	cdc34a
ttf2	6.97216e-06	0.109308	0.133	0.009	0.0818811	4	ttf2
utp4	6.97216e-06	0.109308	0.133	0.009	0.0818811	4	utp4
plrg1	7.06524e-06	0.149753	0.2	0.021	0.0829742	4	plrg1
fosl1a1	7.18914e-06	0.511602	0.422	0.266	0.0844292	3	fosl1a
rbm47	7.21472e-06	0.108555	0.203	0.089	0.0847296	1	rbm47
ost41	7.22058e-06	0.321399	0.333	0.054	0.0847985	4	ost4
dynll2b	7.27207e-06	0.330682	0.267	0.035	0.0854032	4	dynll2b
snrnp70	7.34807e-06	0.169072	0.267	0.034	0.0862958	4	snrnp70
echs1	7.3909e-06	0.199233	0.382	0.219	0.0867988	1	echs1
psmd11a	7.53753e-06	0.105943	0.133	0.009	0.0885208	4	psmd11a
zp3a.2	7.53858e-06	0.321026	0.133	0.009	0.0885331	4	zp3a.2
kidins220a	7.68042e-06	0.122817	0.106	0.031	0.0901988	1	kidins220a
ppp1r3cb	7.7235e-06	0.100667	0.174	0.07	0.0907048	1	ppp1r3cb
rnf2	7.75376e-06	0.177917	0.155	0.048	0.0910601	3	rnf2
mid1ip1l1	8.01905e-06	0.301896	0.2	0.021	0.0941757	4	mid1ip1l
wasla	8.01942e-06	0.250127	0.333	0.054	0.0941801	4	wasla
kri1	8.31038e-06	0.142048	0.2	0.021	0.0975971	4	kri1
marcksl1b	8.43272e-06	0.101973	0.095	0.019	0.0990338	3	marcksl1b
ccn2a	8.46039e-06	0.249596	0.052	0.005	0.0993589	3	ccn2a
psmd71	8.48243e-06	0.218233	0.267	0.035	0.0996177	4	psmd7
rpz3	8.4999e-06	0.250703	0.267	0.038	0.0998228	4	rpz3
si:ch211-271b14.1	8.53365e-06	0.145343	0.2	0.021	0.100219	4	si:ch211-271b14.1
slc20a1b	8.65949e-06	0.264307	0.217	0.102	0.101697	1	slc20a1b
mcm61	8.76553e-06	0.258434	0.2	0.022	0.102942	4	mcm6
pam	8.82065e-06	0.301896	0.4	0.08	0.10359	4	pam
cux1a	8.87809e-06	0.3263	0.466	0.289	0.104264	3	cux1a
si:ch211-210c8.6	8.912e-06	0.228939	0.333	0.056	0.104663	4	si:ch211-210c8.6
eif4ebp3	9.01636e-06	0.484323	0.629	0.532	0.105888	3	eif4ebp3
b2m	9.09535e-06	0.28426	0.913	0.905	0.106816	1	b2m
boc1	9.15447e-06	0.189557	0.267	0.037	0.10751	4	boc
serpinh1b	9.22842e-06	0.660557	0.19	0.071	0.108379	3	serpinh1b
edil3a	9.37233e-06	0.133644	0.198	0.086	0.110069	1	edil3a
pwp2h	9.37648e-06	0.11949	0.164	0.053	0.110117	3	pwp2h
zeb2b	9.42931e-06	0.123338	0.147	0.044	0.110738	3	zeb2b
zgc:92481	9.54137e-06	0.115024	0.203	0.091	0.112054	1	zgc:92481
ppp1r12a	9.6889e-06	0.269155	0.267	0.037	0.113786	4	ppp1r12a
eif6	9.75809e-06	0.228295	0.198	0.075	0.114599	3	eif6
znf576.2	9.82046e-06	0.269155	0.267	0.037	0.115331	4	znf576.2
odf2a	9.82654e-06	0.116129	0.138	0.04	0.115403	3	odf2a
ncl1	9.9658e-06	0.543901	0.867	0.276	0.117038	4	ncl
rgs16	9.96694e-06	0.230952	0.234	0.127	0.117052	0	rgs16
capza1b	1.01477e-05	0.169724	0.174	0.072	0.119175	1	capza1b
zgc:162698	1.01619e-05	0.125403	0.181	0.063	0.119341	3	zgc:162698
dnajc15	1.02185e-05	0.133674	0.181	0.063	0.120006	3	dnajc15
odc1	1.04547e-05	0.120223	0.082	0.019	0.12278	1	odc1
rcn1	1.06012e-05	0.232174	0.333	0.057	0.124501	4	rcn1
si:ch211-108c17.2	1.07005e-05	0.159747	0.2	0.022	0.125667	4	si:ch211-108c17.2
nupr1b1	1.07321e-05	0.273897	0.928	0.835	0.126037	1	nupr1b
bckdk	1.09142e-05	0.245655	0.6	0.138	0.128176	4	bckdk
h3f3b.1	1.09838e-05	0.353893	0.586	0.457	0.128993	3	h3f3b.1
ddx39ab	1.10586e-05	0.282759	0.121	0.032	0.129872	3	ddx39ab
selenop	1.11149e-05	0.250953	0.71	0.627	0.130534	1	selenop
zgc:113314	1.12771e-05	0.155293	0.2	0.022	0.132438	4	zgc:113314
slc38a3b	1.13108e-05	0.106315	0.135	0.048	0.132835	1	slc38a3b
pim21	1.13844e-05	0.262507	0.467	0.094	0.133698	4	pim2
aktip	1.13992e-05	0.263833	0.267	0.037	0.133872	4	aktip
zfand5b	1.15091e-05	0.342991	0.242	0.123	0.135163	1	zfand5b
psma8	1.1538e-05	0.30608	0.336	0.177	0.135503	3	psma8
met	1.15449e-05	0.168802	0.259	0.114	0.135583	3	met
znf219	1.1576e-05	0.155293	0.2	0.022	0.135948	4	znf219
ddx47	1.1649e-05	0.222502	0.267	0.037	0.136806	4	ddx47
tmem591	1.1764e-05	0.336999	0.533	0.123	0.138156	4	tmem59
zgc:153867	1.18178e-05	0.456398	0.667	0.179	0.138789	4	zgc:153867
spink2.1	1.19886e-05	0.15879	0.106	0.031	0.140795	1	spink2.1
gpt2l	1.22071e-05	0.273433	0.333	0.058	0.143361	4	gpt2l
CR383676.11	1.23158e-05	0.132153	1	1	0.144637	3	CR383676.1
sec22ba	1.23612e-05	0.145254	0.181	0.065	0.14517	3	sec22ba
atp6v1e1b	1.24705e-05	0.121579	0.145	0.053	0.146454	1	atp6v1e1b
dgcr6	1.25167e-05	0.151965	0.2	0.022	0.146996	4	dgcr6
cndp2	1.25215e-05	0.190647	0.267	0.038	0.147052	4	cndp2
stxbp2	1.25218e-05	0.195019	0.2	0.022	0.147056	4	stxbp2
ddx23	1.25235e-05	0.112391	0.138	0.04	0.147075	3	ddx23
fam171a2a	1.2588e-05	0.114786	0.164	0.054	0.147833	3	fam171a2a
cox6a2	1.26155e-05	0.214	0.773	0.747	0.148156	1	cox6a2
cct6a	1.26708e-05	0.162269	0.65	0.52	0.148806	0	cct6a
zeb2a	1.27806e-05	0.132813	0.251	0.127	0.150096	1	zeb2a
rarga	1.2944e-05	0.102129	0.145	0.054	0.152014	1	rarga
ms4a17a.5	1.30706e-05	0.208767	0.362	0.194	0.153501	3	ms4a17a.5
asb11	1.30925e-05	0.162713	0.254	0.142	0.153759	0	asb11
calr3a	1.3293e-05	0.213573	0.164	0.055	0.156113	3	calr3a
nkain1	1.33085e-05	0.134642	0.112	0.028	0.156295	3	nkain1
glo1	1.34505e-05	0.227204	0.181	0.066	0.157963	3	glo1
si:ch73-376l24.6	1.35276e-05	0.145343	0.2	0.022	0.158868	4	si:ch73-376l24.6
selenow1	1.3554e-05	0.268477	0.3	0.167	0.159178	1	selenow1
il151	1.36459e-05	0.191739	0.2	0.022	0.160257	4	il15
tcea1	1.376e-05	0.193924	0.2	0.022	0.161598	4	tcea1
coro1ca	1.38056e-05	0.171208	0.267	0.037	0.162133	4	coro1ca
ndnf	1.38263e-05	0.249047	0.449	0.288	0.162376	1	ndnf
cyp1b1	1.41256e-05	0.108553	0.308	0.173	0.165891	0	cyp1b1
slc16a10	1.41277e-05	0.17326	0.671	0.49	0.165916	1	slc16a10
tgfbr3	1.41316e-05	0.133958	0.29	0.158	0.165961	1	tgfbr3
rab7a	1.41844e-05	0.170139	0.267	0.037	0.166582	4	rab7a
ch25hl31	1.41938e-05	0.1574	0.267	0.037	0.166692	4	ch25hl3
dnajc19	1.42425e-05	0.145343	0.2	0.022	0.167264	4	dnajc19
uri11	1.42498e-05	0.269155	0.267	0.038	0.16735	4	uri1
pa2g4b	1.4325e-05	0.182322	0.4	0.072	0.168233	4	pa2g4b
gadd45ab1	1.44403e-05	0.356899	0.276	0.132	0.169587	3	gadd45ab
arhgef18a	1.44694e-05	0.14236	0.207	0.08	0.169928	3	arhgef18a
fam168a	1.45011e-05	0.207597	0.302	0.15	0.1703	3	fam168a
atp1b1a	1.45584e-05	0.401621	0.638	0.573	0.170974	1	atp1b1a
supt4h1	1.45709e-05	0.169072	0.267	0.037	0.171121	4	supt4h1
si:ch1073-459j12.1	1.47924e-05	0.150686	0.155	0.052	0.173722	3	si:ch1073-459j12.1
ddx21	1.49169e-05	0.161963	0.701	0.585	0.175184	0	ddx21
errfi1a1	1.50112e-05	0.376438	0.4	0.082	0.176292	4	errfi1a
eif3ha	1.50724e-05	0.137353	0.78	0.663	0.17701	0	eif3ha
fosb	1.5134e-05	0.108701	0.929	0.775	0.177733	0	fosb
ccbe1	1.5262e-05	0.158563	0.164	0.055	0.179237	3	ccbe1
cpne1	1.52714e-05	0.280403	0.533	0.12	0.179347	4	cpne1
col5a2a	1.52782e-05	0.104972	0.078	0.014	0.179427	3	col5a2a
uba1	1.52902e-05	0.157687	0.198	0.088	0.179568	1	uba1
canx	1.55286e-05	0.226499	0.138	0.043	0.182367	3	canx
plekha61	1.55557e-05	0.329646	0.4	0.083	0.182686	4	plekha6
sod1	1.56022e-05	0.245704	0.493	0.336	0.183233	1	sod1
phb	1.56732e-05	0.158185	0.135	0.048	0.184066	1	phb
si:ch211-262i1.5	1.56909e-05	0.224643	0.333	0.058	0.184274	4	si:ch211-262i1.5
ncor11	1.59735e-05	0.242635	0.4	0.075	0.187592	4	ncor1
golga7	1.60971e-05	0.416658	0.6	0.159	0.189044	4	golga7
ednrab	1.61336e-05	0.224643	0.333	0.058	0.189473	4	ednrab
map1lc3a	1.61764e-05	0.166107	0.213	0.098	0.189976	1	map1lc3a
alkbh3.1	1.6252e-05	0.349643	0.536	0.395	0.190863	1	alkbh3.1
prickle1b	1.66749e-05	0.171901	0.164	0.057	0.19583	3	prickle1b
hdac4	1.68865e-05	0.273872	0.467	0.107	0.198316	4	hdac4
mob4	1.71724e-05	0.109943	0.126	0.042	0.201673	1	mob4
zgc:194207	1.72009e-05	0.1721	0.133	0.01	0.202008	4	zgc:194207
mt-nd31	1.72236e-05	0.509654	0.667	0.196	0.202274	4	mt-nd3
mprip	1.73023e-05	0.191739	0.267	0.039	0.203198	4	mprip
atf7ip1	1.76839e-05	0.2367	0.4	0.075	0.20768	4	atf7ip
si:dkey-67c22.2	1.77896e-05	0.198389	0.224	0.092	0.208921	3	si:dkey-67c22.2
lsm4	1.78073e-05	0.172052	0.155	0.05	0.209129	3	lsm4
etfa	1.79374e-05	0.204083	0.4	0.074	0.210657	4	etfa
pdia3	1.79476e-05	0.184012	0.638	0.536	0.210776	0	pdia3
alyref	1.7949e-05	0.295437	0.129	0.037	0.210793	3	alyref
sh3gl3a	1.81388e-05	0.109416	0.192	0.093	0.213022	0	sh3gl3a
BOLA2	1.82611e-05	0.218289	0.133	0.01	0.214459	4	BOLA2
mknk2b1	1.84232e-05	0.356126	0.933	0.289	0.216362	4	mknk2b
txndc12	1.84612e-05	0.210362	0.259	0.121	0.216809	3	txndc12
rpf2	1.85565e-05	0.216105	0.267	0.038	0.217927	4	rpf2
msrb3	1.88941e-05	0.224643	0.333	0.059	0.221893	4	msrb3
ier3ip1	1.89047e-05	0.138728	0.129	0.037	0.222017	3	ier3ip1
ch25hl3	1.89647e-05	0.212138	0.112	0.03	0.222722	3	ch25hl3
vdac1	1.90464e-05	0.253824	0.241	0.106	0.223681	3	vdac1
arl4d	1.90527e-05	0.210578	0.559	0.425	0.223755	0	arl4d
urb2	1.91131e-05	0.157518	0.2	0.023	0.224464	4	urb2
lnx2a	1.91131e-05	0.156405	0.2	0.023	0.224464	4	lnx2a
kdm5c	1.91343e-05	0.246312	0.2	0.023	0.224714	4	kdm5c
bin2b	1.91434e-05	0.114942	0.133	0.01	0.22482	4	bin2b
mbnl1	1.91434e-05	0.114942	0.133	0.01	0.22482	4	mbnl1
cdk20	1.91434e-05	0.114942	0.133	0.01	0.22482	4	cdk20
p4ha1a	1.91434e-05	0.114942	0.133	0.01	0.22482	4	p4ha1a
slc37a4b.1	1.91434e-05	0.114942	0.133	0.01	0.22482	4	slc37a4b.1
lig1	1.93778e-05	0.214931	0.133	0.01	0.227573	4	lig1
jam3b	1.94333e-05	0.138906	0.259	0.116	0.228225	3	jam3b
fmr1	1.95523e-05	0.243864	0.333	0.057	0.229622	4	fmr1
caska	1.95972e-05	0.155293	0.2	0.023	0.230149	4	caska
atp1b1a1	1.9943e-05	0.604188	1	0.581	0.234211	4	atp1b1a
vamp4	2.00923e-05	0.155293	0.2	0.023	0.235964	4	vamp4
gps2	2.05615e-05	0.163101	0.133	0.01	0.241475	4	gps2
sephs2	2.08034e-05	0.163101	0.133	0.01	0.244315	4	sephs2
dclre1c	2.09705e-05	0.141079	0.256	0.136	0.246278	1	dclre1c
ubxn1	2.10552e-05	0.157518	0.133	0.01	0.247273	4	ubxn1
atpaf2	2.11171e-05	0.153073	0.2	0.023	0.247999	4	atpaf2
si:ch211-197h24.9	2.12814e-05	0.354672	0.31	0.163	0.249929	3	si:ch211-197h24.9
ppp1r10	2.15926e-05	0.158563	0.121	0.034	0.253583	3	ppp1r10
kdelr2b	2.17565e-05	0.197462	0.155	0.052	0.255508	3	kdelr2b
si:ch211-130m23.5	2.17665e-05	0.196115	0.267	0.04	0.255626	4	si:ch211-130m23.5
si:ch211-106e7.2	2.18116e-05	0.159747	0.133	0.01	0.256155	4	si:ch211-106e7.2
glyr1	2.19143e-05	0.189884	0.333	0.056	0.257362	4	glyr1
idh3b	2.19473e-05	0.151115	0.135	0.05	0.257749	1	idh3b
inhbaa	2.20299e-05	0.283599	0.181	0.088	0.258719	0	inhbaa
coil	2.20718e-05	0.108185	0.133	0.01	0.259211	4	coil
si:ch73-141c7.1	2.22947e-05	0.236009	0.348	0.211	0.261829	1	si:ch73-141c7.1
mrm1	2.23377e-05	0.195019	0.267	0.04	0.262334	4	mrm1
depdc5	2.23377e-05	0.195019	0.267	0.04	0.262334	4	depdc5
si:dkeyp-120h9.1	2.23659e-05	0.124442	0.164	0.057	0.262665	3	si:dkeyp-120h9.1
sf3a3	2.23699e-05	0.197212	0.2	0.023	0.262712	4	sf3a3
daam1a	2.24879e-05	0.175811	0.198	0.076	0.264098	3	daam1a
pqbp1	2.25997e-05	0.103706	0.133	0.01	0.265411	4	pqbp1
ctsba	2.26488e-05	0.231478	0.15	0.058	0.265988	1	ctsba
rpl41	2.2718e-05	0.140518	1	0.967	0.2668	2	rpl4
ppp5c	2.29226e-05	0.193924	0.267	0.04	0.269204	4	ppp5c
hmgb3a	2.30324e-05	0.266628	0.517	0.357	0.270493	3	hmgb3a
ypel3	2.31362e-05	0.104823	0.133	0.01	0.271712	4	ypel3
emb	2.31871e-05	0.135081	0.172	0.08	0.272309	0	emb
sec24c	2.32256e-05	0.226789	0.333	0.061	0.272762	4	sec24c
tmem161b	2.35216e-05	0.191739	0.267	0.04	0.276237	4	tmem161b
ppiab	2.45157e-05	0.230869	0.905	0.843	0.287913	3	ppiab
prpf19	2.46798e-05	0.190647	0.2	0.023	0.289839	4	prpf19
cd99l2	2.57372e-05	0.289344	0.4	0.086	0.302258	4	cd99l2
cish	2.58386e-05	0.146353	0.103	0.026	0.303449	3	cish
cth	2.58623e-05	0.222502	0.333	0.061	0.303727	4	cth
s100u	2.61452e-05	0.144444	0.124	0.048	0.307049	0	s100u
uqcrc1	2.62423e-05	0.304567	0.8	0.228	0.30819	4	uqcrc1
mrpl47	2.63473e-05	0.142048	0.2	0.023	0.309423	4	mrpl47
cct31	2.63612e-05	0.34345	0.8	0.239	0.309586	4	cct3
cul4b	2.72242e-05	0.235574	0.333	0.058	0.319721	4	cul4b
egr1	2.74873e-05	0.129019	0.811	0.65	0.322811	0	egr1
dop1b	2.79275e-05	0.100751	0.145	0.057	0.327981	1	dop1b
myclb	2.8138e-05	0.225247	0.568	0.447	0.330453	0	myclb
asap3	2.81821e-05	0.117334	0.407	0.266	0.330971	0	asap3
serinc1	2.82862e-05	0.178183	0.333	0.189	0.332193	1	serinc1
lysmd3	2.85835e-05	0.238674	0.267	0.041	0.335685	4	lysmd3
narf	2.99501e-05	0.195019	0.267	0.041	0.351734	4	narf
mcl1a	3.02197e-05	0.164576	0.712	0.559	0.3549	0	mcl1a
syne1a	3.02885e-05	0.158632	0.2	0.024	0.355708	4	syne1a
rab5aa	3.05575e-05	0.156346	0.267	0.039	0.358867	4	rab5aa
gclm	3.07384e-05	0.24456	0.328	0.169	0.360992	3	gclm
ncl	3.09977e-05	0.394144	0.422	0.266	0.364038	3	ncl
carnmt1	3.10247e-05	0.157518	0.2	0.024	0.364354	4	carnmt1
strn	3.10247e-05	0.157518	0.2	0.024	0.364354	4	strn
AL954741.2	3.10247e-05	0.157518	0.2	0.024	0.364354	4	AL954741.2
dhx57	3.10247e-05	0.156405	0.2	0.024	0.364354	4	dhx57
psmd14	3.1308e-05	0.164812	0.267	0.039	0.367681	4	psmd14
arf6b	3.14971e-05	0.192831	0.267	0.041	0.369902	4	arf6b
mipep	3.14971e-05	0.192831	0.267	0.041	0.369902	4	mipep
spon1b	3.17771e-05	0.156405	0.2	0.024	0.37319	4	spon1b
plk3	3.19108e-05	0.252223	0.267	0.04	0.37476	4	plk3
pdk2a	3.23578e-05	0.220365	0.333	0.062	0.38001	4	pdk2a
ddx51	3.25162e-05	0.3914	0.31	0.168	0.38187	3	ddx5
ip6k2a	3.26158e-05	0.101314	0.129	0.039	0.38304	3	ip6k2a
nhp2	3.29273e-05	0.162689	0.267	0.039	0.386698	4	nhp2
ywhae1	3.29823e-05	0.332936	0.667	0.183	0.387344	4	ywhae1
col12a1b	3.33916e-05	0.144988	0.19	0.074	0.392151	3	col12a1b
ppp1r1b	3.33916e-05	0.144988	0.19	0.074	0.392151	3	ppp1r1b
gb:bc139872	3.35608e-05	0.260653	0.333	0.063	0.394138	4	gb:bc139872
tob1a	3.41925e-05	0.375761	0.467	0.11	0.401557	4	tob1a
tmem59	3.46138e-05	0.151143	0.217	0.104	0.406504	1	tmem59
smarcc2	3.48017e-05	0.240747	0.4	0.086	0.408711	4	smarcc2
si:dkey-88p24.11	3.49556e-05	0.147545	0.2	0.024	0.410519	4	si:dkey-88p24.11
atp6ap2	3.5642e-05	0.122183	0.116	0.039	0.418579	1	atp6ap2
si:dkey-188i13.11	3.58102e-05	0.318882	0.2	0.024	0.420555	4	si:dkey-188i13.11
cd164	3.59509e-05	0.109733	0.145	0.056	0.422207	1	cd164
tmem176l.1	3.59762e-05	0.33776	0.534	0.388	0.422505	3	tmem176l.1
polr2l	3.60887e-05	0.235714	0.4	0.08	0.423826	4	polr2l
ptbp1a	3.63557e-05	0.200223	0.19	0.075	0.426961	3	ptbp1a
psmd13	3.63613e-05	0.238674	0.2	0.024	0.427027	4	psmd13
chchd6b	3.67676e-05	0.207464	0.6	0.146	0.431799	4	chchd6b
rbm14b	3.76963e-05	0.267023	0.333	0.064	0.442705	4	rbm14b
tent4b	3.7818e-05	0.193924	0.2	0.024	0.444135	4	tent4b
btg22	3.82503e-05	0.344259	0.905	0.898	0.449212	3	btg2
npc21	3.82571e-05	0.284115	0.333	0.059	0.449291	4	npc2
ap1ar	3.91618e-05	0.221433	0.333	0.063	0.459916	4	ap1ar
plpp1a1	3.94679e-05	0.248171	0.333	0.059	0.463511	4	plpp1a
fut8a	3.95958e-05	0.195019	0.267	0.042	0.465013	4	fut8a
selenos	4.02716e-05	0.140952	0.2	0.024	0.472949	4	selenos
phb2b	4.0728e-05	0.114839	0.138	0.044	0.47831	3	phb2b
nat8l	4.08112e-05	0.151725	0.207	0.083	0.479286	3	nat8l
dhrs13l11	4.09636e-05	0.232483	0.4	0.086	0.481077	4	dhrs13l1
mfge8b	4.09945e-05	0.500918	0.667	0.195	0.48144	4	mfge8b
h3f3b.1.1	4.11843e-05	0.358405	0.534	0.406	0.483669	3	h3f3b.1.1
hif1ab	4.15618e-05	0.164468	0.256	0.135	0.488101	1	hif1ab
hdlbpa	4.21555e-05	0.183443	0.147	0.049	0.495075	3	hdlbpa
tbca	4.27198e-05	0.297539	0.6	0.156	0.501701	4	tbca
bmp2k	4.30143e-05	0.268088	0.333	0.065	0.50516	4	bmp2k
zp3.2	4.3888e-05	0.524547	0.2	0.024	0.515421	4	zp3.2
mt-nd21	4.4228e-05	0.610469	1	0.549	0.519414	4	mt-nd2
atg13	4.43141e-05	0.105929	0.135	0.051	0.520424	1	atg13
nsa2	4.43302e-05	0.113536	0.989	0.95	0.520614	0	nsa2
psme2	4.45194e-05	0.173167	0.179	0.077	0.522836	1	psme2
rad17	4.46547e-05	0.241941	0.267	0.043	0.524425	4	rad17
ifi302	4.54022e-05	0.392326	0.467	0.113	0.533204	4	ifi30
rnf10	4.56871e-05	0.232606	0.6	0.15	0.536549	4	rnf10
st5	4.56882e-05	0.242824	0.4	0.088	0.536562	4	st5
ahcy	4.63483e-05	0.227085	0.821	0.808	0.544314	1	ahcy
chmp7	4.63825e-05	0.20382	0.2	0.025	0.544716	4	chmp7
cxxc5a	4.7545e-05	0.165044	0.267	0.129	0.558368	3	cxxc5a
mt-nd5	4.75496e-05	0.199585	0.372	0.228	0.558422	1	mt-nd5
pias4a	4.8512e-05	0.130058	0.2	0.024	0.569725	4	pias4a
txndc9	4.85805e-05	0.235058	0.533	0.127	0.570529	4	txndc9
tubb4b	4.89019e-05	0.327233	0.415	0.282	0.574304	1	tubb4b
antxr1c	4.90279e-05	0.232397	0.129	0.041	0.575783	3	antxr1c
si:dkey-28a3.2	4.96078e-05	0.156405	0.2	0.025	0.582594	4	si:dkey-28a3.2
bloc1s6	4.968e-05	0.103453	0.097	0.029	0.583441	1	bloc1s6
si:dkey-240n22.8	4.97099e-05	0.113812	0.133	0.011	0.583793	4	si:dkey-240n22.8
hsd17b8	4.97099e-05	0.113812	0.133	0.011	0.583793	4	hsd17b8
si:ch211-194e15.5	4.97099e-05	0.113812	0.133	0.011	0.583793	4	si:ch211-194e15.5
ppm1lb	4.97099e-05	0.113812	0.133	0.011	0.583793	4	ppm1lb
sacs	4.97099e-05	0.113812	0.133	0.011	0.583793	4	sacs
si:dkey-230i18.2	4.97099e-05	0.113812	0.133	0.011	0.583793	4	si:dkey-230i18.2
zgc:92606	5.02315e-05	0.190294	0.37	0.246	0.589918	0	zgc:92606
rbm281	5.0387e-05	0.292059	0.4	0.087	0.591745	4	rbm28
med30	5.07584e-05	0.159481	0.285	0.165	0.596107	1	med30
kctd12.2	5.08055e-05	0.112684	0.133	0.011	0.59666	4	kctd12.2
acp6	5.08055e-05	0.112684	0.133	0.011	0.59666	4	acp6
tsta3	5.08055e-05	0.112684	0.133	0.011	0.59666	4	tsta3
si:ch211-247j9.1	5.08055e-05	0.112684	0.133	0.011	0.59666	4	si:ch211-247j9.1
CR388143.1	5.08055e-05	0.111557	0.133	0.011	0.59666	4	CR388143.1
ndufa7	5.0819e-05	0.164222	0.133	0.011	0.596818	4	ndufa7
npm1b	5.08288e-05	0.216105	0.333	0.064	0.596934	4	npm1b
si:ch211-262i1.6	5.13743e-05	0.163101	0.133	0.011	0.60334	4	si:ch211-262i1.6
zgc:175088	5.18235e-05	0.20029	0.267	0.041	0.608616	4	zgc:175088
si:dkey-11n14.1	5.19228e-05	0.111557	0.133	0.011	0.609781	4	si:dkey-11n14.1
pld2	5.19228e-05	0.111557	0.133	0.011	0.609781	4	pld2
sacm1la	5.19228e-05	0.111557	0.133	0.011	0.609781	4	sacm1la
ezrb	5.19297e-05	0.163101	0.133	0.011	0.609862	4	ezrb
si:ch73-174h16.4	5.19348e-05	0.154182	0.2	0.025	0.609922	4	si:ch73-174h16.4
cmtm7	5.19348e-05	0.154182	0.2	0.025	0.609922	4	cmtm7
kctd5a	5.23242e-05	0.174023	0.233	0.103	0.614495	3	kctd5a
cbx8b	5.25767e-05	0.147854	0.193	0.094	0.61746	1	cbx8b
appa	5.27485e-05	0.141863	0.242	0.124	0.619478	1	appa
AL954696.1	5.30622e-05	0.161982	0.133	0.011	0.623162	4	AL954696.1
rfc5	5.30622e-05	0.110432	0.133	0.011	0.623162	4	rfc5
zgc:114046	5.30625e-05	0.109308	0.133	0.011	0.623166	4	zgc:114046
tmem35	5.31352e-05	0.151965	0.2	0.025	0.62402	4	tmem35
cul5a	5.42084e-05	0.192831	0.267	0.043	0.636624	4	cul5a
exosc2	5.4224e-05	0.109308	0.133	0.011	0.636807	4	exosc2
osr2	5.44637e-05	0.24536	0.897	0.834	0.639622	3	osr2
nfkbiab	5.45236e-05	0.360009	0.372	0.237	0.640326	1	nfkbiab
sec63	5.47713e-05	0.132515	0.069	0.013	0.643234	3	sec63
snrpc	5.48072e-05	0.214133	0.333	0.061	0.643655	4	snrpc
zgc:1037001	5.50446e-05	0.510983	0.267	0.042	0.646444	4	zgc:103700
gcfc2	5.54097e-05	0.107063	0.133	0.011	0.650732	4	gcfc2
pxna	5.60002e-05	0.158632	0.133	0.011	0.657666	4	pxna
si:dkeyp-46h3.2	5.60151e-05	0.248505	0.133	0.011	0.657841	4	si:dkeyp-46h3.2
atp6v1h	5.60562e-05	0.113434	0.213	0.105	0.658324	1	atp6v1h
si:ch211-218c6.8	5.66166e-05	0.107063	0.133	0.011	0.664906	4	si:ch211-218c6.8
tsr1	5.66191e-05	0.104823	0.133	0.011	0.664935	4	tsr1
grinab	5.71767e-05	0.297057	0.333	0.063	0.671483	4	grinab
cd99	5.73415e-05	0.193924	0.2	0.025	0.673418	4	cd99
med29	5.78482e-05	0.105943	0.133	0.011	0.67937	4	med29
ube2a	5.78504e-05	0.103706	0.133	0.011	0.679396	4	ube2a
cd151l	5.78527e-05	0.101473	0.133	0.011	0.679422	4	cd151l
lman2	5.80823e-05	0.1574	0.267	0.041	0.682118	4	lman2
cops2	5.83166e-05	0.191957	0.333	0.062	0.684871	4	cops2
micu2	5.86252e-05	0.157441	0.25	0.117	0.688494	3	micu2
rex1bd	5.90886e-05	0.209749	0.333	0.064	0.693936	4	rex1bd
nup62l	5.91039e-05	0.104823	0.133	0.011	0.694116	4	nup62l
asna1	5.91091e-05	0.101473	0.133	0.011	0.694178	4	asna1
rab13	5.95219e-05	0.146443	0.2	0.025	0.699025	4	rab13
mtx2	5.99917e-05	0.188469	0.2	0.025	0.704543	4	mtx2
ube2d1b	6.01051e-05	0.212922	0.267	0.042	0.705874	4	ube2d1b
akap13	6.03045e-05	0.127153	0.13	0.05	0.708216	1	akap13
mt-atp61	6.03344e-05	0.599036	1	0.815	0.708567	4	mt-atp6
cox11	6.07098e-05	0.216105	0.333	0.065	0.712976	4	cox11
RASSF5	6.0877e-05	0.107062	0.319	0.181	0.71494	1	RASSF5
zrsr2	6.12881e-05	0.239762	0.267	0.045	0.719767	4	zrsr2
ccbe11	6.22376e-05	0.211863	0.333	0.065	0.730918	4	ccbe1
si:dkeyp-44a8.2	6.23488e-05	0.151387	0.213	0.104	0.732224	1	si:dkeyp-44a8.2
hspa8	6.24274e-05	0.246549	0.715	0.604	0.733147	1	hspa8
mmp2	6.25574e-05	0.1959	0.384	0.255	0.734674	0	mmp2
setb	6.32876e-05	0.302175	0.25	0.12	0.743249	3	setb
igf2bp2b	6.34038e-05	0.118285	0.172	0.066	0.744615	3	igf2bp2b
rrbp1a	6.38821e-05	0.15319	0.267	0.041	0.750231	4	rrbp1a
hibadhb1	6.41057e-05	0.172278	0.267	0.042	0.752858	4	hibadhb
nfyc	6.42834e-05	0.115044	0.188	0.085	0.754944	1	nfyc
zgc:153215	6.46235e-05	0.187381	0.2	0.025	0.758938	4	zgc:153215
mych1	6.46589e-05	0.169072	0.2	0.025	0.759355	4	mych
ssr3	6.47532e-05	0.181754	0.517	0.351	0.760461	1	ssr3
si:ch211-288g17.3	6.6e-05	0.416587	0.216	0.097	0.775104	3	si:ch211-288g17.3
hikeshi	6.66001e-05	0.139857	0.2	0.025	0.782151	4	hikeshi
cxcl18b	6.77024e-05	0.443344	0.22	0.121	0.795097	0	cxcl18b
fzd7b	6.78932e-05	0.107908	0.384	0.251	0.797338	0	fzd7b
usp5	6.80774e-05	0.181961	0.2	0.025	0.799501	4	usp5
abcd3a	6.86534e-05	0.220365	0.333	0.066	0.806266	4	abcd3a
si:dkey-204f11.64	6.94281e-05	0.109733	0.208	0.104	0.815364	1	si:dkey-204f11.64
rbfox2	6.94435e-05	0.229401	0.4	0.089	0.815544	4	rbfox2
srsf6b	7.06402e-05	0.303213	0.4	0.087	0.829598	4	srsf6b
sept7a	7.07615e-05	0.125103	0.124	0.05	0.831023	0	sept7a
kansl1b	7.12576e-05	0.228376	0.4	0.089	0.836849	4	kansl1b
ppp1r14bb	7.15988e-05	0.207753	0.386	0.251	0.840856	1	ppp1r14bb
nfyba	7.20579e-05	0.257484	0.267	0.043	0.846248	4	nfyba
zgc:110626	7.4276e-05	0.120417	0.198	0.083	0.872298	3	zgc:110626
zgc:174268	7.48609e-05	0.188469	0.267	0.045	0.879166	4	zgc:174268
zgc:165582	7.48838e-05	0.156405	0.2	0.026	0.879436	4	zgc:165582
cpne3	7.48838e-05	0.156405	0.2	0.026	0.879436	4	cpne3
smarca2	7.51324e-05	0.216156	0.4	0.088	0.882355	4	smarca2
emp2	7.66185e-05	0.188469	0.267	0.045	0.899807	4	emp2
si:dkey-34m19.3	7.66185e-05	0.188469	0.267	0.045	0.899807	4	si:dkey-34m19.3
irgq1	7.66188e-05	0.186295	0.267	0.045	0.899811	4	irgq1
hephl1a	7.72489e-05	0.281062	0.4	0.094	0.907211	4	hephl1a
ube2d2	7.98846e-05	0.269956	0.467	0.11	0.938165	4	ube2d2
mpp7a	7.99953e-05	0.151965	0.2	0.026	0.939464	4	mpp7a
FO704779.1	8.17673e-05	0.151965	0.2	0.026	0.960275	4	FO704779.1
znf1035	8.17905e-05	0.248035	0.267	0.043	0.960547	4	znf1035
eif1b	8.21672e-05	0.137988	0.839	0.745	0.964972	0	eif1b
taok1b	8.2376e-05	0.283126	0.4	0.095	0.967424	4	taok1b
hnrnpaba	8.33121e-05	0.443245	0.302	0.175	0.978417	3	hnrnpaba
gadd45ba1	8.34648e-05	0.838899	0.8	0.339	0.980211	4	gadd45ba
enosf1	8.43745e-05	0.136129	0.275	0.156	0.990894	1	enosf1
atp5mc1	8.44235e-05	0.391714	0.216	0.103	0.99147	3	atp5mc1
jun	8.47133e-05	0.117213	1	0.939	0.994872	0	jun
pde4ba	8.81878e-05	0.166003	0.514	0.38	1	0	pde4ba
txnipa	9.29014e-05	0.203345	0.418	0.285	1	0	txnipa
si:ch73-335l21.4	0.000127803	0.199923	0.638	0.518	1	0	si:ch73-335l21.4
cx43	0.000133529	0.203978	0.633	0.533	1	0	cx43
net1	0.000149727	0.182215	0.169	0.086	1	0	net1
eif3s6ip	0.000153678	0.143614	0.619	0.49	1	0	eif3s6ip
flna	0.000158958	0.13913	0.192	0.102	1	0	flna
wnt11r	0.000182191	0.170042	0.616	0.488	1	0	wnt11r
rnf128a	0.000208662	0.130787	0.548	0.413	1	0	rnf128a
inka1a	0.000339718	0.126982	0.424	0.294	1	0	inka1a
cxcr4b	0.000391121	0.212233	0.054	0.013	1	0	cxcr4b
eif3ea	0.000434179	0.121512	0.864	0.793	1	0	eif3ea
klf6a	0.000548835	0.215115	0.537	0.426	1	0	klf6a
slc5a6b	0.000561319	0.105079	0.215	0.13	1	0	slc5a6b
gadd45ba	0.000864922	0.179373	0.41	0.305	1	0	gadd45ba
caprin1b	0.00087023	0.136292	0.333	0.235	1	0	caprin1b
srsf5a	0.000882897	0.122789	0.737	0.655	1	0	srsf5a
sox11b	0.00103611	0.172084	0.144	0.076	1	0	sox11b
junbb	0.00116937	0.116783	0.585	0.467	1	0	junbb
rpl6	0.00136973	0.104079	0.96	0.948	1	0	rpl6
her6	0.00140539	0.268281	0.266	0.179	1	0	her6
krt8	0.00197974	0.171148	0.59	0.512	1	0	krt8
ccn1	0.00216202	0.21667	0.141	0.078	1	0	ccn1
tsc22d3	0.00218594	0.11835	0.475	0.385	1	0	tsc22d3
si:dkey-159f12.2	0.00231471	0.11531	0.226	0.147	1	0	si:dkey-159f12.2
si:ch211-196l7.4	0.00233769	0.137206	0.726	0.633	1	0	si:ch211-196l7.4
klf11b	0.00260628	0.120272	0.299	0.207	1	0	klf11b
crip1	0.00271645	0.105489	0.11	0.056	1	0	crip1
zfp36l2	0.0027787	0.13177	0.107	0.054	1	0	zfp36l2
pfdn5	0.00404587	0.139452	0.26	0.184	1	0	pfdn5
cnn3a	0.00535782	0.142533	0.28	0.203	1	0	cnn3a
nt5dc2	0.00561309	0.103922	0.203	0.134	1	0	nt5dc2
jund	0.00689577	0.101898	0.571	0.464	1	0	jund
eif3c	0.00794903	0.102032	0.438	0.356	1	0	eif3c
prkar2aa	9.09818e-05	0.201435	0.7	0.624	1	1	prkar2aa
bhlhe41	9.41925e-05	0.104691	0.155	0.067	1	1	bhlhe41
nfkbiaa	9.42923e-05	0.252093	0.174	0.08	1	1	nfkbiaa
prdx5	0.000102272	0.174552	0.744	0.661	1	1	prdx5
snx17	0.000106064	0.120213	0.29	0.168	1	1	snx17
ndufb2	0.000108764	0.17667	0.246	0.135	1	1	ndufb2
errfi1a	0.000111656	0.123708	0.155	0.067	1	1	errfi1a
lifrb	0.000117072	0.200658	0.367	0.246	1	1	lifrb
adipor2	0.000118936	0.144331	0.242	0.129	1	1	adipor2
slc25a23a	0.000121576	0.111779	0.246	0.136	1	1	slc25a23a
myl12.2	0.000125065	0.12291	0.135	0.056	1	1	myl12.2
mt-nd3	0.000137565	0.179804	0.3	0.175	1	1	mt-nd3
chmp4ba	0.000139719	0.105538	0.15	0.064	1	1	chmp4ba
irf9	0.000145391	0.101828	0.193	0.095	1	1	irf9
gata6	0.000145855	0.151196	0.213	0.11	1	1	gata6
h3f3a	0.000146012	0.182081	0.198	0.096	1	1	h3f3a
hsf2	0.000153882	0.115394	0.111	0.041	1	1	hsf2
acadl	0.000155696	0.108415	0.14	0.058	1	1	acadl
zgc:123105	0.000161852	0.122502	0.13	0.053	1	1	zgc:123105
cdkn1bb	0.00016958	0.203462	0.295	0.18	1	1	cdkn1bb
atp5fa1	0.000181629	0.248738	0.507	0.392	1	1	atp5fa1
sorcs2	0.00018822	0.101768	0.217	0.115	1	1	sorcs2
islr2	0.000195375	0.132531	0.246	0.136	1	1	islr2
zgc:100918	0.000200229	0.104379	0.15	0.066	1	1	zgc:100918
si:ch211-132p1.3	0.000224335	0.295648	0.13	0.056	1	1	si:ch211-132p1.3
nme2a	0.00024152	0.22144	0.676	0.601	1	1	nme2a
tsc22d1	0.0002465	0.192119	0.29	0.173	1	1	tsc22d1
chmp1b	0.000253695	0.101974	0.121	0.048	1	1	chmp1b
ndufb9	0.000284483	0.160771	0.3	0.181	1	1	ndufb9
cltca	0.000284978	0.148228	0.188	0.095	1	1	cltca
ulk2	0.000296209	0.120551	0.261	0.151	1	1	ulk2
selenok	0.000305577	0.141539	0.232	0.127	1	1	selenok
sf3b1	0.000323248	0.138895	0.217	0.117	1	1	sf3b1
pabpc1b	0.000336425	0.129314	0.971	0.953	1	1	pabpc1b
mpv17	0.000350374	0.190778	0.319	0.205	1	1	mpv17
si:ch73-281n10.2	0.000362866	0.1435	0.406	0.27	1	1	si:ch73-281n10.2
irf2bp2b1	0.000369587	0.21898	0.454	0.333	1	1	irf2bp2b
hnrnpm	0.000385442	0.108748	0.101	0.038	1	1	hnrnpm
btg21	0.000387626	0.153118	0.957	0.882	1	1	btg2
csnk2b	0.000398406	0.15749	0.329	0.206	1	1	csnk2b
nr2f2	0.00041232	0.163384	0.314	0.196	1	1	nr2f2
zgc:194659	0.000431226	0.142006	0.184	0.095	1	1	zgc:194659
anks1b	0.000472504	0.117882	0.386	0.262	1	1	anks1b
rps27l	0.000472653	0.216346	0.527	0.414	1	1	rps27l
abhd15a	0.00051004	0.12469	0.145	0.067	1	1	abhd15a
qkia	0.000530628	0.171216	0.256	0.154	1	1	qkia
ivd	0.000546382	0.103953	0.179	0.089	1	1	ivd
sdhb	0.000550051	0.121628	0.164	0.08	1	1	sdhb
mgst1.1	0.000571818	0.105538	0.227	0.13	1	1	mgst1.1
ndrg4	0.000572202	0.128376	0.14	0.066	1	1	ndrg4
gadd45ab	0.000581629	0.167342	0.227	0.127	1	1	gadd45ab
napepld	0.000622798	0.124902	0.251	0.154	1	1	napepld
greb1l	0.000645115	0.109143	0.242	0.143	1	1	greb1l
micos10	0.000713738	0.131047	0.135	0.063	1	1	micos10
tiparp	0.000746457	0.124798	0.213	0.118	1	1	tiparp
DDX17	0.000748661	0.159437	0.29	0.18	1	1	DDX17
ppt1	0.000765347	0.154392	0.198	0.108	1	1	ppt1
fdx1	0.000770675	0.112627	0.111	0.047	1	1	fdx1
dio1	0.000794864	0.173588	0.329	0.227	1	1	dio1
prkar1aa	0.00083012	0.102912	0.203	0.113	1	1	prkar1aa
eno1a	0.000888717	0.124798	0.285	0.173	1	1	eno1a
cx431	0.000896715	0.267951	0.628	0.556	1	1	cx43
chtopa	0.000902301	0.173029	0.304	0.193	1	1	chtopa
mbnl2	0.000949916	0.112326	0.396	0.272	1	1	mbnl2
ca8	0.000994976	0.148273	0.309	0.209	1	1	ca8
klf11b1	0.00105397	0.150403	0.333	0.216	1	1	klf11b
nr2f1a	0.00111256	0.146568	0.797	0.753	1	1	nr2f1a
grtp1a	0.00116853	0.105148	0.266	0.167	1	1	grtp1a
zgc:103700	0.00117529	0.224038	0.087	0.034	1	1	zgc:103700
ptp4a2b	0.00127925	0.189717	0.184	0.104	1	1	ptp4a2b
hspb1	0.00138136	0.420898	0.188	0.107	1	1	hspb1
cox7c	0.00138438	0.133381	0.28	0.173	1	1	cox7c
ccni	0.00139354	0.125344	0.85	0.822	1	1	ccni
mt-nd1	0.00140683	0.254918	0.493	0.408	1	1	mt-nd1
slc25a47a	0.00143344	0.111442	0.237	0.142	1	1	slc25a47a
tpm1	0.00146009	0.191566	0.444	0.335	1	1	tpm1
tnrc6a	0.00148635	0.115895	0.135	0.066	1	1	tnrc6a
dbpb	0.00151745	0.156553	0.261	0.168	1	1	dbpb
atp5po	0.00157896	0.144093	0.473	0.348	1	1	atp5po
bckdhb	0.00167741	0.104034	0.169	0.091	1	1	bckdhb
ndufb7	0.00168773	0.149871	0.256	0.161	1	1	ndufb7
hadhb	0.00169604	0.111552	0.159	0.083	1	1	hadhb
npc2	0.00170593	0.114599	0.111	0.05	1	1	npc2
wbp2nl	0.00173256	0.162738	0.193	0.113	1	1	wbp2nl
myl12.1	0.0017424	0.15659	0.319	0.211	1	1	myl12.1
mphosph8	0.0018504	0.194745	0.531	0.444	1	1	mphosph8
mbpb	0.00193034	0.105408	0.357	0.246	1	1	mbpb
rab1ab	0.00194828	0.122602	0.126	0.061	1	1	rab1ab
ndufs2	0.00197227	0.101541	0.174	0.094	1	1	ndufs2
sesn1	0.00198097	0.166754	0.184	0.102	1	1	sesn1
chchd10	0.00198813	0.105783	0.121	0.057	1	1	chchd10
cd74b	0.00199664	0.283632	0.174	0.096	1	1	cd74b
sdhc	0.00207772	0.105274	0.174	0.095	1	1	sdhc
hnrnpub	0.00208696	0.136999	0.164	0.091	1	1	hnrnpub
atp5pb	0.0021685	0.193062	0.411	0.298	1	1	atp5pb
tp53inp1	0.00217973	0.145945	0.188	0.108	1	1	tp53inp1
blcap	0.00221698	0.145588	0.203	0.121	1	1	blcap
ptmaa	0.00238229	0.105929	0.227	0.135	1	1	ptmaa
zgc:162944	0.00238696	0.147821	0.319	0.213	1	1	zgc:162944
ifi30	0.00242513	0.214801	0.179	0.101	1	1	ifi30
fez1	0.00245757	0.105242	0.232	0.145	1	1	fez1
atp5mc3b	0.0024831	0.104848	0.908	0.937	1	1	atp5mc3b
asph	0.00260509	0.165806	0.464	0.365	1	1	asph
rab2a	0.00264654	0.10577	0.217	0.13	1	1	rab2a
atf4a	0.00267184	0.211493	0.493	0.39	1	1	atf4a
acat1	0.00278502	0.125783	0.198	0.117	1	1	acat1
junbb1	0.0028706	0.173846	0.58	0.494	1	1	junbb
gabarapl2	0.00304872	0.127955	0.179	0.104	1	1	gabarapl2
ndfip2	0.00318799	0.139877	0.333	0.243	1	1	ndfip2
ncor1	0.0031993	0.104379	0.13	0.066	1	1	ncor1
serinc2	0.00322499	0.143053	0.29	0.197	1	1	serinc2
rnf19a	0.00337066	0.153594	0.208	0.127	1	1	rnf19a
edf1	0.0033785	0.173272	0.517	0.44	1	1	edf1
mccc1	0.0036706	0.101633	0.203	0.124	1	1	mccc1
aifm1	0.00386396	0.165162	0.217	0.136	1	1	aifm1
gadd45ga	0.00408664	0.29402	0.135	0.072	1	1	gadd45ga
mbnl3	0.00426771	0.112148	0.217	0.133	1	1	mbnl3
ddx5	0.00459094	0.13756	0.256	0.165	1	1	ddx5
ppm1k	0.00460533	0.10736	0.271	0.186	1	1	ppm1k
sumo3a	0.00482021	0.144206	0.203	0.123	1	1	sumo3a
rbms2a	0.00485404	0.132994	0.319	0.234	1	1	rbms2a
si:busm1-266f07.2	0.00490682	0.153353	0.077	0.032	1	1	si:busm1-266f07.2
lgals3b	0.00525776	0.102912	0.145	0.079	1	1	lgals3b
hipk3b	0.00589265	0.110149	0.237	0.159	1	1	hipk3b
cdh2	0.00590121	0.105211	0.348	0.247	1	1	cdh2
cnn3a1	0.00595392	0.119683	0.309	0.211	1	1	cnn3a
pin1	0.00630833	0.109967	0.295	0.199	1	1	pin1
srrm2	0.00668334	0.104379	0.116	0.06	1	1	srrm2
bzw1b	0.00692231	0.168379	0.164	0.095	1	1	bzw1b
gbp	0.00713529	0.172493	0.391	0.297	1	1	gbp
nfil3-6	0.00778148	0.135947	0.155	0.092	1	1	nfil3-6
decr1	0.00791926	0.119845	0.256	0.177	1	1	decr1
wu:fj16a03	0.00796645	0.266029	0.111	0.058	1	1	wu:fj16a03
relb	0.00802863	0.105783	0.164	0.099	1	1	relb
mafba	0.00818331	0.213731	0.227	0.151	1	1	mafba
tra2a	0.00822843	0.100408	0.145	0.083	1	1	tra2a
oaz1b	0.00843985	0.163461	0.628	0.563	1	1	oaz1b
BX936337.1	0.00858817	0.101596	0.159	0.094	1	1	BX936337.1
CT027638.1	0.000175824	0.527816	0.196	0.105	1	2	CT027638.1
ybx1	0.000176428	0.101895	1	0.993	1	2	ybx1
rplp2	0.000298894	0.101046	1	0.999	1	2	rplp2
eif3ha1	0.00116565	0.197266	0.804	0.682	1	2	eif3ha
si:ch73-160p18.3	0.00128057	0.40711	0.085	0.033	1	2	si:ch73-160p18.3
ppiaa	0.00140858	0.133594	0.97	0.921	1	2	ppiaa
eif3ea1	0.00242692	0.145987	0.879	0.805	1	2	eif3ea
nsa21	0.00319727	0.120335	0.97	0.964	1	2	nsa2
rps171	0.00409558	0.105359	0.99	0.965	1	2	rps17
ola1	0.00539333	0.192333	0.814	0.721	1	2	ola1
pnisr	0.00609002	0.132284	0.126	0.068	1	2	pnisr
rpl29	0.00904169	0.166121	0.95	0.939	1	2	rpl29
cyp11a1	0.00951212	0.374738	0.412	0.353	1	2	cyp11a1
eif3m	0.00972477	0.117742	0.905	0.866	1	2	eif3m
her61	8.61493e-05	0.73028	0.336	0.195	1	3	her6
rpl291	8.89478e-05	0.174955	0.983	0.935	1	3	rpl29
zswim5	9.34808e-05	0.144123	0.259	0.125	1	3	zswim5
krtcap2	9.76019e-05	0.211785	0.207	0.09	1	3	krtcap2
pdzrn3b	0.000100526	0.140929	0.155	0.058	1	3	pdzrn3b
uqcrb	0.000102652	0.305926	0.319	0.183	1	3	uqcrb
nop2	0.000105134	0.137854	0.147	0.052	1	3	nop2
grhl1	0.00010617	0.123224	0.147	0.053	1	3	grhl1
mcl1b	0.000106691	0.282214	0.19	0.081	1	3	mcl1b
cplx2l	0.000109044	0.152738	0.172	0.068	1	3	cplx2l
im:7152348	0.000126019	0.1975	0.138	0.048	1	3	im:7152348
vat1	0.000127641	0.181102	0.103	0.03	1	3	vat1
leng1	0.000135317	0.112186	0.19	0.079	1	3	leng1
BX569787.1	0.000136039	0.144418	0.069	0.014	1	3	BX569787.1
hnrnpl2	0.000141657	0.185414	0.112	0.035	1	3	hnrnpl2
mmp14b	0.000142858	0.191839	0.302	0.165	1	3	mmp14b
rbm28	0.000157901	0.118839	0.19	0.077	1	3	rbm28
nucks1a	0.000169892	0.324603	0.241	0.123	1	3	nucks1a
efcc1	0.000176754	0.166191	0.233	0.114	1	3	efcc1
ctnnb1	0.000181206	0.238022	0.198	0.09	1	3	ctnnb1
asah1b	0.000188941	0.150949	0.19	0.083	1	3	asah1b
med28	0.000189517	0.15613	0.103	0.031	1	3	med28
si:dkey-183j2.10	0.00019464	0.105047	0.121	0.04	1	3	si:dkey-183j2.10
cx47.1	0.000219716	0.136087	0.121	0.04	1	3	cx47.1
nudc	0.000225731	0.134246	0.095	0.027	1	3	nudc
eif1axb	0.000231756	0.233554	0.241	0.117	1	3	eif1axb
si:ch73-1a9.3	0.000238842	0.509623	0.69	0.695	1	3	si:ch73-1a9.3
etf1b	0.000243617	0.268593	0.181	0.081	1	3	etf1b
znf330	0.000245652	0.114893	0.112	0.036	1	3	znf330
epas1b	0.000257217	0.220905	0.44	0.294	1	3	epas1b
2020-09-10	0.000261686	0.139418	0.078	0.019	1	3	2020-09-10
STMP1	0.000262787	0.241568	0.216	0.103	1	3	STMP1
hibadhb	0.000264525	0.106289	0.112	0.036	1	3	hibadhb
cmtm3	0.000276667	0.114839	0.138	0.052	1	3	cmtm3
gna12a	0.000280509	0.178741	0.233	0.116	1	3	gna12a
dclk1a	0.000282492	0.234876	0.276	0.152	1	3	dclk1a
cox15	0.000298497	0.102551	0.086	0.023	1	3	cox15
slc38a5b	0.000300476	0.207177	0.276	0.143	1	3	slc38a5b
stard13b	0.000332333	0.200814	0.31	0.181	1	3	stard13b
ubc	0.000337543	0.409115	0.578	0.489	1	3	ubc
smim15	0.000354123	0.133016	0.095	0.028	1	3	smim15
sirt5	0.00036034	0.141646	0.216	0.105	1	3	sirt5
si:ch211-51e12.7	0.00036391	0.174128	0.121	0.043	1	3	si:ch211-51e12.7
si:ch73-46j18.5	0.000367775	0.27715	0.371	0.232	1	3	si:ch73-46j18.5
acaa2	0.000375329	0.13818	0.19	0.085	1	3	acaa2
cox5ab	0.000401109	0.239716	0.224	0.115	1	3	cox5ab
znf385b	0.000418396	0.106298	0.147	0.058	1	3	znf385b
calm1a	0.000418695	0.267318	0.276	0.152	1	3	calm1a
rbx1	0.000429729	0.244471	0.207	0.101	1	3	rbx1
tomm20b	0.000456016	0.272395	0.336	0.204	1	3	tomm20b
map1lc3b	0.000469576	0.143472	0.181	0.08	1	3	map1lc3b
rps19bp1	0.000475283	0.117293	0.086	0.025	1	3	rps19bp1
snrpf	0.000480318	0.26774	0.233	0.123	1	3	snrpf
snrpd2	0.00049544	0.215121	0.164	0.071	1	3	snrpd2
myef2	0.000515185	0.113705	0.078	0.021	1	3	myef2
creg2	0.000537267	0.185422	0.302	0.181	1	3	creg2
si:dkeyp-113d7.1	0.000561017	0.161858	0.276	0.151	1	3	si:dkeyp-113d7.1
rerea	0.000565107	0.10874	0.129	0.049	1	3	rerea
bmp2b	0.000580725	0.102513	0.095	0.03	1	3	bmp2b
b2m1	0.000592382	0.170785	0.94	0.902	1	3	b2m
ndufab1a	0.000608208	0.168007	0.181	0.083	1	3	ndufab1a
pik3c2a	0.000610915	0.119237	0.181	0.083	1	3	pik3c2a
zbtb20	0.000649624	0.173685	0.302	0.169	1	3	zbtb20
akap12b	0.000679088	0.237131	0.164	0.074	1	3	akap12b
psma3	0.000724526	0.262551	0.233	0.126	1	3	psma3
dynll1	0.000735824	0.234929	0.086	0.026	1	3	dynll1
cbx4	0.000761947	0.15034	0.276	0.154	1	3	cbx4
nsfl1c	0.000764266	0.102437	0.052	0.01	1	3	nsfl1c
wu:fi42e03	0.000774404	0.169239	0.052	0.01	1	3	wu:fi42e03
mxi1	0.000784107	0.163541	0.216	0.11	1	3	mxi1
klf11a	0.000796233	0.107513	0.207	0.099	1	3	klf11a
hint1	0.000851012	0.261275	0.319	0.199	1	3	hint1
tomm6	0.000852216	0.177411	0.164	0.074	1	3	tomm6
npm3	0.000904682	0.159047	0.112	0.041	1	3	npm3
egr2a1	0.000911331	0.635531	0.362	0.262	1	3	egr2a
s100a10b	0.000915804	0.216584	0.06	0.014	1	3	s100a10b
igfbp1a1	0.000934512	0.597298	0.621	0.517	1	3	igfbp1a
psmd7	0.000935676	0.116003	0.095	0.031	1	3	psmd7
eif4a1a	0.000975926	0.23336	0.164	0.075	1	3	eif4a1a
sh3bgrl	0.00105401	0.100396	0.181	0.085	1	3	sh3bgrl
crtap	0.00110039	0.116625	0.224	0.116	1	3	crtap
cbx5	0.00111081	0.174524	0.181	0.086	1	3	cbx5
srsf3b	0.00116175	0.21678	0.267	0.151	1	3	srsf3b
dkc1	0.00117586	0.17359	0.172	0.081	1	3	dkc1
c1qbp	0.00121121	0.252695	0.224	0.123	1	3	c1qbp
cnot3b	0.00129784	0.119237	0.181	0.088	1	3	cnot3b
ppa1b	0.00130688	0.111224	0.078	0.023	1	3	ppa1b
eif5b	0.00131992	0.200604	0.164	0.076	1	3	eif5b
denr	0.0014052	0.195648	0.164	0.077	1	3	denr
elovl1b	0.00141069	0.148575	0.112	0.043	1	3	elovl1b
hnrnpabb	0.00147156	0.335772	0.198	0.102	1	3	hnrnpabb
tomm20a	0.00152796	0.23641	0.103	0.039	1	3	tomm20a
phc2a	0.00157632	0.154494	0.052	0.012	1	3	phc2a
rcc2	0.00160111	0.139949	0.086	0.028	1	3	rcc2
chd6	0.00162373	0.124981	0.25	0.138	1	3	chd6
sat1a.2	0.00164362	0.497474	0.328	0.208	1	3	sat1a.2
zgc:171750	0.00171813	0.134443	0.052	0.012	1	3	zgc:171750
rab5if	0.00172458	0.116003	0.086	0.028	1	3	rab5if
tspan9b	0.00175713	0.100396	0.172	0.083	1	3	tspan9b
tcta	0.00179294	0.107513	0.147	0.066	1	3	tcta
neo1a	0.00181893	0.134458	0.293	0.177	1	3	neo1a
ptk7a	0.00191813	0.118133	0.172	0.084	1	3	ptk7a
bmp4	0.00193616	0.11784	0.198	0.102	1	3	bmp4
ext2	0.00207695	0.133577	0.207	0.111	1	3	ext2
lims1	0.00213384	0.10634	0.164	0.077	1	3	lims1
pde7a	0.00215378	0.107513	0.181	0.088	1	3	pde7a
psma5	0.00217309	0.180332	0.155	0.074	1	3	psma5
atp5f1b	0.002417	0.332805	0.517	0.423	1	3	atp5f1b
glud1a	0.00245459	0.118442	0.095	0.035	1	3	glud1a
clta	0.00249487	0.155304	0.129	0.057	1	3	clta
uggt1	0.00250041	0.109914	0.147	0.068	1	3	uggt1
si:ch211-199g17.2	0.00263133	0.2341	0.138	0.065	1	3	si:ch211-199g17.2
fkbp14	0.00265792	0.120238	0.19	0.099	1	3	fkbp14
cope	0.00267367	0.120508	0.112	0.045	1	3	cope
ppib	0.00277065	0.236525	0.638	0.586	1	3	ppib
hmgb1b	0.00288814	0.345243	0.405	0.307	1	3	hmgb1b
mapk12a	0.00306296	0.127992	0.198	0.107	1	3	mapk12a
sec61b	0.00315456	0.183351	0.198	0.105	1	3	sec61b
mtus1b	0.00315668	0.122459	0.431	0.302	1	3	mtus1b
spcs1	0.00317445	0.166134	0.181	0.094	1	3	spcs1
pdia6	0.0032251	0.202179	0.103	0.041	1	3	pdia6
fgfrl1a	0.00328776	0.182892	0.422	0.312	1	3	fgfrl1a
spry2	0.00338479	0.118687	0.052	0.013	1	3	spry2
srcap	0.0034992	0.105152	0.164	0.081	1	3	srcap
mydgf	0.00383293	0.111016	0.172	0.089	1	3	mydgf
atrx	0.00391166	0.244787	0.284	0.183	1	3	atrx
vcp	0.00409818	0.154853	0.147	0.07	1	3	vcp
phf14	0.00440218	0.102958	0.216	0.121	1	3	phf14
hnrnpa0a	0.00442054	0.150926	0.147	0.071	1	3	hnrnpa0a
sinhcaf	0.00442592	0.105323	0.25	0.147	1	3	sinhcaf
tmed2	0.00447345	0.207597	0.216	0.125	1	3	tmed2
mid1ip1l	0.00473957	0.190263	0.06	0.018	1	3	mid1ip1l
si:ch73-380l3.4	0.00475074	0.103998	0.172	0.089	1	3	si:ch73-380l3.4
snu13b	0.00481854	0.137854	0.078	0.027	1	3	snu13b
rbm8a	0.0049561	0.224974	0.276	0.179	1	3	rbm8a
ddx39aa	0.0051803	0.127526	0.103	0.043	1	3	ddx39aa
znf703	0.00529306	0.10988	0.155	0.079	1	3	znf703
clu	0.00536631	0.112577	0.052	0.014	1	3	clu
rwdd1	0.00543939	0.131284	0.138	0.066	1	3	rwdd1
mcm2	0.0056006	0.103761	0.052	0.014	1	3	mcm2
cdh21	0.00563272	0.18005	0.379	0.254	1	3	cdh2
cmpk	0.00567472	0.141866	0.147	0.072	1	3	cmpk
sumo2b	0.0057018	0.240361	0.302	0.2	1	3	sumo2b
polr2k	0.0058556	0.138728	0.086	0.034	1	3	polr2k
alas1	0.00585986	0.303546	0.276	0.177	1	3	alas1
eif2s1a	0.0059043	0.102551	0.069	0.023	1	3	eif2s1a
atf7ip	0.00596204	0.107513	0.147	0.071	1	3	atf7ip
serf2	0.0059977	0.229654	0.578	0.51	1	3	serf2
elof1	0.00608112	0.126712	0.138	0.066	1	3	elof1
csnk1a1	0.00613552	0.23511	0.345	0.244	1	3	csnk1a1
rbmx	0.00637474	0.160506	0.138	0.068	1	3	rbmx
ccnl1a	0.00647858	0.134686	0.121	0.055	1	3	ccnl1a
abcf1	0.00654129	0.118363	0.086	0.034	1	3	abcf1
zgc:91910	0.00657266	0.179401	0.216	0.128	1	3	zgc:91910
laptm4b	0.00659596	0.109831	0.181	0.099	1	3	laptm4b
fubp1	0.00667787	0.163898	0.121	0.057	1	3	fubp1
TXN	0.00687051	0.222995	0.578	0.538	1	3	TXN
mgst3b	0.00691552	0.204292	0.569	0.517	1	3	mgst3b
TST	0.00694044	0.108671	0.164	0.086	1	3	TST
ost4	0.00697201	0.12842	0.112	0.05	1	3	ost4
psmb7	0.00705328	0.167945	0.172	0.094	1	3	psmb7
dbi	0.00742399	0.115648	0.112	0.05	1	3	dbi
ppp2r2d	0.00759647	0.110992	0.172	0.093	1	3	ppp2r2d
ndufc2	0.00762387	0.198773	0.267	0.177	1	3	ndufc2
cct3	0.00766885	0.219631	0.336	0.235	1	3	cct3
dhrs13l1	0.007792	0.108688	0.155	0.081	1	3	dhrs13l1
ms4a17a.8	0.00785251	0.130503	0.216	0.129	1	3	ms4a17a.8
hmga1a	0.00793795	0.2618	0.198	0.115	1	3	hmga1a
tomm7	0.008047	0.158363	0.164	0.088	1	3	tomm7
vbp1	0.00807386	0.13904	0.095	0.04	1	3	vbp1
ccdc25	0.00809437	0.14076	0.241	0.15	1	3	ccdc25
phf20b	0.00822171	0.148756	0.293	0.201	1	3	phf20b
[truncated: 967 more rows]

## Sheet: Sub-cluster 0
	p_val	avg_logFC	pct.1	pct.2	p_val_adj	cluster	gene
rpl19	3.00129e-30	0.177707	1	1	3.52471e-26	0	rpl19
mycb	7.47592e-27	0.682603	0.814	0.654	8.77971e-23	0	mycb
glula	1.95561e-26	0.580102	0.537	0.201	2.29667e-22	0	glula
hsp90ab1	4.8553e-22	0.207309	1	1	5.70207e-18	0	hsp90ab1
rplp0	9.53442e-22	0.169452	1	1	1.11972e-17	0	rplp0
rps2	1.62222e-21	0.144924	1	1	1.90514e-17	0	rps2
rpl10a	7.13552e-21	0.136328	1	1	8.37996e-17	0	rpl10a
rps3a	3.96954e-20	0.135403	1	1	4.66183e-16	0	rps3a
timp2a	5.02088e-19	0.447177	0.653	0.369	5.89652e-15	0	timp2a
rps5	1.11281e-18	0.125289	1	1	1.30688e-14	0	rps5
rpl8	1.31985e-18	0.136911	1	1	1.55004e-14	0	rpl8
eef1g	2.4211e-18	0.176867	1	1	2.84334e-14	0	eef1g
rps7	3.54474e-18	0.132351	1	1	4.16294e-14	0	rps7
jdp2b	7.26536e-18	0.485074	0.853	0.706	8.53243e-14	0	jdp2b
faua	1.13335e-17	0.129631	1	1	1.33101e-13	0	faua
rpl7a	6.4383e-17	0.120862	1	1	7.56114e-13	0	rpl7a
btg2	8.59471e-17	0.328401	0.975	0.849	1.00936e-12	0	btg2
rpl23	1.01252e-16	0.110004	1	1	1.18911e-12	0	rpl23
btf3	4.77626e-16	0.179134	1	0.996	5.60924e-12	0	btf3
rpl24	1.16545e-15	0.108972	1	1	1.36871e-11	0	rpl24
igfbp1a	1.72756e-15	0.408632	0.689	0.426	2.02885e-11	0	igfbp1a
rps4x	2.22033e-15	0.127243	1	1	2.60756e-11	0	rps4x
rpl22l1	2.25928e-15	0.249898	0.989	0.95	2.6533e-11	0	rpl22l1
pnrc2	4.88918e-15	0.312262	0.977	0.922	5.74186e-11	0	pnrc2
fgg	6.57255e-15	0.359184	0.893	0.767	7.7188e-11	0	fgg
rpl21	9.48783e-15	0.103825	1	1	1.11425e-10	0	rpl21
junba	1.25056e-14	0.254139	0.952	0.81	1.46866e-10	0	junba
rps12	1.7724e-14	0.114174	1	1	2.0815e-10	0	rps12
rpl18	6.27921e-14	0.105367	1	1	7.37431e-10	0	rpl18
ptgdsa	1.05078e-13	0.175383	0.246	0.069	1.23404e-09	0	ptgdsa
mibp2	1.42468e-13	0.240632	0.949	0.927	1.67314e-09	0	mibp2
rpl5a	3.09706e-13	0.174466	1	0.993	3.63718e-09	0	rpl5a
lpl	8.72418e-13	0.310855	0.387	0.181	1.02457e-08	0	lpl
rpl3	1.33289e-12	0.118606	1	0.998	1.56535e-08	0	rpl3
rpl18a	1.79541e-12	0.108303	1	1	2.10852e-08	0	rpl18a
igfbp5b	2.08756e-12	0.419642	0.271	0.095	2.45163e-08	0	igfbp5b
ier2b	2.80542e-12	0.341159	0.862	0.734	3.29468e-08	0	ier2b
ier5	4.35798e-12	0.331261	0.743	0.533	5.11801e-08	0	ier5
rps17	4.55089e-12	0.205911	0.975	0.968	5.34456e-08	0	rps17
cd82a	1.17354e-11	0.189056	0.342	0.143	1.37821e-07	0	cd82a
socs3a	2.29867e-11	0.502144	0.681	0.525	2.69955e-07	0	socs3a
rpl15	3.36308e-11	0.106043	1	1	3.94961e-07	0	rpl15
ptbp3	3.84468e-11	0.222121	0.404	0.205	4.51519e-07	0	ptbp3
tpt1	4.65263e-11	0.130927	1	1	5.46405e-07	0	tpt1
slc25a5	4.8823e-11	0.113916	1	1	5.73377e-07	0	slc25a5
rps8a	6.42488e-11	0.101693	1	1	7.54538e-07	0	rps8a
nupr1b	7.57218e-11	0.3918	0.876	0.844	8.89277e-07	0	nupr1b
cpn1.1	1.62546e-10	0.287363	0.407	0.209	1.90894e-06	0	cpn1.1
rps6	4.89176e-10	0.113175	1	1	5.74489e-06	0	rps6
ier2a	1.28528e-09	0.309764	0.669	0.495	1.50944e-05	0	ier2a
rsl24d1	1.418e-09	0.137156	1	0.998	1.6653e-05	0	rsl24d1
fosab	1.70631e-09	0.211606	0.997	0.929	2.00389e-05	0	fosab
hsd3b1	2.61414e-09	0.205289	0.924	0.816	3.07005e-05	0	hsd3b1
otofa	5.27494e-09	0.153446	0.353	0.171	6.19489e-05	0	otofa
rps26l	6.54643e-09	0.10718	1	1	7.68813e-05	0	rps26l
rasd1	7.6233e-09	0.414179	0.607	0.439	8.95281e-05	0	rasd1
inhbab	7.73128e-09	0.14689	0.305	0.14	9.07962e-05	0	inhbab
pik3r3b	1.43638e-08	0.234104	0.782	0.609	0.000168688	0	pik3r3b
rpl5b	1.45246e-08	0.128867	0.997	0.993	0.000170577	0	rpl5b
mid1ip1b	3.22914e-08	0.212497	0.353	0.19	0.000379231	0	mid1ip1b
id2a	3.31947e-08	0.356939	0.59	0.443	0.000389838	0	id2a
gtpbp4	4.17571e-08	0.17581	0.921	0.844	0.000490396	0	gtpbp4
ecm1b	7.80436e-08	0.339256	0.571	0.404	0.000916544	0	ecm1b
stx2a	8.99958e-08	0.144962	0.291	0.142	0.00105691	0	stx2a
pcdh20.1	1.05012e-07	0.164144	0.373	0.209	0.00123326	0	pcdh20.1
si:ch211-136a13.1	1.36066e-07	0.153952	0.452	0.276	0.00159795	0	si:ch211-136a13.1
dusp2	2.32574e-07	0.345092	0.421	0.263	0.00273135	0	dusp2
actb1	2.82893e-07	0.26985	0.695	0.566	0.00332229	0	actb1
emp3b	3.30387e-07	0.141714	0.161	0.058	0.00388007	0	emp3b
eef1db	6.79716e-07	0.162616	0.921	0.845	0.00798259	0	eef1db
mknk2a	8.03382e-07	0.210531	0.203	0.091	0.00943492	0	mknk2a
egr2a	8.47349e-07	0.206618	0.37	0.212	0.00995126	0	egr2a
eif3ba	9.94427e-07	0.179174	0.743	0.629	0.0116786	0	eif3ba
atf4b	1.18193e-06	0.221215	0.701	0.555	0.0138805	0	atf4b
fosl1a	1.24027e-06	0.212361	0.381	0.223	0.0145657	0	fosl1a
her9	1.28e-06	0.409244	0.153	0.056	0.0150324	0	her9
chac1	1.84944e-06	0.358974	0.308	0.177	0.0217199	0	chac1
ctsla	1.93879e-06	0.391069	0.418	0.287	0.0227691	0	ctsla
irf2bp2b	2.47345e-06	0.186685	0.458	0.298	0.0290482	0	irf2bp2b
rpl4	3.32803e-06	0.123791	0.986	0.966	0.0390844	0	rpl4
eef2b	4.29601e-06	0.111563	0.997	0.993	0.0504524	0	eef2b
eif4a1b	5.15293e-06	0.146701	0.904	0.801	0.0605161	0	eif4a1b
rgs16	9.96694e-06	0.230952	0.234	0.127	0.117052	0	rgs16
cct6a	1.26708e-05	0.162269	0.65	0.52	0.148806	0	cct6a
asb11	1.30925e-05	0.162713	0.254	0.142	0.153759	0	asb11
cyp1b1	1.41256e-05	0.108553	0.308	0.173	0.165891	0	cyp1b1
ddx21	1.49169e-05	0.161963	0.701	0.585	0.175184	0	ddx21
eif3ha	1.50724e-05	0.137353	0.78	0.663	0.17701	0	eif3ha
fosb	1.5134e-05	0.108701	0.929	0.775	0.177733	0	fosb
pdia3	1.79476e-05	0.184012	0.638	0.536	0.210776	0	pdia3
sh3gl3a	1.81388e-05	0.109416	0.192	0.093	0.213022	0	sh3gl3a
arl4d	1.90527e-05	0.210578	0.559	0.425	0.223755	0	arl4d
inhbaa	2.20299e-05	0.283599	0.181	0.088	0.258719	0	inhbaa
emb	2.31871e-05	0.135081	0.172	0.08	0.272309	0	emb
s100u	2.61452e-05	0.144444	0.124	0.048	0.307049	0	s100u
egr1	2.74873e-05	0.129019	0.811	0.65	0.322811	0	egr1
myclb	2.8138e-05	0.225247	0.568	0.447	0.330453	0	myclb
asap3	2.81821e-05	0.117334	0.407	0.266	0.330971	0	asap3
mcl1a	3.02197e-05	0.164576	0.712	0.559	0.3549	0	mcl1a
nsa2	4.43302e-05	0.113536	0.989	0.95	0.520614	0	nsa2
zgc:92606	5.02315e-05	0.190294	0.37	0.246	0.589918	0	zgc:92606
mmp2	6.25574e-05	0.1959	0.384	0.255	0.734674	0	mmp2
cxcl18b	6.77024e-05	0.443344	0.22	0.121	0.795097	0	cxcl18b
fzd7b	6.78932e-05	0.107908	0.384	0.251	0.797338	0	fzd7b
sept7a	7.07615e-05	0.125103	0.124	0.05	0.831023	0	sept7a
eif1b	8.21672e-05	0.137988	0.839	0.745	0.964972	0	eif1b
jun	8.47133e-05	0.117213	1	0.939	0.994872	0	jun
pde4ba	8.81878e-05	0.166003	0.514	0.38	1	0	pde4ba
txnipa	9.29014e-05	0.203345	0.418	0.285	1	0	txnipa
si:ch73-335l21.4	0.000127803	0.199923	0.638	0.518	1	0	si:ch73-335l21.4
cx43	0.000133529	0.203978	0.633	0.533	1	0	cx43
net1	0.000149727	0.182215	0.169	0.086	1	0	net1
eif3s6ip	0.000153678	0.143614	0.619	0.49	1	0	eif3s6ip
flna	0.000158958	0.13913	0.192	0.102	1	0	flna
wnt11r	0.000182191	0.170042	0.616	0.488	1	0	wnt11r
rnf128a	0.000208662	0.130787	0.548	0.413	1	0	rnf128a
inka1a	0.000339718	0.126982	0.424	0.294	1	0	inka1a
cxcr4b	0.000391121	0.212233	0.054	0.013	1	0	cxcr4b
eif3ea	0.000434179	0.121512	0.864	0.793	1	0	eif3ea
klf6a	0.000548835	0.215115	0.537	0.426	1	0	klf6a
slc5a6b	0.000561319	0.105079	0.215	0.13	1	0	slc5a6b
gadd45ba	0.000864922	0.179373	0.41	0.305	1	0	gadd45ba
caprin1b	0.00087023	0.136292	0.333	0.235	1	0	caprin1b
srsf5a	0.000882897	0.122789	0.737	0.655	1	0	srsf5a
sox11b	0.00103611	0.172084	0.144	0.076	1	0	sox11b
junbb	0.00116937	0.116783	0.585	0.467	1	0	junbb
rpl6	0.00136973	0.104079	0.96	0.948	1	0	rpl6
her6	0.00140539	0.268281	0.266	0.179	1	0	her6
krt8	0.00197974	0.171148	0.59	0.512	1	0	krt8
ccn1	0.00216202	0.21667	0.141	0.078	1	0	ccn1
tsc22d3	0.00218594	0.11835	0.475	0.385	1	0	tsc22d3
si:dkey-159f12.2	0.00231471	0.11531	0.226	0.147	1	0	si:dkey-159f12.2
si:ch211-196l7.4	0.00233769	0.137206	0.726	0.633	1	0	si:ch211-196l7.4
klf11b	0.00260628	0.120272	0.299	0.207	1	0	klf11b
crip1	0.00271645	0.105489	0.11	0.056	1	0	crip1
zfp36l2	0.0027787	0.13177	0.107	0.054	1	0	zfp36l2
pfdn5	0.00404587	0.139452	0.26	0.184	1	0	pfdn5
cnn3a	0.00535782	0.142533	0.28	0.203	1	0	cnn3a
nt5dc2	0.00561309	0.103922	0.203	0.134	1	0	nt5dc2
jund	0.00689577	0.101898	0.571	0.464	1	0	jund
eif3c	0.00794903	0.102032	0.438	0.356	1	0	eif3c

## Sheet: Sub-cluster 1
	p_val	avg_logFC	pct.1	pct.2	p_val_adj	cluster	gene
star	1.98726e-67	1.58944	0.778	0.19	2.33384e-63	1	star
mt-co1	1.96033e-59	0.55186	1	1	2.30221e-55	1	mt-co1
mt-co2	4.55376e-55	0.414288	1	1	5.34794e-51	1	mt-co2
mt-cyb	1.37167e-42	0.465719	1	0.994	1.61089e-38	1	mt-cyb
gatm	5.34091e-42	0.950441	0.7	0.262	6.27237e-38	1	gatm
SERP1	3.95533e-38	0.400469	1	1	4.64514e-34	1	SERP1
fosb1	4.37908e-33	0.669396	0.952	0.801	5.14279e-29	1	fosb
aqp12	7.56433e-29	0.593064	0.879	0.608	8.88355e-25	1	aqp12
tob1b	9.05274e-29	0.708083	0.85	0.615	1.06315e-24	1	tob1b
hsp70.3	1.20819e-28	0.526053	0.981	0.95	1.4189e-24	1	hsp70.3
gch1	2.84122e-28	0.362999	0.382	0.076	3.33673e-24	1	gch1
ubb	1.31494e-27	0.692573	0.894	0.664	1.54426e-23	1	ubb
gramd1a	4.69419e-27	0.679108	0.778	0.459	5.51286e-23	1	gramd1a
mt-co3	7.71477e-27	0.347979	1	1	9.06023e-23	1	mt-co3
hsp70.2	2.85197e-26	0.654815	0.976	0.863	3.34935e-22	1	hsp70.2
hsp70.1	5.75148e-26	0.671587	0.932	0.797	6.75453e-22	1	hsp70.1
hsp90aa1.2	1.01132e-24	0.904929	0.821	0.553	1.1877e-20	1	hsp90aa1.2
bean1	1.88497e-23	0.314643	0.338	0.072	2.2137e-19	1	bean1
krt81	6.27212e-22	0.679002	0.778	0.472	7.36597e-18	1	krt8
CABZ01084501.3	2.61826e-21	0.896211	0.531	0.221	3.07489e-17	1	CABZ01084501.3
slc51a	8.6348e-21	0.287566	0.353	0.091	1.01407e-16	1	slc51a
mat1a	1.8061e-20	0.253379	0.246	0.039	2.12109e-16	1	mat1a
slc4a4a	2.7623e-20	0.500794	0.783	0.52	3.24404e-16	1	slc4a4a
eif4ebp1	3.78865e-20	0.381899	0.966	0.893	4.4494e-16	1	eif4ebp1
plcg2	1.32451e-19	0.370395	0.377	0.115	1.5555e-15	1	plcg2
ets2	1.38249e-19	0.615421	0.628	0.323	1.6236e-15	1	ets2
aste1a	2.51559e-19	0.644093	0.42	0.139	2.95431e-15	1	aste1a
midn	3.1041e-19	0.776004	0.623	0.335	3.64546e-15	1	midn
prdx2	4.50618e-19	0.55378	0.758	0.577	5.29206e-15	1	prdx2
zgc:162608	6.06734e-19	0.620953	0.353	0.101	7.12549e-15	1	zgc:162608
fdx1b	1.08044e-18	0.424214	0.986	0.966	1.26887e-14	1	fdx1b
tjp2b	1.56142e-18	0.501102	0.488	0.197	1.83373e-14	1	tjp2b
btg1	1.66251e-18	0.487703	0.889	0.727	1.95245e-14	1	btg1
gtf2b	2.09452e-18	0.354747	0.304	0.073	2.45981e-14	1	gtf2b
srgap3	3.57381e-18	0.26883	0.29	0.067	4.19708e-14	1	srgap3
cd63	4.91726e-18	0.472935	0.531	0.237	5.77482e-14	1	cd63
krt91	5.03965e-18	0.730043	0.894	0.842	5.91857e-14	1	krt91
hsp70l	7.50739e-18	0.783948	0.787	0.531	8.81668e-14	1	hsp70l
tdh	8.93616e-18	0.573679	0.507	0.227	1.04946e-13	1	tdh
cited4a	1.28528e-17	0.820272	0.633	0.387	1.50943e-13	1	cited4a
2020-06-01	2.43704e-17	0.381618	1	0.952	2.86206e-13	1	jun
plxnc1	2.92818e-17	0.226342	0.242	0.048	3.43886e-13	1	plxnc1
UBB	4.94026e-17	0.569003	0.715	0.462	5.80184e-13	1	UBB
frya	6.29706e-17	0.350786	0.42	0.158	7.39527e-13	1	frya
zfp36l1b	7.47535e-16	0.568835	0.536	0.266	8.77905e-12	1	zfp36l1b
rarres3l	8.26891e-16	0.266062	0.246	0.056	9.71101e-12	1	rarres3l
cyba	8.28797e-16	0.338204	0.459	0.197	9.7334e-12	1	cyba
bhlhe40	3.0147e-15	0.611547	0.671	0.434	3.54047e-11	1	bhlhe40
CABZ01074994.1	4.24168e-15	0.357113	0.671	0.379	4.98143e-11	1	CABZ01074994.1
ccng2	5.14075e-15	0.460606	0.522	0.244	6.03729e-11	1	ccng2
c2cd4a	6.19162e-15	0.489122	0.29	0.088	7.27144e-11	1	c2cd4a
egr11	7.18587e-15	0.462092	0.855	0.671	8.43909e-11	1	egr1
atf3	1.13321e-14	0.639004	0.498	0.249	1.33084e-10	1	atf3
rsrp1	1.15961e-14	0.416697	0.71	0.488	1.36185e-10	1	rsrp1
hs3st4	1.35808e-14	0.110974	0.13	0.012	1.59493e-10	1	hs3st4
krt18a.1	1.36476e-14	0.566202	0.251	0.063	1.60278e-10	1	krt18a.1
nr5a1b	1.6605e-14	0.341868	0.657	0.387	1.95009e-10	1	nr5a1b
gabarapa	1.81284e-14	0.364471	0.449	0.194	2.129e-10	1	gabarapa
sec61g	3.5533e-14	0.26637	0.952	0.921	4.173e-10	1	sec61g
si:ch73-335l21.41	3.73621e-14	0.590318	0.744	0.512	4.38781e-10	1	si:ch73-335l21.4
mctp1b	3.99842e-14	0.324411	0.551	0.282	4.69574e-10	1	mctp1b
ppp1r1c	4.70903e-14	0.380796	0.56	0.314	5.53029e-10	1	ppp1r1c
ddit3	9.27864e-14	0.516463	0.614	0.368	1.08968e-09	1	ddit3
cyp17a1	9.37094e-14	0.406435	0.947	0.942	1.10052e-09	1	cyp17a1
pof1b	1.55126e-13	0.154977	0.14	0.018	1.82179e-09	1	pof1b
id2b	1.56734e-13	0.712211	0.498	0.25	1.84068e-09	1	id2b
ccdc47	2.01872e-13	0.233003	0.208	0.045	2.37079e-09	1	ccdc47
spock3	2.03471e-13	0.224408	0.28	0.085	2.38956e-09	1	spock3
actb2	2.43368e-13	0.435305	0.923	0.867	2.85812e-09	1	actb2
lama5	4.6886e-13	0.253665	0.193	0.041	5.50629e-09	1	lama5
dusp5	8.57078e-13	0.489751	0.444	0.193	1.00655e-08	1	dusp5
cldn11a	9.25907e-13	0.59505	0.478	0.235	1.08739e-08	1	cldn11a
prdx3	1.03356e-12	0.38514	0.652	0.449	1.21381e-08	1	prdx3
gpx1a	1.05798e-12	0.364088	0.899	0.833	1.24249e-08	1	gpx1a
klf6a1	1.09947e-12	0.572039	0.643	0.418	1.29121e-08	1	klf6a
map1aa	1.41284e-12	0.222336	0.275	0.088	1.65924e-08	1	map1aa
tuba8l2	2.23788e-12	0.253141	0.314	0.115	2.62817e-08	1	tuba8l2
gstz1	2.69674e-12	0.334467	0.275	0.091	3.16705e-08	1	gstz1
cox7a1	6.08086e-12	0.30429	0.874	0.746	7.14136e-08	1	cox7a1
h3f3d	7.14097e-12	0.423051	0.696	0.513	8.38635e-08	1	h3f3d
atp5if1b	7.28094e-12	0.320718	0.488	0.24	8.55074e-08	1	atp5if1b
ctnnd2a	7.64836e-12	0.223084	0.193	0.047	8.98224e-08	1	ctnnd2a
slc43a1b	9.02114e-12	0.162555	0.193	0.047	1.05944e-07	1	slc43a1b
mdh1aa	1.35946e-11	0.432556	0.647	0.442	1.59655e-07	1	mdh1aa
mao	1.81384e-11	0.112219	0.14	0.023	2.13018e-07	1	mao
aldh2.2	1.83984e-11	0.356845	0.401	0.18	2.16071e-07	1	aldh2.2
b2ml	1.98633e-11	0.34643	0.821	0.693	2.33274e-07	1	b2ml
cox5b2	2.0859e-11	0.236071	0.343	0.136	2.44968e-07	1	cox5b2
aldob	2.2168e-11	0.405845	0.454	0.227	2.60341e-07	1	aldob
si:zfos-943e10.1	2.61141e-11	0.245826	0.193	0.048	3.06684e-07	1	si:zfos-943e10.1
oaz1a	2.83096e-11	0.44527	0.551	0.333	3.32468e-07	1	oaz1a
mt-atp6	3.48856e-11	0.327044	0.894	0.795	4.09696e-07	1	mt-atp6
pnrc21	4.02555e-11	0.305702	0.976	0.934	4.72761e-07	1	pnrc2
cyb5a	5.61038e-11	0.37513	0.7	0.522	6.58883e-07	1	cyb5a
mknk2b	6.21024e-11	0.398981	0.478	0.246	7.2933e-07	1	mknk2b
serpinf1	6.48306e-11	0.303991	0.449	0.23	7.61371e-07	1	serpinf1
dhrs9	7.73059e-11	0.148278	0.116	0.016	9.07881e-07	1	dhrs9
grb2b	7.76157e-11	0.19156	0.15	0.029	9.11519e-07	1	grb2b
dnajb1b	1.32241e-10	0.422372	0.812	0.684	1.55303e-06	1	dnajb1b
cst3	1.47221e-10	0.350197	0.647	0.442	1.72896e-06	1	cst3
aldh6a1	1.49053e-10	0.32636	0.657	0.453	1.75048e-06	1	aldh6a1
plekha6	1.78449e-10	0.169458	0.198	0.056	2.0957e-06	1	plekha6
zdhhc9	2.53793e-10	0.116181	0.155	0.034	2.98055e-06	1	zdhhc9
CABZ01077217.1	3.73842e-10	0.206628	0.28	0.107	4.39041e-06	1	CABZ01077217.1
p4ha1b	4.59743e-10	0.21441	0.155	0.035	5.39922e-06	1	p4ha1b
prkag2a	5.06023e-10	0.382459	0.459	0.254	5.94273e-06	1	prkag2a
si:ch211-139a5.9	5.47136e-10	0.203599	0.227	0.076	6.42557e-06	1	si:ch211-139a5.9
pcdh7a	5.52052e-10	0.123146	0.145	0.031	6.4833e-06	1	pcdh7a
mt-nd4	7.37756e-10	0.318069	0.841	0.718	8.6642e-06	1	mt-nd4
cbx7a	7.38678e-10	0.401509	0.536	0.31	8.67504e-06	1	cbx7a
ndufa4l	9.80047e-10	0.240255	0.894	0.865	1.15097e-05	1	ndufa4l
mertka	1.05411e-09	0.168978	0.28	0.108	1.23795e-05	1	mertka
pmaip1	1.15513e-09	0.268196	0.155	0.037	1.35658e-05	1	pmaip1
tnfrsf21	2.25588e-09	0.116181	0.14	0.031	2.64931e-05	1	tnfrsf21
nrip1b	2.38428e-09	0.2309	0.372	0.18	2.8001e-05	1	nrip1b
park7	3.02134e-09	0.211782	0.203	0.064	3.54826e-05	1	park7
cebpd	3.50757e-09	0.412335	0.498	0.273	4.11929e-05	1	cebpd
gcdha	4.06329e-09	0.179433	0.372	0.178	4.77193e-05	1	gcdha
nr0b2a	4.08692e-09	0.152845	0.111	0.019	4.79968e-05	1	nr0b2a
ccdc187	4.10772e-09	0.298978	0.28	0.114	4.82411e-05	1	ccdc187
rdh10b	4.96196e-09	0.327076	0.15	0.037	5.82732e-05	1	rdh10b
fosab1	5.38224e-09	0.251674	1	0.943	6.3209e-05	1	fosab
elocb	6.94098e-09	0.229373	0.246	0.094	8.15149e-05	1	elocb
hmgn3	9.01453e-09	0.174657	0.159	0.044	0.000105867	1	hmgn3
dcun1d2b	1.26457e-08	0.141651	0.251	0.098	0.000148511	1	dcun1d2b
tuba8l4	1.28969e-08	0.457703	0.449	0.265	0.000151461	1	tuba8l4
dennd5b	1.36726e-08	0.155352	0.222	0.08	0.000160572	1	dennd5b
pygmb	1.38e-08	0.141809	0.155	0.042	0.000162068	1	pygmb
slc25a39	1.55187e-08	0.166715	0.13	0.029	0.000182252	1	slc25a39
jdp2b1	2.35945e-08	0.358703	0.879	0.73	0.000277094	1	jdp2b
stk17a	2.38606e-08	0.139017	0.203	0.07	0.000280219	1	stk17a
sqstm1	2.38754e-08	0.317094	0.246	0.099	0.000280392	1	sqstm1
jund1	2.42649e-08	0.331782	0.647	0.463	0.000284967	1	jund
ier51	2.53956e-08	0.353869	0.744	0.577	0.000298245	1	ier5
brd2a	2.60121e-08	0.299547	0.391	0.209	0.000305486	1	brd2a
mcl1a1	2.6161e-08	0.443367	0.734	0.585	0.000307234	1	mcl1a
gabarapb	2.80753e-08	0.295478	0.633	0.478	0.000329716	1	gabarapb
gstr	4.71666e-08	0.308773	0.411	0.225	0.000553924	1	gstr
CABZ01080568.1	5.43975e-08	0.130947	0.15	0.042	0.000638844	1	CABZ01080568.1
rnf7	5.81858e-08	0.301421	0.478	0.282	0.000683334	1	rnf7
hagh	6.94604e-08	0.128758	0.198	0.07	0.000815743	1	hagh
hipk3a	9.08997e-08	0.168491	0.251	0.107	0.00106753	1	hipk3a
mt-nd2	9.38185e-08	0.351674	0.652	0.528	0.0011018	1	mt-nd2
per3	9.52744e-08	0.16014	0.14	0.038	0.0011189	1	per3
sik1	1.02838e-07	0.238929	0.15	0.044	0.00120773	1	sik1
pnp5a	1.03858e-07	0.144222	0.097	0.018	0.00121971	1	pnp5a
cox6b2	1.03883e-07	0.181628	0.971	0.953	0.00122	1	cox6b2
rnd1b	1.11057e-07	0.132482	0.251	0.104	0.00130426	1	rnd1b
iscub	1.27169e-07	0.287541	0.343	0.173	0.00149348	1	iscub
fndc3a	1.31705e-07	0.145973	0.242	0.099	0.00154674	1	fndc3a
arl6ip1	1.46952e-07	0.288294	0.382	0.2	0.00172581	1	arl6ip1
ppifb	1.48286e-07	0.158423	0.164	0.051	0.00174147	1	ppifb
caskin1	1.57979e-07	0.257942	0.415	0.243	0.0018553	1	caskin1
si:ch1073-385f13.3	1.72962e-07	0.171428	0.13	0.035	0.00203126	1	si:ch1073-385f13.3
pbxip1b	1.76047e-07	0.230556	0.333	0.161	0.0020675	1	pbxip1b
pgrmc1	2.00352e-07	0.17737	0.976	0.977	0.00235293	1	pgrmc1
cyp11a2	2.15292e-07	0.168627	0.99	0.997	0.00252839	1	cyp11a2
sod2	2.24942e-07	0.264086	0.357	0.193	0.00264172	1	sod2
tsc22d31	2.62023e-07	0.309259	0.575	0.374	0.0030772	1	tsc22d3
n4bp1	2.78393e-07	0.220942	0.213	0.086	0.00326944	1	n4bp1
ncoa4	2.9748e-07	0.140053	0.121	0.031	0.0034936	1	ncoa4
fasn	3.05309e-07	0.12652	0.116	0.028	0.00358555	1	fasn
plekha7b	4.17581e-07	0.130796	0.213	0.085	0.00490407	1	plekha7b
cox8b	4.64399e-07	0.217355	0.3	0.145	0.0054539	1	cox8b
laptm4a	4.79283e-07	0.283403	0.314	0.167	0.00562869	1	laptm4a
slmapb	4.85931e-07	0.189542	0.164	0.056	0.00570677	1	slmapb
fuca2	5.56013e-07	0.116263	0.097	0.02	0.00652982	1	fuca2
mettl7a	6.15835e-07	0.122502	0.242	0.105	0.00723236	1	mettl7a
pik3r2	6.15957e-07	0.191153	0.324	0.161	0.00723379	1	pik3r2
pim1	6.71209e-07	0.382815	0.28	0.139	0.00788267	1	pim1
atp5l	7.32169e-07	0.279348	0.744	0.636	0.0085986	1	atp5l
rhoab	8.18449e-07	0.329676	0.242	0.11	0.00961187	1	rhoab
per1b	9.63894e-07	0.209422	0.217	0.092	0.01132	1	per1b
fthl27	1.24685e-06	0.270242	0.899	0.848	0.014643	1	fthl27
CR383676.1	1.41831e-06	0.117878	1	1	0.0166566	1	CR383676.1
stk17al	1.81971e-06	0.108039	0.068	0.01	0.0213706	1	stk17al
itm2bb	1.8819e-06	0.270467	0.459	0.291	0.0221011	1	itm2bb
porb	2.05592e-06	0.233828	0.502	0.341	0.0241447	1	porb
dusp1	2.07111e-06	0.311338	0.367	0.208	0.0243232	1	dusp1
ppdpfb	2.14388e-06	0.751253	0.686	0.617	0.0251777	1	ppdpfb
prelid3b	2.1599e-06	0.272545	0.425	0.268	0.0253659	1	prelid3b
gpx4a	2.2304e-06	0.178713	0.261	0.12	0.0261938	1	gpx4a
tjp1a	2.23279e-06	0.205131	0.213	0.094	0.0262219	1	tjp1a
rnaseka	2.23477e-06	0.146375	0.145	0.048	0.0262452	1	rnaseka
FAT4	2.39216e-06	0.139817	0.271	0.133	0.0280936	1	FAT4
rhov	2.52993e-06	0.281229	0.488	0.341	0.0297114	1	rhov
bhmt	2.58833e-06	0.246273	0.121	0.037	0.0303973	1	bhmt
plxna4	2.69802e-06	0.236477	0.464	0.308	0.0316855	1	plxna4
coq8a	3.09631e-06	0.213606	0.251	0.121	0.036363	1	coq8a
dldh	3.44801e-06	0.216335	0.42	0.246	0.0404934	1	dldh
clpxa	3.81462e-06	0.134084	0.266	0.13	0.0447989	1	clpxa
arrdc3b	3.84291e-06	0.275128	0.329	0.178	0.0451311	1	arrdc3b
rpz5	3.92642e-06	0.223998	0.266	0.127	0.0461119	1	rpz5
arih2	4.06469e-06	0.264573	0.43	0.263	0.0477357	1	arih2
igf1rb	4.45284e-06	0.233991	0.454	0.298	0.0522942	1	igf1rb
ier2b1	4.7101e-06	0.244382	0.889	0.753	0.0553154	1	ier2b
aldh7a1	4.8904e-06	0.258166	0.386	0.238	0.0574329	1	aldh7a1
sox9b	5.20875e-06	0.180968	0.198	0.086	0.0611715	1	sox9b
ndufb3	5.2995e-06	0.136097	0.164	0.061	0.0622374	1	ndufb3
hspa5	5.3428e-06	0.371899	0.324	0.181	0.0627458	1	hspa5
cracr2b	6.94598e-06	0.220061	0.652	0.504	0.0815736	1	cracr2b
rbm47	7.21472e-06	0.108555	0.203	0.089	0.0847296	1	rbm47
echs1	7.3909e-06	0.199233	0.382	0.219	0.0867988	1	echs1
kidins220a	7.68042e-06	0.122817	0.106	0.031	0.0901988	1	kidins220a
ppp1r3cb	7.7235e-06	0.100667	0.174	0.07	0.0907048	1	ppp1r3cb
slc20a1b	8.65949e-06	0.264307	0.217	0.102	0.101697	1	slc20a1b
b2m	9.09535e-06	0.28426	0.913	0.905	0.106816	1	b2m
edil3a	9.37233e-06	0.133644	0.198	0.086	0.110069	1	edil3a
zgc:92481	9.54137e-06	0.115024	0.203	0.091	0.112054	1	zgc:92481
capza1b	1.01477e-05	0.169724	0.174	0.072	0.119175	1	capza1b
odc1	1.04547e-05	0.120223	0.082	0.019	0.12278	1	odc1
nupr1b1	1.07321e-05	0.273897	0.928	0.835	0.126037	1	nupr1b
selenop	1.11149e-05	0.250953	0.71	0.627	0.130534	1	selenop
slc38a3b	1.13108e-05	0.106315	0.135	0.048	0.132835	1	slc38a3b
zfand5b	1.15091e-05	0.342991	0.242	0.123	0.135163	1	zfand5b
spink2.1	1.19886e-05	0.15879	0.106	0.031	0.140795	1	spink2.1
atp6v1e1b	1.24705e-05	0.121579	0.145	0.053	0.146454	1	atp6v1e1b
cox6a2	1.26155e-05	0.214	0.773	0.747	0.148156	1	cox6a2
zeb2a	1.27806e-05	0.132813	0.251	0.127	0.150096	1	zeb2a
rarga	1.2944e-05	0.102129	0.145	0.054	0.152014	1	rarga
selenow1	1.3554e-05	0.268477	0.3	0.167	0.159178	1	selenow1
ndnf	1.38263e-05	0.249047	0.449	0.288	0.162376	1	ndnf
slc16a10	1.41277e-05	0.17326	0.671	0.49	0.165916	1	slc16a10
tgfbr3	1.41316e-05	0.133958	0.29	0.158	0.165961	1	tgfbr3
atp1b1a	1.45584e-05	0.401621	0.638	0.573	0.170974	1	atp1b1a
uba1	1.52902e-05	0.157687	0.198	0.088	0.179568	1	uba1
sod1	1.56022e-05	0.245704	0.493	0.336	0.183233	1	sod1
phb	1.56732e-05	0.158185	0.135	0.048	0.184066	1	phb
map1lc3a	1.61764e-05	0.166107	0.213	0.098	0.189976	1	map1lc3a
alkbh3.1	1.6252e-05	0.349643	0.536	0.395	0.190863	1	alkbh3.1
mob4	1.71724e-05	0.109943	0.126	0.042	0.201673	1	mob4
dclre1c	2.09705e-05	0.141079	0.256	0.136	0.246278	1	dclre1c
idh3b	2.19473e-05	0.151115	0.135	0.05	0.257749	1	idh3b
si:ch73-141c7.1	2.22947e-05	0.236009	0.348	0.211	0.261829	1	si:ch73-141c7.1
ctsba	2.26488e-05	0.231478	0.15	0.058	0.265988	1	ctsba
dop1b	2.79275e-05	0.100751	0.145	0.057	0.327981	1	dop1b
serinc1	2.82862e-05	0.178183	0.333	0.189	0.332193	1	serinc1
tmem59	3.46138e-05	0.151143	0.217	0.104	0.406504	1	tmem59
atp6ap2	3.5642e-05	0.122183	0.116	0.039	0.418579	1	atp6ap2
cd164	3.59509e-05	0.109733	0.145	0.056	0.422207	1	cd164
hif1ab	4.15618e-05	0.164468	0.256	0.135	0.488101	1	hif1ab
atg13	4.43141e-05	0.105929	0.135	0.051	0.520424	1	atg13
psme2	4.45194e-05	0.173167	0.179	0.077	0.522836	1	psme2
ahcy	4.63483e-05	0.227085	0.821	0.808	0.544314	1	ahcy
mt-nd5	4.75496e-05	0.199585	0.372	0.228	0.558422	1	mt-nd5
tubb4b	4.89019e-05	0.327233	0.415	0.282	0.574304	1	tubb4b
bloc1s6	4.968e-05	0.103453	0.097	0.029	0.583441	1	bloc1s6
med30	5.07584e-05	0.159481	0.285	0.165	0.596107	1	med30
cbx8b	5.25767e-05	0.147854	0.193	0.094	0.61746	1	cbx8b
appa	5.27485e-05	0.141863	0.242	0.124	0.619478	1	appa
nfkbiab	5.45236e-05	0.360009	0.372	0.237	0.640326	1	nfkbiab
atp6v1h	5.60562e-05	0.113434	0.213	0.105	0.658324	1	atp6v1h
akap13	6.03045e-05	0.127153	0.13	0.05	0.708216	1	akap13
RASSF5	6.0877e-05	0.107062	0.319	0.181	0.71494	1	RASSF5
si:dkeyp-44a8.2	6.23488e-05	0.151387	0.213	0.104	0.732224	1	si:dkeyp-44a8.2
hspa8	6.24274e-05	0.246549	0.715	0.604	0.733147	1	hspa8
nfyc	6.42834e-05	0.115044	0.188	0.085	0.754944	1	nfyc
ssr3	6.47532e-05	0.181754	0.517	0.351	0.760461	1	ssr3
si:dkey-204f11.64	6.94281e-05	0.109733	0.208	0.104	0.815364	1	si:dkey-204f11.64
ppp1r14bb	7.15988e-05	0.207753	0.386	0.251	0.840856	1	ppp1r14bb
enosf1	8.43745e-05	0.136129	0.275	0.156	0.990894	1	enosf1
prkar2aa	9.09818e-05	0.201435	0.7	0.624	1	1	prkar2aa
bhlhe41	9.41925e-05	0.104691	0.155	0.067	1	1	bhlhe41
nfkbiaa	9.42923e-05	0.252093	0.174	0.08	1	1	nfkbiaa
prdx5	0.000102272	0.174552	0.744	0.661	1	1	prdx5
snx17	0.000106064	0.120213	0.29	0.168	1	1	snx17
ndufb2	0.000108764	0.17667	0.246	0.135	1	1	ndufb2
errfi1a	0.000111656	0.123708	0.155	0.067	1	1	errfi1a
lifrb	0.000117072	0.200658	0.367	0.246	1	1	lifrb
adipor2	0.000118936	0.144331	0.242	0.129	1	1	adipor2
slc25a23a	0.000121576	0.111779	0.246	0.136	1	1	slc25a23a
myl12.2	0.000125065	0.12291	0.135	0.056	1	1	myl12.2
mt-nd3	0.000137565	0.179804	0.3	0.175	1	1	mt-nd3
chmp4ba	0.000139719	0.105538	0.15	0.064	1	1	chmp4ba
irf9	0.000145391	0.101828	0.193	0.095	1	1	irf9
gata6	0.000145855	0.151196	0.213	0.11	1	1	gata6
h3f3a	0.000146012	0.182081	0.198	0.096	1	1	h3f3a
hsf2	0.000153882	0.115394	0.111	0.041	1	1	hsf2
acadl	0.000155696	0.108415	0.14	0.058	1	1	acadl
zgc:123105	0.000161852	0.122502	0.13	0.053	1	1	zgc:123105
cdkn1bb	0.00016958	0.203462	0.295	0.18	1	1	cdkn1bb
atp5fa1	0.000181629	0.248738	0.507	0.392	1	1	atp5fa1
sorcs2	0.00018822	0.101768	0.217	0.115	1	1	sorcs2
islr2	0.000195375	0.132531	0.246	0.136	1	1	islr2
zgc:100918	0.000200229	0.104379	0.15	0.066	1	1	zgc:100918
si:ch211-132p1.3	0.000224335	0.295648	0.13	0.056	1	1	si:ch211-132p1.3
nme2a	0.00024152	0.22144	0.676	0.601	1	1	nme2a
tsc22d1	0.0002465	0.192119	0.29	0.173	1	1	tsc22d1
chmp1b	0.000253695	0.101974	0.121	0.048	1	1	chmp1b
ndufb9	0.000284483	0.160771	0.3	0.181	1	1	ndufb9
cltca	0.000284978	0.148228	0.188	0.095	1	1	cltca
ulk2	0.000296209	0.120551	0.261	0.151	1	1	ulk2
selenok	0.000305577	0.141539	0.232	0.127	1	1	selenok
sf3b1	0.000323248	0.138895	0.217	0.117	1	1	sf3b1
pabpc1b	0.000336425	0.129314	0.971	0.953	1	1	pabpc1b
mpv17	0.000350374	0.190778	0.319	0.205	1	1	mpv17
si:ch73-281n10.2	0.000362866	0.1435	0.406	0.27	1	1	si:ch73-281n10.2
irf2bp2b1	0.000369587	0.21898	0.454	0.333	1	1	irf2bp2b
hnrnpm	0.000385442	0.108748	0.101	0.038	1	1	hnrnpm
btg21	0.000387626	0.153118	0.957	0.882	1	1	btg2
csnk2b	0.000398406	0.15749	0.329	0.206	1	1	csnk2b
nr2f2	0.00041232	0.163384	0.314	0.196	1	1	nr2f2
zgc:194659	0.000431226	0.142006	0.184	0.095	1	1	zgc:194659
anks1b	0.000472504	0.117882	0.386	0.262	1	1	anks1b
rps27l	0.000472653	0.216346	0.527	0.414	1	1	rps27l
abhd15a	0.00051004	0.12469	0.145	0.067	1	1	abhd15a
qkia	0.000530628	0.171216	0.256	0.154	1	1	qkia
ivd	0.000546382	0.103953	0.179	0.089	1	1	ivd
sdhb	0.000550051	0.121628	0.164	0.08	1	1	sdhb
mgst1.1	0.000571818	0.105538	0.227	0.13	1	1	mgst1.1
ndrg4	0.000572202	0.128376	0.14	0.066	1	1	ndrg4
gadd45ab	0.000581629	0.167342	0.227	0.127	1	1	gadd45ab
napepld	0.000622798	0.124902	0.251	0.154	1	1	napepld
greb1l	0.000645115	0.109143	0.242	0.143	1	1	greb1l
micos10	0.000713738	0.131047	0.135	0.063	1	1	micos10
tiparp	0.000746457	0.124798	0.213	0.118	1	1	tiparp
DDX17	0.000748661	0.159437	0.29	0.18	1	1	DDX17
ppt1	0.000765347	0.154392	0.198	0.108	1	1	ppt1
fdx1	0.000770675	0.112627	0.111	0.047	1	1	fdx1
dio1	0.000794864	0.173588	0.329	0.227	1	1	dio1
prkar1aa	0.00083012	0.102912	0.203	0.113	1	1	prkar1aa
eno1a	0.000888717	0.124798	0.285	0.173	1	1	eno1a
cx431	0.000896715	0.267951	0.628	0.556	1	1	cx43
chtopa	0.000902301	0.173029	0.304	0.193	1	1	chtopa
mbnl2	0.000949916	0.112326	0.396	0.272	1	1	mbnl2
ca8	0.000994976	0.148273	0.309	0.209	1	1	ca8
klf11b1	0.00105397	0.150403	0.333	0.216	1	1	klf11b
nr2f1a	0.00111256	0.146568	0.797	0.753	1	1	nr2f1a
grtp1a	0.00116853	0.105148	0.266	0.167	1	1	grtp1a
zgc:103700	0.00117529	0.224038	0.087	0.034	1	1	zgc:103700
ptp4a2b	0.00127925	0.189717	0.184	0.104	1	1	ptp4a2b
hspb1	0.00138136	0.420898	0.188	0.107	1	1	hspb1
cox7c	0.00138438	0.133381	0.28	0.173	1	1	cox7c
ccni	0.00139354	0.125344	0.85	0.822	1	1	ccni
mt-nd1	0.00140683	0.254918	0.493	0.408	1	1	mt-nd1
slc25a47a	0.00143344	0.111442	0.237	0.142	1	1	slc25a47a
tpm1	0.00146009	0.191566	0.444	0.335	1	1	tpm1
tnrc6a	0.00148635	0.115895	0.135	0.066	1	1	tnrc6a
dbpb	0.00151745	0.156553	0.261	0.168	1	1	dbpb
atp5po	0.00157896	0.144093	0.473	0.348	1	1	atp5po
bckdhb	0.00167741	0.104034	0.169	0.091	1	1	bckdhb
ndufb7	0.00168773	0.149871	0.256	0.161	1	1	ndufb7
hadhb	0.00169604	0.111552	0.159	0.083	1	1	hadhb
npc2	0.00170593	0.114599	0.111	0.05	1	1	npc2
wbp2nl	0.00173256	0.162738	0.193	0.113	1	1	wbp2nl
myl12.1	0.0017424	0.15659	0.319	0.211	1	1	myl12.1
mphosph8	0.0018504	0.194745	0.531	0.444	1	1	mphosph8
mbpb	0.00193034	0.105408	0.357	0.246	1	1	mbpb
rab1ab	0.00194828	0.122602	0.126	0.061	1	1	rab1ab
ndufs2	0.00197227	0.101541	0.174	0.094	1	1	ndufs2
sesn1	0.00198097	0.166754	0.184	0.102	1	1	sesn1
chchd10	0.00198813	0.105783	0.121	0.057	1	1	chchd10
cd74b	0.00199664	0.283632	0.174	0.096	1	1	cd74b
sdhc	0.00207772	0.105274	0.174	0.095	1	1	sdhc
hnrnpub	0.00208696	0.136999	0.164	0.091	1	1	hnrnpub
atp5pb	0.0021685	0.193062	0.411	0.298	1	1	atp5pb
tp53inp1	0.00217973	0.145945	0.188	0.108	1	1	tp53inp1
blcap	0.00221698	0.145588	0.203	0.121	1	1	blcap
ptmaa	0.00238229	0.105929	0.227	0.135	1	1	ptmaa
zgc:162944	0.00238696	0.147821	0.319	0.213	1	1	zgc:162944
ifi30	0.00242513	0.214801	0.179	0.101	1	1	ifi30
fez1	0.00245757	0.105242	0.232	0.145	1	1	fez1
atp5mc3b	0.0024831	0.104848	0.908	0.937	1	1	atp5mc3b
asph	0.00260509	0.165806	0.464	0.365	1	1	asph
rab2a	0.00264654	0.10577	0.217	0.13	1	1	rab2a
atf4a	0.00267184	0.211493	0.493	0.39	1	1	atf4a
acat1	0.00278502	0.125783	0.198	0.117	1	1	acat1
junbb1	0.0028706	0.173846	0.58	0.494	1	1	junbb
gabarapl2	0.00304872	0.127955	0.179	0.104	1	1	gabarapl2
ndfip2	0.00318799	0.139877	0.333	0.243	1	1	ndfip2
ncor1	0.0031993	0.104379	0.13	0.066	1	1	ncor1
serinc2	0.00322499	0.143053	0.29	0.197	1	1	serinc2
rnf19a	0.00337066	0.153594	0.208	0.127	1	1	rnf19a
edf1	0.0033785	0.173272	0.517	0.44	1	1	edf1
mccc1	0.0036706	0.101633	0.203	0.124	1	1	mccc1
aifm1	0.00386396	0.165162	0.217	0.136	1	1	aifm1
gadd45ga	0.00408664	0.29402	0.135	0.072	1	1	gadd45ga
mbnl3	0.00426771	0.112148	0.217	0.133	1	1	mbnl3
ddx5	0.00459094	0.13756	0.256	0.165	1	1	ddx5
ppm1k	0.00460533	0.10736	0.271	0.186	1	1	ppm1k
sumo3a	0.00482021	0.144206	0.203	0.123	1	1	sumo3a
rbms2a	0.00485404	0.132994	0.319	0.234	1	1	rbms2a
si:busm1-266f07.2	0.00490682	0.153353	0.077	0.032	1	1	si:busm1-266f07.2
lgals3b	0.00525776	0.102912	0.145	0.079	1	1	lgals3b
hipk3b	0.00589265	0.110149	0.237	0.159	1	1	hipk3b
cdh2	0.00590121	0.105211	0.348	0.247	1	1	cdh2
cnn3a1	0.00595392	0.119683	0.309	0.211	1	1	cnn3a
pin1	0.00630833	0.109967	0.295	0.199	1	1	pin1
srrm2	0.00668334	0.104379	0.116	0.06	1	1	srrm2
bzw1b	0.00692231	0.168379	0.164	0.095	1	1	bzw1b
gbp	0.00713529	0.172493	0.391	0.297	1	1	gbp
nfil3-6	0.00778148	0.135947	0.155	0.092	1	1	nfil3-6
decr1	0.00791926	0.119845	0.256	0.177	1	1	decr1
wu:fj16a03	0.00796645	0.266029	0.111	0.058	1	1	wu:fj16a03
relb	0.00802863	0.105783	0.164	0.099	1	1	relb
mafba	0.00818331	0.213731	0.227	0.151	1	1	mafba
tra2a	0.00822843	0.100408	0.145	0.083	1	1	tra2a
oaz1b	0.00843985	0.163461	0.628	0.563	1	1	oaz1b
BX936337.1	0.00858817	0.101596	0.159	0.094	1	1	BX936337.1

## Sheet: Sub-cluster 2
	p_val	avg_logFC	pct.1	pct.2	p_val_adj	cluster	gene
rps13	3.53354e-24	0.177698	1	1	4.1498e-20	2	rps13
rps121	3.09429e-22	0.180857	1	1	3.63393e-18	2	rps12
rpl181	3.39143e-22	0.169862	1	1	3.9829e-18	2	rpl18
rps15a	4.98646e-22	0.173677	1	1	5.8561e-18	2	rps15a
rps14	1.22269e-20	0.15616	1	1	1.43592e-16	2	rps14
rpl12	2.46478e-20	0.145911	1	1	2.89464e-16	2	rpl12
rpl27	3.96286e-20	0.164326	1	1	4.65399e-16	2	rpl27
rplp2l	1.0829e-19	0.19593	1	1	1.27175e-15	2	rplp2l
rpl13a	1.34599e-19	0.138201	1	1	1.58073e-15	2	rpl13a
rpl31	1.78494e-19	0.165952	1	1	2.09623e-15	2	rpl31
rps16	1.02747e-18	0.152323	1	1	1.20666e-14	2	rps16
rpl18a1	1.98743e-18	0.148958	1	1	2.33404e-14	2	rpl18a
rpl33	3.86329e-18	0.194218	1	0.999	4.53705e-14	2	rpl3
rpl35	8.06822e-18	0.172502	1	1	9.47532e-14	2	rpl35
rpl7a1	8.37939e-18	0.141959	1	1	9.84076e-14	2	rpl7a
rps8a1	1.0049e-17	0.159558	1	1	1.18016e-13	2	rps8a
rpl30	1.34315e-17	0.161996	1	1	1.57739e-13	2	rpl30
rpl231	1.44041e-17	0.143402	1	1	1.69161e-13	2	rpl23
rpl11	4.80967e-17	0.13976	1	1	5.64848e-13	2	rpl11
rpl17	1.45712e-16	0.137127	1	1	1.71124e-12	2	rpl17
rps10	1.60525e-16	0.13005	1	1	1.88521e-12	2	rps10
rps25	2.44619e-16	0.167934	1	1	2.87281e-12	2	rps25
rps9	3.30562e-16	0.137213	1	1	3.88212e-12	2	rps9
rpl7	5.2655e-16	0.143015	1	1	6.1838e-12	2	rpl7
rpl35a	8.49027e-16	0.165732	1	1	9.97097e-12	2	rpl35a
rps71	1.34945e-15	0.141721	1	1	1.58479e-11	2	rps7
rpl9.1	1.45003e-15	0.135276	1	1	1.70291e-11	2	rpl9.1
rps24	2.18564e-15	0.130075	1	1	2.56682e-11	2	rps24
rpl241	2.83833e-15	0.131526	1	1	3.33334e-11	2	rpl24
RPS17	3.53282e-15	0.152416	1	1	4.14894e-11	2	RPS17
rps19	6.2646e-15	0.125635	1	1	7.35715e-11	2	rps19
rpl36a	6.82513e-15	0.15126	1	1	8.01543e-11	2	rpl36a
rpl32	8.9859e-15	0.128413	1	1	1.0553e-10	2	rpl32
rpl81	1.68499e-14	0.145917	1	1	1.97885e-10	2	rpl8
rps11	1.75492e-14	0.112882	1	1	2.06098e-10	2	rps11
rps61	4.07118e-14	0.149192	1	1	4.7812e-10	2	rps6
rps4x1	5.63311e-14	0.158618	1	1	6.61552e-10	2	rps4x
rps23	5.93118e-14	0.13604	1	1	6.96557e-10	2	rps23
rps26l1	8.15564e-14	0.153761	1	1	9.57799e-10	2	rps26l
rack1	1.20776e-13	0.156568	1	1	1.41839e-09	2	rack1
rpl28	1.82048e-13	0.113229	1	1	2.13798e-09	2	rpl28
si:dkey-151g10.6	3.29975e-13	0.152546	1	1	3.87522e-09	2	si:dkey-151g10.6
rpl211	4.7374e-13	0.113333	1	1	5.5636e-09	2	rpl21
rpl22	8.04402e-13	0.134209	1	1	9.4469e-09	2	rpl22
rpl10a1	8.09408e-13	0.134342	1	1	9.50569e-09	2	rpl10a
rpsa	9.51883e-13	0.128289	1	1	1.11789e-08	2	rpsa
rpl22l11	9.90433e-13	0.305241	1	0.955	1.16316e-08	2	rpl22l1
eef1g1	1.46349e-12	0.189095	1	1	1.71872e-08	2	eef1g
faua1	2.55896e-12	0.13065	1	1	3.00525e-08	2	faua
rplp01	3.38946e-12	0.148907	1	1	3.98059e-08	2	rplp0
RPL37A	7.16952e-12	0.14858	1	1	8.41989e-08	2	RPL37A
rpl10	9.6415e-12	0.102093	1	1	1.1323e-07	2	rpl10
rpl5b1	1.62686e-11	0.179563	1	0.993	1.91059e-07	2	rpl5b
rpl14	3.29579e-11	0.11252	1	1	3.87057e-07	2	rpl14
rplp1	3.57285e-11	0.136549	1	1	4.19595e-07	2	rplp1
rpl191	7.43707e-11	0.116976	1	1	8.7341e-07	2	rpl19
rpl13	8.00158e-11	0.110595	1	1	9.39706e-07	2	rpl13
rpl151	1.39868e-10	0.124066	1	1	1.64261e-06	2	rpl15
rps29	1.50643e-10	0.156011	1	1	1.76916e-06	2	rps29
rps28	3.86701e-10	0.157214	1	1	4.54141e-06	2	rps28
rpl36	4.26609e-10	0.139028	1	1	5.01009e-06	2	rpl36
nme2b.1	4.69423e-10	0.135674	1	1	5.51291e-06	2	nme2b.1
rpl34	5.36949e-10	0.144779	1	1	6.30593e-06	2	rpl34
rps3a1	7.81114e-10	0.108127	1	1	9.1734e-06	2	rps3a
rps21	1.60741e-09	0.153779	1	1	1.88774e-05	2	rps21
rps51	2.39002e-09	0.105893	1	1	2.80685e-05	2	rps5
rps22	3.39564e-09	0.114841	1	1	3.98784e-05	2	rps2
rpl37.1	4.56655e-09	0.13865	1	1	5.36296e-05	2	rpl37.1
rpl38	4.59868e-09	0.149878	1	1	5.40069e-05	2	rpl38
rpl39	4.71027e-09	0.126548	1	1	5.53174e-05	2	rpl39
rpl23a	3.68446e-08	0.101763	1	1	0.000432703	2	rpl23a
naca	5.35969e-08	0.103629	1	1	0.000629443	2	naca
eef1b2	5.69599e-08	0.186735	1	0.975	0.000668937	2	eef1b2
rsl24d11	6.59238e-08	0.143451	1	0.999	0.000774209	2	rsl24d1
rps18	8.85474e-08	0.122784	1	1	0.0010399	2	rps18
rpl5a1	1.93958e-07	0.151081	0.995	0.996	0.00227785	2	rpl5a
tpt11	6.34622e-07	0.119085	1	1	0.007453	2	tpt1
hsp90ab11	2.88222e-06	0.106565	1	1	0.0338488	2	hsp90ab1
gtpbp41	3.74006e-06	0.216266	0.94	0.855	0.0439233	2	gtpbp4
rpl41	2.2718e-05	0.140518	1	0.967	0.2668	2	rpl4
CT027638.1	0.000175824	0.527816	0.196	0.105	1	2	CT027638.1
ybx1	0.000176428	0.101895	1	0.993	1	2	ybx1
rplp2	0.000298894	0.101046	1	0.999	1	2	rplp2
eif3ha1	0.00116565	0.197266	0.804	0.682	1	2	eif3ha
si:ch73-160p18.3	0.00128057	0.40711	0.085	0.033	1	2	si:ch73-160p18.3
ppiaa	0.00140858	0.133594	0.97	0.921	1	2	ppiaa
eif3ea1	0.00242692	0.145987	0.879	0.805	1	2	eif3ea
nsa21	0.00319727	0.120335	0.97	0.964	1	2	nsa2
rps171	0.00409558	0.105359	0.99	0.965	1	2	rps17
ola1	0.00539333	0.192333	0.814	0.721	1	2	ola1
pnisr	0.00609002	0.132284	0.126	0.068	1	2	pnisr
rpl29	0.00904169	0.166121	0.95	0.939	1	2	rpl29
cyp11a1	0.00951212	0.374738	0.412	0.353	1	2	cyp11a1
eif3m	0.00972477	0.117742	0.905	0.866	1	2	eif3m

## Sheet: Sub-cluster 3
	p_val	avg_logFC	pct.1	pct.2	p_val_adj	cluster	gene
nid1b	1.08689e-83	1.37262	0.612	0.03	1.27645e-79	3	nid1b
cyp19a1a	2.86338e-67	2.89754	0.871	0.209	3.36275e-63	3	cyp19a1a
sparc	2.19823e-62	1.43079	0.759	0.129	2.58161e-58	3	sparc
si:ch211-222l21.1	1.59915e-57	1.46314	0.75	0.145	1.87804e-53	3	si:ch211-222l21.1
col1a1b	2.05464e-56	0.967361	0.517	0.043	2.41297e-52	3	col1a1b
tmem88b	8.12791e-53	0.881912	0.431	0.026	9.54541e-49	3	tmem88b
vwde	5.24539e-44	0.542249	0.397	0.03	6.16019e-40	3	vwde
emilin1a	8.99822e-39	0.430417	0.319	0.018	1.05675e-34	3	emilin1a
tnfrsf19	1.4763e-38	0.359659	0.371	0.031	1.73376e-34	3	tnfrsf19
mxra8a	1.96749e-38	0.872085	0.578	0.115	2.31062e-34	3	mxra8a
colec11	2.95715e-37	0.765657	0.328	0.023	3.47288e-33	3	colec11
col5a1	1.77929e-32	0.663527	0.388	0.048	2.0896e-28	3	col5a1
pmp22a	8.86055e-31	1.04511	0.853	0.489	1.04058e-26	3	pmp22a
podxl	1.13442e-30	0.737088	0.302	0.027	1.33226e-26	3	podxl
tnfaip6	8.31801e-29	0.618777	0.56	0.145	9.76867e-25	3	tnfaip6
fstl3	6.77801e-28	0.642264	0.276	0.025	7.9601e-24	3	fstl3
bsg	6.70133e-26	0.890826	0.569	0.164	7.87004e-22	3	bsg
CR751602.2	1.38248e-25	0.696901	0.302	0.037	1.62359e-21	3	CR751602.2
c6.1	1.64525e-25	0.48614	0.207	0.012	1.93218e-21	3	c6.1
nrp2b	4.45247e-25	0.263099	0.259	0.025	5.22898e-21	3	nrp2b
junba1	5.09047e-25	0.825247	0.966	0.852	5.97825e-21	3	junba
ngdn	1.28052e-24	0.602324	0.345	0.057	1.50384e-20	3	ngdn
slc29a1a	2.12783e-24	0.486115	0.293	0.037	2.49892e-20	3	slc29a1a
notum1b	3.28921e-24	0.366843	0.181	0.008	3.86285e-20	3	notum1b
dcn	6.96392e-24	0.256413	0.216	0.015	8.17842e-20	3	dcn
cd81a	2.63022e-23	0.771149	0.552	0.181	3.08892e-19	3	cd81a
col18a1a	3.94504e-23	0.947936	0.802	0.523	4.63305e-19	3	col18a1a
hsd11b2	2.47386e-22	0.488414	0.155	0.005	2.9053e-18	3	hsd11b2
socs3b	4.40773e-22	0.874059	0.353	0.068	5.17643e-18	3	socs3b
hsd3b7	4.76146e-22	0.484209	0.198	0.014	5.59186e-18	3	hsd3b7
aebp1	1.08897e-21	0.19832	0.207	0.017	1.27889e-17	3	aebp1
ybx11	1.71606e-21	0.35015	1	0.994	2.01535e-17	3	ybx1
jpt1b	3.83663e-21	0.635497	0.328	0.058	4.50574e-17	3	jpt1b
lxn	5.4665e-21	0.64707	0.336	0.065	6.41986e-17	3	lxn
higd1a	1.01952e-20	0.838326	0.672	0.338	1.19733e-16	3	higd1a
fibina	1.16798e-20	0.269784	0.25	0.031	1.37167e-16	3	fibina
zgc:162730	1.47869e-19	1.37325	0.353	0.08	1.73657e-15	3	zgc:162730
plpp1a	3.00517e-19	0.635673	0.25	0.036	3.52927e-15	3	plpp1a
ccnd2a	3.99162e-19	0.36006	0.233	0.03	4.68776e-15	3	ccnd2a
tbx2a	1.49529e-18	0.21847	0.164	0.012	1.75607e-14	3	tbx2a
ivns1abpb	1.84587e-18	0.552293	0.233	0.032	2.16779e-14	3	ivns1abpb
ndrg3a	3.13413e-18	0.450573	0.328	0.072	3.68072e-14	3	ndrg3a
tmem176	7.95486e-18	0.239469	0.19	0.019	9.34219e-14	3	tmem176
nrxn1a	8.92592e-18	0.293592	0.198	0.022	1.04826e-13	3	nrxn1a
calr	1.1782e-17	0.319336	0.319	0.068	1.38368e-13	3	calr
cct5	1.52718e-17	0.585404	0.491	0.16	1.79352e-13	3	cct5
cdh11	4.09604e-17	0.162118	0.138	0.008	4.81039e-13	3	cdh11
myl9b	1.889e-16	0.650486	0.431	0.141	2.21844e-12	3	myl9b
krt94	2.03308e-16	0.273513	0.121	0.005	2.38765e-12	3	krt94
cahz	2.4344e-16	0.386192	0.112	0.004	2.85897e-12	3	cahz
ism1	2.69866e-16	0.155201	0.112	0.004	3.16931e-12	3	ism1
sdc4	3.61827e-16	1.09689	0.603	0.328	4.24929e-12	3	sdc4
CABZ01030107.1	3.79288e-16	0.191306	0.103	0.003	4.45436e-12	3	CABZ01030107.1
wls	4.99498e-16	0.476907	0.293	0.065	5.8661e-12	3	wls
aoc2	1.27023e-15	0.489245	0.31	0.071	1.49176e-11	3	aoc2
magi1b	1.49077e-15	0.245547	0.302	0.067	1.75076e-11	3	magi1b
ywhabb	2.73429e-15	0.487834	0.319	0.083	3.21115e-11	3	ywhabb
cirbpb	3.18242e-15	0.615526	0.948	0.89	3.73744e-11	3	cirbpb
cadm4	4.82957e-15	0.310742	0.31	0.075	5.67185e-11	3	cadm4
cd248a	6.3167e-15	0.228658	0.155	0.015	7.41833e-11	3	cd248a
cep131	7.4945e-15	0.316784	0.31	0.077	8.80155e-11	3	cep131
col6a2	1.15293e-14	0.112655	0.086	0.001	1.354e-10	3	col6a2
mfap2	1.17223e-14	0.178306	0.086	0.001	1.37667e-10	3	mfap2
vegfd	2.38374e-14	0.171417	0.155	0.017	2.79946e-10	3	vegfd
hspe1	2.4597e-14	0.444174	0.983	0.95	2.88867e-10	3	hspe1
krt18b	6.06793e-14	0.230692	0.112	0.006	7.12618e-10	3	krt18b
hmgn6	6.99652e-14	0.586991	0.664	0.395	8.21671e-10	3	hmgn6
btbd6a	9.24093e-14	0.18882	0.164	0.021	1.08525e-09	3	btbd6a
col6a3	1.07906e-13	0.191967	0.103	0.005	1.26724e-09	3	col6a3
fstl1a	1.12349e-13	0.20742	0.216	0.039	1.31942e-09	3	fstl1a
mhc1zba	2.01481e-13	0.430935	0.862	0.695	2.36619e-09	3	mhc1zba
colec12	2.5963e-13	0.174245	0.181	0.027	3.0491e-09	3	colec12
nkd1	2.94095e-13	0.260093	0.241	0.052	3.45385e-09	3	nkd1
jam2b	2.96918e-13	0.205391	0.086	0.003	3.487e-09	3	jam2b
tfpia	4.33974e-13	0.291078	0.147	0.017	5.09659e-09	3	tfpia
fosab2	4.6887e-13	0.443552	0.991	0.951	5.50641e-09	3	fosab
il15	6.88304e-13	0.228257	0.121	0.01	8.08345e-09	3	il15
fabp3	7.23389e-13	0.514686	0.491	0.209	8.49548e-09	3	fabp3
b3gnt5a	8.92031e-13	0.270966	0.31	0.086	1.0476e-08	3	b3gnt5a
si:dkey-56m19.5	1.26693e-12	0.268808	0.19	0.032	1.48788e-08	3	si:dkey-56m19.5
olfml3b	1.32055e-12	0.162573	0.164	0.023	1.55085e-08	3	olfml3b
tcf12	2.7292e-12	0.578513	0.397	0.154	3.20518e-08	3	tcf12
marcksl1a	2.84557e-12	0.574854	0.259	0.063	3.34183e-08	3	marcksl1a
dkk3b	4.93813e-12	0.181621	0.086	0.004	5.79934e-08	3	dkk3b
pgrmc11	5.38691e-12	0.370253	1	0.973	6.32639e-08	3	pgrmc1
tmem98	5.39974e-12	0.101124	0.121	0.012	6.34146e-08	3	tmem98
adma	6.5471e-12	1.00281	0.595	0.342	7.68892e-08	3	adma
ppiaa1	1.27352e-11	0.320867	1	0.921	1.49562e-07	3	ppiaa
tmsb	1.54785e-11	0.234799	0.172	0.03	1.81779e-07	3	tmsb
fstl1b	1.69e-11	0.17221	0.147	0.021	1.98474e-07	3	fstl1b
wif1	1.93227e-11	0.182518	0.147	0.021	2.26926e-07	3	wif1
robo1	2.04402e-11	0.217514	0.216	0.048	2.4005e-07	3	robo1
axin2	2.41024e-11	0.324302	0.328	0.11	2.83059e-07	3	axin2
plpp3	5.18188e-11	0.117666	0.103	0.009	6.0856e-07	3	plpp3
cyp2p7	5.84516e-11	0.115176	0.086	0.005	6.86456e-07	3	cyp2p7
cd151	6.72431e-11	0.203974	0.129	0.017	7.89703e-07	3	cd151
hmgn2	7.22037e-11	1.77804	0.414	0.181	8.47961e-07	3	hmgn2
lsp1	7.8031e-11	0.117589	0.138	0.019	9.16396e-07	3	lsp1
mpp3a	9.77645e-11	0.127615	0.121	0.014	1.14815e-06	3	mpp3a
si:ch211-212k18.9	1.48578e-10	0.231566	0.276	0.083	1.7449e-06	3	si:ch211-212k18.9
col1a1a	1.52889e-10	0.260402	0.095	0.008	1.79553e-06	3	col1a1a
ewsr1a	1.55798e-10	0.189049	0.224	0.055	1.82969e-06	3	ewsr1a
tspan18b	1.59532e-10	0.15957	0.095	0.008	1.87354e-06	3	tspan18b
fabp11a	1.64762e-10	0.257883	0.095	0.008	1.93496e-06	3	fabp11a
sik2b	1.78002e-10	0.232534	0.233	0.061	2.09046e-06	3	sik2b
serbp1a	1.84817e-10	0.305817	0.991	0.917	2.17049e-06	3	serbp1a
lrpap1	1.88711e-10	0.169485	0.207	0.046	2.21622e-06	3	lrpap1
pim2	1.91475e-10	0.411196	0.259	0.076	2.24869e-06	3	pim2
tnfsf12	2.42915e-10	0.184474	0.138	0.021	2.8528e-06	3	tnfsf12
hmgn7	2.55641e-10	0.519465	0.56	0.308	3.00225e-06	3	hmgn7
flrt3	2.77697e-10	0.159185	0.129	0.018	3.26128e-06	3	flrt3
actb11	4.31671e-10	0.717687	0.733	0.6	5.06954e-06	3	actb1
mmp14a	4.61448e-10	0.392541	0.319	0.112	5.41925e-06	3	mmp14a
zeb1b	4.71205e-10	0.213349	0.267	0.08	5.53383e-06	3	zeb1b
hnrnpa0b	5.50685e-10	0.560083	0.5	0.268	6.46725e-06	3	hnrnpa0b
2020-06-02	6.57439e-10	0.340765	0.991	0.959	7.72097e-06	3	jun
nr0b1	7.19052e-10	0.221493	0.241	0.065	8.44455e-06	3	nr0b1
add3b	1.16841e-09	0.129986	0.121	0.017	1.37218e-05	3	add3b
antxr2a	1.18467e-09	0.260334	0.284	0.095	1.39128e-05	3	antxr2a
ntd5	1.19197e-09	0.116459	0.078	0.005	1.39985e-05	3	ntd5
add3a	1.25709e-09	0.348378	0.328	0.12	1.47632e-05	3	add3a
smo	1.73951e-09	0.304949	0.448	0.208	2.04288e-05	3	smo
cdon	1.74058e-09	0.431437	0.724	0.563	2.04414e-05	3	cdon
cox6a1	2.70589e-09	0.450675	0.319	0.12	3.1778e-05	3	cox6a1
pabpc1a	2.72936e-09	0.290854	0.931	0.898	3.20535e-05	3	pabpc1a
xbp1	3.00493e-09	0.580545	0.534	0.32	3.52899e-05	3	xbp1
il4r.1.1	3.26213e-09	0.136501	0.198	0.049	3.83104e-05	3	il4r.1.1
seta	3.54258e-09	0.383942	0.293	0.102	4.16041e-05	3	seta
nop10	3.64673e-09	0.425409	0.328	0.128	4.28272e-05	3	nop10
hspd1	4.0206e-09	0.460256	0.879	0.821	4.72179e-05	3	hspd1
egfra	4.2274e-09	0.199451	0.164	0.035	4.96466e-05	3	egfra
mcm6	4.29739e-09	0.136319	0.103	0.013	5.04685e-05	3	mcm6
gstp1	5.96344e-09	0.502948	0.474	0.232	7.00347e-05	3	gstp1
CR848833.1	6.09211e-09	0.128724	0.129	0.022	7.15458e-05	3	CR848833.1
txn	6.7212e-09	0.259272	0.224	0.065	7.89338e-05	3	txn
ran	7.57771e-09	0.479706	0.707	0.592	8.89926e-05	3	ran
jag1b	9.67209e-09	0.317042	0.534	0.297	0.000113589	3	jag1b
cxcl12a	1.2531e-08	0.427456	0.086	0.009	0.000147164	3	cxcl12a
prdx1	1.29141e-08	0.215346	0.112	0.017	0.000151663	3	prdx1
ndufaf2	1.66261e-08	0.115118	0.095	0.012	0.000195257	3	ndufaf2
eva1ba	1.71855e-08	0.140184	0.181	0.045	0.000201826	3	eva1ba
fzd2	1.8234e-08	0.279543	0.31	0.123	0.00021414	3	fzd2
hspa81	1.90371e-08	0.495354	0.75	0.612	0.000223572	3	hspa8
lin7a	2.77605e-08	0.172493	0.241	0.077	0.00032602	3	lin7a
calr3b	2.86876e-08	0.245168	0.25	0.085	0.000336907	3	calr3b
prmt1	2.9602e-08	0.367376	0.207	0.061	0.000347646	3	prmt1
h2afvb	3.87849e-08	0.69494	0.216	0.067	0.00045549	3	h2afvb
si:dkey-23i12.7	4.89406e-08	0.144971	0.078	0.008	0.000574759	3	si:dkey-23i12.7
khdrbs1a	4.97327e-08	0.51503	0.534	0.339	0.000584061	3	khdrbs1a
tspan7	5.00483e-08	0.245547	0.155	0.036	0.000587767	3	tspan7
svild	5.0772e-08	0.254007	0.147	0.032	0.000596266	3	svild
anxa1a	5.23558e-08	0.218143	0.095	0.013	0.000614867	3	anxa1a
vdac2	5.83894e-08	0.382977	0.664	0.495	0.000685725	3	vdac2
cldn5a	5.9029e-08	0.236938	0.25	0.086	0.000693237	3	cldn5a
zgc:152791	6.68505e-08	0.422007	0.319	0.126	0.000785092	3	zgc:152791
tmsb4x	6.73915e-08	0.719	0.586	0.432	0.000791446	3	tmsb4x
prmt5	7.28817e-08	0.107513	0.06	0.004	0.000855922	3	prmt5
tmem258	8.04175e-08	0.366101	0.284	0.112	0.000944423	3	tmem258
si:ch211-212k18.8	8.78335e-08	0.171901	0.198	0.058	0.00103152	3	si:ch211-212k18.8
rnd3a	8.80099e-08	0.121187	0.129	0.026	0.00103359	3	rnd3a
lrrc17	9.18291e-08	0.101267	0.129	0.026	0.00107844	3	lrrc17
atf4b1	9.94324e-08	0.484289	0.69	0.601	0.00116773	3	atf4b
plxna3	1.01463e-07	0.133203	0.164	0.041	0.00119158	3	plxna3
pabpn1	1.01947e-07	0.345599	0.397	0.19	0.00119727	3	pabpn1
f3b	1.11072e-07	0.941461	0.448	0.257	0.00130443	3	f3b
maff	1.25511e-07	0.261664	0.414	0.206	0.001474	3	maff
mych	1.40667e-07	0.15314	0.103	0.017	0.00165199	3	mych
fbl	1.69093e-07	0.305601	0.19	0.055	0.00198583	3	fbl
mt-nd6	1.92368e-07	0.122328	0.147	0.035	0.00225916	3	mt-nd6
hspb11	2.05221e-07	0.812592	0.276	0.103	0.00241011	3	hspb1
hmgb2b	2.52711e-07	0.634966	0.267	0.105	0.00296783	3	hmgb2b
hmgb1a	2.53808e-07	0.582113	0.5	0.32	0.00298072	3	hmgb1a
npm1a	2.72121e-07	0.536115	0.371	0.19	0.00319579	3	npm1a
pdgfra	2.77623e-07	0.279364	0.155	0.04	0.0032604	3	pdgfra
zgc:195173	3.19393e-07	0.114948	0.121	0.025	0.00375095	3	zgc:195173
cyp1b11	3.4972e-07	0.321974	0.405	0.2	0.00410711	3	cyp1b1
si:dkey-192g7.3	3.62119e-07	0.161776	0.138	0.032	0.00425272	3	si:dkey-192g7.3
eef1b21	3.73761e-07	0.196601	0.991	0.979	0.00438945	3	eef1b2
stag2b	3.76314e-07	0.184729	0.267	0.103	0.00441943	3	stag2b
snrpg	4.17325e-07	0.21362	0.112	0.022	0.00490106	3	snrpg
ergic2	4.19789e-07	0.151861	0.198	0.062	0.00493	3	ergic2
zgc:113054	4.27816e-07	0.150377	0.155	0.04	0.00502427	3	zgc:113054
aifm2	4.50112e-07	0.139488	0.207	0.067	0.00528611	3	aifm2
pcolceb	5.1685e-07	0.135258	0.06	0.005	0.00606988	3	pcolceb
polr2f	5.98523e-07	0.22414	0.19	0.059	0.00702905	3	polr2f
f10	6.70839e-07	0.139185	0.138	0.034	0.00787833	3	f10
eif1b1	6.84134e-07	0.363405	0.862	0.77	0.00803447	3	eif1b
man2a2	7.04666e-07	0.174245	0.103	0.019	0.0082756	3	man2a2
arl4ab	7.46259e-07	0.128258	0.129	0.03	0.00876406	3	arl4ab
cbr1l	9.78997e-07	0.219305	0.147	0.039	0.0114973	3	cbr1l
snrpe	9.89751e-07	0.226103	0.112	0.023	0.0116236	3	snrpe
pleca	1.14002e-06	0.303121	0.353	0.175	0.0133884	3	pleca
tuba1b	1.20055e-06	0.122551	0.095	0.017	0.0140992	3	tuba1b
tcp1	1.28051e-06	0.354585	0.414	0.225	0.0150384	3	tcp1
caap1	1.31378e-06	0.134053	0.164	0.048	0.0154291	3	caap1
itga9	1.35267e-06	0.242153	0.31	0.138	0.0158857	3	itga9
cavin2b	1.41744e-06	0.286161	0.129	0.032	0.0166464	3	cavin2b
nid2a	1.44461e-06	0.122781	0.052	0.004	0.0169656	3	nid2a
gas1a	1.50479e-06	0.322014	0.517	0.335	0.0176722	3	gas1a
krt15	1.55357e-06	0.438385	0.052	0.004	0.0182451	3	krt15
cebpb	1.57163e-06	0.777638	0.259	0.111	0.0184573	3	cebpb
clic4	1.59905e-06	0.180457	0.19	0.061	0.0187792	3	clic4
itm2bb1	1.67529e-06	0.402275	0.5	0.305	0.0196745	3	itm2bb
ptmab	1.76675e-06	0.680186	0.552	0.404	0.0207487	3	ptmab
zranb2	1.8724e-06	0.257852	0.138	0.037	0.0219894	3	zranb2
si:ch1073-392o20.2	1.98638e-06	0.122439	0.112	0.025	0.023328	3	si:ch1073-392o20.2
nop58	2.043e-06	0.293803	0.302	0.135	0.023993	3	nop58
sox4a.1	2.06241e-06	0.230116	0.112	0.025	0.024221	3	sox4a.1
abl2	2.16496e-06	0.141663	0.138	0.036	0.0254253	3	abl2
eef2b1	2.44701e-06	0.154392	1	0.994	0.0287377	3	eef2b
cxcl18b1	2.46264e-06	0.478731	0.31	0.138	0.0289212	3	cxcl18b
pomp	2.46329e-06	0.311341	0.241	0.098	0.0289289	3	pomp
boc	2.49962e-06	0.117439	0.121	0.028	0.0293555	3	boc
snrpb	2.5067e-06	0.435045	0.216	0.083	0.0294387	3	snrpb
hnrnpa0l.1	2.56755e-06	0.533958	0.509	0.361	0.0301533	3	hnrnpa0l.1
si:ch211-214j24.10	2.91699e-06	0.259444	0.216	0.08	0.0342572	3	si:ch211-214j24.10
ntmt1	2.97977e-06	0.156993	0.19	0.065	0.0349945	3	ntmt1
tcf3b	2.99518e-06	0.157297	0.241	0.095	0.0351754	3	tcf3b
dad1	3.0496e-06	0.370863	0.207	0.076	0.0358145	3	dad1
zgc:174863	3.13604e-06	0.234876	0.241	0.095	0.0368296	3	zgc:174863
si:ch211-133n4.4	3.31639e-06	0.148288	0.207	0.075	0.0389477	3	si:ch211-133n4.4
psip1b	3.6706e-06	0.162739	0.19	0.063	0.0431075	3	psip1b
socs3a1	3.89186e-06	0.580746	0.707	0.569	0.045706	3	socs3a
mycb1	4.14311e-06	0.424034	0.879	0.693	0.0486567	3	mycb
nanos1	4.31039e-06	0.111308	0.086	0.015	0.0506212	3	nanos1
psma1	4.43184e-06	0.319688	0.414	0.23	0.0520476	3	psma1
si:dkey-7j14.6	4.81108e-06	0.449949	0.526	0.387	0.0565013	3	si:dkey-7j14.6
znf609b	6.13549e-06	0.204051	0.267	0.117	0.0720552	3	znf609b
slc29a4	6.23549e-06	0.285473	0.31	0.155	0.0732296	3	slc29a4
fosl1a1	7.18914e-06	0.511602	0.422	0.266	0.0844292	3	fosl1a
rnf2	7.75376e-06	0.177917	0.155	0.048	0.0910601	3	rnf2
marcksl1b	8.43272e-06	0.101973	0.095	0.019	0.0990338	3	marcksl1b
ccn2a	8.46039e-06	0.249596	0.052	0.005	0.0993589	3	ccn2a
cux1a	8.87809e-06	0.3263	0.466	0.289	0.104264	3	cux1a
eif4ebp3	9.01636e-06	0.484323	0.629	0.532	0.105888	3	eif4ebp3
serpinh1b	9.22842e-06	0.660557	0.19	0.071	0.108379	3	serpinh1b
pwp2h	9.37648e-06	0.11949	0.164	0.053	0.110117	3	pwp2h
zeb2b	9.42931e-06	0.123338	0.147	0.044	0.110738	3	zeb2b
eif6	9.75809e-06	0.228295	0.198	0.075	0.114599	3	eif6
odf2a	9.82654e-06	0.116129	0.138	0.04	0.115403	3	odf2a
zgc:162698	1.01619e-05	0.125403	0.181	0.063	0.119341	3	zgc:162698
dnajc15	1.02185e-05	0.133674	0.181	0.063	0.120006	3	dnajc15
h3f3b.1	1.09838e-05	0.353893	0.586	0.457	0.128993	3	h3f3b.1
ddx39ab	1.10586e-05	0.282759	0.121	0.032	0.129872	3	ddx39ab
psma8	1.1538e-05	0.30608	0.336	0.177	0.135503	3	psma8
met	1.15449e-05	0.168802	0.259	0.114	0.135583	3	met
CR383676.11	1.23158e-05	0.132153	1	1	0.144637	3	CR383676.1
sec22ba	1.23612e-05	0.145254	0.181	0.065	0.14517	3	sec22ba
ddx23	1.25235e-05	0.112391	0.138	0.04	0.147075	3	ddx23
fam171a2a	1.2588e-05	0.114786	0.164	0.054	0.147833	3	fam171a2a
ms4a17a.5	1.30706e-05	0.208767	0.362	0.194	0.153501	3	ms4a17a.5
calr3a	1.3293e-05	0.213573	0.164	0.055	0.156113	3	calr3a
nkain1	1.33085e-05	0.134642	0.112	0.028	0.156295	3	nkain1
glo1	1.34505e-05	0.227204	0.181	0.066	0.157963	3	glo1
gadd45ab1	1.44403e-05	0.356899	0.276	0.132	0.169587	3	gadd45ab
arhgef18a	1.44694e-05	0.14236	0.207	0.08	0.169928	3	arhgef18a
fam168a	1.45011e-05	0.207597	0.302	0.15	0.1703	3	fam168a
si:ch1073-459j12.1	1.47924e-05	0.150686	0.155	0.052	0.173722	3	si:ch1073-459j12.1
ccbe1	1.5262e-05	0.158563	0.164	0.055	0.179237	3	ccbe1
col5a2a	1.52782e-05	0.104972	0.078	0.014	0.179427	3	col5a2a
canx	1.55286e-05	0.226499	0.138	0.043	0.182367	3	canx
prickle1b	1.66749e-05	0.171901	0.164	0.057	0.19583	3	prickle1b
si:dkey-67c22.2	1.77896e-05	0.198389	0.224	0.092	0.208921	3	si:dkey-67c22.2
lsm4	1.78073e-05	0.172052	0.155	0.05	0.209129	3	lsm4
alyref	1.7949e-05	0.295437	0.129	0.037	0.210793	3	alyref
txndc12	1.84612e-05	0.210362	0.259	0.121	0.216809	3	txndc12
ier3ip1	1.89047e-05	0.138728	0.129	0.037	0.222017	3	ier3ip1
ch25hl3	1.89647e-05	0.212138	0.112	0.03	0.222722	3	ch25hl3
vdac1	1.90464e-05	0.253824	0.241	0.106	0.223681	3	vdac1
jam3b	1.94333e-05	0.138906	0.259	0.116	0.228225	3	jam3b
si:ch211-197h24.9	2.12814e-05	0.354672	0.31	0.163	0.249929	3	si:ch211-197h24.9
ppp1r10	2.15926e-05	0.158563	0.121	0.034	0.253583	3	ppp1r10
kdelr2b	2.17565e-05	0.197462	0.155	0.052	0.255508	3	kdelr2b
si:dkeyp-120h9.1	2.23659e-05	0.124442	0.164	0.057	0.262665	3	si:dkeyp-120h9.1
daam1a	2.24879e-05	0.175811	0.198	0.076	0.264098	3	daam1a
hmgb3a	2.30324e-05	0.266628	0.517	0.357	0.270493	3	hmgb3a
ppiab	2.45157e-05	0.230869	0.905	0.843	0.287913	3	ppiab
cish	2.58386e-05	0.146353	0.103	0.026	0.303449	3	cish
gclm	3.07384e-05	0.24456	0.328	0.169	0.360992	3	gclm
ncl	3.09977e-05	0.394144	0.422	0.266	0.364038	3	ncl
ddx51	3.25162e-05	0.3914	0.31	0.168	0.38187	3	ddx5
ip6k2a	3.26158e-05	0.101314	0.129	0.039	0.38304	3	ip6k2a
col12a1b	3.33916e-05	0.144988	0.19	0.074	0.392151	3	col12a1b
ppp1r1b	3.33916e-05	0.144988	0.19	0.074	0.392151	3	ppp1r1b
tmem176l.1	3.59762e-05	0.33776	0.534	0.388	0.422505	3	tmem176l.1
ptbp1a	3.63557e-05	0.200223	0.19	0.075	0.426961	3	ptbp1a
btg22	3.82503e-05	0.344259	0.905	0.898	0.449212	3	btg2
phb2b	4.0728e-05	0.114839	0.138	0.044	0.47831	3	phb2b
nat8l	4.08112e-05	0.151725	0.207	0.083	0.479286	3	nat8l
h3f3b.1.1	4.11843e-05	0.358405	0.534	0.406	0.483669	3	h3f3b.1.1
hdlbpa	4.21555e-05	0.183443	0.147	0.049	0.495075	3	hdlbpa
cxxc5a	4.7545e-05	0.165044	0.267	0.129	0.558368	3	cxxc5a
antxr1c	4.90279e-05	0.232397	0.129	0.041	0.575783	3	antxr1c
kctd5a	5.23242e-05	0.174023	0.233	0.103	0.614495	3	kctd5a
osr2	5.44637e-05	0.24536	0.897	0.834	0.639622	3	osr2
sec63	5.47713e-05	0.132515	0.069	0.013	0.643234	3	sec63
micu2	5.86252e-05	0.157441	0.25	0.117	0.688494	3	micu2
setb	6.32876e-05	0.302175	0.25	0.12	0.743249	3	setb
igf2bp2b	6.34038e-05	0.118285	0.172	0.066	0.744615	3	igf2bp2b
si:ch211-288g17.3	6.6e-05	0.416587	0.216	0.097	0.775104	3	si:ch211-288g17.3
zgc:110626	7.4276e-05	0.120417	0.198	0.083	0.872298	3	zgc:110626
hnrnpaba	8.33121e-05	0.443245	0.302	0.175	0.978417	3	hnrnpaba
atp5mc1	8.44235e-05	0.391714	0.216	0.103	0.99147	3	atp5mc1
her61	8.61493e-05	0.73028	0.336	0.195	1	3	her6
rpl291	8.89478e-05	0.174955	0.983	0.935	1	3	rpl29
zswim5	9.34808e-05	0.144123	0.259	0.125	1	3	zswim5
krtcap2	9.76019e-05	0.211785	0.207	0.09	1	3	krtcap2
pdzrn3b	0.000100526	0.140929	0.155	0.058	1	3	pdzrn3b
uqcrb	0.000102652	0.305926	0.319	0.183	1	3	uqcrb
nop2	0.000105134	0.137854	0.147	0.052	1	3	nop2
grhl1	0.00010617	0.123224	0.147	0.053	1	3	grhl1
mcl1b	0.000106691	0.282214	0.19	0.081	1	3	mcl1b
cplx2l	0.000109044	0.152738	0.172	0.068	1	3	cplx2l
im:7152348	0.000126019	0.1975	0.138	0.048	1	3	im:7152348
vat1	0.000127641	0.181102	0.103	0.03	1	3	vat1
leng1	0.000135317	0.112186	0.19	0.079	1	3	leng1
BX569787.1	0.000136039	0.144418	0.069	0.014	1	3	BX569787.1
hnrnpl2	0.000141657	0.185414	0.112	0.035	1	3	hnrnpl2
mmp14b	0.000142858	0.191839	0.302	0.165	1	3	mmp14b
rbm28	0.000157901	0.118839	0.19	0.077	1	3	rbm28
nucks1a	0.000169892	0.324603	0.241	0.123	1	3	nucks1a
efcc1	0.000176754	0.166191	0.233	0.114	1	3	efcc1
ctnnb1	0.000181206	0.238022	0.198	0.09	1	3	ctnnb1
asah1b	0.000188941	0.150949	0.19	0.083	1	3	asah1b
med28	0.000189517	0.15613	0.103	0.031	1	3	med28
si:dkey-183j2.10	0.00019464	0.105047	0.121	0.04	1	3	si:dkey-183j2.10
cx47.1	0.000219716	0.136087	0.121	0.04	1	3	cx47.1
nudc	0.000225731	0.134246	0.095	0.027	1	3	nudc
eif1axb	0.000231756	0.233554	0.241	0.117	1	3	eif1axb
si:ch73-1a9.3	0.000238842	0.509623	0.69	0.695	1	3	si:ch73-1a9.3
etf1b	0.000243617	0.268593	0.181	0.081	1	3	etf1b
znf330	0.000245652	0.114893	0.112	0.036	1	3	znf330
epas1b	0.000257217	0.220905	0.44	0.294	1	3	epas1b
2020-09-10	0.000261686	0.139418	0.078	0.019	1	3	2020-09-10
STMP1	0.000262787	0.241568	0.216	0.103	1	3	STMP1
hibadhb	0.000264525	0.106289	0.112	0.036	1	3	hibadhb
cmtm3	0.000276667	0.114839	0.138	0.052	1	3	cmtm3
gna12a	0.000280509	0.178741	0.233	0.116	1	3	gna12a
dclk1a	0.000282492	0.234876	0.276	0.152	1	3	dclk1a
cox15	0.000298497	0.102551	0.086	0.023	1	3	cox15
slc38a5b	0.000300476	0.207177	0.276	0.143	1	3	slc38a5b
stard13b	0.000332333	0.200814	0.31	0.181	1	3	stard13b
ubc	0.000337543	0.409115	0.578	0.489	1	3	ubc
smim15	0.000354123	0.133016	0.095	0.028	1	3	smim15
sirt5	0.00036034	0.141646	0.216	0.105	1	3	sirt5
si:ch211-51e12.7	0.00036391	0.174128	0.121	0.043	1	3	si:ch211-51e12.7
si:ch73-46j18.5	0.000367775	0.27715	0.371	0.232	1	3	si:ch73-46j18.5
acaa2	0.000375329	0.13818	0.19	0.085	1	3	acaa2
cox5ab	0.000401109	0.239716	0.224	0.115	1	3	cox5ab
znf385b	0.000418396	0.106298	0.147	0.058	1	3	znf385b
calm1a	0.000418695	0.267318	0.276	0.152	1	3	calm1a
rbx1	0.000429729	0.244471	0.207	0.101	1	3	rbx1
tomm20b	0.000456016	0.272395	0.336	0.204	1	3	tomm20b
map1lc3b	0.000469576	0.143472	0.181	0.08	1	3	map1lc3b
rps19bp1	0.000475283	0.117293	0.086	0.025	1	3	rps19bp1
snrpf	0.000480318	0.26774	0.233	0.123	1	3	snrpf
snrpd2	0.00049544	0.215121	0.164	0.071	1	3	snrpd2
myef2	0.000515185	0.113705	0.078	0.021	1	3	myef2
creg2	0.000537267	0.185422	0.302	0.181	1	3	creg2
si:dkeyp-113d7.1	0.000561017	0.161858	0.276	0.151	1	3	si:dkeyp-113d7.1
rerea	0.000565107	0.10874	0.129	0.049	1	3	rerea
bmp2b	0.000580725	0.102513	0.095	0.03	1	3	bmp2b
b2m1	0.000592382	0.170785	0.94	0.902	1	3	b2m
ndufab1a	0.000608208	0.168007	0.181	0.083	1	3	ndufab1a
pik3c2a	0.000610915	0.119237	0.181	0.083	1	3	pik3c2a
zbtb20	0.000649624	0.173685	0.302	0.169	1	3	zbtb20
akap12b	0.000679088	0.237131	0.164	0.074	1	3	akap12b
psma3	0.000724526	0.262551	0.233	0.126	1	3	psma3
dynll1	0.000735824	0.234929	0.086	0.026	1	3	dynll1
cbx4	0.000761947	0.15034	0.276	0.154	1	3	cbx4
nsfl1c	0.000764266	0.102437	0.052	0.01	1	3	nsfl1c
wu:fi42e03	0.000774404	0.169239	0.052	0.01	1	3	wu:fi42e03
mxi1	0.000784107	0.163541	0.216	0.11	1	3	mxi1
klf11a	0.000796233	0.107513	0.207	0.099	1	3	klf11a
hint1	0.000851012	0.261275	0.319	0.199	1	3	hint1
tomm6	0.000852216	0.177411	0.164	0.074	1	3	tomm6
npm3	0.000904682	0.159047	0.112	0.041	1	3	npm3
egr2a1	0.000911331	0.635531	0.362	0.262	1	3	egr2a
s100a10b	0.000915804	0.216584	0.06	0.014	1	3	s100a10b
igfbp1a1	0.000934512	0.597298	0.621	0.517	1	3	igfbp1a
psmd7	0.000935676	0.116003	0.095	0.031	1	3	psmd7
eif4a1a	0.000975926	0.23336	0.164	0.075	1	3	eif4a1a
sh3bgrl	0.00105401	0.100396	0.181	0.085	1	3	sh3bgrl
crtap	0.00110039	0.116625	0.224	0.116	1	3	crtap
cbx5	0.00111081	0.174524	0.181	0.086	1	3	cbx5
srsf3b	0.00116175	0.21678	0.267	0.151	1	3	srsf3b
dkc1	0.00117586	0.17359	0.172	0.081	1	3	dkc1
c1qbp	0.00121121	0.252695	0.224	0.123	1	3	c1qbp
cnot3b	0.00129784	0.119237	0.181	0.088	1	3	cnot3b
ppa1b	0.00130688	0.111224	0.078	0.023	1	3	ppa1b
eif5b	0.00131992	0.200604	0.164	0.076	1	3	eif5b
denr	0.0014052	0.195648	0.164	0.077	1	3	denr
elovl1b	0.00141069	0.148575	0.112	0.043	1	3	elovl1b
hnrnpabb	0.00147156	0.335772	0.198	0.102	1	3	hnrnpabb
tomm20a	0.00152796	0.23641	0.103	0.039	1	3	tomm20a
phc2a	0.00157632	0.154494	0.052	0.012	1	3	phc2a
rcc2	0.00160111	0.139949	0.086	0.028	1	3	rcc2
chd6	0.00162373	0.124981	0.25	0.138	1	3	chd6
sat1a.2	0.00164362	0.497474	0.328	0.208	1	3	sat1a.2
zgc:171750	0.00171813	0.134443	0.052	0.012	1	3	zgc:171750
rab5if	0.00172458	0.116003	0.086	0.028	1	3	rab5if
tspan9b	0.00175713	0.100396	0.172	0.083	1	3	tspan9b
tcta	0.00179294	0.107513	0.147	0.066	1	3	tcta
neo1a	0.00181893	0.134458	0.293	0.177	1	3	neo1a
ptk7a	0.00191813	0.118133	0.172	0.084	1	3	ptk7a
bmp4	0.00193616	0.11784	0.198	0.102	1	3	bmp4
ext2	0.00207695	0.133577	0.207	0.111	1	3	ext2
lims1	0.00213384	0.10634	0.164	0.077	1	3	lims1
pde7a	0.00215378	0.107513	0.181	0.088	1	3	pde7a
psma5	0.00217309	0.180332	0.155	0.074	1	3	psma5
atp5f1b	0.002417	0.332805	0.517	0.423	1	3	atp5f1b
glud1a	0.00245459	0.118442	0.095	0.035	1	3	glud1a
clta	0.00249487	0.155304	0.129	0.057	1	3	clta
uggt1	0.00250041	0.109914	0.147	0.068	1	3	uggt1
si:ch211-199g17.2	0.00263133	0.2341	0.138	0.065	1	3	si:ch211-199g17.2
fkbp14	0.00265792	0.120238	0.19	0.099	1	3	fkbp14
cope	0.00267367	0.120508	0.112	0.045	1	3	cope
ppib	0.00277065	0.236525	0.638	0.586	1	3	ppib
hmgb1b	0.00288814	0.345243	0.405	0.307	1	3	hmgb1b
mapk12a	0.00306296	0.127992	0.198	0.107	1	3	mapk12a
sec61b	0.00315456	0.183351	0.198	0.105	1	3	sec61b
mtus1b	0.00315668	0.122459	0.431	0.302	1	3	mtus1b
spcs1	0.00317445	0.166134	0.181	0.094	1	3	spcs1
pdia6	0.0032251	0.202179	0.103	0.041	1	3	pdia6
fgfrl1a	0.00328776	0.182892	0.422	0.312	1	3	fgfrl1a
spry2	0.00338479	0.118687	0.052	0.013	1	3	spry2
srcap	0.0034992	0.105152	0.164	0.081	1	3	srcap
mydgf	0.00383293	0.111016	0.172	0.089	1	3	mydgf
atrx	0.00391166	0.244787	0.284	0.183	1	3	atrx
vcp	0.00409818	0.154853	0.147	0.07	1	3	vcp
phf14	0.00440218	0.102958	0.216	0.121	1	3	phf14
hnrnpa0a	0.00442054	0.150926	0.147	0.071	1	3	hnrnpa0a
sinhcaf	0.00442592	0.105323	0.25	0.147	1	3	sinhcaf
tmed2	0.00447345	0.207597	0.216	0.125	1	3	tmed2
mid1ip1l	0.00473957	0.190263	0.06	0.018	1	3	mid1ip1l
si:ch73-380l3.4	0.00475074	0.103998	0.172	0.089	1	3	si:ch73-380l3.4
snu13b	0.00481854	0.137854	0.078	0.027	1	3	snu13b
rbm8a	0.0049561	0.224974	0.276	0.179	1	3	rbm8a
ddx39aa	0.0051803	0.127526	0.103	0.043	1	3	ddx39aa
znf703	0.00529306	0.10988	0.155	0.079	1	3	znf703
clu	0.00536631	0.112577	0.052	0.014	1	3	clu
rwdd1	0.00543939	0.131284	0.138	0.066	1	3	rwdd1
mcm2	0.0056006	0.103761	0.052	0.014	1	3	mcm2
cdh21	0.00563272	0.18005	0.379	0.254	1	3	cdh2
cmpk	0.00567472	0.141866	0.147	0.072	1	3	cmpk
sumo2b	0.0057018	0.240361	0.302	0.2	1	3	sumo2b
polr2k	0.0058556	0.138728	0.086	0.034	1	3	polr2k
alas1	0.00585986	0.303546	0.276	0.177	1	3	alas1
eif2s1a	0.0059043	0.102551	0.069	0.023	1	3	eif2s1a
atf7ip	0.00596204	0.107513	0.147	0.071	1	3	atf7ip
serf2	0.0059977	0.229654	0.578	0.51	1	3	serf2
elof1	0.00608112	0.126712	0.138	0.066	1	3	elof1
csnk1a1	0.00613552	0.23511	0.345	0.244	1	3	csnk1a1
rbmx	0.00637474	0.160506	0.138	0.068	1	3	rbmx
ccnl1a	0.00647858	0.134686	0.121	0.055	1	3	ccnl1a
abcf1	0.00654129	0.118363	0.086	0.034	1	3	abcf1
zgc:91910	0.00657266	0.179401	0.216	0.128	1	3	zgc:91910
laptm4b	0.00659596	0.109831	0.181	0.099	1	3	laptm4b
fubp1	0.00667787	0.163898	0.121	0.057	1	3	fubp1
TXN	0.00687051	0.222995	0.578	0.538	1	3	TXN
mgst3b	0.00691552	0.204292	0.569	0.517	1	3	mgst3b
TST	0.00694044	0.108671	0.164	0.086	1	3	TST
ost4	0.00697201	0.12842	0.112	0.05	1	3	ost4
psmb7	0.00705328	0.167945	0.172	0.094	1	3	psmb7
dbi	0.00742399	0.115648	0.112	0.05	1	3	dbi
ppp2r2d	0.00759647	0.110992	0.172	0.093	1	3	ppp2r2d
ndufc2	0.00762387	0.198773	0.267	0.177	1	3	ndufc2
cct3	0.00766885	0.219631	0.336	0.235	1	3	cct3
dhrs13l1	0.007792	0.108688	0.155	0.081	1	3	dhrs13l1
ms4a17a.8	0.00785251	0.130503	0.216	0.129	1	3	ms4a17a.8
hmga1a	0.00793795	0.2618	0.198	0.115	1	3	hmga1a
tomm7	0.008047	0.158363	0.164	0.088	1	3	tomm7
vbp1	0.00807386	0.13904	0.095	0.04	1	3	vbp1
ccdc25	0.00809437	0.14076	0.241	0.15	1	3	ccdc25
phf20b	0.00822171	0.148756	0.293	0.201	1	3	phf20b
phf5a	0.00824347	0.12902	0.086	0.035	1	3	phf5a
ace	0.00836828	0.105201	0.172	0.093	1	3	ace
naa10	0.00840434	0.204559	0.198	0.119	1	3	naa10
taf11	0.00843301	0.112391	0.078	0.03	1	3	taf11
ska2	0.00845061	0.10628	0.069	0.025	1	3	ska2
uri1	0.00856319	0.108731	0.086	0.035	1	3	uri1
srsf1a	0.0086149	0.13488	0.086	0.035	1	3	srsf1a
spcs3	0.00863037	0.143406	0.155	0.081	1	3	spcs3
col27a1b	0.00870485	0.100396	0.155	0.083	1	3	col27a1b
erh	0.00928993	0.20019	0.172	0.095	1	3	erh
srsf7a	0.00934643	0.196641	0.147	0.077	1	3	srsf7a
zp2.5	0.00942851	0.229069	0.052	0.015	1	3	zp2.5
ifi46	0.00949231	0.293518	0.345	0.245	1	3	ifi46
ifi301	0.00956795	0.138013	0.19	0.108	1	3	ifi30

## Sheet: Sub-cluster 4
	p_val	avg_logFC	pct.1	pct.2	p_val_adj	cluster	gene
pnp4a	2.06368e-182	2.16715	0.933	0	2.42358e-178	4	pnp4a
hsd17b1	4.86759e-173	1.43167	1	0.002	5.7165e-169	4	hsd17b1
notch3	3.33009e-163	1.79146	1	0.003	3.91086e-159	4	notch3
sb:cb81	2.80546e-143	0.659246	0.733	0	3.29474e-139	4	sb:cb81
slit2	2.81245e-143	0.757686	0.733	0	3.30295e-139	4	slit2
cdh1	2.0343e-140	1.48304	1	0.007	2.38908e-136	4	cdh1
myl9a	1.60152e-137	1.13641	0.867	0.003	1.88083e-133	4	myl9a
nrarpa	3.35766e-134	1.11831	0.8	0.002	3.94324e-130	4	nrarpa
bmpr2a	2.28277e-127	0.838207	0.933	0.007	2.68089e-123	4	bmpr2a
phlda2	2.08496e-125	2.38429	0.8	0.003	2.44858e-121	4	phlda2
htra1b	3.19571e-125	0.87205	0.8	0.003	3.75305e-121	4	htra1b
eya2	3.60516e-121	0.621874	0.733	0.002	4.2339e-117	4	eya2
smoc2	2.52896e-117	0.693147	0.6	0	2.97001e-113	4	smoc2
si:dkey-31f5.11	1.28498e-112	0.689728	0.733	0.003	1.50908e-108	4	si:dkey-31f5.11
emx2	2.85153e-105	0.75313	0.6	0.001	3.34884e-101	4	emx2
her2	2.18979e-104	1.58241	0.533	0	2.57169e-100	4	her2
si:dkey-225k4.1	2.18979e-104	0.725937	0.533	0	2.57169e-100	4	si:dkey-225k4.1
rbp5	2.19274e-104	0.929536	0.533	0	2.57516e-100	4	rbp5
cad	7.51531e-103	1.32982	0.933	0.013	8.82598e-99	4	cad
slc8a4b	3.936e-100	0.584368	0.667	0.003	4.62244e-96	4	slc8a4b
bambia	4.50047e-98	0.990791	0.733	0.006	5.28535e-94	4	bambia
gmnn	5.53804e-96	1.21695	0.6	0.002	6.50387e-92	4	gmnn
sept9a	1.08928e-92	0.723657	0.533	0.001	1.27925e-88	4	sept9a
sulf2b	1.7868e-91	0.81831	0.467	0	2.09842e-87	4	sulf2b
slc7a10a	1.78734e-91	0.659246	0.467	0	2.09905e-87	4	slc7a10a
wnt4a	1.78774e-91	0.725937	0.467	0	2.09952e-87	4	wnt4a
gstt1b	1.37956e-89	1.16567	0.8	0.01	1.62015e-85	4	gstt1b
col4a5	4.74041e-86	1.29802	0.933	0.018	5.56714e-82	4	col4a5
lamb2l	2.00503e-83	0.467723	0.533	0.002	2.35471e-79	4	lamb2l
ano5b	2.20848e-81	0.617328	0.667	0.007	2.59364e-77	4	ano5b
nhsl2	4.6454e-80	0.548905	0.467	0.001	5.45556e-76	4	nhsl2
cyp2x12.1	1.37601e-78	0.382992	0.4	0	1.61599e-74	4	cyp2x12.1
si:ch73-217n20.1	1.37601e-78	0.382992	0.4	0	1.61599e-74	4	si:ch73-217n20.1
rerglb	1.37694e-78	0.427444	0.4	0	1.61707e-74	4	rerglb
slc7a11	1.37694e-78	0.427444	0.4	0	1.61707e-74	4	slc7a11
plekhg4	6.4268e-78	0.981832	0.8	0.014	7.54764e-74	4	plekhg4
srpra	1.84568e-73	1.11197	1	0.029	2.16757e-69	4	srpra
marcksl1b1	3.28165e-72	1.91661	0.8	0.016	3.85397e-68	4	marcksl1b
si:dkey-73n10.1	4.13893e-71	0.722518	0.467	0.002	4.86076e-67	4	si:dkey-73n10.1
COLEC10	4.83931e-71	0.65469	0.467	0.002	5.68329e-67	4	COLEC10
trib3	8.15973e-71	0.685188	0.467	0.002	9.58279e-67	4	trib3
bcam	4.33247e-69	0.713458	0.533	0.005	5.08806e-65	4	bcam
gmps	9.90716e-69	1.30339	0.933	0.027	1.1635e-64	4	gmps
rdh8a	2.371e-67	0.381851	0.4	0.001	2.7845e-63	4	rdh8a
dap1b	1.49311e-66	2.24598	1	0.035	1.75351e-62	4	dap1b
notch1b	1.00704e-65	0.336472	0.333	0	1.18267e-61	4	notch1b
her4.2.1	1.00765e-65	0.510826	0.333	0	1.18338e-61	4	her4.2.1
gsdf	1.97119e-65	2.70993	1	0.037	2.31497e-61	4	gsdf
slit3	5.66612e-64	0.421752	0.533	0.006	6.65429e-60	4	slit3
metrn	6.78162e-64	0.665008	0.667	0.011	7.96433e-60	4	metrn
slc43a3b	9.36512e-64	0.610549	0.533	0.006	1.09984e-59	4	slc43a3b
hs3st3b1b	1.15778e-63	0.578696	0.467	0.003	1.35969e-59	4	hs3st3b1b
ccdc3a	6.39676e-59	0.425164	0.4	0.002	7.51236e-55	4	ccdc3a
efna1b	7.08408e-59	0.507407	0.4	0.002	8.31954e-55	4	efna1b
tmsb1	9.1436e-59	0.634442	0.533	0.007	1.07382e-54	4	tmsb1
si:ch211-156j16.1	1.21501e-57	0.608299	0.467	0.005	1.42691e-53	4	si:ch211-156j16.1
ivns1abpa	3.93338e-57	1.95022	1	0.046	4.61936e-53	4	ivns1abpa
smad1	5.4226e-55	0.49722	0.6	0.011	6.3683e-51	4	smad1
si:busm1-57f23.1	8.11447e-55	0.548905	0.333	0.001	9.52963e-51	4	si:busm1-57f23.1
fbln5	2.03796e-52	0.810351	0.4	0.003	2.39338e-48	4	fbln5
hey2	2.32884e-52	0.465448	0.4	0.003	2.73499e-48	4	hey2
limch1b	2.65483e-52	0.333053	0.4	0.003	3.11784e-48	4	limch1b
col4a6	5.55324e-49	0.736228	0.533	0.01	6.52172e-45	4	col4a6
tagln2	7.42225e-47	0.422888	0.333	0.002	8.7167e-43	4	tagln2
ponzr1	1.11111e-46	1.62637	1	0.056	1.30489e-42	4	ponzr1
fxyd6l	2.57617e-45	1.25245	0.667	0.022	3.02546e-41	4	fxyd6l
impdh1b	2.73533e-45	0.487136	0.533	0.011	3.21237e-41	4	impdh1b
glulb	7.31538e-44	2.31281	1	0.065	8.59119e-40	4	glulb
ramp2	6.85699e-43	0.421752	0.4	0.006	8.05285e-39	4	ramp2
slc35f2	8.54115e-43	0.646767	0.4	0.006	1.00307e-38	4	slc35f2
timp2b	8.54115e-43	0.420618	0.4	0.006	1.00307e-38	4	timp2b
foxp4	9.09272e-43	0.711206	0.467	0.009	1.06785e-38	4	foxp4
ptprfb	1.49858e-42	0.676169	0.467	0.009	1.75994e-38	4	ptprfb
ppargc1b	1.86122e-42	0.64339	0.467	0.009	2.18581e-38	4	ppargc1b
zgc:194839	2.11997e-42	0.335331	0.267	0.001	2.48969e-38	4	zgc:194839
her4.2	2.12007e-42	0.468863	0.267	0.001	2.48981e-38	4	her4.2
enpp6	2.23625e-42	0.286541	0.267	0.001	2.62625e-38	4	enpp6
ptn	2.35831e-42	0.235248	0.267	0.001	2.7696e-38	4	ptn
frmd4bb	2.35831e-42	0.235248	0.267	0.001	2.7696e-38	4	frmd4bb
si:ch211-250c4.4	2.61687e-42	0.414965	0.467	0.009	3.07325e-38	4	si:ch211-250c4.4
sult1st6	2.92341e-42	0.234108	0.267	0.001	3.43325e-38	4	sult1st6
chka	3.28435e-41	1.01069	0.667	0.025	3.85714e-37	4	chka
rgcc	4.06829e-41	0.837076	0.333	0.003	4.7778e-37	4	rgcc
hpgd	6.71417e-41	0.571931	0.333	0.003	7.88512e-37	4	hpgd
CU861453.1	9.95927e-40	0.414965	0.467	0.01	1.16962e-35	4	CU861453.1
dag1	1.55244e-39	1.17904	0.8	0.041	1.82319e-35	4	dag1
ston2	3.84209e-39	0.329646	0.4	0.007	4.51214e-35	4	ston2
wnt9b	1.28106e-36	0.378436	0.333	0.005	1.50447e-32	4	wnt9b
sdk1a	1.48527e-36	0.378436	0.333	0.005	1.74431e-32	4	sdk1a
si:dkey-194e6.1	1.79054e-36	0.419485	0.333	0.005	2.10281e-32	4	si:dkey-194e6.1
uck2a	3.05398e-36	0.860403	0.6	0.023	3.5866e-32	4	uck2a
serpinh1a	8.50216e-36	0.450783	0.533	0.017	9.98494e-32	4	serpinh1a
tspan18a	2.08654e-35	0.380712	0.267	0.002	2.45044e-31	4	tspan18a
si:ch211-137i24.10	2.28057e-35	0.285402	0.267	0.002	2.6783e-31	4	si:ch211-137i24.10
tnika	2.98067e-35	0.331916	0.267	0.002	3.5005e-31	4	tnika
hprt1	5.69855e-33	0.558538	0.467	0.014	6.69238e-29	4	hprt1
atp1a1a.1	7.8553e-33	1.26605	0.667	0.034	9.22527e-29	4	atp1a1a.1
angptl4	7.89433e-33	1.3675	0.6	0.026	9.2711e-29	4	angptl4
pnp5a1	1.87376e-32	0.868643	0.6	0.026	2.20054e-28	4	pnp5a
pdgfra1	3.05442e-32	1.22486	0.733	0.043	3.58711e-28	4	pdgfra
nrp2a	4.53596e-31	0.54861	0.667	0.035	5.32703e-27	4	nrp2a
klhl41b	2.62198e-30	0.23297	0.267	0.003	3.07925e-26	4	klhl41b
tmem204	3.05532e-30	0.231833	0.267	0.003	3.58817e-26	4	tmem204
celsr1a	7.82643e-30	0.280856	0.333	0.007	9.19136e-26	4	celsr1a
sort1a	2.48731e-29	0.600503	0.733	0.047	2.9211e-25	4	sort1a
zmp:0000000711	2.74021e-29	0.4452	0.533	0.023	3.2181e-25	4	zmp:0000000711
krt18a.11	5.41621e-29	1.2675	1	0.091	6.3608e-25	4	krt18a.1
slc7a3a	1.98484e-28	0.660757	0.667	0.039	2.33099e-24	4	slc7a3a
zfhx3	1.99998e-27	0.589378	0.467	0.018	2.34877e-23	4	zfhx3
cygb1	2.2167e-27	0.530826	0.333	0.008	2.60329e-23	4	cygb1
si:ch73-193i22.1	1.35267e-26	0.283126	0.267	0.005	1.58857e-22	4	si:ch73-193i22.1
gstt1a	1.35267e-26	0.283126	0.267	0.005	1.58857e-22	4	gstt1a
btr16	1.54471e-26	0.231833	0.267	0.005	1.81411e-22	4	btr16
insig1	1.82641e-26	0.278591	0.267	0.005	2.14494e-22	4	insig1
lama51	4.19538e-26	0.85849	0.8	0.064	4.92705e-22	4	lama5
znf536	1.09039e-25	0.669248	0.733	0.054	1.28055e-21	4	znf536
marcksl1a1	2.30981e-25	1.11562	0.867	0.075	2.71264e-21	4	marcksl1a
zgc:123010	8.29914e-25	0.478257	0.533	0.029	9.74651e-21	4	zgc:123010
ampd2b	1.63645e-24	0.320617	0.4	0.015	1.92184e-20	4	ampd2b
phkg1a	2.91499e-24	0.234108	0.2	0.002	3.42336e-20	4	phkg1a
zgc:92275	2.91499e-24	0.234108	0.2	0.002	3.42336e-20	4	zgc:92275
adarb1a	2.91499e-24	0.234108	0.2	0.002	3.42336e-20	4	adarb1a
lmbrd2a	3.15756e-24	0.180041	0.2	0.002	3.70824e-20	4	lmbrd2a
tuft1a	3.15756e-24	0.180041	0.2	0.002	3.70824e-20	4	tuft1a
slc7a2	3.15756e-24	0.180041	0.2	0.002	3.70824e-20	4	slc7a2
kidins220a1	7.82055e-24	0.632254	0.6	0.039	9.18445e-20	4	kidins220a
appa1	1.03286e-23	1.32022	1	0.137	1.21299e-19	4	appa
atad2	1.49821e-23	0.229563	0.267	0.006	1.75949e-19	4	atad2
cyth1a.1	2.21247e-23	0.368261	0.333	0.01	2.59832e-19	4	cyth1a.1
gnl3	3.13936e-23	0.382794	0.533	0.03	3.68686e-19	4	gnl3
aif1l	1.08108e-22	0.558974	0.533	0.031	1.26962e-18	4	aif1l
egfra1	4.19182e-22	0.526893	0.6	0.042	4.92288e-18	4	egfra
sos1	4.39051e-22	0.316133	0.4	0.017	5.15622e-18	4	sos1
enc1	5.20661e-22	0.514086	0.6	0.041	6.11464e-18	4	enc1
tpm4a	1.397e-21	0.667194	0.533	0.033	1.64064e-17	4	tpm4a
tp53i11b	2.16975e-21	0.329646	0.267	0.007	2.54815e-17	4	tp53i11b
myh10	2.6643e-21	0.389366	0.467	0.025	3.12895e-17	4	myh10
id3	2.90815e-21	0.89723	0.6	0.045	3.41533e-17	4	id3
antxr1c1	6.89037e-21	0.624007	0.6	0.043	8.09206e-17	4	antxr1c
fndc3ba	7.21076e-21	0.418824	0.6	0.045	8.46831e-17	4	fndc3ba
polr1c	2.27091e-20	0.319494	0.333	0.013	2.66695e-16	4	polr1c
ccdc80	2.64918e-20	0.23297	0.2	0.003	3.11119e-16	4	ccdc80
hey1	2.64918e-20	0.23297	0.2	0.003	3.11119e-16	4	hey1
igf2b	2.64918e-20	0.23297	0.2	0.003	3.11119e-16	4	igf2b
gmds	2.64995e-20	0.463178	0.2	0.003	3.1121e-16	4	gmds
kank4	2.71468e-20	0.362653	0.4	0.019	3.18812e-16	4	kank4
znf1137.1	2.92698e-20	0.178903	0.2	0.003	3.43745e-16	4	znf1137.1
trpm6	2.92698e-20	0.178903	0.2	0.003	3.43745e-16	4	trpm6
abca1b	2.92698e-20	0.178903	0.2	0.003	3.43745e-16	4	abca1b
ptk2aa	2.92698e-20	0.178903	0.2	0.003	3.43745e-16	4	ptk2aa
arhgef1a	2.92698e-20	0.178903	0.2	0.003	3.43745e-16	4	arhgef1a
itga2.3	2.92698e-20	0.178903	0.2	0.003	3.43745e-16	4	itga2.3
smad2	1.29825e-19	0.449932	0.533	0.037	1.52467e-15	4	smad2
dock9b	2.39412e-19	0.325121	0.267	0.008	2.81165e-15	4	dock9b
cavin2b1	2.57036e-19	0.463701	0.533	0.037	3.01863e-15	4	cavin2b
akap12b1	2.66524e-19	0.822772	0.733	0.074	3.13006e-15	4	akap12b
fbxo25	5.44017e-19	0.312782	0.333	0.014	6.38894e-15	4	fbxo25
f101	7.63376e-19	0.41774	0.533	0.039	8.96509e-15	4	f10
tspan31	1.54839e-18	0.444576	0.667	0.064	1.81843e-14	4	tspan31
vasnb	1.63508e-18	0.313898	0.4	0.022	1.92024e-14	4	vasnb
jam2a	5.91908e-18	0.328565	0.4	0.022	6.95136e-14	4	jam2a
slc12a2	6.57879e-18	0.341622	0.467	0.031	7.72613e-14	4	slc12a2
col12a1a	7.60346e-18	0.500604	0.267	0.009	8.9295e-14	4	col12a1a
lpar1	8.81776e-18	0.312782	0.4	0.023	1.03556e-13	4	lpar1
ADGRL3	9.80362e-18	0.350423	0.467	0.032	1.15134e-13	4	ADGRL3
zgc:1748631	1.44142e-17	1.03217	0.8	0.103	1.69281e-13	4	zgc:174863
myo1ea	1.96238e-17	0.230697	0.2	0.005	2.30462e-13	4	myo1ea
BX511111.3	2.01814e-17	0.177766	0.2	0.005	2.37011e-13	4	BX511111.3
si:ch211-268b14.2	2.19864e-17	0.17663	0.2	0.005	2.58208e-13	4	si:ch211-268b14.2
greb1	3.13142e-17	0.580257	0.533	0.043	3.67753e-13	4	greb1
gdpd5b	1.79032e-16	0.310555	0.4	0.025	2.10255e-12	4	gdpd5b
tln1	2.06736e-16	0.650614	0.6	0.059	2.42791e-12	4	tln1
rhbdf1a	2.0947e-16	0.276331	0.267	0.01	2.46002e-12	4	rhbdf1a
tanc1b	2.72608e-16	0.22391	0.267	0.01	3.2015e-12	4	tanc1b
si:ch211-114c12.2	2.95817e-16	0.317252	0.267	0.01	3.47408e-12	4	si:ch211-114c12.2
rrp15	4.08466e-16	0.217168	0.267	0.01	4.79702e-12	4	rrp15
eif4ebp3l	4.34857e-16	0.404823	0.467	0.034	5.10696e-12	4	eif4ebp3l
si:ch211-200p22.4	5.23864e-16	0.495619	0.533	0.049	6.15226e-12	4	si:ch211-200p22.4
man1b1b	6.90919e-16	0.309444	0.4	0.026	8.11415e-12	4	man1b1b
rmdn1	7.18423e-16	0.333985	0.467	0.035	8.43716e-12	4	rmdn1
gstm.1	8.52192e-16	0.843236	0.8	0.107	1.00081e-11	4	gstm.1
foxo1a	1.59849e-15	0.378436	0.4	0.026	1.87727e-11	4	foxo1a
foxp1a	1.87744e-15	0.331813	0.4	0.026	2.20486e-11	4	foxp1a
nrarpb	2.73838e-15	0.17663	0.2	0.006	3.21596e-11	4	nrarpb
chrna1	2.73838e-15	0.17663	0.2	0.006	3.21596e-11	4	chrna1
cblc	2.73838e-15	0.17663	0.2	0.006	3.21596e-11	4	cblc
tgfb5	2.73838e-15	0.17663	0.2	0.006	3.21596e-11	4	tgfb5
wtip	2.73838e-15	0.17663	0.2	0.006	3.21596e-11	4	wtip
asap2a	2.95103e-15	0.175496	0.2	0.006	3.46569e-11	4	asap2a
ddx31	3.34051e-15	0.272951	0.267	0.011	3.9231e-11	4	ddx31
xrcc1	3.42555e-15	0.170971	0.2	0.006	4.02296e-11	4	xrcc1
plekhj1	3.72612e-15	0.380613	0.4	0.027	4.37596e-11	4	plekhj1
pmp22b	4.03354e-15	0.355964	0.267	0.011	4.73699e-11	4	pmp22b
ppfibp1b	5.0241e-15	0.343815	0.467	0.039	5.90031e-11	4	ppfibp1b
rras	5.04808e-15	0.476346	0.467	0.038	5.92846e-11	4	rras
fam13b	5.33966e-15	0.294008	0.4	0.027	6.27089e-11	4	fam13b
rpia	6.33888e-15	0.462422	0.6	0.061	7.44438e-11	4	rpia
dbi1	7.41017e-15	0.590187	0.533	0.05	8.7025e-11	4	dbi
ackr4b	7.50692e-15	0.620919	0.533	0.051	8.81613e-11	4	ackr4b
gnl3l	8.87494e-15	0.311668	0.333	0.019	1.04227e-10	4	gnl3l
cmasa	1.0778e-14	0.430827	0.333	0.019	1.26577e-10	4	cmasa
cxcl14	1.08208e-14	0.719478	0.467	0.04	1.2708e-10	4	cxcl14
itm2bb2	2.53122e-14	1.56179	1	0.318	2.97266e-10	4	itm2bb
si:dkey-12j5.1	2.56781e-14	0.327484	0.467	0.04	3.01563e-10	4	si:dkey-12j5.1
yes1	5.23073e-14	0.263992	0.267	0.013	6.14296e-10	4	yes1
hgfa	5.50049e-14	0.122883	0.133	0.002	6.45977e-10	4	hgfa
pygo2	6.31721e-14	0.306116	0.4	0.031	7.41893e-10	4	pygo2
prpsap2	6.76862e-14	0.343815	0.333	0.021	7.94906e-10	4	prpsap2
rftn2	7.83552e-14	0.302799	0.4	0.031	9.20203e-10	4	rftn2
ptp4a2b1	1.149e-13	0.439762	0.8	0.111	1.34939e-09	4	ptp4a2b
pld1a	1.24974e-13	0.313898	0.333	0.022	1.46769e-09	4	pld1a
atp2b1a	1.25683e-13	0.322867	0.2	0.007	1.47602e-09	4	atp2b1a
cd74a	1.57021e-13	1.10178	0.6	0.071	1.84406e-09	4	cd74a
mcm5	1.60074e-13	0.266224	0.2	0.007	1.87991e-09	4	mcm5
si:ch211-76m11.8	1.61628e-13	0.265108	0.333	0.022	1.89815e-09	4	si:ch211-76m11.8
surf1	1.63609e-13	0.169843	0.2	0.007	1.92142e-09	4	surf1
ccnl1a1	1.94311e-13	0.384706	0.533	0.056	2.28199e-09	4	ccnl1a
mycn	2.68946e-13	0.222783	0.267	0.014	3.15851e-09	4	mycn
rps6ka1	2.69397e-13	0.270704	0.267	0.014	3.1638e-09	4	rps6ka1
brd3a	3.54131e-13	0.295102	0.333	0.022	4.15891e-09	4	brd3a
gas6	3.54132e-13	0.294008	0.333	0.022	4.15892e-09	4	gas6
sars	3.70318e-13	0.431837	0.467	0.043	4.34902e-09	4	sars
hgh1	3.73457e-13	0.217168	0.267	0.014	4.38588e-09	4	hgh1
si:dkey-42i9.6	4.03698e-13	0.329646	0.4	0.032	4.74103e-09	4	si:dkey-42i9.6
epb41l5	4.53717e-13	0.261765	0.267	0.014	5.32845e-09	4	epb41l5
cs	4.56164e-13	0.392071	0.467	0.043	5.35719e-09	4	cs
slc39a13	5.51421e-13	0.20714	0.267	0.014	6.47589e-09	4	slc39a13
cldn12	8.24338e-13	0.330729	0.4	0.033	9.68102e-09	4	cldn12
nfybb	1.15083e-12	0.362264	0.467	0.046	1.35153e-08	4	nfybb
ppp6c	1.16032e-12	0.352684	0.467	0.045	1.36268e-08	4	ppp6c
med10	1.77817e-12	0.387856	0.467	0.046	2.08828e-08	4	med10
MTERF4	2.0877e-12	0.217168	0.267	0.015	2.45179e-08	4	MTERF4
frmd6	2.35627e-12	0.380613	0.4	0.035	2.76721e-08	4	frmd6
trmt112	2.37316e-12	0.365477	0.4	0.034	2.78704e-08	4	trmt112
robo11	2.54514e-12	0.350568	0.533	0.062	2.98902e-08	4	robo1
si:dkey-240h12.3	2.6935e-12	0.174362	0.2	0.008	3.16325e-08	4	si:dkey-240h12.3
nxn	2.6935e-12	0.174362	0.2	0.008	3.16325e-08	4	nxn
fscn1a	2.7968e-12	0.413416	0.333	0.024	3.28457e-08	4	fscn1a
snx5	2.82501e-12	0.298394	0.4	0.035	3.3177e-08	4	snx5
uhrf1	2.85881e-12	0.173231	0.2	0.008	3.35739e-08	4	uhrf1
rbm14a	3.01291e-12	0.20714	0.267	0.015	3.53836e-08	4	rbm14a
psmd10	3.22001e-12	0.358188	0.2	0.008	3.78158e-08	4	psmd10
vapal	3.2623e-12	0.316743	0.4	0.034	3.83124e-08	4	vapal
org	3.34959e-12	0.600503	0.2	0.008	3.93376e-08	4	org
prps1a	3.54521e-12	0.477407	0.4	0.035	4.16349e-08	4	prps1a
rgl1	5.43877e-12	0.298394	0.4	0.037	6.38729e-08	4	rgl1
CABZ01068358.1	5.69706e-12	0.762486	0.733	0.115	6.69063e-08	4	CABZ01068358.1
psap	8.02774e-12	0.863554	0.733	0.123	9.42777e-08	4	psap
tmem79b	8.10457e-12	0.220533	0.267	0.016	9.51801e-08	4	tmem79b
sema4ab	8.10457e-12	0.220533	0.267	0.016	9.51801e-08	4	sema4ab
waca	8.342e-12	0.379524	0.333	0.025	9.79685e-08	4	waca
si:ch73-22o12.1	9.34809e-12	0.322099	0.467	0.05	1.09784e-07	4	si:ch73-22o12.1
tmem106ba	9.46178e-12	0.287465	0.4	0.037	1.11119e-07	4	tmem106ba
basp1	1.00898e-11	0.348216	0.267	0.016	1.18495e-07	4	basp1
oaz1a1	1.07509e-11	1.30703	1	0.373	1.26258e-07	4	oaz1a
tmem131	1.20785e-11	0.289641	0.333	0.025	1.4185e-07	4	tmem131
ak1	1.3651e-11	0.20825	0.267	0.016	1.60318e-07	4	ak1
CTBP1	1.37611e-11	0.331813	0.4	0.038	1.61611e-07	4	CTBP1
cemip2	1.44013e-11	0.261765	0.333	0.026	1.69129e-07	4	cemip2
slc38a5b1	1.4962e-11	0.71784	0.8	0.15	1.75714e-07	4	slc38a5b
slc4a2a	1.5269e-11	0.260653	0.333	0.026	1.79319e-07	4	slc4a2a
klf3	1.53731e-11	0.35693	0.533	0.067	1.80542e-07	4	klf3
tpd52l2a	1.54403e-11	0.291822	0.4	0.038	1.81331e-07	4	tpd52l2a
zgc:63882	2.07879e-11	0.286378	0.4	0.038	2.44133e-07	4	zgc:63882
si:dkey-51d8.6	2.54504e-11	0.121744	0.133	0.003	2.9889e-07	4	si:dkey-51d8.6
si:dkey-238k10.2	2.54504e-11	0.121744	0.133	0.003	2.9889e-07	4	si:dkey-238k10.2
bbox1	2.54504e-11	0.121744	0.133	0.003	2.9889e-07	4	bbox1
il21r.1	2.54504e-11	0.121744	0.133	0.003	2.9889e-07	4	il21r.1
bmpr2b	2.54504e-11	0.121744	0.133	0.003	2.9889e-07	4	bmpr2b
slc50a1	2.54504e-11	0.121744	0.133	0.003	2.9889e-07	4	slc50a1
CU655820.1	2.54504e-11	0.121744	0.133	0.003	2.9889e-07	4	CU655820.1
zgc:114081	2.54504e-11	0.121744	0.133	0.003	2.9889e-07	4	zgc:114081
dhrs3a	2.54504e-11	0.121744	0.133	0.003	2.9889e-07	4	dhrs3a
abtb2b	2.54504e-11	0.121744	0.133	0.003	2.9889e-07	4	abtb2b
crip2	2.54551e-11	0.175496	0.133	0.003	2.98945e-07	4	crip2
serpinb1	2.58974e-11	0.455359	0.467	0.051	3.04139e-07	4	serpinb1
brf2	2.6142e-11	0.17663	0.133	0.003	3.07012e-07	4	brf2
gramd4a	2.68458e-11	0.120607	0.133	0.003	3.15277e-07	4	gramd4a
ly6m3	2.68458e-11	0.120607	0.133	0.003	3.15277e-07	4	ly6m3
CKS2	2.68483e-11	0.174362	0.133	0.003	3.15306e-07	4	CKS2
zgc:175135.2	2.75697e-11	0.175496	0.133	0.003	3.23779e-07	4	zgc:175135.2
usp14	2.83144e-11	0.119472	0.133	0.003	3.32524e-07	4	usp14
ppp1r9alb	3.20735e-11	0.225038	0.2	0.009	3.76671e-07	4	ppp1r9alb
mcm3	3.20787e-11	0.322867	0.2	0.009	3.76732e-07	4	mcm3
aldoaa	3.41108e-11	0.834972	1	0.236	4.00597e-07	4	aldoaa
cip2a	3.5066e-11	0.1721	0.2	0.009	4.11815e-07	4	cip2a
uxs1	3.80163e-11	0.302799	0.333	0.027	4.46463e-07	4	uxs1
rhoq	3.90533e-11	0.169843	0.2	0.009	4.58642e-07	4	rhoq
pdia2	3.90595e-11	0.267342	0.2	0.009	4.58715e-07	4	pdia2
amd1	4.12139e-11	0.218289	0.2	0.009	4.84016e-07	4	amd1
amh	4.19286e-11	0.348216	0.267	0.017	4.9241e-07	4	amh
cldn11b	4.43501e-11	0.386074	0.4	0.041	5.20848e-07	4	cldn11b
dus2	4.58593e-11	0.166466	0.2	0.009	5.38571e-07	4	dus2
sparc1	4.84371e-11	0.866197	0.933	0.199	5.68845e-07	4	sparc
naa15a	5.14195e-11	0.298394	0.267	0.017	6.03871e-07	4	naa15a
si:dkeyp-121d4.3	5.26422e-11	0.365477	0.467	0.055	6.1823e-07	4	si:dkeyp-121d4.3
scaf4b	5.43082e-11	0.328565	0.467	0.055	6.37795e-07	4	scaf4b
ppp1cb	5.82431e-11	0.571786	0.6	0.089	6.84007e-07	4	ppp1cb
map7d1a	6.10351e-11	0.326405	0.467	0.055	7.16797e-07	4	map7d1a
gstm.2	6.6418e-11	0.314608	0.467	0.054	7.80013e-07	4	gstm.2
ghra	8.12265e-11	0.296198	0.4	0.041	9.53924e-07	4	ghra
luzp1	9.1759e-11	0.300594	0.333	0.029	1.07762e-06	4	luzp1
wsb1	9.80576e-11	0.424682	0.533	0.068	1.15159e-06	4	wsb1
got2b	1.03269e-10	0.441376	0.4	0.041	1.21279e-06	4	got2b
elf2b	1.61188e-10	0.212699	0.267	0.018	1.89299e-06	4	elf2b
fundc1	1.74315e-10	0.286378	0.333	0.029	2.04715e-06	4	fundc1
clic41	1.75406e-10	0.348675	0.533	0.07	2.05997e-06	4	clic4
rpz51	2.25089e-10	1.03806	0.733	0.15	2.64345e-06	4	rpz5
stmn1a	2.69561e-10	0.352684	0.267	0.018	3.16573e-06	4	stmn1a
vwa1	2.70493e-10	0.1721	0.2	0.01	3.17667e-06	4	vwa1
cldn11a1	2.91294e-10	1.22729	0.933	0.281	3.42095e-06	4	cldn11a
fxyd1	2.98682e-10	0.220533	0.2	0.01	3.50772e-06	4	fxyd1
ccdc1871	3.02513e-10	0.710164	0.733	0.143	3.55271e-06	4	ccdc187
mcm4	3.18828e-10	0.263992	0.2	0.01	3.74432e-06	4	mcm4
phldb2b	3.45948e-10	0.163101	0.2	0.01	4.06282e-06	4	phldb2b
pik3ip1	3.56023e-10	0.436772	0.733	0.126	4.18113e-06	4	pik3ip1
myl12.11	3.83107e-10	0.717054	0.933	0.224	4.49921e-06	4	myl12.1
mgat4b	4.42508e-10	0.214931	0.267	0.019	5.19681e-06	4	mgat4b
swap70b	5.39612e-10	0.256219	0.267	0.019	6.3372e-06	4	swap70b
snrpb1	5.80521e-10	0.591806	0.6	0.091	6.81764e-06	4	snrpb
slc38a2	7.51924e-10	0.422388	0.4	0.045	8.83059e-06	4	slc38a2
atrx1	8.34211e-10	0.614483	0.867	0.185	9.79697e-06	4	atrx
FP102018.1	9.63201e-10	0.254009	0.333	0.032	1.13118e-05	4	FP102018.1
znf395b	1.04277e-09	0.381566	0.4	0.045	1.22463e-05	4	znf395b
fkbp1b	1.06272e-09	0.251804	0.333	0.032	1.24806e-05	4	fkbp1b
mapk14a	1.17752e-09	0.270223	0.333	0.031	1.38288e-05	4	mapk14a
hipk2	1.23057e-09	0.249604	0.333	0.032	1.44518e-05	4	hipk2
selenof	1.25375e-09	0.511968	0.8	0.161	1.47241e-05	4	selenof
mgat2	1.29193e-09	0.248505	0.333	0.032	1.51724e-05	4	mgat2
si:ch211-246m6.5	1.48017e-09	0.17663	0.133	0.005	1.73831e-05	4	si:ch211-246m6.5
slc38a4	1.49624e-09	0.283126	0.333	0.032	1.75719e-05	4	slc38a4
adgrg1.1	1.5469e-09	0.120607	0.133	0.005	1.81668e-05	4	adgrg1.1
ciz1a	1.5469e-09	0.120607	0.133	0.005	1.81668e-05	4	ciz1a
si:dkey-68o6.6	1.5469e-09	0.120607	0.133	0.005	1.81668e-05	4	si:dkey-68o6.6
ackr3b	1.5469e-09	0.120607	0.133	0.005	1.81668e-05	4	ackr3b
asb5b	1.5469e-09	0.120607	0.133	0.005	1.81668e-05	4	asb5b
zgc:165656	1.5469e-09	0.120607	0.133	0.005	1.81668e-05	4	zgc:165656
cx30.3	1.5469e-09	0.120607	0.133	0.005	1.81668e-05	4	cx30.3
gypc	1.5469e-09	0.120607	0.133	0.005	1.81668e-05	4	gypc
sorbs3	1.5469e-09	0.120607	0.133	0.005	1.81668e-05	4	sorbs3
syne1b	1.5469e-09	0.120607	0.133	0.005	1.81668e-05	4	syne1b
prss23	1.5469e-09	0.120607	0.133	0.005	1.81668e-05	4	prss23
col16a1	1.5469e-09	0.120607	0.133	0.005	1.81668e-05	4	col16a1
zgc:85858	1.5469e-09	0.120607	0.133	0.005	1.81668e-05	4	zgc:85858
AL844518.1	1.5469e-09	0.120607	0.133	0.005	1.81668e-05	4	AL844518.1
ccdc120	1.5469e-09	0.120607	0.133	0.005	1.81668e-05	4	ccdc120
mak	1.5469e-09	0.120607	0.133	0.005	1.81668e-05	4	mak
CR381618.1	1.5469e-09	0.120607	0.133	0.005	1.81668e-05	4	CR381618.1
amotl2b	1.54732e-09	0.370513	0.133	0.005	1.81717e-05	4	amotl2b
erh1	1.56073e-09	0.549908	0.6	0.097	1.83292e-05	4	erh
spata2l	1.59963e-09	0.170971	0.2	0.011	1.8786e-05	4	spata2l
dnmbp	1.62892e-09	0.286378	0.4	0.047	1.91301e-05	4	dnmbp
alcama	1.63101e-09	0.967431	1	0.438	1.91546e-05	4	alcama
chchd1	1.65339e-09	0.173231	0.133	0.005	1.94175e-05	4	chchd1
pin4	1.65619e-09	0.296198	0.267	0.021	1.94503e-05	4	pin4
gmpr2	1.65633e-09	0.498305	0.4	0.047	1.9452e-05	4	gmpr2
kctd10	1.6741e-09	0.169843	0.2	0.011	1.96607e-05	4	kctd10
nr1d1	1.6741e-09	0.169843	0.2	0.011	1.96607e-05	4	nr1d1
bcl2a	1.6741e-09	0.169843	0.2	0.011	1.96607e-05	4	bcl2a
wipf1b	1.69012e-09	0.173231	0.133	0.005	1.98488e-05	4	wipf1b
ttll12	1.69024e-09	0.118337	0.133	0.005	1.98502e-05	4	ttll12
zgc:110796	1.69024e-09	0.118337	0.133	0.005	1.98502e-05	4	zgc:110796
stag1b	1.69024e-09	0.118337	0.133	0.005	1.98502e-05	4	stag1b
nipa2	1.69497e-09	0.20714	0.267	0.021	1.99058e-05	4	nipa2
si:ch211-79k12.1	1.75187e-09	0.168716	0.2	0.011	2.0574e-05	4	si:ch211-79k12.1
tars	1.76656e-09	0.117204	0.133	0.005	2.07465e-05	4	tars
si:dkey-16p21.8	1.7666e-09	0.116072	0.133	0.005	2.0747e-05	4	si:dkey-16p21.8
amotl2a	1.80599e-09	0.169843	0.133	0.005	2.12096e-05	4	amotl2a
nelfa	1.84615e-09	0.116072	0.133	0.005	2.16812e-05	4	nelfa
her62	1.88137e-09	1.00795	0.867	0.202	2.20948e-05	4	her6
lims11	2.00102e-09	0.367043	0.533	0.081	2.34999e-05	4	lims1
ddx52	2.0064e-09	0.214931	0.2	0.011	2.35632e-05	4	ddx52
si:ch73-376l24.2	2.09869e-09	0.164222	0.2	0.011	2.4647e-05	4	si:ch73-376l24.2
xiap	2.19525e-09	0.161982	0.2	0.011	2.5781e-05	4	xiap
cd74b1	2.36423e-09	1.0402	0.6	0.106	2.77655e-05	4	cd74b
cd81a1	2.78842e-09	0.558322	0.933	0.217	3.27472e-05	4	cd81a
ndufb5	2.87981e-09	0.382014	0.733	0.13	3.38205e-05	4	ndufb5
pcnt	2.88354e-09	0.261765	0.267	0.022	3.38643e-05	4	pcnt
stat2	2.8947e-09	0.453399	0.467	0.063	3.39954e-05	4	stat2
gata61	3.04194e-09	0.59152	0.667	0.124	3.57245e-05	4	gata6
tgif1	3.1721e-09	0.397855	0.533	0.079	3.72531e-05	4	tgif1
sptlc2a	3.47203e-09	0.254009	0.333	0.034	4.07755e-05	4	sptlc2a
ints1	3.68881e-09	0.210472	0.267	0.022	4.33214e-05	4	ints1
psme1	3.79543e-09	0.428756	0.533	0.081	4.45736e-05	4	psme1
tnpo2	4.31715e-09	0.249604	0.267	0.022	5.07006e-05	4	tnpo2
btbd6a1	4.57924e-09	0.245218	0.333	0.034	5.37785e-05	4	btbd6a
dazap2	4.63811e-09	0.272362	0.333	0.033	5.44699e-05	4	dazap2
mrpl28	4.87884e-09	0.245218	0.267	0.022	5.72971e-05	4	mrpl28
tubgcp3	5.01761e-09	0.244124	0.333	0.034	5.89268e-05	4	tubgcp3
ktn1	5.90687e-09	0.361195	0.4	0.05	6.93703e-05	4	ktn1
rrp12	6.40259e-09	0.270704	0.2	0.013	7.5192e-05	4	rrp12
ctnnb11	6.4857e-09	0.321111	0.6	0.096	7.61681e-05	4	ctnnb1
prpf6	6.58108e-09	0.222783	0.2	0.013	7.72882e-05	4	prpf6
tmsb4x1	6.65454e-09	1.12915	1	0.443	7.81509e-05	4	tmsb4x
tasp1	6.68945e-09	0.251804	0.333	0.035	7.85609e-05	4	tasp1
pttg1ipb	6.89482e-09	0.312478	0.333	0.034	8.09727e-05	4	pttg1ipb
dhodh	6.99694e-09	0.249604	0.333	0.035	8.2172e-05	4	dhodh
tex2	7.35641e-09	0.169843	0.2	0.013	8.63937e-05	4	tex2
asnsd1	7.59113e-09	0.27773	0.4	0.05	8.91502e-05	4	asnsd1
si:dkeyp-118h3.6	7.6732e-09	0.168716	0.2	0.013	9.0114e-05	4	si:dkeyp-118h3.6
gbf1	7.85614e-09	0.212699	0.267	0.023	9.22625e-05	4	gbf1
arl5a	8.00287e-09	0.16759	0.2	0.013	9.39858e-05	4	arl5a
g3bp1	8.00813e-09	0.308333	0.2	0.013	9.40475e-05	4	g3bp1
rps6ka3a	8.11958e-09	0.217168	0.2	0.013	9.53564e-05	4	rps6ka3a
fnip1	8.20357e-09	0.211585	0.267	0.023	9.63427e-05	4	fnip1
cyp2ad3	8.34602e-09	0.163101	0.2	0.013	9.80156e-05	4	cyp2ad3
rad23b	9.07429e-09	0.164222	0.2	0.013	0.000106568	4	rad23b
lsm7	9.4196e-09	0.220365	0.333	0.034	0.000110624	4	lsm7
id1	1.0233e-08	1.02818	0.467	0.07	0.000120176	4	id1
nasp	1.11726e-08	0.288552	0.2	0.013	0.000131211	4	nasp
copb1	1.27383e-08	0.275579	0.4	0.051	0.000149598	4	copb1
her91	1.28095e-08	0.635635	0.533	0.087	0.000150435	4	her9
ccnd2a1	1.36278e-08	0.288305	0.4	0.05	0.000160045	4	ccnd2a
magoh	1.4374e-08	0.290384	0.4	0.049	0.000168809	4	magoh
commd4	1.45408e-08	0.30295	0.467	0.07	0.000170767	4	commd4
os9	1.47238e-08	0.239762	0.267	0.023	0.000172917	4	os9
canx1	1.67218e-08	0.238674	0.4	0.049	0.000196381	4	canx
mpzl2b	1.84436e-08	0.441376	0.333	0.038	0.000216602	4	mpzl2b
taf15	1.96899e-08	0.41096	0.333	0.037	0.000231238	4	taf15
slc9a7	2.02099e-08	0.20825	0.267	0.024	0.000237346	4	slc9a7
CU468917.1	2.10598e-08	0.20714	0.267	0.024	0.000247327	4	CU468917.1
trmt61b	2.14639e-08	0.248505	0.333	0.038	0.000252072	4	trmt61b
ranbp1	2.63794e-08	0.387569	0.933	0.211	0.000309799	4	ranbp1
si:dkey-93n13.1	2.67539e-08	0.17663	0.133	0.006	0.000314197	4	si:dkey-93n13.1
stxbp5a	2.67539e-08	0.17663	0.133	0.006	0.000314197	4	stxbp5a
lgmn	2.6893e-08	0.340052	0.4	0.053	0.000315831	4	lgmn
kras	2.79166e-08	0.309292	0.467	0.073	0.000327852	4	kras
znf1050	2.94069e-08	0.119472	0.133	0.006	0.000345355	4	znf1050
inpp4ab	2.94069e-08	0.119472	0.133	0.006	0.000345355	4	inpp4ab
si:ch211-214p13.9	2.94069e-08	0.119472	0.133	0.006	0.000345355	4	si:ch211-214p13.9
efna5b	2.94069e-08	0.119472	0.133	0.006	0.000345355	4	efna5b
mier3b	2.94069e-08	0.119472	0.133	0.006	0.000345355	4	mier3b
irf2bp2a	2.94069e-08	0.119472	0.133	0.006	0.000345355	4	irf2bp2a
tmem106bb	2.94069e-08	0.119472	0.133	0.006	0.000345355	4	tmem106bb
cav2	2.94069e-08	0.119472	0.133	0.006	0.000345355	4	cav2
zgc:1717501	3.03315e-08	0.462906	0.2	0.014	0.000356213	4	zgc:171750
vasna	3.11099e-08	0.165343	0.2	0.014	0.000365355	4	vasna
xab2	3.1128e-08	0.1721	0.133	0.006	0.000365567	4	xab2
gtf2h3	3.23223e-08	0.170971	0.133	0.006	0.000379593	4	gtf2h3
sgf29	3.23223e-08	0.170971	0.133	0.006	0.000379593	4	sgf29
rnf144b	3.24535e-08	0.317812	0.4	0.055	0.000381134	4	rnf144b
dhx37	3.42057e-08	0.114942	0.133	0.006	0.000401712	4	dhx37
ino80e	3.49645e-08	0.158632	0.2	0.014	0.000410623	4	ino80e
arl4ab1	3.54737e-08	0.228939	0.333	0.038	0.000416604	4	arl4ab
got2a	3.74231e-08	0.307173	0.467	0.074	0.000439496	4	got2a
slc26a5	3.7536e-08	0.246312	0.333	0.039	0.000440823	4	slc26a5
im:7147486	3.9649e-08	0.20936	0.267	0.025	0.000465638	4	im:7147486
CABZ01086293.1	3.9649e-08	0.20936	0.267	0.025	0.000465638	4	CABZ01086293.1
tent5ba	3.96491e-08	0.20825	0.267	0.025	0.000465639	4	tent5ba
ciapin1	4.24534e-08	0.243032	0.333	0.039	0.000498572	4	ciapin1
pbdc1	4.30827e-08	0.323002	0.6	0.104	0.000505964	4	pbdc1
oxa1l	4.46541e-08	0.206032	0.267	0.025	0.000524418	4	oxa1l
ecm1b1	4.50629e-08	1.00427	1	0.461	0.000529218	4	ecm1b
hnrnpabb1	4.70719e-08	0.604491	0.6	0.106	0.000552812	4	hnrnpabb
eif2b4	4.86799e-08	0.276654	0.4	0.056	0.000571697	4	eif2b4
snrpf1	4.93506e-08	0.377544	0.667	0.128	0.000579574	4	snrpf
mmadhc	5.13236e-08	0.264895	0.4	0.055	0.000602745	4	mmadhc
mrpl34	5.33881e-08	0.220365	0.333	0.038	0.00062699	4	mrpl34
mbnl31	6.10298e-08	0.563906	0.667	0.144	0.000716734	4	mbnl3
cox7c1	7.22197e-08	0.540202	0.8	0.187	0.000848148	4	cox7c
ptprea	7.82153e-08	0.220533	0.2	0.015	0.00091856	4	ptprea
ppp3r1b	7.86779e-08	0.332757	0.467	0.076	0.000923993	4	ppp3r1b
per31	8.18652e-08	0.370138	0.4	0.056	0.000961425	4	per3
retreg3	8.30391e-08	0.20714	0.267	0.026	0.000975212	4	retreg3
l3mbtl2	8.30391e-08	0.20714	0.267	0.026	0.000975212	4	l3mbtl2
nup155	8.82956e-08	0.16759	0.2	0.015	0.00103694	4	nup155
dhrs3b	9.1598e-08	0.166466	0.2	0.015	0.00107573	4	dhrs3b
noc2l	9.41026e-08	0.245218	0.333	0.041	0.00110514	4	noc2l
pgm2	9.43358e-08	0.420996	0.6	0.126	0.00110788	4	pgm2
nrxn2b	9.50165e-08	0.164222	0.2	0.015	0.00111587	4	nrxn2b
atp5md	9.73647e-08	0.43633	0.533	0.095	0.00114345	4	atp5md
cox6a11	1.02539e-07	0.518337	0.667	0.137	0.00120422	4	cox6a1
prkcdb	1.14437e-07	0.260653	0.267	0.027	0.00134394	4	prkcdb
pgrmc2	1.21084e-07	0.238674	0.267	0.026	0.00142202	4	pgrmc2
znf3301	1.23514e-07	0.232174	0.333	0.041	0.00145054	4	znf330
inhbaa1	1.26198e-07	0.460501	0.6	0.116	0.00148207	4	inhbaa
tjp1a1	1.27284e-07	0.316401	0.6	0.113	0.00149482	4	tjp1a
rrp1	1.30047e-07	0.312478	0.4	0.059	0.00152727	4	rrp1
isg15	1.32151e-07	0.488437	0.533	0.098	0.00155198	4	isg15
marveld2a	1.35147e-07	0.254009	0.267	0.027	0.00158717	4	marveld2a
waplb	1.35218e-07	0.267023	0.4	0.058	0.001588	4	waplb
adgrb1a	1.47792e-07	0.20825	0.267	0.027	0.00173567	4	adgrb1a
si:dkey-74k8.3	1.53337e-07	0.20714	0.267	0.027	0.00180079	4	si:dkey-74k8.3
colec111	1.58193e-07	0.40756	0.4	0.057	0.00185782	4	colec11
aldh1a2	1.59901e-07	0.387067	0.867	0.205	0.00187788	4	aldh1a2
dohh	1.67826e-07	0.263833	0.333	0.041	0.00197095	4	dohh
znf207b	1.71166e-07	0.20382	0.267	0.027	0.00201017	4	znf207b
p4ha1b1	1.74868e-07	0.3173	0.4	0.057	0.00205365	4	p4ha1b
h3f3a1	1.81059e-07	0.46883	0.6	0.112	0.00212636	4	h3f3a
degs1	1.85462e-07	0.310353	0.4	0.061	0.00217807	4	degs1
commd2	1.90934e-07	0.19941	0.267	0.027	0.00224233	4	commd2
atp2b4	2.12897e-07	0.279885	0.267	0.027	0.00250026	4	atp2b4
emc10	2.19411e-07	0.274896	0.4	0.057	0.00257677	4	emc10
slc25a55a	2.34929e-07	0.234336	0.267	0.027	0.002759	4	slc25a55a
zgc:77086	2.36549e-07	0.265958	0.333	0.042	0.00277803	4	zgc:77086
nlrx1	2.4626e-07	0.166466	0.2	0.016	0.00289207	4	nlrx1
ube2l3b	2.47706e-07	0.316278	0.4	0.058	0.00290906	4	ube2l3b
nvl	2.54899e-07	0.165343	0.2	0.016	0.00299353	4	nvl
eif4g1a	2.55848e-07	0.331632	0.467	0.078	0.00300468	4	eif4g1a
arid4a	2.61888e-07	0.276654	0.333	0.043	0.00307562	4	arid4a
prpf18	2.62069e-07	0.20825	0.267	0.029	0.00307773	4	prpf18
si:rp71-68n21.9	2.69958e-07	0.118337	0.133	0.007	0.00317039	4	si:rp71-68n21.9
sash1b	2.69958e-07	0.118337	0.133	0.007	0.00317039	4	sash1b
fancl	2.69958e-07	0.118337	0.133	0.007	0.00317039	4	fancl
si:dkey-30c15.10	2.69958e-07	0.118337	0.133	0.007	0.00317039	4	si:dkey-30c15.10
igf1ra	2.69958e-07	0.118337	0.133	0.007	0.00317039	4	igf1ra
trpm4b.2	2.69958e-07	0.118337	0.133	0.007	0.00317039	4	trpm4b.2
CABZ01038524.1	2.7156e-07	0.206032	0.267	0.029	0.0031892	4	CABZ01038524.1
si:ch211-212o1.2	2.7156e-07	0.206032	0.267	0.029	0.0031892	4	si:ch211-212o1.2
ssh1b	2.79038e-07	0.117204	0.133	0.007	0.00327703	4	ssh1b
tmx4	2.79038e-07	0.117204	0.133	0.007	0.00327703	4	tmx4
svild1	2.80148e-07	0.290384	0.333	0.042	0.00329006	4	svild
glmp	2.87406e-07	0.286378	0.333	0.045	0.00337529	4	glmp
plod3	2.98019e-07	0.168716	0.133	0.007	0.00349994	4	plod3
drg1	2.98061e-07	0.114942	0.133	0.007	0.00350042	4	drg1
nup37	2.98076e-07	0.16759	0.133	0.007	0.00350061	4	nup37
mdm4	3.04423e-07	0.175496	0.267	0.027	0.00357515	4	mdm4
hnrnpr	3.04449e-07	0.205534	0.333	0.041	0.00357544	4	hnrnpr
carm1	3.09537e-07	0.204926	0.2	0.016	0.0036352	4	carm1
CR589944.1	3.14894e-07	0.18521	0.267	0.027	0.00369811	4	CR589944.1
cldn7b	3.18314e-07	0.105943	0.133	0.007	0.00373828	4	cldn7b
vps26c	3.23809e-07	0.156405	0.2	0.016	0.00380281	4	vps26c
tshz3b	3.25777e-07	0.243032	0.333	0.045	0.00382592	4	tshz3b
si:dkey-241l7.6	3.28921e-07	0.243032	0.133	0.007	0.00386285	4	si:dkey-241l7.6
atp1b3a	3.90437e-07	0.235419	0.333	0.045	0.00458529	4	atp1b3a
capns1a	3.9324e-07	0.246611	0.467	0.076	0.00461821	4	capns1a
slc38a3b1	4.0438e-07	0.265958	0.4	0.063	0.00474903	4	slc38a3b
cavin1b	4.35875e-07	0.224643	0.267	0.029	0.00511891	4	cavin1b
tefa	4.62829e-07	0.319775	0.467	0.079	0.00543547	4	tefa
golph3	4.74707e-07	0.189557	0.267	0.029	0.00557496	4	golph3
jcada	4.96053e-07	0.204926	0.267	0.03	0.00582564	4	jcada
srgap2	4.96053e-07	0.204926	0.267	0.03	0.00582564	4	srgap2
BX957362.1	4.96053e-07	0.20382	0.267	0.03	0.00582565	4	BX957362.1
BX927333.1	4.96053e-07	0.20382	0.267	0.03	0.00582565	4	BX927333.1
gpatch11	5.31105e-07	0.201612	0.267	0.03	0.00623729	4	gpatch11
clstn1	5.31105e-07	0.201612	0.267	0.03	0.00623729	4	clstn1
arpp19b	5.4442e-07	0.183043	0.267	0.029	0.00639367	4	arpp19b
sfxn5b	5.4948e-07	0.201612	0.267	0.03	0.0064531	4	sfxn5b
ctdsp2	5.62581e-07	0.296856	0.6	0.119	0.00660695	4	ctdsp2
atp5if1a	5.7343e-07	0.452677	0.467	0.081	0.00673437	4	atp5if1a
pagr1	5.88057e-07	0.197212	0.267	0.03	0.00690615	4	pagr1
utp3	6.02412e-07	0.297695	0.333	0.045	0.00707473	4	utp3
si:dkey-209n16.2	6.13693e-07	0.165343	0.2	0.017	0.00720721	4	si:dkey-209n16.2
rab11fip1b	6.13693e-07	0.165343	0.2	0.017	0.00720721	4	rab11fip1b
mt-nd51	6.27323e-07	0.546711	0.867	0.251	0.00736728	4	mt-nd5
snip1	6.60087e-07	0.231095	0.333	0.046	0.00775207	4	snip1
s100a10b1	6.76972e-07	0.363334	0.2	0.017	0.00795035	4	s100a10b
smim7	6.83981e-07	0.255113	0.2	0.017	0.00803267	4	smim7
gpc4	7.01594e-07	0.307173	0.4	0.066	0.00823951	4	gpc4
slmapa	7.22986e-07	0.252906	0.267	0.031	0.00849074	4	slmapa
ip6k2b	7.44024e-07	0.264895	0.267	0.03	0.00873782	4	ip6k2b
gtf2h5	7.53046e-07	0.204926	0.2	0.017	0.00884377	4	gtf2h5
snrpb2	7.85848e-07	0.20382	0.2	0.017	0.00922899	4	snrpb2
sft2d3	7.8939e-07	0.206032	0.267	0.031	0.0092706	4	sft2d3
lsp11	8.16005e-07	0.204926	0.267	0.031	0.00958316	4	lsp1
g6pc3	8.43454e-07	0.20382	0.267	0.031	0.00990552	4	g6pc3
zgc:114104	8.43454e-07	0.20382	0.267	0.031	0.00990552	4	zgc:114104
retsatl	8.46833e-07	0.351625	0.2	0.017	0.00994521	4	retsatl
abhd17b	8.71764e-07	0.20051	0.267	0.031	0.010238	4	abhd17b
nid1a	9.00953e-07	0.201612	0.267	0.031	0.0105808	4	nid1a
mrpl13	9.02029e-07	0.151965	0.2	0.017	0.0105934	4	mrpl13
sart1	9.0748e-07	0.183043	0.267	0.03	0.0106574	4	sart1
gys1	9.35749e-07	0.261712	0.4	0.066	0.0109894	4	gys1
pkma	9.86454e-07	0.452801	0.6	0.135	0.0115849	4	pkma
hspa9	1.00701e-06	0.280166	0.467	0.082	0.0118263	4	hspa9
cnp	1.08311e-06	0.338615	0.333	0.046	0.0127201	4	cnp
sub1b	1.12566e-06	0.266732	0.4	0.064	0.0132197	4	sub1b
atp5mc3a	1.13378e-06	0.457217	0.733	0.188	0.0133152	4	atp5mc3a
fam120a	1.13483e-06	0.415659	0.467	0.09	0.0133274	4	fam120a
npm31	1.15697e-06	0.248035	0.333	0.046	0.0135874	4	npm3
gorasp1a	1.25739e-06	0.216049	0.2	0.018	0.0147667	4	gorasp1a
si:zfos-464b6.2	1.2578e-06	0.230016	0.267	0.031	0.0147716	4	si:zfos-464b6.2
rbm4.3	1.266e-06	0.437399	0.533	0.105	0.0148679	4	rbm4.3
ptk2ab	1.30175e-06	0.204926	0.267	0.032	0.0152878	4	ptk2ab
tpd52	1.3909e-06	0.164222	0.2	0.018	0.0163347	4	tpd52
mapre3b	1.4436e-06	0.326545	0.467	0.092	0.0169537	4	mapre3b
adnpb	1.45172e-06	0.236503	0.333	0.049	0.017049	4	adnpb
ptbp1a1	1.45362e-06	0.237687	0.467	0.083	0.0170713	4	ptbp1a
nedd1	1.47889e-06	0.161982	0.2	0.018	0.0173681	4	nedd1
gemin4	1.47889e-06	0.160864	0.2	0.018	0.0173681	4	gemin4
piga	1.47926e-06	0.19831	0.267	0.032	0.0173725	4	piga
tra2b	1.51038e-06	0.250703	0.2	0.018	0.0177379	4	tra2b
si:dkey-26m3.3	1.52387e-06	0.117204	0.133	0.008	0.0178964	4	si:dkey-26m3.3
arhgef40	1.52387e-06	0.117204	0.133	0.008	0.0178964	4	arhgef40
neurl1b	1.52387e-06	0.117204	0.133	0.008	0.0178964	4	neurl1b
p2rx4a	1.52387e-06	0.117204	0.133	0.008	0.0178964	4	p2rx4a
mrps9	1.52701e-06	0.19941	0.267	0.032	0.0179332	4	mrps9
ifnphi1	1.56922e-06	0.116072	0.133	0.008	0.0184289	4	ifnphi1
thbs4b	1.57203e-06	0.158632	0.2	0.018	0.018462	4	thbs4b
tmem238a	1.61581e-06	0.114942	0.133	0.008	0.0189761	4	tmem238a
polr3h	1.6637e-06	0.166466	0.133	0.008	0.0195385	4	polr3h
cdc14b	1.6709e-06	0.204926	0.2	0.018	0.019623	4	cdc14b
mrpl20	1.70455e-06	0.204926	0.2	0.018	0.0200183	4	mrpl20
mob1ba	1.71286e-06	0.112684	0.133	0.008	0.0201158	4	mob1ba
hars	1.73289e-06	0.191739	0.267	0.032	0.0203511	4	hars
gpn2	1.76344e-06	0.110432	0.133	0.008	0.0207098	4	gpn2
drap1	1.81878e-06	0.314766	0.667	0.15	0.0213597	4	drap1
mrps25	1.82864e-06	0.19941	0.2	0.018	0.0214756	4	mrps25
sucla2	1.84512e-06	0.191739	0.267	0.032	0.0216691	4	sucla2
kdelr2a	1.86622e-06	0.195019	0.2	0.018	0.0219169	4	kdelr2a
zgc:77056	1.87857e-06	0.259596	0.4	0.07	0.0220619	4	zgc:77056
arrdc3a	1.95424e-06	0.656091	0.667	0.185	0.0229506	4	arrdc3a
washc2c	2.00216e-06	0.147545	0.2	0.018	0.0235133	4	washc2c
leo1	2.06305e-06	0.144243	0.2	0.018	0.0242285	4	leo1
arhgef4	2.14965e-06	0.251175	0.4	0.07	0.0252454	4	arhgef4
acbd3	2.2194e-06	0.233254	0.333	0.05	0.0260646	4	acbd3
mcl1b1	2.2495e-06	0.417586	0.467	0.089	0.0264181	4	mcl1b
ints2	2.28608e-06	0.20051	0.267	0.033	0.0268478	4	ints2
slc27a1a	2.30415e-06	0.336615	0.467	0.091	0.02706	4	slc27a1a
farsb	2.30595e-06	0.305059	0.4	0.072	0.0270811	4	farsb
letm2	2.36309e-06	0.28623	0.4	0.07	0.0277521	4	letm2
pbx4	2.63847e-06	0.238674	0.333	0.048	0.0309862	4	pbx4
wu:fc75a09	2.66222e-06	0.26162	0.467	0.088	0.0312652	4	wu:fc75a09
cdkn2aip	2.67329e-06	0.236503	0.333	0.051	0.0313951	4	cdkn2aip
rpl37	2.67329e-06	0.236503	0.333	0.051	0.0313951	4	rpl37
si:ch73-248e21.1	2.91984e-06	0.191739	0.267	0.033	0.0342906	4	si:ch73-248e21.1
rabac1	3.02603e-06	0.20936	0.2	0.019	0.0355377	4	rabac1
cops7a	3.08486e-06	0.252906	0.2	0.019	0.0362286	4	cops7a
tp53inp11	3.12916e-06	0.38961	0.533	0.12	0.0367488	4	tp53inp1
ptges3a	3.24889e-06	0.204483	0.333	0.049	0.038155	4	ptges3a
ctdsplb	3.34312e-06	0.201612	0.267	0.034	0.0392615	4	ctdsplb
ddx55	3.34312e-06	0.201612	0.267	0.034	0.0392615	4	ddx55
mef2aa	3.34499e-06	0.296647	0.4	0.073	0.0392836	4	mef2aa
2020-09-02	3.59516e-06	0.20051	0.2	0.019	0.0422215	4	2020-09-02
tjap1	3.61979e-06	0.235419	0.333	0.053	0.0425109	4	tjap1
sh3gl3b	3.69917e-06	0.19941	0.2	0.019	0.0434431	4	sh3gl3b
smarca4a	3.76955e-06	0.19941	0.2	0.019	0.0442696	4	smarca4a
cnot9	3.88156e-06	0.195019	0.267	0.034	0.045585	4	cnot9
eif4bb	4.02716e-06	0.264526	0.467	0.088	0.047295	4	eif4bb
sugt1	4.47198e-06	0.139857	0.2	0.019	0.0525189	4	sugt1
mt-nd11	4.73042e-06	0.758819	1	0.418	0.055554	4	mt-nd1
schip1	4.95148e-06	0.245616	0.467	0.092	0.0581501	4	schip1
bysl	5.02109e-06	0.32425	0.267	0.035	0.0589676	4	bysl
znf1007	5.07269e-06	0.20051	0.267	0.035	0.0595737	4	znf1007
tra2a1	5.07308e-06	0.305147	0.467	0.091	0.0595783	4	tra2a
agfg1b	5.22241e-06	0.19941	0.267	0.035	0.061332	4	agfg1b
edem1	5.3762e-06	0.197212	0.267	0.035	0.0631381	4	edem1
slc35a4	5.40781e-06	0.274896	0.467	0.098	0.0635093	4	slc35a4
CABZ01061894.1	5.47002e-06	0.227864	0.333	0.054	0.0642399	4	CABZ01061894.1
aebp2	5.50666e-06	0.173231	0.133	0.009	0.0646702	4	aebp2
kng1	5.50666e-06	0.173231	0.133	0.009	0.0646702	4	kng1
tomm22	5.51377e-06	0.224643	0.267	0.034	0.0647537	4	tomm22
pdcd10b	5.51945e-06	0.178723	0.267	0.034	0.0648204	4	pdcd10b
tapbpl	5.53414e-06	0.197212	0.267	0.035	0.064993	4	tapbpl
si:dkey-239h2.3	5.54587e-06	0.281062	0.333	0.051	0.0651307	4	si:dkey-239h2.3
zgc:85789	5.63747e-06	0.227864	0.333	0.054	0.0662064	4	zgc:85789
si:ch73-109d9.1	5.67252e-06	0.161982	0.2	0.021	0.0666181	4	si:ch73-109d9.1
ahcyl1	5.67252e-06	0.161982	0.2	0.021	0.0666181	4	ahcyl1
hexdc	5.67252e-06	0.161982	0.2	0.021	0.0666181	4	hexdc
mtmr11	5.83153e-06	0.160864	0.2	0.021	0.0684855	4	mtmr11
rel	5.99464e-06	0.159747	0.2	0.021	0.0704011	4	rel
nrp1a	5.99464e-06	0.159747	0.2	0.021	0.0704011	4	nrp1a
si:ch211-196h24.1	6.11594e-06	0.116072	0.133	0.009	0.0718256	4	si:ch211-196h24.1
igfbp2a	6.11594e-06	0.116072	0.133	0.009	0.0718256	4	igfbp2a
cobll1b	6.11594e-06	0.116072	0.133	0.009	0.0718256	4	cobll1b
si:ch211-269k10.2	6.11594e-06	0.116072	0.133	0.009	0.0718256	4	si:ch211-269k10.2
BX547930.4	6.11594e-06	0.116072	0.133	0.009	0.0718256	4	BX547930.4
arhgap12b	6.11594e-06	0.116072	0.133	0.009	0.0718256	4	arhgap12b
zgc:112083	6.11594e-06	0.116072	0.133	0.009	0.0718256	4	zgc:112083
ndufa3	6.12458e-06	0.278765	0.667	0.16	0.0719271	4	ndufa3
timm17a	6.19449e-06	0.174422	0.267	0.034	0.0727481	4	timm17a
map3k7	6.26711e-06	0.208694	0.333	0.053	0.0736009	4	map3k7
si:ch211-256e16.11	6.27901e-06	0.114942	0.133	0.009	0.0737407	4	si:ch211-256e16.11
si:dkey-83k24.5	6.27901e-06	0.114942	0.133	0.009	0.0737407	4	si:dkey-83k24.5
zgc:101016	6.28008e-06	0.217168	0.133	0.009	0.0737533	4	zgc:101016
vamp3	6.36928e-06	0.415846	0.733	0.209	0.0748009	4	vamp3
manea	6.60921e-06	0.232174	0.333	0.055	0.0776186	4	manea
adsl	6.70419e-06	0.164222	0.133	0.009	0.078734	4	adsl
si:dkeyp-98a7.3	6.79262e-06	0.258434	0.133	0.009	0.0797725	4	si:dkeyp-98a7.3
cdc34a	6.97198e-06	0.110432	0.133	0.009	0.0818789	4	cdc34a
ttf2	6.97216e-06	0.109308	0.133	0.009	0.0818811	4	ttf2
utp4	6.97216e-06	0.109308	0.133	0.009	0.0818811	4	utp4
plrg1	7.06524e-06	0.149753	0.2	0.021	0.0829742	4	plrg1
ost41	7.22058e-06	0.321399	0.333	0.054	0.0847985	4	ost4
dynll2b	7.27207e-06	0.330682	0.267	0.035	0.0854032	4	dynll2b
snrnp70	7.34807e-06	0.169072	0.267	0.034	0.0862958	4	snrnp70
psmd11a	7.53753e-06	0.105943	0.133	0.009	0.0885208	4	psmd11a
zp3a.2	7.53858e-06	0.321026	0.133	0.009	0.0885331	4	zp3a.2
mid1ip1l1	8.01905e-06	0.301896	0.2	0.021	0.0941757	4	mid1ip1l
wasla	8.01942e-06	0.250127	0.333	0.054	0.0941801	4	wasla
kri1	8.31038e-06	0.142048	0.2	0.021	0.0975971	4	kri1
psmd71	8.48243e-06	0.218233	0.267	0.035	0.0996177	4	psmd7
rpz3	8.4999e-06	0.250703	0.267	0.038	0.0998228	4	rpz3
si:ch211-271b14.1	8.53365e-06	0.145343	0.2	0.021	0.100219	4	si:ch211-271b14.1
mcm61	8.76553e-06	0.258434	0.2	0.022	0.102942	4	mcm6
pam	8.82065e-06	0.301896	0.4	0.08	0.10359	4	pam
si:ch211-210c8.6	8.912e-06	0.228939	0.333	0.056	0.104663	4	si:ch211-210c8.6
boc1	9.15447e-06	0.189557	0.267	0.037	0.10751	4	boc
ppp1r12a	9.6889e-06	0.269155	0.267	0.037	0.113786	4	ppp1r12a
znf576.2	9.82046e-06	0.269155	0.267	0.037	0.115331	4	znf576.2
ncl1	9.9658e-06	0.543901	0.867	0.276	0.117038	4	ncl
rcn1	1.06012e-05	0.232174	0.333	0.057	0.124501	4	rcn1
si:ch211-108c17.2	1.07005e-05	0.159747	0.2	0.022	0.125667	4	si:ch211-108c17.2
bckdk	1.09142e-05	0.245655	0.6	0.138	0.128176	4	bckdk
zgc:113314	1.12771e-05	0.155293	0.2	0.022	0.132438	4	zgc:113314
pim21	1.13844e-05	0.262507	0.467	0.094	0.133698	4	pim2
aktip	1.13992e-05	0.263833	0.267	0.037	0.133872	4	aktip
znf219	1.1576e-05	0.155293	0.2	0.022	0.135948	4	znf219
ddx47	1.1649e-05	0.222502	0.267	0.037	0.136806	4	ddx47
tmem591	1.1764e-05	0.336999	0.533	0.123	0.138156	4	tmem59
zgc:153867	1.18178e-05	0.456398	0.667	0.179	0.138789	4	zgc:153867
gpt2l	1.22071e-05	0.273433	0.333	0.058	0.143361	4	gpt2l
dgcr6	1.25167e-05	0.151965	0.2	0.022	0.146996	4	dgcr6
cndp2	1.25215e-05	0.190647	0.267	0.038	0.147052	4	cndp2
stxbp2	1.25218e-05	0.195019	0.2	0.022	0.147056	4	stxbp2
si:ch73-376l24.6	1.35276e-05	0.145343	0.2	0.022	0.158868	4	si:ch73-376l24.6
il151	1.36459e-05	0.191739	0.2	0.022	0.160257	4	il15
tcea1	1.376e-05	0.193924	0.2	0.022	0.161598	4	tcea1
coro1ca	1.38056e-05	0.171208	0.267	0.037	0.162133	4	coro1ca
rab7a	1.41844e-05	0.170139	0.267	0.037	0.166582	4	rab7a
ch25hl31	1.41938e-05	0.1574	0.267	0.037	0.166692	4	ch25hl3
dnajc19	1.42425e-05	0.145343	0.2	0.022	0.167264	4	dnajc19
uri11	1.42498e-05	0.269155	0.267	0.038	0.16735	4	uri1
pa2g4b	1.4325e-05	0.182322	0.4	0.072	0.168233	4	pa2g4b
supt4h1	1.45709e-05	0.169072	0.267	0.037	0.171121	4	supt4h1
errfi1a1	1.50112e-05	0.376438	0.4	0.082	0.176292	4	errfi1a
cpne1	1.52714e-05	0.280403	0.533	0.12	0.179347	4	cpne1
plekha61	1.55557e-05	0.329646	0.4	0.083	0.182686	4	plekha6
si:ch211-262i1.5	1.56909e-05	0.224643	0.333	0.058	0.184274	4	si:ch211-262i1.5
ncor11	1.59735e-05	0.242635	0.4	0.075	0.187592	4	ncor1
golga7	1.60971e-05	0.416658	0.6	0.159	0.189044	4	golga7
ednrab	1.61336e-05	0.224643	0.333	0.058	0.189473	4	ednrab
hdac4	1.68865e-05	0.273872	0.467	0.107	0.198316	4	hdac4
zgc:194207	1.72009e-05	0.1721	0.133	0.01	0.202008	4	zgc:194207
mt-nd31	1.72236e-05	0.509654	0.667	0.196	0.202274	4	mt-nd3
mprip	1.73023e-05	0.191739	0.267	0.039	0.203198	4	mprip
atf7ip1	1.76839e-05	0.2367	0.4	0.075	0.20768	4	atf7ip
etfa	1.79374e-05	0.204083	0.4	0.074	0.210657	4	etfa
BOLA2	1.82611e-05	0.218289	0.133	0.01	0.214459	4	BOLA2
mknk2b1	1.84232e-05	0.356126	0.933	0.289	0.216362	4	mknk2b
rpf2	1.85565e-05	0.216105	0.267	0.038	0.217927	4	rpf2
msrb3	1.88941e-05	0.224643	0.333	0.059	0.221893	4	msrb3
urb2	1.91131e-05	0.157518	0.2	0.023	0.224464	4	urb2
lnx2a	1.91131e-05	0.156405	0.2	0.023	0.224464	4	lnx2a
kdm5c	1.91343e-05	0.246312	0.2	0.023	0.224714	4	kdm5c
bin2b	1.91434e-05	0.114942	0.133	0.01	0.22482	4	bin2b
mbnl1	1.91434e-05	0.114942	0.133	0.01	0.22482	4	mbnl1
cdk20	1.91434e-05	0.114942	0.133	0.01	0.22482	4	cdk20
p4ha1a	1.91434e-05	0.114942	0.133	0.01	0.22482	4	p4ha1a
slc37a4b.1	1.91434e-05	0.114942	0.133	0.01	0.22482	4	slc37a4b.1
lig1	1.93778e-05	0.214931	0.133	0.01	0.227573	4	lig1
fmr1	1.95523e-05	0.243864	0.333	0.057	0.229622	4	fmr1
caska	1.95972e-05	0.155293	0.2	0.023	0.230149	4	caska
atp1b1a1	1.9943e-05	0.604188	1	0.581	0.234211	4	atp1b1a
vamp4	2.00923e-05	0.155293	0.2	0.023	0.235964	4	vamp4
gps2	2.05615e-05	0.163101	0.133	0.01	0.241475	4	gps2
sephs2	2.08034e-05	0.163101	0.133	0.01	0.244315	4	sephs2
ubxn1	2.10552e-05	0.157518	0.133	0.01	0.247273	4	ubxn1
atpaf2	2.11171e-05	0.153073	0.2	0.023	0.247999	4	atpaf2
si:ch211-130m23.5	2.17665e-05	0.196115	0.267	0.04	0.255626	4	si:ch211-130m23.5
si:ch211-106e7.2	2.18116e-05	0.159747	0.133	0.01	0.256155	4	si:ch211-106e7.2
glyr1	2.19143e-05	0.189884	0.333	0.056	0.257362	4	glyr1
coil	2.20718e-05	0.108185	0.133	0.01	0.259211	4	coil
mrm1	2.23377e-05	0.195019	0.267	0.04	0.262334	4	mrm1
depdc5	2.23377e-05	0.195019	0.267	0.04	0.262334	4	depdc5
sf3a3	2.23699e-05	0.197212	0.2	0.023	0.262712	4	sf3a3
pqbp1	2.25997e-05	0.103706	0.133	0.01	0.265411	4	pqbp1
ppp5c	2.29226e-05	0.193924	0.267	0.04	0.269204	4	ppp5c
ypel3	2.31362e-05	0.104823	0.133	0.01	0.271712	4	ypel3
sec24c	2.32256e-05	0.226789	0.333	0.061	0.272762	4	sec24c
tmem161b	2.35216e-05	0.191739	0.267	0.04	0.276237	4	tmem161b
prpf19	2.46798e-05	0.190647	0.2	0.023	0.289839	4	prpf19
cd99l2	2.57372e-05	0.289344	0.4	0.086	0.302258	4	cd99l2
cth	2.58623e-05	0.222502	0.333	0.061	0.303727	4	cth
uqcrc1	2.62423e-05	0.304567	0.8	0.228	0.30819	4	uqcrc1
mrpl47	2.63473e-05	0.142048	0.2	0.023	0.309423	4	mrpl47
cct31	2.63612e-05	0.34345	0.8	0.239	0.309586	4	cct3
cul4b	2.72242e-05	0.235574	0.333	0.058	0.319721	4	cul4b
lysmd3	2.85835e-05	0.238674	0.267	0.041	0.335685	4	lysmd3
narf	2.99501e-05	0.195019	0.267	0.041	0.351734	4	narf
syne1a	3.02885e-05	0.158632	0.2	0.024	0.355708	4	syne1a
rab5aa	3.05575e-05	0.156346	0.267	0.039	0.358867	4	rab5aa
carnmt1	3.10247e-05	0.157518	0.2	0.024	0.364354	4	carnmt1
strn	3.10247e-05	0.157518	0.2	0.024	0.364354	4	strn
AL954741.2	3.10247e-05	0.157518	0.2	0.024	0.364354	4	AL954741.2
dhx57	3.10247e-05	0.156405	0.2	0.024	0.364354	4	dhx57
psmd14	3.1308e-05	0.164812	0.267	0.039	0.367681	4	psmd14
arf6b	3.14971e-05	0.192831	0.267	0.041	0.369902	4	arf6b
mipep	3.14971e-05	0.192831	0.267	0.041	0.369902	4	mipep
spon1b	3.17771e-05	0.156405	0.2	0.024	0.37319	4	spon1b
plk3	3.19108e-05	0.252223	0.267	0.04	0.37476	4	plk3
pdk2a	3.23578e-05	0.220365	0.333	0.062	0.38001	4	pdk2a
nhp2	3.29273e-05	0.162689	0.267	0.039	0.386698	4	nhp2
ywhae1	3.29823e-05	0.332936	0.667	0.183	0.387344	4	ywhae1
gb:bc139872	3.35608e-05	0.260653	0.333	0.063	0.394138	4	gb:bc139872
tob1a	3.41925e-05	0.375761	0.467	0.11	0.401557	4	tob1a
smarcc2	3.48017e-05	0.240747	0.4	0.086	0.408711	4	smarcc2
si:dkey-88p24.11	3.49556e-05	0.147545	0.2	0.024	0.410519	4	si:dkey-88p24.11
si:dkey-188i13.11	3.58102e-05	0.318882	0.2	0.024	0.420555	4	si:dkey-188i13.11
polr2l	3.60887e-05	0.235714	0.4	0.08	0.423826	4	polr2l
psmd13	3.63613e-05	0.238674	0.2	0.024	0.427027	4	psmd13
chchd6b	3.67676e-05	0.207464	0.6	0.146	0.431799	4	chchd6b
rbm14b	3.76963e-05	0.267023	0.333	0.064	0.442705	4	rbm14b
tent4b	3.7818e-05	0.193924	0.2	0.024	0.444135	4	tent4b
npc21	3.82571e-05	0.284115	0.333	0.059	0.449291	4	npc2
ap1ar	3.91618e-05	0.221433	0.333	0.063	0.459916	4	ap1ar
plpp1a1	3.94679e-05	0.248171	0.333	0.059	0.463511	4	plpp1a
fut8a	3.95958e-05	0.195019	0.267	0.042	0.465013	4	fut8a
selenos	4.02716e-05	0.140952	0.2	0.024	0.472949	4	selenos
dhrs13l11	4.09636e-05	0.232483	0.4	0.086	0.481077	4	dhrs13l1
mfge8b	4.09945e-05	0.500918	0.667	0.195	0.48144	4	mfge8b
tbca	4.27198e-05	0.297539	0.6	0.156	0.501701	4	tbca
bmp2k	4.30143e-05	0.268088	0.333	0.065	0.50516	4	bmp2k
zp3.2	4.3888e-05	0.524547	0.2	0.024	0.515421	4	zp3.2
mt-nd21	4.4228e-05	0.610469	1	0.549	0.519414	4	mt-nd2
rad17	4.46547e-05	0.241941	0.267	0.043	0.524425	4	rad17
ifi302	4.54022e-05	0.392326	0.467	0.113	0.533204	4	ifi30
rnf10	4.56871e-05	0.232606	0.6	0.15	0.536549	4	rnf10
st5	4.56882e-05	0.242824	0.4	0.088	0.536562	4	st5
chmp7	4.63825e-05	0.20382	0.2	0.025	0.544716	4	chmp7
pias4a	4.8512e-05	0.130058	0.2	0.024	0.569725	4	pias4a
txndc9	4.85805e-05	0.235058	0.533	0.127	0.570529	4	txndc9
si:dkey-28a3.2	4.96078e-05	0.156405	0.2	0.025	0.582594	4	si:dkey-28a3.2
si:dkey-240n22.8	4.97099e-05	0.113812	0.133	0.011	0.583793	4	si:dkey-240n22.8
hsd17b8	4.97099e-05	0.113812	0.133	0.011	0.583793	4	hsd17b8
si:ch211-194e15.5	4.97099e-05	0.113812	0.133	0.011	0.583793	4	si:ch211-194e15.5
ppm1lb	4.97099e-05	0.113812	0.133	0.011	0.583793	4	ppm1lb
sacs	4.97099e-05	0.113812	0.133	0.011	0.583793	4	sacs
si:dkey-230i18.2	4.97099e-05	0.113812	0.133	0.011	0.583793	4	si:dkey-230i18.2
rbm281	5.0387e-05	0.292059	0.4	0.087	0.591745	4	rbm28
kctd12.2	5.08055e-05	0.112684	0.133	0.011	0.59666	4	kctd12.2
acp6	5.08055e-05	0.112684	0.133	0.011	0.59666	4	acp6
tsta3	5.08055e-05	0.112684	0.133	0.011	0.59666	4	tsta3
si:ch211-247j9.1	5.08055e-05	0.112684	0.133	0.011	0.59666	4	si:ch211-247j9.1
CR388143.1	5.08055e-05	0.111557	0.133	0.011	0.59666	4	CR388143.1
ndufa7	5.0819e-05	0.164222	0.133	0.011	0.596818	4	ndufa7
npm1b	5.08288e-05	0.216105	0.333	0.064	0.596934	4	npm1b
si:ch211-262i1.6	5.13743e-05	0.163101	0.133	0.011	0.60334	4	si:ch211-262i1.6
zgc:175088	5.18235e-05	0.20029	0.267	0.041	0.608616	4	zgc:175088
si:dkey-11n14.1	5.19228e-05	0.111557	0.133	0.011	0.609781	4	si:dkey-11n14.1
pld2	5.19228e-05	0.111557	0.133	0.011	0.609781	4	pld2
sacm1la	5.19228e-05	0.111557	0.133	0.011	0.609781	4	sacm1la
ezrb	5.19297e-05	0.163101	0.133	0.011	0.609862	4	ezrb
si:ch73-174h16.4	5.19348e-05	0.154182	0.2	0.025	0.609922	4	si:ch73-174h16.4
cmtm7	5.19348e-05	0.154182	0.2	0.025	0.609922	4	cmtm7
AL954696.1	5.30622e-05	0.161982	0.133	0.011	0.623162	4	AL954696.1
rfc5	5.30622e-05	0.110432	0.133	0.011	0.623162	4	rfc5
zgc:114046	5.30625e-05	0.109308	0.133	0.011	0.623166	4	zgc:114046
tmem35	5.31352e-05	0.151965	0.2	0.025	0.62402	4	tmem35
cul5a	5.42084e-05	0.192831	0.267	0.043	0.636624	4	cul5a
exosc2	5.4224e-05	0.109308	0.133	0.011	0.636807	4	exosc2
snrpc	5.48072e-05	0.214133	0.333	0.061	0.643655	4	snrpc
zgc:1037001	5.50446e-05	0.510983	0.267	0.042	0.646444	4	zgc:103700
gcfc2	5.54097e-05	0.107063	0.133	0.011	0.650732	4	gcfc2
pxna	5.60002e-05	0.158632	0.133	0.011	0.657666	4	pxna
si:dkeyp-46h3.2	5.60151e-05	0.248505	0.133	0.011	0.657841	4	si:dkeyp-46h3.2
si:ch211-218c6.8	5.66166e-05	0.107063	0.133	0.011	0.664906	4	si:ch211-218c6.8
tsr1	5.66191e-05	0.104823	0.133	0.011	0.664935	4	tsr1
grinab	5.71767e-05	0.297057	0.333	0.063	0.671483	4	grinab
cd99	5.73415e-05	0.193924	0.2	0.025	0.673418	4	cd99
med29	5.78482e-05	0.105943	0.133	0.011	0.67937	4	med29
ube2a	5.78504e-05	0.103706	0.133	0.011	0.679396	4	ube2a
cd151l	5.78527e-05	0.101473	0.133	0.011	0.679422	4	cd151l
lman2	5.80823e-05	0.1574	0.267	0.041	0.682118	4	lman2
cops2	5.83166e-05	0.191957	0.333	0.062	0.684871	4	cops2
rex1bd	5.90886e-05	0.209749	0.333	0.064	0.693936	4	rex1bd
nup62l	5.91039e-05	0.104823	0.133	0.011	0.694116	4	nup62l
asna1	5.91091e-05	0.101473	0.133	0.011	0.694178	4	asna1
rab13	5.95219e-05	0.146443	0.2	0.025	0.699025	4	rab13
mtx2	5.99917e-05	0.188469	0.2	0.025	0.704543	4	mtx2
ube2d1b	6.01051e-05	0.212922	0.267	0.042	0.705874	4	ube2d1b
mt-atp61	6.03344e-05	0.599036	1	0.815	0.708567	4	mt-atp6
cox11	6.07098e-05	0.216105	0.333	0.065	0.712976	4	cox11
zrsr2	6.12881e-05	0.239762	0.267	0.045	0.719767	4	zrsr2
ccbe11	6.22376e-05	0.211863	0.333	0.065	0.730918	4	ccbe1
rrbp1a	6.38821e-05	0.15319	0.267	0.041	0.750231	4	rrbp1a
hibadhb1	6.41057e-05	0.172278	0.267	0.042	0.752858	4	hibadhb
zgc:153215	6.46235e-05	0.187381	0.2	0.025	0.758938	4	zgc:153215
mych1	6.46589e-05	0.169072	0.2	0.025	0.759355	4	mych
hikeshi	6.66001e-05	0.139857	0.2	0.025	0.782151	4	hikeshi
usp5	6.80774e-05	0.181961	0.2	0.025	0.799501	4	usp5
abcd3a	6.86534e-05	0.220365	0.333	0.066	0.806266	4	abcd3a
rbfox2	6.94435e-05	0.229401	0.4	0.089	0.815544	4	rbfox2
srsf6b	7.06402e-05	0.303213	0.4	0.087	0.829598	4	srsf6b
kansl1b	7.12576e-05	0.228376	0.4	0.089	0.836849	4	kansl1b
nfyba	7.20579e-05	0.257484	0.267	0.043	0.846248	4	nfyba
zgc:174268	7.48609e-05	0.188469	0.267	0.045	0.879166	4	zgc:174268
zgc:165582	7.48838e-05	0.156405	0.2	0.026	0.879436	4	zgc:165582
cpne3	7.48838e-05	0.156405	0.2	0.026	0.879436	4	cpne3
smarca2	7.51324e-05	0.216156	0.4	0.088	0.882355	4	smarca2
emp2	7.66185e-05	0.188469	0.267	0.045	0.899807	4	emp2
si:dkey-34m19.3	7.66185e-05	0.188469	0.267	0.045	0.899807	4	si:dkey-34m19.3
irgq1	7.66188e-05	0.186295	0.267	0.045	0.899811	4	irgq1
hephl1a	7.72489e-05	0.281062	0.4	0.094	0.907211	4	hephl1a
ube2d2	7.98846e-05	0.269956	0.467	0.11	0.938165	4	ube2d2
mpp7a	7.99953e-05	0.151965	0.2	0.026	0.939464	4	mpp7a
FO704779.1	8.17673e-05	0.151965	0.2	0.026	0.960275	4	FO704779.1
znf1035	8.17905e-05	0.248035	0.267	0.043	0.960547	4	znf1035
taok1b	8.2376e-05	0.283126	0.4	0.095	0.967424	4	taok1b
gadd45ba1	8.34648e-05	0.838899	0.8	0.339	0.980211	4	gadd45ba
pdcl	8.7812e-05	0.267156	0.467	0.11	1	4	pdcl
rybpa	8.94025e-05	0.215043	0.333	0.067	1	4	rybpa
ubap2l	9.20606e-05	0.219104	0.4	0.086	1	4	ubap2l
ube2ib	9.28996e-05	0.233746	0.4	0.087	1	4	ube2ib
rbbp5	9.51662e-05	0.189557	0.267	0.046	1	4	rbbp5
med18	9.51662e-05	0.188469	0.267	0.046	1	4	med18
dad11	9.63631e-05	0.349237	0.4	0.088	1	4	dad1
gpsm2	9.95786e-05	0.187381	0.267	0.046	1	4	gpsm2
htra1a	0.000100132	0.169843	0.133	0.013	1	4	htra1a
ormdl2	0.000100745	0.209749	0.333	0.067	1	4	ormdl2
agap1	0.000101854	0.183043	0.267	0.046	1	4	agap1
ebna1bp2	0.000102042	0.244905	0.267	0.045	1	4	ebna1bp2
capza1b1	0.000103085	0.305147	0.4	0.09	1	4	capza1b
hiat1b	0.000105023	0.212922	0.333	0.068	1	4	hiat1b
ywhabb1	0.000105683	0.173642	0.467	0.107	1	4	ywhabb
glrx5	0.000105805	0.21902	0.467	0.11	1	4	glrx5
rap1b	0.000106247	0.158456	0.267	0.043	1	4	rap1b
prr13	0.000106312	0.15319	0.267	0.043	1	4	prr13
npm1a1	0.000106563	0.235386	0.733	0.204	1	4	npm1a
tor4aa	0.000107536	0.215043	0.333	0.068	1	4	tor4aa
snw1	0.000108541	0.201337	0.267	0.045	1	4	snw1
ndufa5	0.000109663	0.266224	0.467	0.112	1	4	ndufa5
map1lc3b1	0.00010968	0.200091	0.4	0.088	1	4	map1lc3b
cox17	0.000110634	0.211863	0.2	0.026	1	4	cox17
BX537308.1	0.000111771	0.112684	0.133	0.013	1	4	BX537308.1
zgc:165515	0.000111771	0.112684	0.133	0.013	1	4	zgc:165515
tmem260	0.000111771	0.112684	0.133	0.013	1	4	tmem260
epb41a	0.000112063	0.155293	0.2	0.027	1	4	epb41a
ifrd1	0.000112972	0.133314	0.2	0.026	1	4	ifrd1
si:ch211-214c7.4	0.000114036	0.111557	0.133	0.013	1	4	si:ch211-214c7.4
CABZ01059408.1	0.000114036	0.111557	0.133	0.013	1	4	CABZ01059408.1
si:dkey-85n7.6	0.000114036	0.111557	0.133	0.013	1	4	si:dkey-85n7.6
dhrs13b	0.000114036	0.111557	0.133	0.013	1	4	dhrs13b
CU467961.1	0.000114462	0.154182	0.2	0.027	1	4	CU467961.1
prmt2	0.000114462	0.154182	0.2	0.027	1	4	prmt2
tap1	0.000114462	0.154182	0.2	0.027	1	4	tap1
ap4s1	0.000114462	0.154182	0.2	0.027	1	4	ap4s1
ndufa11	0.000116299	0.174476	0.333	0.064	1	4	ndufa11
ciita	0.000116343	0.110432	0.133	0.013	1	4	ciita
zbtb16a	0.000116343	0.110432	0.133	0.013	1	4	zbtb16a
ogfrl2	0.000117061	0.195019	0.2	0.027	1	4	ogfrl2
mbd3a	0.000117899	0.126813	0.2	0.026	1	4	mbd3a
tfpt	0.00011869	0.109308	0.133	0.013	1	4	tfpt
nansa	0.000118704	0.159747	0.133	0.013	1	4	nansa
foxk2	0.000118704	0.159747	0.133	0.013	1	4	foxk2
lin54	0.0001194	0.151965	0.2	0.027	1	4	lin54
cyyr1	0.000119719	0.189557	0.267	0.047	1	4	cyyr1
vdac11	0.000119857	0.334236	0.467	0.118	1	4	vdac1
parga	0.000121081	0.158632	0.133	0.013	1	4	parga
ppa1b1	0.000121223	0.236503	0.2	0.027	1	4	ppa1b
chd7	0.000121492	0.311947	0.4	0.092	1	4	chd7
gpia	0.00012351	0.258723	0.4	0.089	1	4	gpia
ntd51	0.000123514	0.105943	0.133	0.013	1	4	ntd5
si:dkey-241l7.2	0.000123532	0.801743	0.133	0.013	1	4	si:dkey-241l7.2
hmgn31	0.000124926	0.186784	0.333	0.066	1	4	hmgn3
harbi1	0.000125145	0.187381	0.267	0.047	1	4	harbi1
map4k5	0.000127167	0.147545	0.2	0.027	1	4	map4k5
wbp1	0.000128509	0.104823	0.133	0.013	1	4	wbp1
rhoac	0.000130112	0.2308	0.4	0.089	1	4	rhoac
si:ch211-212k18.7	0.00013032	0.243627	0.333	0.066	1	4	si:ch211-212k18.7
sbf1	0.000130791	0.18521	0.267	0.047	1	4	sbf1
ska21	0.000132597	0.232174	0.2	0.027	1	4	ska2
smg7	0.000133066	0.166939	0.267	0.046	1	4	smg7
ip6k2a1	0.0001337	0.183043	0.267	0.047	1	4	ip6k2a
si:dkey-33c12.4	0.000134827	0.277026	0.533	0.139	1	4	si:dkey-33c12.4
nol12	0.000136342	0.101473	0.133	0.013	1	4	nol12
tnfrsf191	0.000137428	0.252223	0.333	0.071	1	4	tnfrsf19
pinx1	0.000137803	0.146907	0.267	0.045	1	4	pinx1
myo18ab	0.000137884	0.207639	0.333	0.07	1	4	myo18ab
stam	0.000137885	0.206586	0.333	0.07	1	4	stam
slc25a12	0.000139169	0.188469	0.2	0.027	1	4	slc25a12
rnf19a1	0.000139677	0.277026	0.533	0.139	1	4	rnf19a
lamtor4	0.000140147	0.187381	0.2	0.027	1	4	lamtor4
rhocb	0.000148002	0.18521	0.2	0.027	1	4	rhocb
lin7c	0.000149134	0.175496	0.267	0.047	1	4	lin7c
si:ch73-141c7.11	0.000150802	0.414226	0.667	0.235	1	4	si:ch73-141c7.1
nop16	0.000151143	0.179801	0.2	0.027	1	4	nop16
nomo	0.000153056	0.212922	0.333	0.071	1	4	nomo
eif4ba	0.000153056	0.212922	0.333	0.071	1	4	eif4ba
ptmaa1	0.000153806	0.365616	0.533	0.15	1	4	ptmaa
sephs1	0.00015659	0.209749	0.333	0.071	1	4	sephs1
rapgef2	0.00015816	0.260653	0.333	0.073	1	4	rapgef2
lig3	0.000159152	0.186295	0.267	0.048	1	4	lig3
dexi	0.000162622	0.184126	0.267	0.048	1	4	dexi
taf13	0.000164092	0.211108	0.333	0.067	1	4	taf13
ndufs6	0.000165458	0.220212	0.333	0.067	1	4	ndufs6
ilf3a	0.00016637	0.128976	0.2	0.027	1	4	ilf3a
chst14	0.000166377	0.153073	0.2	0.029	1	4	chst14
lrrc8aa	0.000166377	0.153073	0.2	0.029	1	4	lrrc8aa
zgc:66475	0.000166377	0.151965	0.2	0.029	1	4	zgc:66475
syncrip	0.000167242	0.427034	0.8	0.3	1	4	syncrip
cry2	0.00016891	0.242635	0.467	0.126	1	4	cry2
tmbim4	0.000169763	0.169072	0.267	0.047	1	4	tmbim4
tma7	0.000171534	0.393878	0.533	0.155	1	4	tma7
selenot1b	0.000172619	0.158456	0.267	0.046	1	4	selenot1b
spryd7a	0.000173275	0.150858	0.2	0.029	1	4	spryd7a
tmem199	0.000173275	0.150858	0.2	0.029	1	4	tmem199
eif4g3b	0.000173275	0.150858	0.2	0.029	1	4	eif4g3b
zc3h11a	0.000179172	0.202384	0.267	0.047	1	4	zc3h11a
vps35	0.000180294	0.151091	0.267	0.046	1	4	vps35
tax1bp3	0.00018058	0.192831	0.2	0.029	1	4	tax1bp3
sat1a.21	0.000185642	0.391015	0.667	0.216	1	4	sat1a.2
etnk1	0.000186396	0.22591	0.4	0.092	1	4	etnk1
rc3h1b	0.000192074	0.187381	0.267	0.049	1	4	rc3h1b
tsr2	0.000199101	0.195074	0.267	0.047	1	4	tsr2
urb1	0.000200797	0.168716	0.133	0.014	1	4	urb1
larp4ab	0.000201646	0.328694	0.4	0.096	1	4	larp4ab
zgc:111986	0.000203671	0.414329	0.8	0.306	1	4	zgc:111986
slc30a4	0.000206491	0.166466	0.133	0.014	1	4	slc30a4
uqcr10	0.000206762	0.357503	0.333	0.07	1	4	uqcr10
cbwd	0.00020898	0.181961	0.267	0.049	1	4	cbwd
agrn	0.000209618	0.378436	0.667	0.224	1	4	agrn
rabl2	0.000217002	0.20051	0.2	0.03	1	4	rabl2
cpvl	0.000217096	0.284209	0.2	0.03	1	4	cpvl
cdc42l	0.000222878	0.177353	0.467	0.113	1	4	cdc42l
LO018029.1	0.000224379	0.111557	0.133	0.014	1	4	LO018029.1
clip1a	0.000224379	0.111557	0.133	0.014	1	4	clip1a
dnajc16l	0.000224379	0.111557	0.133	0.014	1	4	dnajc16l
cep89	0.000228586	0.110432	0.133	0.014	1	4	cep89
si:dkey-58f10.10	0.000228586	0.110432	0.133	0.014	1	4	si:dkey-58f10.10
tank	0.000228586	0.110432	0.133	0.014	1	4	tank
dhrs7	0.000228586	0.110432	0.133	0.014	1	4	dhrs7
ube2r2	0.000228586	0.110432	0.133	0.014	1	4	ube2r2
kank1a	0.000228586	0.109308	0.133	0.014	1	4	kank1a
napsa	0.000230534	0.242635	0.4	0.097	1	4	napsa
dock6	0.000232862	0.109308	0.133	0.014	1	4	dock6
pdp2	0.000232862	0.109308	0.133	0.014	1	4	pdp2
pdxka	0.000232862	0.108185	0.133	0.014	1	4	pdxka
usp1	0.000232907	0.159747	0.133	0.014	1	4	usp1
tfg	0.000233729	0.132228	0.2	0.029	1	4	tfg
necap2	0.000236839	0.174422	0.267	0.049	1	4	necap2
fubp3	0.000239769	0.186295	0.267	0.05	1	4	fubp3
lin37	0.000241627	0.107063	0.133	0.014	1	4	lin37
BX470182.1	0.000245195	0.149753	0.2	0.03	1	4	BX470182.1
qdpra	0.000245195	0.148648	0.2	0.03	1	4	qdpra
bud23	0.000245195	0.148648	0.2	0.03	1	4	bud23
ccnl1b	0.000246071	0.156405	0.133	0.014	1	4	ccnl1b
dnajc7	0.000246123	0.155293	0.133	0.014	1	4	dnajc7
mrpl38	0.000247868	0.128976	0.2	0.029	1	4	mrpl38
cbx51	0.000248922	0.248171	0.4	0.094	1	4	cbx5
APBA3	0.000250023	0.147545	0.2	0.03	1	4	APBA3
prpf8	0.000252748	0.127894	0.2	0.029	1	4	prpf8
elovl1b1	0.000252968	0.196115	0.267	0.048	1	4	elovl1b
vegfaa	0.000254934	0.147545	0.2	0.03	1	4	vegfaa
nr3c1	0.000256644	0.310973	0.467	0.137	1	4	nr3c1
cd1641	0.000257414	0.258635	0.333	0.072	1	4	cd164
znf292b	0.000258615	0.231095	0.267	0.051	1	4	znf292b
irf2bpl	0.000258855	0.204483	0.267	0.049	1	4	irf2bpl
pole3	0.000260037	0.102589	0.133	0.014	1	4	pole3
naa40.1	0.000260047	0.101473	0.133	0.014	1	4	naa40.1
hax1	0.000260047	0.101473	0.133	0.014	1	4	hax1
cycsb	0.000262767	0.249126	0.4	0.096	1	4	cycsb
cand1	0.000264829	0.101473	0.133	0.014	1	4	cand1
eif1axa	0.000264841	0.100359	0.133	0.014	1	4	eif1axa
hspb12	0.000265835	0.345485	0.467	0.12	1	4	hspb1
fdps	0.000267977	0.230016	0.267	0.051	1	4	fdps
stat1a	0.000271658	0.448706	0.6	0.201	1	4	stat1a
dnajb1a	0.000274023	0.210806	0.333	0.075	1	4	dnajb1a
wu:fi42e031	0.000274719	0.183043	0.133	0.014	1	4	wu:fi42e03
si:dkey-188i13.10	0.000276378	0.327004	0.467	0.126	1	4	si:dkey-188i13.10
itsn2b	0.000279738	0.226329	0.4	0.102	1	4	itsn2b
si:ch73-236c18.8.1	0.000279989	0.209749	0.333	0.075	1	4	si:ch73-236c18.8.1
sf3b6	0.000281666	0.250923	0.533	0.15	1	4	sf3b6
postnb	0.000282518	0.226167	0.067	0.003	1	4	postnb
selenow11	0.000283874	0.388334	0.6	0.191	1	4	selenow1
vps36	0.000290696	0.186295	0.267	0.051	1	4	vps36
calr3b1	0.000292717	0.216156	0.4	0.102	1	4	calr3b
psmf1	0.000294242	0.172278	0.267	0.05	1	4	psmf1
rtf1	0.000298252	0.137556	0.267	0.048	1	4	rtf1
scocb	0.00029859	0.205534	0.333	0.075	1	4	scocb
tdh1	0.000304388	0.201645	0.867	0.282	1	4	tdh
pcbp2	0.000312407	0.243517	0.6	0.18	1	4	pcbp2
rwdd11	0.000312738	0.203084	0.333	0.071	1	4	rwdd1
u2af2a	0.000313755	0.27773	0.267	0.053	1	4	u2af2a
smap1	0.000316065	0.262676	0.4	0.105	1	4	smap1
psmg3	0.000316509	0.1982	0.267	0.049	1	4	psmg3
cnn2	0.000318774	0.244621	0.333	0.073	1	4	cnn2
trappc2l	0.000318877	0.210806	0.333	0.076	1	4	trappc2l
trip6	0.00032049	0.151965	0.2	0.031	1	4	trip6
rnf111	0.000321539	0.179801	0.267	0.051	1	4	rnf111
si:ch211-51e12.71	0.000336516	0.183692	0.267	0.049	1	4	si:ch211-51e12.7
tram1	0.000339652	0.130058	0.2	0.03	1	4	tram1
gpatch8	0.000345554	0.209795	0.533	0.155	1	4	gpatch8
CU929143.1	0.000346335	0.195074	0.2	0.03	1	4	CU929143.1
rnpc3	0.000348271	0.175496	0.267	0.051	1	4	rnpc3
slc7a6os	0.000352655	0.127894	0.2	0.03	1	4	slc7a6os
cfl2	0.000361896	0.210806	0.333	0.078	1	4	cfl2
odc11	0.000363546	0.319953	0.2	0.031	1	4	odc1
ppp2r5d	0.000363568	0.187381	0.2	0.031	1	4	ppp2r5d
naprt	0.000363644	0.224286	0.4	0.105	1	4	naprt
utrn	0.000368377	0.232174	0.267	0.054	1	4	utrn
si:dkey-25o1.7	0.00037121	0.183043	0.267	0.053	1	4	si:dkey-25o1.7
dap	0.000373718	0.198101	0.333	0.072	1	4	dap
mgat4a	0.000377316	0.20029	0.333	0.076	1	4	mgat4a
bhmt1	0.000378846	0.389497	0.267	0.053	1	4	bhmt
UTP14C	0.000379448	0.138764	0.2	0.031	1	4	UTP14C
eif2ak3	0.000393784	0.179801	0.267	0.053	1	4	eif2ak3
cebpb1	0.000394287	0.344914	0.467	0.124	1	4	cebpb
setd1a	0.000401134	0.13658	0.2	0.031	1	4	setd1a
ddx3xa	0.000404501	0.191957	0.267	0.05	1	4	ddx3xa
DTX4	0.000411308	0.110432	0.133	0.015	1	4	DTX4
sp100.1	0.000411308	0.110432	0.133	0.015	1	4	sp100.1
cyp2p6	0.000411308	0.110432	0.133	0.015	1	4	cyp2p6
tpp1	0.000411308	0.110432	0.133	0.015	1	4	tpp1
CU694481.1	0.000411308	0.110432	0.133	0.015	1	4	CU694481.1
slc43a2b	0.000411308	0.110432	0.133	0.015	1	4	slc43a2b
si:dkey-7n6.2	0.000411308	0.110432	0.133	0.015	1	4	si:dkey-7n6.2
rab11a	0.000411904	0.23764	0.267	0.051	1	4	rab11a
zgc:171506	0.000418479	0.109308	0.133	0.015	1	4	zgc:171506
kaznb	0.000418479	0.109308	0.133	0.015	1	4	kaznb
igsf8	0.000418479	0.108185	0.133	0.015	1	4	igsf8
si:ch211-218g4.2	0.000418479	0.108185	0.133	0.015	1	4	si:ch211-218g4.2
mrpl12	0.000420256	0.252605	0.333	0.075	1	4	mrpl12
aldob1	0.000421973	0.237358	0.8	0.271	1	4	aldob
rexo4	0.000423943	0.131142	0.2	0.031	1	4	rexo4
cldn7a	0.000425269	0.421937	0.667	0.239	1	4	cldn7a
mfsd2ab	0.000425759	0.107063	0.133	0.015	1	4	mfsd2ab
eif3ja	0.00042974	0.198101	0.333	0.073	1	4	eif3ja
ndufb21	0.000430495	0.237805	0.533	0.154	1	4	ndufb2
wdr3	0.000433223	0.156405	0.133	0.015	1	4	wdr3
phb2b1	0.000434129	0.172278	0.267	0.053	1	4	phb2b
zgc:113333	0.000435161	0.150858	0.2	0.032	1	4	zgc:113333
setdb1b	0.000435161	0.150858	0.2	0.032	1	4	setdb1b
uchl3	0.000440656	0.103706	0.133	0.015	1	4	uchl3
ankhd1	0.000440727	0.154182	0.133	0.015	1	4	ankhd1
mrpl54	0.00044096	0.257759	0.4	0.1	1	4	mrpl54
mob3c	0.000442992	0.183043	0.267	0.054	1	4	mob3c
wdr48b	0.000443183	0.149753	0.2	0.032	1	4	wdr48b
cyp2aa1	0.000443183	0.149753	0.2	0.032	1	4	cyp2aa1
ifi45	0.00044415	0.417077	0.333	0.075	1	4	ifi45
rmnd1	0.000444474	0.206586	0.333	0.079	1	4	rmnd1
dhx16	0.000444484	0.154182	0.133	0.015	1	4	dhx16
sash1a	0.000447855	0.128976	0.2	0.031	1	4	sash1a
mgst1.2	0.000448342	0.144243	0.133	0.015	1	4	mgst1.2
lrrc8da	0.000451335	0.148648	0.2	0.032	1	4	lrrc8da
sh3pxd2aa	0.000451335	0.148648	0.2	0.032	1	4	sh3pxd2aa
CU694532.1	0.000451335	0.148648	0.2	0.032	1	4	CU694532.1
SRBD1	0.000451335	0.148648	0.2	0.032	1	4	SRBD1
clasrp	0.000451643	0.181961	0.267	0.054	1	4	clasrp
cdc14ab	0.000451643	0.181961	0.267	0.054	1	4	cdc14ab
tsen34	0.000456008	0.102589	0.133	0.015	1	4	tsen34
snu13b1	0.000456028	0.186784	0.2	0.031	1	4	snu13b
erap1a	0.000460443	0.180881	0.267	0.054	1	4	erap1a
si:dkeyp-27c8.2	0.00046207	0.228939	0.267	0.055	1	4	si:dkeyp-27c8.2
ptpn11a	0.000463745	0.195074	0.333	0.078	1	4	ptpn11a
rprd1b	0.000463859	0.101473	0.133	0.015	1	4	rprd1b
rraga	0.000471828	0.100359	0.133	0.015	1	4	rraga
hmgb3b	0.000478172	0.158297	0.333	0.073	1	4	hmgb3b
pyroxd2	0.000478499	0.177646	0.267	0.054	1	4	pyroxd2
cox5ab1	0.000482009	0.202476	0.467	0.123	1	4	cox5ab
gapdhs	0.000485532	0.340222	0.933	0.393	1	4	gapdhs
mettl16	0.000487756	0.177646	0.267	0.054	1	4	mettl16
pfn2	0.000496075	0.418774	0.667	0.218	1	4	pfn2
zeb2b1	0.00049718	0.172278	0.267	0.054	1	4	zeb2b
myo1cb	0.000510819	0.204483	0.333	0.08	1	4	myo1cb
vcp1	0.000514864	0.2308	0.333	0.075	1	4	vcp
glod5	0.000518072	0.223266	0.4	0.108	1	4	glod5
ctdspla	0.000521469	0.13658	0.2	0.032	1	4	ctdspla
msna	0.000530356	0.424056	0.667	0.261	1	4	msna
hnrpkl	0.000534989	0.208694	0.267	0.054	1	4	hnrpkl
mlx	0.000536495	0.166939	0.267	0.054	1	4	mlx
hnrnpa1b	0.000540769	0.296856	0.533	0.154	1	4	hnrnpa1b
rfxank	0.000545431	0.180881	0.267	0.055	1	4	rfxank
flr	0.00055583	0.179801	0.267	0.055	1	4	flr
prdx6	0.000563036	0.245947	0.6	0.185	1	4	prdx6
spryd7b	0.000566403	0.178723	0.267	0.055	1	4	spryd7b
ube2g1b	0.000570011	0.18885	0.267	0.053	1	4	ube2g1b
ctsh	0.000576112	0.194034	0.333	0.08	1	4	ctsh
nubp2	0.000577152	0.177646	0.267	0.055	1	4	nubp2
march5l	0.000578471	0.168005	0.267	0.054	1	4	march5l
coa3b	0.00057988	0.149753	0.2	0.033	1	4	coa3b
git1	0.000584939	0.204483	0.333	0.081	1	4	git1
mcat.1	0.000590206	0.148648	0.2	0.033	1	4	mcat.1
hmces	0.000590206	0.148648	0.2	0.033	1	4	hmces
ada2a	0.000590206	0.147545	0.2	0.033	1	4	ada2a
arl8a	0.00059053	0.130058	0.2	0.032	1	4	arl8a
wbp2nl1	0.00059157	0.192498	0.467	0.126	1	4	wbp2nl
tab2	0.00059944	0.192995	0.333	0.08	1	4	tab2
grna	0.000600693	0.146443	0.2	0.033	1	4	grna
flna1	0.00060319	0.336726	0.467	0.132	1	4	flna
sh3glb2b	0.000611342	0.146443	0.2	0.033	1	4	sh3glb2b
tmtc2a	0.000611342	0.145343	0.2	0.033	1	4	tmtc2a
nudcd3	0.000611733	0.126813	0.2	0.032	1	4	nudcd3
dab2ipb	0.000612132	0.231095	0.267	0.057	1	4	dab2ipb
actr10	0.000615757	0.187381	0.2	0.033	1	4	actr10
eif5	0.000617076	0.257695	0.6	0.182	1	4	eif5
pgd	0.000618109	0.197157	0.267	0.054	1	4	pgd
CABZ01086029.1	0.000621974	0.172278	0.267	0.055	1	4	CABZ01086029.1
eci1	0.00062551	0.187816	0.267	0.053	1	4	eci1
ctsba1	0.00063683	0.315636	0.333	0.075	1	4	ctsba
bptf	0.000638811	0.202085	0.4	0.107	1	4	bptf
tmed10	0.000639895	0.282315	0.6	0.192	1	4	tmed10
tmem147	0.000643371	0.181637	0.267	0.053	1	4	tmem147
kars	0.000644326	0.154341	0.4	0.099	1	4	kars
zfyve21	0.000644853	0.120355	0.2	0.032	1	4	zfyve21
SCYL2	0.000652696	0.201612	0.2	0.034	1	4	SCYL2
copz1	0.000655337	0.182664	0.267	0.053	1	4	copz1
pdcd4a	0.000655362	0.195209	0.467	0.127	1	4	pdcd4a
aars	0.000656093	0.122503	0.2	0.032	1	4	aars
snrpe1	0.000656277	0.195074	0.2	0.032	1	4	snrpe
irf10	0.000656407	0.20051	0.2	0.034	1	4	irf10
cfl1	0.000657686	0.46078	1	0.425	1	4	cfl1
phf3	0.000661527	0.186784	0.333	0.08	1	4	phf3
tmem106c	0.000667529	0.161982	0.133	0.016	1	4	tmem106c
eif4a3	0.000676722	0.20563	0.4	0.102	1	4	eif4a3
stambpa	0.000680674	0.202384	0.333	0.082	1	4	stambpa
phlpp1	0.000680678	0.20029	0.333	0.082	1	4	phlpp1
ube2v1	0.000684085	0.227434	0.533	0.158	1	4	ube2v1
eaf1	0.00068939	0.159747	0.133	0.016	1	4	eaf1
si:dkey-106g10.7	0.000700196	0.109308	0.133	0.016	1	4	si:dkey-106g10.7
si:ch73-92i20.1.1	0.000700196	0.109308	0.133	0.016	1	4	si:ch73-92i20.1.1
rps6ka4	0.000700196	0.109308	0.133	0.016	1	4	rps6ka4
nrg2a	0.000700196	0.109308	0.133	0.016	1	4	nrg2a
slc35e4	0.000700196	0.109308	0.133	0.016	1	4	slc35e4
eva1c	0.000700196	0.109308	0.133	0.016	1	4	eva1c
atp5po1	0.000705321	0.33781	0.933	0.368	1	4	atp5po
fer	0.000711599	0.108185	0.133	0.016	1	4	fer
CU179756.1	0.000711599	0.108185	0.133	0.016	1	4	CU179756.1
dis3	0.000711599	0.107063	0.133	0.016	1	4	dis3
si:ch211-266k8.4	0.000711599	0.107063	0.133	0.016	1	4	si:ch211-266k8.4
dock8	0.000723163	0.107063	0.133	0.016	1	4	dock8
nab1a	0.000723163	0.107063	0.133	0.016	1	4	nab1a
zgc:158463	0.000731396	0.114699	0.6	0.178	1	4	zgc:158463
si:ch211-204c21.1.1	0.000738112	0.214133	0.4	0.112	1	4	si:ch211-204c21.1.1
tnfsf121	0.000739968	0.126813	0.2	0.033	1	4	tnfsf12
dpp7	0.000751163	0.225307	0.333	0.082	1	4	dpp7
arf2a	0.000751871	0.204083	0.333	0.079	1	4	arf2a
zfand3	0.00075588	0.274896	0.267	0.056	1	4	zfand3
eppk1	0.000758838	0.103706	0.133	0.016	1	4	eppk1
ndrg3b	0.000758886	0.151965	0.133	0.016	1	4	ndrg3b
spata6	0.00075965	0.148648	0.2	0.034	1	4	spata6
abce1	0.000761156	0.172278	0.2	0.033	1	4	abce1
tmem167a	0.000765579	0.169072	0.2	0.033	1	4	tmem167a
ncoa5	0.000765709	0.128976	0.2	0.033	1	4	ncoa5
atp5mea	0.000775376	0.157518	0.733	0.234	1	4	atp5mea
tfam	0.000778892	0.126813	0.2	0.033	1	4	tfam
dnajc11a	0.00077895	0.125734	0.2	0.033	1	4	dnajc11a
scml2	0.000786004	0.146443	0.2	0.034	1	4	scml2
kxd1	0.000786004	0.146443	0.2	0.034	1	4	kxd1
fbxo9	0.000788944	0.199245	0.333	0.083	1	4	fbxo9
gm2a	0.000789504	0.149753	0.133	0.016	1	4	gm2a
spry21	0.000789785	0.13549	0.133	0.016	1	4	spry2
cox7a2a	0.000793151	0.251437	0.4	0.106	1	4	cox7a2a
snrpd21	0.000794022	0.219104	0.333	0.079	1	4	snrpd2
trnau1apb	0.000794629	0.192154	0.333	0.078	1	4	trnau1apb
prkaa1	0.000799477	0.145343	0.2	0.034	1	4	prkaa1
gstk1	0.000800507	0.236606	0.333	0.084	1	4	gstk1
skia	0.000819791	0.196115	0.333	0.083	1	4	skia
parp1	0.000822602	0.174422	0.267	0.057	1	4	parp1
znf217	0.000822602	0.174422	0.267	0.057	1	4	znf217
hnrnpa0a1	0.000823497	0.143364	0.333	0.076	1	4	hnrnpa0a
rab5ab	0.000833592	0.150044	0.267	0.055	1	4	rab5ab
si:dkey-112a7.4	0.000835942	0.138591	0.267	0.054	1	4	si:dkey-112a7.4
slc15a4	0.00083753	0.174422	0.267	0.057	1	4	slc15a4
yipf4	0.000847902	0.121428	0.2	0.033	1	4	yipf4
arl8ba	0.00085541	0.139857	0.2	0.034	1	4	arl8ba
gpat3	0.000855495	0.19941	0.2	0.035	1	4	gpat3
nfkb2	0.000859596	0.155293	0.267	0.056	1	4	nfkb2
mrps2	0.000860568	0.20029	0.333	0.084	1	4	mrps2
mrpl45	0.000860568	0.199245	0.333	0.084	1	4	mrpl45
bsdc1	0.000868451	0.206085	0.4	0.112	1	4	bsdc1
fstl1b1	0.000869923	0.137671	0.2	0.034	1	4	fstl1b
nars	0.000876877	0.119282	0.2	0.033	1	4	nars
smndc1	0.000879786	0.235714	0.333	0.08	1	4	smndc1
baz2a	0.000891722	0.119282	0.2	0.033	1	4	baz2a
mt-nd41	0.000899325	0.483111	1	0.742	1	4	mt-nd4
uqcrb1	0.000900879	0.245137	0.6	0.194	1	4	uqcrb
fkbp1aa	0.000905293	0.267126	0.6	0.188	1	4	fkbp1aa
cox8a	0.000912019	0.380142	0.867	0.408	1	4	cox8a
sbf2	0.000922427	0.177646	0.267	0.058	1	4	sbf2
mier1a	0.000922427	0.177646	0.267	0.058	1	4	mier1a
znf384l	0.000922427	0.177646	0.267	0.058	1	4	znf384l
zzz3	0.000930125	0.133314	0.2	0.034	1	4	zzz3
lama4	0.00093894	0.17657	0.267	0.058	1	4	lama4
ddx511	0.00093894	0.17657	0.267	0.058	1	4	ddx51
htatip2	0.00095797	0.145343	0.333	0.078	1	4	htatip2
cbx8b1	0.00095997	0.197107	0.4	0.112	1	4	cbx8b
ap1s2	0.000969315	0.216282	0.467	0.134	1	4	ap1s2
si:ch211-241e1.5	0.000979768	0.147545	0.2	0.035	1	4	si:ch211-241e1.5
hook1	0.000979768	0.147545	0.2	0.035	1	4	hook1
rgs17	0.000979768	0.147545	0.2	0.035	1	4	rgs17
caap11	0.000986786	0.219298	0.267	0.059	1	4	caap1
nav2b	0.00099004	0.172278	0.267	0.058	1	4	nav2b
tmem259	0.000990042	0.169072	0.267	0.058	1	4	tmem259
polg2	0.000996094	0.146443	0.2	0.035	1	4	polg2
rab10	0.00100163	0.277215	0.4	0.118	1	4	rab10
sdha	0.00100226	0.249604	0.533	0.167	1	4	sdha
h3f3b.1.2	0.00100398	0.269582	0.467	0.135	1	4	h3f3b.1.2
szrd1	0.00100859	0.182664	0.267	0.056	1	4	szrd1
dock4b	0.00101265	0.145343	0.2	0.035	1	4	dock4b
wee1	0.00101265	0.145343	0.2	0.035	1	4	wee1
pold3	0.00101265	0.145343	0.2	0.035	1	4	pold3
setd6	0.00101265	0.144243	0.2	0.035	1	4	setd6
pdpk1b	0.00102545	0.168005	0.267	0.058	1	4	pdpk1b
tgm2b	0.00102945	0.144243	0.2	0.035	1	4	tgm2b
polr2b	0.00104233	0.228939	0.2	0.035	1	4	polr2b
isg20	0.0010465	0.140952	0.2	0.035	1	4	isg20
med11	0.00104935	0.166939	0.2	0.034	1	4	med11
dph6	0.0010529	0.224643	0.267	0.061	1	4	dph6
arpc2	0.00105971	0.370381	0.667	0.261	1	4	arpc2
si:ch211-85n16.3	0.00106182	0.218182	0.4	0.118	1	4	si:ch211-85n16.3
glud1b	0.0010792	0.121428	0.2	0.034	1	4	glud1b
cgrrf1	0.0010809	0.248505	0.2	0.037	1	4	cgrrf1
capn2a	0.00108131	0.139857	0.2	0.035	1	4	capn2a
crk	0.00108247	0.180881	0.2	0.035	1	4	crk
ctcf	0.00109959	0.16375	0.267	0.058	1	4	ctcf
smad7	0.00110144	0.213124	0.333	0.086	1	4	smad7
rbpja	0.00110456	0.175496	0.267	0.059	1	4	rbpja
chmp4bb	0.00111139	0.20029	0.267	0.058	1	4	chmp4bb
tspan18b1	0.00111366	0.20382	0.133	0.017	1	4	tspan18b
ndufa6	0.00111392	0.243344	0.667	0.229	1	4	ndufa6
ndor1	0.00112139	0.108185	0.133	0.017	1	4	ndor1
dmd	0.00112139	0.108185	0.133	0.017	1	4	dmd
foxo3a	0.00112139	0.108185	0.133	0.017	1	4	foxo3a
dock1	0.00112139	0.108185	0.133	0.017	1	4	dock1
appbp2	0.00112139	0.108185	0.133	0.017	1	4	appbp2
telo2	0.00112139	0.108185	0.133	0.017	1	4	telo2
bzw1b1	0.00112984	0.304513	0.4	0.106	1	4	bzw1b
mrpl2	0.00113351	0.115004	0.2	0.034	1	4	mrpl2
pias1b	0.00113852	0.107063	0.133	0.017	1	4	pias1b
tbc1d24	0.00113852	0.107063	0.133	0.017	1	4	tbc1d24
ccser2a	0.00114352	0.171208	0.267	0.059	1	4	ccser2a
naa35	0.00116343	0.172278	0.267	0.059	1	4	naa35
fkbp2	0.00116462	0.23396	0.4	0.11	1	4	fkbp2
ptgr1	0.00117094	0.113938	0.2	0.034	1	4	ptgr1
zgc:173587	0.00117345	0.102589	0.133	0.017	1	4	zgc:173587
aldocb	0.00122504	0.166939	0.267	0.059	1	4	aldocb
si:ch211-198a12.6	0.00124253	0.132399	0.267	0.056	1	4	si:ch211-198a12.6
nrm	0.00124578	0.146443	0.2	0.037	1	4	nrm
snrpd1	0.00126468	0.230427	0.2	0.035	1	4	snrpd1
stat5a	0.00126589	0.145343	0.2	0.037	1	4	stat5a
sil1	0.00126589	0.145343	0.2	0.037	1	4	sil1
skiv2l	0.00126589	0.145343	0.2	0.037	1	4	skiv2l
mcm21	0.00128385	0.137671	0.133	0.017	1	4	mcm2
atp6v1aa	0.00128627	0.144243	0.2	0.037	1	4	atp6v1aa
lman2lb	0.00128627	0.144243	0.2	0.037	1	4	lman2lb
rab5b	0.00128627	0.144243	0.2	0.037	1	4	rab5b
lrrc1	0.00128627	0.144243	0.2	0.037	1	4	lrrc1
si:ch1073-291c23.2	0.00129154	0.124656	0.2	0.035	1	4	si:ch1073-291c23.2
CU929037.2	0.0012921	0.17335	0.267	0.061	1	4	CU929037.2
atp5mc11	0.00129427	0.343702	0.4	0.113	1	4	atp5mc1
brd2b	0.00130694	0.143145	0.2	0.037	1	4	brd2b
zbtb8os	0.00131161	0.159512	0.267	0.059	1	4	zbtb8os
si:dkey-42i9.4	0.00131164	0.213236	0.6	0.196	1	4	si:dkey-42i9.4
cwc25	0.00131243	0.119282	0.2	0.035	1	4	cwc25
fblim1	0.0013279	0.142048	0.2	0.037	1	4	fblim1
si:ch211-195e19.1	0.00133676	0.172278	0.267	0.061	1	4	si:ch211-195e19.1
ccnb1	0.00134255	0.170139	0.133	0.017	1	4	ccnb1
kmt5aa	0.00135302	0.277974	0.267	0.061	1	4	kmt5aa
xpnpep1	0.0013596	0.166939	0.267	0.061	1	4	xpnpep1
myh11a	0.00136278	0.283126	0.067	0.005	1	4	myh11a
mylk4b	0.00136278	0.120607	0.067	0.005	1	4	mylk4b
efna1a	0.00136278	0.120607	0.067	0.005	1	4	efna1a
fn1b	0.00136281	0.230697	0.067	0.005	1	4	fn1b
jak2b	0.00137069	0.137671	0.2	0.037	1	4	jak2b
arf5	0.00137647	0.181077	0.4	0.11	1	4	arf5
rgs5a	0.00138142	0.119472	0.067	0.005	1	4	rgs5a
atox1	0.00139135	0.184722	0.267	0.058	1	4	atox1
cratb	0.00139251	0.138764	0.2	0.037	1	4	cratb
rnd3a1	0.00139252	0.137671	0.2	0.037	1	4	rnd3a
u2af2b	0.00140308	0.263324	0.467	0.144	1	4	u2af2b
ino80c	0.00140569	0.225307	0.267	0.059	1	4	ino80c
rbm39a	0.00141133	0.134599	0.467	0.132	1	4	rbm39a
si:ch211-288g17.31	0.0014151	0.143544	0.4	0.107	1	4	si:ch211-288g17.3
hmbsa	0.00141934	0.117204	0.067	0.005	1	4	hmbsa
borcs7	0.00141934	0.117204	0.067	0.005	1	4	borcs7
nudcd1	0.00141934	0.117204	0.067	0.005	1	4	nudcd1
chac11	0.00142124	0.244251	0.667	0.221	1	4	chac1
elmo1	0.00143863	0.116072	0.067	0.005	1	4	elmo1
rad1	0.00143863	0.116072	0.067	0.005	1	4	rad1
zgc:114200	0.00143863	0.116072	0.067	0.005	1	4	zgc:114200
picalma	0.00143863	0.116072	0.067	0.005	1	4	picalma
clns1a	0.00143869	0.116072	0.067	0.005	1	4	clns1a
hdac1	0.00145211	0.171953	0.467	0.135	1	4	hdac1
zfr	0.00145316	0.174422	0.2	0.037	1	4	zfr
nup107	0.00145824	0.114942	0.067	0.005	1	4	nup107
PPP2CA	0.00145824	0.114942	0.067	0.005	1	4	PPP2CA
myl9b1	0.00145871	0.220325	0.533	0.172	1	4	myl9b
srsf7a1	0.00147204	0.206129	0.333	0.082	1	4	srsf7a
avd	0.00147808	0.110432	0.067	0.005	1	4	avd
pbxip1a	0.00147884	0.241785	0.333	0.092	1	4	pbxip1a
dkc11	0.00149015	0.309999	0.333	0.089	1	4	dkc1
si:dkeyp-46h3.8	0.00149815	0.111557	0.067	0.005	1	4	si:dkeyp-46h3.8
lrp1aa	0.0015032	0.220074	0.333	0.087	1	4	lrp1aa
atg16l1	0.00150344	0.17335	0.267	0.062	1	4	atg16l1
exosc10	0.00150345	0.172278	0.267	0.062	1	4	exosc10
CABZ01115113.1	0.00151313	0.110745	0.2	0.035	1	4	CABZ01115113.1
vat11	0.00151491	0.203433	0.2	0.037	1	4	vat1
psmb6	0.00153062	0.215397	0.467	0.14	1	4	psmb6
naa38	0.00153655	0.108621	0.2	0.035	1	4	naa38
psma31	0.00153702	0.171953	0.467	0.135	1	4	psma3
serpine1	0.00154402	0.594548	0.2	0.038	1	4	serpine1
ftr67	0.00155439	0.170139	0.267	0.062	1	4	ftr67
nop101	0.00155552	0.294129	0.467	0.148	1	4	nop10
ppp2cb	0.00156253	0.208694	0.533	0.168	1	4	ppp2cb
nsmaf	0.00156344	0.145343	0.2	0.038	1	4	nsmaf
FO744833.2	0.00158078	0.158456	0.267	0.061	1	4	FO744833.2
coasy	0.0015879	0.144243	0.2	0.038	1	4	coasy
tubb4b1	0.00161237	0.443379	0.8	0.305	1	4	tubb4b
n4bp2l2	0.00161269	0.143145	0.2	0.038	1	4	n4bp2l2
pkmyt1	0.00163362	0.164812	0.267	0.062	1	4	pkmyt1
pdxdc1	0.00163781	0.142048	0.2	0.038	1	4	pdxdc1
fam222bb	0.00163781	0.142048	0.2	0.038	1	4	fam222bb
mpi	0.00163781	0.142048	0.2	0.038	1	4	mpi
smurf2	0.00163781	0.140952	0.2	0.038	1	4	smurf2
si:ch211-113e8.10	0.00163781	0.140952	0.2	0.038	1	4	si:ch211-113e8.10
cbx1a	0.00168994	0.220212	0.267	0.061	1	4	cbx1a
lsm6	0.00170554	0.108621	0.2	0.037	1	4	lsm6
tprg1	0.0017067	0.107063	0.133	0.018	1	4	tprg1
egln3	0.0017067	0.107063	0.133	0.018	1	4	egln3
abcb10	0.0017067	0.107063	0.133	0.018	1	4	abcb10
setd1ba	0.0017067	0.107063	0.133	0.018	1	4	setd1ba
pdcd2l	0.0017067	0.107063	0.133	0.018	1	4	pdcd2l
sorl1	0.00170953	0.236606	0.333	0.094	1	4	sorl1
prrc2a	0.00171677	0.15214	0.267	0.061	1	4	prrc2a
BX640537.3	0.00173123	0.105943	0.133	0.018	1	4	BX640537.3
add3a1	0.00174688	0.204833	0.467	0.142	1	4	add3a
rgs12b	0.00175606	0.104823	0.133	0.018	1	4	rgs12b
tns1b	0.00176923	0.171208	0.267	0.063	1	4	tns1b
maea	0.00178119	0.103706	0.133	0.018	1	4	maea
supt5h	0.00179835	0.170139	0.267	0.063	1	4	supt5h
nr2c2	0.00179835	0.169072	0.267	0.063	1	4	nr2c2
ppm1da	0.00179835	0.168005	0.267	0.063	1	4	ppm1da
acsm3	0.00180663	0.102589	0.133	0.018	1	4	acsm3
efnb2a	0.00180664	0.101473	0.133	0.018	1	4	efnb2a
arg2	0.00180664	0.100359	0.133	0.018	1	4	arg2
stim1a	0.00183237	0.101473	0.133	0.018	1	4	stim1a
nucb2b	0.00183239	0.100359	0.133	0.018	1	4	nucb2b
cnot3a	0.00185053	0.233512	0.333	0.094	1	4	cnot3a
med23	0.00185782	0.168005	0.267	0.063	1	4	med23
ncoa3	0.00185782	0.168005	0.267	0.063	1	4	ncoa3
eif4e3	0.00185843	0.100359	0.133	0.018	1	4	eif4e3
mrpl17	0.00185846	0.147545	0.133	0.018	1	4	mrpl17
nop56	0.00186622	0.206196	0.6	0.203	1	4	nop56
mta3	0.00186945	0.109682	0.2	0.037	1	4	mta3
psmb4	0.00187025	0.180367	0.333	0.084	1	4	psmb4
grpel1	0.00188546	0.187381	0.2	0.039	1	4	grpel1
bri3	0.00189271	0.15319	0.267	0.062	1	4	bri3
morc2	0.00189806	0.145343	0.133	0.018	1	4	morc2
hvcn1	0.00192601	0.155293	0.333	0.086	1	4	hvcn1
nat9	0.00193725	0.126813	0.2	0.038	1	4	nat9
rassf2a	0.00193863	0.144243	0.2	0.039	1	4	rassf2a
tuba8l41	0.00195003	0.33203	0.8	0.299	1	4	tuba8l4
znf318	0.00195025	0.162689	0.267	0.063	1	4	znf318
mvp	0.00198647	0.151091	0.267	0.062	1	4	mvp
lef1	0.00199786	0.142048	0.2	0.039	1	4	lef1
itga5	0.00199786	0.142048	0.2	0.039	1	4	itga5
ppp4r2a	0.00202805	0.140952	0.2	0.039	1	4	ppp4r2a
zgc:114174	0.00202805	0.140952	0.2	0.039	1	4	zgc:114174
hgs	0.00203775	0.169072	0.267	0.064	1	4	hgs
bbip1	0.00204659	0.162689	0.2	0.038	1	4	bbip1
polr2k1	0.00205614	0.16375	0.2	0.038	1	4	polr2k
micos13	0.00205707	0.124656	0.2	0.038	1	4	micos13
rnf115	0.00205863	0.139857	0.2	0.039	1	4	rnf115
si:dkeyp-33b5.4	0.00206834	0.195019	0.2	0.04	1	4	si:dkeyp-33b5.4
lrp10	0.00207841	0.193924	0.2	0.04	1	4	lrp10
arcn1a	0.00208961	0.138764	0.2	0.039	1	4	arcn1a
cmbl	0.00209197	0.144155	0.6	0.194	1	4	cmbl
pycr1a	0.00210584	0.220365	0.267	0.066	1	4	pycr1a
olfml3b1	0.00212099	0.13658	0.2	0.039	1	4	olfml3b
ctnnd1	0.00212199	0.179213	0.4	0.113	1	4	ctnnd1
ctsd	0.00212699	0.307085	0.333	0.094	1	4	ctsd
sumo2b1	0.00213288	0.208537	0.6	0.207	1	4	sumo2b
crim1	0.00213928	0.219298	0.267	0.066	1	4	crim1
hsdl2	0.00215133	0.156346	0.2	0.038	1	4	hsdl2
dbpb1	0.00217077	0.184408	0.533	0.184	1	4	dbpb
cdk9	0.00219513	0.209749	0.267	0.065	1	4	cdk9
si:ch73-109d9.2	0.00221756	0.132228	0.2	0.039	1	4	si:ch73-109d9.2
azi2	0.0022199	0.163101	0.133	0.019	1	4	azi2
afdna	0.00222821	0.172278	0.267	0.065	1	4	afdna
rab14	0.00225592	0.172584	0.333	0.087	1	4	rab14
bccip	0.0022638	0.131932	0.467	0.138	1	4	bccip
uqcrfs1	0.00230087	0.222145	0.733	0.271	1	4	uqcrfs1
ogdha	0.00234103	0.13451	0.333	0.087	1	4	ogdha
nccrp1	0.00234127	0.169072	0.2	0.039	1	4	nccrp1
zdhhc4	0.00235971	0.202716	0.133	0.019	1	4	zdhhc4
srsf1a1	0.00236265	0.205534	0.2	0.039	1	4	srsf1a
ndufaf5	0.00237333	0.168005	0.267	0.065	1	4	ndufaf5
ndufb4	0.00237721	0.242304	0.667	0.242	1	4	ndufb4
src	0.00237734	0.143145	0.2	0.04	1	4	src
si:busm1-266f07.21	0.00238469	0.439524	0.2	0.04	1	4	si:busm1-266f07.2
rnaset2	0.00238669	0.207088	0.4	0.128	1	4	rnaset2
uprt	0.00238796	0.1574	0.267	0.064	1	4	uprt
trappc1	0.0023991	0.16057	0.2	0.039	1	4	trappc1
aff4	0.00241238	0.142048	0.2	0.04	1	4	aff4
PLEKHH3	0.00242362	0.183692	0.333	0.094	1	4	PLEKHH3
cdc26	0.00243414	0.164812	0.2	0.039	1	4	cdc26
znf1009	0.00244785	0.140952	0.2	0.04	1	4	znf1009
nudt5	0.00244889	0.16375	0.267	0.065	1	4	nudt5
glrx3	0.00245819	0.16057	0.2	0.039	1	4	glrx3
smc6	0.00248814	0.105943	0.133	0.019	1	4	smc6
ric8a	0.00248814	0.105943	0.133	0.019	1	4	ric8a
tomm70a	0.0025178	0.203084	0.4	0.128	1	4	tomm70a
hnrnpk	0.00251825	0.166787	0.333	0.087	1	4	hnrnpk
phc2b	0.00252013	0.137671	0.2	0.04	1	4	phc2b
agtr2	0.0025219	0.104823	0.133	0.019	1	4	agtr2
cabin1	0.0025219	0.104823	0.133	0.019	1	4	cabin1
si:dkey-89b17.4	0.0025219	0.104823	0.133	0.019	1	4	si:dkey-89b17.4
stt3a	0.0025219	0.104823	0.133	0.019	1	4	stt3a
birc2	0.00255447	0.161629	0.2	0.039	1	4	birc2
gfm2	0.00255604	0.103706	0.133	0.019	1	4	gfm2
gnpnat1	0.00255604	0.103706	0.133	0.019	1	4	gnpnat1
zbtb8a	0.00255604	0.103706	0.133	0.019	1	4	zbtb8a
tbrg1	0.00255604	0.103706	0.133	0.019	1	4	tbrg1
eef1e1	0.00255604	0.103706	0.133	0.019	1	4	eef1e1
BX322574.1	0.00255604	0.102589	0.133	0.019	1	4	BX322574.1
rragca	0.00255604	0.102589	0.133	0.019	1	4	rragca
ptrh2	0.00255604	0.102589	0.133	0.019	1	4	ptrh2
wu:fb59d01	0.00255604	0.101473	0.133	0.019	1	4	wu:fb59d01
nprl3	0.00255694	0.137671	0.2	0.04	1	4	nprl3
si:ch211-221j21.3	0.00255694	0.137671	0.2	0.04	1	4	si:ch211-221j21.3
golga5	0.00255695	0.13549	0.2	0.04	1	4	golga5
plscr3b	0.00259151	0.146443	0.133	0.019	1	4	plscr3b
acin1a	0.00261	0.181141	0.733	0.259	1	4	acin1a
cul3a	0.00263379	0.176517	0.333	0.094	1	4	cul3a
snx12	0.00264359	0.145343	0.333	0.088	1	4	snx12
nxf1	0.00267013	0.134402	0.2	0.04	1	4	nxf1
cat	0.00267913	0.144243	0.133	0.019	1	4	cat
uqcrq	0.0026799	0.283126	0.4	0.124	1	4	uqcrq
atpaf1	0.00270224	0.196115	0.4	0.128	1	4	atpaf1
gpn1	0.00270847	0.165875	0.267	0.066	1	4	gpn1
mon2	0.00270847	0.165875	0.267	0.066	1	4	mon2
ndufs4	0.00271584	0.138591	0.267	0.063	1	4	ndufs4
rogdi	0.00272545	0.170407	0.267	0.063	1	4	rogdi
brd4	0.00273226	0.144243	0.133	0.019	1	4	brd4
gabarapl21	0.00275722	0.177353	0.4	0.116	1	4	gabarapl2
rbbp4	0.00278712	0.143145	0.133	0.019	1	4	rbbp4
foxl2a	0.00279309	0.162689	0.267	0.066	1	4	foxl2a
psmb2	0.00282011	0.188333	0.467	0.15	1	4	psmb2
btg3	0.0028324	0.162317	0.267	0.063	1	4	btg3
mrpl30	0.00285347	0.117085	0.267	0.062	1	4	mrpl30
glud1a1	0.0028826	0.168005	0.2	0.04	1	4	glud1a
fitm2	0.00292694	0.140952	0.2	0.041	1	4	fitm2
ralba	0.00296875	0.139857	0.2	0.041	1	4	ralba
cant1a	0.00298617	0.168005	0.267	0.067	1	4	cant1a
il11ra	0.00298617	0.168005	0.267	0.067	1	4	il11ra
alkbh3	0.00298617	0.166939	0.267	0.067	1	4	alkbh3
zp3a.1	0.00299797	0.370468	0.133	0.019	1	4	zp3a.1
lgi1a	0.00301107	0.13658	0.2	0.041	1	4	lgi1a
selenot1a	0.00304319	0.215236	0.333	0.092	1	4	selenot1a
srsf2a	0.00308458	0.204674	0.267	0.063	1	4	srsf2a
creb3l2	0.00308992	0.199245	0.267	0.067	1	4	creb3l2
bcat2	0.00309408	0.1574	0.2	0.04	1	4	bcat2
CU694197.1	0.00309511	0.178415	0.333	0.09	1	4	CU694197.1
ndufv3	0.00311708	0.126245	0.267	0.063	1	4	ndufv3
si:ch211-12h2.8	0.0031184	0.180611	0.133	0.019	1	4	si:ch211-12h2.8
atp5f1b1	0.00314259	0.396889	0.933	0.427	1	4	atp5f1b
rpl26	0.00315642	0.172477	0.667	0.236	1	4	rpl26
tusc2b	0.00318551	0.132228	0.2	0.041	1	4	tusc2b
atp5pb1	0.00320777	0.290186	0.8	0.316	1	4	atp5pb
atg131	0.0032107	0.224286	0.267	0.067	1	4	atg13
coa3a	0.00321725	0.208694	0.2	0.041	1	4	coa3a
hmgb2b1	0.00321791	0.225874	0.4	0.121	1	4	hmgb2b
maf1	0.00323041	0.132228	0.2	0.041	1	4	maf1
arhgef12a	0.00323043	0.130058	0.2	0.041	1	4	arhgef12a
phb1	0.00327737	0.201088	0.267	0.065	1	4	phb
echs11	0.00328697	0.215702	0.667	0.25	1	4	echs1
mt-cyb1	0.00332227	0.262563	1	0.995	1	4	mt-cyb
nr1d2b	0.00337327	0.224935	0.4	0.132	1	4	nr1d2b
ndufs8a	0.00340498	0.174568	0.4	0.12	1	4	ndufs8a
dedd1	0.00341503	0.126123	0.6	0.204	1	4	dedd1
tomm71	0.00346184	0.214271	0.333	0.094	1	4	tomm7
ube2q2	0.0034632	0.125734	0.2	0.041	1	4	ube2q2
mkrn1	0.00346564	0.161311	0.333	0.096	1	4	mkrn1
traf7	0.0034695	0.140952	0.2	0.042	1	4	traf7
FOXK2	0.00349164	0.109682	0.2	0.04	1	4	FOXK2
znf1001.2	0.00349688	0.104823	0.133	0.021	1	4	znf1001.2
apol1	0.00349688	0.104823	0.133	0.021	1	4	apol1
tmed1b	0.00349688	0.104823	0.133	0.021	1	4	tmed1b
ddhd1a	0.00349688	0.104823	0.133	0.021	1	4	ddhd1a
ddb1	0.00349688	0.104823	0.133	0.021	1	4	ddb1
si:dkey-210j14.4	0.00351779	0.139857	0.2	0.042	1	4	si:dkey-210j14.4
BX548015.2	0.00351779	0.139857	0.2	0.042	1	4	BX548015.2
zgc:123305	0.0035418	0.103706	0.133	0.021	1	4	zgc:123305
si:ch73-269m14.3	0.0035418	0.103706	0.133	0.021	1	4	si:ch73-269m14.3
slc12a7b	0.0035418	0.103706	0.133	0.021	1	4	slc12a7b
srsf3b1	0.00354748	0.247071	0.467	0.161	1	4	srsf3b
top3b	0.0035872	0.102589	0.133	0.021	1	4	top3b
mitd1	0.0035872	0.102589	0.133	0.021	1	4	mitd1
nus1	0.0035872	0.102589	0.133	0.021	1	4	nus1
itpkca	0.0035872	0.101473	0.133	0.021	1	4	itpkca
gab1	0.00358948	0.161629	0.267	0.068	1	4	gab1
tma16	0.00363308	0.101473	0.133	0.021	1	4	tma16
stk19	0.00363308	0.100359	0.133	0.021	1	4	stk19
ccdc115	0.00363308	0.100359	0.133	0.021	1	4	ccdc115
rnf40	0.00366037	0.182664	0.333	0.099	1	4	rnf40
ahcyl2	0.00366607	0.13658	0.2	0.042	1	4	ahcyl2
dcp2	0.00367402	0.177538	0.333	0.098	1	4	dcp2
atp5meb	0.00370078	0.229563	0.933	0.388	1	4	atp5meb
ppp1caa	0.00371005	0.158456	0.2	0.041	1	4	ppp1caa
ptpa	0.00371666	0.133314	0.2	0.042	1	4	ptpa
acsl4a	0.00371864	0.181637	0.333	0.099	1	4	acsl4a
sdad1	0.00372631	0.146443	0.133	0.021	1	4	sdad1
akap131	0.00374545	0.126245	0.267	0.065	1	4	akap13
rmnd5b	0.00375005	0.145343	0.133	0.021	1	4	rmnd5b
tada2a	0.00376781	0.134402	0.2	0.042	1	4	tada2a
usp36	0.00376892	0.218094	0.467	0.169	1	4	usp36
si:ch211-132p1.31	0.00381392	0.435385	0.267	0.07	1	4	si:ch211-132p1.3
sdhb1	0.00384478	0.213307	0.333	0.096	1	4	sdhb
nbr1a	0.00387271	0.16375	0.267	0.07	1	4	nbr1a
srsf9	0.00388325	0.111024	0.267	0.064	1	4	srsf9
calr3a1	0.00392909	0.158297	0.267	0.066	1	4	calr3a
aldh9a1a.1	0.00393391	0.147178	0.667	0.237	1	4	aldh9a1a.1
dnajc30b	0.00404597	0.16057	0.267	0.07	1	4	dnajc30b
CABZ01058650.1	0.00413214	0.117204	0.067	0.006	1	4	CABZ01058650.1
mhc2b	0.00413216	0.169843	0.067	0.006	1	4	mhc2b
ifi35	0.00416506	0.159512	0.267	0.07	1	4	ifi35
rnf213a	0.00417033	0.206586	0.467	0.158	1	4	rnf213a
smim4	0.004179	0.116072	0.067	0.006	1	4	smim4
cpt2	0.00419096	0.138764	0.2	0.043	1	4	cpt2
vps13a	0.00419096	0.138764	0.2	0.043	1	4	vps13a
hk1	0.00419096	0.138764	0.2	0.043	1	4	hk1
tmem201	0.00419096	0.138764	0.2	0.043	1	4	tmem201
ppp2r2d1	0.00421415	0.170407	0.333	0.099	1	4	ppp2r2d
itpa	0.00422629	0.114942	0.067	0.006	1	4	itpa
ppp1cab	0.00422629	0.114942	0.067	0.006	1	4	ppp1cab
noc4l	0.00422629	0.114942	0.067	0.006	1	4	noc4l
cdc20	0.00422641	0.165343	0.067	0.006	1	4	cdc20
slc1a5	0.00422921	0.165875	0.267	0.071	1	4	slc1a5
gabarapa1	0.00424169	0.170407	0.667	0.247	1	4	gabarapa
zgc:66443	0.00427402	0.113812	0.067	0.006	1	4	zgc:66443
st3gal5	0.00427402	0.113812	0.067	0.006	1	4	st3gal5
herpud1	0.00427402	0.113812	0.067	0.006	1	4	herpud1
rfc4	0.00427402	0.113812	0.067	0.006	1	4	rfc4
gnl1	0.00430483	0.13658	0.2	0.043	1	4	gnl1
ppil4	0.00430484	0.13549	0.2	0.043	1	4	ppil4
tmed5	0.00432248	0.112684	0.067	0.006	1	4	tmed5
utp23	0.00432248	0.112684	0.067	0.006	1	4	utp23
cab39l	0.00433149	0.174422	0.2	0.043	1	4	cab39l
raf1a	0.00435293	0.162689	0.267	0.071	1	4	raf1a
gnb1b	0.0043682	0.263506	0.933	0.411	1	4	gnb1b
orc6	0.00437139	0.111557	0.067	0.006	1	4	orc6
h3f3b.1.11	0.00438654	0.293219	0.867	0.416	1	4	h3f3b.1.1
ndufab1a1	0.00438893	0.118961	0.333	0.091	1	4	ndufab1a
jpt2	0.00439891	0.11405	0.267	0.065	1	4	jpt2
prnprs3	0.00441592	0.161629	0.267	0.071	1	4	prnprs3
pfn2l	0.00445965	0.182811	0.667	0.248	1	4	pfn2l
hbs1l	0.00447967	0.161629	0.267	0.071	1	4	hbs1l
uqcrh	0.00452924	0.210101	0.733	0.288	1	4	uqcrh
mrpl43	0.00456836	0.153073	0.133	0.022	1	4	mrpl43
dda1	0.00460922	0.154241	0.2	0.042	1	4	dda1
tsr3	0.00467181	0.145864	0.267	0.07	1	4	tsr3
aamp	0.00467251	0.115111	0.333	0.092	1	4	aamp
znf609b1	0.0046854	0.174524	0.4	0.132	1	4	znf609b
echdc2	0.00469124	0.179801	0.2	0.045	1	4	echdc2
cnbpa	0.00473863	0.133983	0.667	0.239	1	4	cnbpa
si:dkey-199f5.8	0.00474257	0.155293	0.267	0.071	1	4	si:dkey-199f5.8
gtf2h2	0.00476237	0.103706	0.133	0.022	1	4	gtf2h2
rfk	0.00476237	0.103706	0.133	0.022	1	4	rfk
sipa1l3	0.00476237	0.103706	0.133	0.022	1	4	sipa1l3
si:dkey-31c13.1	0.00476237	0.103706	0.133	0.022	1	4	si:dkey-31c13.1
ssuh2rs1	0.00480734	0.161629	0.267	0.072	1	4	ssuh2rs1
calm3a	0.00481197	0.145343	0.4	0.123	1	4	calm3a
si:ch1073-224n8.1	0.00482043	0.102589	0.133	0.022	1	4	si:ch1073-224n8.1
plekho1b	0.00482043	0.102589	0.133	0.022	1	4	plekho1b
eif2ak2	0.00482043	0.102589	0.133	0.022	1	4	eif2ak2
bbs2	0.00482043	0.102589	0.133	0.022	1	4	bbs2
ovca2	0.00482043	0.102589	0.133	0.022	1	4	ovca2
kat5a	0.00487586	0.162689	0.267	0.072	1	4	kat5a
vgll4b	0.00487586	0.162689	0.267	0.072	1	4	vgll4b
trmt10b	0.00487906	0.101473	0.133	0.022	1	4	trmt10b
brf1a	0.00487906	0.101473	0.133	0.022	1	4	brf1a
ranbp9	0.00488103	0.179586	0.267	0.07	1	4	ranbp9
cdv3	0.00489065	0.119113	0.267	0.066	1	4	cdv3
mycbp	0.00489198	0.115061	0.267	0.066	1	4	mycbp
seta1	0.00490804	0.132936	0.4	0.122	1	4	seta
mapk3	0.00493554	0.165875	0.2	0.043	1	4	mapk3
naf1	0.00493829	0.100359	0.133	0.022	1	4	naf1
smg6	0.00499964	0.144243	0.133	0.022	1	4	smg6
slc12a7a	0.00501748	0.13658	0.2	0.045	1	4	slc12a7a
mt-co11	0.00502929	0.193006	1	1	1	4	mt-co1
notch2	0.00505399	0.204083	0.267	0.07	1	4	notch2
dnajc1	0.00510741	0.168378	0.267	0.068	1	4	dnajc1
khdrbs1a1	0.00511966	0.261492	0.867	0.356	1	4	khdrbs1a
CR848667.1	0.00514986	0.134402	0.2	0.045	1	4	CR848667.1
pomt2	0.00514986	0.134402	0.2	0.045	1	4	pomt2
eif4e1c	0.00515047	0.142048	0.133	0.022	1	4	eif4e1c
MPRIP	0.00516129	0.145864	0.267	0.071	1	4	MPRIP
bckdha	0.00525141	0.252605	0.267	0.072	1	4	bckdha
hint2	0.00530295	0.138591	0.267	0.07	1	4	hint2
brd3b	0.00531857	0.191391	0.333	0.097	1	4	brd3b
fam3c	0.00534102	0.175496	0.333	0.104	1	4	fam3c
nono	0.00534796	0.119113	0.267	0.067	1	4	nono
cbr4	0.00534962	0.210806	0.267	0.075	1	4	cbr4
si:ch73-160p18.31	0.00539959	0.243032	0.2	0.042	1	4	si:ch73-160p18.3
ube2e3	0.0054397	0.141317	0.667	0.248	1	4	ube2e3
si:dkey-19b23.11	0.00553203	0.282094	0.133	0.022	1	4	si:dkey-19b23.11
acox1	0.00567463	0.156346	0.267	0.073	1	4	acox1
si:dkey-6n21.12	0.00567463	0.154241	0.267	0.073	1	4	si:dkey-6n21.12
rab5c	0.0057389	0.108621	0.2	0.043	1	4	rab5c
jkamp	0.0057534	0.156346	0.267	0.073	1	4	jkamp
si:ch1073-322p19.1	0.00577439	0.212115	0.333	0.107	1	4	si:ch1073-322p19.1
ppt11	0.00579207	0.114242	0.4	0.124	1	4	ppt1
ddx61	0.00580396	0.155293	0.4	0.127	1	4	ddx61
dennd6aa	0.00580779	0.13658	0.2	0.046	1	4	dennd6aa
med31	0.00581408	0.104389	0.2	0.043	1	4	med31
arl6	0.00581429	0.162689	0.267	0.074	1	4	arl6
rac1a	0.00588327	0.197157	0.2	0.045	1	4	rac1a
optn	0.00589474	0.162689	0.267	0.074	1	4	optn
lactb	0.00595732	0.134402	0.2	0.046	1	4	lactb
slco5a1a	0.00595733	0.133314	0.2	0.046	1	4	slco5a1a
cnot6b	0.00595733	0.133314	0.2	0.046	1	4	cnot6b
st7	0.00603327	0.133314	0.2	0.046	1	4	st7
mrpl35	0.00606727	0.151965	0.133	0.023	1	4	mrpl35
vbp11	0.00611105	0.187816	0.2	0.045	1	4	vbp1
gmfb	0.00612595	0.151491	0.333	0.097	1	4	gmfb
klhdc4	0.00614168	0.159512	0.267	0.074	1	4	klhdc4
si:ch211-212k18.81	0.00616125	0.150044	0.267	0.073	1	4	si:ch211-212k18.8
jak1	0.00619139	0.208091	0.333	0.107	1	4	jak1
hectd1	0.00619297	0.104389	0.2	0.043	1	4	hectd1
setb1	0.00621822	0.283938	0.4	0.132	1	4	setb
itpka	0.00626596	0.130058	0.2	0.046	1	4	itpka
ahr2	0.00629963	0.181344	0.4	0.14	1	4	ahr2
zzef1	0.00631162	0.102589	0.133	0.023	1	4	zzef1
map2k4a	0.00631162	0.102589	0.133	0.023	1	4	map2k4a
pkdc	0.00631162	0.102589	0.133	0.023	1	4	pkdc
pard6gb	0.00631162	0.102589	0.133	0.023	1	4	pard6gb
ctif	0.00631162	0.102589	0.133	0.023	1	4	ctif
ptpdc1a	0.00631162	0.102589	0.133	0.023	1	4	ptpdc1a
bnip2	0.00631162	0.102589	0.133	0.023	1	4	bnip2
blcap1	0.00631236	0.236865	0.4	0.136	1	4	blcap
dtx2	0.00638481	0.101473	0.133	0.023	1	4	dtx2
tefm	0.00638481	0.101473	0.133	0.023	1	4	tefm
plekha8	0.00638481	0.101473	0.133	0.023	1	4	plekha8
adprhl2	0.00638481	0.101473	0.133	0.023	1	4	adprhl2
arid5b	0.00638481	0.101473	0.133	0.023	1	4	arid5b
mical1	0.00638481	0.101473	0.133	0.023	1	4	mical1
metap2b	0.0063965	0.146907	0.2	0.045	1	4	metap2b
rbck1	0.00639718	0.156346	0.267	0.074	1	4	rbck1
cox6c	0.00642441	0.173231	0.533	0.191	1	4	cox6c
agbl5	0.00645868	0.100359	0.133	0.023	1	4	agbl5
rdh12	0.00645868	0.100359	0.133	0.023	1	4	rdh12
ndc1	0.0064614	0.184126	0.133	0.023	1	4	ndc1
h3f3d1	0.0065475	0.365412	1	0.548	1	4	h3f3d
tmem9b	0.00661085	0.142048	0.133	0.023	1	4	tmem9b
hif1ab1	0.0066166	0.150089	0.467	0.158	1	4	hif1ab
vps16	0.00663247	0.16057	0.267	0.075	1	4	vps16
cdkn2aipnl	0.00664834	0.142048	0.133	0.023	1	4	cdkn2aipnl
chmp5b	0.00666005	0.150758	0.4	0.128	1	4	chmp5b
pim11	0.00666195	0.242891	0.467	0.167	1	4	pim1
garem	0.00667935	0.13658	0.2	0.047	1	4	garem
ide	0.00672416	0.138764	0.133	0.023	1	4	ide
ubc1	0.00675185	0.338504	1	0.492	1	4	ubc
eif2a	0.00675398	0.119282	0.2	0.046	1	4	eif2a
psen2	0.00676288	0.13549	0.2	0.047	1	4	psen2
tead1b	0.00679617	0.299356	0.4	0.153	1	4	tead1b
rnf130	0.00681314	0.1574	0.267	0.075	1	4	rnf130
nolc1	0.00683874	0.138764	0.133	0.023	1	4	nolc1
tbc1d10b	0.00684726	0.134402	0.2	0.047	1	4	tbc1d10b
eno3	0.00689835	0.230941	0.467	0.163	1	4	eno3
rreb1a	0.00690498	0.1574	0.267	0.075	1	4	rreb1a
plcb3	0.00693252	0.132228	0.2	0.047	1	4	plcb3
fam173a	0.00693252	0.132228	0.2	0.047	1	4	fam173a
axin1	0.00701103	0.172439	0.267	0.073	1	4	axin1
ccnt2a	0.00701864	0.132228	0.2	0.047	1	4	ccnt2a
im:7136021	0.00701864	0.132228	0.2	0.047	1	4	im:7136021
CU984600.1	0.00701865	0.130058	0.2	0.047	1	4	CU984600.1
tp53	0.00703981	0.156346	0.2	0.046	1	4	tp53
tmem138	0.00710566	0.130058	0.2	0.047	1	4	tmem138
skp1	0.0071543	0.149105	0.733	0.287	1	4	skp1
klf6a2	0.00717514	0.253273	0.933	0.462	1	4	klf6a
adssl	0.00718079	0.1574	0.2	0.046	1	4	adssl
mcrs1	0.00719355	0.128976	0.2	0.047	1	4	mcrs1
atp5fa11	0.0072291	0.385736	0.8	0.412	1	4	atp5fa1
zgc:1626981	0.00737982	0.15214	0.267	0.075	1	4	zgc:162698
nhsl1a	0.0074042	0.156405	0.133	0.024	1	4	nhsl1a
wdr43	0.00750904	0.151091	0.2	0.046	1	4	wdr43
cxxc1a	0.0075362	0.155293	0.267	0.076	1	4	cxxc1a
stox2a	0.00761662	0.182322	0.4	0.145	1	4	stox2a
trafd1	0.00769996	0.186295	0.2	0.049	1	4	trafd1
zfpl1	0.00772884	0.13549	0.2	0.048	1	4	zfpl1
nprl2	0.00772884	0.13549	0.2	0.048	1	4	nprl2
stx8	0.00782306	0.134402	0.2	0.048	1	4	stx8
cdc42ep4b	0.00791822	0.133314	0.2	0.048	1	4	cdc42ep4b
arf4a.1	0.00791822	0.133314	0.2	0.048	1	4	arf4a.1
calm3b	0.00792103	0.168716	0.6	0.232	1	4	calm3b
mat2aa	0.00794257	0.146907	0.267	0.076	1	4	mat2aa
CU639397.1	0.00801434	0.131142	0.2	0.048	1	4	CU639397.1
trim107	0.00811139	0.131142	0.2	0.048	1	4	trim107
calub	0.00811139	0.131142	0.2	0.048	1	4	calub
sgsh	0.00811139	0.131142	0.2	0.048	1	4	sgsh
galnt7	0.00811141	0.130058	0.2	0.048	1	4	galnt7
cst14a.1	0.00811141	0.130058	0.2	0.048	1	4	cst14a.1
si:zfos-128g4.2	0.00816875	0.101473	0.133	0.024	1	4	si:zfos-128g4.2
zgc:113294	0.00816875	0.101473	0.133	0.024	1	4	zgc:113294
cog6	0.00816875	0.101473	0.133	0.024	1	4	cog6
srrm1	0.00817752	0.262806	0.6	0.256	1	4	srrm1
znf106a	0.00820567	0.1574	0.267	0.078	1	4	znf106a
sdhaf4	0.00820944	0.128976	0.2	0.048	1	4	sdhaf4
ftsj3	0.00820944	0.128976	0.2	0.048	1	4	ftsj3
sgta	0.00821254	0.101226	0.2	0.046	1	4	sgta
CABZ01041962.1	0.00825904	0.100359	0.133	0.024	1	4	CABZ01041962.1
hsd17b7	0.00825904	0.100359	0.133	0.024	1	4	hsd17b7
zgc:66447	0.00825904	0.100359	0.133	0.024	1	4	zgc:66447
si:dkey-51a16.9	0.00825904	0.100359	0.133	0.024	1	4	si:dkey-51a16.9
setx	0.00825904	0.100359	0.133	0.024	1	4	setx
gigyf1b	0.00834087	0.157295	0.333	0.108	1	4	gigyf1b
laptm4a1	0.00840941	0.128976	0.533	0.195	1	4	laptm4a
ddx6	0.00842891	0.244545	0.333	0.105	1	4	ddx6
prkab1b	0.00847037	0.245386	0.467	0.178	1	4	prkab1b
BX936337.11	0.00861756	0.201813	0.333	0.105	1	4	BX936337.1
emc2	0.00867687	0.139857	0.133	0.024	1	4	emc2
psmg2	0.00869172	0.146907	0.2	0.047	1	4	psmg2
march7.2	0.00872315	0.139857	0.133	0.024	1	4	march7.2
mtbl	0.00875375	0.150044	0.267	0.078	1	4	mtbl
rhoca	0.00877087	0.138764	0.133	0.024	1	4	rhoca
myclb1	0.00877601	0.252991	0.933	0.487	1	4	myclb
lmbrd1	0.00880702	0.171422	0.333	0.112	1	4	lmbrd1
pnpla7a	0.00886686	0.150044	0.267	0.078	1	4	pnpla7a
syngr2b	0.00887169	0.118337	0.067	0.007	1	4	syngr2b
slc35b1	0.00888788	0.134402	0.2	0.049	1	4	slc35b1
ier3ip11	0.00893623	0.108621	0.2	0.047	1	4	ier3ip1
sdhc1	0.00894818	0.242462	0.333	0.11	1	4	sdhc
eif4eb	0.00896134	0.13658	0.133	0.024	1	4	eif4eb
znf800b	0.00899356	0.133314	0.2	0.049	1	4	znf800b
pcna	0.00904555	0.434125	0.067	0.007	1	4	pcna
alyref1	0.00904758	0.250081	0.2	0.047	1	4	alyref
mtdha	0.00907043	0.200861	0.333	0.107	1	4	mtdha
ehd1a	0.00910026	0.132228	0.2	0.049	1	4	ehd1a
mt-atp8	0.00910027	0.131142	0.2	0.049	1	4	mt-atp8
idh2	0.00910251	0.254009	0.6	0.255	1	4	idh2
si:ch211-132b12.8	0.00910945	0.17335	0.133	0.024	1	4	si:ch211-132b12.8
gosr2	0.0091487	0.180881	0.2	0.05	1	4	gosr2
cox7b	0.00917274	0.128557	0.667	0.249	1	4	cox7b
dcxr	0.009208	0.130058	0.2	0.049	1	4	dcxr
tmem203	0.00922199	0.112684	0.067	0.007	1	4	tmem203
hsd11b1la	0.00926278	0.154241	0.267	0.079	1	4	hsd11b1la
irs2b	0.00927302	0.164334	0.333	0.111	1	4	irs2b
col6a1	0.00931135	0.112684	0.067	0.007	1	4	col6a1
dnajc9	0.00931135	0.110432	0.067	0.007	1	4	dnajc9
si:dkey-97a13.6	0.00931678	0.128976	0.2	0.049	1	4	si:dkey-97a13.6
zgc:109949	0.00938137	0.15319	0.267	0.079	1	4	zgc:109949
mapkapk5	0.00938143	0.150044	0.267	0.079	1	4	mapkapk5
sypl2a	0.0093943	0.151091	0.2	0.048	1	4	sypl2a
nkap	0.00939529	0.106002	0.267	0.073	1	4	nkap
mepce	0.00940158	0.111557	0.067	0.007	1	4	mepce
anxa2a	0.0094016	0.160864	0.067	0.007	1	4	anxa2a
sec23a	0.00942659	0.128976	0.2	0.049	1	4	sec23a
sgpl1	0.00942661	0.127894	0.2	0.049	1	4	sgpl1
hint11	0.00945788	0.202307	0.533	0.209	1	4	hint1
srsf11	0.00948173	0.136424	0.333	0.103	1	4	srsf11
abhd17c	0.00949215	0.110432	0.067	0.007	1	4	abhd17c
rtraf	0.00949215	0.109308	0.067	0.007	1	4	rtraf
zgc:110182	0.00949253	0.110432	0.067	0.007	1	4	zgc:110182
cox5aa	0.00949255	0.258945	0.733	0.313	1	4	cox5aa
ppp4ca	0.00958406	0.109308	0.067	0.007	1	4	ppp4ca
tdrd5	0.00958406	0.109308	0.067	0.007	1	4	tdrd5
si:ch211-146l10.7	0.00961217	0.220212	0.133	0.024	1	4	si:ch211-146l10.7
hnrnpd	0.00973601	0.195123	0.267	0.076	1	4	hnrnpd
baxb	0.00974481	0.146907	0.267	0.079	1	4	baxb
ccna1	0.00981967	0.177538	0.133	0.024	1	4	ccna1
rbmx1	0.00994233	0.138436	0.267	0.074	1	4	rbmx
si:ch211-226h8.4	0.0099592	0.127894	0.067	0.007	1	4	si:ch211-226h8.4
